# Supplementary material
Source: publisher site journal article supplement (https://www.degruyterbrill.com/publication/isbn/9783486719048/downloadAsset/9783486719048_Folien--de.zip)
Supplement: Supplementary file 1 [file 9783486719048_Folien--de.zip]

## Teil D

# Informationssysteme der Personalwirtschaft

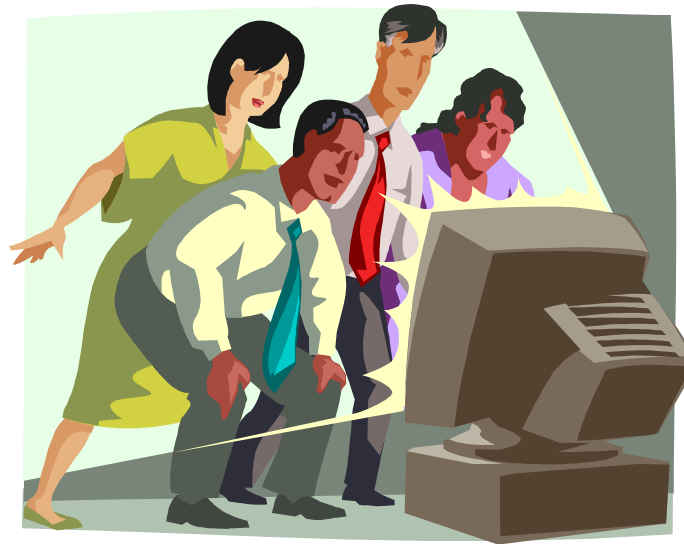

Januar 2011

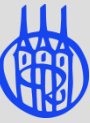

## **Inhaltsverzeichnis**

- 1. Grundlagen**
- 2. Organisation von Personaldaten**
- 3. Personalinformationssysteme (PIS)**
- 4. Personalbeurteilung**
- 5. Arbeitszeugnis**
- 6. Datenschutz von Personaldaten**

# 1. Grundlagen

- 1.1 Personaldaten im Unternehmen
- 1.2 Begriffsbestimmung Personalinformationssystem
- 1.3 Aufgaben der Personaldatenverarbeitung
- 1.4 Ziele der Personaldatenverarbeitung

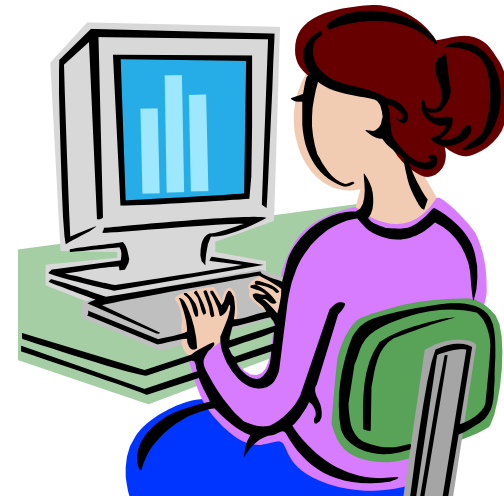

## Informationssysteme der Personalwirtschaft

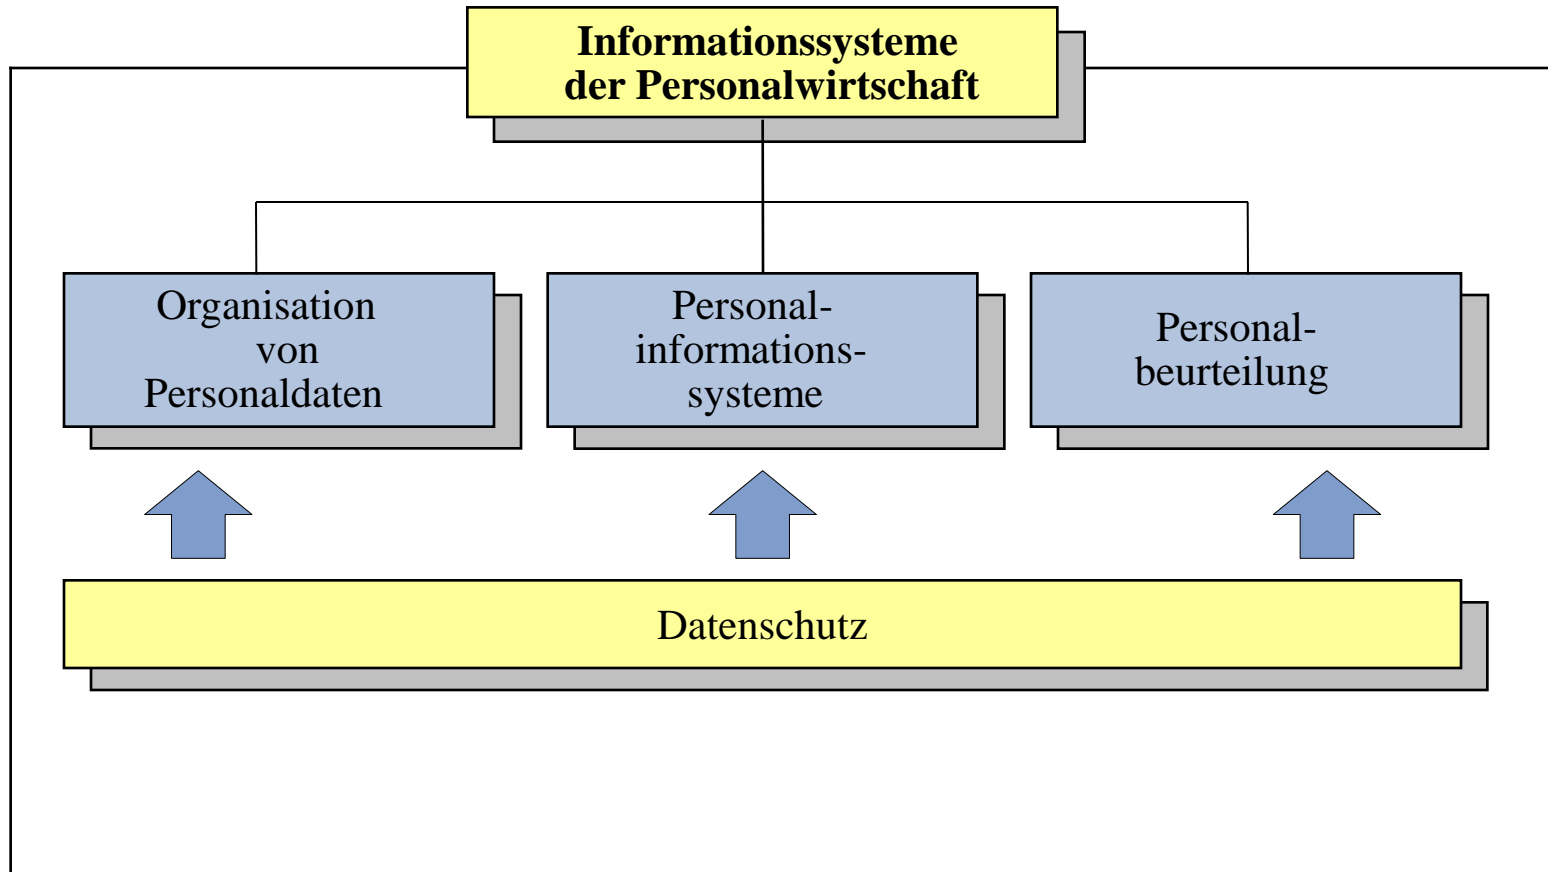

S. 655 Abb. 1

Jung, Hans: Personalwirtschaft, 9. Aufl., München 2010.

© Oldenbourg Wissenschaftsverlag

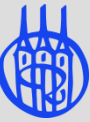

Zu den **praktischen Verwaltungsaufgaben** der Personalverwaltung gehören:

- das Erstellen der **Entgeltabrechnungen**,
- die Auszahlung von **Gehalts- und Lohnzulagen**,
- die Be- und Verrechnung von **Unfallversicherungs- und Rentenabzügen**,
- das Erstellen von **Betriebsstatistiken**, z.B. in Form von Betriebszählungen und Erhebungsbögen sowie
- das Bearbeiten von **internen Daten** wie das Erstellen eines Telefonverzeichnisses oder die Arbeitszeiterfassung.

Voraussetzung für eine effektive Personalverwaltung ist ein Mindestmass an Daten, die permanent erfasst und aufbereitet werden müssen.

Die Daten können dabei aus verschiedenen Abteilungen kommen wie die folgende Abbildung zeigt:

## Personalverwaltung als Drehscheibe zu internen und externen Abteilungen

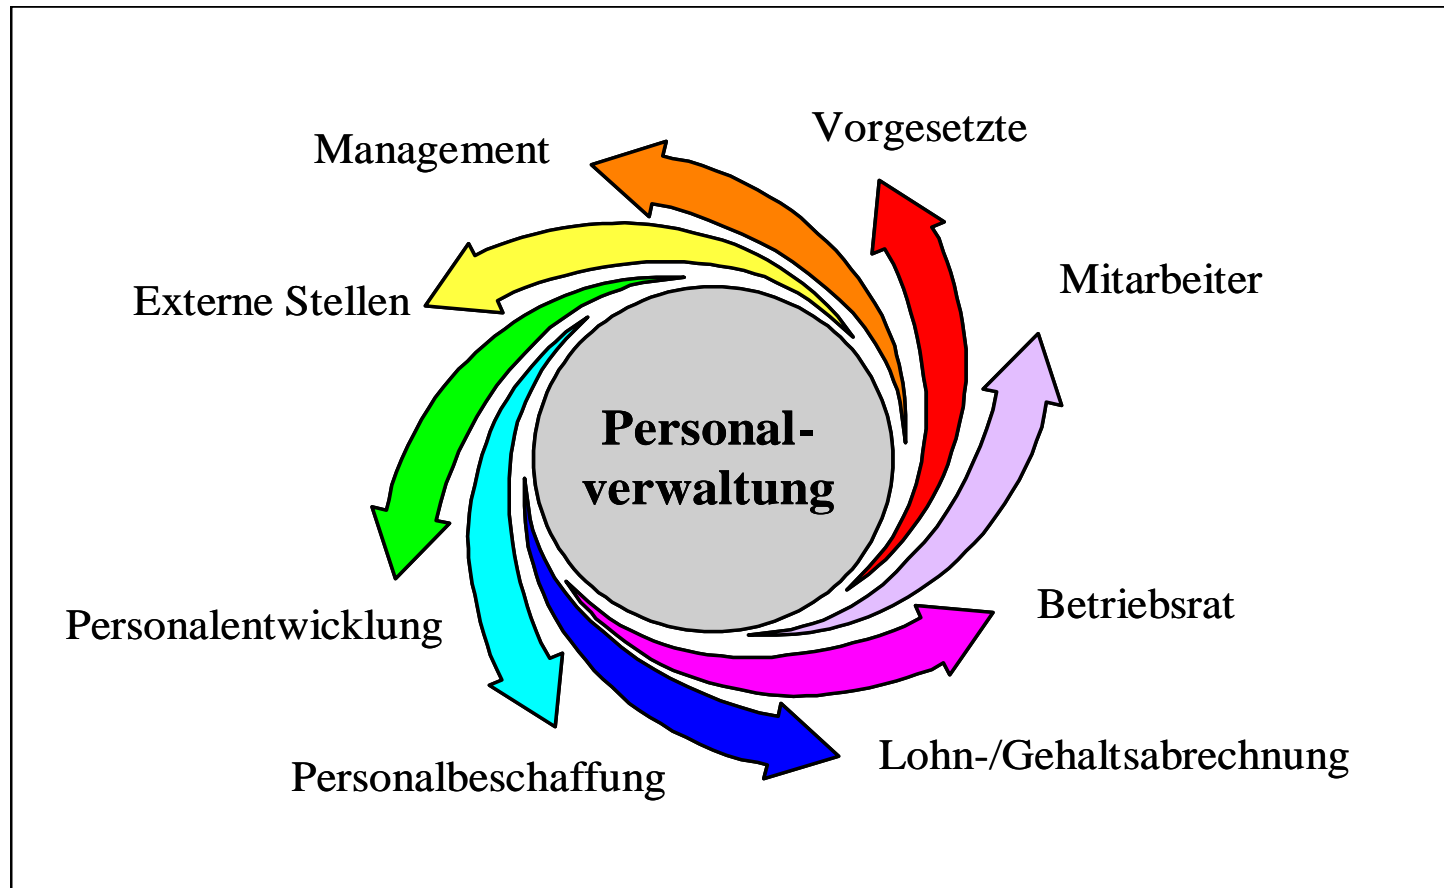

S. 657 Abb. 2

Jung, Hans: Personalwirtschaft, 9. Aufl., München 2010.

© Oldenbourg Wissenschaftsverlag

## Hierarchische Stellung der Personalwirtschaft

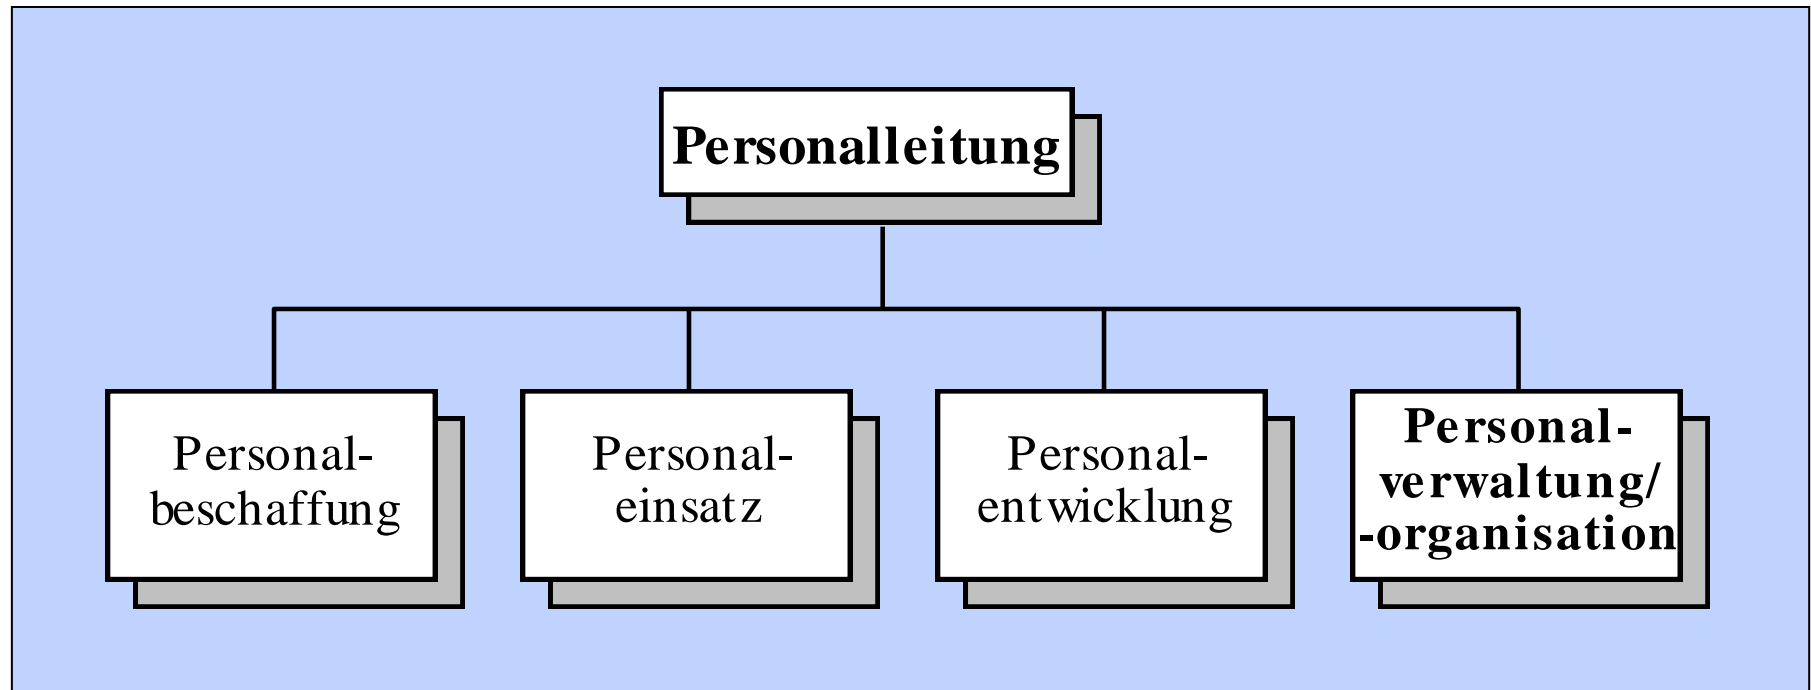

S. 657 Abb. 3

Jung, Hans: Personalwirtschaft, 9. Aufl., München 2010.

© Oldenbourg Wissenschaftsverlag

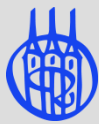

Datengerüst für die  
Personalverwaltung

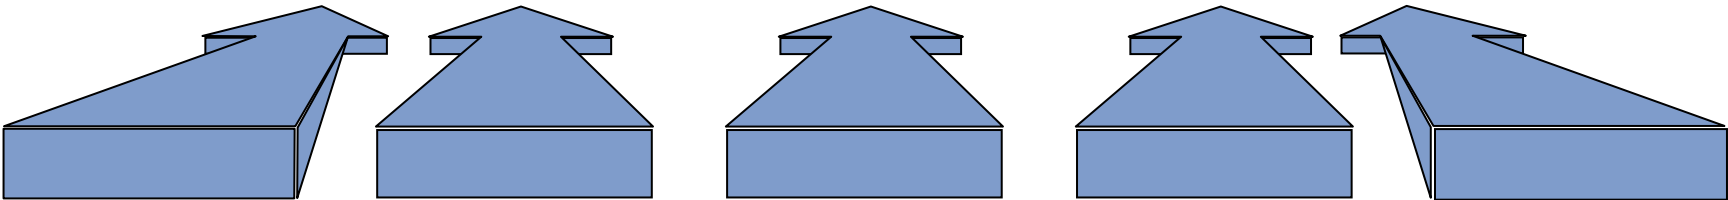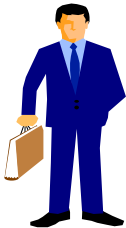

**Personen-  
bezogene Daten**

**z.B.:** Personalbestand,  
Urlaubslisten

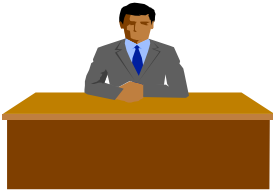

**Stellen-  
bezogene Daten**

Stellen- oder  
Anforderungsprofile

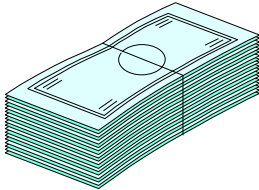

**Entgelt-  
bezogene Daten**

Tarifliche- und  
übertarifliche  
Arbeitsentgelte

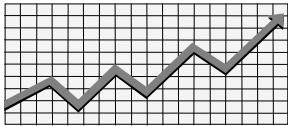

**Markt-  
bezogene Daten**

Umsatz-  
entwicklung

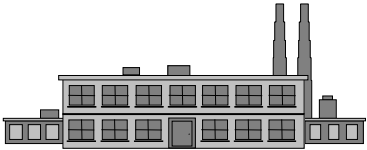

**Produktions-  
bezogene Daten**

Ausbringungs-  
menge





## Begriffsbestimmung Personalinformationssystem

- Die Vielzahl von Daten ist ohne EDV oftmals nicht mehr handhabbar.
- Dadurch wird der Einsatz eines Personalinformationssystems notwendig, welches ein Bestandteil des Gesamtsystems ist.
- Durch die Vernetzung mit anderen Systemen ist ein gegenseitiger Datentransfer möglich
- Dadurch wird eine Vereinheitlichung des Datenbestandes möglich, der eine spätere Anpassung überflüssig macht.

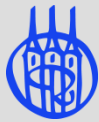

Innerbetriebliche Vernetzung von Informationssystemen

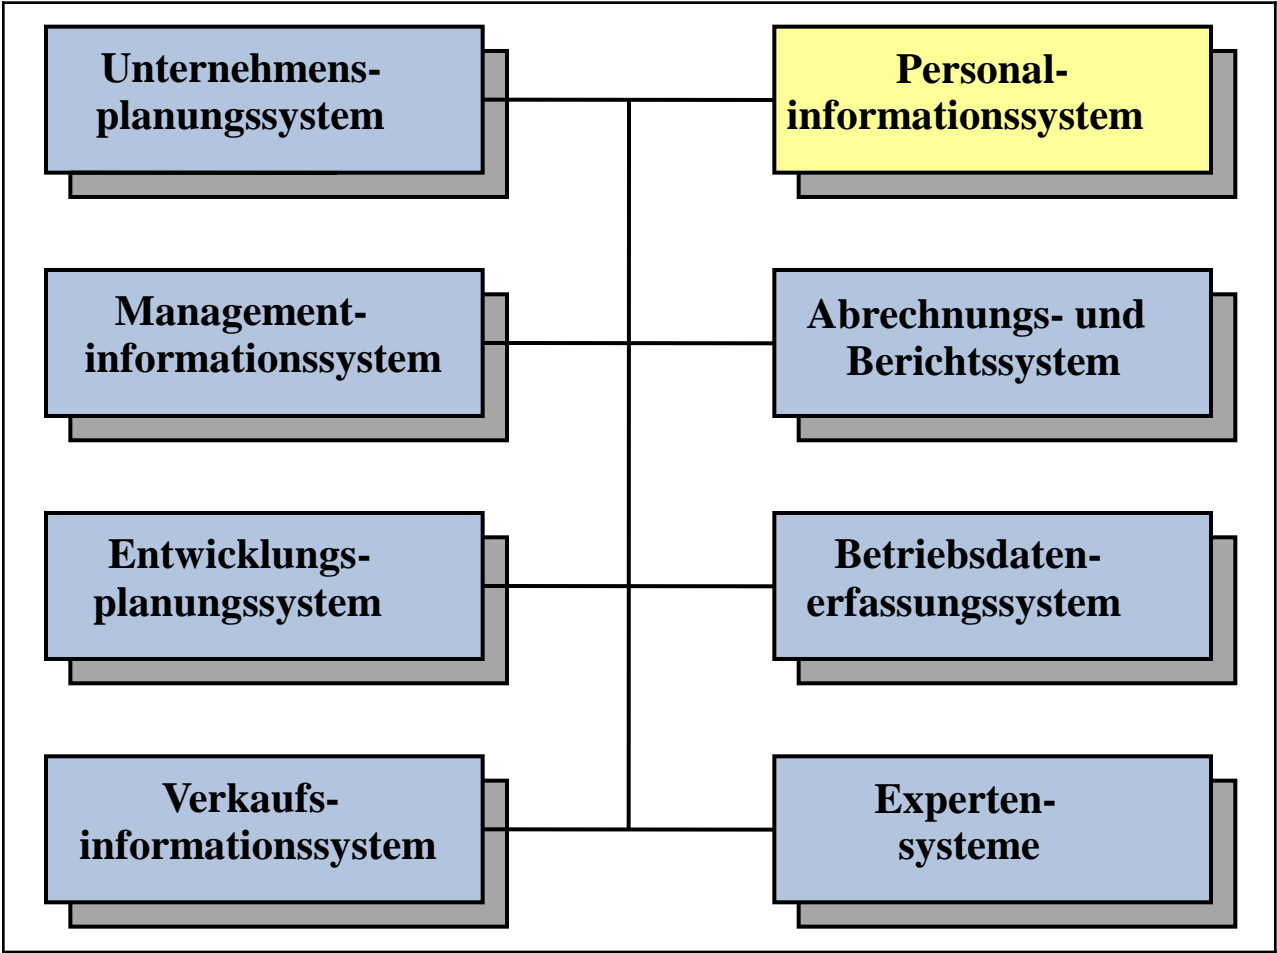

S. 659 Abb. 5

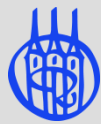

Führungs- und Verwaltungsaufgaben im Personal- und Arbeitsbereich

| Personalbezogene Aspekte  | Arbeitsplatzbezogene Aspekte  |
|---------------------------|-------------------------------|
| Personalbedarfsermittlung | Arbeitsplatzbedarfsermittlung |
| Personalbeschaffung       | Arbeitsplatzbeschaffung       |
| Personalentwicklung       | Arbeitsplatzverbesserung      |
| Personaleinsatz           | Arbeitsplatzeingliederung     |
| Personalbeurteilung       | Arbeitsplatzerhaltung         |
| Personalentlohnung        | Arbeitsplatzbewertung         |
| Personalfreisetzung       | Arbeitsplatzauflösung         |
| Personalorganisation      | Arbeitsplatzorganisation      |

S. 660 Abb. 6



## Notizen

## 2. Organisation von Personaldaten

- 2.1 Personalakte
- 2.2 Personalkartei
- 2.3 Personaldateien
- 2.4 Entgeltregelung
- 2.5 Weitere Rechenwerke
- 2.6 Personalstatistik
- 2.7 Personalhandbuch
- 2.8 Formulare
- 2.9 Schemabriefe und Textbausteine

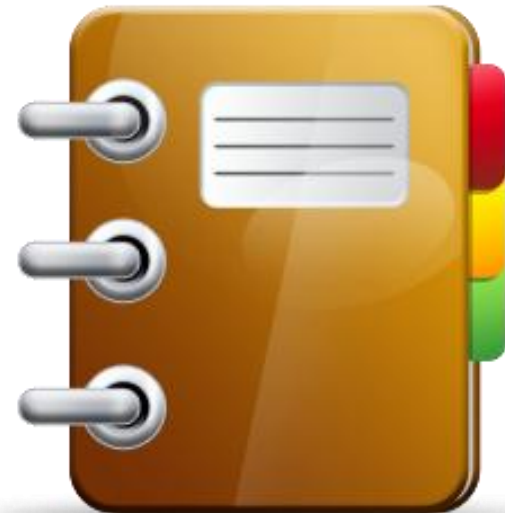



## Die Personalakte

- Es soll **für jeden Arbeitnehmer** eine Personalakte geführt werden.
- Diese sollte **zentral** in der Personalabteilung **verwaltet** werden.
- Die Personalakte muss **vollständig** sein, das heißt sie muss regelmäßig um die Unterlagen **ergänzt** werden, die das Bild des Mitarbeiters vervollständigen.
- Es sollte **nur eine Personalakte** geführt werden, sogenannte "Schattenakten" müssen auch dem Arbeitnehmer zugänglich sein (§ 83 Abs.1 BetrVG).

Neben diesen **einsichtspflichtigen** Unterlagen können auch **nicht einsichtspflichtige** Unterlagen existieren. Zu diesen zählen Unterlagen, die Informationen über andere Mitarbeiter enthalten, wie beispielsweise **Gehaltsgegenüberstellungen**.



Gliederung der Personalakte (Muster)

| Personalakte                                                                                                                                                                                                                                                                                                                                                                                                                             |
|------------------------------------------------------------------------------------------------------------------------------------------------------------------------------------------------------------------------------------------------------------------------------------------------------------------------------------------------------------------------------------------------------------------------------------------|
| I. Angaben über die persönlichen Daten                                                                                                                                                                                                                                                                                                                                                                                                   |
| Personalbogen (evtl. mit Lichtbild)<br>Bewerbungsschreiben<br>Zeugnisse über den Bildungs- und beruflichen Werdegang<br>Polizeiliches Führungszeugnis<br>Ärztliches Zeugnis<br>Persönliche Veränderungen, z.B. Heirat, Wohnungswechsel                                                                                                                                                                                                   |
| II. Vertragliche Vereinbarungen                                                                                                                                                                                                                                                                                                                                                                                                          |
| Einstellungsschreiben mit vereinbartem Lohn/Gehalt<br>Original des Anstellungsvertrages (Arbeitsvertrag)<br>Zusätzliche Vereinbarungen z.B. über Zusatzleistungen (Deputate, Dividende)<br>Gewährung statusabhängiger Leistungen (Einrichtung des Arbeitszimmers)<br>Benutzung bestimmter betrieblicher Einrichtungen<br>Änderung der Bezüge oder der Tätigkeit<br>Zusätzliche Vereinbarungen zum Arbeitsvertrag, z.B. Konkurrenzklausel |

S. 664 Abb. 7 A



(Fortsetzung)

| III. Tätigkeit                                                                                                                                                              |                                                                                        |
|-----------------------------------------------------------------------------------------------------------------------------------------------------------------------------|----------------------------------------------------------------------------------------|
| Versetzungen<br>Abordnungen<br>Beförderungen<br>Disziplinarmaßnahmen                                                                                                        | Tätigkeitsberichte<br>Beurteilungen<br>Weiterbildungsmaßnahmen                         |
| IV. Bezüge                                                                                                                                                                  |                                                                                        |
| Grundentgelt<br>Prämien/Zulagen<br>Vorschüsse<br>Darlehen und Beihilfen                                                                                                     | Lohnsteuer<br>Sozialversicherungen<br>Krankenversicherungen<br>Sonstige Versicherungen |
| V. Abwesenheit                                                                                                                                                              |                                                                                        |
| Registrierung der Krankentage                                                                                                                                               | Urlaub                                                                                 |
| VI. Allgemeiner Schriftverkehr                                                                                                                                              |                                                                                        |
| Jeder Schriftverkehr, soweit er nicht zu den Ordnungsmerkmalen I.-V. im direkten oder indirekten Zusammenhang steht, z.B. Arbeitsamt, Sozialversicherungsträger, Bundeswehr |                                                                                        |



## Personaldateitypen

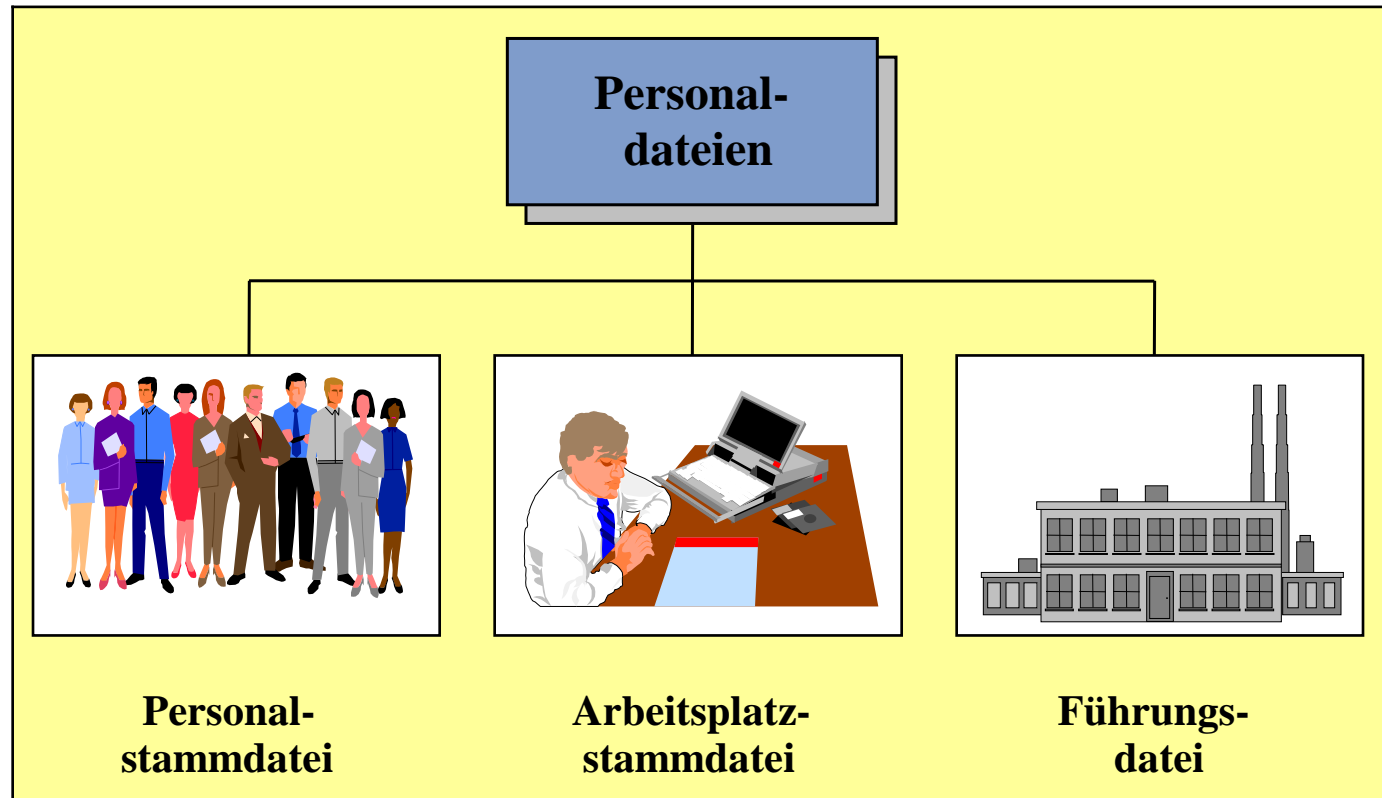

S. 665 Abb. 8

Jung, Hans: Personalwirtschaft, 9. Aufl., München 2010.

© Oldenbourg Wissenschaftsverlag



Typische Datenelemente der Personalstammdatei

| 1. Persönliche Daten                                                                                                                                                                                                                                                                                                                                                                                                                                              | 3. Daten zum Entgelt:                                                                                                                                                                                                                                                                                                                                                                                                                                               |
|-------------------------------------------------------------------------------------------------------------------------------------------------------------------------------------------------------------------------------------------------------------------------------------------------------------------------------------------------------------------------------------------------------------------------------------------------------------------|---------------------------------------------------------------------------------------------------------------------------------------------------------------------------------------------------------------------------------------------------------------------------------------------------------------------------------------------------------------------------------------------------------------------------------------------------------------------|
| <ul style="list-style-type: none"><li>- Name, Vorname</li><li>- Geschlecht, Alter</li><li>- Geburtsort, Geburtsland</li><li>- Nationalität</li><li>- Wehr-/ Zivildienst</li><li>- Kranken-/ Rentenversicherungscod</li><li>- Schul-/ Hochschul- und Weiterbildung</li><li>- Daten zu Kindern</li><li>- Adresse</li><li>- Telefonnummer privat</li></ul>                                                                                                           | <ul style="list-style-type: none"><li>- Lohn-/ Gehaltsart</li><li>- Summe Monatsgehalt</li><li>- Gehaltserhöhungen</li><li>- Überstundensatz (25%, 50%, 100%)</li><li>- Urlaubsgeld</li><li>- Gratifikationen</li><li>- Prämien</li><li>- Unfallversicherungsbeiträge</li><li>- Pensionskassenbeitrag</li><li>- Gesetzliche Rentenversicherung</li><li>- Arbeitslosenversicherung</li><li>- Darlehensrückzahlungen</li><li>- Vermögenswirksame Leistungen</li></ul> |
| 2. Firmeninterne Daten:                                                                                                                                                                                                                                                                                                                                                                                                                                           | 4. Zeitdaten:                                                                                                                                                                                                                                                                                                                                                                                                                                                       |
| <ul style="list-style-type: none"><li>- Eintrittsdatum</li><li>- Anstellungsart</li><li>- Persönliches Kurzzeichen</li><li>- Kostenstelle</li><li>- Abteilung</li><li>- Arbeitsplatznummer</li><li>- Personalnummer</li><li>- Interne Telefonnummer</li><li>- Leistungsbeurteilung</li><li>- Betriebskrankenkasse</li><li>- Kontonummer für Gehaltsüberweisung</li><li>- Gehaltsklasse/ Spesenklasse</li><li>- Parkplatznummer</li><li>- Austrittsdatum</li></ul> | <ul style="list-style-type: none"><li>- Betriebszugehörigkeit</li><li>- Zeiten früherer Anstellung</li><li>- Jubiläumsdaten</li><li>- Fehlzeiten durch:</li><li>- Krankheit</li><li>- Berufsunfall</li><li>- Fehlzeiten durch:</li><li>- geschäftliche Abwesenheit</li><li>- Militär-/ Zivildienst</li><li>- Mutterschutz</li><li>- unbezahlten Urlaub</li><li>- Ansprüche auf Ferienzeiten</li></ul>                                                               |

S. 666 Abb. 9

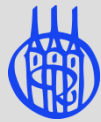

Mitarbeiterkategorien nach zeitlichen Kriterien

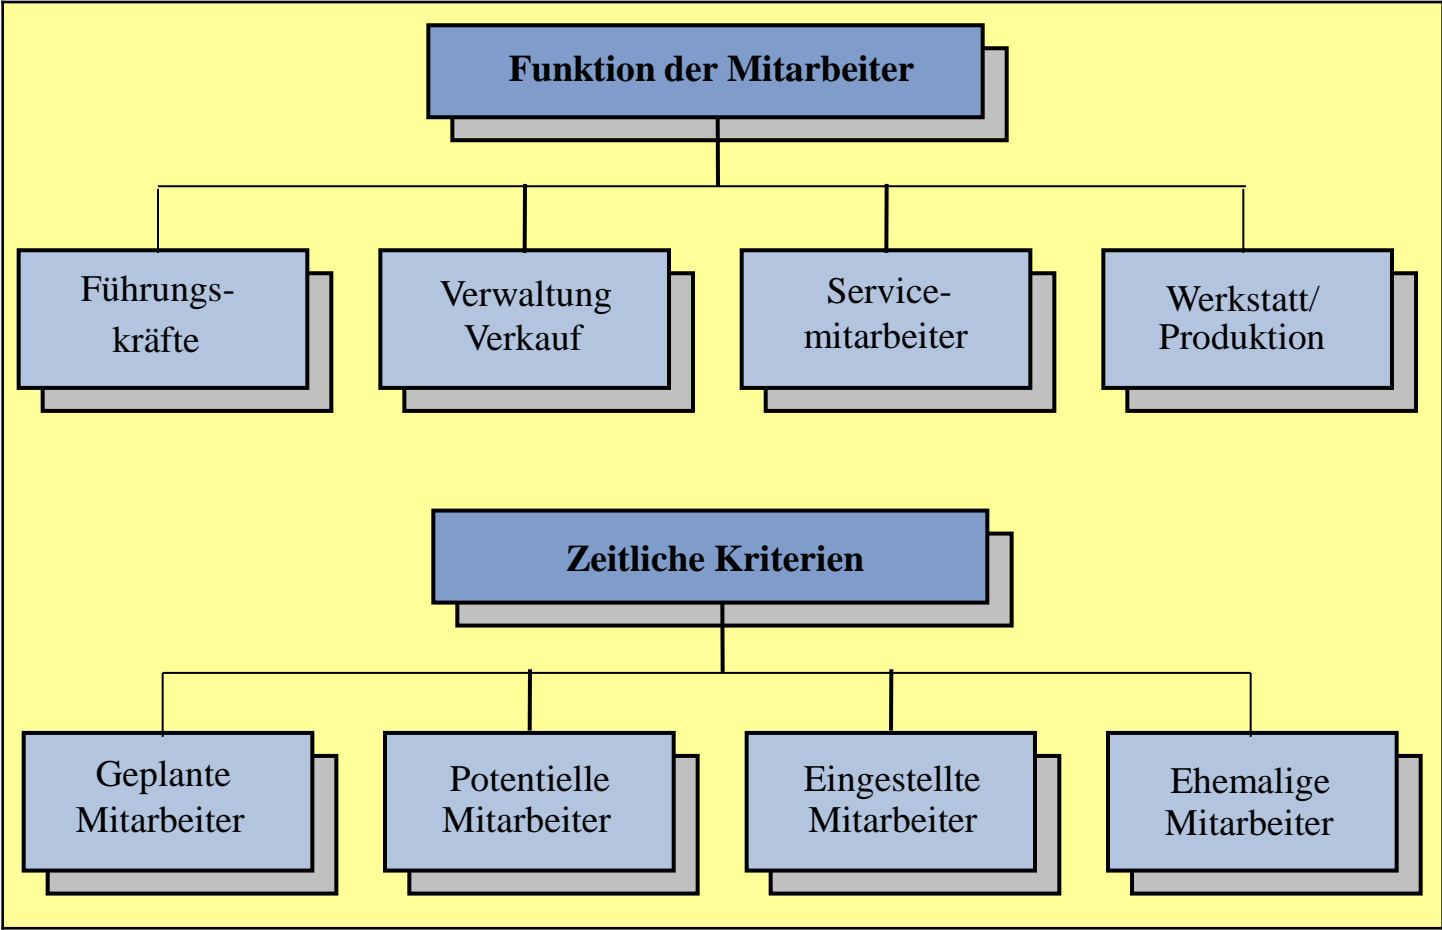

S. 667 Abb. 10 und 11



## Personaldateien

Um die notwendigen Informationen auf den speziellen Arbeitsplatz abstimmen zu können, sind verschiedene Dateien notwendig:

➤ Die Arbeitsplatzstammdatei

➤ Die Führungsdatei

sowie die

➤ Ablage und Archivierung von Personaldaten

➤ Die Entgeltrechnung



Typische Datenelemente der Arbeitsplatzstammdatei

| Stellenbezogene Daten:                                                                                                                                                                                                  | Mitarbeiterbezogene Daten:                                                                                                                                                                          | Beurteilungsdaten:                                                                                                                                                                                      |
|-------------------------------------------------------------------------------------------------------------------------------------------------------------------------------------------------------------------------|-----------------------------------------------------------------------------------------------------------------------------------------------------------------------------------------------------|---------------------------------------------------------------------------------------------------------------------------------------------------------------------------------------------------------|
| <ul style="list-style-type: none"><li>- Stellenbeschreibung</li><li>- Art der Tätigkeit</li><li>- Stellung im Gesamtprozess</li><li>- Nummer der Tätigkeit</li><li>- Rang der Tätigkeit</li><li>- Zulagefähig</li></ul> | <ul style="list-style-type: none"><li>- interne oder externe Personalbeschaffung</li><li>- notwendige Qualifikation</li><li>- Entlohnung</li><li>- Alter</li><li>- Anzahl der Mitarbeiter</li></ul> | <ul style="list-style-type: none"><li>- zu erbringende Leistung</li><li>- Kontrollmöglichkeiten</li><li>- Art der Beurteilung</li><li>- Vergleichszahlen</li><li>- Häufigkeit der Beurteilung</li></ul> |

S. 668 Abb. 12

## Führungsdatei

- Sie dient zur Abspeicherung von Daten über die Gesamtheit der Mitarbeiter bzw. aus zusammengestellten Gruppen
- Außerdem dient sie zur Auswertung von statistischen Daten und Zeitreihendaten wie:

- |                      |                          |
|----------------------|--------------------------|
| • Belegschaftszahlen | • Fluktuation            |
| • Personalzugänge    | • Personalkosten         |
| • Überstunden        | • Aus- und Weiterbildung |



## Ablage und Archivierung von Personaldaten

- Personaldaten veralten relativ schnell
- Alte Personaldaten veralten aber relativ schnell wieder
- Aktuelle und alte Daten getrennt aufbewahren
- Im Normalfall Datenbestand von 3- 5 Jahre
- Insbesondere Dateien über Beförderungen, Gehalts- und Lohnentwicklung und Arbeitsplatzwechsel betroffen
- Oft Datensplittung in Arbeiter- und Angestellte-dateien
- Oder aktive und ehemalige Mitarbeiter



# Die Entgeltrechnung

- Je nach Mitarbeiterstatus im Unternehmen existieren unterschiedliche Entgeltformen z.B.:

| Mitarbeiterstatus                                                                                                                         | Entgeltformen                                                                                                                                  |
|-------------------------------------------------------------------------------------------------------------------------------------------|------------------------------------------------------------------------------------------------------------------------------------------------|
| <ul style="list-style-type: none"><li>• Arbeiter</li><li>• Auszubildender</li><li>• Außendienstmitarbeiter</li><li>• Pensionäre</li></ul> | <ul style="list-style-type: none"><li>• Lohn</li><li>• Ausbildungsvergütung</li><li>• Prämien bzw. Provision</li><li>• Betriebsrente</li></ul> |

S. 669ff.



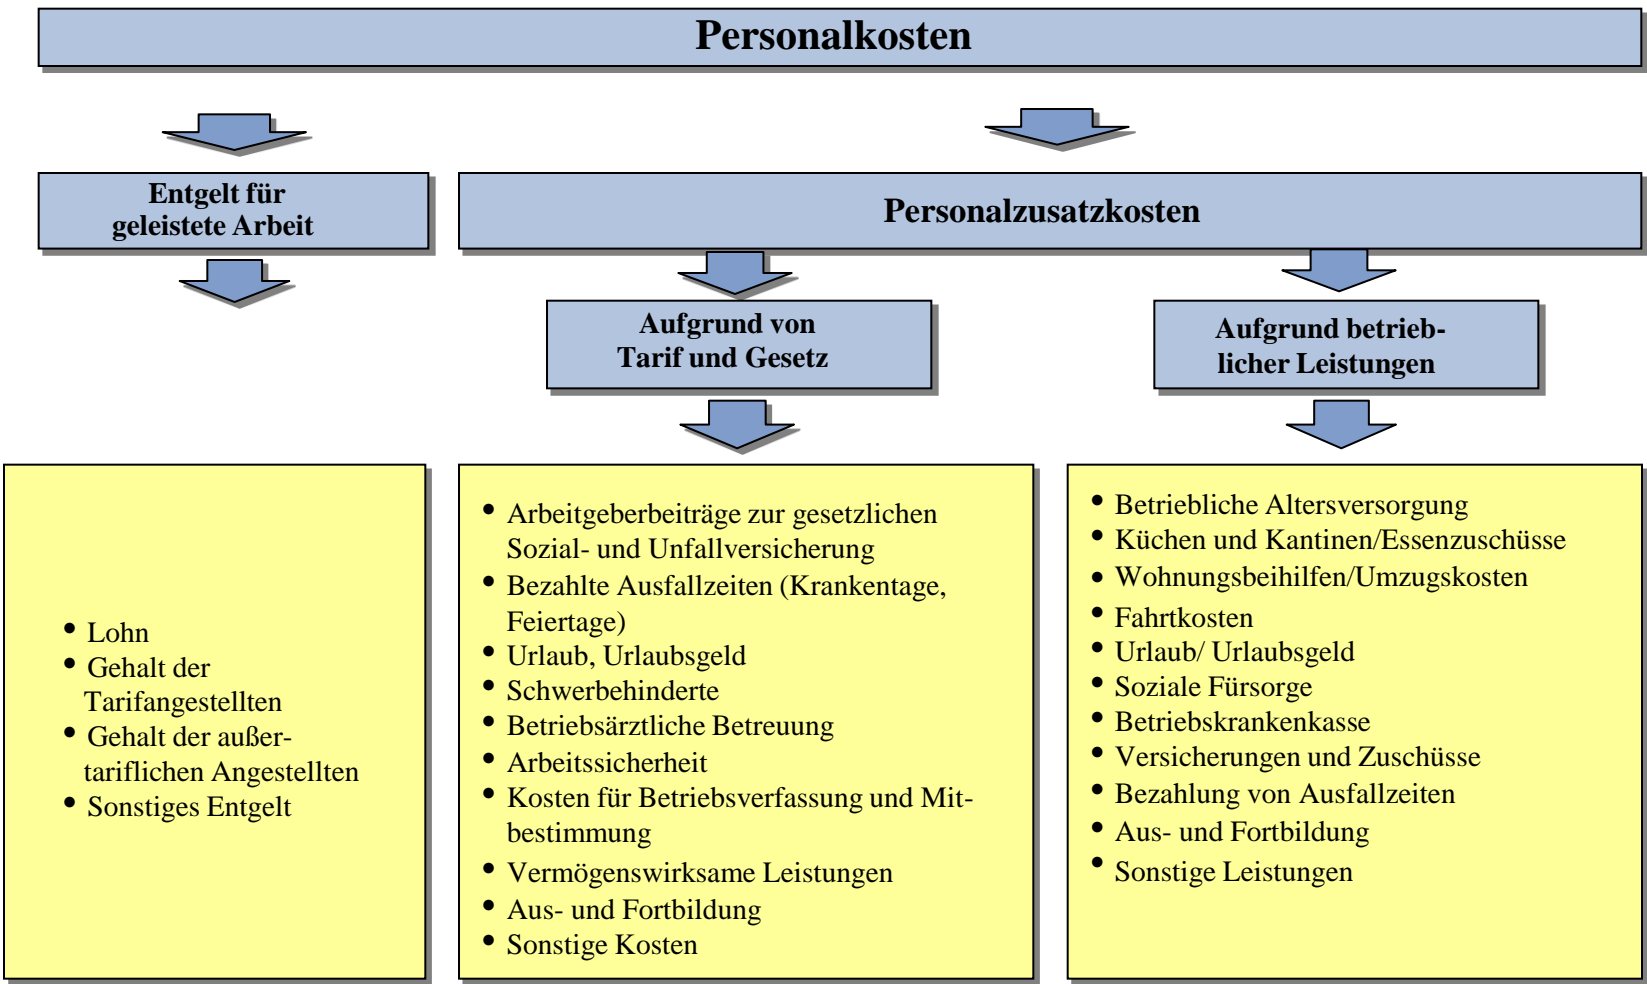

S. 669 Abb. 13  
(in Anlehnung an: RKW - Handbuch Personalplanung, 2. Aufl., Neuwied/Frankfurt am Main 1990, S. 420)

## Die Entgeltrechnung

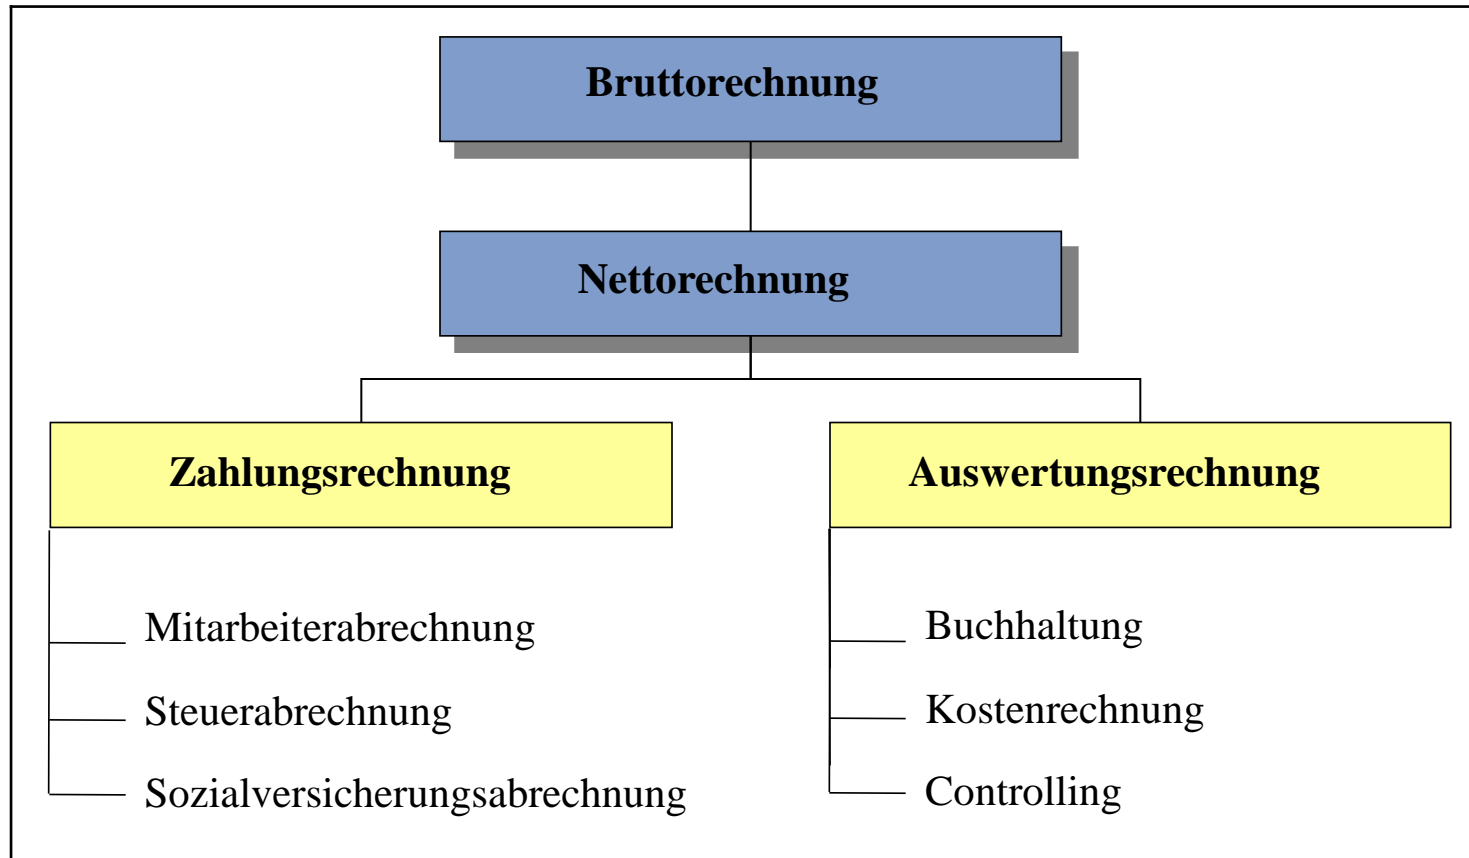

S. 670 Abb. 14

(in Anlehnung an: Olfert, K.: Personalwirtschaft, 10. Auflage, Ludwigshafen (Rhein) 2003, S. 571 f)

Jung, Hans: Personalwirtschaft, 9. Aufl., München 2010.

© Oldenbourg Wissenschaftsverlag



### Bestandteile des Sozialberichts

- Gesamtpersonalbestand
- Struktur des Personalbestands
- Betriebliche Altersversorgung
- Mitarbeiterschulungen
- Änderungen bezgl. der Arbeitszeit und der Entlohnung
- Gewinnbeteiligungen der Mitarbeiter, Weihnachtsgratifikation
- Betriebsveranstaltungen
- Werkswohnungen/Ferienheime
- Urlaubsregelungen
- Freizeitgestaltung
- Innerbetriebliche Darlehen
- Betriebskindergärten

S. 670 Abb. 15



## Nettorechnung

### **Bruttoentgelt**

- Lohnsteuer
- Kirchensteuer
- Krankenversicherung
- Pflegeversicherung
- Arbeitslosenversicherung
- Rentenversicherungsbeitrag

**= Nettoentgelt**



## Weitere Rechenwerke

- **Sozialbericht**
- **Humanvermögensrechnung**
- **Sozialbilanz**

S. 672 ff.

Jung, Hans: Personalwirtschaft, 9. Aufl., München 2010.

© Oldenbourg Wissenschaftsverlag



| Personalinvestitionskonto für den Abteilungsleiter/ EDV |               |                                                                                            |               |
|---------------------------------------------------------|---------------|--------------------------------------------------------------------------------------------|---------------|
| Beschaffung:                                            | 60.000,- EUR  |                                                                                            |               |
| Einarbeitung:                                           | 35.000,- EUR  |                                                                                            |               |
| Fortbildung:                                            | 15.000,- EUR  |                                                                                            |               |
|                                                         |               | Abschreibung der Humanakquisition:<br>(10 %, da geschätzte Betriebszugehörigkeit 10 Jahre) | 9.500,- EUR   |
|                                                         |               | Abschreibung der Fortbildung:<br>(25 %, da 4 Jahre Nutzung)                                | 3.750,- EUR   |
|                                                         |               | Schlussbestand:<br>Humanvermögenssammelkonto                                               | 96.750,- EUR  |
| Σ                                                       | 110.000,- EUR | Σ                                                                                          | 110.000,- EUR |

## Sozialbilanz

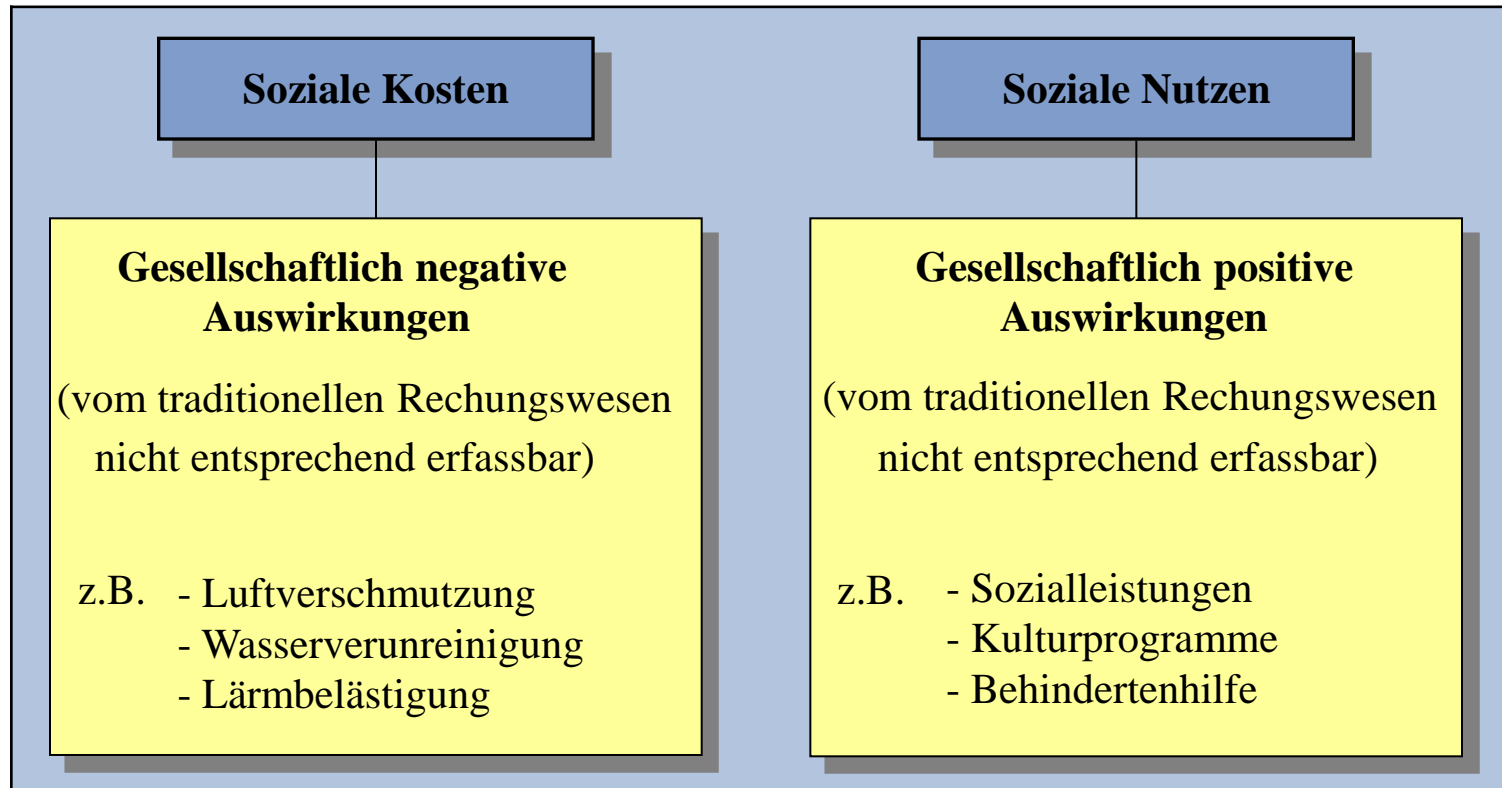

S. 676 Abb. 17

(in Anlehnung an: Hentze, J.: Personalwirtschaftslehre 2, 5. Aufl., Bern/Stuttgart 1991, S. 315 f)

Jung, Hans: Personalwirtschaft, 9. Aufl., München 2010.

© Oldenbourg Wissenschaftsverlag



## Personalstatistik

Fasst man die wichtigsten **Aufgabenbereiche der Personalstatistik** zusammen, so kommt man zu folgender Übersicht:

- Informationsaufgabe, z.B. Stand oder Veränderungen im Personalbereich
- Kontrollaufgabe, z.B. Ursachen für Fluktuationen, Inanspruchnahme der angebotenen freiwilligen Sozialleistungen
- Entscheidungshilfe
- Dokumentationsaufgabe, z.B. zur Bildung von Kennziffern oder Trendanalysen
- Erfüllung gesetzlicher Verpflichtungen, z.B. Datenspeicherung im Personal- und Sozialbereich





Statistische Auswertung  
(1) Säulendiagramm

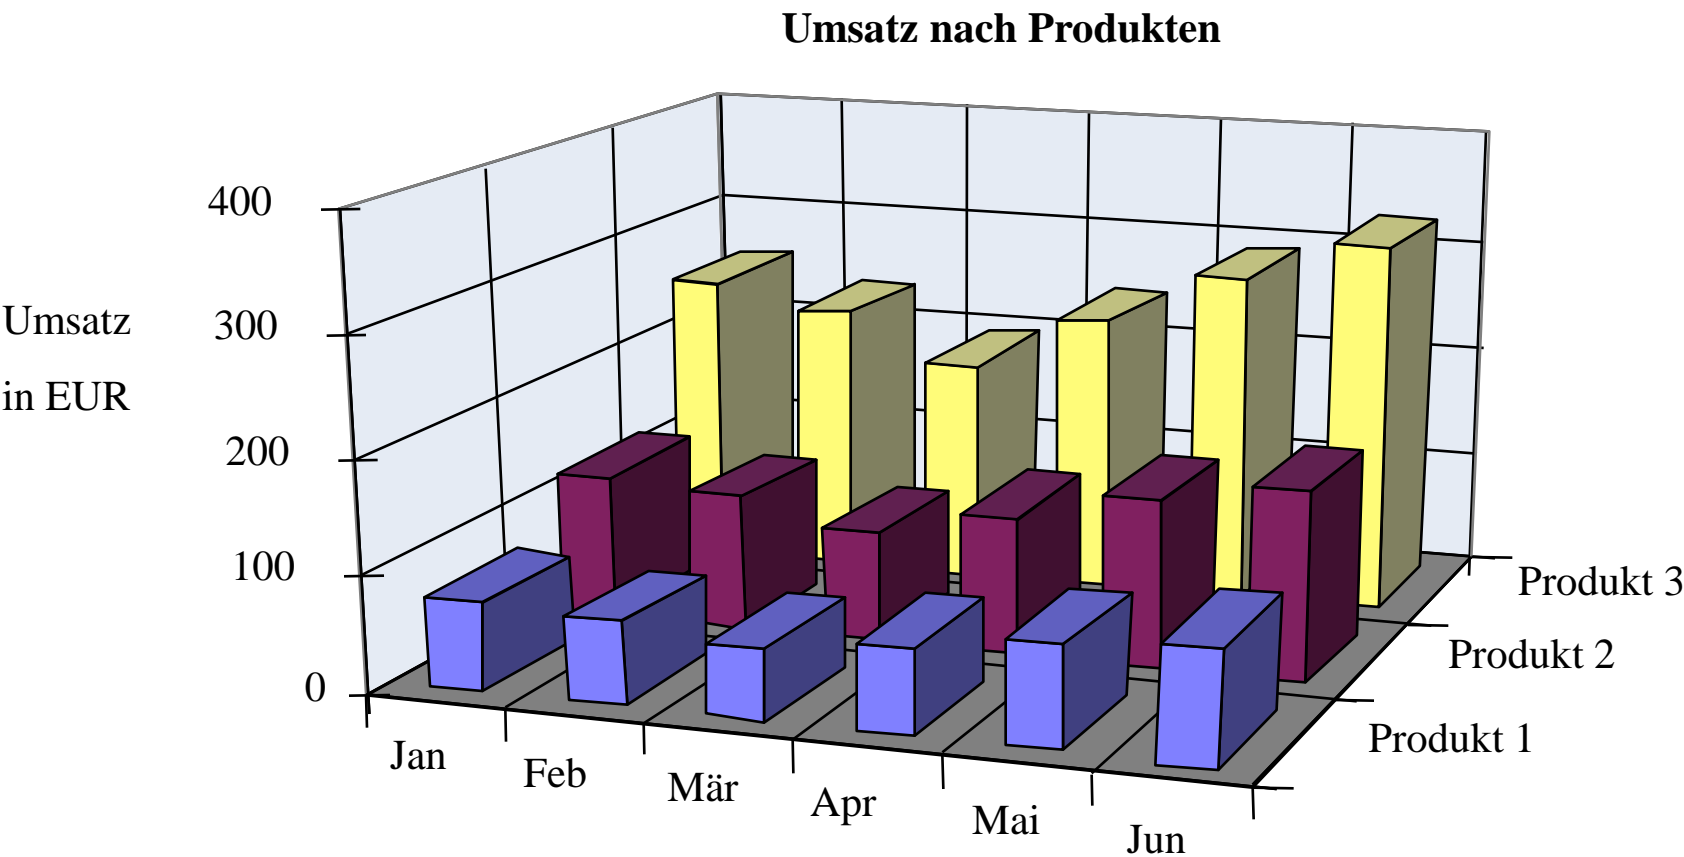

S. 677 Abb. 18

## (2) Balkendiagramm

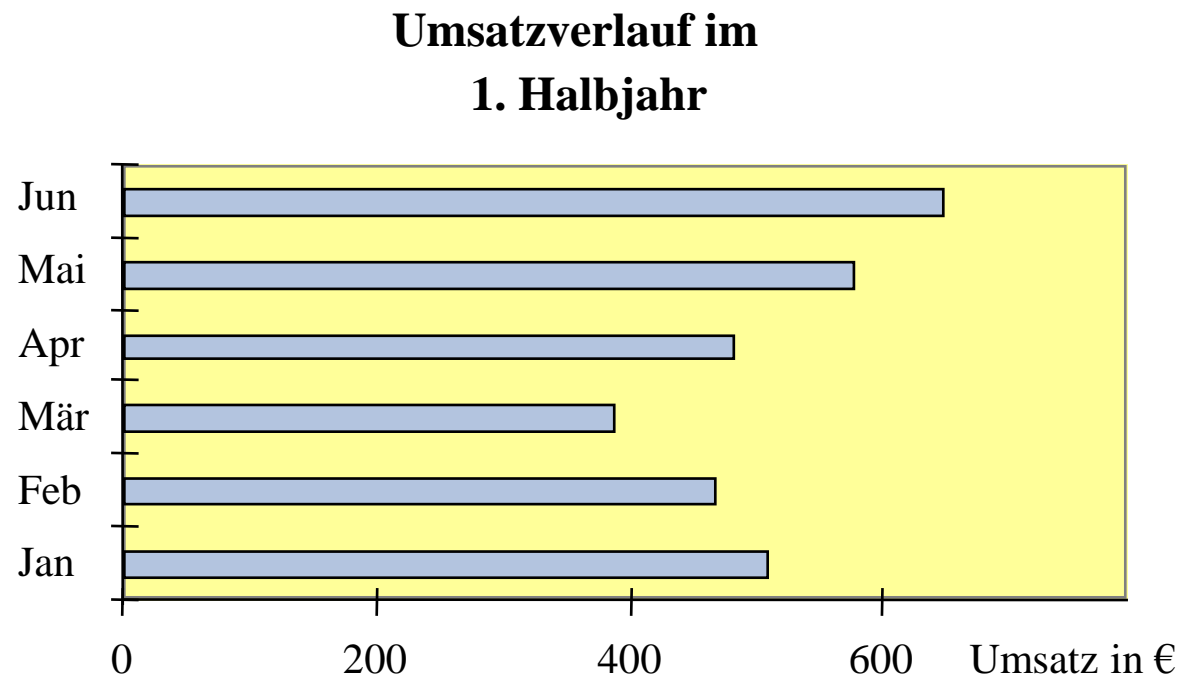

S. 678 Abb. 19

Jung, Hans: Personalwirtschaft, 9. Aufl., München 2010.

© Oldenbourg Wissenschaftsverlag



(3) Liniendiagramm

EDV-Einsatz in der Personalwirtschaft

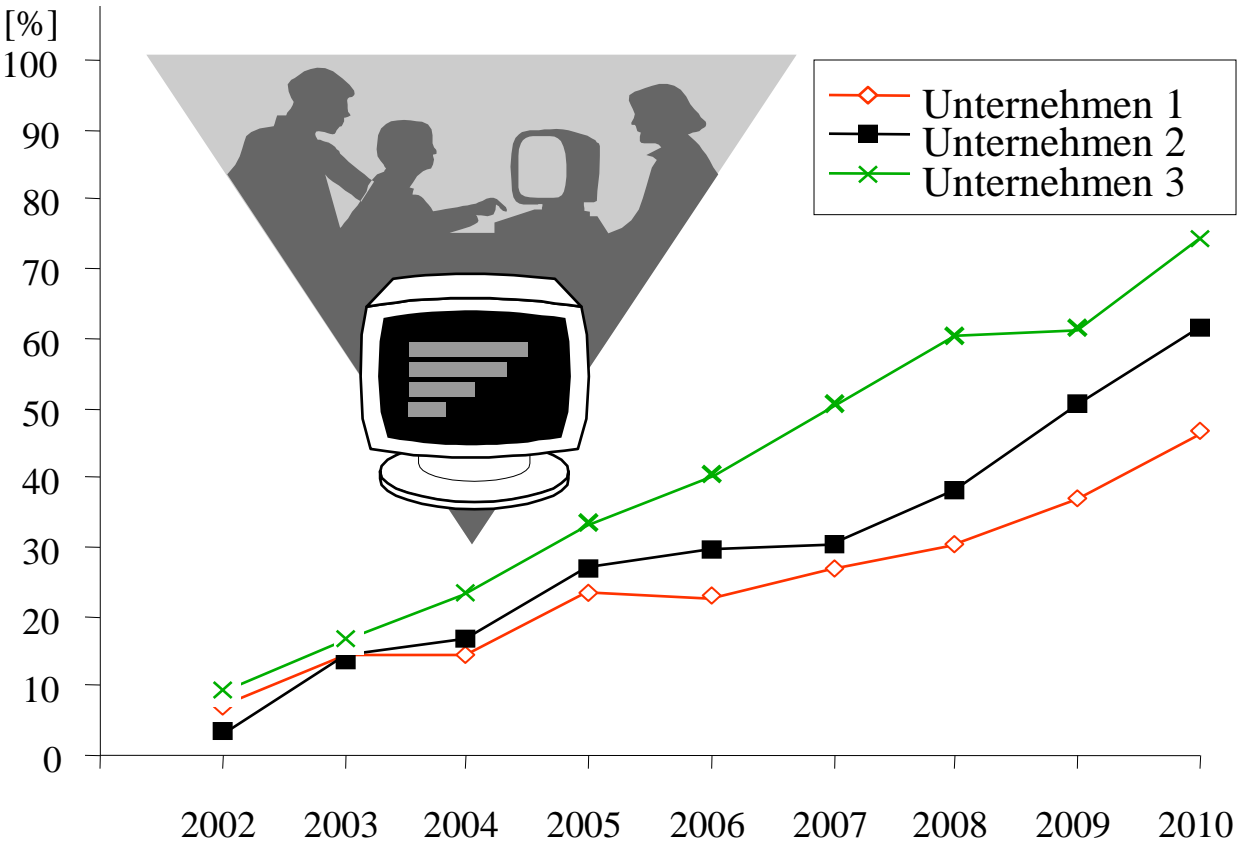

S. 678 Abb. 20



(4) Flächendiagramm

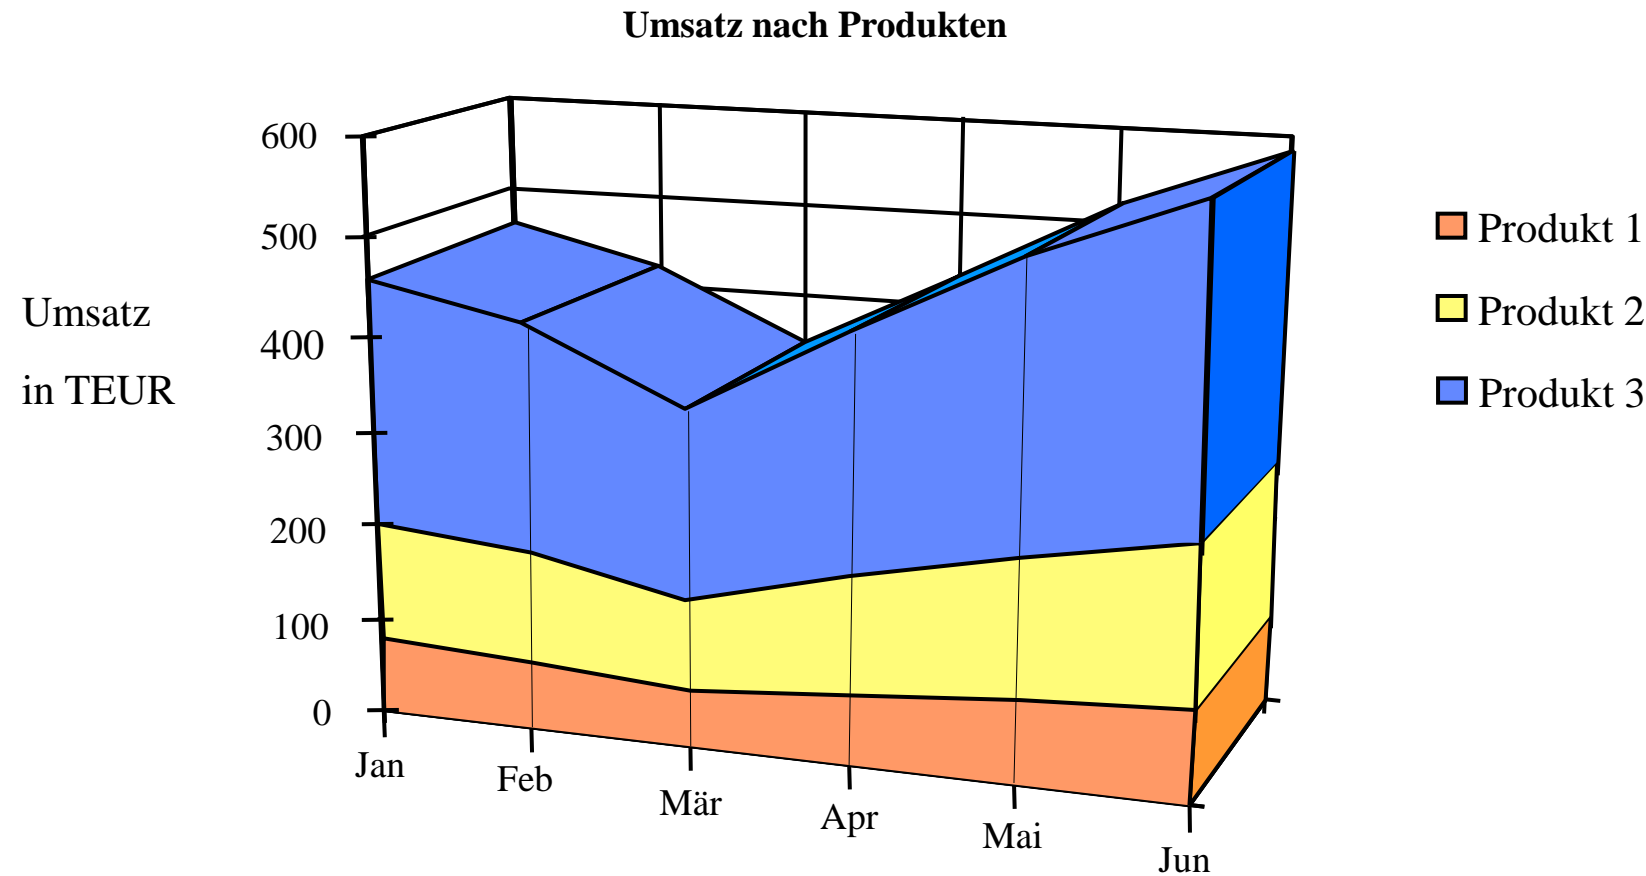

S. 679 Abb. 21

## (5) Kreisdiagramm

Umsatz im Monat Januar

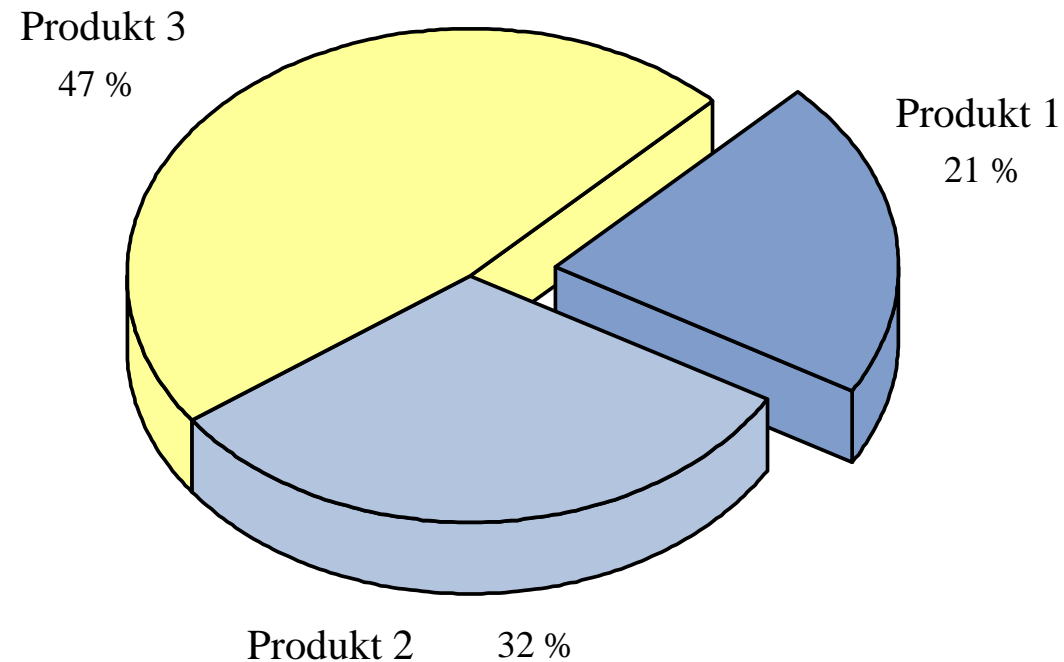

S. 679 Abb. 22

Jung, Hans: Personalwirtschaft, 9. Aufl., München 2010.

© Oldenbourg Wissenschaftsverlag

## (6) Ringdiagramm

### Umsatz im 1. Quartal

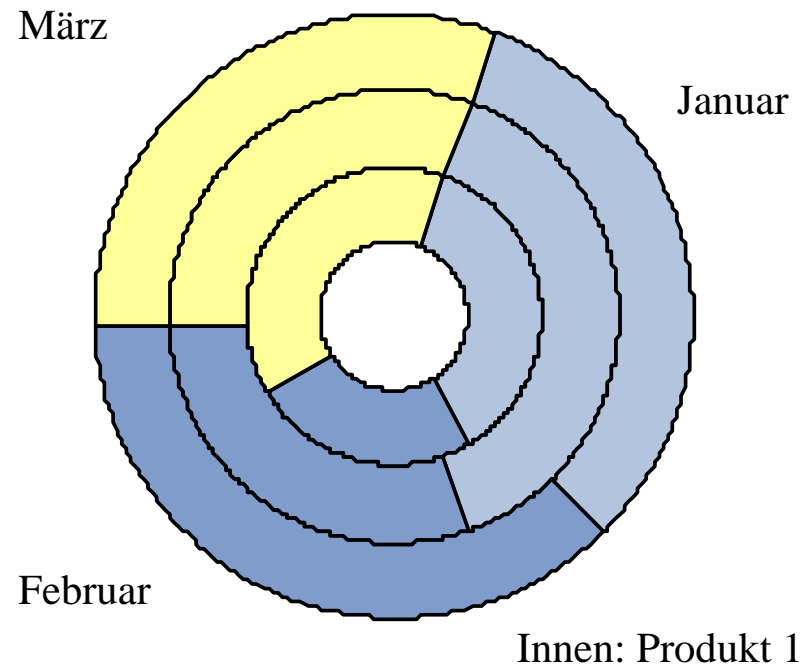

S. 680 Abb. 23

Jung, Hans: Personalwirtschaft, 9. Aufl., München 2010.

© Oldenbourg Wissenschaftsverlag

## (7) Punktdiagramm

### Personalbedarfsprognose

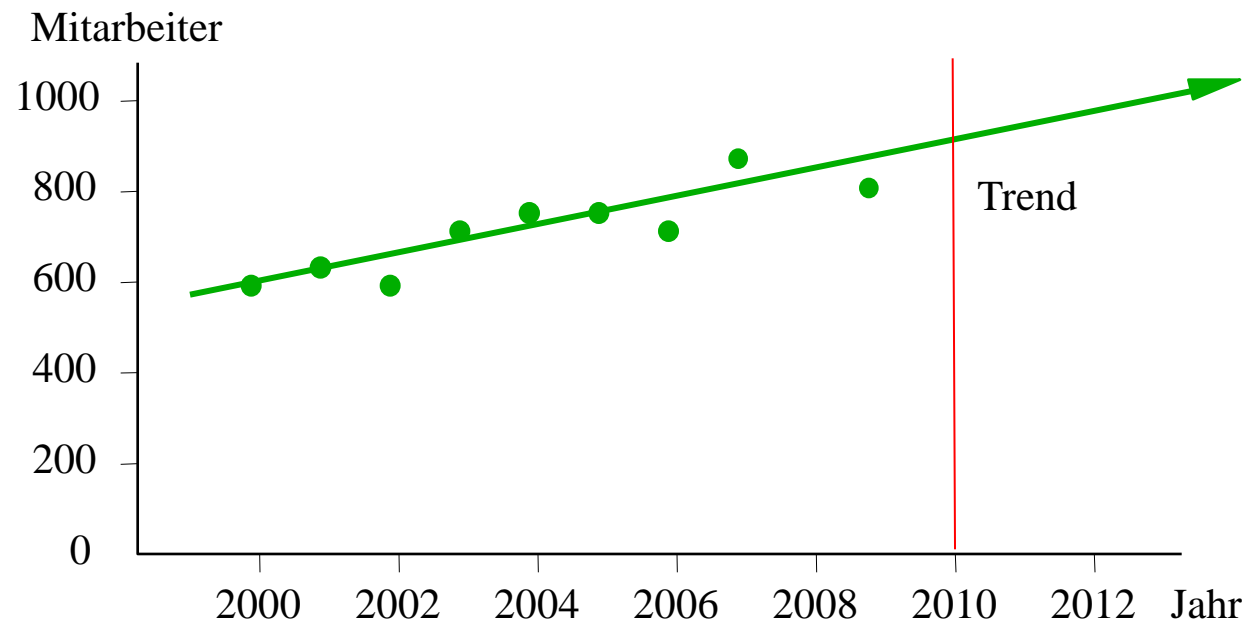

S. 680 Abb. 24



(8) Verbunddiagramm

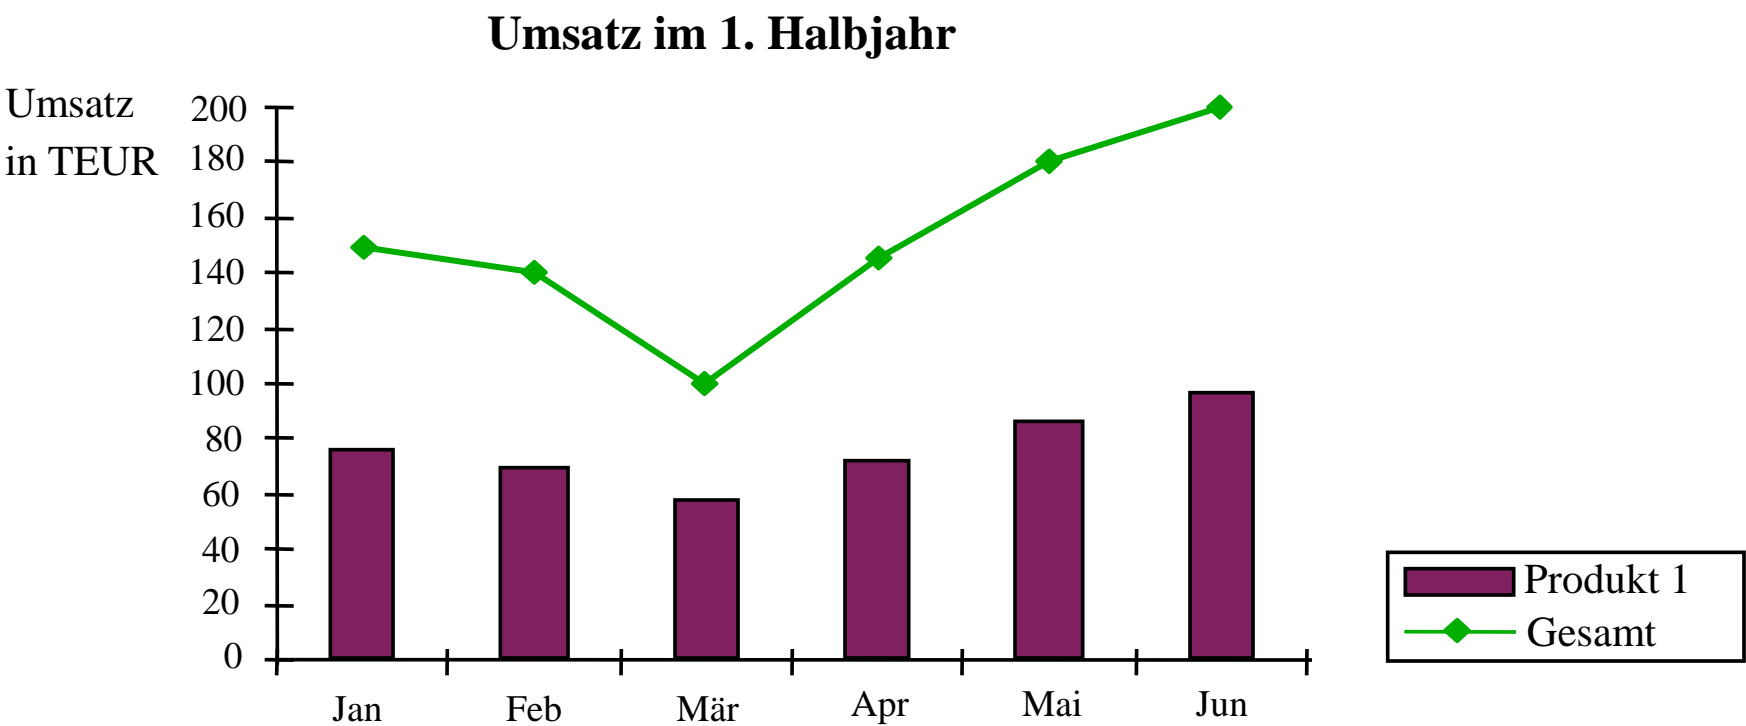

S. 681 Abb. 25



## (9) Netzdiagramm

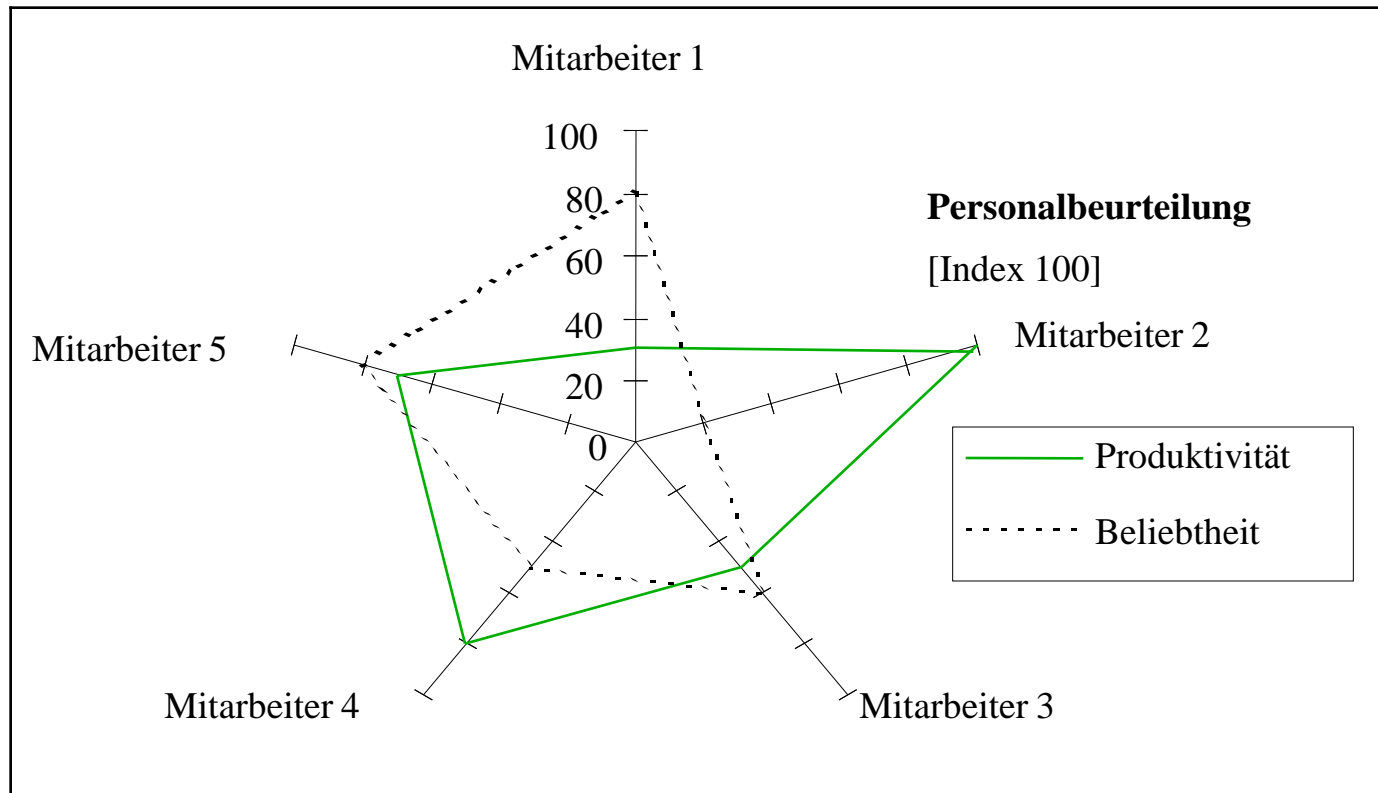

S. 681 Abb. 26

Jung, Hans: Personalwirtschaft, 9. Aufl., München 2010.

© Oldenbourg Wissenschaftsverlag



Beispiel für die jährliche Änderung der Personalstruktur eines Werkes

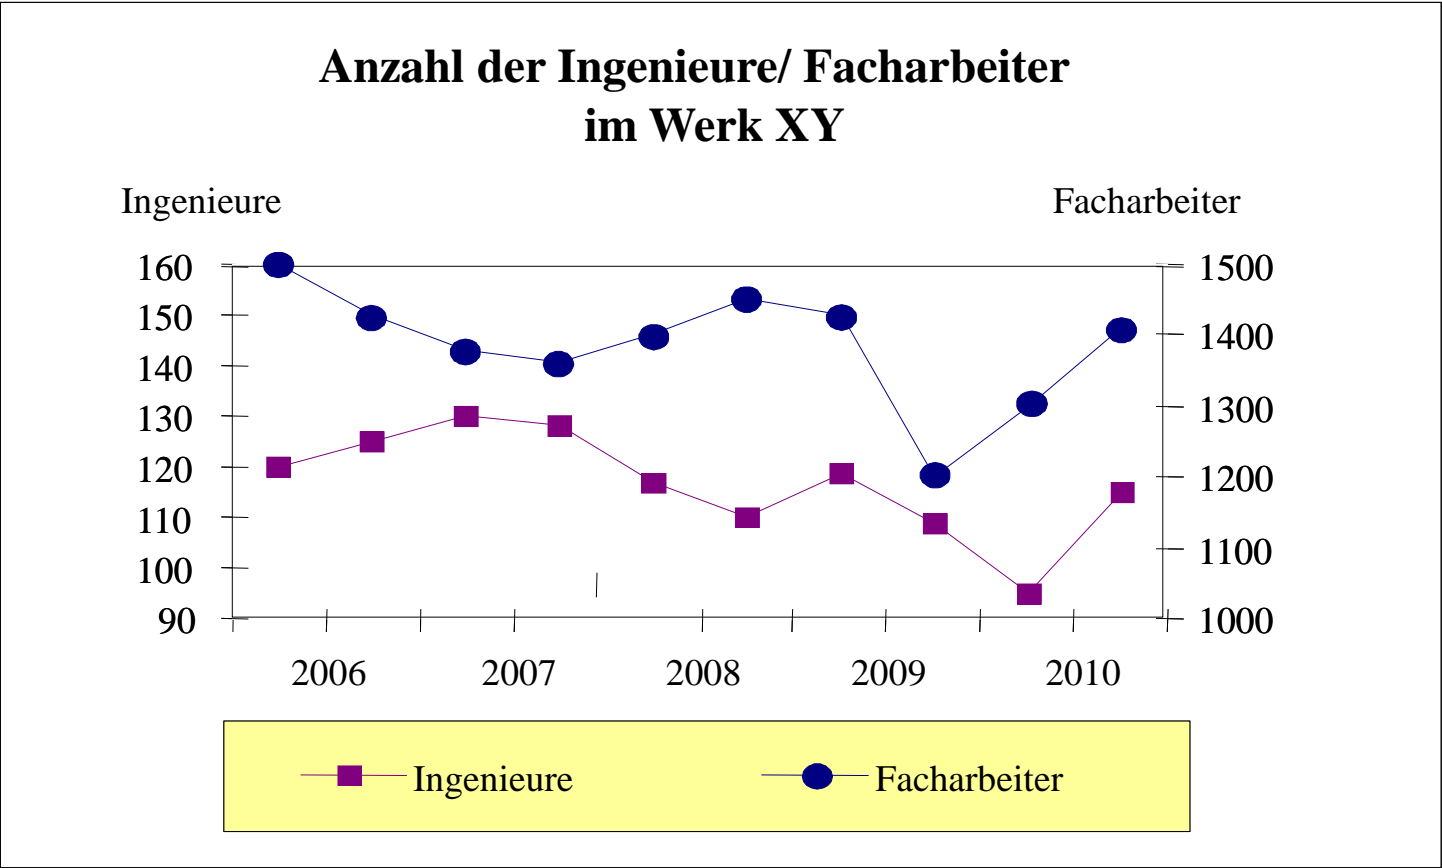

S. 683 Abb. 27



Beispiel für die Altersstruktur Mitarbeiter

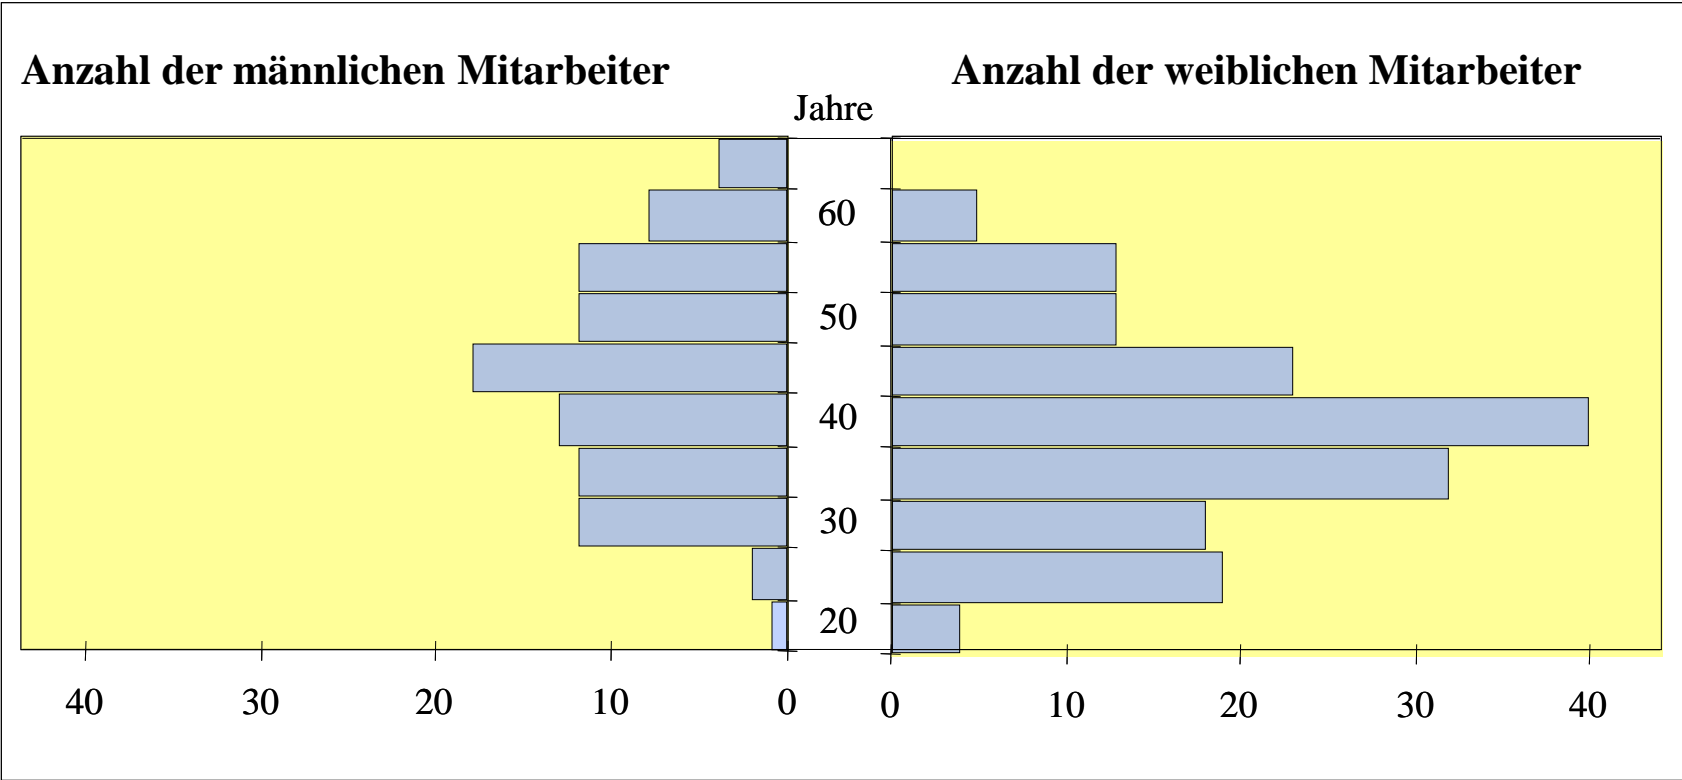

S. 684 Abb. 28



Personalbestandsänderung eines Unternehmens

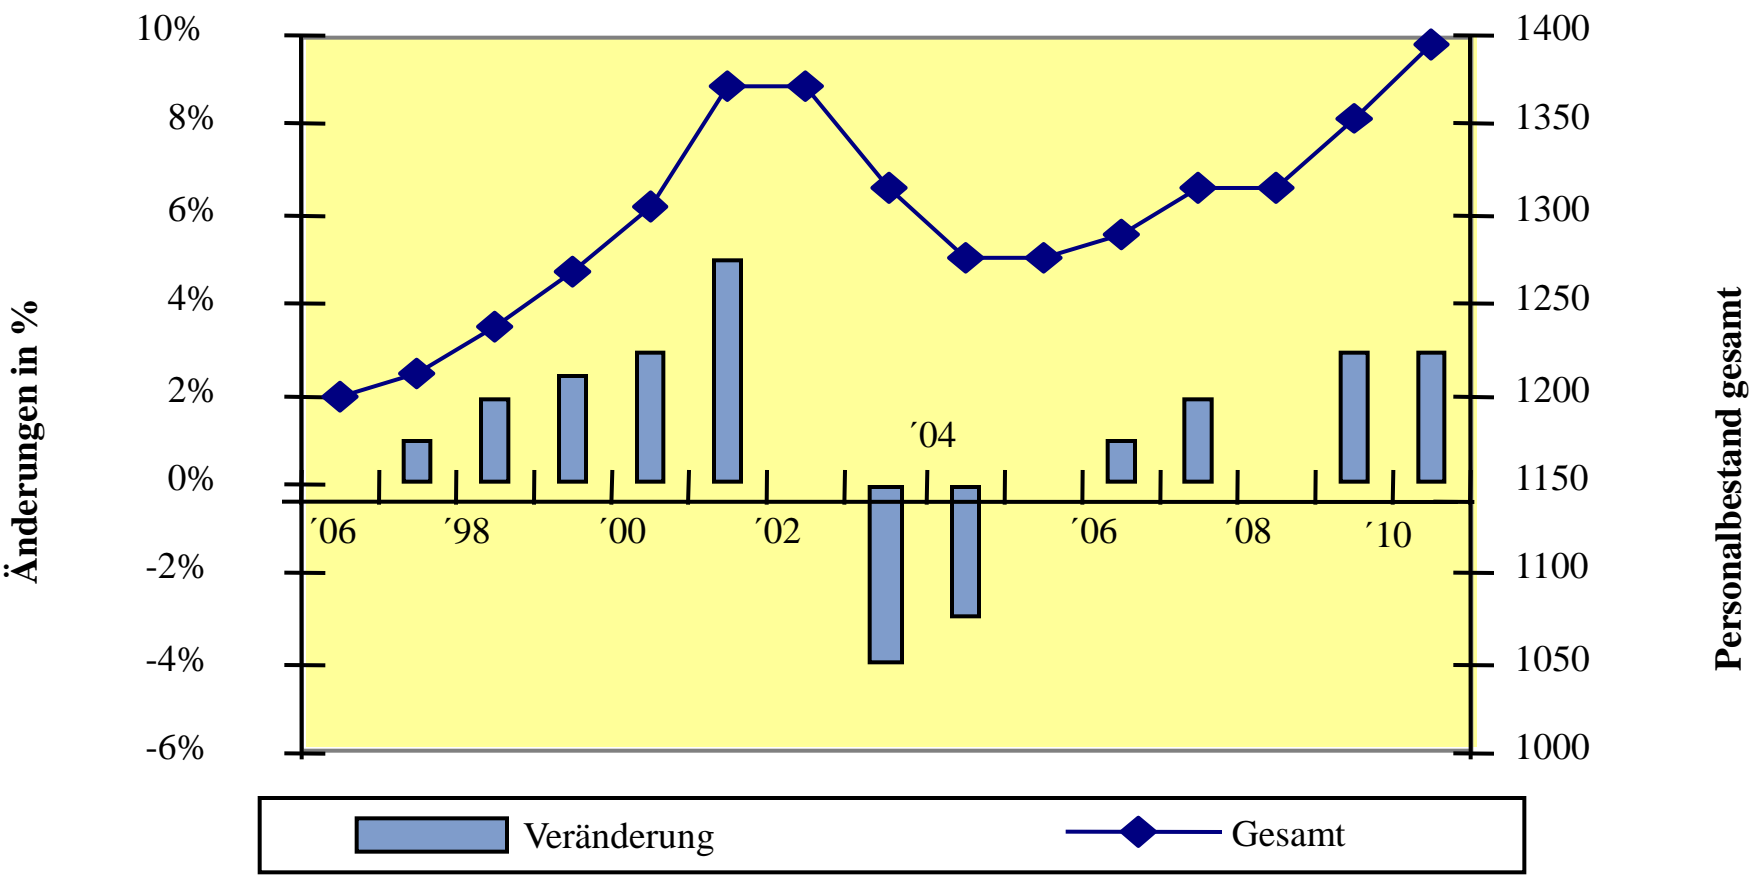

S. 685 Abb. 29



## Personalstruktur

Eine **Aufstellung der Personalstrukturstatistik** dient zur Veranschaulichung der **Zusammensetzung** der Belegschaft eines Unternehmens und kann nach folgenden Merkmalen durchgeführt werden:

- Arbeitnehmerart: Arbeiter, Angestellte, Auszubildende, Praktikanten
- Art des Vertragsverhältnisses: unbefristet/ befristet, Vollzeit/ Teilzeit
- Qualifikation: ungelernt, angelernt, gelernt
- Aufteilung nach Berufskategorien
- Dauer der Betriebszugehörigkeit
- Alter, Familienstand und Geschlecht
- Entlohnungsform: Gehalt, Lohn, Ausbildungsvergütung
- Stellung im Unternehmen: obere, mittlere, untere Führungsebene
- Funktionszuordnung: Sekretärin, Filialleiter, Disponent etc.



## Personalbewegung

Die **Personalbewegung** kann in drei verschiedene Arten unterteilt werden:

- **Außerbetriebliche Personalbewegung:** Entscheidend ist der erstmalige Eintritt in das Berufsleben bzw. das endgültige Ausscheiden. Gründe können z.B. Pensionierungen oder Todesfälle sein.
- **Zwischenbetriebliche Personalbewegung:** Sie ergibt sich durch den Wechsel von Personal zu anderen Unternehmen und wird allgemein als Fluktuation bezeichnet. Die Kündigung spielt in diesem Zusammenhang eine wichtige Rolle. Oft besteht die Schwierigkeit darin, die tatsächlichen Ursachen hierfür festzustellen.
- **Innerbetriebliche Personalbewegung:** Bei dieser Art der Personalbewegung liegen unternehmensinterne Versetzungen, Umsetzungen, Abordnungen usw. vor.

## Kennzahlen der Personalbewegung

$$\text{Fluktuationsquote} = \frac{\text{Personalabgänge} \times 100}{\text{durchschnittl. Personalbestand}} [\%]$$

$$\text{Fluktuationsquote} = \frac{\text{Personalabgänge} \times 100}{\text{Personalbestand zu Beginn} + \text{Zugänge}} [\%]$$

$$\text{Versetzungsrage (Abteilung)} = \frac{\text{Zahl der Abgänge} \times 100}{\text{durchschn. Personalbestand der Abteilung}} [\%]$$



## Personalaufwand

### (1) Globale Strukturzahlen:

$$\frac{\text{Personalkosten}}{\text{Gesamtleistung laut Gewinn und Verlustrechnung}}$$

$$\frac{\text{Entgelt (Löhne und Gehälter)}}{\text{Personalkosten gesamt}}$$

$$\frac{\text{Personalzusatzkosten}}{\text{Personalkosten gesamt}}$$

$$\frac{\text{Personalzusatzkosten aufgrund freiwilliger Leistungen}}{\text{Personalkosten gesamt}}$$





## (2) Differenzierte Strukturzahlen:

$$\frac{\text{Personalkosten Arbeiter}}{\text{Personalkosten gesamt}}$$

$$\frac{\text{Entgelt Arbeiter}}{\text{Entgelt gesamt}}$$

$$\frac{\text{Personalzusatzkosten Arbeiter}}{\text{Personalzusatzkosten gesamt}}$$

$$\frac{\text{Personalkosten Angestellte}}{\text{Personalkosten Arbeiter}}$$

$$\frac{\text{Personalzusatzkosten Angestellte}}{\text{Personalzusatzkosten Arbeiter}}$$



### (3) Leistungskennzahlen:

$$\frac{\text{Personalkosten}}{\text{Umsatz}}$$

$$\frac{\text{Personalkosten}}{\text{Produktion}}$$

$$\frac{\text{Personalkosten}}{\text{Gesamtleistung laut Gewinn- und Verlustrechnung}}$$



## Arbeitszeit

### **Vertragliche Arbeitszeit = (Soll-Arbeitszeit)**

- Ausfallzeiten (bezahlte und unbezahlte)

+ Mehrarbeitszeiten

---

**= Ist - Arbeitszeit**

### **Vertraglich vereinbarte Arbeitszeit**

- Feiertage (Wochentage)

- allgemeine bezahlte und / oder unbezahlte Freistellung

- Minderarbeitszeit durch allgemeine Umverteilung von Arbeitszeit

+ Mehrarbeitszeit

---

**= Soll - Arbeitszeit**



Die Quote der **effektiven Arbeitszeit** lässt sich aus den oben errechneten Zwischenergebnissen gewinnen, indem man die Ist-Arbeitszeit in Relation zu der Soll-Arbeitszeit setzt:

$$\text{Quote der effektiven Arbeitszeit} = \frac{\text{Ist - Arbeitszeit (Tage / Stunden)} \times 100}{\text{Soll - Arbeitszeit (Tage / Stunden)}} \quad [\%]$$



## Ausfallzeiten

$$\text{Fehlzeitenquote} = \frac{\text{Fehlzeiten (Tage / Stunden)} \times 100}{\text{Soll - Arbeitszeit (Tage / Stunden)}} [\%]$$

$$\text{Krankheitsausfallquote} = \frac{\text{Krankheitsausfall (Tage / Stunden)} \times 100}{\text{Soll - Arbeitszeit (Tage / Stunden)}} [\%]$$

$$\text{Krankenquote (je Periode)} = \frac{\text{Anzahl der Kranken} \times 100}{\text{durchschnittlicher Personalbestand}} [\%]$$

$$\text{Überstundenquote} = \frac{\text{Zahl der Überstunden} \times 100}{\text{Soll - Arbeitsstunden}} [\%]$$



## Wichtige Gründe für das Entstehen von Fehlzeiten:

- Bezahlte gesetzliche Feiertage
- Urlaub/ Sonderurlaub und Zusatzurlaub (z.B. für Schwerbehinderte)
- Bildungsurlaub, Fortbildungsmaßnahmen
- Krankheit, Kuren und Heilverfahren
- Mutterschutz und Erziehungsurlaub
- Zuspätkommen
- Betriebsstörungen/ Streik, Aussperrung
- Arbeitsbefreiungen nach Gesetz, Verordnung oder Tarif
- Bundeswehr und Wehrübungen
- Betrieblich bedingte Gründe, Betriebsversammlungen

## Die Hauptfunktionen des Personalhandbuchs

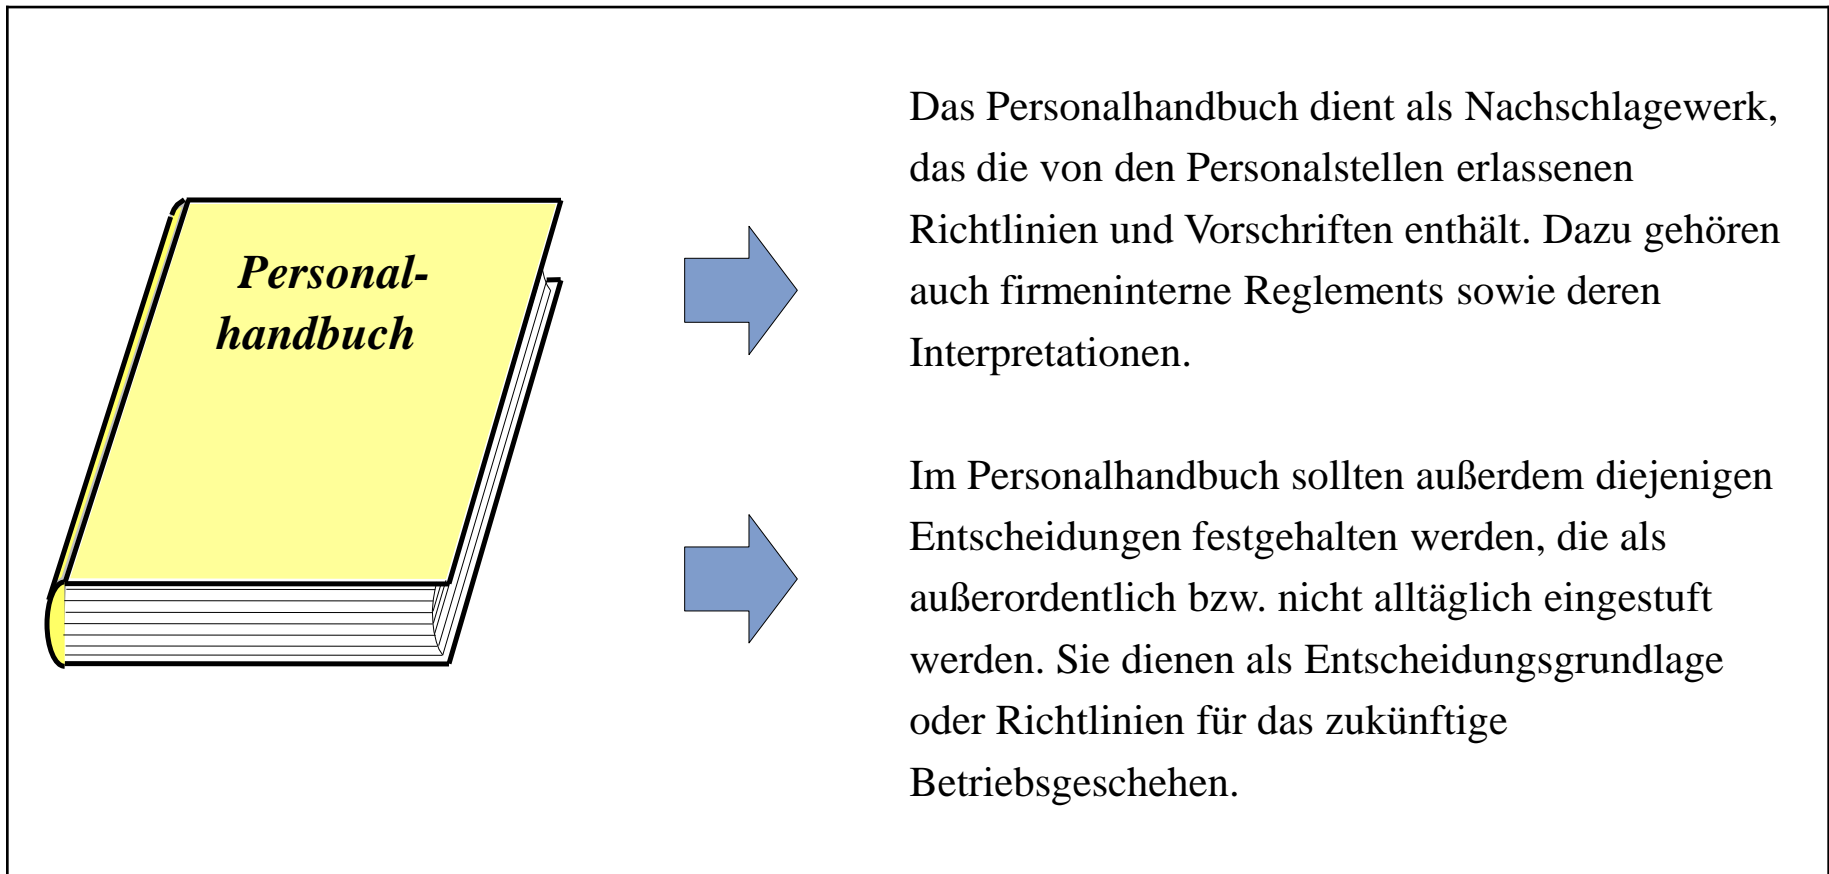

S. 690 Abb. 30

Jung, Hans: Personalwirtschaft, 9. Aufl., München 2010.

© Oldenbourg Wissenschaftsverlag



Personalhandbuch (Beispiel)

| 1. Anstellungsbedingungen                                                                                                                                                                                                                                                                                                                                                             | 2. Personaleinstellung<br>und - einatz                                                                                                                                                                                                                                                                                                                   | 3. Personelle Führung                                                                                                                                                                                                                                                                                                                  |
|---------------------------------------------------------------------------------------------------------------------------------------------------------------------------------------------------------------------------------------------------------------------------------------------------------------------------------------------------------------------------------------|----------------------------------------------------------------------------------------------------------------------------------------------------------------------------------------------------------------------------------------------------------------------------------------------------------------------------------------------------------|----------------------------------------------------------------------------------------------------------------------------------------------------------------------------------------------------------------------------------------------------------------------------------------------------------------------------------------|
| <ul style="list-style-type: none"><li>• Arbeitszeitreglement</li><li>• Überzeitregelungen</li><li>• Spesen- und Reisereglement</li><li>• Festlegung der Urlaubszeiten</li><li>• Angestelltenreglement</li><li>• Betriebsordnung</li><li>• Unterschriftenreglement</li><li>• Aushilfsanstellung</li><li>• Teilzeitanstellung</li><li>• Heimarbeit</li><li>• Auslandsverträge</li></ul> | <ul style="list-style-type: none"><li>• Auswertung von Personalstatistiken</li><li>• Personalplanung/ -werbung</li><li>• Kontakte zu Schulen</li><li>• Einholen von Auskünften und Gutachten</li><li>• Vorstellungsspesen</li><li>• Personalauswahl</li><li>• Einführung neuer MA</li><li>• Beratungsverträge</li><li>• Probezeit/Versetzungen</li></ul> | <ul style="list-style-type: none"><li>• Führungsrichtlinien</li><li>• Aufgaben und Pflichten für Vorgesetzte</li><li>• Organigramm</li><li>• Funktionsdiagramme</li><li>• Stellenbeschreibungen</li><li>• Personalpolitik</li><li>• Zielsetzungsprozess</li><li>• Nachwuchsplanung</li><li>• Förderung</li><li>• Information</li></ul> |

S. 691 Abb. 31 A





(Fortsetzung)

| 4. Entgeltpolitik                                                                                                                                                                                               | 5. Aus- und Weiterbildung                                                                                                                                                                                                                                                   | 6. Soziales und Dienstleistungen                                                                                                                                                                                                                                                                     |
|-----------------------------------------------------------------------------------------------------------------------------------------------------------------------------------------------------------------|-----------------------------------------------------------------------------------------------------------------------------------------------------------------------------------------------------------------------------------------------------------------------------|------------------------------------------------------------------------------------------------------------------------------------------------------------------------------------------------------------------------------------------------------------------------------------------------------|
| <ul style="list-style-type: none"><li>• Qualifikationsgespräch</li><li>• Mitarbeiterbeurteilung</li><li>• Arbeitsplatzbewertung</li><li>• Lohnfindung</li><li>• Gratifikationen</li><li>• Bonussystem</li></ul> | <ul style="list-style-type: none"><li>• Ermittlung d. Schulungsbedarfs</li><li>• Interne/Externe Ausbildung</li><li>• Persönliche Weiterbildung</li><li>• Nachwuchskräfte-schulung</li><li>• Sprach-, Lehrlingsausbildung</li><li>• Anlernen</li><li>• Stipendien</li></ul> | <ul style="list-style-type: none"><li>• Altersvorsorge</li><li>• Krankenversicherung</li><li>• Gesundheitsvorsorge</li><li>• Finanzielle Unterstützung</li><li>• Sozialberatung/Freizeitkurse</li><li>• Dienstjubiläen; Rechtsberatung</li><li>• Vorschlagswesen</li><li>• Unfallverhütung</li></ul> |

| 7. Beendigung des Arbeitsverhältnisses                                                                                |
|-----------------------------------------------------------------------------------------------------------------------|
| <ul style="list-style-type: none"><li>• Pensionierung/Kündigung</li><li>• Austrittsformalitäten; Todesfälle</li></ul> |

S. 691 Abb. 31B



| <b>Personalbogen</b>                                                                                                                |  |
|-------------------------------------------------------------------------------------------------------------------------------------|--|
| Bitte innerhalb von 2 Wochen nach Erhalt bei der Personalabteilung einreichen                                                       |  |
| <b>A. Personalien</b>                                                                                                               |  |
| Name, Vorname:<br>Geburtsname:<br>Geburtsdatum, Ort, Kreis:<br>Familienstand:<br>Staatsangehörigkeit:<br>Religion:<br>Steuerklasse: |  |
| <b>B. Wohnung</b>                                                                                                                   |  |
| Straße:<br>Ort:<br>Tel.-Nummer:                                                                                                     |  |
| <b>C. Ausbildung</b>                                                                                                                |  |
| 1. Schulabschluss:<br>2. Berufsausbildung:<br>3. Hochschulabschluss:                                                                |  |
| <b>D. Bankverbindung</b>                                                                                                            |  |
| BLZ:<br>Name und Ort des Institutes:<br>Konto-Nr.:                                                                                  |  |

S. 692 Abb. 32



**DAMEN- UND KINDERBEKLEIDUNG**

Klaus S. GmbH & Co Postfach 250320 49256 Dortmund

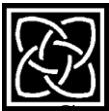

**Klaus S.**

Adressfeld

Ihr Zeichen

Ihre Nachricht

Unser Zeichen Tag

Datum

Ihre Bewerbung vom Datum der Bewerbung

Sehr geehrte variable Anrede

vielen Dank für Ihre Bewerbung vom Datum, mit der Sie sich um einen Semesterferien-Arbeitsplatz in unserem Hause bewerben. Leider müssen wir Ihnen mitteilen, dass wir aus der Vielzahl der eingegangenen Bewerbungen die zur Verfügung stehenden Arbeitsplätze bereits besetzt haben. Wir bedauern, Ihnen einen abschlägigen Bescheid geben zu müssen, reichen Ihre Bewerbungsunterlagen als Anlage zurück und verbleiben

mit freundlichen Grüßen  
Klaus S. GmbH & Co.

  
Ralph Grimm

S. 693 Abb. 33



## Notizen

## 3. Personalinformationssysteme (PIS)

- 3.1 Historische Entwicklung
- 3.2 Grundlegende Begriffe der Datenverarbeitung
- 3.3 Verarbeitung und Auswertung von Personaldaten
- 3.4 Anforderungen an ein Personalinformationssystem
- 3.5 Administrative und dispositive Aufgaben eines Personalinformationssystems
- 3.6 Aufbau eines Personalinformationssystems
- 3.7 Arten der betrieblichen Datenerfassung
- 3.8 Implementierung von Personalinformationssystemen
- 3.9 Künstliche Intelligenz bei Personalinformationssystemen
- 3.10 Einsatzgebiete eines Personalinformationssystems

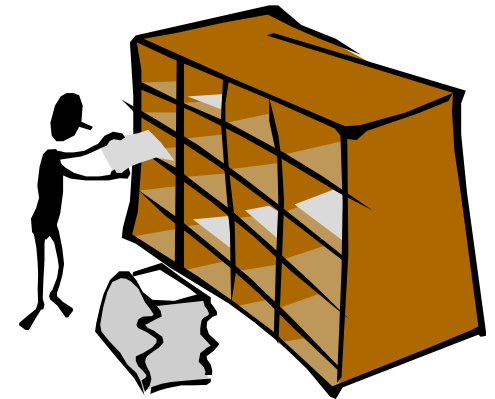

## Grundlegende Begriffe der Datenverarbeitung

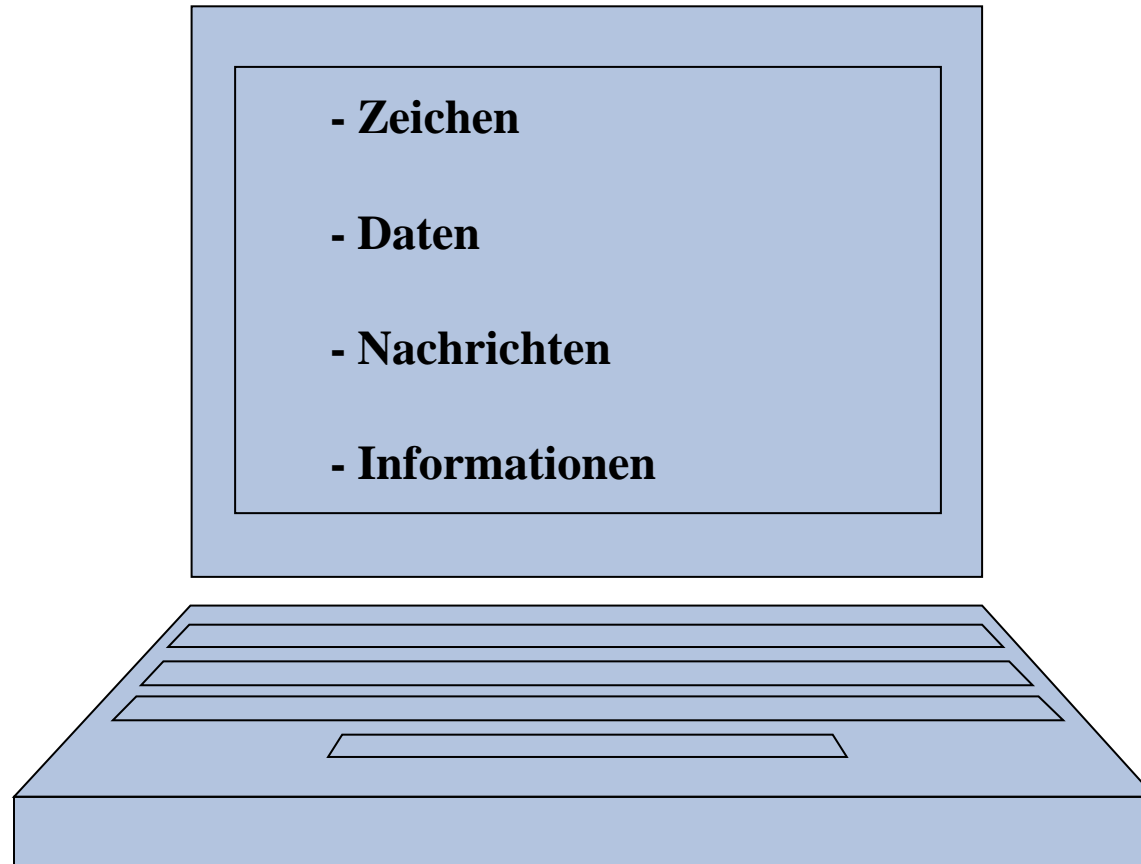

S. 695 ff.

Jung, Hans: Personalwirtschaft, 9. Aufl., München 2010.

© Oldenbourg Wissenschaftsverlag



## Zeichen

- Als Zeichen werden Elemente bezeichnet, aus denen Daten, Nachrichten bzw. Informationen zusammengesetzt sind. Zeichen können sowohl als Buchstaben oder Ziffern als auch als Sonderzeichen oder mathematische Symbole auftreten. Zeichen haben beliebige Erscheinungsformen und sind an keine Erscheinungsformen gebunden.

## Daten

- Erfolgt eine Sinngebung und Fixierung von Zeichen, so werden sie als Daten bezeichnet. Daten bestehen danach in der Regel aus einer Kombination von Zeichen. Hierbei wird eine bestimmte Erscheinungsform verabredet, damit diese Zeichenkombination eine interpretierbare Bedeutung erlangt.

## Zusammenhang zwischen Zeichen und Daten

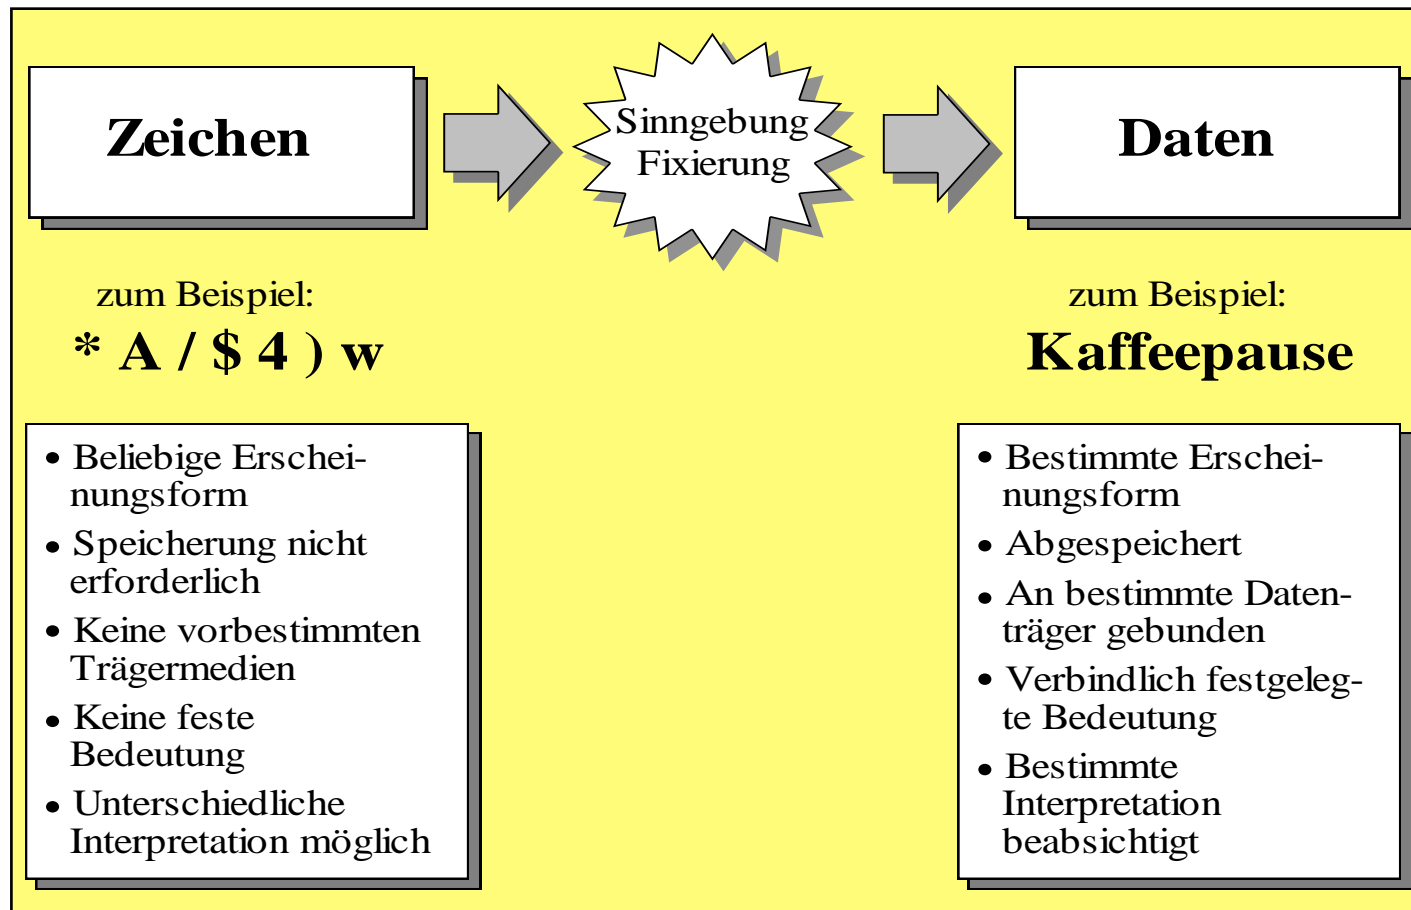

S. 696 Abb. 34





## **Nachrichten**

- Unter einer Nachricht wird gewöhnlich eine schriftliche oder mündliche Mitteilung über einen bestimmten Sachverhalt verstanden. Ob der Inhalt der Nachricht neu oder veraltet, wichtig oder unwichtig, falsch oder richtig ist spielt hierbei keine Rolle.

## **Informationen**

- Informationen werden häufig als zweckorientiertes Wissen bezeichnet. Der Hauptunterschied gegenüber einer Nachricht besteht einerseits in der Früherkennung der Erhöhung des Wissenstandes des Nachrichtenempfängers.



## Informationsarten

- **Sachinformationen** beziehen sich unmittelbar auf den Gegenstand der Aufgabendurchführung.
- **Planungs- bzw. Steuerungsinformationen** regeln die Art der Aufgabendurchführung. Sie sind in Plänen, Ausführungsbestimmungen, Anweisungen oder Dienstvorschriften enthalten, die entweder den allgemeinen Ordnungsrahmen oder aber ganz spezielle Bedingungen für den Arbeitsablauf festlegen.
- **Prognosevorgaben und Kontrollinformationen** werden nach den Phasen des Entstehungsprozesses (Planung, Realisation, Kontrolle) unterschieden.
- **Interne und externe Informationen** sind in ihrer Herkunft festgelegt.
- Informationen können sich je nach Empfängerkreis entweder an den **Innen-** oder an den **Außenbereich** richten.



## Belege

- Informationen werden in eine übersichtliche Ordnung gebracht.
- Alle Bestandteile des Arbeitsablaufs werden berücksichtigt.
- Ein Teil der Denkarbeit wird dem Bearbeiter abgenommen.
- Der gesamte Arbeitsablauf wird gesteuert
- Es erfolgt eine Entlastung von Schreibarbeit
- Sprache und Begriffe für den entsprechenden Anwendungsbereich werden geregelt.

## Schema des Informationsflusses

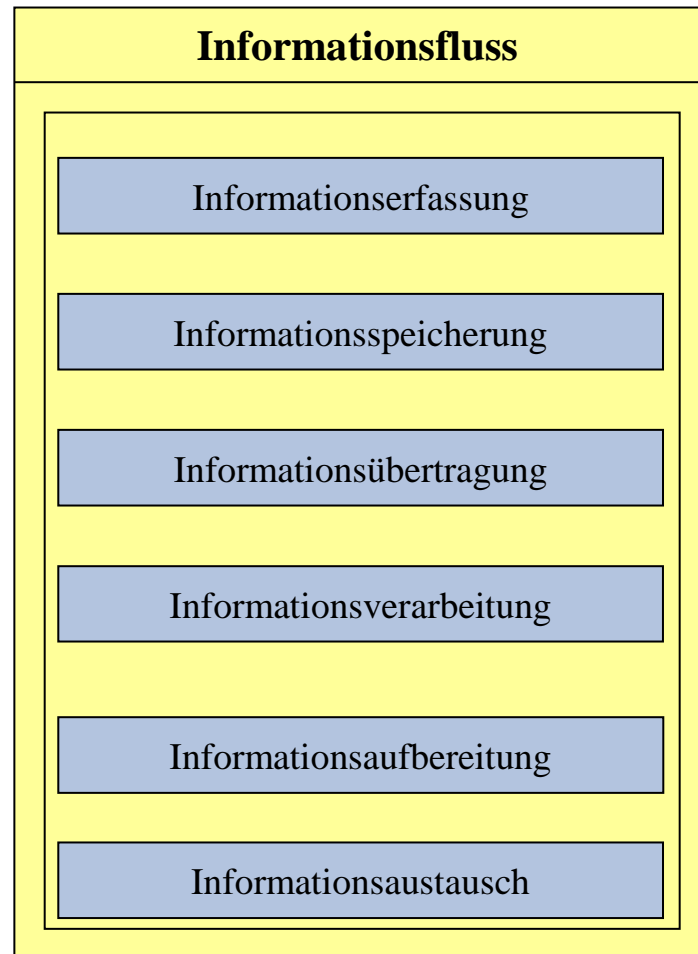

S. 699 Abb. 35



Datenflussplan

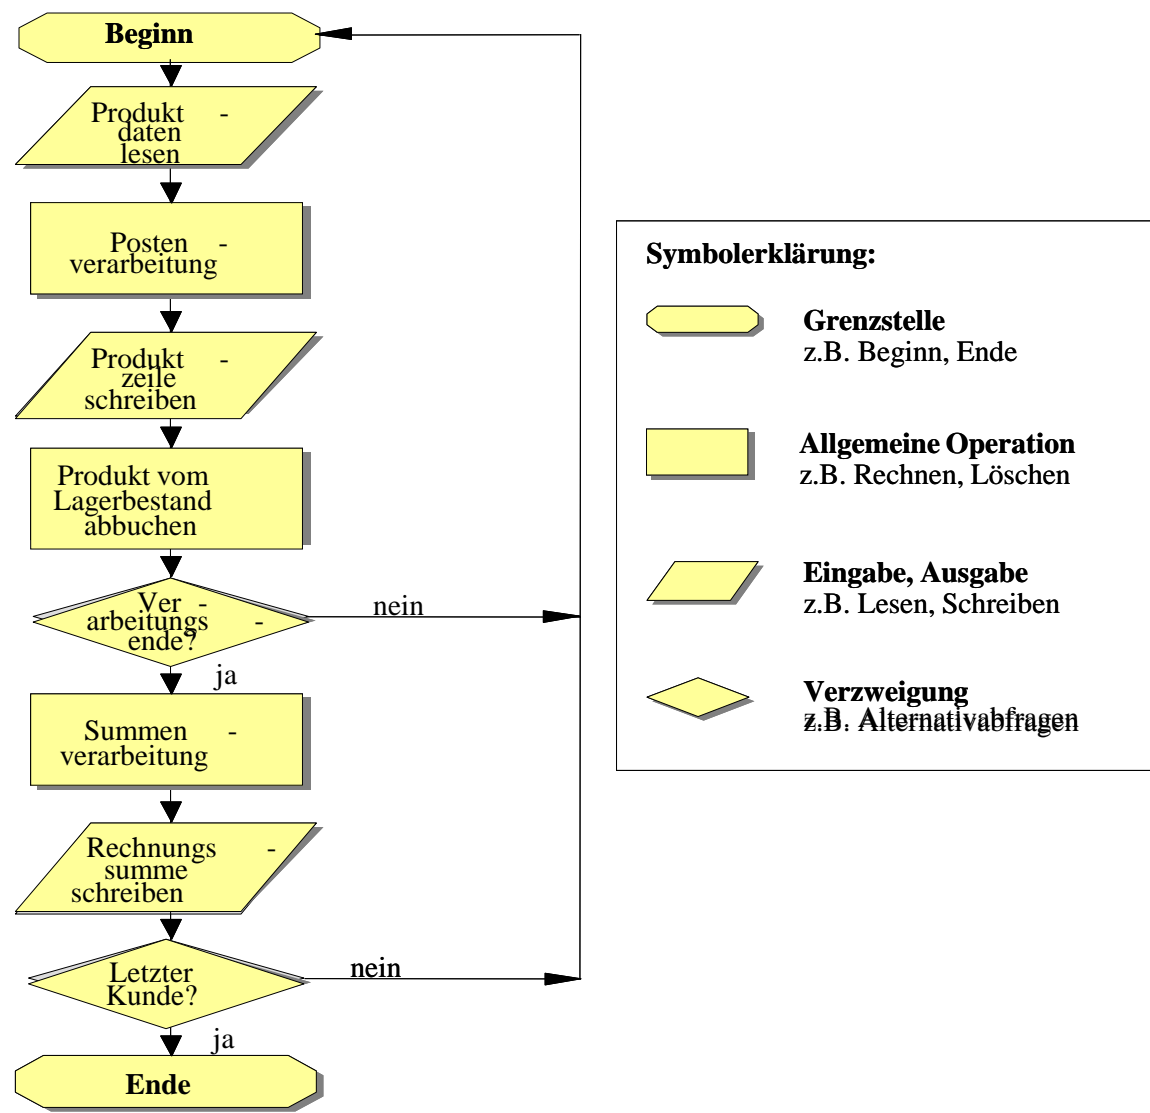

S. 700 Abb. 36

## Verarbeitung und Auswertung von Personaldaten

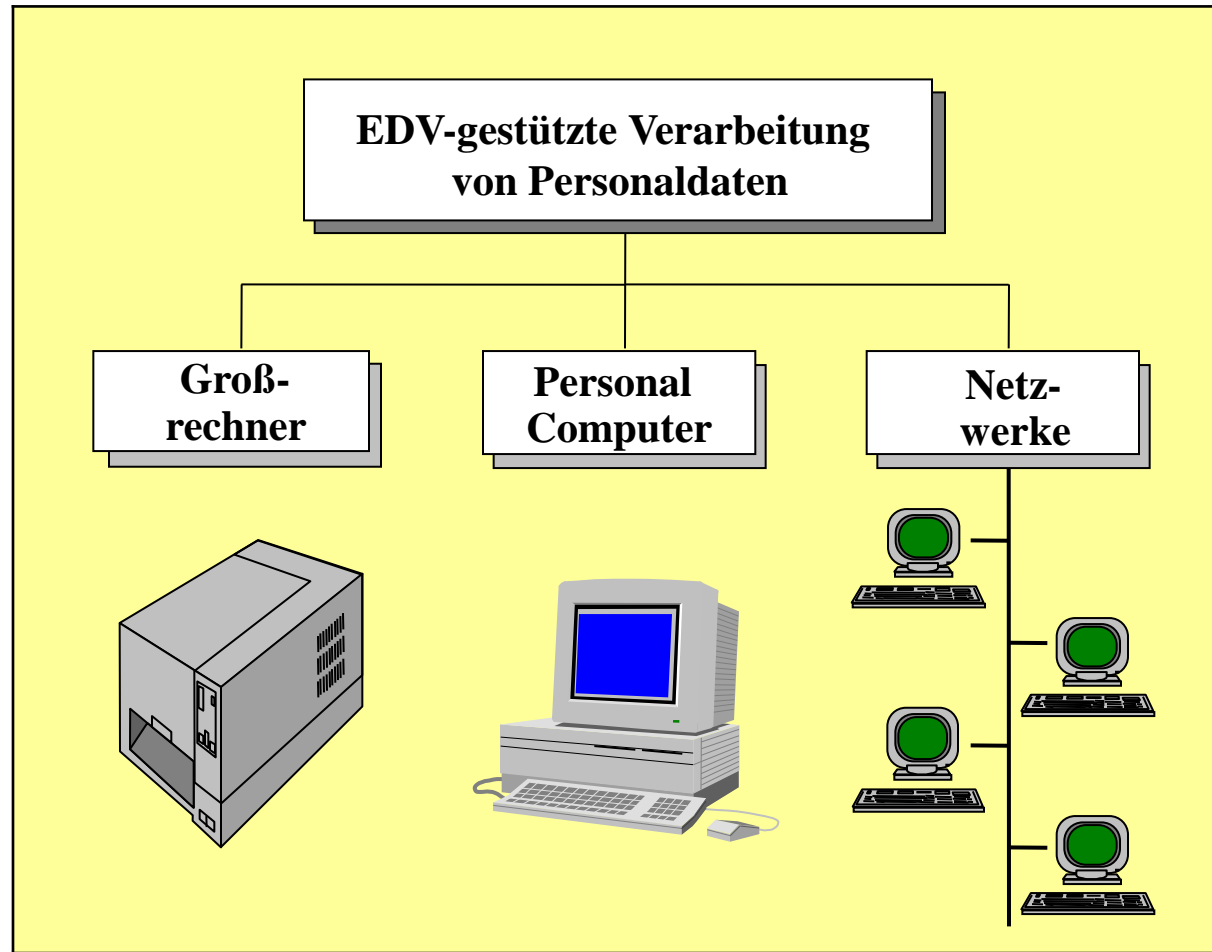

S. 701 Abb. 37

Jung, Hans: Personalwirtschaft, 9. Aufl., München 2010.

© Oldenbourg Wissenschaftsverlag



## Verarbeitung und Auswertung von Personaldaten

- **Aufbau einer EDV-Anlage**
- **Großrechner**
- **Personalcomputer**
- **Netzwerke**
- **Datenträger**
- **Datenbanksysteme**

S. 701 ff.

Jung, Hans: Personalwirtschaft, 9. Aufl., München 2010.

© Oldenbourg Wissenschaftsverlag

## Typische PC-Einsatzgebiete in der Personalwirtschaft sind:

- Graphische Aufbereitung
- Datenbankrecherche
- Reisekostenabrechnung
- Urlaubs-, Jubiläums-, Schulungs- und Führungskräftekarteen
- Stellenpläne
- Terminverfolgung für die Personalverwaltung
- Fehlzeitenverwaltung und –auswertung
- Statistikerstellung
- Beurteilungssystem
- Bewerberauswahl



## Zusammenstellung der wichtigsten Rechnernetze bezüglich ihrer Dimension

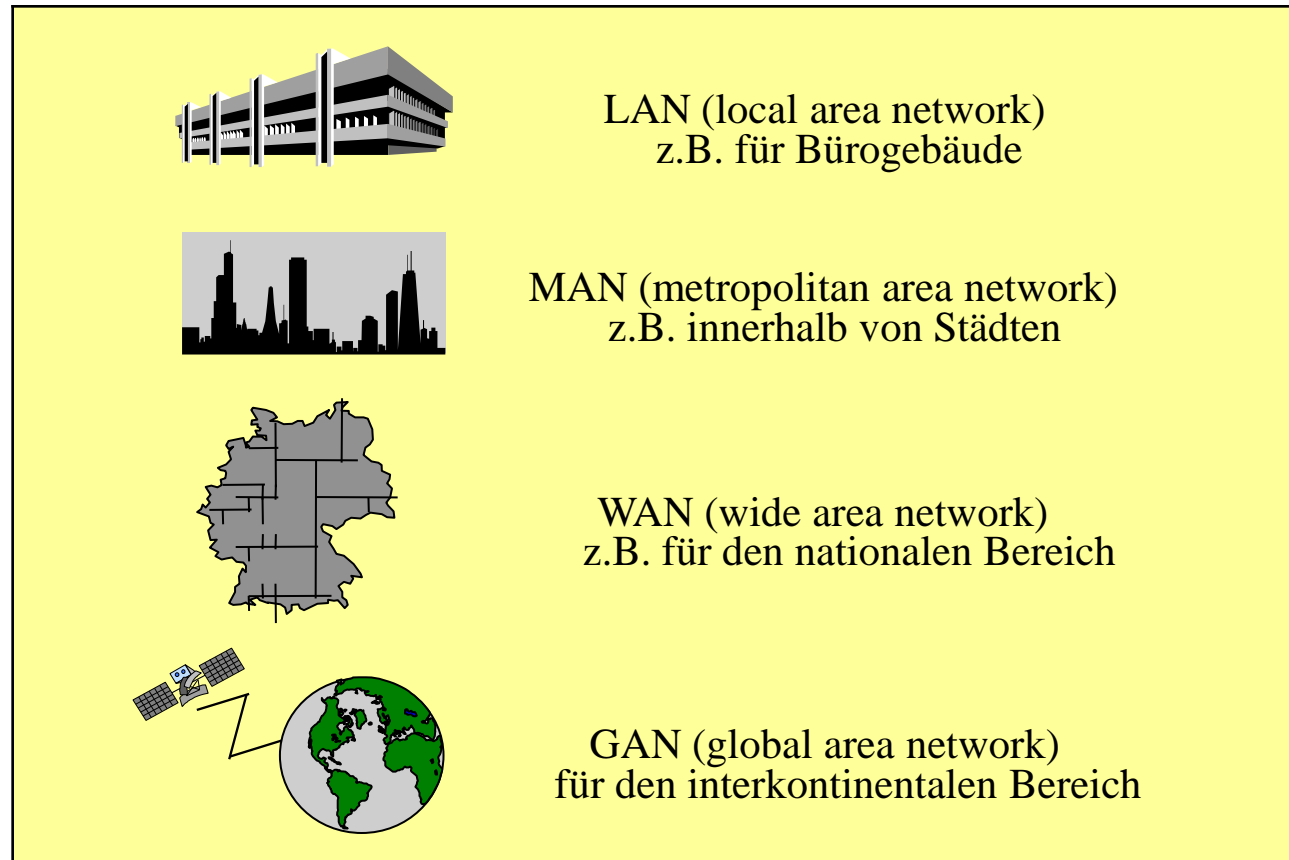

S. 703 Abb. 38



# Übersicht der gebräuchlichsten Datenträgerarten

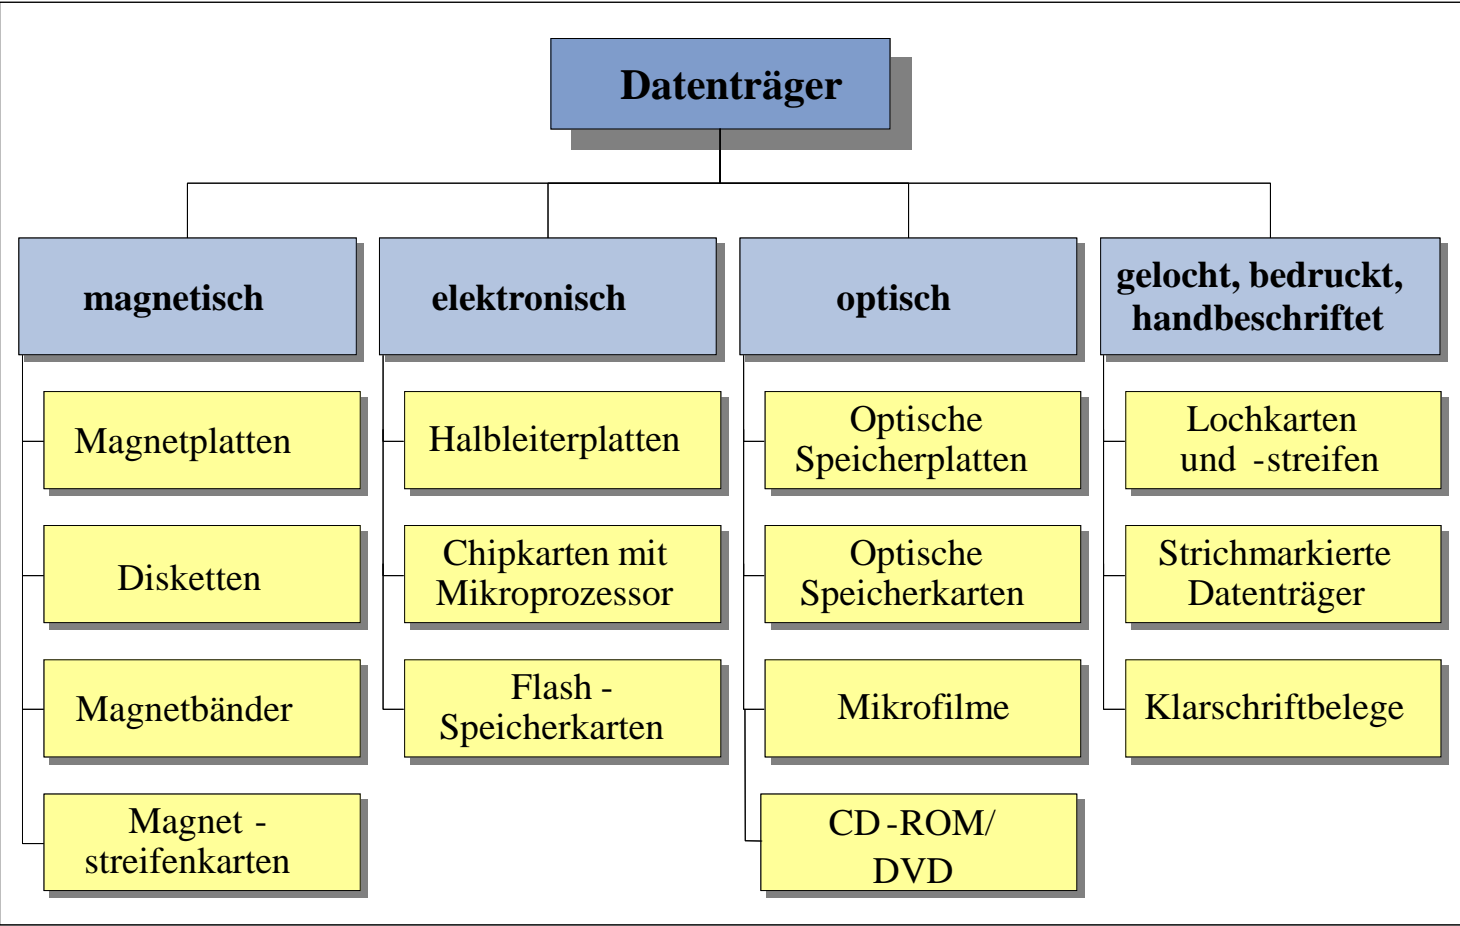

S. 704 Abb. 39

## Schematische Gliederung einer Personaldatenbank

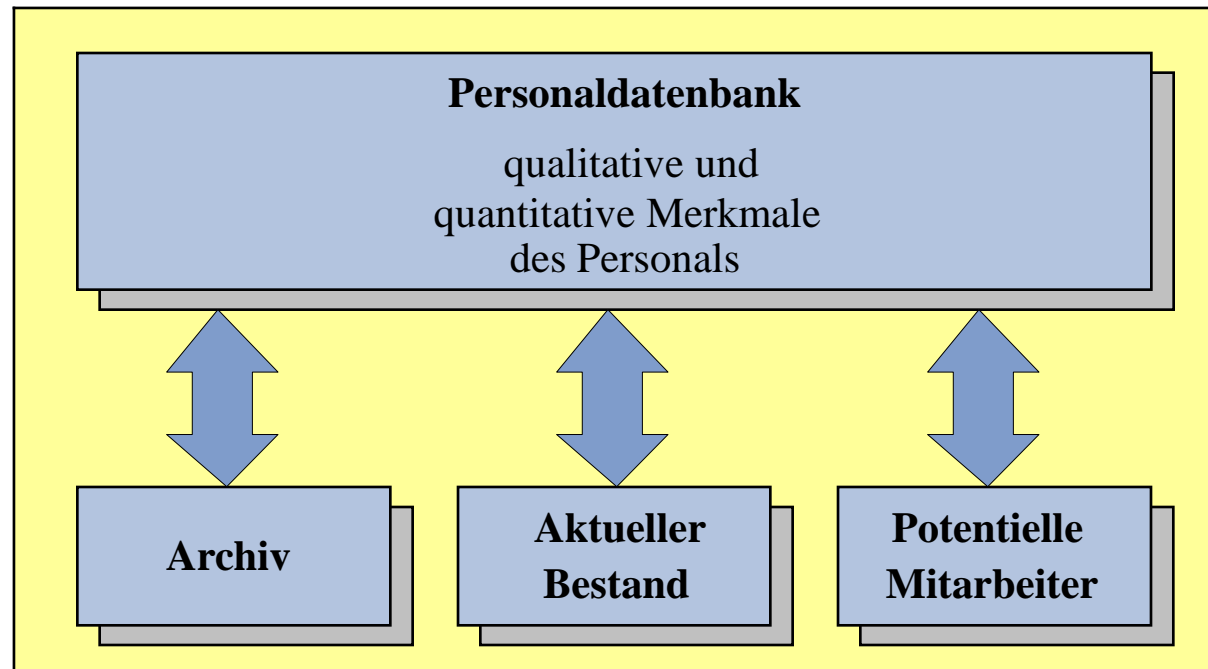

S. 705 Abb. 40

Jung, Hans: Personalwirtschaft, 9. Aufl., München 2010.

© Oldenbourg Wissenschaftsverlag



| <b>Persönlichkeits- und Arbeitsmerkmale eines Mitarbeiters</b> |
|----------------------------------------------------------------|
| 1. Allgemeine Merkmale                                         |
| 2. Kenntnis- und Einsatzmerkmale                               |
| 3. Physische Merkmale                                          |
| 4. Psychische Merkmale                                         |
| 5. Abrechnungsmerkmale                                         |



Unterteilung der Datensätze in Datenelemente

|             |      |                |               |         |                     |       |
|-------------|------|----------------|---------------|---------|---------------------|-------|
| Id.-<br>Nr. | Name | Geb.-<br>datum | Qualifikation | Adresse | Eintritts-<br>datum | ..... |
|-------------|------|----------------|---------------|---------|---------------------|-------|

|             |      |                |               |         |                     |       |
|-------------|------|----------------|---------------|---------|---------------------|-------|
| Id.-<br>Nr. | Name | Geb.-<br>datum | Qualifikation | Adresse | Eintritts-<br>datum | ..... |
|-------------|------|----------------|---------------|---------|---------------------|-------|

|             |      |                |               |         |                     |       |
|-------------|------|----------------|---------------|---------|---------------------|-------|
| Id.-<br>Nr. | Name | Geb.-<br>datum | Qualifikation | Adresse | Eintritts-<br>datum | ..... |
|-------------|------|----------------|---------------|---------|---------------------|-------|



Anforderungen an ein  
Personalinformationssystem

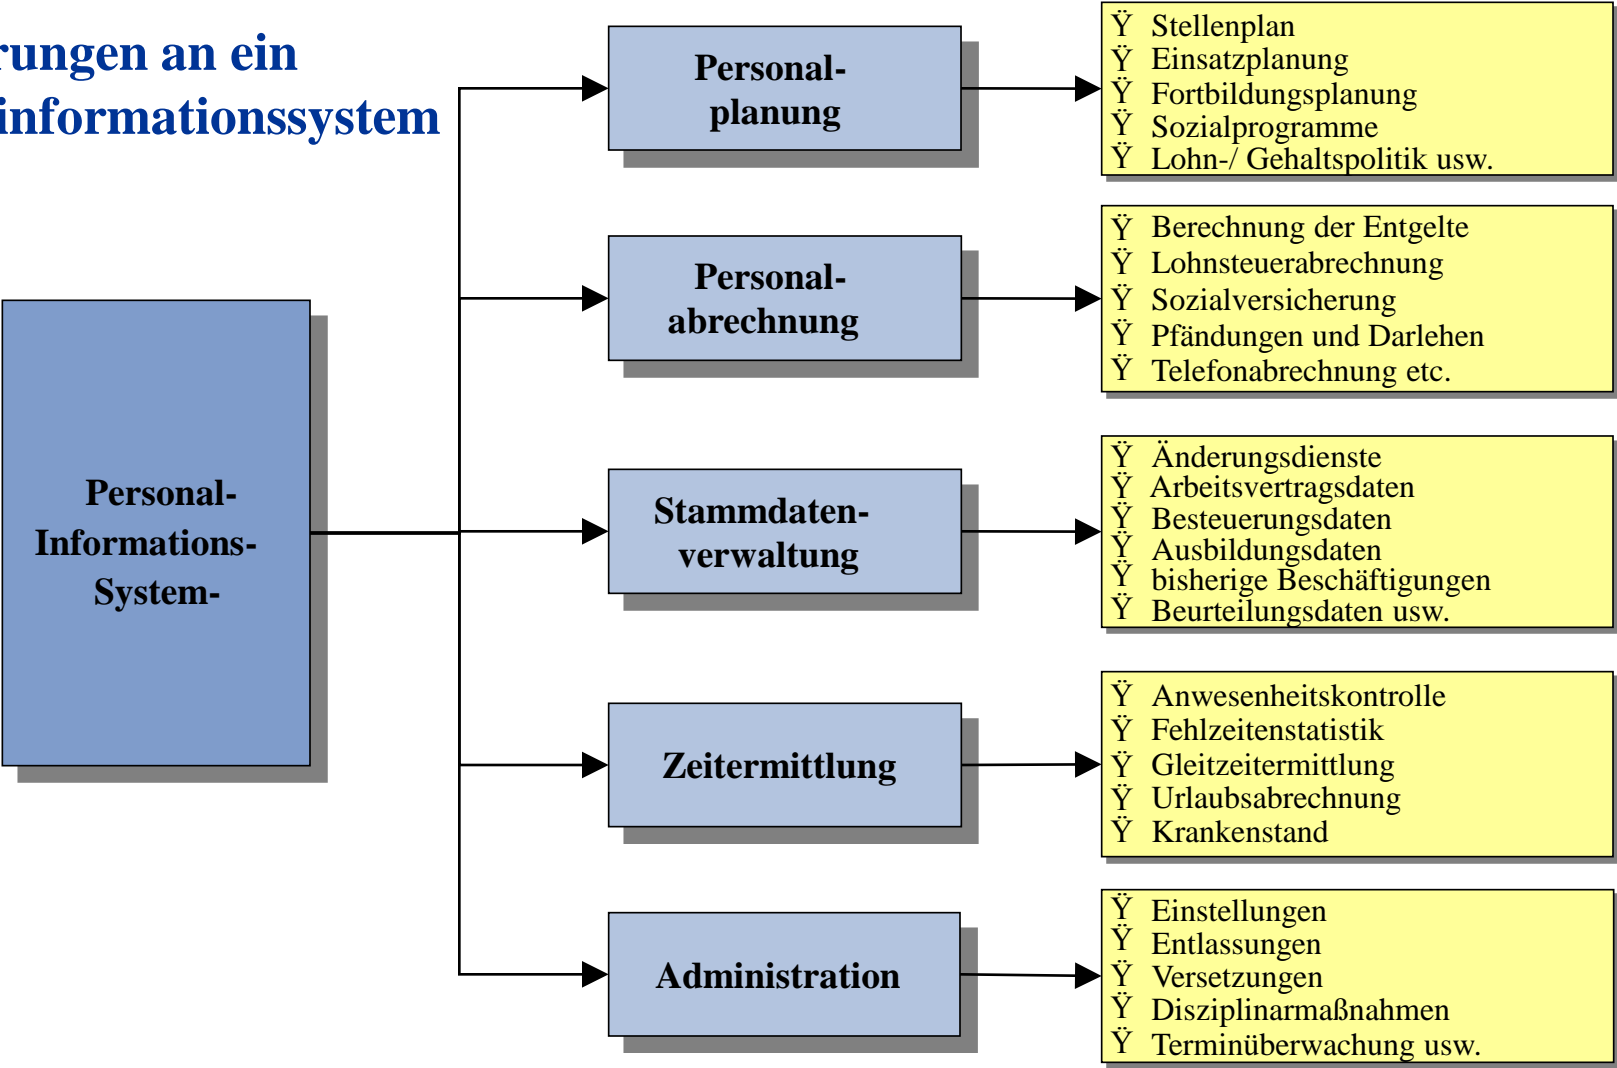

S. 709 Abb. 43



Aufbau eines  
Personalinformationssystems

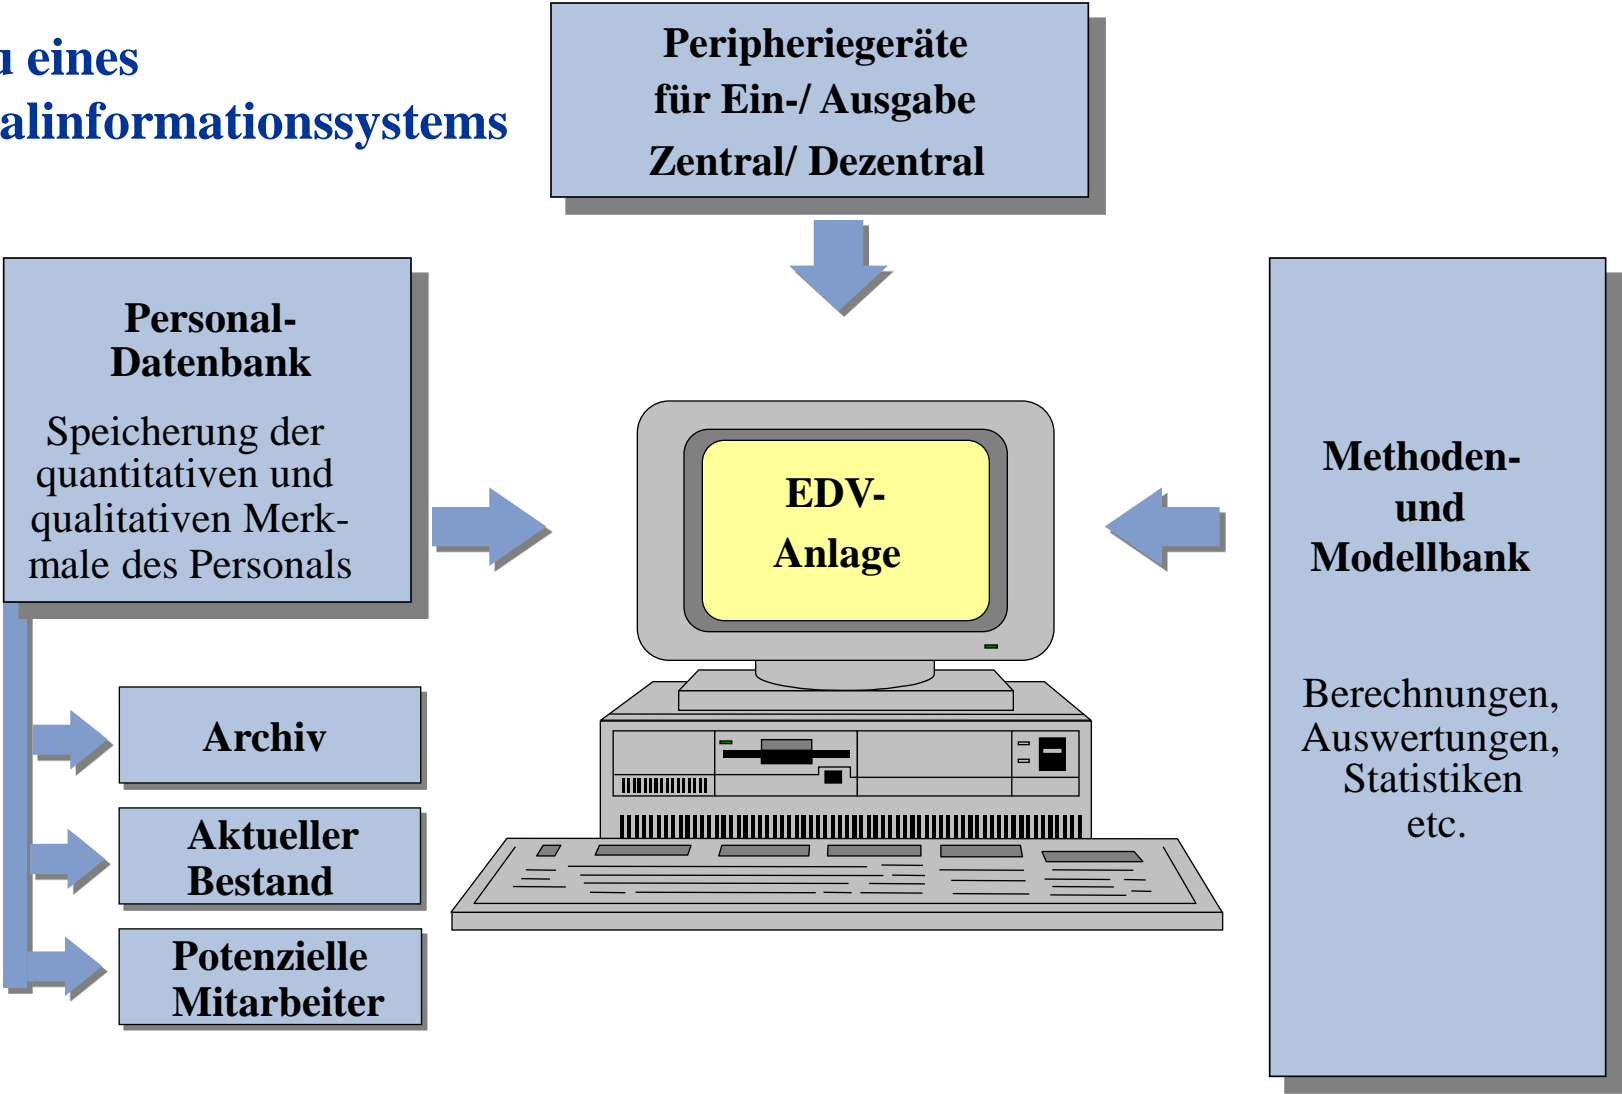

S. 712 Abb. 44



### **Aktivitäten zur Datenumsetzung**

Belegerstellung (Eintragung der Daten in Formulare)

Belegprüfung (Prüfen der Belege auf Richtigkeit, Vollständigkeit und formale Genauigkeit)

Aufzeichnung der Daten auf maschinell lesbare Datenträger oder direkte Eingabe

Anzeige der eingegebenen Daten zu Kontrollzwecken

Datenprüfung (Kontrolle auf Übereinstimmung von Erfassungsbeleg und Datenträger)

Korrektur falsch eingegebener Werte

Unterstützung der Eingabe durch Steuerung der Bedienerfolge oder Erfassungsvorschriften

Formatsteuerung (Ordnen; Verdichten; Poolen, d.h. Zusammenführen von Daten zu einer kollektiven Sicherung)

Konvertierung von Daten

Plausibilitätsprüfung

Zusammenführung von Daten (z.B. von Bewegungs- und Stammdaten)

S. 715 Abb. 45  
(in Anlehnung an: Hansen, H. R.: Wirtschaftsinformatik, Stuttgart 1992, S. 489)





Die **Nutzenelemente eines Personalinformationssystems** lassen sich nach dem jeweiligen Einsatzbereich gliedern:

➤ **Personalverwaltung**

- Verringerung von Fehlerhäufigkeiten bei der Erstellung von Personalstatistiken, Lohn- und Gehaltsabrechnung sowie allgemein bei der Speicherung und Übertragung von Personaldaten jeglicher Art
- Größere Konsistenz verschiedener Personalinformationen untereinander
- Zeitersparnis in der Informationsgewinnung
- Schneller Datenzugriff und schnellere Datenverarbeitung bei unregelmäßig anfallendem Datenbedarf
- Im Regelfall bessere Wahrung der Vertraulichkeit
- Personaleinsparungen durch Automatisieren der Personalkartei, der Lohn- und Gehaltsabrechnung, bzw. anderer Personalverwaltungseinheiten



### ➤ **Personalplanung**

- Ermöglichung schnellerer Personalentscheidungen
- Erweiterter und verbesserter Informationsfluss für Planungszwecke aufgrund größerer Datenkonsistenz
- Einschränkung der Fehlerwahrscheinlichkeit bei der Erstellung von Personalplänen
- Schnelleres Aufzeigen von lang- und kurzfristigen Trends im Personalbereich
- Personaleinsparungen in der Erstellung der betrieblichen Arbeitskräfteplanung

### ➤ **Personalkontrolle**

- Möglichkeiten einer schnelleren und genaueren Abweichungskontrolle in Bezug auf Leistung und Personalfluss.



## Arten und Merkmale der betrieblichen Datenerfassung

| Art der Datenerfassung    | Merkmale                                                                       |
|---------------------------|--------------------------------------------------------------------------------|
| <b>indirekt</b>           | Eingabe über maschinell lesbare Datenträger                                    |
| <b>halbdirekt</b>         | Belege dienen gleichzeitig als Datenträger                                     |
| <b>direkt</b>             | direkte Eingabe der Daten, z.B. über Tastatur                                  |
| <b>dezentral</b>          | Erfassung in den einzelnen Fachabteilungen                                     |
| <b>zentral</b>            | Erfassung im Rechenzentrum                                                     |
| <b>sukzessiv</b>          | Erfassung erfolgt gemäß definierter Abfolge                                    |
| <b>simultan</b>           | nur ein geschlossener Erfassungsschritt                                        |
| <b>mit Einzelgeräten</b>  | Erfassungsplatz autonom und unabhängig                                         |
| <b>mit Sammelsystemen</b> | eine Leitzentrale, ein gemeinsamer Datenträger                                 |
| <b>off-line</b>           | keine direkte Steuerung zwischen Erfassungsgeräten und Verarbeitungsrechner    |
| <b>on-line</b>            | Steuerungszusammenhang zwischen Erfassungsgeräten und dem Verarbeitungsrechner |
| <b>stationär</b>          | fest an einem Ort installierte Erfassungsgeräte                                |
| <b>mobil</b>              | Erfassung durch tragbare Eingabegeräte                                         |

S. 716 Abb. 46



Arten der  
Datenerfassung

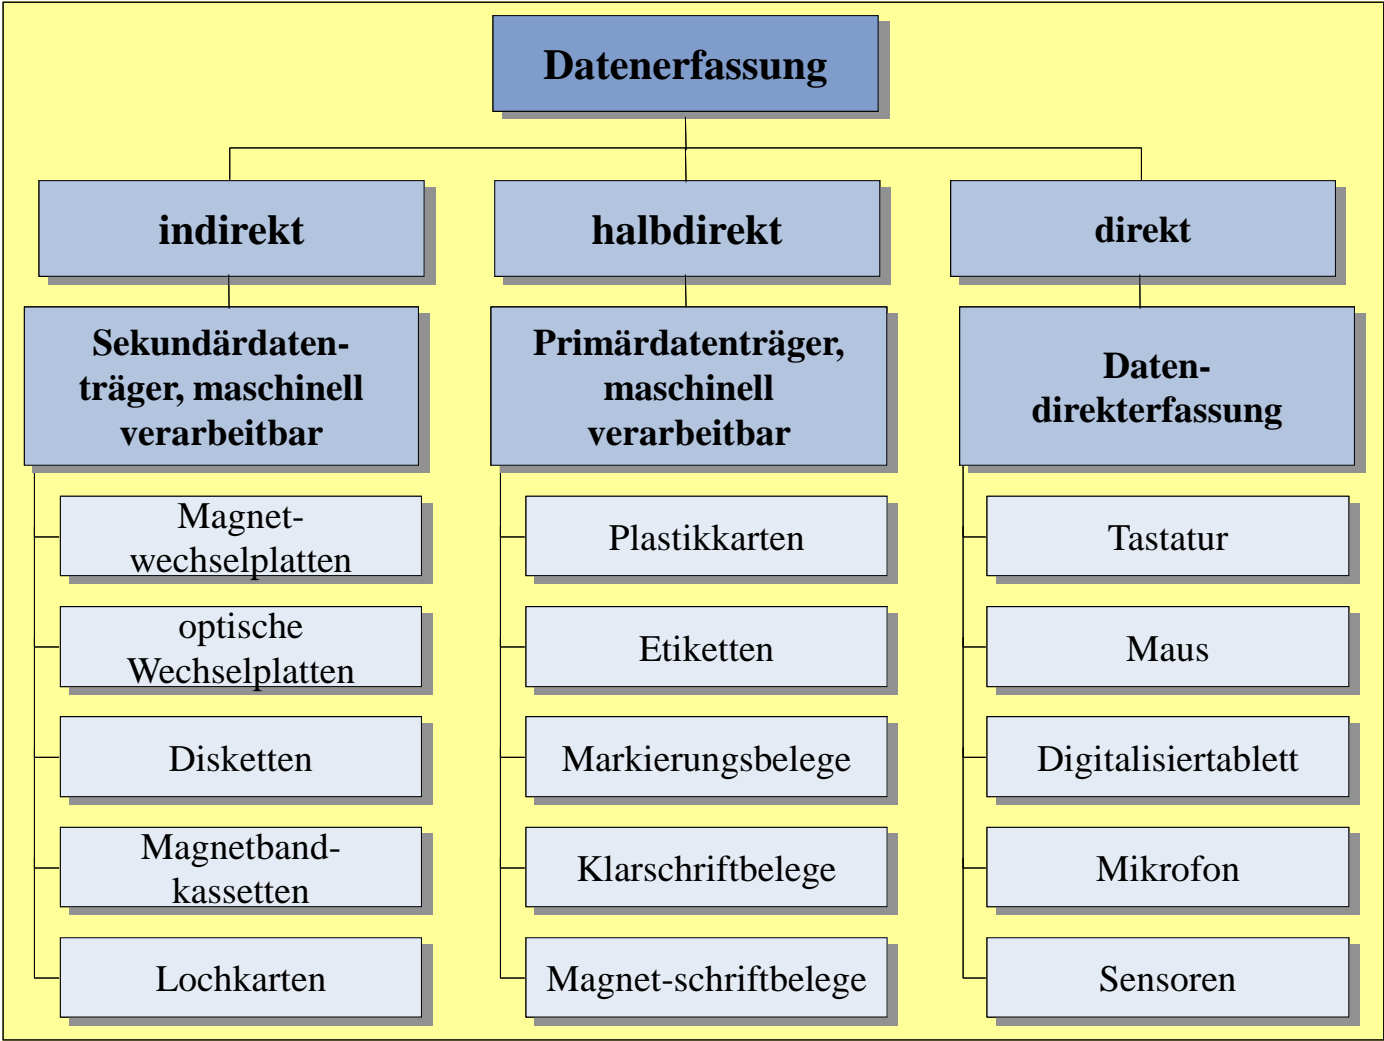

S. 717 Abb. 47

## Direkte Datenerfassung über Tastatur bzw. registrierende Geräte

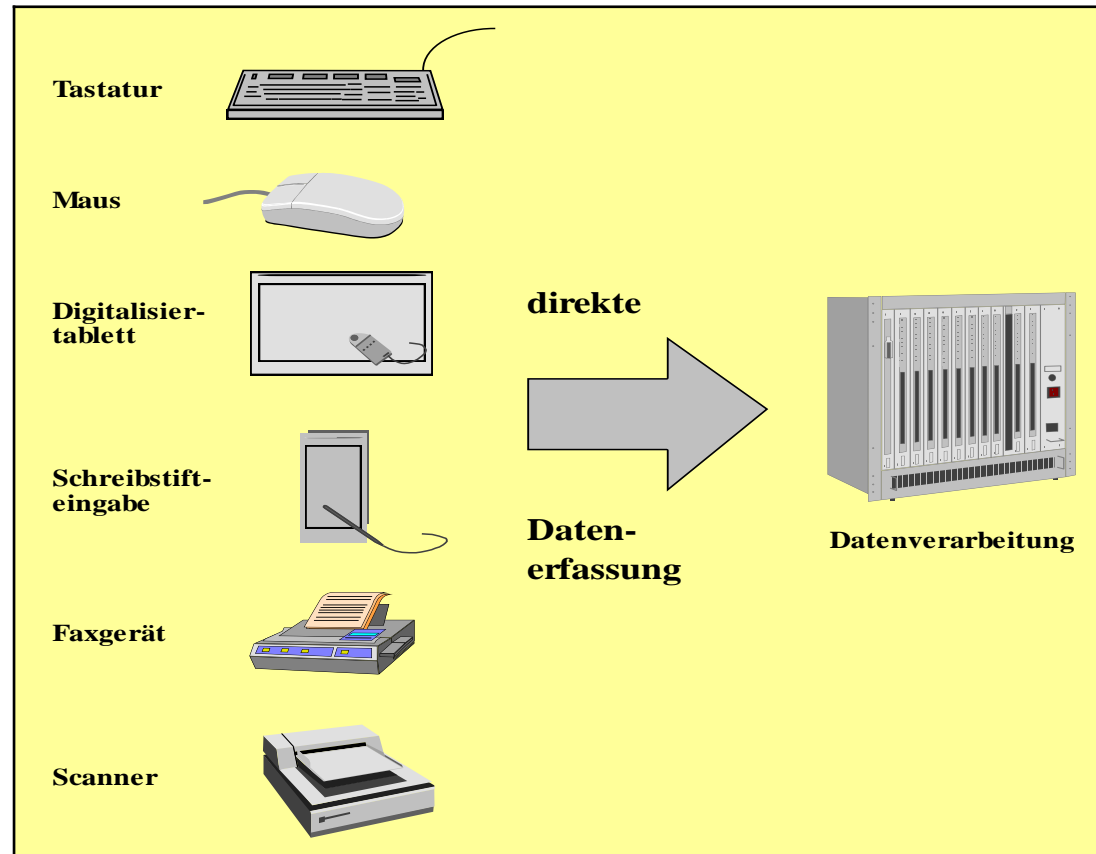

S. 719 Abb. 48

Jung, Hans: Personalwirtschaft, 9. Aufl., München 2010.

© Oldenbourg Wissenschaftsverlag



Kostenarten beim Aufbau und Betrieb eines Personalinformationssystems

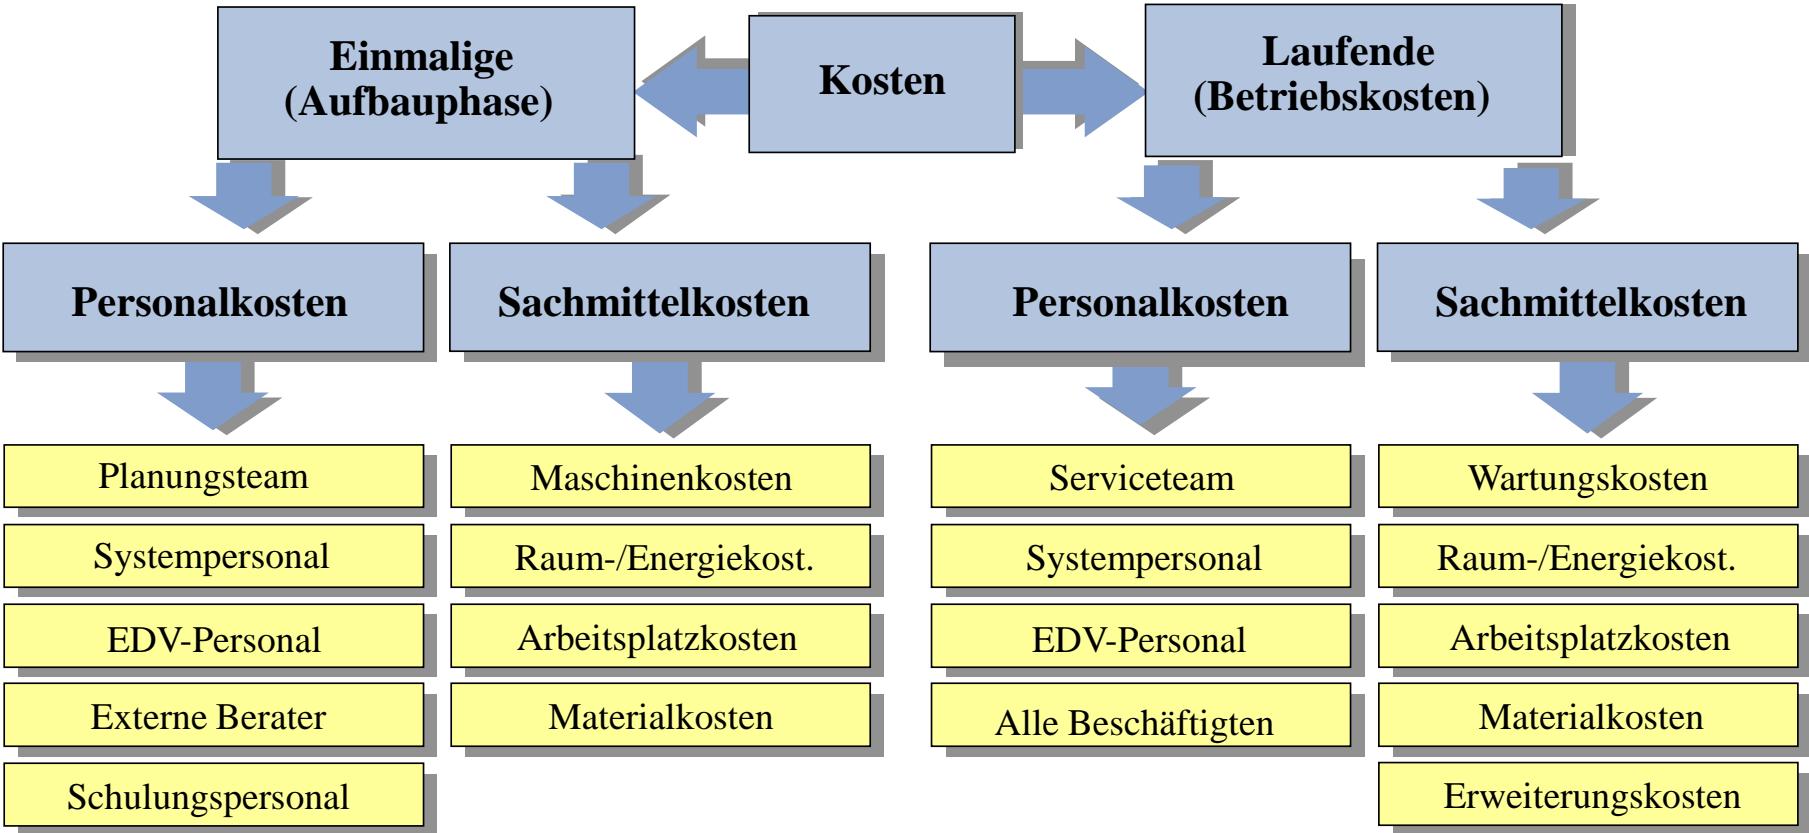

S. 723 Abb. 49

(in Anlehnung an:: Domsch, M./Schneble, A.: Aufbau und Einsatz betrieblicher Personalinformationssysteme, Landsberg am Lech1991, S. 105

Domsch, M./Schneble, A.: Aufbau und Einsatz betrieblicher Personalinformationssysteme, Landsberg am Lech1991, S. 356)

## Künstliche Intelligenz bei Personalinformationssystemen

- 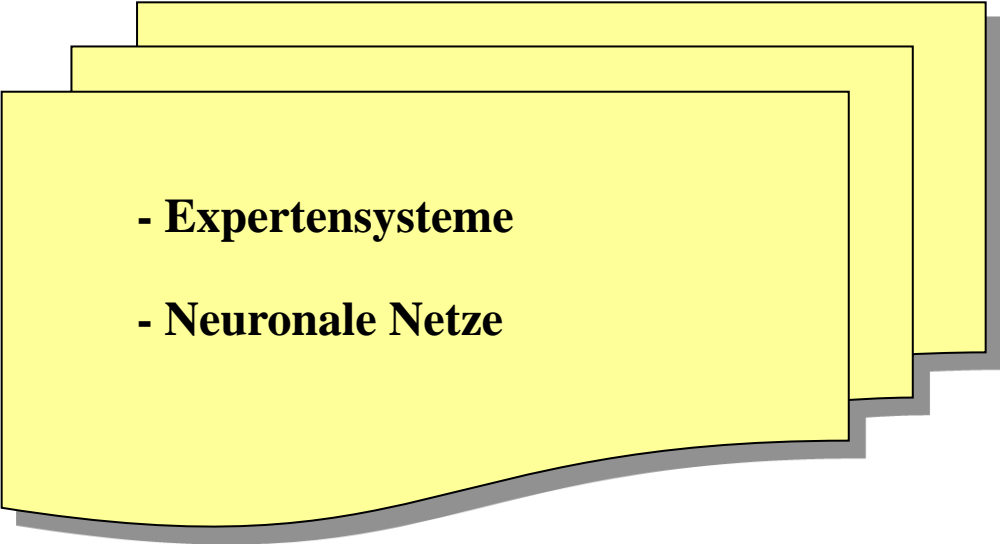
- Expertensysteme
  - Neuronale Netze



# Gegenüberstellung der klassischen Datenverarbeitung und der Wissensverarbeitung mit Hilfe von Expertensystemen

| Klassische Datenverarbeitung                                                                     | Wissensverarbeitung mit Hilfe von Expertensystemen                                                                      |
|--------------------------------------------------------------------------------------------------|-------------------------------------------------------------------------------------------------------------------------|
| Verarbeitung von Zahlen                                                                          | Verarbeitung symbolischer Ausdrücke                                                                                     |
| Typische Programmiersprachen: COBOL, PASCAL                                                      | Typische Programmiersprachen: LISP, PROLOG                                                                              |
| Programmierungsmethodik: strukturiertes Programmieren                                            | Programmierungsmethodik: exploratives Programmieren                                                                     |
| Verarbeitungsablauf ist explizit festgelegt                                                      | Verarbeitungsablauf ist nur implizit oder gar nicht vorgegeben                                                          |
| Verarbeitung homogener strukturierter Massendaten                                                | Verarbeitung heterogener strukturierter Wissensseinheiten                                                               |
| Unvollständige Eingaben werden zurückgewiesen                                                    | Unvollständige Strukturen können verarbeitet werden                                                                     |
| Effiziente Verarbeitung mit konventionellen Rechnerarchitekturen möglich                         | Effiziente Verarbeitung mit konventionellen Rechnerarchitekturen nicht möglich                                          |
| Automatisierung monotoner, klar strukturierter und definierter Informationsverarbeitungsprozesse | Automatisierung komplexer Informationsverarbeitungsprozesse, die den intelligenten Umgang mit diffusem Wissen erfordern |

S. 728 Abb. 50  
(in Anlehnung an: Wahlster, W.: Expertensysteme, München 1990, S. 173 ff)

Jung, Hans: Personalwirtschaft, 9. Aufl., München 2010.

© Oldenbourg Wissenschaftsverlag





Beispielmodell eines Expertensystems

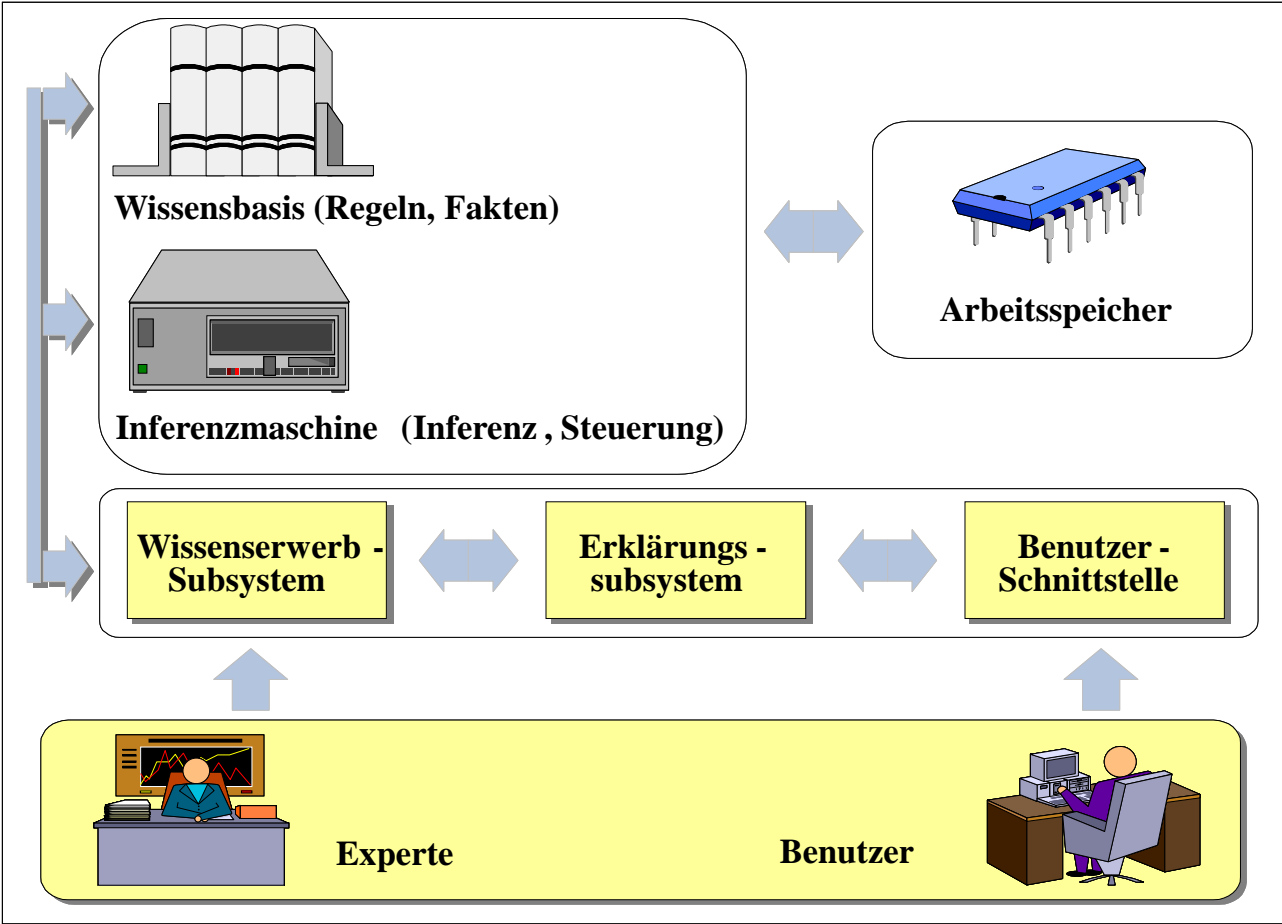

S. 729 Abb. 51



Wissenstransfer innerhalb  
eines Expertensystems

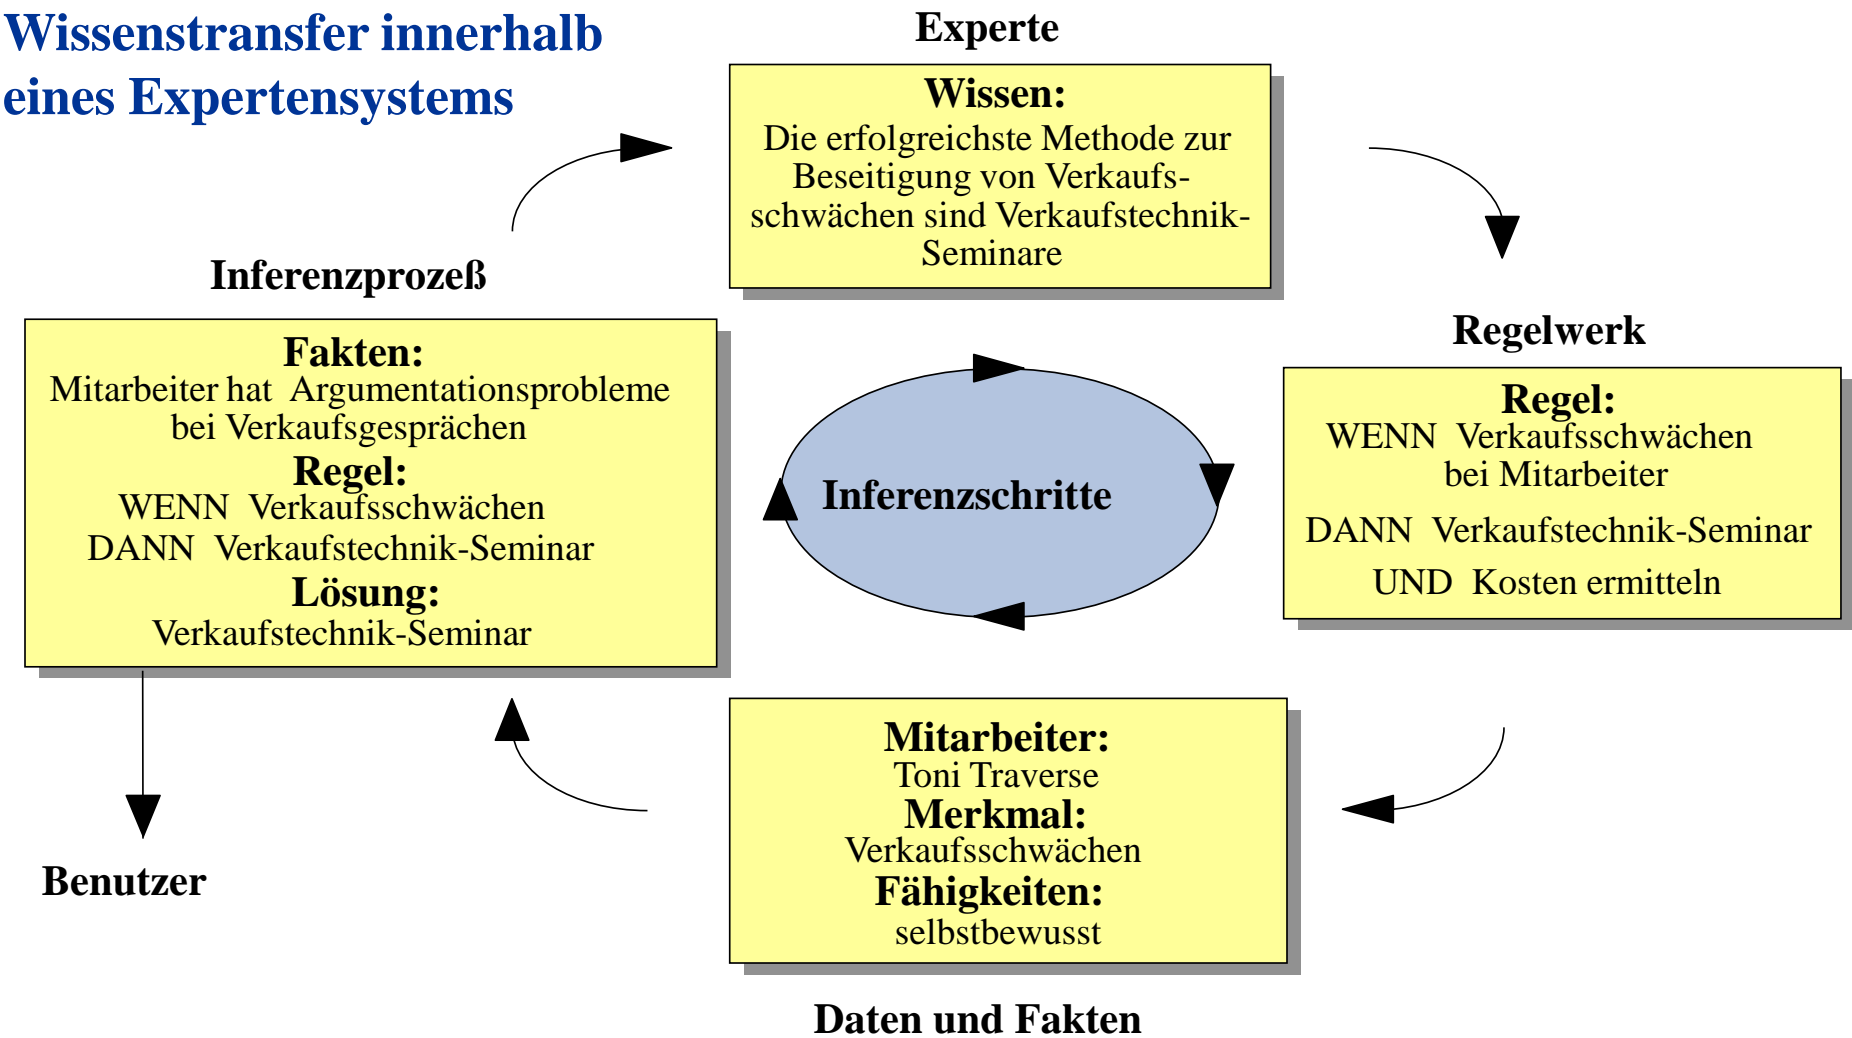

S. 730 Abb. 52



## Neuronale Netze

- Neuronale Netze orientieren sich in Gestalt und Funktion am Aufbau des menschlichen Gehirns. Das Gehirn besteht aus unzähligen Nervenzellen, die zur Informationsverarbeitung dienen. Je nach Grad der Erregung werden Nachrichten in Form von Impulsen von Zelle zu Zelle weitergegeben. Aufgabe des Gehirns ist die Aufnahme und Verarbeitung von Reizen, die über Sensoren aufgenommen werden. Diese Reize werden umgewandelt und in Form von Signalen über Nervenbahnen an das Gehirn weitergeleitet.
- Das Hauptmerkmal von neuronalen Netzen ist neben der Anlehnung an das menschliche Gehirn die Tatsache, dass dieses System lernfähig ist. Es erfolgt keine explizite Eingabe des speziellen Fachwissens durch einen Systemanalytiker wie bei den Expertensystemen, sondern das Lernen erfolgt anhand von Trainingsbeispielen.  
Als Algorithmen sind sie in Form von Programmen oder Simulationen in den verschiedensten Bereichen bereits in Anwendung.



## Einsatzgebiete

**Beispiel 1: Onlineabfrage und Reports**

**Beispiel 2: Personalbewerbung**

**Beispiel 3: Personalentwicklung**

**Beispiel 4: Beendigung des Arbeitsverhältnisses**



# Dimensionsvergleich zwischen den menschlichen Gehirn und dem Computer

|                                             | Gehirn                        | Computer                      |
|---------------------------------------------|-------------------------------|-------------------------------|
| Anzahl Verarbeitungselemente                | ca. 1011 Neuronen             | ca. 109 Transistoren          |
| Art der Verarbeitung                        | massiv parallel               | im Allgemeinen seriell        |
| Speicherung                                 | assoziativ                    | adressbezogen                 |
| Schaltzeit eines Elementes                  | ca. 1 ms (10 <sup>-3</sup> s) | ca. 1 ns (10 <sup>-9</sup> s) |
| "Schaltvorgänge"/s                          | ca. 10 <sup>3</sup> /s        | ca. 10 <sup>9</sup> /s        |
| "Schaltvorgänge" insgesamt<br>(theoretisch) | ca. 10 <sup>13</sup> /s       | ca. 10 <sup>18</sup> /s       |
| "Schaltvorgänge" insgesamt<br>(tatsächlich) | ca. 10 <sup>12</sup> /s       | ca. 10 <sup>10</sup> /s       |

S. 731 Abb. 53  
(in Anlehnung an: Zell, A.: Simulation neuronaler Netze, Bonn 1994, S. 28)

## Online Abfrage und Report

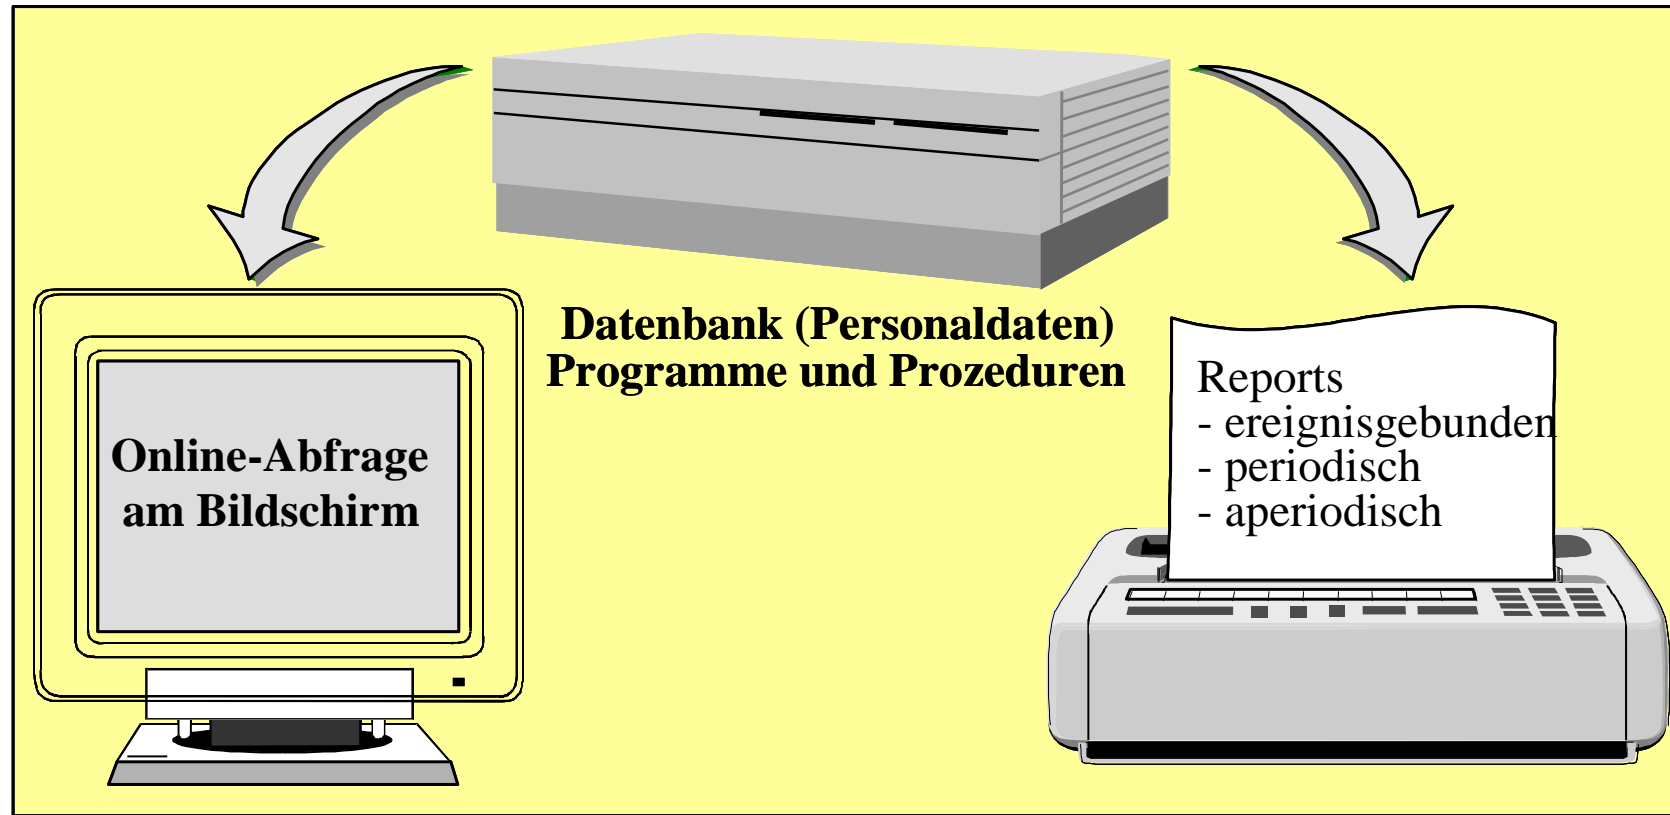



Online-Anfrage-Beispiel (Persönliche Daten)

|                  |                                 |                 |                          |
|------------------|---------------------------------|-----------------|--------------------------|
| PIS              | Mitarbeiterstammdatenverwaltung |                 | 10.06.2007               |
|                  | persönliche Daten               |                 |                          |
| P-Nr.: 8932      | Name: Gerd Hansen               |                 | Abteilung:<br>Produktion |
| Name:            | Hansen                          | Vorname:        | Gerd                     |
| Anredecode:      | 3/Herr                          | Geschlecht:     | M                        |
| Geburtsdatum:    | 15.04.1971                      | Geburtsort:     | Berlin                   |
| Nationalität:    | Deutsch                         | RV-Nummer:      | 357.51.576.654           |
| Zivilstandscode: | 1/verheiratet                   | Muttersprache:  | deutsch                  |
| Eintrittsdatum:  | 12.04.1997                      | Fremdsprache 1: | Kenntnis: A              |
|                  |                                 | Fremdsprache 2: | Kenntnis: -              |
|                  |                                 | Fremdsprache 3: | Kenntnis: F              |
|                  |                                 |                 |                          |
| Ausbildung:      | 230/Schlosser                   |                 |                          |
| Adresse:         | Sackgasse 15                    |                 |                          |
| Postleitzahl:    | 20364                           |                 |                          |
| Wohnort:         | Hamburg                         |                 |                          |
|                  |                                 |                 |                          |
| Auswahl: 17      | Bild: C                         | Funktion: E     | Schlüssel: 8932          |

S. 732 Abb. 55



Austrittsliste als ereignisgebundener Report

| Austritte                                                           |                   |           |          |        | 10.12.2007 |
|---------------------------------------------------------------------|-------------------|-----------|----------|--------|------------|
| Folgende Mitarbeiter haben ihr Arbeitsverhältnis bei uns gekündigt: |                   |           |          |        |            |
| P-Nr.                                                               | Name              | Abteilung | Tel.-Nr. | Büro   | Künd.-Dat. |
| 0263                                                                | Rüstig, Maria     | RZ        | 6443     | A-XXI  | 31.05.05   |
| 3483                                                                | Großmann, Gernot  | FKL       | 2833     | D-XVI  | 31.03.05   |
| 8544                                                                | Steinhaus, Martin | PRD       | 8443     | B-XIII | 31.05.05   |

S. 733 Abb. 56



## Zahlenbeispiel zum jährlichen Personalbedarf eines Unternehmens

|                            |                   |
|----------------------------|-------------------|
| Gesamtpersonalbestand:     | 3.000 Mitarbeiter |
| Personal-Zusatzbedarf:     | 50 Mitarbeiter    |
| Personal-Fluktuationsrate: | 8 %               |
| Personalersatzbedarf:      | 240 Mitarbeiter   |
| Personalbedarf insgesamt:  | 290 Mitarbeiter   |



Personaldaten

| Erfassung der Bewerberdaten |               |
|-----------------------------|---------------|
| Kennziffer der Bewerbung:   | 007           |
| Name:                       | Gerd Hansen   |
| Geburtsdatum:               | 31.12.1971    |
| Qualifikation:              | Schlosser     |
| Adresse:                    | Sackgasse 15  |
| Postleitzahl/Wohnort:       | 20123 Hamburg |
| Eingang der Bewerbung am:   | 20.05.2005    |
| Bewerber eingeladen am:     | 22.05.2005    |
| Keine Einladung/Absage am:  |               |
| Grund der Absage:           |               |
| 1. Vorstellungsgespräch am: | 27.05.2005    |
| Absage am:                  |               |
| Grund der Absage:           |               |
| 2. Vorstellungsgespräch am: |               |
| Absage am:                  |               |
| Grund der Absage:           |               |
| Bewerbung zurückgestellt:   |               |
| Vertrag ausgehändigt am:    | 02.06.2005    |
| Vertrag unterzeichnet am:   | 08.06.2005    |
| Eintritt am:                | 01.09.2005    |

S. 734 Abb. 58



| Personalentwicklung eines Mitarbeiters |                  |                 |                          |           |
|----------------------------------------|------------------|-----------------|--------------------------|-----------|
| Name:                                  |                  | Lothar Leiter   |                          |           |
| Geburtsdatum:                          |                  | 03.06.1974      |                          |           |
| Kennzahl:                              |                  | 123             |                          |           |
| Eintrittsdatum:                        |                  | 25.11.1994      |                          |           |
| Gehaltsklasse:                         |                  | 20              |                          |           |
| Abteilung:                             |                  | Vertrieb        |                          |           |
| Momentane Position:                    |                  | Vertriebsleiter |                          |           |
| Betrieblicher Werdegang:               |                  |                 |                          |           |
| Jahr                                   | Arbeitsplatz     | Gehaltsklasse   | Qualifikations-<br>stufe | Abteilung |
| 12/94                                  | Sachbearbeiter 2 | 8               | 1                        | Vertrieb  |
| 12/95                                  | Sachbearbeiter 2 | 8               | 2                        | Vertrieb  |
| 12/96                                  | Sachbearbeiter 1 | 10              | 4                        | Vertrieb  |
| 12/97                                  | Sachbearbeiter 1 | 11              | 3                        | Einkauf   |
| 12/98                                  | Sachbearbeiter 1 | 11              | 4                        | Einkauf   |
| 12/99                                  | Sachbearbeiter 1 | 12              | 5                        | Einkauf   |
| 12/00                                  | Gruppenleiter 2  | 14              | 3                        | Vertrieb  |
| 12/01                                  | Gruppenleiter 1  | 14              | 4                        | Vertrieb  |
| 12/02                                  | Gruppenleiter    | 15              | 5                        | Vertrieb  |
| 12/03                                  | Abteilungsleiter | 17              | 4                        | Vertrieb  |

S. 736 Abb. 59A



(Fortsetzung)

| Ausbildung:                     |                                                                                                |             |
|---------------------------------|------------------------------------------------------------------------------------------------|-------------|
| Berufsausbildung:               | Groß- und Einzelhandelskaufmann                                                                | 2000 - 03   |
| Interne<br>Weiterqualifikation: | Seminar "Verkaufstechnik"                                                                      | 2004        |
|                                 | Seminar "Argumentationstechnik"                                                                | 2006        |
|                                 | Seminar "Führung von Mitarbeitern"                                                             | 2007        |
| Externe<br>Weiterqualifikation: | Sprachkurs "Business-English"                                                                  | 2003/04     |
|                                 | Studium der Wirtschaftswissenschaften an der Fernuniversität, Abschluss: "Bachelor of Science" | 2008 - 2012 |

S. 736 Abb. 59B

## 4. Personalbeurteilung

- 4.1 Grundlagen
- 4.2 Aufgabe und Zweck der Personalbeurteilung
- 4.3 Voraussetzungen, Ziele und Funktionen der Beurteilung
- 4.4 Beurteilungskriterien
- 4.5 Methoden der Personalbeurteilung
- 4.6 Gütemerkmale der Beurteilungsverfahren
- 4.7 Fehlerquellen bei der Beurteilung
- 4.8 Durchführung der Leistungsbeurteilung
- 4.9 Auswirkungen der Personalbeurteilung

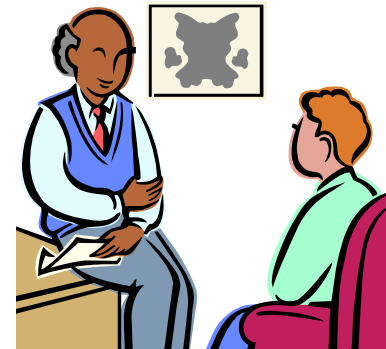

## Schematische Gliederung der Personalbeurteilung

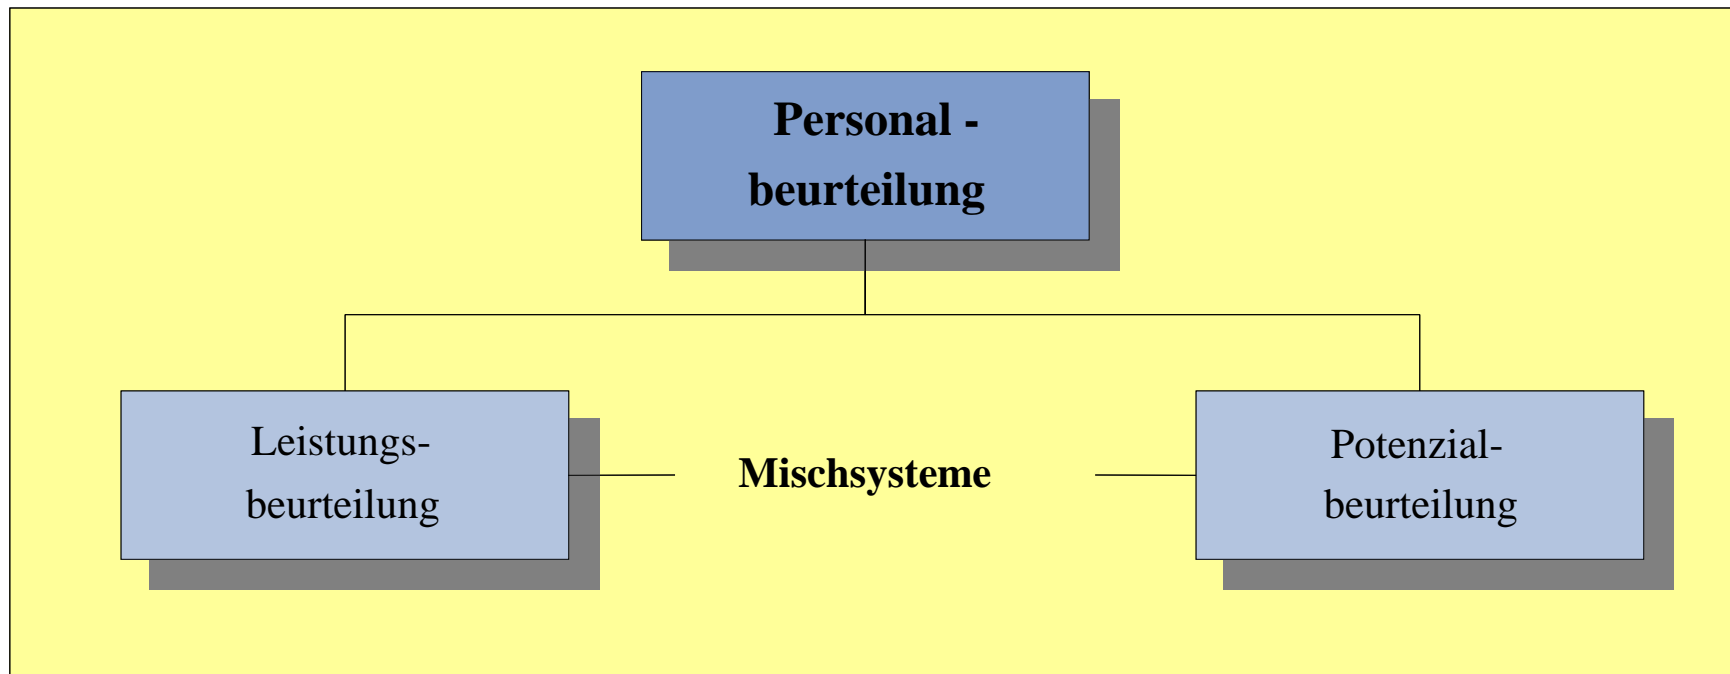

S. 738 Abb. 60

Jung, Hans: Personalwirtschaft, 9. Aufl., München 2010.

© Oldenbourg Wissenschaftsverlag

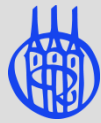

| Anlässe der Beurteilung                |                                     |
|----------------------------------------|-------------------------------------|
| Ablauf der Probezeit                   | Besondere Fördermaßnahmen           |
| Versetzung                             | Beförderung                         |
| Wechsel des unmittelbaren Vorgesetzten | Job rotation                        |
| Auf Wunsch des Mitarbeiters            | Beendung eines Projektes            |
| Auf Wunsch des Vorgesetzten            | Beendigung des Arbeitsverhältnisses |
| Lohn- und Gehaltserhöhung              | Zeugnisausstellung                  |

S. 742 Abb. 61



Mehrleistung zur Bemessung der Leistungszulage

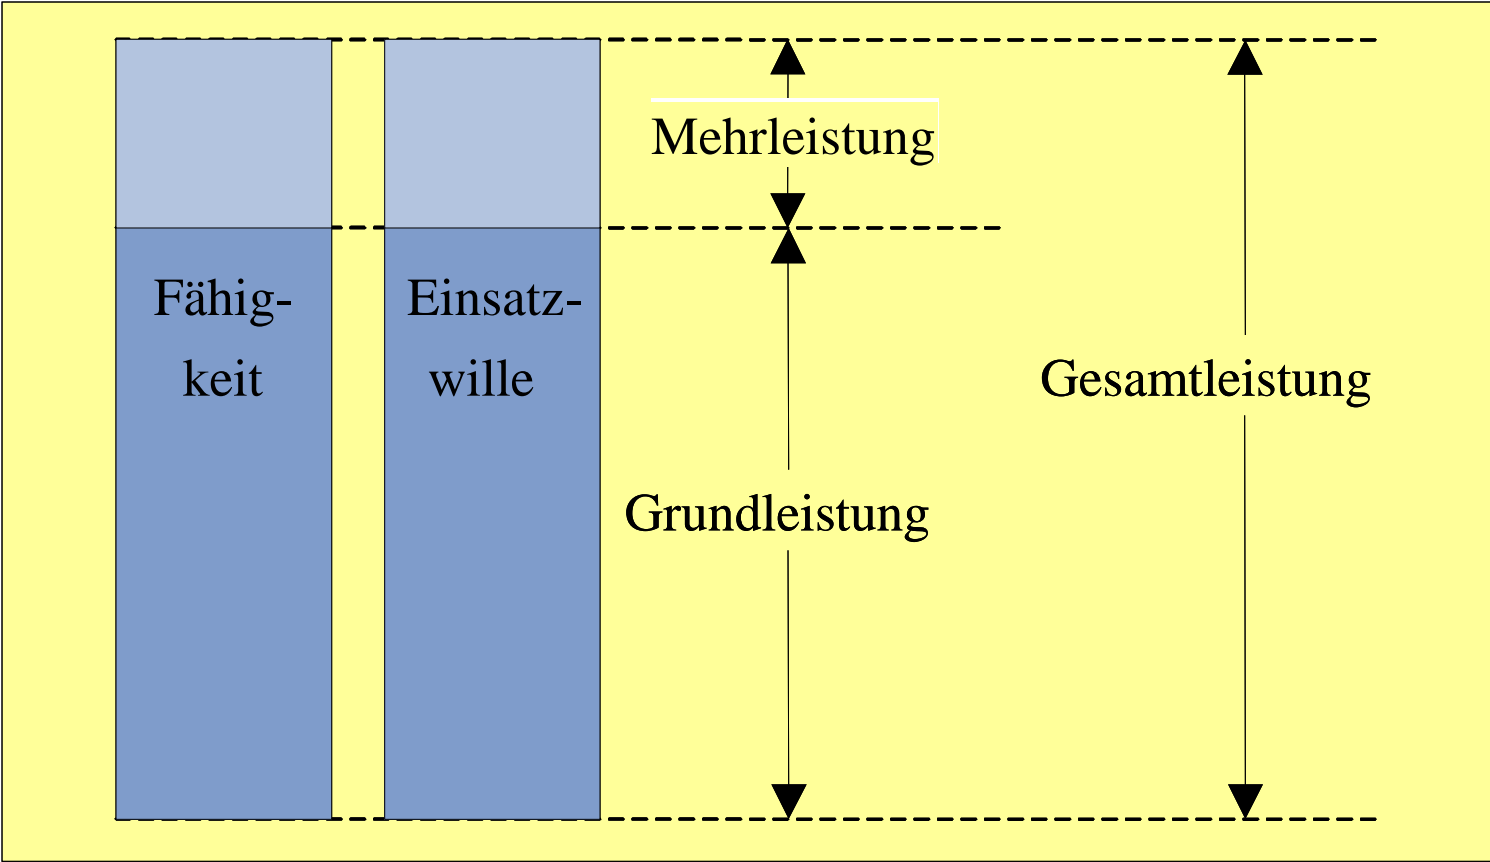

S. 744 Abb. 62



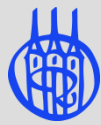

Beurteilungskriterien (Beispiele)

| Geistige Anlagen |                                                        |
|------------------|--------------------------------------------------------|
| Auffassungsgabe  | Sachverhalte u. Zusammenhänge schnell aufnehmen können |
| Logik            | Das Ziehen folgerichtiger Schlüsse                     |
| Kreativität      | Neue originelle Lösungen finden                        |
| Gedächtnis       | Merkfähigkeit                                          |

S. 745 Abb. 63



| Kriterien des Arbeitsverhaltens |                                                                                         |
|---------------------------------|-----------------------------------------------------------------------------------------|
| Arbeitsplanung                  | Gedankliche Vorausschau der zukünftigen Arbeit und Bereitstellung der benötigten Mittel |
| Arbeitsqualität                 | Güte der Arbeitsdurchführung                                                            |
| Arbeitstempo                    | Zeitaufwand zur Bewältigung der Arbeit                                                  |
| Augenmaß                        | Richtige Einschätzung von Personen und Sachverhalten                                    |
| Ausdauer                        | Beständigkeit bei der Arbeitsausführung                                                 |
| Belastbarkeit                   | Körperliche und geistige Ermüdung erkennen lassen                                       |
| Entschlusskraft                 | Sich in angemessener Zeit entscheiden können                                            |
| Fleiß                           | Kontinuität der Arbeitsdurchführung                                                     |
| Fachkenntnisse                  | Anwendung von Fachwissen auf die zu lösenden Aufgaben                                   |
| Fehlerhäufigkeit                | Verhältnis Fehler zur Arbeitsmenge                                                      |
| Initiative                      | Aus eigenem Antrieb tätig werden                                                        |
| Lernwille                       | Bemühen, sich weiterzubilden; Erfahrungen ausnutzen                                     |
| Pünktlichkeit                   | Vereinbarte Termine einhalten                                                           |
| Selbstständigkeit               | Nach Anleitung ohne Rückfragen tätig werden                                             |
| Verantwortungsbereitschaft      | Die Konsequenzen der eigenen Handlung tragen                                            |
| Zuverlässigkeit                 | Erfüllung von Zusagen                                                                   |

S. 746 Abb. 64

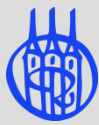

| Verhalten gegenüber Kollegen und Vorgesetzten |                                                                                      |
|-----------------------------------------------|--------------------------------------------------------------------------------------|
| Aggressivität                                 | Erzeugen von Konfrontationen                                                         |
| Aufgeschlossenheit                            | Aktiv am Umweltgeschehen teilnehmen                                                  |
| Empfindlichkeit                               | Sensibilität in Bezug auf das eigene Selbstwertgefühl                                |
| Hilfsbereitschaft                             | Unterstützung der Mitmenschen                                                        |
| Mitteilungsbereitschaft                       | Informationen und Wissen weitergeben                                                 |
| Toleranz                                      | Eigenschaften auch gelten lassen, wenn sie nicht der eigenen Überzeugung entsprechen |
| Zusammenarbeit                                | Bereitschaft zu gemeinsamen Aufgabenlösungen                                         |

S. 746 Abb. 65



| Führungsverhalten     |                                                                                                                    |
|-----------------------|--------------------------------------------------------------------------------------------------------------------|
| Arbeitsanleitung      | Den Mitarbeitern Aufgaben zuteilen, die angestrebten Ziele definieren und Hilfsmittel zur Zielerreichung aufzeigen |
| Ausgeglichenheit      | Gemütszustände erkennen lassen                                                                                     |
| Delegation            | Aufgabenübertragung an Mitarbeiter                                                                                 |
| Durchsetzungsvermögen | Die Mitarbeiter zur Ausführung der Anordnung bewegen                                                               |
| Kontrolle             | Überwachung der Mitarbeiter                                                                                        |
| Motivationsfähigkeit  | Mitarbeiter zur langfristigen Leistungssteigerung bewegen                                                          |
| Objektivität          | Gleichheit der Mitarbeiterbehandlung                                                                               |

S. 746 Abb. 66



| Persönliches Auftreten |                                                      |
|------------------------|------------------------------------------------------|
| Ausdrucksvermögen      | Sich in angemessener Weise sprachlich ausdrücken     |
| Erscheinungsbild       | Zustand der Kleidung und Körperpflege                |
| Selbstbewusstsein      | Sich ohne Überheblichkeit seines Wertes bewusst sein |
| Umgangsformen          | Art des Auftretens                                   |

S. 747 Abb. 67

Jung, Hans: Personalwirtschaft, 9. Aufl., München 2010.

© Oldenbourg Wissenschaftsverlag



Beurteilungskriterien des Führungsverhaltens

| Mitarbeiter ohne<br>Personalverantwortung                                                                                                                                                                  | Mitarbeiter mit<br>Personalverantwortung                                                                                                                                                                                                    |
|------------------------------------------------------------------------------------------------------------------------------------------------------------------------------------------------------------|---------------------------------------------------------------------------------------------------------------------------------------------------------------------------------------------------------------------------------------------|
| <b>1. Arbeitsergebnisse</b><br>Menge/Umfang, Güte/Komplexität, Kosten, Termine                                                                                                                             | <b>1. Arbeitsergebnisse</b><br>Menge/Umfang, Güte/Komplexität, Kosten, Termine                                                                                                                                                              |
| <b>2. Arbeitseinsatz</b><br>Initiative, Ausdauer, Belastbarkeit, Übernahme von Verantwortung, Selbständigkeit, Verhalten in Ausnahmesituationen, Planung und Disposition der eigenen Arbeit, Beweglichkeit | <b>2. Mitarbeiterereinsatz</b><br>Mitarbeiterauswahl und Stellenbesetzung, Ziele setzen, Aufgaben verteilen, Delegieren, Anleiten und Unterweisen, Kontrolle, Schulung, Durchsetzungsvermögen                                               |
| <b>3. Arbeitssorgfalt</b><br>Gründlichkeit, Zuverlässigkeit, Arbeitssicherheit, Beachten von Regeln und Richtlinien, Kostenbewusstsein, Rationelles Verwenden von Betriebsmitteln, Vermeiden von Verlusten | <b>3. Mitarbeiterbehandlung</b><br>Leistungsbeurteilung und Honorierung, Anerkennung und Kritik, Laufbahnplanung, Behandeln von Mitarbeiteranliegen, Übereinstimmung erzielen, Durchführen von Mitarbeitergesprächen und Abteilungsmeetings |
| <b>4. Fachkönnen</b><br>Aufgabenbezogene Kenntnisse, Aktualität des Wissens, Kreativität, Lerninitiative, Erkennen des Wesentlichen, Aufgeschlossenheit für Neues                                          | <b>4. Arbeitsverhalten</b><br>Initiative, Kreativität, Beweglichkeit, Verhalten in Ausnahmesituationen, Einhalten von Regeln und Richtlinien, Durchsetzungsvermögen, Aufgeschlossenheit für Neues, Vertreten von Unternehmenszielen         |
| <b>5. Zusammenarbeit</b><br>Informationsverhalten, Unterstützen und Beraten, Einhalten von Absprachen, Anstreben gemeinsamer Lösungen, Kollegialität                                                       | <b>5. Zusammenarbeit</b><br>Informationsverhalten, Unterstützen und Beraten, Einhalten von Absprachen, Anstreben gemeinsamer Lösungen, Kollegialität                                                                                        |

S. 747 Abb. 68



## Häufigste Nutzung der Beurteilungskriterien

| Beurteilungskriterien                            | Häufigkeit<br>[%] |
|--------------------------------------------------|-------------------|
| Fachkenntnisse                                   | 80                |
| Fleiß und Arbeitsweise                           | 74                |
| Verhalten gegenüber Vorgesetzten u. Mitarbeitern | 72                |
| Zuverlässigkeit                                  | 64                |
| Arbeitsqualität                                  | 62                |
| Belastbarkeit                                    | 58                |
| Ausdrucksfähigkeit                               | 54                |
| Arbeitstempo                                     | 54                |
| Organisations- und Planungsvermögen              | 48                |
| Verantwortungsbereitschaft                       | 45                |

S. 748 Abb. 69

Quelle: Olfert, K.: Personalwirtschaft, 10. Auflage, Ludwigshafen (Rhein) 2003, S. 301

Jung, Hans: Personalwirtschaft, 9. Aufl., München 2010.

© Oldenbourg Wissenschaftsverlag

Personalbeurteilung

Kriteriengewichtung  
(Beispiel)

|          |                                                  |                   |        |
|----------|--------------------------------------------------|-------------------|--------|
| <b>A</b> | Ausführende<br>(handwerkliche)<br>Funktionen     | Quantität         | 20 %   |
|          |                                                  | Qualität          | 15 %   |
|          |                                                  | Mittelnutzung     | 5 %    |
|          |                                                  | Selbstständigkeit | 7,5 %  |
| <b>B</b> | Ausführende<br>(Büro -)<br>Funktionen            | Zusammenarbeit    | 7,5 %  |
|          |                                                  | Regelungen        | 5 %    |
|          |                                                  | Quantität         | 10 %   |
|          |                                                  | Qualität          | 15 %   |
| <b>C</b> | Vorgesetzte<br>bis 5 unterstellte<br>Mitarbeiter | Mittelnutzung     | 7,5 %  |
|          |                                                  | Selbstständigkeit | 12,5 % |
|          |                                                  | Zusammenarbeit    | 7,5 %  |
|          |                                                  | Regelungen        | 7,5 %  |
| <b>D</b> | Vorgesetzte<br>ab 6 unterstellte<br>Mitarbeiter  | Quantität         | 7,5 %  |
|          |                                                  | Qualität          | 10 %   |
|          |                                                  | Mittelnutzung     | 7,5 %  |
|          |                                                  | Selbstständigkeit | 10 %   |
|          |                                                  | Zusammenarbeit    | 10 %   |
|          |                                                  | Regelungen        | 5 %    |
|          |                                                  | Führung           | 10 %   |
|          |                                                  | Quantität         | 5 %    |
|          |                                                  | Qualität          | 10 %   |
|          |                                                  | Mittelnutzung     | 7,5 %  |
|          |                                                  | Selbstständigkeit | 10 %   |
|          |                                                  | Zusammenarbeit    | 7,5 %  |
|          |                                                  | Regelungen        | 5 %    |
|          |                                                  | Führung           | 15 %   |

S. 749 Abb. 70





Kriterien für  
Außendienst-  
mitarbeiter mit  
unterschiedlicher  
Gewichtung

|                     |                                                                                               |    |    |   |   |   |
|---------------------|-----------------------------------------------------------------------------------------------|----|----|---|---|---|
| A Arbeitsergebnis   | 1 Wertigkeit der Arbeit<br>(Distribution, Präsentation, öko-<br>nomisches Planen und Handeln) | 15 | 12 | 9 | 6 |   |
|                     | 2 Arbeitsmenge<br>(Aktivitäten im Gesamtbild)                                                 | 15 | 12 | 9 | 6 |   |
| B Arbeitsweise      | 1 Einfluss auf Kunden<br>(Auftreten, Kontaktstärke, Argu-<br>mentation, Durchsetzungsverm.)   | 12 | 10 | 8 | 6 | 4 |
|                     | 2 Arbeitsbereitschaft<br>(Einsatz bei Aufgabenerfüllung,<br>Bereitschaft zur Eigeninitiative) | 12 | 10 | 8 | 6 | 4 |
|                     | 3 Fachliche Kenntnisse<br>(Produkt, Handel, Wettbewerb,<br>Preis)                             | 12 | 10 | 8 | 6 | 4 |
|                     | 4 Zusammenarbeit<br>(Kooperation mit Führungsmit-<br>arbeitern, Team, GH-Reisenden)           | 12 | 10 | 8 | 6 | 4 |
| C Berichte/ Termine | 1 Marktbearbeitung<br>(Kundenpflege, Marktberichte)                                           | 10 | 8  | 6 | 4 | 2 |
|                     | 2 Arbeitsunterlagen<br>(Lieferschein, Tagesbericht,<br>Kartei, Schriftwechsel)                | 10 | 8  | 6 | 4 | 2 |

S. 750 Abb. 71



| Vorteile der Gewichtung                                                                                                                                                                                                                                                                                                                                                                                                                                                             | Nachteile der Gewichtung                                                                                                                                                                                                                                                                                                                                                                                                                                                                                                                                                                                        |
|-------------------------------------------------------------------------------------------------------------------------------------------------------------------------------------------------------------------------------------------------------------------------------------------------------------------------------------------------------------------------------------------------------------------------------------------------------------------------------------|-----------------------------------------------------------------------------------------------------------------------------------------------------------------------------------------------------------------------------------------------------------------------------------------------------------------------------------------------------------------------------------------------------------------------------------------------------------------------------------------------------------------------------------------------------------------------------------------------------------------|
| <ul style="list-style-type: none"><li>• Die Mitarbeiter werden ihr Leistungsverhalten nach den höher gewichteten Kriterien ausrichten. Das Verhalten wird damit steuerbar.</li><li>• Bei der Lohn- und Gehaltsfindung können diejenigen bevorzugt werden, die tatsächlich mehr zum Unternehmenserfolg beigetragen haben.</li><li>• Die Beurteilungsergebnisse können auf breitere Akzeptanz stoßen, wenn die Gewichtung den Wertvorstellungen der Mitarbeiter entspricht.</li></ul> | <ul style="list-style-type: none"><li>• Die Gewichtung ist wissenschaftlich kaum begründbar.</li><li>• Unterschiedliche Gewichtung kann zusätzlichen Konfliktstoff zwischen Beurteiler und Beurteiltem bieten.</li><li>• Sollten zwischen den Beurteilungskriterien Korrelationen bestehen, kann die Gewichtung dazu führen, dass einige Kriterien zu stark in die Gesamtbeurteilung eingehen.</li><li>• Die Wirkung der Gewichtung kann absichtlich oder unbewusst aufgehoben werden, wenn die höher gewichteten Kriterien durch den Vorgesetzten strenger beurteilt werden als geringer gewichtete.</li></ul> |

S. 751 Abb. 72



Verteilungsvorgabe

| Beurteilungs-<br>ergebnis | Prozent-<br>anteil | Mitarbeiteranteil bei einer<br>Mitarbeiteranzahl von |    |    |    |
|---------------------------|--------------------|------------------------------------------------------|----|----|----|
|                           |                    | 5                                                    | 10 | 15 | 25 |
| Sehr gut                  | 7,5 %              | 0                                                    | 1  | 1  | 2  |
| Gut                       | 25 %               | 1                                                    | 2  | 4  | 6  |
| Befriedigend              | 35 %               | 3                                                    | 4  | 5  | 9  |
| Ausreichend               | 25 %               | 1                                                    | 2  | 4  | 6  |
| Unzureichend              | 7,5 %              | 0                                                    | 1  | 1  | 2  |

S. 751 Abb. 73  
Quelle: Olfert, K.: Personalwirtschaft, 10. Auflage, Ludwigshafen (Rhein) 2003, S. 260



| Tätigkeitsbeispiele je Funktionsgruppe (Auszug) |                                                                                                                                             |
|-------------------------------------------------|---------------------------------------------------------------------------------------------------------------------------------------------|
| Funktionsgruppe A                               | Übersetzer, Kassierer, Sachbearbeiter, Bautechniker, Betriebsdolmetscher, Arbeitsverteiler                                                  |
| Funktionsgruppe B                               | Betriebswirtschaftlicher Sachbearbeiter, Fertigungsplaner, Maschinenplaner, Personalplaner, Kostenplaner, Sicherheitsingenieur, Organisator |
| Funktionsgruppe C                               | Gruppenleiter, Hauptgruppenleiter, Meister, Werkstattleiter, Leiter der Reparaturauftragsabwicklung                                         |
| Funktionsgruppe D                               | Registrator, Phonotypistin, Detailkonstrukteur, Grafischer Zeichner, Postbearbeiter, Werkstoffprüfer, Laborant, Versuchstechniker, Operator |
| Funktionsgruppe E                               | Fremdsprachenstenotypistin, Direktionssekretärin, Werksarztsekretärin, Vorstandssekretärin                                                  |

S. 752 Abb. 74



| Beurteilungskriterien je Funktionsgruppe | A | B  | C  | D | E  |
|------------------------------------------|---|----|----|---|----|
| 1. Anwendung von Kenntnissen             | X | X  | X  | X | X  |
| 2. Anwendung manueller Fertigkeiten      |   |    |    | X | X  |
| 3. Selbstständigkeit                     | X |    |    | X | X  |
| 4. Initiative                            |   | X  | X  |   |    |
| 5. Auffassungsgabe                       | X |    |    | X | X  |
| 6. Urteilsvermögen                       |   | X  | X  |   |    |
| 7. Zuverlässigkeit der Arbeitsausführung | X | X  | X  | X | X  |
| 8. Zweckmäßigkeit der Arbeitsweise       | X | X  | X  | X | X  |
| 9. Ausdrucksvermögen                     | X | X  | X  |   | X  |
| 10. Überzeugungsfähigkeit                |   | X  | X  |   |    |
| 11. Einsatzbereitschaft                  | X | X  | X  | X | X  |
| 12. Zusammenarbeit                       | X | X  | X  | X | X  |
| 13. Kontaktpflege                        | X | X  | X  |   | X  |
| 14. Motivierung von Mitarbeitern         |   |    | X  |   |    |
| 15. Einsatz von Mitarbeitern             |   |    | X  |   |    |
| 16. Beurteilung und Förderung            |   |    | X  |   |    |
| 17. Ideenfindung                         |   |    |    |   |    |
| Zahl der Kriterien                       | 9 | 10 | 13 | 8 | 10 |

S. 753 Abb. 75

## Graphische Einstufungsskala

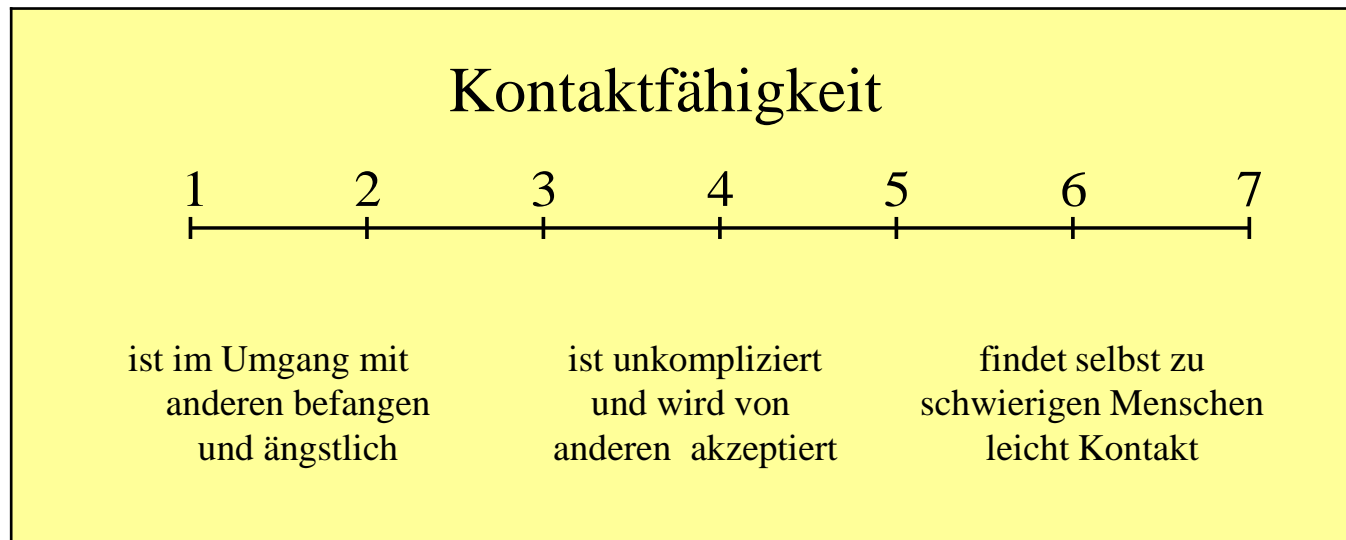

S. 755 Abb. 76

Quelle: Schuler, H.: Beurteilung und Förderung beruflicher Leistung, Stuttgart 1991, S. 20 f.

Jung, Hans: Personalwirtschaft, 9. Aufl., München 2010.

© Oldenbourg Wissenschaftsverlag

## Skalenverfahren (verbale Verankerung)

### Beurteilungskriterium: Qualität der Arbeit

- |        |                                                                                                                                                                                                                                                           |
|--------|-----------------------------------------------------------------------------------------------------------------------------------------------------------------------------------------------------------------------------------------------------------|
| 5 Pkt. | Erledigt seine Aufgaben auch bei hohem Arbeitsumfang und in schwierigen Situationen äußerst zuverlässig und aus eigenem Antrieb. Beseitigt Fehler und ihre Ursachen systematisch. Übernimmt Zusatzaufgaben und unterstützt Mitarbeiter.                   |
| 4 Pkt. | Die gestellten Aufgaben werden auch bei mitunter hohem Arbeitsaufwand zuverlässig aus eigenem Antrieb erledigt. Fehler werden immer erkannt, ihre Ursache meist systematisch beseitigt. Kann teilweise Zusatzaufgaben übernehmen.                         |
| 3 Pkt. | Erledigt seine Aufgaben im allgemeinen gründlich und genau im erwarteten Umfang. Arbeitet zügig ohne ständige Kontrolle durch den Vorgesetzten. Erkennt Fehler und beseitigt sie.                                                                         |
| 2 Pkt. | Ist nicht immer in der Lage, die gestellten Aufgaben mit der erforderlichen Zuverlässigkeit zu erledigen. Die Arbeitsmenge und/oder das Arbeitsergebnis entspricht nur teilweise den Erwartungen. Er muss kontrolliert und auf Fehler hingewiesen werden. |
| 1 Pkt. | Die geforderte Gründlichkeit bei der Aufgabenerledigung entspricht nur selten den Erwartungen. Auch nach wiederholten Hinweisen werden erneut Fehler gemacht.                                                                                             |

S. 755 Abb. 77

Quelle: WestLB: Leitfaden für die Mitarbeiterbeurteilung, Düsseldorf 1987, S. 18

Jung, Hans: Personalwirtschaft, 9. Aufl., München 2010.

© Oldenbourg Wissenschaftsverlag



Kriterien zur Leistungsbeurteilung

| Leistungsbeurteilung für Angestellte |                                                                                                                | Beurteilungsstufen                                          |                                                          |                                                            |                                                     |                                                         |
|--------------------------------------|----------------------------------------------------------------------------------------------------------------|-------------------------------------------------------------|----------------------------------------------------------|------------------------------------------------------------|-----------------------------------------------------|---------------------------------------------------------|
|                                      |                                                                                                                | A                                                           | B                                                        | C                                                          | D                                                   | E                                                       |
| Beurteilungsmerkmale                 | Zu beurteilen z.B. an Hand von:                                                                                | Die Leistung ist für eine Leistungszulage nicht ausreichend | Die Leistung entspricht im Allgemeinen den Anforderungen | Die Leistung entspricht in vollem Umfang den Anforderungen | Die Leistung übertrifft die Anforderungen erheblich | Die Leistung übertrifft die Anforderungen in hohem Maße |
| Arbeitsquantität                     | Umfang des Arbeitsergebnisses, Arbeitsintensität<br>Zeitnutzung                                                | 0                                                           | 7                                                        | 14                                                         | 21                                                  | 28                                                      |
| Arbeitsqualität                      | Fehlerquote, Güte                                                                                              | 0                                                           | 7                                                        | 14                                                         | 21                                                  | 28                                                      |
| Arbeitseinsatz                       | Initiative, Belastbarkeit, Vielseitigkeit                                                                      | 0                                                           | 4                                                        | 8                                                          | 12                                                  | 16                                                      |
| Arbeitssorgfalt                      | Verbrauch u. Behandlung von Arbeitsmitteln aller Art.<br>Zuverlässigem, rationellem, kostenbewussten Verhalten | 0                                                           | 4                                                        | 8                                                          | 12                                                  | 16                                                      |
| Betriebliches Zusammenwirken         | Gemeinsamer Erledigung von Arbeitsaufgaben, Informationsaustausch                                              | 0                                                           | 3                                                        | 6                                                          | 9                                                   | 12                                                      |

S. 756 Abb. 78





Beispiel eines Polaritätsprofils für das Merkmal „soziales Verhalten“

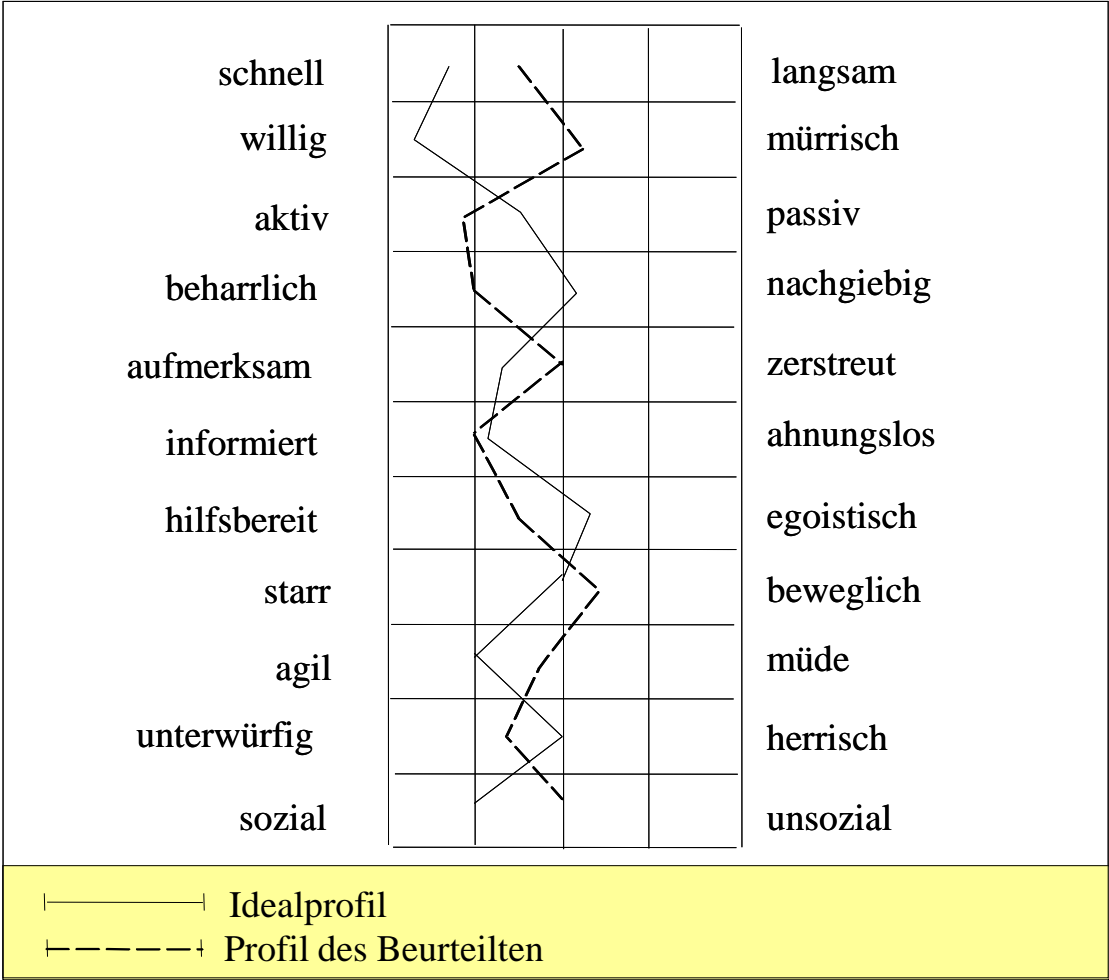

S. 757 Abb. 79



# Rangreihenverfahren

| Beurteilungskriterium: Fachkenntnisse |             |              |
|---------------------------------------|-------------|--------------|
| Beurteilungsordnung:                  | 1. Müller   |              |
|                                       | 2. Schulte  | ← Beurteiler |
|                                       | 3. Grams    |              |
|                                       | 4. Fröhlich |              |
|                                       | 5. Meier    |              |
|                                       | 6. Wacker   |              |

S. 757 Abb. 80



Vorgabevergleichsverfahren

| Personalbeurteilung: Herr Schulte |                |
|-----------------------------------|----------------|
| Beurteilungskriterium             | Zielerreichung |
| Arbeitsqualität                   | 95 %           |
| Fachkenntnisse                    | 110 %          |
| Verantwortungsbereitschaft        | 100 %          |
| Zuverlässigkeit                   | 105 %          |
| Arbeitsplanung                    | 80 %           |
| Arbeitstempo                      | 70 %           |
| Gesamtergebnis                    | 93 %           |

S. 758 Abb. 81



## Kompetenzen des Vorgesetzten

| Kompetenz                                       | Beschreibung                                                                                                                                                                                                                                                                                                                                             |
|-------------------------------------------------|----------------------------------------------------------------------------------------------------------------------------------------------------------------------------------------------------------------------------------------------------------------------------------------------------------------------------------------------------------|
| <b>Menschlichkeit:</b>                          | Freundliches Wesen, das jedem Mitarbeiter ermöglicht, ohne Angst an den Vorgesetzten heranzutreten.                                                                                                                                                                                                                                                      |
| <b>Gerechtigkeit:</b>                           | Keine Bevorzugung. Um Ausgleich bemüht.                                                                                                                                                                                                                                                                                                                  |
| <b>Fachliche Kompetenz:</b>                     | Weiß zumindest in fachlichen Angelegenheiten mindestens genau soviel wie seine Mitarbeiter, bestenfalls sogar etwas mehr. Ist nicht überfordert, wenn sein fachlicher Rat gefragt ist.                                                                                                                                                                   |
| <b>Konfliktfähigkeit:</b>                       | Ist in der Lage, die in der Gruppe bestehenden Konflikte aufzunehmen und sich damit auseinander zusetzen und die durch Konflikte frei werdenden Energien in positive Bahnen zu lenken. Ist unter Umständen auch konsequent und kann möglicherweise in bestimmten Konfliktsituationen für einzelne Gruppenmitglieder un-angenehme Entscheidungen treffen. |
| <b>Entscheidungskompetenz:</b>                  | Ist bereit, Entscheidungen zu treffen und die daraus resultierende Verantwortung zu tragen, auch wenn die Entscheidung möglicherweise stark risikobehaftet ist.                                                                                                                                                                                          |
| <b>Leiter-Funktion bzw. Richtungskompetenz:</b> | Beeinflusst die Richtung der Arbeitsgruppe. Ist zwar zu Dialog und Kompromissen bereit, hat aber die Zügel in der Hand.                                                                                                                                                                                                                                  |
| <b>Organisationsgeschick:</b>                   | Ist in der Lage, auch in Krisensituatio-nen den Überblick zu behalten und die Stresssituation organisatorisch zu bewältigen.                                                                                                                                                                                                                             |
| <b>Motivationsfähigkeit:</b>                    | Besitzt die Gabe, die Gruppe oder einzelne Mitarbeiter für eine Aufgabe zu begeistern. Ist nicht demotivierend durch sein Verhalten. Befähigt die Gruppe, durch sein Verhalten als Team zu arbeiten.                                                                                                                                                     |

S. 760 Abb. 82



Beurteilung eines Vorgesetzten durch seine Mitarbeiter

| Kompetenz                     | Mitarbeiter A |   |       | Mitarbeiter B |   |       | Mitarbeiter C |   |       | Mitarbeiter D |   |       |  |
|-------------------------------|---------------|---|-------|---------------|---|-------|---------------|---|-------|---------------|---|-------|--|
|                               | W             | N | (W·N) |  |
| Menschlichkeit                | 7             | 8 | 56    | 3             | 3 | 9     | 8             | 7 | 56    | 7             | 8 | 56    |  |
| Gerechtigkeit                 | 8             | 3 | 24    | 4             | 6 | 24    | 7             | 6 | 42    | 8             | 7 | 56    |  |
| Fachliche Kompetenz           | 5             | 6 | 30    | 7             | 8 | 56    | 2             | 5 | 10    | 4             | 3 | 12    |  |
| Konfliktfähigkeit             | 6             | 3 | 18    | 2             | 5 | 10    | 3             | 5 | 15    | 2             | 4 | 8     |  |
| Entscheidungskompetenz        | 2             | 4 | 8     | 5             | 5 | 25    | 4             | 5 | 20    | 3             | 4 | 12    |  |
| Leiter-Funktion               | 1             | 1 | 1     | 6             | 2 | 12    | 5             | 5 | 25    | 1             | 3 | 3     |  |
| Organisationsgeschick         | 4             | 4 | 16    | 8             | 8 | 64    | 1             | 6 | 6     | 5             | 5 | 25    |  |
| Motivationsfähigkeit          | 3             | 6 | 18    | 1             | 6 | 6     | 7             | 7 | 49    | 6             | 4 | 24    |  |
| Summe                         |               |   | 171   |               |   | 206   |               |   | 223   |               |   | 196   |  |
| Kennzahl (Division durch 288) |               |   | 0,59  |               |   | 0,72  |               |   | 0,77  |               |   | 0,68  |  |
| W = Wertigkeit; N = Noten     |               |   |       |               |   |       |               |   |       |               |   |       |  |

S. 761 Abb. 83



## Fehlerquellen bei der Beurteilung

### • Wahrnehmungsfehler

**Wahrnehmungsprozess ist geprägt durch:**

- Erwartungen
- Vorstellungen
- Sympathie
- Antipathie

- **Bewertungsfehler:**

- (1) Kontakt-Effekt

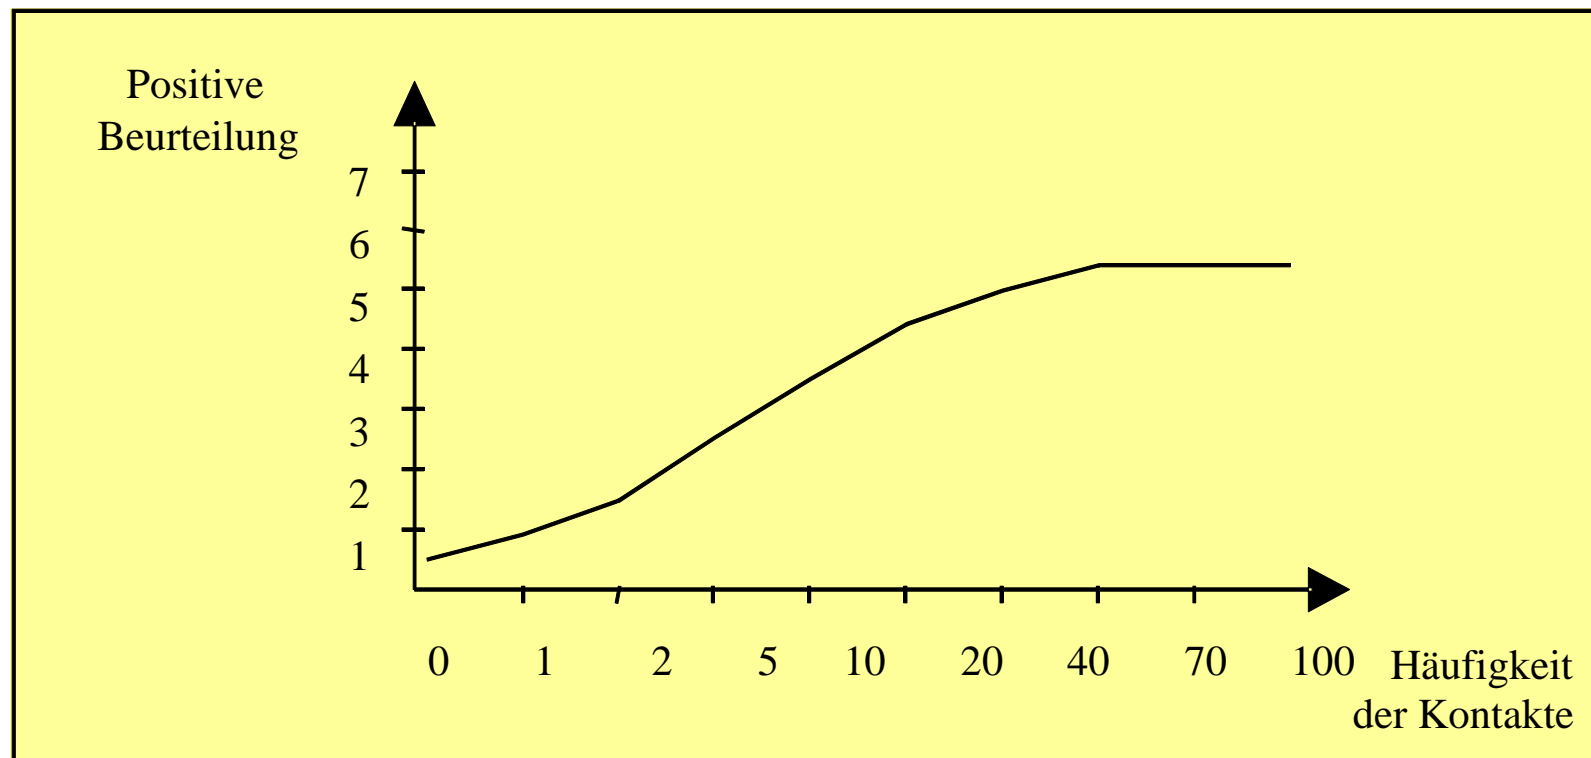

S. 767 Abb. 84

Jung, Hans: Personalwirtschaft, 9. Aufl., München 2010.

© Oldenbourg Wissenschaftsverlag

(2) Hierarchie-Effekt

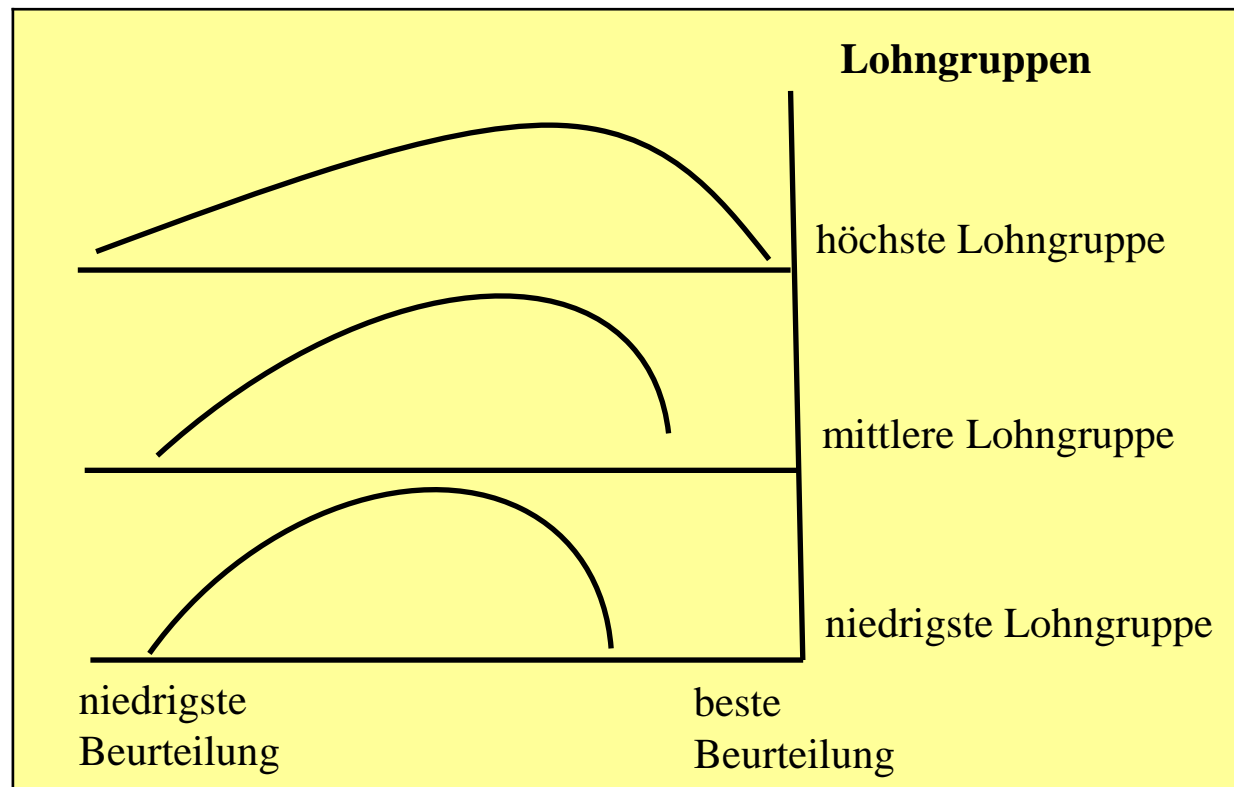

S. 768 Abb. 85

Jung, Hans: Personalwirtschaft, 9. Aufl., München 2010.

© Oldenbourg Wissenschaftsverlag





### (3) Weitere Bewertungsfehler:

- Halo-Effekt oder Überstrahlungs-Effekt
- Einseitigkeitseffekt
- Übernahmefehler
- Kontakt-Effekt
- „Nikolaus-Effekt“
- Berücksichtigung von Beurteilungskonsequenzen
- Bezugspersonen-Effekt
- Sympathie und Antipathie
- Hierarchie-Effekt
- Andorra-Phänomen
- Kleber-Effekt

S. 766 ff.



- **Konstanzfehler:**

sind Fehler die auf die Persönlichkeitsstruktur des Beurteilers zurück zuführen sind.

Man unterscheidet folgende verschiedene Typen:

- milde Beurteiler
- strenge Beurteiler
- vorsichtige Beurteiler
- extreme Beurteiler

(1) Normalverteilung

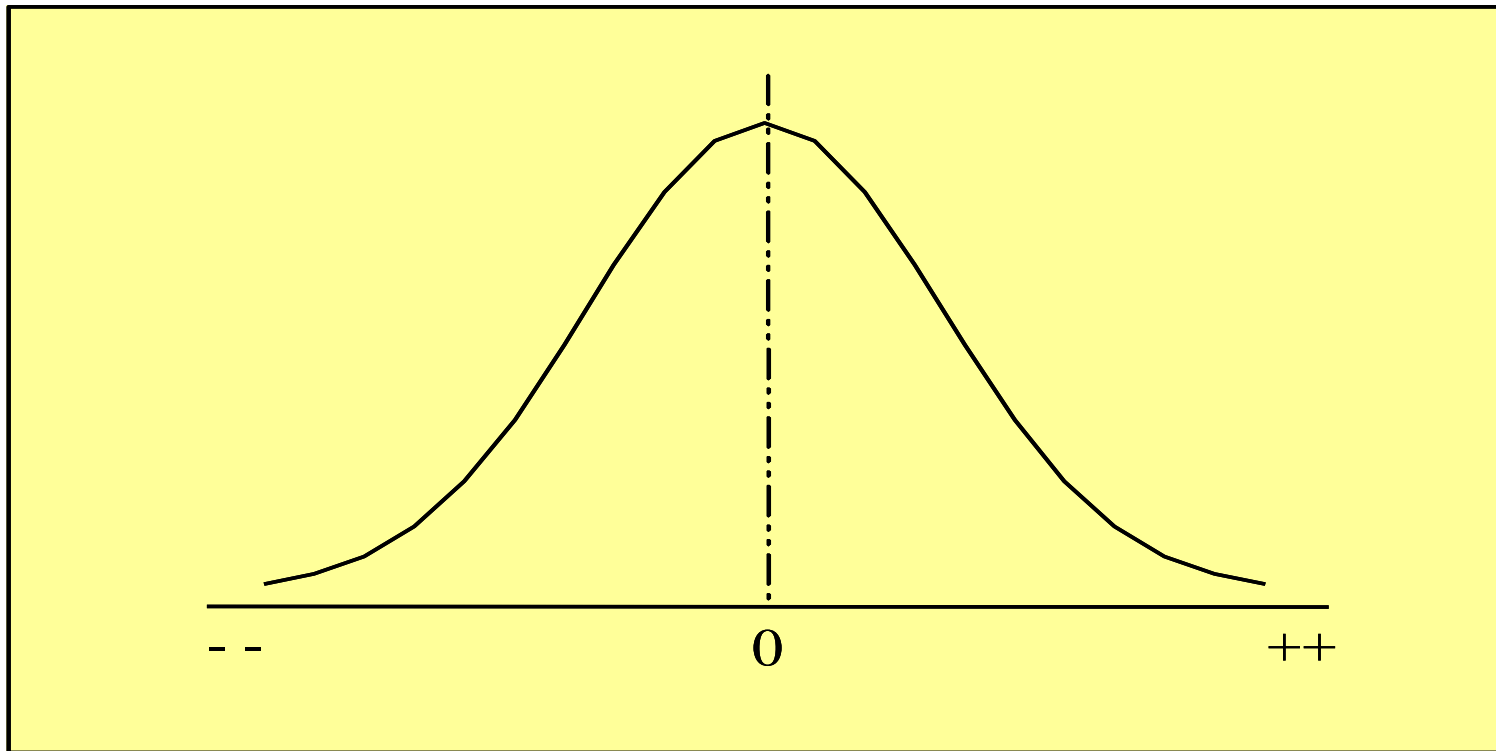

S. 769 Abb. 86

Jung, Hans: Personalwirtschaft, 9. Aufl., München 2010.

© Oldenbourg Wissenschaftsverlag

(2) Tendenz zur Milde

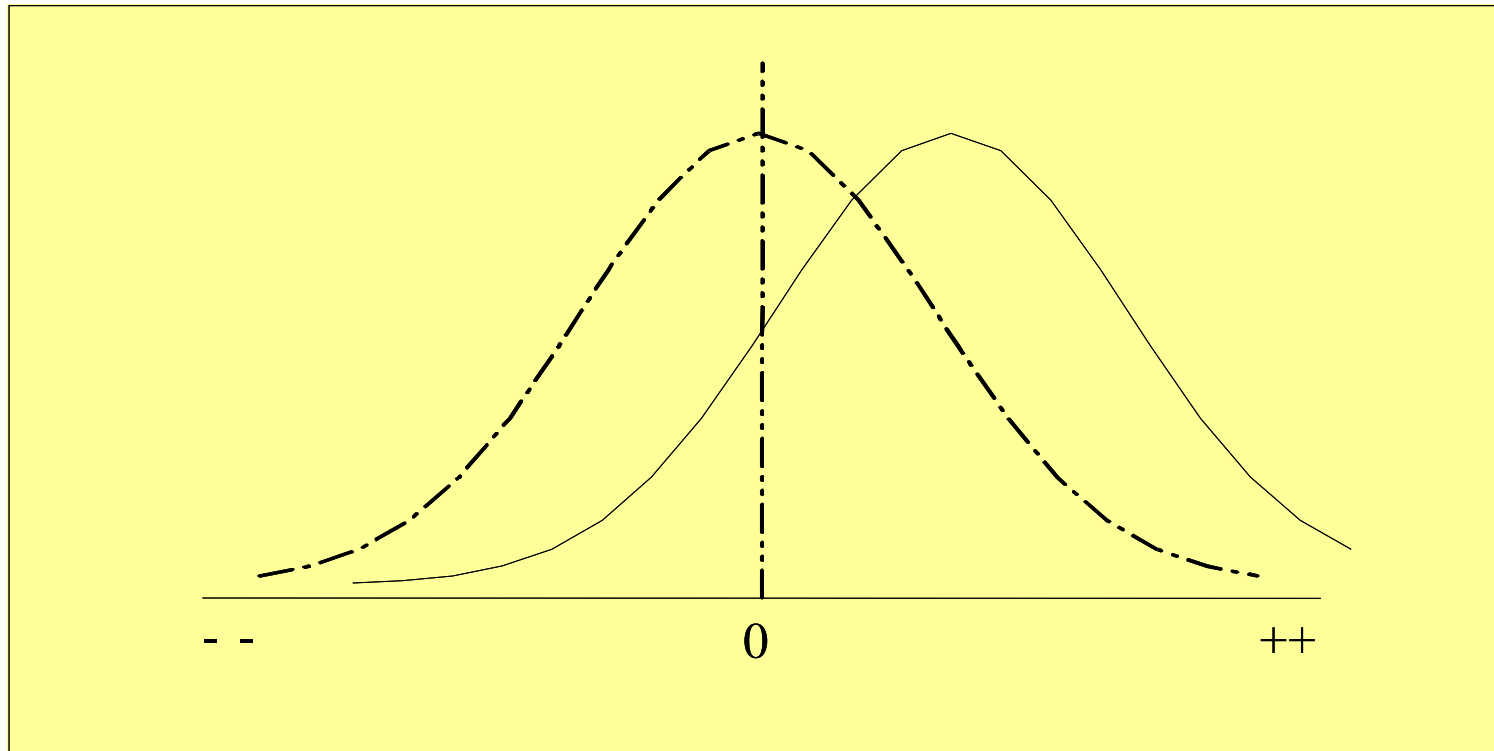

S. 769 Abb. 87

Jung, Hans: Personalwirtschaft, 9. Aufl., München 2010.

© Oldenbourg Wissenschaftsverlag

(3) Tendenz zur Strenge

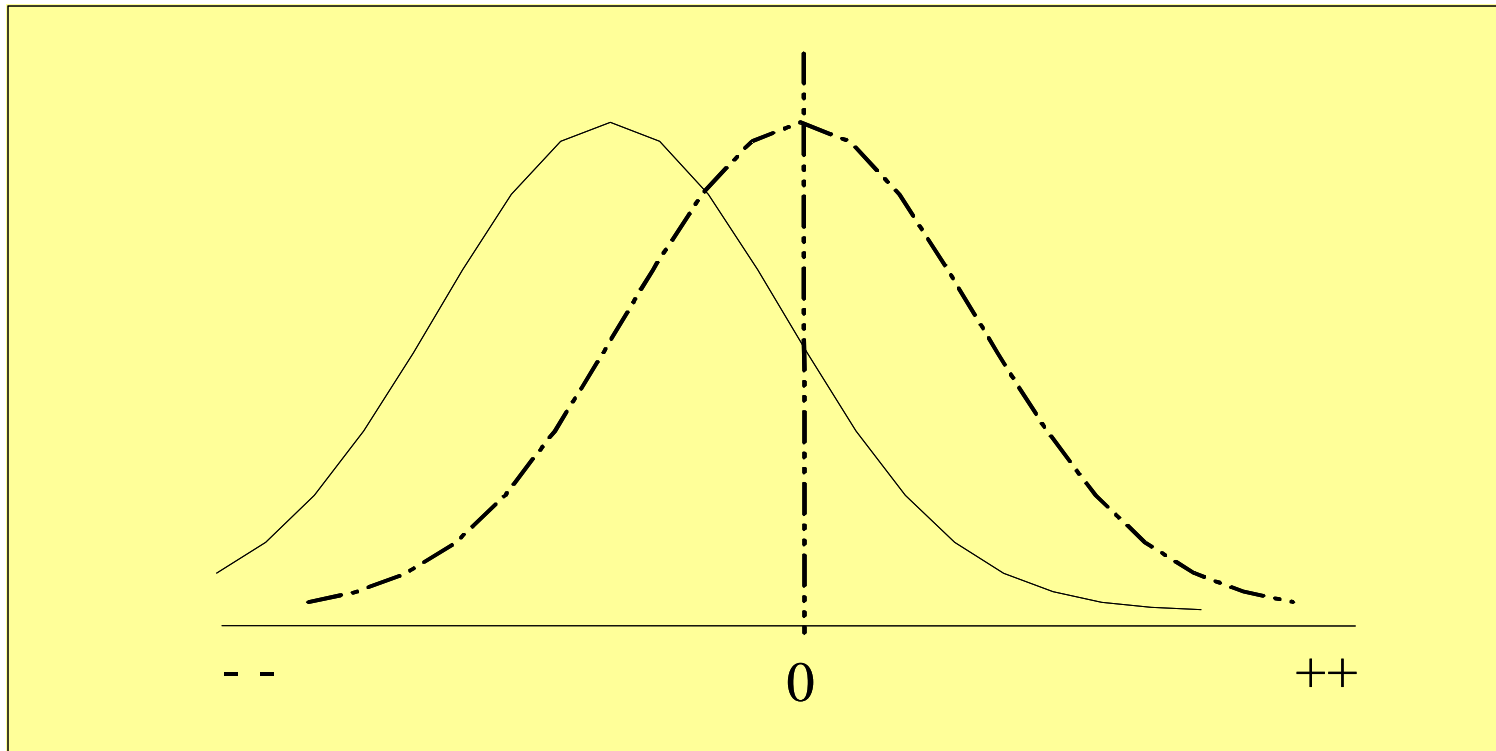

S. 770 Abb. 88

Jung, Hans: Personalwirtschaft, 9. Aufl., München 2010.

© Oldenbourg Wissenschaftsverlag

(4) Tendenz zur Mitte

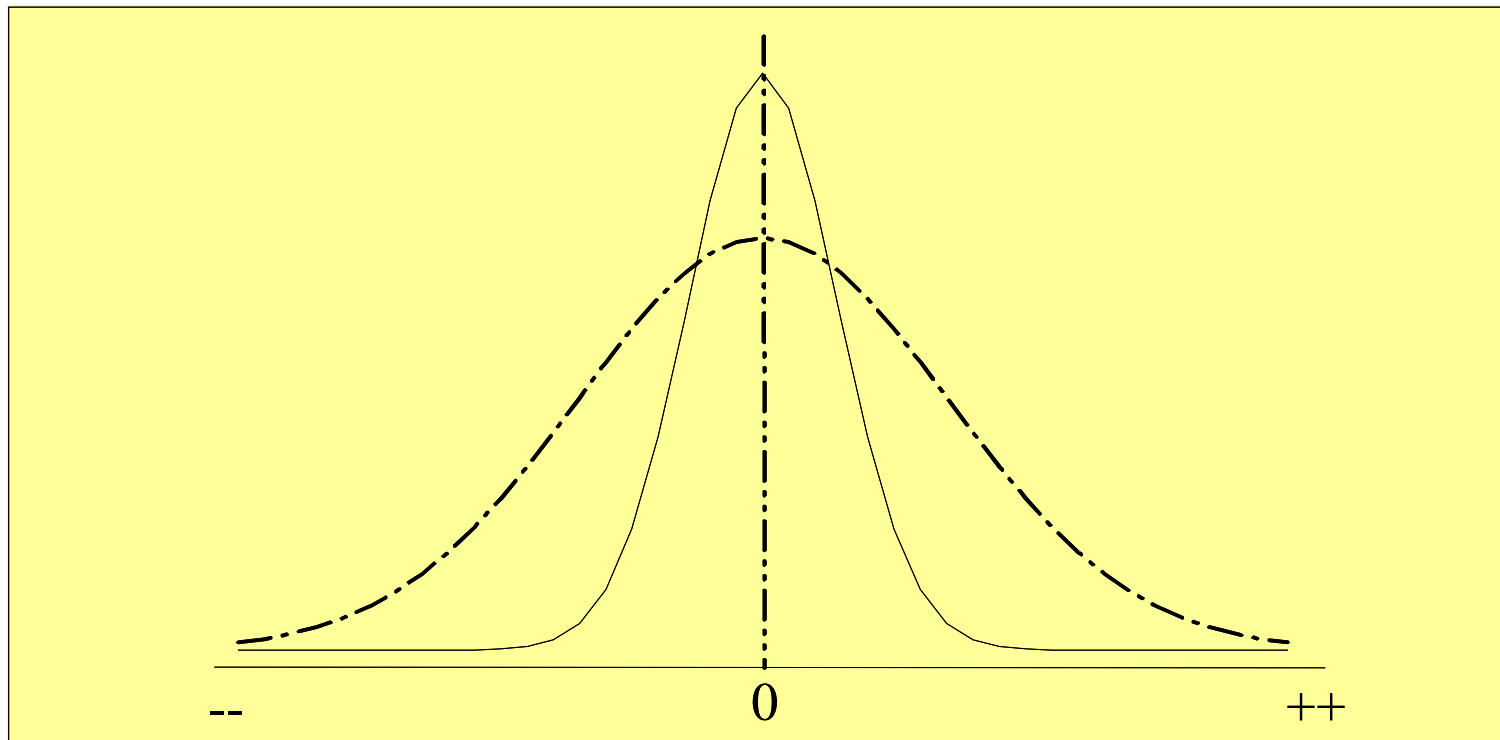

S. 770 Abb. 89

Jung, Hans: Personalwirtschaft, 9. Aufl., München 2010.

© Oldenbourg Wissenschaftsverlag

(5) Tendenz zu Extremwerten

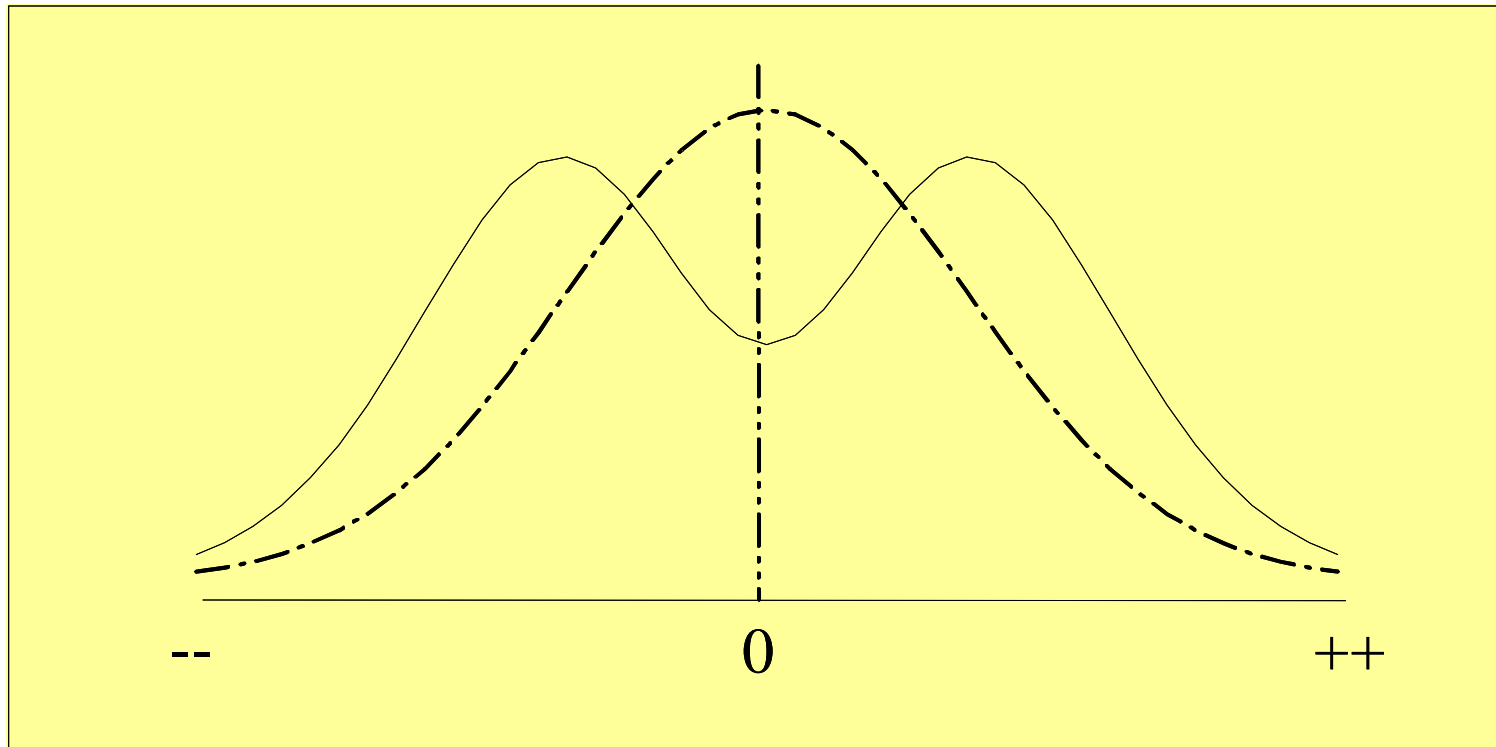

S. 771 Abb. 90

Jung, Hans: Personalwirtschaft, 9. Aufl., München 2010.

© Oldenbourg Wissenschaftsverlag

## Durchführungsphasen der Personalbeurteilung

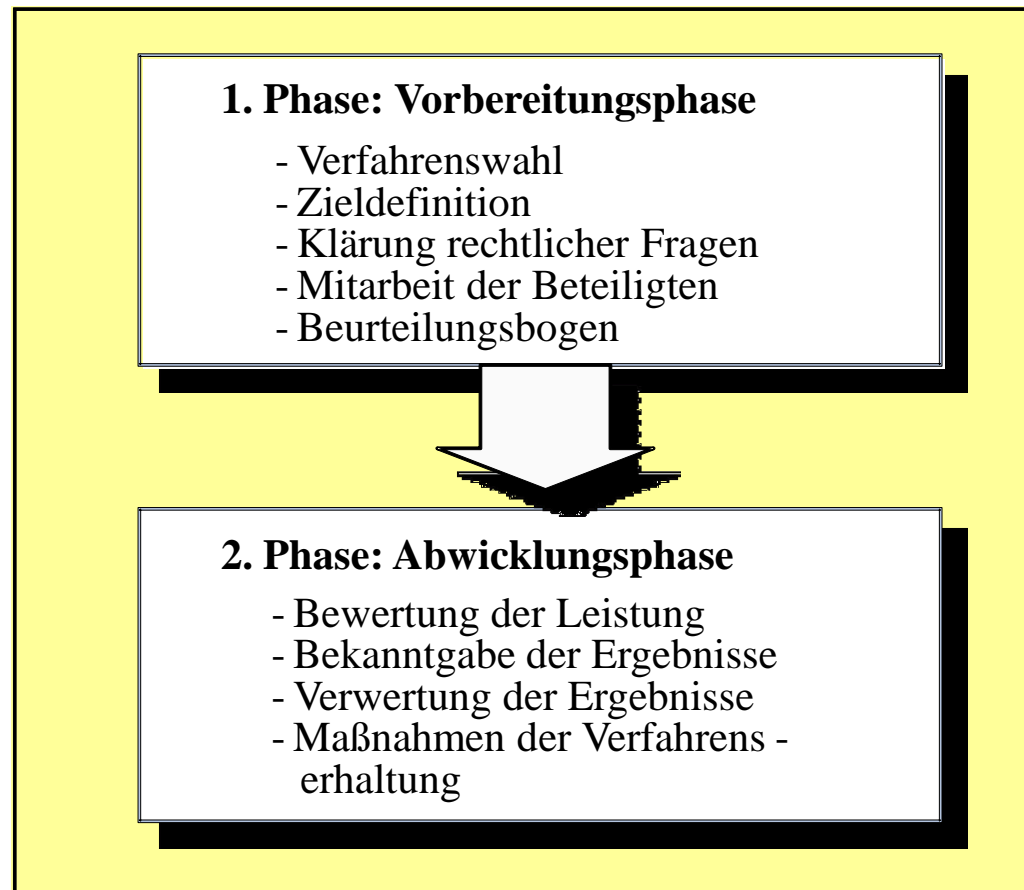

S. 773 Abb. 91





# Prozentuale Verteilung der Leistungszulagen in Leistungsstufe

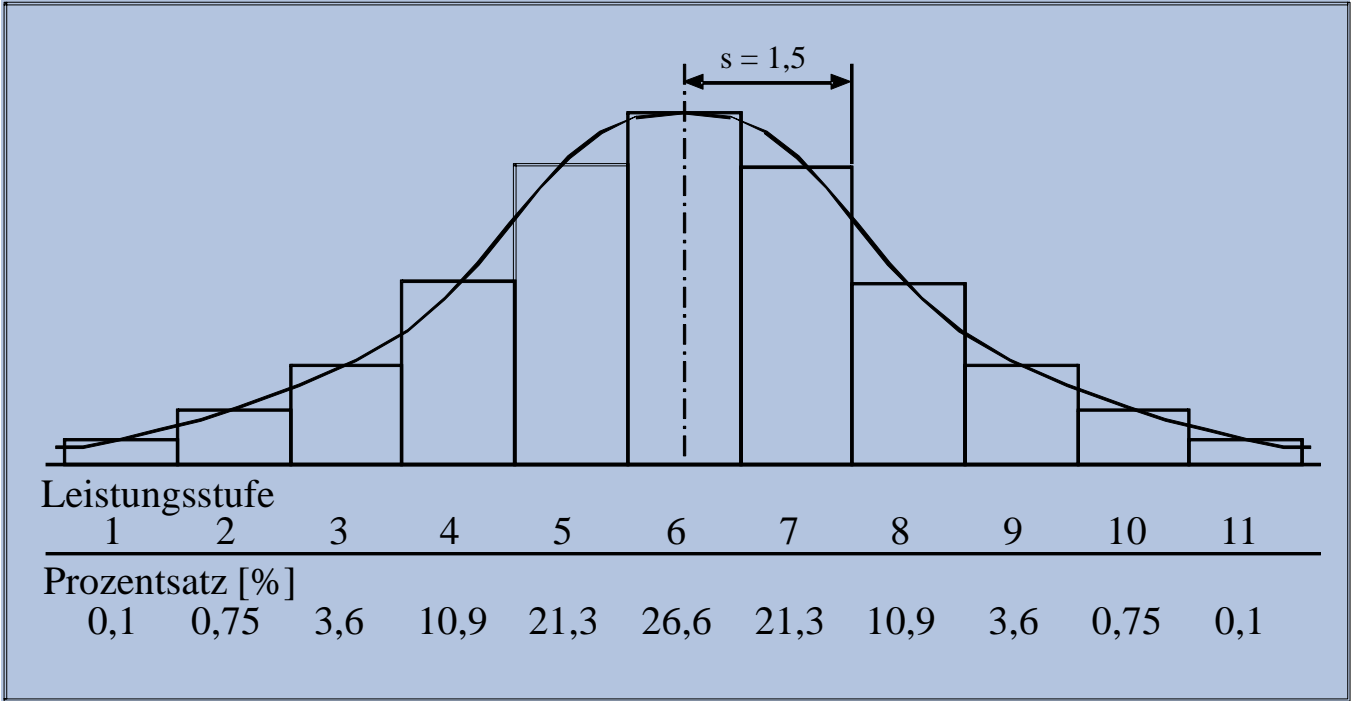

S. 781 Abb. 92



| Vorteile der Personalbeurteilung:                                                                                                                                                                                                                                                                                                                                                                                                                                                                                                                                                                                                    | Nachteile der Personalbeurteilung:                                                                                                                                                                                                                                                                                                                                                                                                                                                                                                                                           |
|--------------------------------------------------------------------------------------------------------------------------------------------------------------------------------------------------------------------------------------------------------------------------------------------------------------------------------------------------------------------------------------------------------------------------------------------------------------------------------------------------------------------------------------------------------------------------------------------------------------------------------------|------------------------------------------------------------------------------------------------------------------------------------------------------------------------------------------------------------------------------------------------------------------------------------------------------------------------------------------------------------------------------------------------------------------------------------------------------------------------------------------------------------------------------------------------------------------------------|
| <ul style="list-style-type: none"><li>• Größere Arbeitsproduktivität durch Mehrleistung</li><li>• Gerechtere leistungsabhängige Entlohnung</li><li>• Leistungsbeurteilung ist wichtiges Führungsinstrument</li><li>• Führungskräfte sind gezwungen, sich mit der Leistung ihrer Mitarbeiter zu befassen</li><li>• Zielorientiertes Handeln wird gefördert</li><li>• Gezielte Anleitung zur Leistungssteigerung möglich</li><li>• Über- und Unterforderungen werden sichtbar</li><li>• Gezielter Einsatz der Mitarbeiter möglich</li><li>• Mitarbeiter können die Höhe des Leistungsgehaltes kontrollieren und beeinflussen</li></ul> | <ul style="list-style-type: none"><li>• Höherer Personalaufwand</li><li>• Höherer Arbeitsaufwand für Führungskräfte</li><li>• Höhere Ausbildungskosten durch Schulung der Führungskräfte</li><li>• Falsche Beurteilungen können Schaden verursachen</li><li>• Mögliches Spannungsverhältnis zwischen Mitarbeiter und Vorgesetztem</li><li>• Teamarbeit kann durch Leistungskonkurrenz geschädigt werden</li><li>• Versetzungen von Mitarbeiter auf gleicher Ebene werden erschwert, weil sie ihre Leistungszulagen in der neuen Arbeitsgruppe "verteidigen" müssen</li></ul> |

S. 782 Abb. 93

## 5. Arbeitszeugnisse

- 5.1 Gesetzliche Grundlagen
- 5.2 Richtlinien zu Form und Inhalt von Zeugnissen
- 5.3 Zeugnisarten
- 5.4 Die Zeugnissprache
- 5.5 Beurteilung
- 5.6 Verschlüsselungstechniken
- 5.7 Hilfsmittel zur Zeugniserstellung
- 5.8 Beispielzeugnisse und Analyse

*Arbeitsbescheinigung*

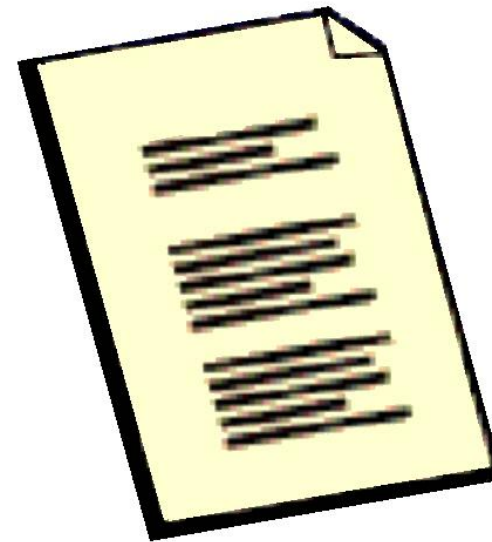

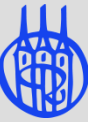

## Die Problematik des Arbeitszeugnisses

Die Problematik eines Arbeitszeugnisses kann sich dadurch ergeben, dass:

- der ausstellende Arbeitgeber aus Unkenntnis der in der Praxis üblichen Formulierungen durch eine falsche Wortwahl eine andere Beurteilung abgibt, als er eigentlich will,
- der Arbeitgeber einem Mitarbeiter, mit dem er unzufrieden war, ein bewusst geschöntes Zeugnis ausstellt, um ihn "wegzuloben",
- Zeugnisse aus Angst vor einer möglichen Klage vor dem Arbeitsgericht eher zu positiv als zu negativ formuliert werden,
- Mitarbeitern, die z.B. aufgrund einer schlechten Auftragslage entlassen werden mussten, die Suche nach einer neuen Stelle erleichtert werden soll und
- die Personalsachbearbeiter eines suchenden Unternehmens die Zeugnisse falsch interpretieren, weil sie nicht mit der "Zeugnissprache" vertraut sind.



## Maßgebliche Aussagen und Inhalte der rechtlichen Anspruchsgrundlage

(Auf die Erteilung von Arbeitszeugnissen nach Beendigung eines Beschäftigungsverhältnisses)

1. Der Anspruch auf die Ausstellung eines Arbeitszeugnisses ist zwingendes Recht.
2. Der Arbeitnehmer muss jedoch ein Verlangen äußern (Ausnahme: Ausbildungsverhältnis).
3. Die Aufnahme der Beurteilung von Führung und Leistung setzt ein zusätzliches Verlangen voraus.
4. Geheimcodes dürfen nicht verwendet werden.

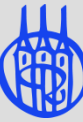

## Inhalte der Anspruchsgrundlage auf ein Arbeitszeugnis

1. Der Anspruch auf die Ausstellung eines Arbeitszeugnisses ist zwingendes Recht.
2. Der Arbeitnehmer muss jedoch ein Verlangen äußern (Ausnahme: Ausbildungsverhältnis).
3. Die Aufnahme der Beurteilung von Führung und Leistung setzt ein zusätzliches Verlangen voraus.
4. Geheimcodes dürfen nicht verwendet werden.



## Form von Arbeitszeugnissen

- Das Zeugnis wird in Schriftform erstellt (Maschinenschrift).
- Es ist ein gutes Qualitätspapier zu verwenden (i.d.R. Geschäftsbogen).
- Üblich ist das Format DIN A4 (mindestens aber DIN A5).
- Der Umfang des Zeugnisses sollte zwei Seiten nicht übersteigen.
- Nachträgliche Verbesserungen bzw. Änderungen sind nicht zulässig.
- Die Wortwahl soll klar und deutlich sein.
- Das Zeugnis wird (auch bei ausländischen Arbeitnehmern) in deutscher Sprache erstellt.

## Die äußere Form von Arbeitszeugnissen

|                                                                                                                     |                                                                                                                                           |
|---------------------------------------------------------------------------------------------------------------------|-------------------------------------------------------------------------------------------------------------------------------------------|
| <b>Jakob Müller GmbH</b>                                                                                            |                                                                                                                                           |
| <u>L. Müller GmbH Mühlenweg 12 12345 Waldhausen</u><br>Herrn<br>Heinrich Meier<br>Marktstr. 147<br>12345 Waldhausen | Mühlenweg 12<br>12345 Waldhausen<br>Telefon: (09876) 12345<br>Telefax: (09876) 34567<br>Konto: Voba Waldhausen<br>(440 400 00) 12 003 444 |
| Ihr Zeichen                                                                                                         | Ihre Nachricht vom                                                                                                                        |
| Mein Zeichen JM                                                                                                     | Datum 01.01.20??                                                                                                                          |
| <h2 style="margin: 0;">ZEUGNIS</h2>                                                                                 |                                                                                                                                           |
| Herr : Dipl.-Wirt.Ing. Heinrich Meier<br>geb. am : 05.05.1955<br>in : Hamburg<br>war in der Zeit vom .....          |                                                                                                                                           |
| <div style="border: 1px solid black; width: 100px; height: 100px; margin: 0 auto;"></div> <p>(Zeugnistext)</p>      |                                                                                                                                           |
| <hr style="width: 50%; margin: 0 auto;"/> <p>Unterschrift</p>                                                       |                                                                                                                                           |

S. 789 Abb. 95



## Zeugnisarten

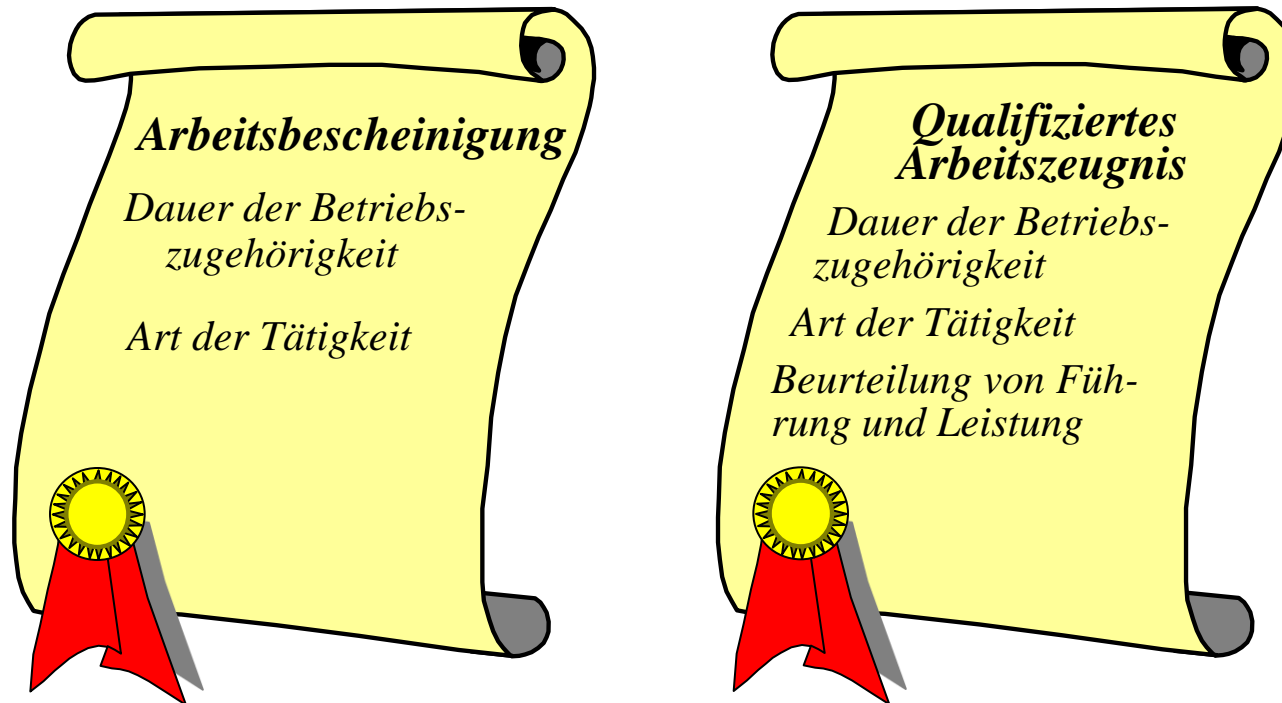

S. 792 Abb. 96

Jung, Hans: Personalwirtschaft, 9. Aufl., München 2010.

© Oldenbourg Wissenschaftsverlag



## Das einfache Zeugnis

### **Folgende Daten muss das einfache Zeugnis enthalten:**

- Name, Vorname
- Akademische und öffentlich-rechtliche Titel
- Art und Dauer des Beschäftigungsverhältnisses
- Ausscheiden
- Firma, Datum, Unterschrift.

Hinzugefügt werden können das Geburtsdatum und der Geburtsort.



## Das qualifizierte Zeugnis

### **Folgende Daten muss das qualifizierte Zeugnis enthalten:**

- Geschäftsbogen mit voller Adresse des zeugnisausstellenden Unternehmens
- Überschrift (z.B. Endzeugnis oder Zwischenzeugnis)
- Persönliche Daten des Zeugnisberechtigten
- Dauer der Beschäftigung (Eintritts- und Ausscheidungsdatum)
- Beschreibung der Tätigkeiten in chronologischer Reihenfolge
- Kenntnisse und Erfahrungen des Arbeitnehmers auf den ihm zugewiesenen Arbeitsplätzen
- Beurteilung der Leistungen des Arbeitnehmers
- Besuchte Fortbildungsveranstaltungen
- Beurteilung der Führung (Verhalten gegenüber Vorgesetzten und Mitarbeitern)
- Beurteilung der Führungsfähigkeit
- Angabe über Auflösung des Arbeitsverhältnisses
- Schlussformel mit Bedauern über Ausscheiden, Dank für geleistete Dienste, Wünsche für die Zukunft
- Ausstellungsort, Datum und Unterschrift

## Das Zwischenzeugnis

Das Zwischenzeugnis entspricht inhaltlich dem Endzeugnis, nur ist das Beschäftigungsverhältnis nicht aufgehoben.

### **Gründe für die Erstellung eines Zwischenzeugnisses sind:**

- Versetzung innerhalb des Unternehmens
- Wechsel des Vorgesetzten
- Vertragsangebot eines anderen Unternehmens liegt vor
- Veränderungen im Unternehmensgefüge mit Auswirkungen auf das Arbeitsverhältnis
- Ende der Probezeit



Redewendungen der „Zeugnissprache“

| Formulierung (Beispiele)                                                                                  | Bedeutung                                                                       |
|-----------------------------------------------------------------------------------------------------------|---------------------------------------------------------------------------------|
| Er hat alle Arbeiten ordnungsgemäß erledigt.                                                              | Er ist ein Bürokrat ohne Eigeninitiative.                                       |
| Er erledigte alle Arbeiten mit großem Fleiß und Interesse.                                                | Er war zwar eifrig, aber nicht besonders tüchtig.                               |
| Wegen seiner Pünktlichkeit war er stets ein gutes Vorbild.                                                | Seine Leistung war unterdurchschnittlich; er war in jeder Hinsicht unbrauchbar. |
| Er ist ein zuverlässiger/gewissenhafter Mitarbeiter.                                                      | Er ist zur Stelle, wenn man ihn braucht, aber er ist nicht immer brauchbar.     |
| Er hat sich im Rahmen seiner Fähigkeiten eingesetzt.                                                      | Er hat getan, was er konnte, aber das war nicht viel.                           |
| Er war immer mit Interesse bei der Sache.                                                                 | Er hat sich angestrengt, aber nichts geleistet.                                 |
| Er zeigte für seine Arbeit Verständnis.                                                                   | Er war faul und hat nichts geleistet.                                           |
| Er verfügt über Fachwissen und zeigt ein gesundes Selbstvertrauen.                                        | Geringes Fachwissen, das mit "großer Klappe" übertüncht werden soll.            |
| Er hat sich bemüht, seinen Aufgaben gerecht zu werden.                                                    | Guter Wille, mehr aber nicht. Ungenügende Leistung.                             |
| Er erledigte die ihm übertragenen Aufgaben mit Fleiß und war stets willens, sie termingerecht zu beenden. | Absolut unzureichende Leistung.                                                 |
| Mit seinen Vorgesetzten ist er gut zurechtgekommen.                                                       | Er ist ein Mitläufer und Jasager, der sich gut anpasst.                         |

S. 795 Abb. 97A  
(in Anlehnung an: Friedrich, H.: Zeugnisse im Beruf. Richtig schreiben, richtig verstehen, Niedernhausen 1991, S. 89 ff. und Lucas, M.: Arbeitszeugnisse richtig deuten, 11. Aufl., Düsseldorf 1991, S. 127 ff)



(Fortsetzung)

| Formulierung (Beispiele)                                                                                                                                                                                        | Bedeutung                                                                              |
|-----------------------------------------------------------------------------------------------------------------------------------------------------------------------------------------------------------------|----------------------------------------------------------------------------------------|
| Er war tüchtig und wusste sich gut zu verkaufen.                                                                                                                                                                | Er ist ein unangenehmer Mitarbeiter.                                                   |
| Wir lernten ihn als umgänglichen Kollegen kennen.                                                                                                                                                               | Er ging vielen Mitarbeitern auf die Nerven; er war schlecht gelitten.                  |
| Er galt im Kollegenkreis als toleranter Mitarbeiter.                                                                                                                                                            | Den Vorgesetzten gegenüber war sein Verhalten mangelhaft.                              |
| Durch seine Geselligkeit trug er zur Verbesserung des Betriebsklimas bei.                                                                                                                                       | Er neigt zu übertriebenem Alkoholkonsum.                                               |
| Er/sie bewies für die Belange der Kolleginnen/Kollegen stets Einfühlungsvermögen.                                                                                                                               | Er/sie sucht sexuelle Kontakte bei Betriebsangehörigen.                                |
| Wir haben ihn als einsatzwilligen und sehr beweglichen Mitarbeiter kennengelernt, der stets bemüht war, die ihm übertragenen Aufgaben zur vollsten Zufriedenheit in seinem und im Interesse der Firma zu lösen. | Umschreibung dafür, dass der Mitarbeiter sehr geschickt den Arbeitgeber bestohlen hat. |
| Wir bestätigen gerne, dass Herr XY mit Fleiß, Ehrlichkeit und Pünktlichkeit an seine Aufgaben herangegangen ist.                                                                                                | Aber leider ohne jegliche fachliche Qualifikation.                                     |
| Wir schätzten ihn als einen eifrigen Mitarbeiter, der die ihm gemäßen Aufgaben schnell und sicher bewältigte.                                                                                                   | "Ihm gemäß" waren jedoch nur die anspruchslosen Aufgaben.                              |

S. 795 Abb. 97B  
(in Anlehnung an: Friedrich, H.: Zeugnisse im Beruf. Richtig schreiben, richtig verstehen, Niedernhausen 1991, S. 89 ff. und Lucas, M.: Arbeitszeugnisse richtig deuten, 11. Aufl., Düsseldorf 1991, S. 127 ff)



Einleitungssatz:

|                               |                                                                                                                                                        |
|-------------------------------|--------------------------------------------------------------------------------------------------------------------------------------------------------|
| <b>Aktive Formulierung</b>    | „Herr Dipl.-Ing. K., geboren am 07.12.1980 in Berlin, war in der Zeit vom 01.01. 2002 bis 30.12.2010 in unserem Hause als Vertriebsingenieur tätig.“   |
| <b>Wertfreie Formulierung</b> | „Frau G., geboren am 03.03.1974 in Viersen, trat am 01.10.2006 als Sekretärin in unser Unternehmen ein.“                                               |
| <b>Passive</b>                | „Frau S., geboren am 16.08.1961 in Bitterfeld, wurde vom <b>Formulierung</b> 01.04.2005 bis 30.03.2010 in unserer Firma als Telefonistin beschäftigt.“ |
| <b>Bei längeren</b>           | „Das Arbeitsverhältnis mit Herrn J. dauerte vom 01.07.1998bis <b>Fehlzeiten</b> 31.12.2010.“<br>(Fehlzeiten dürfen nicht offenerwähnt werden.)         |

Aufgabenbeschreibung:

|                                  |                                                                                                                                                                                        |
|----------------------------------|----------------------------------------------------------------------------------------------------------------------------------------------------------------------------------------|
| <b>Bei guter Leistung</b>        | „Her F. bediente in seiner Position eine Drehmaschine und fertigte Präzisionsteile aus Stahl und Messing. Er war für die Einrichtung und Wartung der Maschine autonom verantwortlich.“ |
| <b>Bei ungenügender Leistung</b> | „Her F. fand Verwendung als Maschinenführer.“                                                                                                                                          |

S. 796 Abb. 98/99



| Beruf/<br>Berufsgruppe                          | Wichtige Beurteilungskriterien                                                                                                                                                                           |
|-------------------------------------------------|----------------------------------------------------------------------------------------------------------------------------------------------------------------------------------------------------------|
| Fabrikarbeiter,<br>angelernte Kräfte            | Arbeitstempo, Arbeitsgüte und -menge, Zuverlässigkeit, Auffassungsgabe, soziales Verhalten                                                                                                               |
| Auszubildende                                   | Auffassungsgabe, Lernwilligkeit, Fleiß, Arbeitsverhalten, Ordnung, Pünktlichkeit, Einsatzbereitschaft, Initiative, Berichtsheft, soziales Verhalten                                                      |
| Facharbeiter,<br>Handwerker                     | Geschicklichkeit, Sorgfalt, Fachkenntnisse und -wissen, Arbeitsplanung, Selbstständigkeit, Arbeitsgüte und -menge, Verhalten gegenüber Gleichgestellten und Vorgesetzten                                 |
| Vorarbeiter, Meister                            | Fachbeherrschung, Menschenkenntnis, Verantwortungsbewusstsein, Organisationsgabe, soziales Verhalten, Umgangsformen, Urteilsvermögen, Selbstständigkeit, Führungseigenschaften, pädagogische Fähigkeiten |
| Kaufmann,<br>Verkäufer, Vertreter,<br>Reisender | Verhandlungsgeschick, Kontaktfähigkeit, Menschenkenntnis, Umgangsformen, Selbstvertrauen, Vertrauenswürdigkeit, Fachkenntnisse, Gedächtnis, Sprache, Intelligenz, Aufmerksamkeit, Initiative, Äußeres    |

S. 797 Abb. 100A





(Fortsetzung)

| Beruf/<br>Berufsgruppe | Wichtige Beurteilungskriterien                                                                                                                                                                                                                                                                     |
|------------------------|----------------------------------------------------------------------------------------------------------------------------------------------------------------------------------------------------------------------------------------------------------------------------------------------------|
| Buchhalter             | Sorgfalt, Ordnung, Fachwissen, Verantwortungsbewusstsein, Umgang mit Zahlen, Ausdauer, Selbstvertrauen, Zuverlässigkeit                                                                                                                                                                            |
| Kassierer              | Ehrlichkeit, Vertrauenswürdigkeit, Zuverlässigkeit, Sorgfalt, Konzentrationsfähigkeit, Umgangsformen, Merkfähigkeit, Einsatzbereitschaft, Menschenkenntnis                                                                                                                                         |
| Ingenieur              | Urteilsvermögen, Dispositionsvermögen, Organisationsgabe, Denkvermögen, Fachkenntnisse, Menschenkenntnis, Führungseigenschaften, Kostendenken, schöpferische Begabung, Entschlussfähigkeit, Zusammenarbeit, Berufserfahrung, Intelligenz                                                           |
| Führungskraft          | Führungseigenschaften, Motivationsfähigkeit, pädagogische Fähigkeiten, Verhandlungsgeschick, Kontaktfähigkeit, Organisationsgabe, Menschenkenntnis, Dispositionsvermögen, Belastbarkeit, Entscheidungsfreudigkeit, Vorbildrolle, Kreativität, analytisches Denken, Aufgeschlossenheit, Kooperation |

S. 797 Abb. 100B

## Leistungsbeurteilung

### Gesamtbeurteilung:

- a) **Sehr Gut:** „Er (sie) hat die ihm (ihr) übertragenen Aufgaben **stets** zu unserer **vollsten** Zufriedenheit erledigt.“

Folgende Formulierungen drücken ebenfalls sehr gute Leistungen aus:

- „Seine Leistungen haben in jeder Hinsicht unsere volle Anerkennung gefunden.“
- „Er hat unsere Erwartungen immer und in allerbesten Weise erfüllt.“
- „Seine Leistungen waren stets sehr gut.“

- b) **Gut:** „Er (sie) hat die ihm (ihr) übertragenen Aufgaben **stets** zu unserer **vollen** Zufriedenheit gelöst.“

Weitere Formulierungsmöglichkeiten sind:

- „Sie hat die ihr übertragenen Aufgaben zu unserer vollsten Zufriedenheit gelöst.“
- „Wir waren während der gesamten Beschäftigungszeit mit seinen Leistungen voll und ganz zufrieden.“
- „Sie hat unseren Erwartungen in jeder Hinsicht und bester Weise entsprochen“
- „Ihre Leistungen waren gut.“

(Fortsetzung)

- c) **Durchschnittlich:** „Er (sie) hat die ihm (ihr) übertragenen Aufgaben zu unserer **vollen** Zufriedenheit erledigt.“

Das gleiche gilt für die Formulierungen::

- „Ihre Leistungen waren stets zufriedenstellend.“
- „Er hat unseren Erwartungen in jeder Hinsicht entsprochen.“
- „Mit ihren Leistungen waren wir stets zufrieden.“

- d) **Mäßig:** „Er (sie) hat die ihm (ihr) übertragenen Aufgaben zu unserer Zufriedenheit gelöst.“

Weitere Formulierungsmöglichkeiten sind:

- „Mit ihren Leistungen waren wir zufrieden.“
- „Er hat unseren Erwartungen entsprochen.“
- „Sie hat zufriedenstellend gearbeitet.“

- e) **Mangelhaft:** „Er (sie) hat die ihm (ihr) übertragenen Aufgaben im großen und ganzen zu unserer Zufriedenheit erledigt.“

Das gleiche gilt für die Formulierungen::

- „Er hat unsere Erwartungen größtenteils erfüllt.“
- „Sie führte die ihr übertragenen Aufgaben mit großem Fleiß und Interesse durch.“
- „Er machte sich mit großem Eifer an die übertragenen Aufgaben heran.“

Eine weitere Steigerung im negativen Sinne bedeutet folgende Formulierung.

- „Sie **bemühte** sich, die ihr übertragenen Aufgaben zufriedenstellend zu erledigen.“

Eine ungenügende Leistung wird auch durch folgende Formulierungen widerspiegelt:

- „Er hat sich nach Kräften bemüht, die Leistungen zu erbringen, die wir an diesem Arbeitsplatz normalerweise erwarten.“
- „Er hatte Gelegenheit, seine Aufgaben kennenzulernen und machte Vorschläge zu ihrer Bewältigung.“



# Beurteilungen des Fachwissen

|                  |                                                                                                                                                                                                                                                            |
|------------------|------------------------------------------------------------------------------------------------------------------------------------------------------------------------------------------------------------------------------------------------------------|
| Sehr gut         | <ul style="list-style-type: none"><li>• Sie beherrschte ihr Arbeitsgebiet umfassend (hervorragend, souverän)</li><li>• Er besaß ein hervorragendes, jederzeit verfügbares Fachwissen</li><li>• Sie fand sich in neuen Situationen sicher zurecht</li></ul> |
| Gut              | <ul style="list-style-type: none"><li>• Er verfügte über ein gutes Fachwissen und löste durch seine sichere Anwendung auch schwierige Aufgaben</li><li>• Sie arbeitete sicher und schnell</li><li>• Er fand sich in neuen Situationen zurecht</li></ul>    |
| Durchschnittlich | <ul style="list-style-type: none"><li>• Sie verfügte über das erforderliche Fachwissen und setzte es erfolgreich ein</li><li>• Er passte sich den jeweiligen Situationen an</li><li>• Sie fand brauchbare Lösungen</li></ul>                               |
| Mäßig            | <ul style="list-style-type: none"><li>• Er zeigte das entsprechende Fachwissen</li><li>• Sie beherrschte ihr Arbeitsgebiet entsprechend den Anforderungen</li><li>• Er bewältigte neue Situationen nicht ohne Schwierigkeiten</li></ul>                    |

S. 800 Abb. 101



## Beurteilungen der Arbeitsbereitschaft

|                         |                                                                                                                                                                                                                                                                                                                                                                    |
|-------------------------|--------------------------------------------------------------------------------------------------------------------------------------------------------------------------------------------------------------------------------------------------------------------------------------------------------------------------------------------------------------------|
| <b>Sehr gut</b>         | <ul style="list-style-type: none"><li>• Sie zeigte stets Initiative, großen Fleiß und Eifer</li><li>• Er identifizierte sich stets mit seiner Aufgabe und dem Unternehmen</li><li>• Sie hatte immer ausgezeichnete Ideen und gab wertvolle Anregungen</li><li>• Er ergriff selbstständig alle erforderlichen Maßnahmen und führte sie entschlossen durch</li></ul> |
| <b>Gut</b>              | <ul style="list-style-type: none"><li>• Er zeigte stets Initiative, Fleiß und Eifer</li><li>• Sie führte alle Aufgaben mit großer Umsicht, großem Wissen und hohem Engagement aus</li><li>• Sie hatte oft gute Ideen und gab weiterführende Anregungen</li><li>• Er ging alle Aufgaben tatkräftig an und handelte selbstständig</li></ul>                          |
| <b>Durchschnittlich</b> | <ul style="list-style-type: none"><li>• Er zeigte Initiative, Fleiß und Eifer</li><li>• Sie führte ihre Aufgaben mit Umsicht, Wissen und Engagement aus</li><li>• Sie gab gelegentlich eigene Anregungen</li><li>• Er übernahm die übertragenen Aufgaben und führte sie weitgehend selbstständig aus</li></ul>                                                     |
| <b>Mäßig</b>            | <ul style="list-style-type: none"><li>• Er zeigte bei entsprechendem Anstoß Fleiß und Eifer</li><li>• Sie führte Ihre Aufgaben im Großen und Ganzen umsichtig und engagiert aus</li><li>• Sie bemühte sich, Anregungen zu geben</li><li>• Er führte die ihm übertragenen Aufgaben unter Anleitung aus</li></ul>                                                    |

S. 800 Abb. 102



# Beurteilungen von Ausdauer und Belastbarkeit

|                  |                                                                                                                                                                                                           |
|------------------|-----------------------------------------------------------------------------------------------------------------------------------------------------------------------------------------------------------|
| Sehr gut         | <ul style="list-style-type: none"><li>• Er war ein stets ausdauernder und hochgradig belastbarer Mitarbeiter</li><li>• Sie bewältigte auch unter schwierigsten Arbeitsbedingungen alle Aufgaben</li></ul> |
| Gut              | <ul style="list-style-type: none"><li>• Er war ein ausdauernder und gut belastbarer Mitarbeiter</li><li>• Sie war wechselnden Beanspruchungen gewachsen und hielt auch unter Termindruck durch</li></ul>  |
| Durchschnittlich | <ul style="list-style-type: none"><li>• Er war ein ausdauernder und belastbarer Mitarbeiter</li><li>• Sie war den üblichen Beanspruchungen gewachsen</li></ul>                                            |
| Mäßig            | <ul style="list-style-type: none"><li>• Er zeigte Belastbarkeit</li><li>• Sie war den üblichen Beanspruchungen größtenteils gewachsen</li></ul>                                                           |

S. 801 Abb. 103



## Bewertung von Wenigkeit und Aufgeschlossenheit

|                         |                                                                                                                                                                                                                    |
|-------------------------|--------------------------------------------------------------------------------------------------------------------------------------------------------------------------------------------------------------------|
| <b>Sehr gut</b>         | <ul style="list-style-type: none"><li>• Sie war sehr umstellungsfähig und außerordentlich flexibel</li><li>• Er besaß eine schnelle Auffassungsgabe und war überaus aufgeschlossen gegenüber allem Neuen</li></ul> |
| <b>Gut</b>              | <ul style="list-style-type: none"><li>• Sie war umstellungsfähig, wendig und vielseitig</li><li>• Er war gegenüber allem Neuen aufgeschlossen</li></ul>                                                            |
| <b>Durchschnittlich</b> | <ul style="list-style-type: none"><li>• Sie konnte sich, wenn nötig, umstellen</li></ul>                                                                                                                           |
| <b>Mäßig</b>            | <ul style="list-style-type: none"><li>• Er bevorzugte eine gleichbleibende Tätigkeit</li></ul>                                                                                                                     |





## Bewertung von Arbeitsweise und Arbeitserfolg

|                         |                                                                                                                                                                                                                                                                          |
|-------------------------|--------------------------------------------------------------------------------------------------------------------------------------------------------------------------------------------------------------------------------------------------------------------------|
| <b>Sehr gut</b>         | <ul style="list-style-type: none"><li>• Er war äußerst einsatzfreudig</li><li>• Sie arbeitete stets mit äußerster Sorgfalt und größter Genauigkeit</li><li>• Er zeichnete sich durch ein hohes Maß an Selbständigkeit aus und erzielte stets optimale Lösungen</li></ul> |
| <b>Gut</b>              | <ul style="list-style-type: none"><li>• Er erledigte seine Aufgaben mit großem Fleiß</li><li>• Sie arbeitete stets mit Sorgfalt und Genauigkeit</li><li>• Er arbeitete sehr selbständig und erzielte stets gute Lösungen</li></ul>                                       |
| <b>Durchschnittlich</b> | <ul style="list-style-type: none"><li>• Er war gründlich, fleißig und gewissenhaft</li><li>• Sie arbeitete sorgfältig und genau</li><li>• Er arbeitete selbständig nach eigener Planung und erzielte gute Lösungen</li></ul>                                             |
| <b>Mäßig</b>            | <ul style="list-style-type: none"><li>• Er zeigte im allgemeinen zufriedenstellende Arbeitsqualität</li><li>• Sie arbeitete im allgemeinen sorgfältig und genau</li></ul>                                                                                                |

S. 801 Abb. 105



# Bewertung von Zuverlässigkeit, Vertrauen und Verantwortung

|                  |                                                                                                                                                                                                    |
|------------------|----------------------------------------------------------------------------------------------------------------------------------------------------------------------------------------------------|
| Sehr gut         | <ul style="list-style-type: none"><li>• Er war immer pflichtbewusst und stets zuverlässig</li><li>• Sie war äußerst vertrauenswürdig und stets bereit, volle Verantwortung zu übernehmen</li></ul> |
| Gut              | <ul style="list-style-type: none"><li>• Er war pflichtbewusst und zuverlässig</li><li>• Sie war vertrauenswürdig und regelmäßig bereit, Verantwortung zu übernehmen</li></ul>                      |
| Durchschnittlich | <ul style="list-style-type: none"><li>• Er war durchaus pflichtbewusst und zuverlässig</li><li>• Sie war insgesamt vertrauenswürdig und übernahm ab und zu Verantwortung</li></ul>                 |
| Mäßig            | <ul style="list-style-type: none"><li>• Er war meistens zuverlässig</li></ul>                                                                                                                      |



**Bewertung der Führung**  
**Verhalten gegenüber Vorgesetzten und Kollegen**

|                         |                                                                                                                                                                                                                                                                                                                                                                                              |
|-------------------------|----------------------------------------------------------------------------------------------------------------------------------------------------------------------------------------------------------------------------------------------------------------------------------------------------------------------------------------------------------------------------------------------|
| <b>Sehr gut</b>         | <ul style="list-style-type: none"><li>• Sein Verhalten gegenüber Vorgesetzten und Mitarbeitern war jederzeit einwandfrei</li><li>• Ihr Verhalten gegenüber Vorgesetzten und Kollegen war immer vorbildlich</li><li>• Er wurde wegen seines freundlichen Wesens und seiner kollegialen Haltung bei Vorgesetzten und Mitarbeitern sehr geschätzt</li><li>• Sie war stets hilfsbereit</li></ul> |
| <b>Gut</b>              | <ul style="list-style-type: none"><li>• Sein Verhalten gegenüber Vorgesetzten und Mitarbeitern war einwandfrei</li><li>• Ihr Verhalten zu Vorgesetzten und Kollegen war vorbildlich</li><li>• Wegen seines freundlichen Wesens und seines kollegialen Verhaltens schätzten ihn Vorgesetzte und Mitarbeiter gleichermaßen</li><li>• Sie war hilfsbereit</li></ul>                             |
| <b>Durchschnittlich</b> | <ul style="list-style-type: none"><li>• Ihr Verhalten zu Vorgesetzten und Kollegen gab zu keinen Klagen Anlass</li><li>• Vorgesetzte und Mitarbeiter schätzten sein kollegiales Verhalten</li></ul>                                                                                                                                                                                          |
| <b>Mäßig</b>            | <ul style="list-style-type: none"><li>• Ihr persönliches Verhalten war insgesamt einwandfrei</li><li>• Die Zusammenarbeit mit Vorgesetzten und Mitarbeitern verlief meist reibungslos</li></ul>                                                                                                                                                                                              |

S. 802 Abb. 107



Bewertung des Führungsverhaltens

|                  |                                                                                                                                                                                                                                                  |
|------------------|--------------------------------------------------------------------------------------------------------------------------------------------------------------------------------------------------------------------------------------------------|
| Sehr gut         | <ul style="list-style-type: none"><li>• Er war aufgrund seiner Führungsleistungen als Vorgesetzter voll anerkannt und allseits beliebt</li><li>• Sie verstand es in hervorragender Weise, ihre Mitarbeiter zu motivieren und zu leiten</li></ul> |
| Gut              | <ul style="list-style-type: none"><li>• Er war aufgrund seiner Führungsleistungen als Vorgesetzter anerkannt und beliebt</li><li>• Sie verstand es, ihre Mitarbeiter zu motivieren und zu leiten</li></ul>                                       |
| Durchschnittlich | <ul style="list-style-type: none"><li>• Er wurde im großen und ganzen als Vorgesetzter geschätzt und anerkannt</li><li>• Sie konnte als Vorgesetzte ihre Mitarbeiter zufriedenstellend motivieren</li></ul>                                      |
| Mäßig            | <ul style="list-style-type: none"><li>• Er war ein nicht unbeliebter Vorgesetzter</li><li>• Sie bemühte sich, die Arbeit ihrer Mitarbeiter zu koordinieren</li></ul>                                                                             |

S. 803 Abb. 108



Bewertung der Sozialverhaltens

|                  |                                                                                                                                                                                                                                                                                                                                                                                                                                                                             |
|------------------|-----------------------------------------------------------------------------------------------------------------------------------------------------------------------------------------------------------------------------------------------------------------------------------------------------------------------------------------------------------------------------------------------------------------------------------------------------------------------------|
| Sehr gut         | <ul style="list-style-type: none"><li>• Er wurde wegen seines freundlichen Wesens und seiner kollegialen Haltung bei Vorgesetzten und Mitarbeitern sehr geschätzt</li><li>• Sein persönliches Verhalten gegenüber Vorgesetzten und Mitarbeitern war jederzeit einwandfrei</li></ul>                                                                                                                                                                                         |
| Gut              | <ul style="list-style-type: none"><li>• Ihr Verhalten zu Vorgesetzten und Mitarbeitern war einwandfrei (vorbildlich)</li><li>• Wegen seines freundlichen Wesens und seines kollegialen Verhaltens schätzten ihn Vorgesetzte und Mitarbeiter gleichermaßen</li></ul>                                                                                                                                                                                                         |
| Durchschnittlich | <ul style="list-style-type: none"><li>• Ihr Verhalten gegenüber Mitarbeitern und Vorgesetzten war einwandfrei</li><li>• Seine Zusammenarbeit mit Vorgesetzten und Mitarbeitern war gut</li><li>• Vorgesetzte und Mitarbeiter schätzten ihr kollegiales Verhalten</li></ul>                                                                                                                                                                                                  |
| Mäßig            | <ul style="list-style-type: none"><li>• Ihr persönliches Verhalten war insgesamt einwandfrei</li><li>• Die Zusammenarbeit mit Vorgesetzten und Mitarbeitern verlief meist reibungslos</li><li>• Sie war stets um ein gutes Verhältnis zu Kollegen und Vorgesetzten bemüht</li><li>• Seine Zusammenarbeit mit Vorgesetzten und Mitarbeitern war insgesamt zufriedenstellend</li><li>• Sein Verhalten gegenüber den Vorgesetzten war insgesamt nicht zu beanstanden</li></ul> |

S. 804 Abb. 110



## Bewertung der Führungsleistung bei Führungskräften

|                         |                                                                                                                                                                                                                                                                                                 |
|-------------------------|-------------------------------------------------------------------------------------------------------------------------------------------------------------------------------------------------------------------------------------------------------------------------------------------------|
| <b>Sehr gut</b>         | <ul style="list-style-type: none"><li>• Er verstand es in allerbesten Weise, seine Mitarbeiter zu überzeugen und zu motivieren, so dass er alle ihm übertragenen Aufgaben mit großem Erfolg verwirklichen konnte.</li></ul>                                                                     |
| <b>Gut</b>              | <ul style="list-style-type: none"><li>• Sie überzeugte ihre Mitarbeiter und förderte die Zusammenarbeit. Sie informierte ihr Team, regte Weiterbildung an und delegierte Aufgaben und Verantwortung und erreichte so ein hohes Abteilungsergebnis.</li></ul>                                    |
| <b>Durchschnittlich</b> | <ul style="list-style-type: none"><li>• Er führte seine Mitarbeiter zielbewusst zu überdurchschnittlichen Leistungen</li></ul>                                                                                                                                                                  |
| <b>Mäßig</b>            | <ul style="list-style-type: none"><li>• Sie motivierte ihre Mitarbeiter und erreichte so befriedigende Leistungen</li><li>• Er war seinen Mitarbeitern jederzeit ein verständnisvoller Vorgesetzter</li><li>• Er koordinierte die Arbeit seiner Mitarbeiter und gab klare Anweisungen</li></ul> |

S. 803 Abb. 109

## 6. Datenschutz von Personaldaten

- 6.1 Durchführung von  
Datensicherungsmaßnahmen
- 6.2 Zugriffsschutz
- 6.3 Rechtliche Maßnahmen

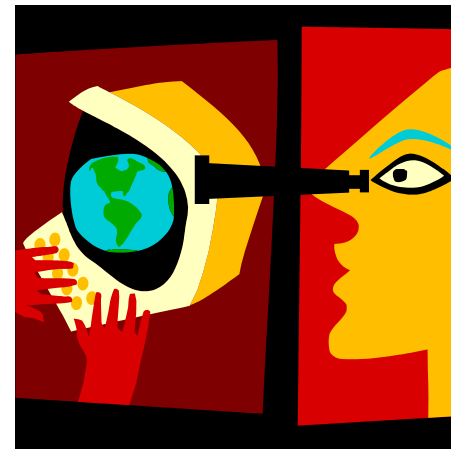

## Abteilungen, die auf Personaldaten zugreifen können:

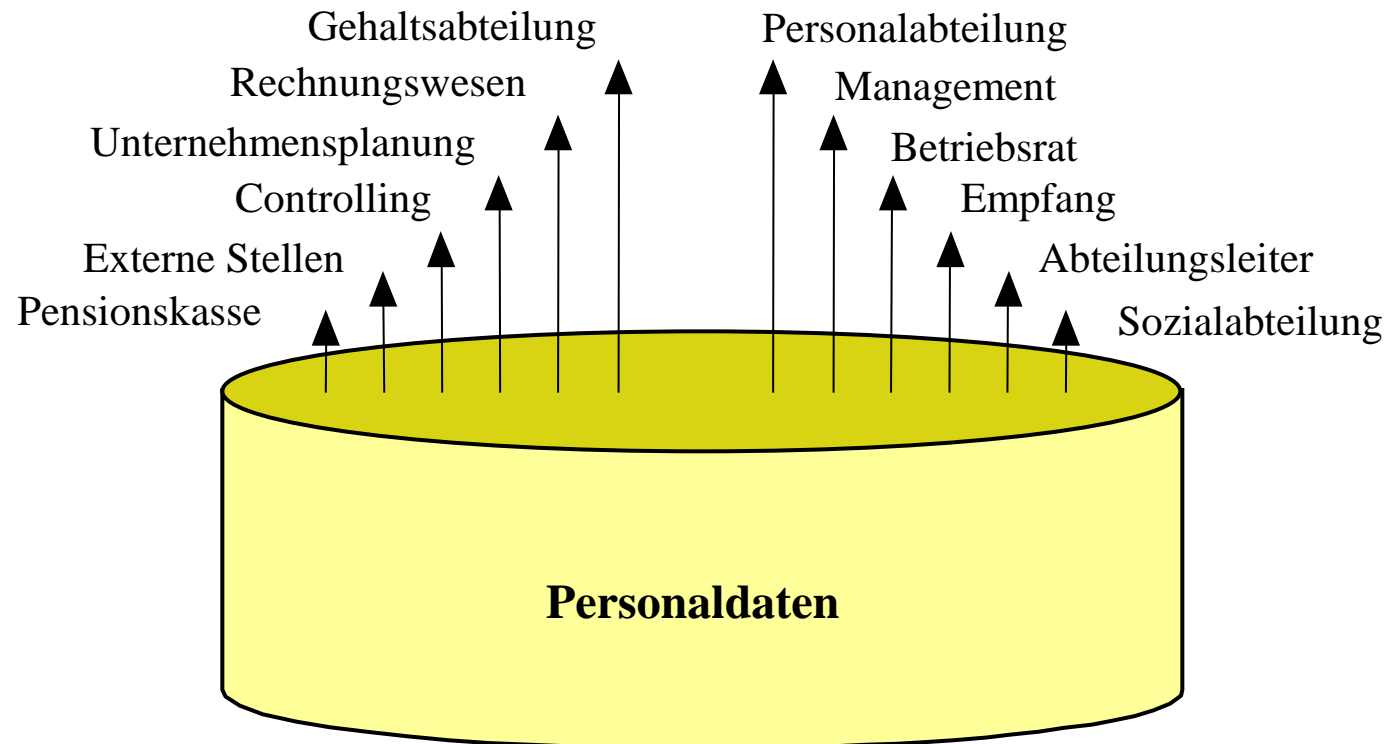

S. 815 Abb. 111

Jung, Hans: Personalwirtschaft, 9. Aufl., München 2010.

© Oldenbourg Wissenschaftsverlag



## Allgemeine Zugriffsregelungen

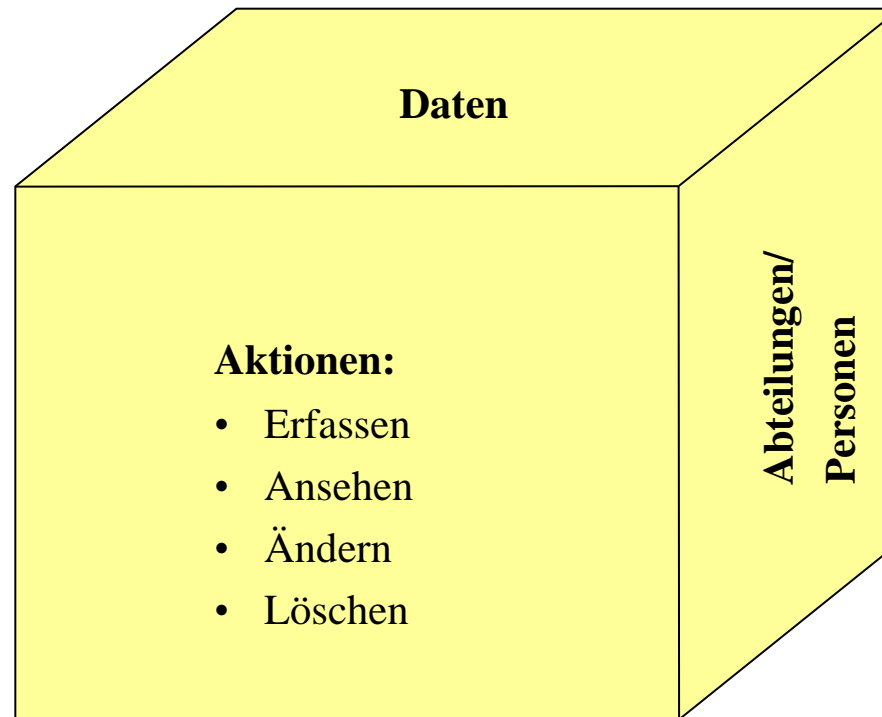

S. 816 Abb. 112

Jung, Hans: Personalwirtschaft, 9. Aufl., München 2010.

© Oldenbourg Wissenschaftsverlag



# Zugriffsrechte eines Mitarbeiters am Empfang

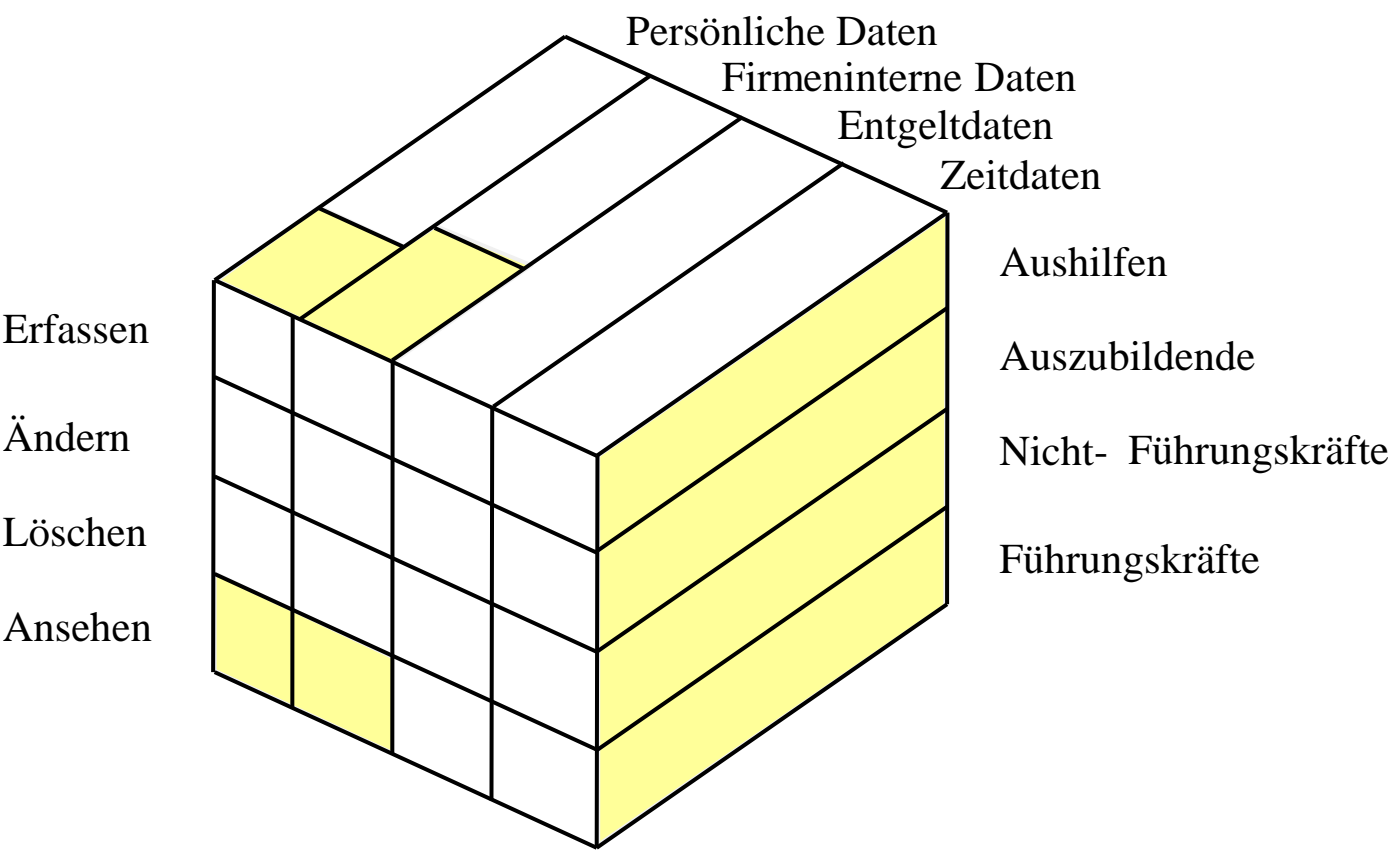

S. 817 Abb. 113



Zugriffsrechte der Ausbildungsleitung

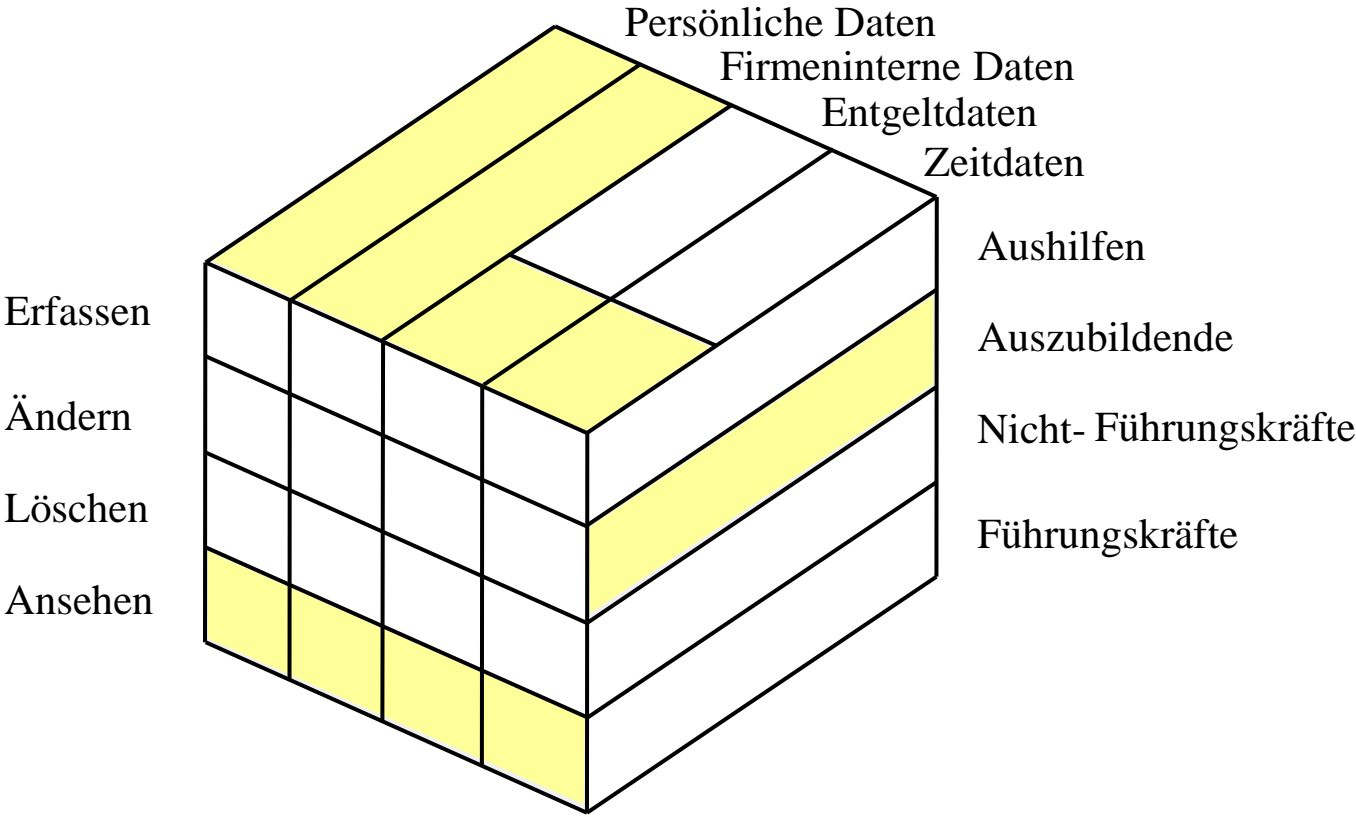

S. 817 Abb. 114



# Zugriffsrechte der Personalabteilung

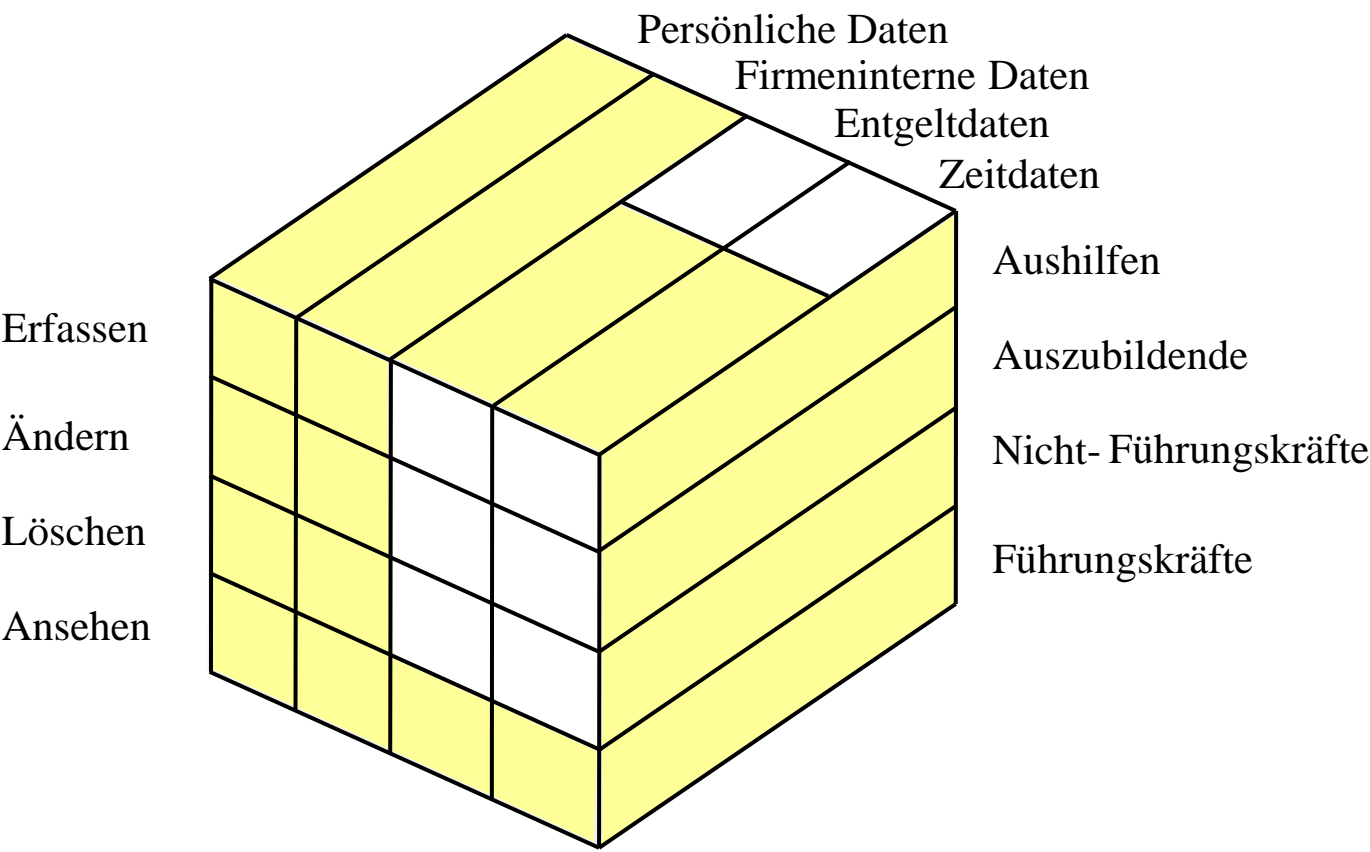

S. 818 Abb. 115



Personenbezogene Daten

| Datentyp                          | Beispiele                                                                  |
|-----------------------------------|----------------------------------------------------------------------------|
| Persönliche Grunddaten            | Name, Anschrift, Geburtsdatum, Nationalität                                |
| Familiendaten                     | Familienstand, Anzahl der Kinder, Angaben über Angehörige                  |
| Daten über Einkommen und Vermögen | Einkommenshöhe, Schulden, Unterhaltspflichten, Kapitalvermögen, Immobilien |
| Steuerliche Daten                 | Steuerklasse, Steuerermäßigung, Heimatfinanzamt                            |
| Daten der Ausbildung              | Schulausbildung, Prüfungen, zusätzliche Qualifikationen                    |
| Berufliche Daten                  | Berufsausbildung, Berufsbezeichnung, Titel                                 |
| Gesundheitsdaten                  | Krankheiten, Grad der Erwerbsunfähigkeit, Kuren                            |
| Soziale Daten                     | Ehrenämter, Funktionen in Verbänden und Vereinen                           |
| Daten über Rechtsverstöße         | Straftaten, Ordnungswidrigkeiten, Disziplinarmaßnahmen, Führerscheinentzug |

S. 819 Abb. 116



Externe Datenempfänger

| Informationsempfänger        | Anwendung                          |
|------------------------------|------------------------------------|
| Finanzamt                    | Lohnsteuer-Anmeldung               |
| Arbeitgeberverband           | Löhne und Gehälter                 |
| Berufsgenossenschaft         | Unfallanzeige, Lohnnachweis        |
| Industrie- und Handelskammer | Ausbildungswesen                   |
| Gewerbeaufsichtsamt          | Ausnahmeregelungen zur Arbeitszeit |
| Statistisches Landesamt      | Arbeitskosten, Löhne und Gehälter  |
| Gewerkschaft                 | Haustarifvertrag                   |
| Kommune                      | Anzahl der Arbeitsplätze           |
| Wissenschaftliche Institute  | Umfragen, empirische Erhebungen    |

S. 820 Abb. 117  
(in Anlehnung an: Hentze, J.: Personalwirtschaftslehre 2, 5. Auflage., Bern/Stuttgart 1991, S. 333)

## Gliederung des Datenschutzes

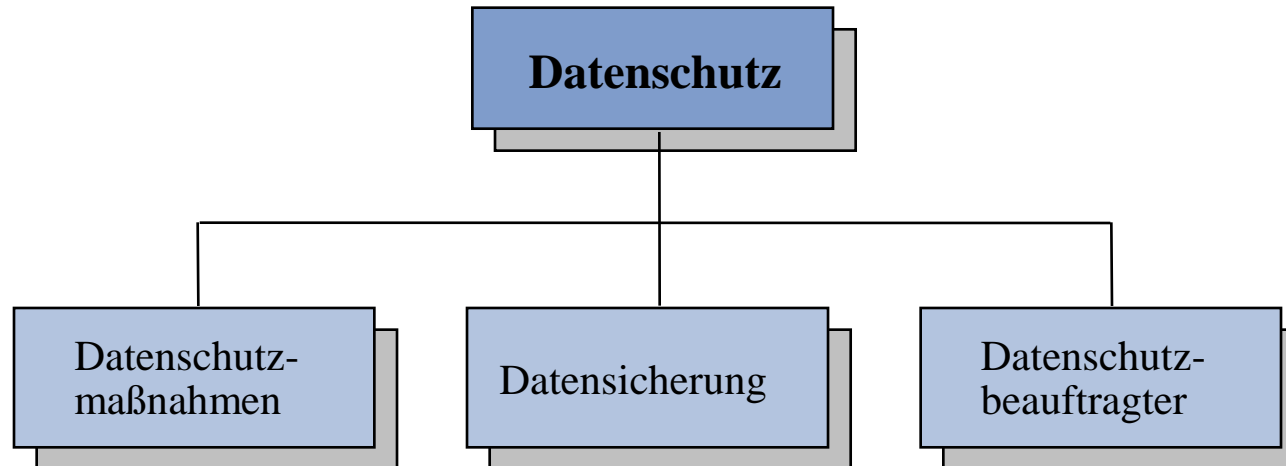

S. 820 Abb. 118

Jung, Hans: Personalwirtschaft, 9. Aufl., München 2010.

© Oldenbourg Wissenschaftsverlag



# Verantwortung und Kompetenz des Datenschutzbeauftragten

| Auftrag gemäß § 4 Abs. 1 BDSG:<br>"Der Beauftragte für den Datenschutz wirkt auf die Einhaltung dieses Gesetzes und<br>anderer Vorschriften für den Datenschutz hin..." |                                                                                                           |
|-------------------------------------------------------------------------------------------------------------------------------------------------------------------------|-----------------------------------------------------------------------------------------------------------|
| Verantwortung                                                                                                                                                           | Kompetenz                                                                                                 |
| Überwachung der ordnungsgemäßen Anwendung der entsprechenden Datenverarbeitungsprogramme (Organisations- und Systemkontrolle)                                           | Informationsrecht bezüglich der Vorhaben der automatisierten Personaldatenverarbeitung                    |
| Schulung der bei der Verarbeitung personenbezogener Daten tätigen Personen                                                                                              | Handlungsfreiheit bei der Weitervermittlung von fachlichem Wissen                                         |
| Dokumentation und Führen des Dateiregisters                                                                                                                             | Weisungsfreiheit bei der Anwendung der Fachkunde ohne Benachteiligung                                     |
| Vertretung des Unternehmens gegenüber Behörden, Betroffenen etc.                                                                                                        | Unterstützung (persönlich, sachlich, finanziell) durch die Geschäftsführung oder den Leiter einer Behörde |
| Verwaltungsaufgaben: Arbeitsanweisung, Protokolle, Meldewesen etc.                                                                                                      | Unterstellung unmittelbar unter die Geschäfts- oder Behördenleitung                                       |
| Prüfung der Verarbeitung vor Beginn (Vorabprüfung)                                                                                                                      | Informationsrecht bezüglich der Angaben zu meldepflichtigen Verarbeitungen                                |

S. 823 Abb. 119
