# Supplementary material
Source: publisher site journal article supplement (https://www.degruyterbrill.com/publication/isbn/9783486719048/downloadAsset/9783486719048_Folien--de.zip)
Supplement: Supplementary file 2 [file 9783486719048_Folien--de.zip]

# **Teil B**

## **Personelle Leistungsbereitstellung**

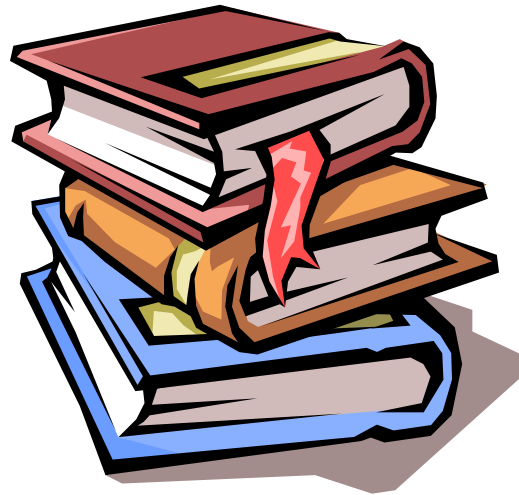

16.12.2010

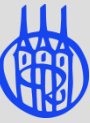

## **Inhaltsverzeichnis**

- 1 Personalbedarfsplanung**
- 2 Personalbeschaffung**
- 3 Personaleinsatzplanung**
- 4 Personalentwicklung**
- 5 Personalfreisetzung**

# 1. Personalbedarfsplanung

- 1.1 Planung des Personalwirtschafts
- 1.2 Schritte der Personalbedarfsplanung
- 1.3 Methoden zur Planung des Personalbedarfs
- 1.4 Rechtliche Aspekte der Personalbedarfsplanung

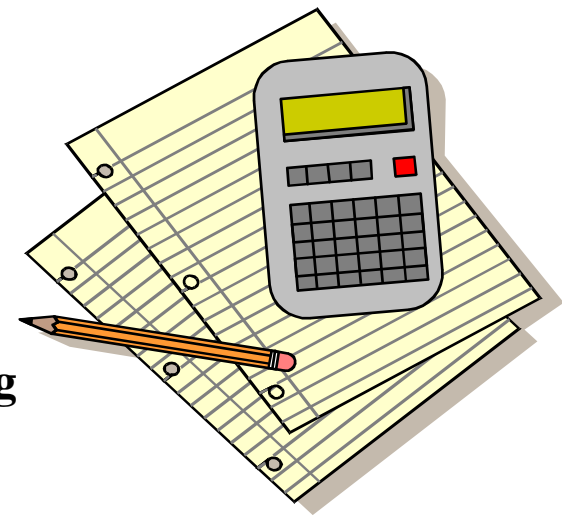

## Einflussfaktoren auf den Personalbedarf

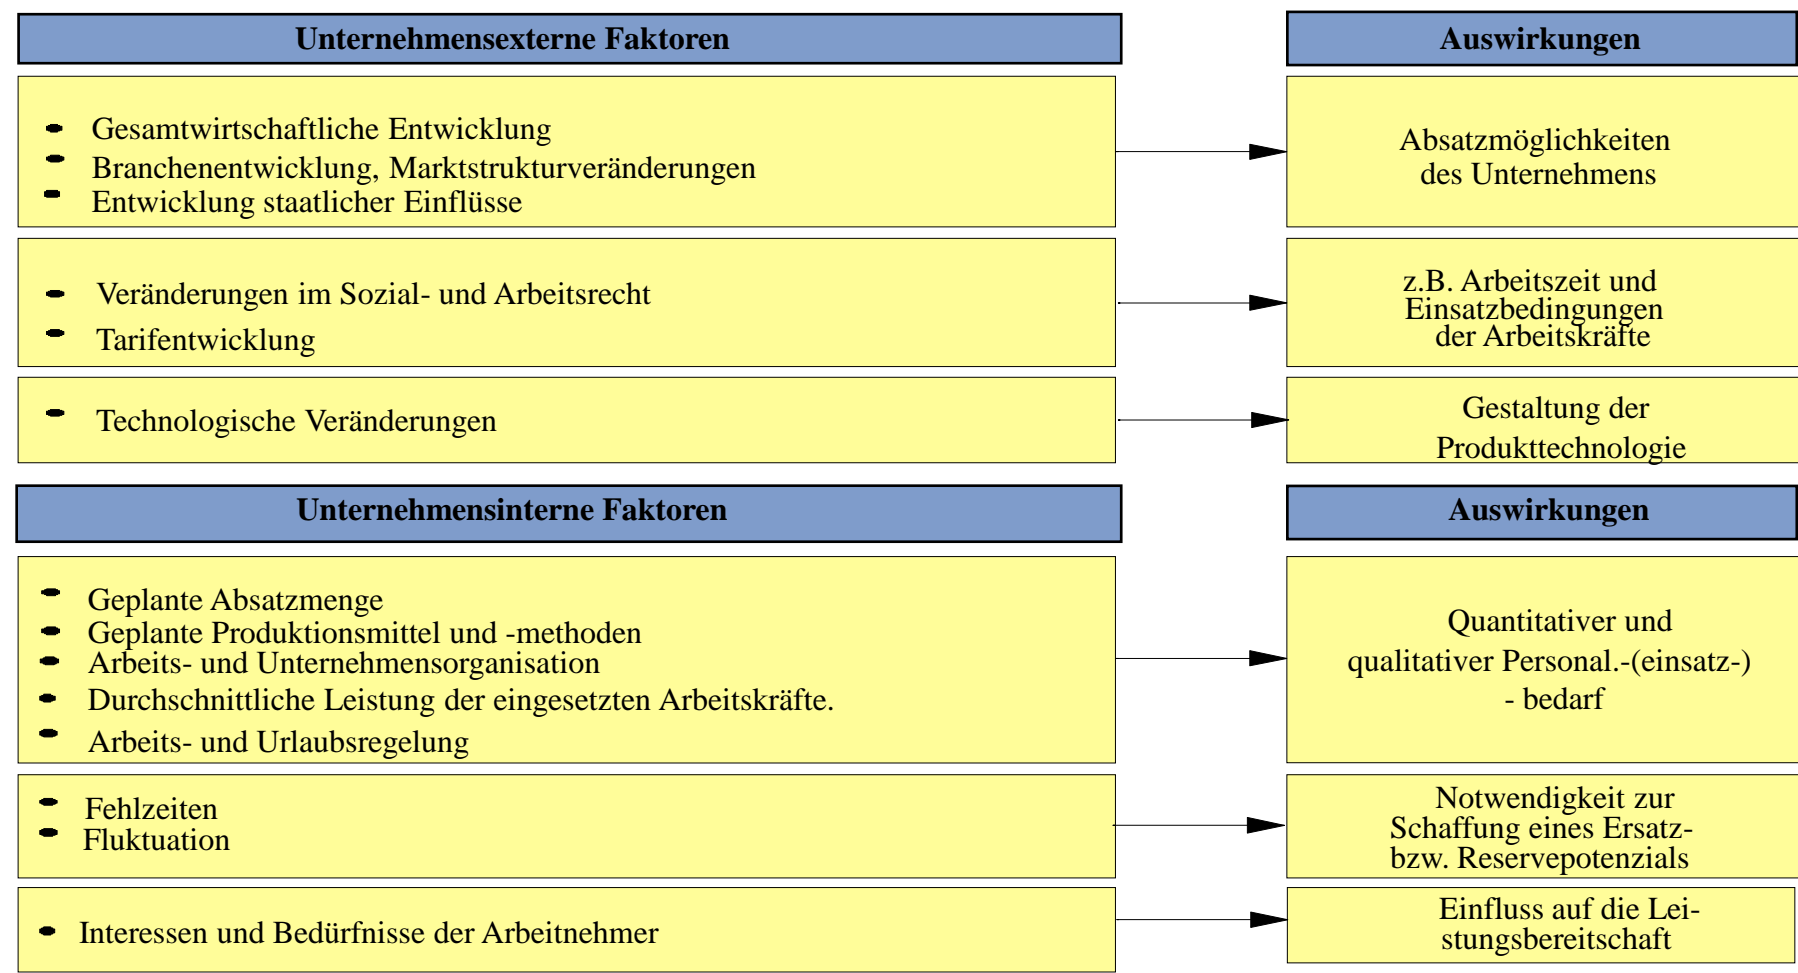

S. 115 Abb. 1

# Einflußfaktoren auf den Personalbestand

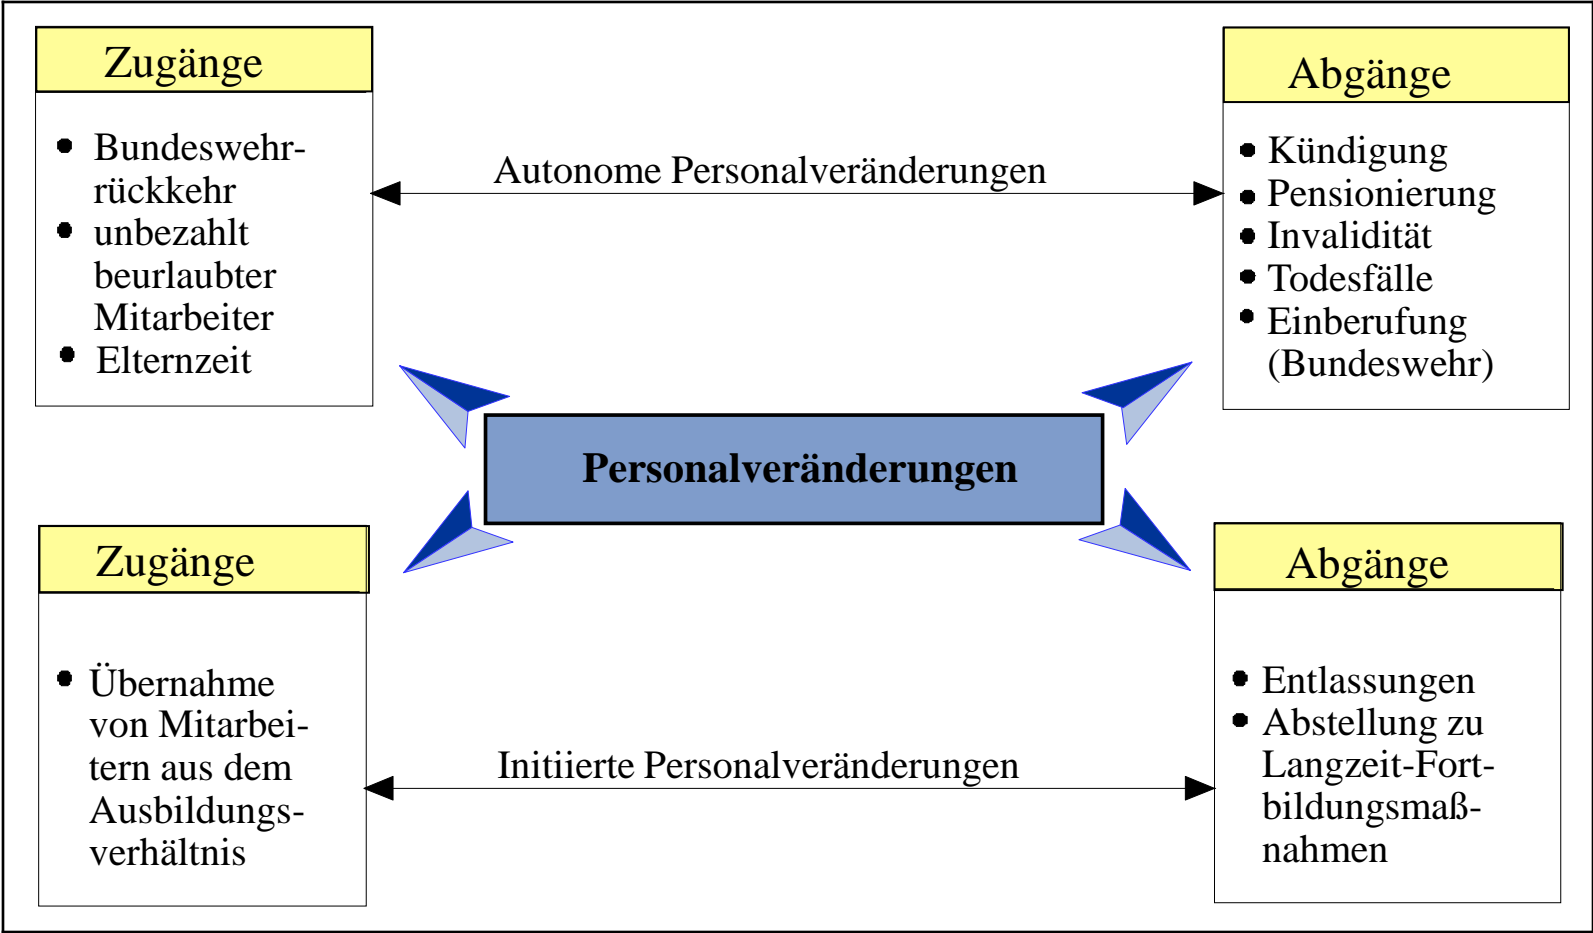

S. 116 Abb. 2

# Ermittlung des zukünftigen Personalbedarfs

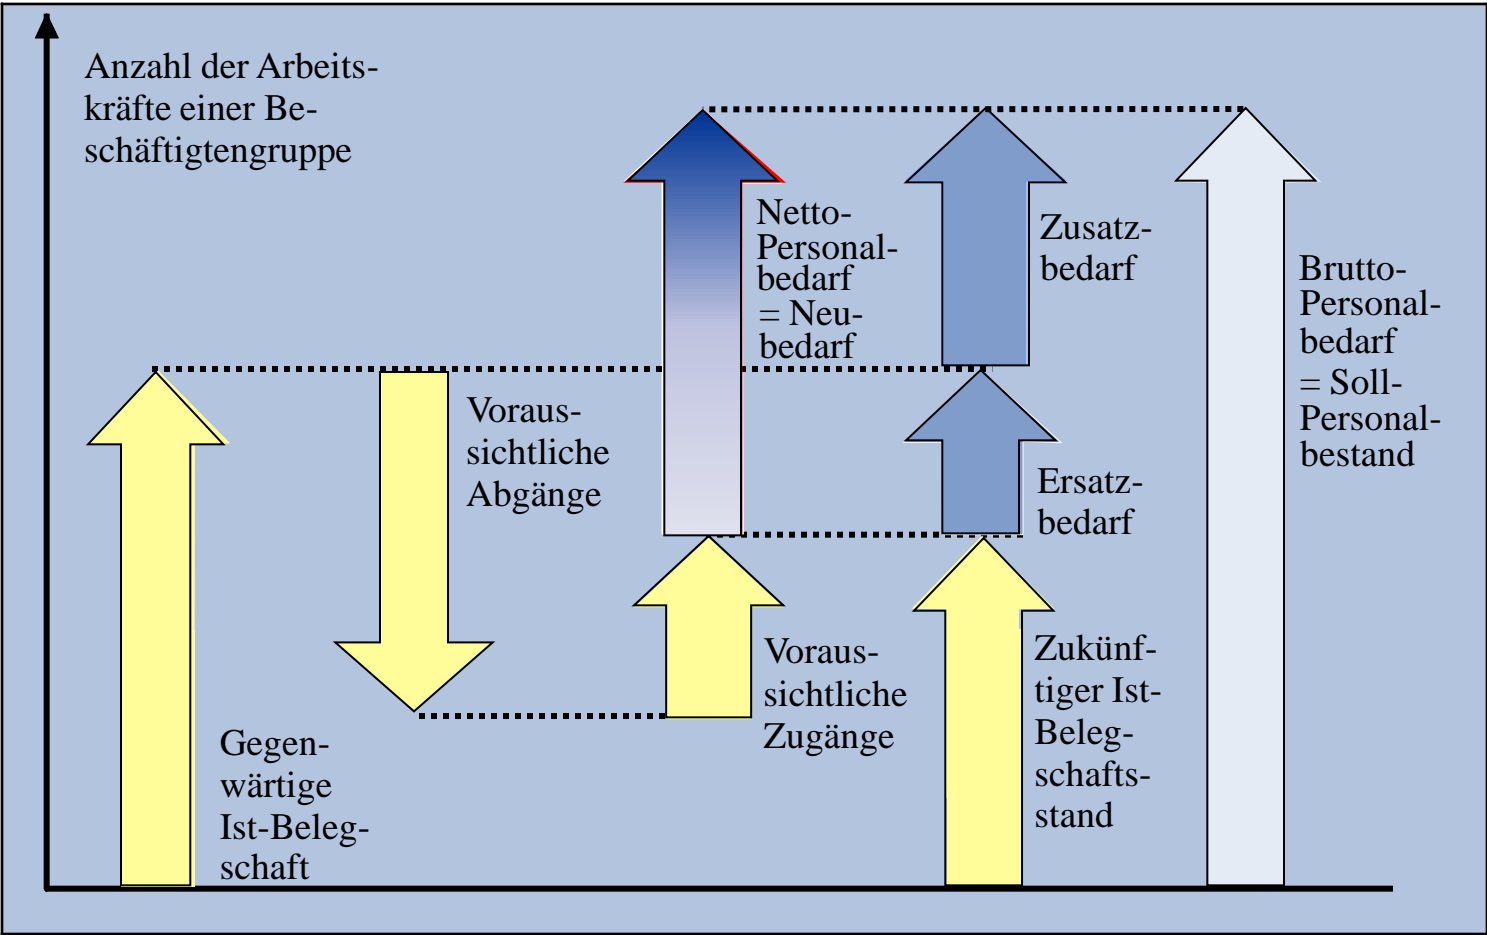

S. 119 Abb. 3

## Ablauf der Personalbedarfsplanung

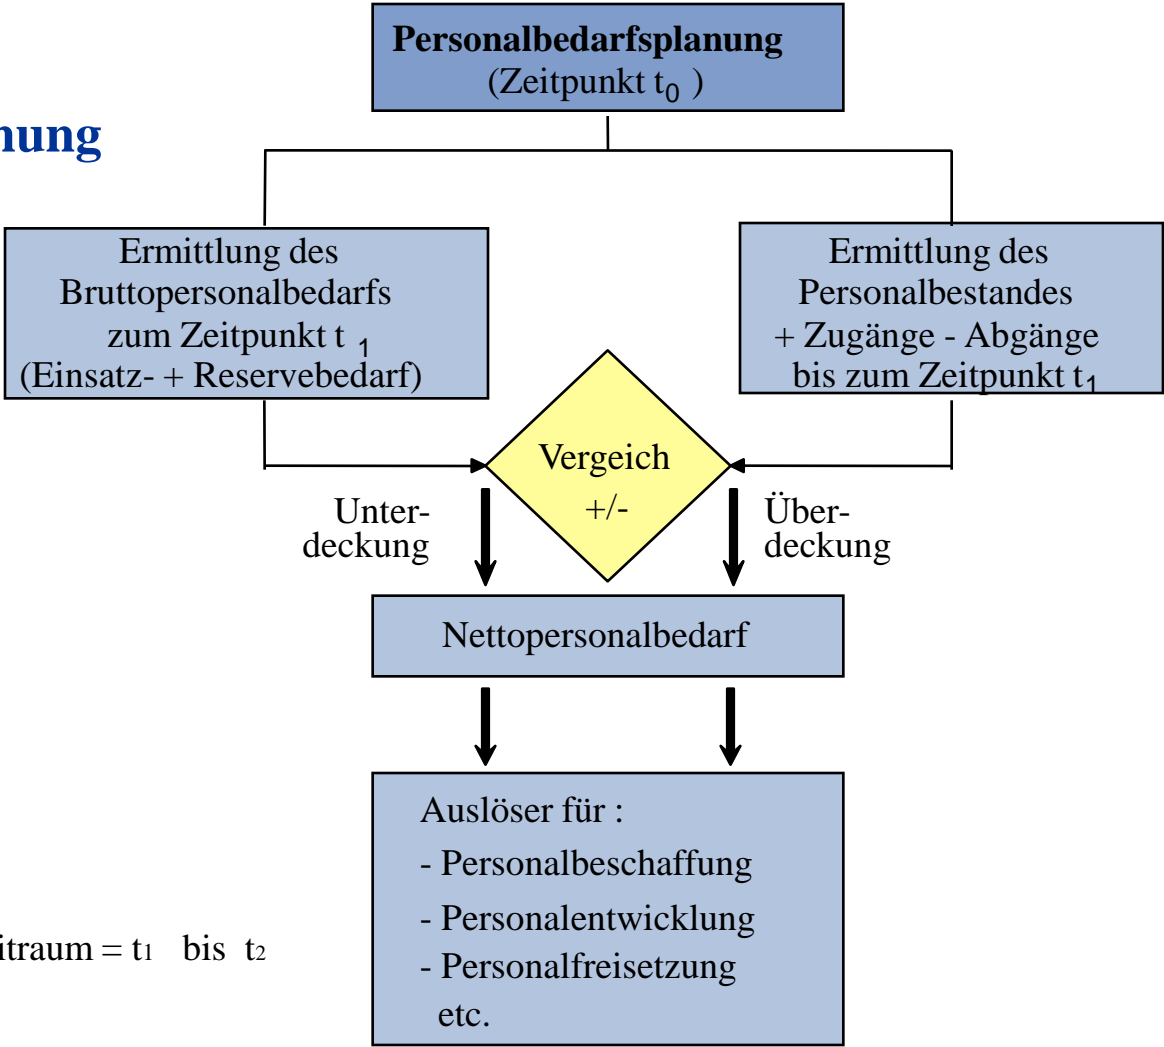

S.119 Abb. 4  
(in Anlehnung an: J./Becker, F. G.: Personal-Management: Grundzüge für Konzeptionen betrieblicher Personalarbeit, 7. Aufl., Stuttgart 2003, S. 194)

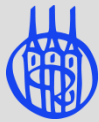

Abgangs-Zugangs-Tabelle

| Personalbestands-<br>rechnung                      | Abteilung X        |   |                    |   |                    |   |
|----------------------------------------------------|--------------------|---|--------------------|---|--------------------|---|
|                                                    | Gruppe A           |   |                    |   |                    |   |
|                                                    | Zeitraum<br>Jahr 1 |   | Zeitraum<br>Jahr 2 |   | Zeitraum<br>Jahr 3 |   |
|                                                    | ges.               | % | ges.               | % | ges.               | % |
| 1    Bestand am Anfang der Periode                 |                    |   |                    |   |                    |   |
| - Abgänge                                          |                    |   |                    |   |                    |   |
| 2    Pensionierung                                 |                    |   |                    |   |                    |   |
| 3    Einberufung Bundeswehr/ Zivildienst           |                    |   |                    |   |                    |   |
| 4    Beförderung innerhalb der Abteilung           |                    |   |                    |   |                    |   |
| 5    Versetzung in andere Abteilung                |                    |   |                    |   |                    |   |
| 6    Ausbildung                                    |                    |   |                    |   |                    |   |
| 7    Entlassung                                    |                    |   |                    |   |                    |   |
| 8    Tod                                           |                    |   |                    |   |                    |   |
| 9    Kündigung durch Arbeitnehmer                  |                    |   |                    |   |                    |   |
| 10   Sonstige                                      |                    |   |                    |   |                    |   |
| 11   Summe der Abgänge (2 bis 10)                  |                    |   |                    |   |                    |   |
| 12   Bestand nach Abgängen (1 - 11)                |                    |   |                    |   |                    |   |
| + geplante (feststehende) Zugänge                  |                    |   |                    |   |                    |   |
| 13   Rückkehr Ausbildung                           |                    |   |                    |   |                    |   |
| 14   Beförderung innerhalb der Abteilung           |                    |   |                    |   |                    |   |
| 15   Versetzung in der Abteilung                   |                    |   |                    |   |                    |   |
| 16   Rückkehr Bundeswehr/ Zivildienst              |                    |   |                    |   |                    |   |
| 17   Übernahme aus Lehrverhältnis                  |                    |   |                    |   |                    |   |
| 18   Sonstige                                      |                    |   |                    |   |                    |   |
| 19   Summe der Zugänge (13 bis 18)                 |                    |   |                    |   |                    |   |
| 20   Personalbestand am Ende der Periode (12 + 19) |                    |   |                    |   |                    |   |

S. 131 Abb. 8

Jung, Hans: Personalwirtschaft, 9. Aufl., München 2010

© Oldenbourg Wissenschaftsverlag



## Methoden zur Personalbedarfsplanung

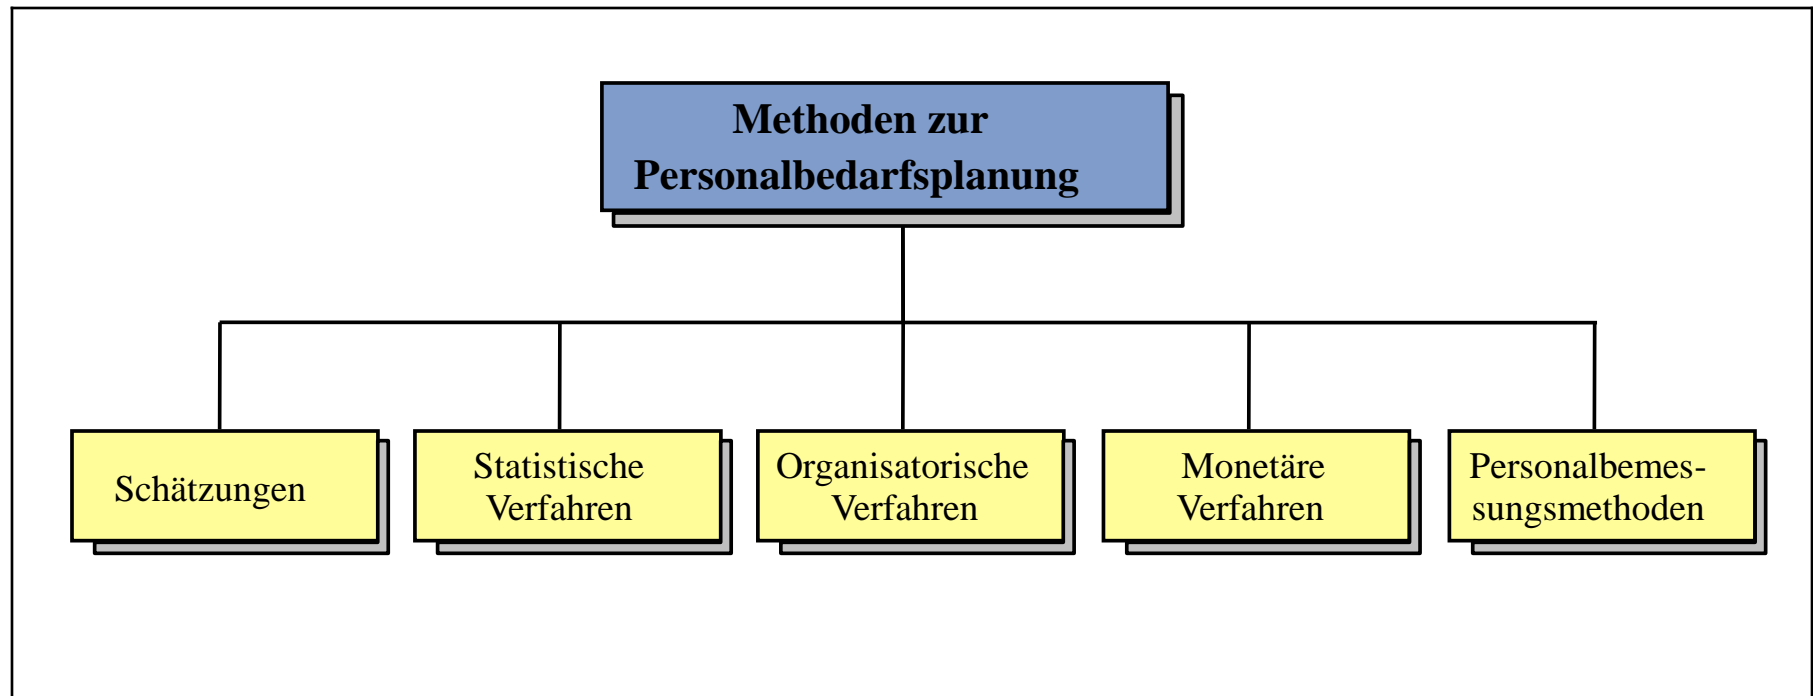

S. 123 Abb. 5

Jung, Hans: Personalwirtschaft, 9. Aufl., München 2010

© Oldenbourg Wissenschaftsverlag

## Vorgehensweise bei der Stufenregression

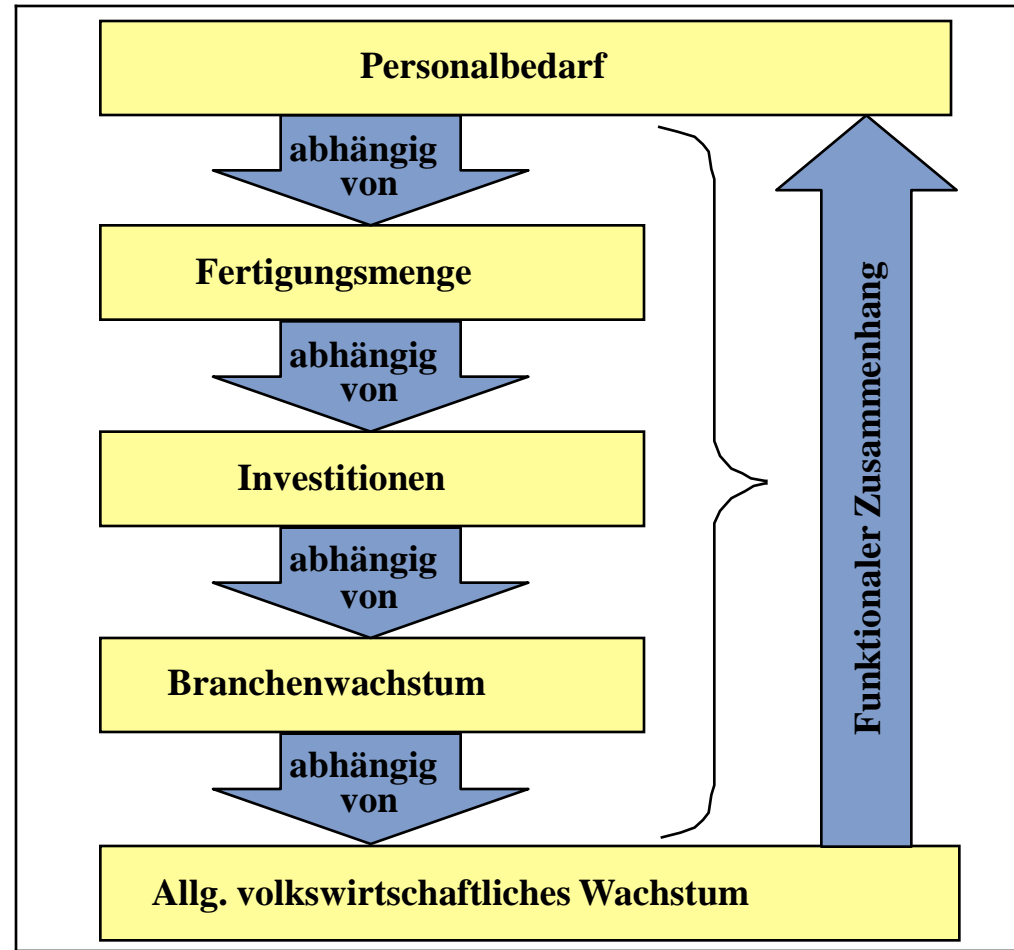

S. 125 Abb. 6

Jung, Hans: Personalwirtschaft, 9. Aufl., München 2010

© Oldenbourg Wissenschaftsverlag

## Verfahrensablauf der globalen Bedarfsprognose mittels statistischer Methoden

1. Auswertung vorhandener Daten und Statistiken, um festzustellen, ob ein Zusammenhang zwischen einer oder mehreren Einflussgrößen und dem Personalbedarf besteht.
2. Festhalten des Einflusses in Form einer mathematischen oder graphischen Funktion.  
(Verfahren der linearen oder exponentiellen Regression, Methoden der kleinsten Quadrate)
3. Feststellen des bisherigen Entwicklungstrends der Einflussgröße.  
Fortschreibung dieses Trends bis zum Planungszeitpunkt (Extrapolation).
4. In Analogie hierzu Berechnung der Entwicklung des Personalbedarfs zum Planungszeitpunkt mit Hilfe der ermittelten Funktion zwischen Einflussgröße und Personalbedarf.

S. 126 Abb. 7

## Personalbemessungsmethoden

$$\text{Personalbedarf} = \frac{\text{Arbeitsmenge} \cdot \text{Zeitbedarf pro Arbeitsvorgang}}{\text{Übliche Arbeitszeit pro Arbeitskraft}}$$

### Verfahren

- **Work-Factor-Analyse (WF)**
- **Methods-time-Measurment-Analyse (MTM)**
- **Multimomentverfahren**

## Rosenkranzformel

Die vereinfachte Rosenkranzformel lautet:

$$PB = \frac{\sum (m_i \cdot t_i)}{T} \cdot V$$

Der Verteilzeitfaktor V setzt sich aus folgenden Einzelfaktoren zusammen:

Nebenzeitfaktor  $= v_1$

Erholungszeitfaktor  $= v_2$

Ausfallzeitfaktor  $= v_3$

$$V = v_1 \cdot v_2 \cdot v_3$$

### Aufgabe 1:

Bestimmen Sie den Personalbedarf einer Steuerberaterkanzlei quantitativ mit dem Personalbemessungsverfahren!

Berechnen Sie den Bedarf anhand folgender Angaben:

| Tätigkeiten                                      | Häufigkeit | Zeitbedarf   |
|--------------------------------------------------|------------|--------------|
| $m_1$ = Bilanzen bzw. Einnahmenüberschußrechnung | 12         | $t_1 = 15$ h |
| $m_2$ = Abschlüsse für Kapitalgesellschaft       | 9          | $t_2 = 24$ h |
| $m_3$ = Einkommenssteuererklärungen              | 20         | $t_3 = 10$ h |
| $m_4$ = Finanzbuchhaltungen/ Lohnabrechnungen    | 40         | $t_4 = 6$ h  |
| $m_5$ = Mandantengespräche                       | 40         | $t_5 = 1$ h  |
| $m_6$ = sonstige internationale Kanzleiarbeit    | 60         | $t_6 = 3$ h  |

$m$  .... Arbeitsmenge in Form gleichartiger Geschäftsfälle im Planungszeitraum  
(1 Monat = 4 Wochen)

$t$  .... Arbeitszeitbedarf je Vorfall in Stunden

$T$  .... Wöchentliche Arbeitszeit in Stunden (37,5 h)

(siehe auch: Jung, H., Arbeits- und Übungsbuch Personalwirtschaft, 2. Auflage)

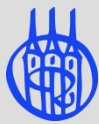

Aufgabe 2:

Berechnen Sie den Personalbedarf für eine Marketingabteilung anhand folgender Daten mit der vereinfachten Rosenkranz-Formel:

| Tätigkeiten                        | Häufigkeit | Zeit         |
|------------------------------------|------------|--------------|
| $m_1$ = Kundenpräsentationen       | 10         | $t_1$ = 15 h |
| $m_2$ = Interessentengespräche     | 40         | $t_2$ = 10 h |
| $m_3$ = Statistikauswertung        | 20         | $t_3$ = 8 h  |
| $m_4$ = Messeauftritte vorbereiten | 8          | $t_4$ = 12 h |
| $m_5$ = Sonstige PR-Aktivitäten    | 25         | $t_5$ = 6 h  |

Der Verteilzeitfaktor setzt sich aus folgenden Einzelfaktoren zusammen:

Nebenzeitfaktor = 1,1 ; Erholungszeitfaktor = 1,2 und Ausfallzeitfaktor = 1,1.

Die wöchentliche Arbeitszeit beträgt 40 Stunden.

(siehe auch: Jung, H., Arbeits- und Übungsbuch Personalwirtschaft, 2. Auflage)

## Aufgabe 3:

a) Bestimmen Sie den Personalbedarf einer Personalabteilung quantitativ mit dem Personalbemessungsverfahren anhand folgender Angaben:

| Tätigkeiten                             | Häufigkeit | Zeitbedarf           |
|-----------------------------------------|------------|----------------------|
| $m_1$ = Einstellungsgespräche führen    | 12         | $t_1 = 2 \text{ h}$  |
| $m_2$ = Personalmeetings                | 9          | $t_2 = 3 \text{ h}$  |
| $m_3$ = Pflege der Personalstatistiken  | 20         | $t_3 = 10 \text{ h}$ |
| $m_4$ = Vorbereitung der Lohnabrechnung | 40         | $t_4 = 6 \text{ h}$  |
| $m_5$ = Mitarbeitergespräche            | 40         | $t_5 = 1 \text{ h}$  |
| $m_6$ = Sonstige Personalarbeit         | 60         | $t_6 = 3 \text{ h}$  |

$m$  .... Arbeitsmenge in Form gleichartiger Geschäftsfälle im Planungszeitraum  
(1 Monat = 4 Wochen)

$t$  .... Arbeitszeitbedarf je Vorfall in Stunden

$T$  .... Wöchentliche Arbeitszeit in Stunden (37,5 h)

b) Nehmen Sie an, dass die Pflege der Personalstatistiken sowie die Vorbereitung der Lohnabrechnung ( $m_3$  und  $m_4$ ) Routinearbeiten sind, bei denen Lernkurveneffekte von 10 % auftreten.

Wie ändert sich dann das Ergebnis?

(siehe auch: Jung, H., Arbeits- und Übungsbuch Personalwirtschaft, 2. Auflage)



## 2. Personalbeschaffung

- 2.1 Aufgaben der Personalbeschaffung
- 2.2 Methoden der Personalbeschaffung
- 2.3 Personalauswahl
- 2.4 Einführung und Einarbeitung neuer Mitarbeiter
- 2.5 Rechtliche Aspekte der Personalbeschaffung

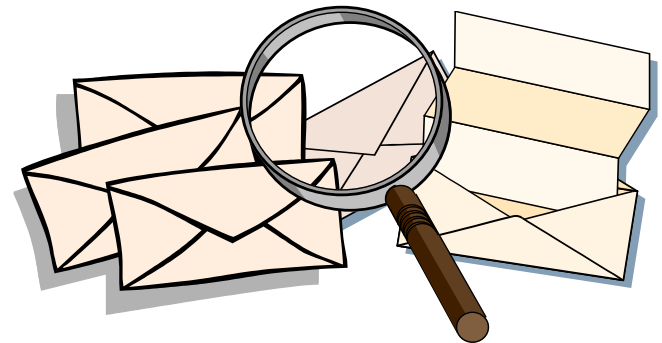

## Personalpolitik im Einflussfeld unterschiedlicher Interessengruppen

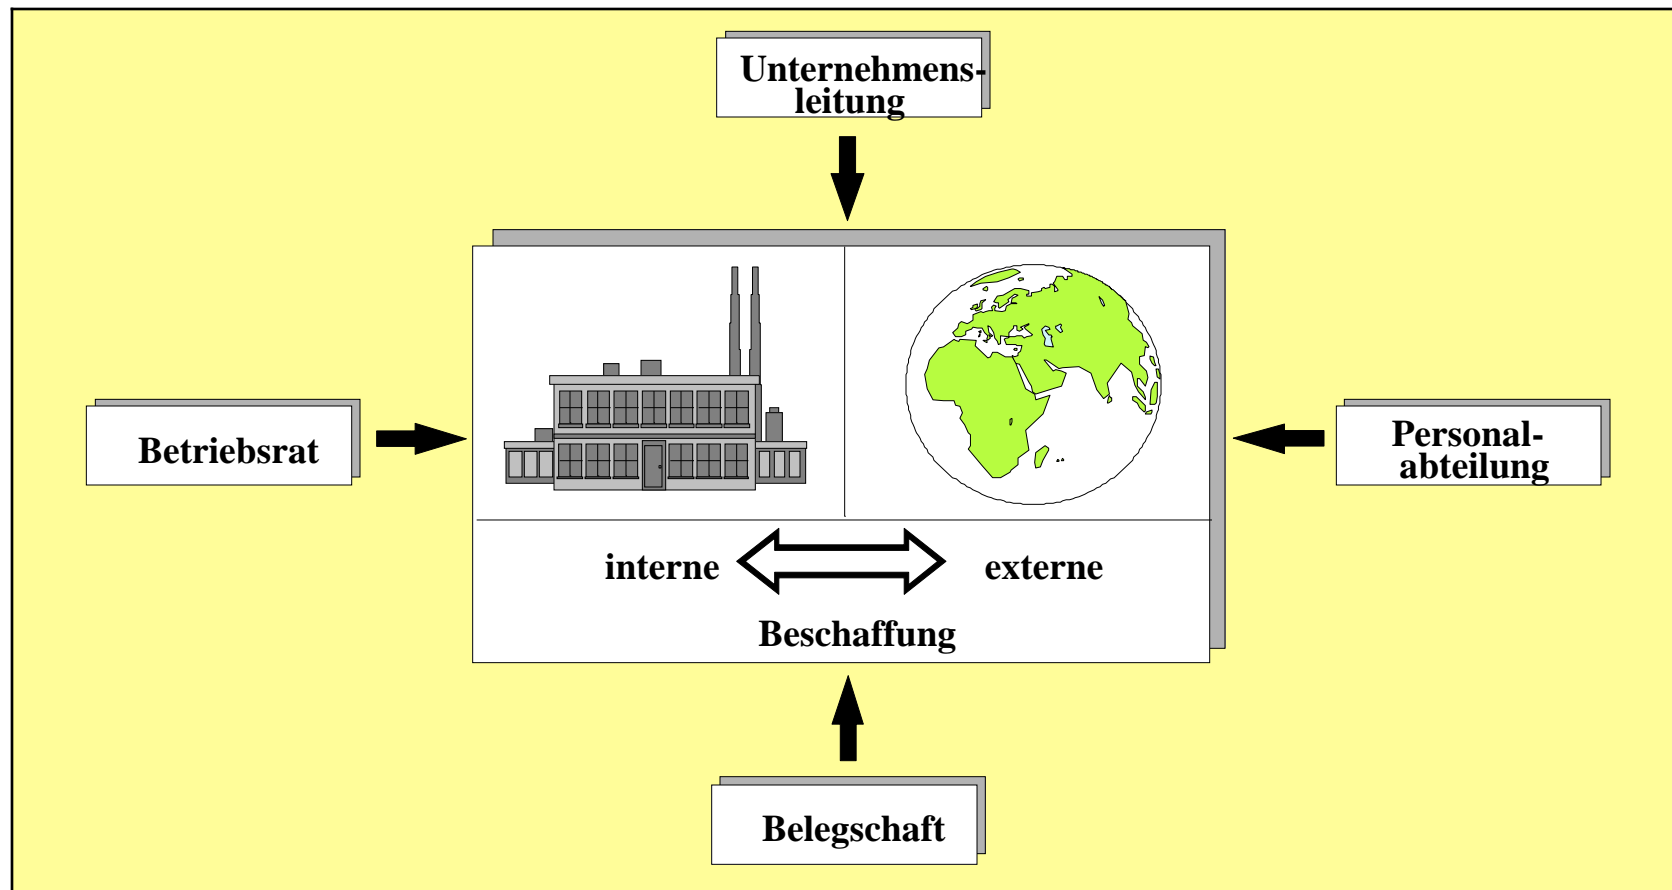

S. 135 Abb. 9

Jung, Hans: Personalwirtschaft, 9. Aufl., München 2010

© Oldenbourg Wissenschaftsverlag

## Übersicht

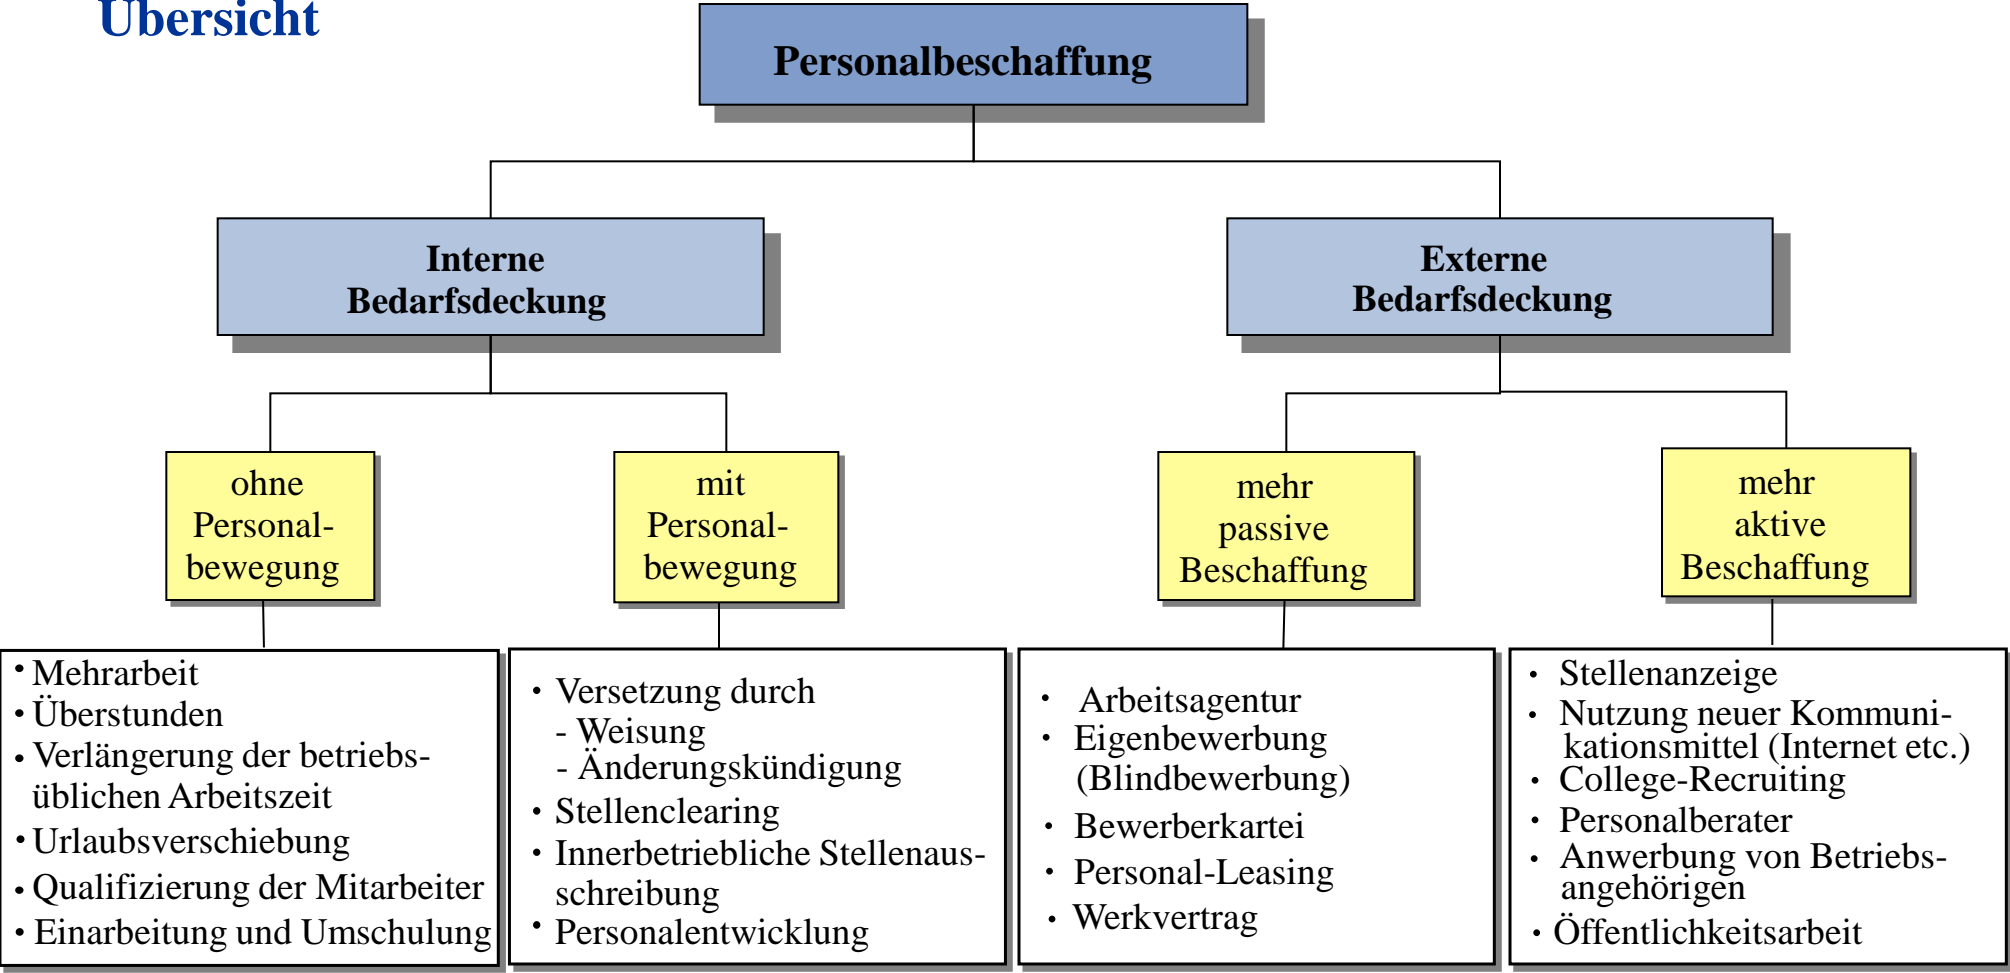

S. 137 Abb. 10,11,14

**Mitbestimmung bei personellen Einzelmaßnahmen**

**§ 99 Abs. 2 BetrVG**

Der Betriebsrat kann die Zustimmung verweigern, wenn

- (1) die personelle Maßnahme gegen ein Gesetz, eine Verordnung, eine Unfallverhütungsvorschrift oder gegen eine Bestimmung in einem Tarifvertrag oder einer Betriebsvereinbarung oder einer gerichtlichen Entscheidung oder eine behördliche Anordnung verstoßen würde,
- (2) die personelle Maßnahme gegen eine Richtlinie nach § 95 verstoßen würde,
- (3) die durch Tatsachen begründete Besorgnis besteht, dass infolge der personellen Maßnahme im Betrieb beschäftigte Arbeitnehmer gekündigt werden oder sonstige Nachteile erleiden, ohne dass dies aus betrieblichen oder persönlichen Gründen gerechtfertigt ist;...
- (4) der betroffene Arbeitnehmer durch die personelle Maßnahme benachteiligt wird, ohne dass dies aus betrieblichen oder in der Person des Arbeitnehmers liegenden Gründen gerechtfertigt ist,
- (5) eine nach § 93 erforderliche Ausschreibung im Betrieb unterblieben ist oder
- (6) die durch Tatsachen begründete Besorgnis besteht, dass der für die personellen Maßnahmen in Aussicht genommenen Bewerber oder Arbeitnehmer den Betriebsfrieden durch gesetzwidriges Verhalten oder durch grobe Verletzung der in § 75 Abs. 1 enthaltenen Grundsätze stören werde.

S. 139 Abb. 12

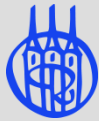

Formular zur innerbetrieblichen Stellenausschreibung (Beispiel)

Innerbetriebliche Stellenausschreibung

Kennziffer: \_\_\_\_\_  
In (Werk, Filiale) \_\_\_\_\_ ist ab \_\_\_\_\_  
eine Stelle als \_\_\_\_\_  
zu besetzen.

Aufgaben:

\_\_\_\_\_

\_\_\_\_\_

\_\_\_\_\_

\_\_\_\_\_

\_\_\_\_\_

\_\_\_\_\_

\_\_\_\_\_

\_\_\_\_\_

\_\_\_\_\_

\_\_\_\_\_

Fachliche und persönliche Voraussetzungen:

\_\_\_\_\_

\_\_\_\_\_

\_\_\_\_\_

\_\_\_\_\_

\_\_\_\_\_

\_\_\_\_\_

\_\_\_\_\_

\_\_\_\_\_

\_\_\_\_\_

\_\_\_\_\_

Einstufung in Lohn-/ Gehaltsgruppe: \_\_\_\_\_  
Arbeitszeit: \_\_\_\_\_

Falls Sie an der Stelle interessiert sind, bewerben Sie sich bitte mit dem in der Personal-  
abteilung erhältlichen Bewerbungsformular unter Angabe der oben genannten Kennziffer  
bis zum: \_\_\_\_\_  
Für Rückfragen steht Ihnen Herr/ Frau \_\_\_\_\_ zur Verfügung.  
auch telefonisch unter \_\_\_\_\_

Personalleitung  
\_\_\_\_\_  
(Datum)

\_\_\_\_\_  
(Unterschrift)

S. 141 Abb. 13

## Personalleasing

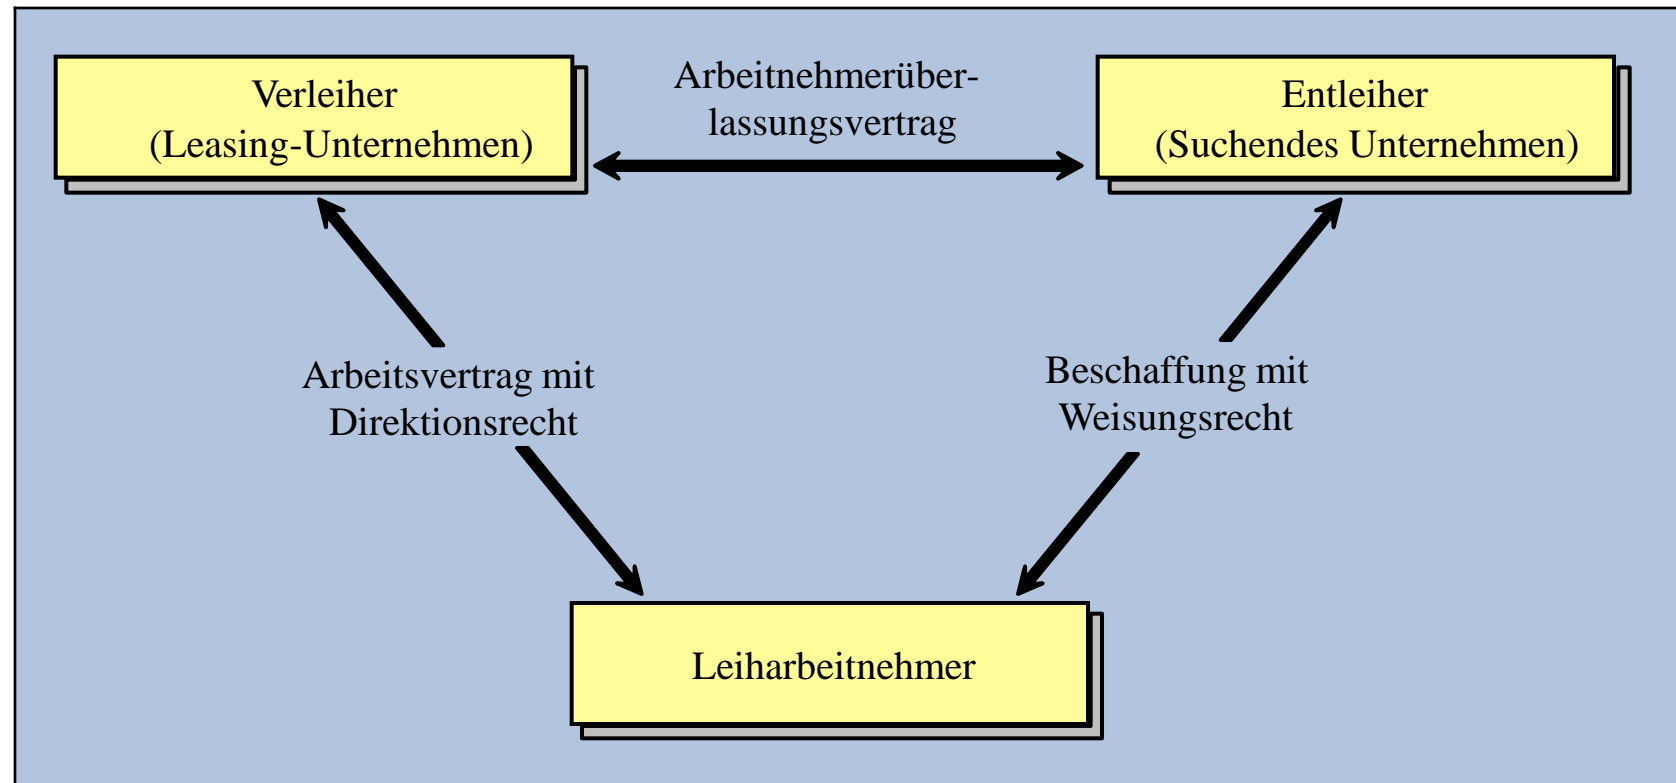

S. 145 Abb. 15

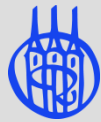

Aufbau einer Stellenanzeige

| Wir sind   | Aussagen über das Unternehmen:                                                                                                                                                                                                           |
|------------|------------------------------------------------------------------------------------------------------------------------------------------------------------------------------------------------------------------------------------------|
|            | <ul style="list-style-type: none"><li>- Firmenname</li><li>- Firmenzeichen</li><li>- Branche</li><li>- Produktionsprogramm</li><li>- Standort des Unternehmens</li><li>- Größe des Unternehmens</li></ul>                                |
| Wir haben  | Aussagen über die freie Stelle:                                                                                                                                                                                                          |
|            | <ul style="list-style-type: none"><li>- Ausschreibungsgrund</li><li>- Aufgabenbeschreibung</li><li>- Stellung innerhalb der Hierarchie</li><li>- Verantwortungsumfang</li><li>- Vertretungsmacht</li><li>- Entwicklungschancen</li></ul> |
| Wir suchen | Aussagen über die Anforderungsmerkmale:                                                                                                                                                                                                  |
|            | <ul style="list-style-type: none"><li>- Berufsbezeichnung</li><li>- Vorbildung</li><li>- Ausbildung</li><li>- Kenntnisse/Kenntnisse</li><li>- Berufserfahrung</li><li>- Persönliche Eigenschaften</li></ul>                              |

| Wir bieten    | Aussagen über die Leistungen:                                                                                                                                                                                                                                                                                     |
|---------------|-------------------------------------------------------------------------------------------------------------------------------------------------------------------------------------------------------------------------------------------------------------------------------------------------------------------|
|               | <ul style="list-style-type: none"><li>- Hinweis auf Lohnhöhe oder Gehaltshöhe</li><li>- Spesen, Urlaub, Fahrtkostenzuschuß etc.</li><li>- evtl. Unterstützung bei der Wohnungssuche</li><li>- Freizeitwert, Schulen etc. des Standortes</li><li>- Sozialleistungen</li><li>- Gleitende Arbeitszeit etc.</li></ul> |
| Wir bitten um | Nennung der Bewerbungsunterlagen:                                                                                                                                                                                                                                                                                 |
|               | <ul style="list-style-type: none"><li>- Bewerbungsschreiben</li><li>- Lebenslauf</li><li>- Zeugnisse</li><li>- Persönliche Vorstellung</li><li>-</li><li>-</li></ul>                                                                                                                                              |

S. 147  
(in Anlehnung an: Lorenz, M./Rohrschneider, U.: Personalauswahl –schnell und sicher Top-Mitarbeiter finden, 2. Aufl., Freiburg/Berlin/München/Zürich 2002)

## Beispiel für die Stellenanzeige einer Bewerberin (Stellengesuch)

Sie suchen eine

### **Staatl. geprüfte Erzieherin**

36 J., Erfahrung als Gruppenleiterin in Kindergarten und Tagesstätten, auch mit behinderten Kindern. In ungekündigter Stellung. Bevorzuge verantwortungsvolle Position im Raum München. Angebot unter Chiffre 4711



## Beispiel einer Stellenanzeige

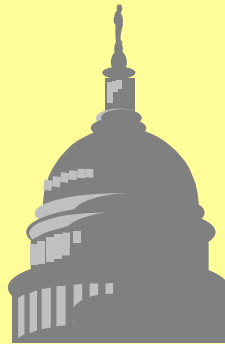

Unser Unternehmen gehört europaweit zu den führenden Spezialisten im Bereich der Altbausanierung und der Erhaltung von Baudenkmälern.

Zur Verstärkung unseres hochqualifizierten Teams suchen wir einen jüngeren

### **Bauingenieur (TH/ FH),**

der sich für die stilgerechte Restauration historischer Baudenkmäler interessiert. Nach einer intensiven Schulung und Einarbeitung wird unser künftiger Mitarbeiter die technische Leitung von Sanierungsprojekten im In- und Ausland übernehmen.

Wir erwarten von den Interessenten neben einem guten Hochschulabschluß ein sicheres Auftreten, Mobilität und Teamfähigkeit. Eine sichere Beherrschung der englischen Sprache ist unabdingbar, Französischkenntnisse sind wünschenswert.

Neben einer leistungsgerechten Dotierung und umfangreichen Sozialleistungen bieten wir Ihnen einen sicheren Arbeitsplatz mit außergewöhnlichen Entwicklungsmöglichkeiten in einer angenehmen Arbeitsatmosphäre.

Ihre Bewerbung mit allen aussagekräftigen Unterlagen richten Sie bitte unter der Kennziffer 08/ 15 an die von uns beauftragte Personalberatungsgesellschaft.

XY-Personalberatung GmbH, Mustergasse 4711, 12345 Musterstadt

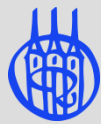

Vor- und Nachteile des E-Recruitment

| Bewerber                                                            |                                                                                                     |
|---------------------------------------------------------------------|-----------------------------------------------------------------------------------------------------|
| Vorteile                                                            | Nachteile                                                                                           |
| Fast kostenloser Zugriff 24 Stunden auf Stellenanzeigen             | Eingeschränktes Angebot bei Berufsgruppen                                                           |
| Zeitersparnis, da eine spezifische Suche möglich ist                | Durch zunehmende Jobbörsen eine zunehmende Informationsflut                                         |
| Einfachheit durch Suchroutine                                       | PC mit Internetzugang erforderlich                                                                  |
| Unternehmen                                                         |                                                                                                     |
| Vorteile                                                            | Nachteile                                                                                           |
| Durch das Internet Erschließung neuer interessanter Bewerbergruppen | Es müssen neben Internetjobangeboten auch noch Stellen in so genannten Printmedien angeboten werden |
| Imagegewinn in der Öffentlichkeit                                   | Unklare Erfolgsaussichten                                                                           |
| Direkte Kontaktaufnahme zu Bewerbern per E-Mail                     | Gefahr aufgrund einer Flut von Bewerbungen                                                          |

S. 149 Abb. 18



Vorteile interner und externer Personalbeschaffung

|          | Interne Personalbeschaffung                                                                                                                                                                                                                                                                                                                                                                                                                                                                                                                                 | Externe Personalbeschaffung                                                                                                                                                                                                                                                                                      |
|----------|-------------------------------------------------------------------------------------------------------------------------------------------------------------------------------------------------------------------------------------------------------------------------------------------------------------------------------------------------------------------------------------------------------------------------------------------------------------------------------------------------------------------------------------------------------------|------------------------------------------------------------------------------------------------------------------------------------------------------------------------------------------------------------------------------------------------------------------------------------------------------------------|
| Vorteile | <ul style="list-style-type: none"><li>- Eröffnung von Aufstiegschancen (erhöht die Bindung an den Betrieb, verbessert Betriebsklima)</li><li>- Geringere Beschaffungskosten</li><li>- Betriebskenntnis</li><li>- Kennen des Mitarbeiters und seines Könnens (geringeres Risiko)</li><li>- Einhaltung des betrieblichen Entgelt-niveaus (bei externer Einstellung ggf. überhöhtes Marktgehalt)</li><li>- Schnellere Stellenbesetzungsmöglichk.</li><li>- Anfangsstellungen für Nachwuchs-kräfte werden frei</li><li>- Transparente Personalpolitik</li></ul> | <ul style="list-style-type: none"><li>- Breite Auswahlmöglichkeit</li><li>- Neue Impulse für den Betrieb (Verringerung der Betriebs-blindheit)</li><li>- Der Externe wird leichter anerkannt</li><li>- Einstellung löst Personalbedarf direkt</li><li>- Eventuell Information über Konkurrenzverhalten</li></ul> |

S. 152 Abb. 19 A



(Fortsetzung)

Nachteile interner und externer Personalbeschaffung

|           | Interne Personalbeschaffung                                                                                                                                                                                                                                                                                                                                                                                                                                                                                                                                                                                                                                                               | Externe Personalbeschaffung                                                                                                                                                                                                                                                                                                                                                           |
|-----------|-------------------------------------------------------------------------------------------------------------------------------------------------------------------------------------------------------------------------------------------------------------------------------------------------------------------------------------------------------------------------------------------------------------------------------------------------------------------------------------------------------------------------------------------------------------------------------------------------------------------------------------------------------------------------------------------|---------------------------------------------------------------------------------------------------------------------------------------------------------------------------------------------------------------------------------------------------------------------------------------------------------------------------------------------------------------------------------------|
| Nachteile | <ul style="list-style-type: none"><li>- Weniger Auswahlmöglichkeiten</li><li>- Ggf. hohe Fortbildungskosten</li><li>- Mögliche Betriebsblindheit</li><li>- Enttäuschung bei Kollegen, evtl. weniger Anerkennung bei Aufrücken in Vorgesetztenfunktion, ggf. auch Spannungen/Rivalitäten</li><li>- Zu starke kollegiale Bindungen, Sachentscheidungen werden verkumpelt</li><li>- Nachlassende Mitarbeiterkreativität wegen Beförderungsautomatik, man verläßt sich auf die Nachfolge (Vertreter wird immer Nachfolger)</li><li>- Versetzung löst Bedarf quantitativ nicht; qualitativ oft nur in Verbindung mit Fortbildung und bei vertikaler Beförderung mit Führungsschulung</li></ul> | <ul style="list-style-type: none"><li>- Größere Beschaffungskosten</li><li>- Höhere externe Einstellungsquote wirkt fluktuations- und frustationsfördernd ("Hier kann man nichts werden")</li><li>- Negative Auswirkung auf das Betriebsklima</li><li>- Höheres Risiko durch Probezeit</li><li>- Keine Betriebskenntnisse (allgemeine Einführung erforderlich, Kosten/Zeit)</li></ul> |

S. 152 Abb. 19B



Ablauf der Bewerberauswahl

| Bewerberauswahl                                                      |                                                         |
|----------------------------------------------------------------------|---------------------------------------------------------|
| I. Festlegen von Anforderungen und Beurteilungskriterien             |                                                         |
| Unternehmensinterne Bewerber                                         | Unternehmensexterne Bewerber                            |
| Ila. Vorauswahl aufgrund betriebsint. Informat- (Personalakten etc.) | Ila. Vorauswahl aufgrund schriftl. Bewerbungsunterlagen |
| II b. Vorauswahl aufgrund von Bewerbungsgesprächen, Tests etc.       |                                                         |
| III. Auswahlentscheidung                                             |                                                         |
| IV. Information des Betriebsrates; Einholen der Stellungnahme        |                                                         |
| V. Eingruppierung, Umgruppierung                                     | V. Einstellung                                          |
| VI. Einarbeitung, evtl. Schulung                                     | VI. Probezeit mit Einarbeitung                          |
| VII. Kontrolle der Auswahlentscheidung durch Personalbeurteilung     |                                                         |

S. 153 Abb. 20



Indirekte Beurteilungsmethode für die Bewerbungsunterlagen (gesamt)

| Bewertung von Bewerbungsunterlagen<br>- gesamt -                                                                                                                                                                                                                                                                                                                                                                                                                                   |                                                                                                                                                                         |
|------------------------------------------------------------------------------------------------------------------------------------------------------------------------------------------------------------------------------------------------------------------------------------------------------------------------------------------------------------------------------------------------------------------------------------------------------------------------------------|-------------------------------------------------------------------------------------------------------------------------------------------------------------------------|
| Kriterium                                                                                                                                                                                                                                                                                                                                                                                                                                                                          | Bewertungshinweise                                                                                                                                                      |
| <p><b>Darstellung</b></p> <ul style="list-style-type: none"><li>• Leserlichkeit</li><li>• Übersichtlichkeit</li></ul> <p><b>Aufbau</b></p> <ul style="list-style-type: none"><li>▪ Chronologisch</li><li>▪ Sinnvoll</li></ul> <p><b>Vollständigkeit</b></p> <ul style="list-style-type: none"><li>• Bewerbungsschreiben</li><li>• Lebenslauf</li><li>▪ Abschlusszeugnisse</li><li>▪ Arbeitszeugnisse</li><li>• Kursnachweise</li><li>• Personalbogen</li><li>▪ Lichtbild</li></ul> | <p>Sind beim Gesamteindruck besondere Abweichungen von der Norm vorhanden</p> <p>Bei Unvollständigkeit der Bewerbungsunterlagen sollte der Grund nachgeprüft werden</p> |

S. 155 Abb. 21

# Aussagefähigkeit von Bewerbungs- unterlagen

| Bewerbungs-<br>unterlagen | Kriterien                                                           | Aussagefähigkeit |        |        |
|---------------------------|---------------------------------------------------------------------|------------------|--------|--------|
|                           |                                                                     | groß             | mittel | gering |
| 1. Anschreiben            | Form<br>Inhalt, Struktur<br>Berufl. Aussagen<br>Berufl. Erwartungen | •<br>•           | •<br>• |        |
| 2. Lebenslauf             | Form<br>Inhalt                                                      | •                | •      |        |
| 3. Foto                   | Größe/ Farbe/ Alter                                                 |                  |        | •      |
| 4. Schulzeugnis           | Ausbildungsdauer<br>Notentrend                                      |                  | •<br>• |        |
| 5. Ausbildungszeugnis     | Ausbildungsdauer<br>Notentrend<br>Benotungsschwerpunkt              | •                | •<br>• |        |
| 6. Weiterbildungszeugnis  | Fachbereiche<br>Bewertung                                           | •<br>•           |        |        |
| 7. Arbeitszeugnis         | Leistung<br>Führung                                                 | •<br>•           |        |        |
| 8. Referenzen             |                                                                     |                  |        | •      |
| 9. Personalbogen          |                                                                     |                  | •      |        |
| 10. Arbeitsproben         |                                                                     | •                |        |        |

S. 155 Abb. 22  
(in Anlehnung an: Knebel, H.:  
Das Vorstellungsgespräch, 14.  
Aufl., Freiburg i. Br. 1993, S.  
63)



Indirekte Beurteilungsmethoden für das Bewerbungsschreiben

| Beurteilung von Bewerbungsschreiben |                                                                                                                                                                                                                                                                                                                                                                                                                                                                                                                                                                                                                                                             |                                                                                                                                                                                                                                                                                                                                                                                                                                       |
|-------------------------------------|-------------------------------------------------------------------------------------------------------------------------------------------------------------------------------------------------------------------------------------------------------------------------------------------------------------------------------------------------------------------------------------------------------------------------------------------------------------------------------------------------------------------------------------------------------------------------------------------------------------------------------------------------------------|---------------------------------------------------------------------------------------------------------------------------------------------------------------------------------------------------------------------------------------------------------------------------------------------------------------------------------------------------------------------------------------------------------------------------------------|
| Analysegrundlagen                   | Kriterium                                                                                                                                                                                                                                                                                                                                                                                                                                                                                                                                                                                                                                                   | Bewertungshinweise                                                                                                                                                                                                                                                                                                                                                                                                                    |
| Bewerbungsschreiben<br>- allgemein  | <p>Aufbau</p> <p>Systematik erkennbar?</p> <ul style="list-style-type: none"><li>• Bewerbungsgrund/Eintrittstermin</li><li>• Gehaltsvorstellung</li></ul> <p>Stil/Wortschatz?</p> <ul style="list-style-type: none"><li>• Flüssig/Unbeholfen</li><li>• Sachlich/Überspitzt</li></ul> <p>Motivation</p> <p>Sachliche Gründe?</p> <ul style="list-style-type: none"><li>• Wechsel des Tätigkeitsbereichs</li><li>• Ausdehnung der Verantwortung</li><li>• Höhe des Gehalts</li></ul> <p>Persönliche Gründe?</p> <ul style="list-style-type: none"><li>• Fehlende Entwicklungsmöglichkeit</li><li>• Ablehnung d. Führungsstils</li><li>• Ortswechsel</li></ul> | <p>Sind Anhaltspunkte zu Eigenschaften wie Sorgfalt, schriftliche Darstellungsvermögen zu erkennen?</p> <p>Gibt es Anhaltspunkte für das schriftliche Ausdrucksvermögen?</p> <p>Bewertung des Bewerbungsgrundes. Die Aussagen, die aus dem Bewerbungsschreiben abgeleitet werden, können im Gespräch überprüft werden.</p> <p><b>Bewerbungsschreiben sind manipulierbar und können ein verzerrtes Bild des Bewerbers liefern.</b></p> |

S. 157 Abb. 23A



**(Forts.)**

|                                                     |                                                                                                                                                                                  |                                                                                                                                                                                                                                                                                                                                       |
|-----------------------------------------------------|----------------------------------------------------------------------------------------------------------------------------------------------------------------------------------|---------------------------------------------------------------------------------------------------------------------------------------------------------------------------------------------------------------------------------------------------------------------------------------------------------------------------------------|
| <p>Anschreiben<br/>- Ausgeschriebene<br/>Stelle</p> | <p>Gibt es einen konkreten Bezug zur Anzeige und den dort geschilderten Anforderungen?</p> <p>Ist die Motivation und das Interesse an der ausgeschriebenen Stelle erkennbar?</p> | <p>Inwieweit hat sich der Bewerber mit der Stelle auseinandergesetzt?</p> <p>Gibt es Anhaltspunkte für die „geistige Beweglichkeit“ des Bewerbers?</p>                                                                                                                                                                                |
| <p>Anschreiben<br/>- Freie Bewerbung</p>            | <p>Warum richtet sich die Bewerbung an diese Firma?</p> <p>Welche Gründe werden hierfür genannt?</p> <p>Grenzt der Bewerber seine Interessen ab?</p> <p>Begründet er dies?</p>   | <p>Zeigt der Bewerber ein konkretes Interesse an dieser Firma?</p> <p>Ist die Begründung schlüssig?</p> <p>Welche Haltung steht dahinter (z.B. Sicherheitsdenken)</p> <p>Schränkt er sein Interessengebiet stark ein oder macht er nur vage Angaben über sein gewünschtes Aufgabengebiet?<br/>Wird ein Zielbewusstsein erkennbar?</p> |



Indirekte Beurteilungsmethoden für Zeugnisse

| Beurteilung von Zeugnissen |                                                                                                                                                                                        |                                                                                                                                                                                                                                                                                                                                    |
|----------------------------|----------------------------------------------------------------------------------------------------------------------------------------------------------------------------------------|------------------------------------------------------------------------------------------------------------------------------------------------------------------------------------------------------------------------------------------------------------------------------------------------------------------------------------|
| Analysegrundlage           | Kriterium                                                                                                                                                                              | Bewertungshinweise                                                                                                                                                                                                                                                                                                                 |
| Schulzeugnisse             | <p>Sind aus den Noten in den einzelnen Fächern besondere Begabungen erkennbar?</p> <p>(Beschränkung der Analyse auf Abschlußzeugnisse)</p>                                             | <p>Zeugnisnoten lassen gewisse Rückschlüsse auf das Leistungsverhalten zu</p> <p>Aussagen über einen Bewerber, die aufgrund der Zeugnisnoten gemacht werden, sollten überprüft werden</p>                                                                                                                                          |
| Hochschulzeugnisse         | <p>Ist aus der Wahl der Studienschwerpunkte eine Zielsetzung erkennbar?</p> <p>Sind die Noten der Schwerpunkte relativ gut?</p> <p>Thema und Note der Diplomarbeit/Bachelor-Thesis</p> | <p>Stimmt die Zielsetzung mit den Anforderungen der zu besetzenden Stelle überein?</p> <p>Der Bewerber hat bei der Diplomarbeit/Thesis selbständig wissenschaftlich gearbeitet, deshalb sind Thema und Note der Arbeit aussagekräftig.</p> <p>Steht das Thema der Diplomarbeit/Thesis in Bezug zum angestrebten Arbeitsgebiet?</p> |

S. 158 Abb. 24



Indirekte Beurteilungsmethode für Arbeitszeugnisse

| Beurteilung von Arbeitszeugnissen |                                                    |                                                                                                          |
|-----------------------------------|----------------------------------------------------|----------------------------------------------------------------------------------------------------------|
| Analysegrundlage                  | Kriterium                                          | Bewertungshinweise                                                                                       |
| Arbeitszeugnisse                  | Beachtung auffälliger Formulierungen               | Unterscheidung <ul style="list-style-type: none"><li>• individuelle Form (eher aussagekräftig)</li></ul> |
|                                   | Vergleich mehrerer Arbeitszeugnisse (wenn möglich) | <ul style="list-style-type: none"><li>• standardisierte Form (weniger aussagefähig)</li></ul>            |

S. 159 Abb. 25  
(in Anlehnung an: Jung, H Kapitel 4, Abschnitt 5. "Das Arbeitszeugnis")



Beurteilungshinweise für den Lebenslauf

| Lebenslauf                                                                                                                                                                                                                                                                                                                                                           |                                                                                                                                                                                                                                                                                                                                                                                                         |
|----------------------------------------------------------------------------------------------------------------------------------------------------------------------------------------------------------------------------------------------------------------------------------------------------------------------------------------------------------------------|---------------------------------------------------------------------------------------------------------------------------------------------------------------------------------------------------------------------------------------------------------------------------------------------------------------------------------------------------------------------------------------------------------|
| Kriterium                                                                                                                                                                                                                                                                                                                                                            | Bewertungshinweise                                                                                                                                                                                                                                                                                                                                                                                      |
| <p><b>Zeitfolgenanalyse</b></p> <ul style="list-style-type: none"><li>• Häufigkeit des Stellenwechsels</li><li>• Zeitdauer der einzelnen Beschäftigungsverhältnisse</li></ul> <p><b>Positionsanalyse</b></p> <ul style="list-style-type: none"><li>• Beruflicher Auf- bzw. Abstieg</li><li>• Sind Trends erkennbar?</li><li>• Besonderheiten im Lebenslauf</li></ul> | <p>Analyse der Gründe für einen Stellenwechsel (Über-/ Unterforderung, Unstetigkeit usw.)</p> <p>Anhaltspunkte für Leistung und Zielstrebigkeit</p> <p>Ist eine Steigerung oder Kontinuität in der beruflichen Entwicklung erkennbar ?</p> <p>(Die Analyse ist aufgrund vielfältiger Einflussmöglichkeiten unter Vorbehalt zu betrachten, eindeutige Aussagen Können meist nicht getroffen werden).</p> |



# Indirekte Beurteilung für Lichtbilder

| Bewertung des Lichtbildes               |                                                                                                                                                                                                 |
|-----------------------------------------|-------------------------------------------------------------------------------------------------------------------------------------------------------------------------------------------------|
| Kriterium                               | Bewertungshinweise                                                                                                                                                                              |
| Einschätzung der äußeren<br>Erscheinung | sehr subjektiv<br><ul style="list-style-type: none"><li>◦ nur bei Extremfällen aussagekräftig</li><li>◦ bei bestimmten Positionen<br/>(z.B. Repräsentationsaufgaben)<br/>eher wichtig</li></ul> |

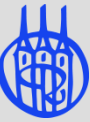

## Personalfragebogen

Immer mehr Unternehmen gehen dazu über, ihre Bewerber mit Personalfragebögen zu konfrontieren, um dadurch einen direkten Vergleich zwischen den Bewerbern zu ermöglichen.

Bei der Erstellung eines Personalfragebogens ist zu beachten, dass der Betriebsrat hinsichtlich des Inhalts ein Mitbestimmungsrecht hat.

Damit so die zusätzlich rechtlich geschützte Privatsphäre gewahrt und möglichen indiskreten Fragen vorgebeugt werden.

Beispiel für einen Personalfragebogen siehe  
S. 162, 163 Abb. 28

## Zulässigkeit von Fragen im Personalfragebogen (bzw. Vorstellungsgespräch)

### **Erlaubt sind:**

alle Fragen, die in einer konkreten Beziehung zu dem angestrebten Arbeitsverhältnis stehen. Dies sind insbesondere der schulische und berufliche Werdegang (Prüfungsnoten) und die allgemeinen persönlichen Verhältnisse (Alter, Familienstand).

### **Unzulässig sind:**

alle Fragen, die auf den rein persönlichen Bereich des Bewerbers abzielen. Hier sind insbesondere Fragen über private Gewohnheiten, Bindungen oder Pläne zu nennen (bevorzugte Verhütungsmittel, geplante Heirat etc.).

### **Problemfragen:**

Gewisse Fragen sind zwar in der Regel unzulässig, in einigen Einzelfällen jedoch erlaubt. Dabei handelt es sich insbesondere um Fragen nach:

#### **•Gewerkschafts-, Religions- oder Parteizugehörigkeit:**

Diese Fragen sind nur in entsprechenden Tendenzbetrieben zulässig (z.B. Frage nach der Religionszugehörigkeit in einem katholischen Kindergarten).

#### **•Vermögensverhältnisse (Schulden):**

Nur dann zulässig, wenn der Bewerber einen Beruf anstrebt, bei dem finanzielle Unabhängigkeit eine wichtige Voraussetzung ist (z.B. Richter, Bankier). Strittig ist in diesem Zusammenhang auch die Frage nach Lohn- und Gehaltspfändungen.

- **Vorstrafen:**

Fragen nach Vorstrafen sind nur erlaubt, wenn diese die Eignung für den angestrebten Beruf in Frage stellen (Unterschlagung bei Buchhaltern, Sittlichkeitsverbrechen bei Ausbildern). Vorstrafen, die nach § 15 Bundeszentralregistergesetz nicht offenbart zu werden brauchen, dürfen in jedem Fall verheimlicht werden.

- **Bisherige Gehaltshöhe:**

Nur dann erlaubt, wenn die bisherige Gehaltshöhe Grundlage der Verhandlungen zum Abschluss des Arbeitsverhältnisses war (z.B. Arbeitnehmer erhält 300,- EUR mehr als bisher)

- **Schwangerschaft:**

Die Frage nach einer Schwangerschaft ist wegen der Geschlechtsdiskriminierung unzulässig (§ 611a BGB). Lediglich in Fällen, in denen die Schwangerschaft die Ausübung des Berufes direkt beeinflusst (Mannequin, Model) ist diese Frage zulässig (vgl. dazu auch die Entscheidung des Europäischen Gerichtshofes: EuGH, NJW 91, 628).

- **Gesundheitszustand:**

Die Frage nach dem Gesundheitszustand und nach Krankheiten des Bewerbers ist nur erlaubt, soweit die Arbeitsfähigkeit des Bewerbers stark betroffen ist. Frühere, ausgeheilte Erkrankungen und Kinderkrankheiten sind in der Regel für das Arbeitsverhältnis nicht relevant und Fragen danach somit unzulässig.





## Indirekte Beurteilungsmethode für Personalbögen

| Bewertung von Personalfragebögen                                             |                                                                        |
|------------------------------------------------------------------------------|------------------------------------------------------------------------|
| Kriterium                                                                    | Bewertungshinweise                                                     |
| Überprüfung der Angaben durch Vergleich mit den übrigen Bewerbungsunterlagen | Unstimmigkeiten mit den Bewerbungsunterlagen können nachgeprüft werden |
| Enthält der Personalfragebogen zusätzliche Informationen?                    | Hat der Bewerber z.B. Gehaltsvorstellungen ?                           |

S. 165 Abb. 30

## Graphologische Gutachten

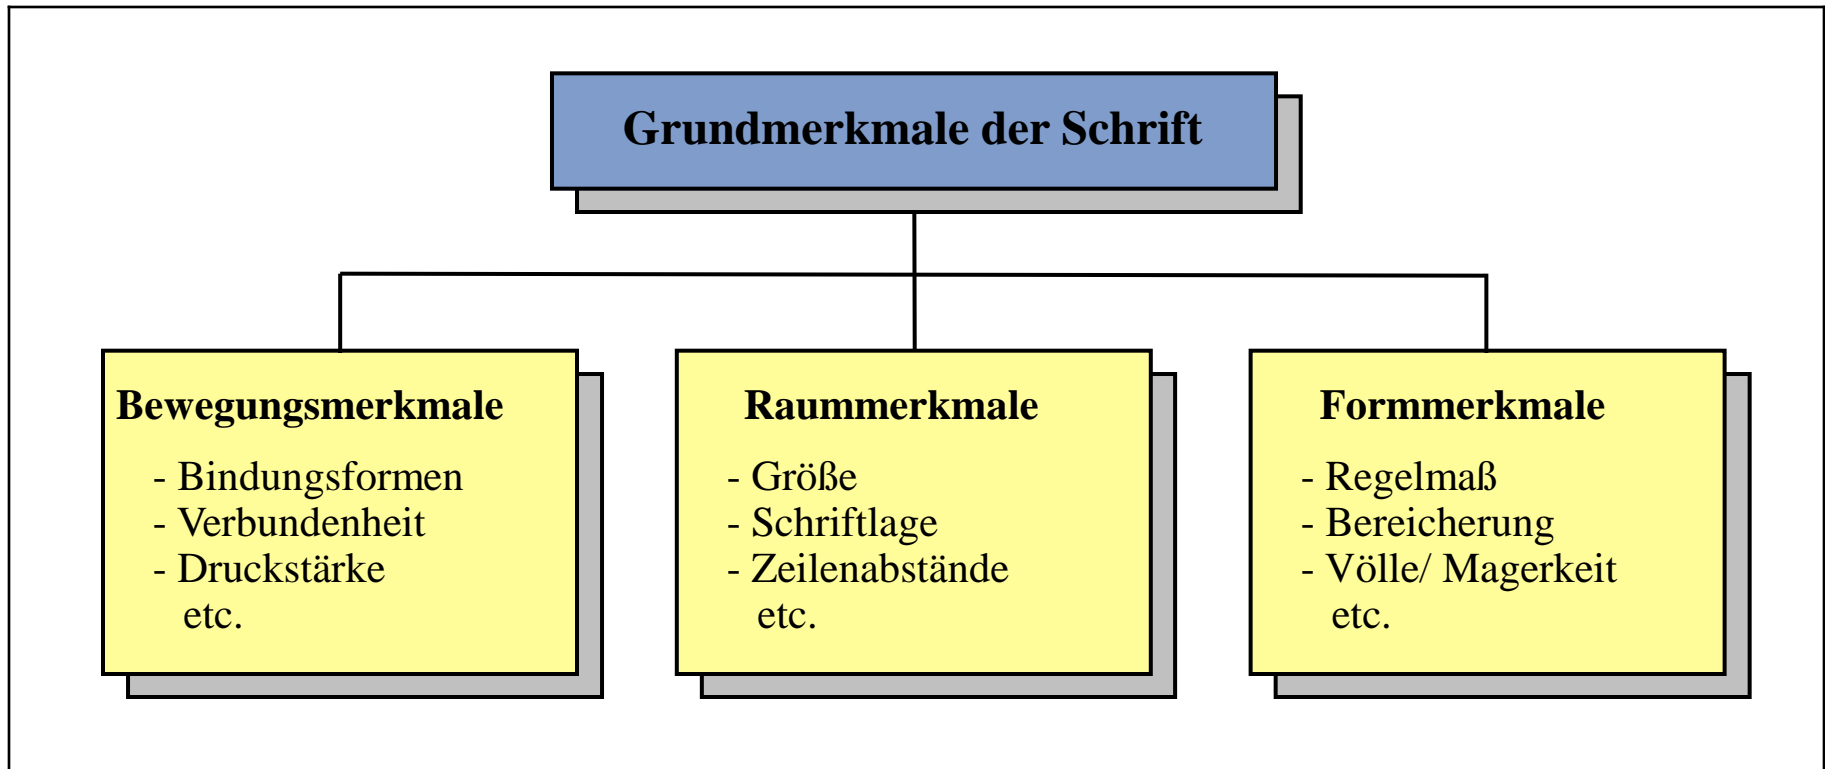

| Bewegungsmerkmale:     |                                                                                                                                                    |                                                                                                                                                                   |
|------------------------|----------------------------------------------------------------------------------------------------------------------------------------------------|-------------------------------------------------------------------------------------------------------------------------------------------------------------------|
| Merkmal                | Ausprägung/Deutung                                                                                                                                 |                                                                                                                                                                   |
| <b>Bindungsformen:</b> | <b>Arkade</b> (oben geschlossene Bögen, ähnlich wie beim "m"):<br>Abschirmung gegenüber der Umwelt, Scheu, Verkrampftheit, Höflichkeit, Anpassung. | <b>Girlande</b> (nach unten geschlossene Bögen, wie beim "u"):<br>Aufgeschlossenheit, Toleranz, Beweglichkeit, Natürlichkeit, Wohlwollen, evtl. Distanzlosigkeit. |
| <b>Verbundenheit:</b>  | <b>Blockbildung</b> (Zusammenhang der Buchstaben in den Worten):<br>Logische Verknüpfungsfähigkeiten, Konsequenz, rasche Auffassung.               | <b>Unverbundenheit</b> (unzusammenhängende Buchstaben):<br>Unlogik, Inkonsequenz, Kontaktstörung, Spontaneität und Kreativität.                                   |
| <b>Druckstärke:</b>    | <b>Druckstarke Schrift</b> (erkennbar an der Profilierung des Papiers):<br>Willensstärke, Energie, Durchsetzungsvermögen.                          | <b>Druckschwache Schrift</b> (Blaß, dünne Linien bei Füllfederhalter):<br>Passivität, Laschheit, mangelnde Entschlossenheit und Zielbewußtheit.                   |

S. 166 Abb. 32A  
(in Anlehnung an: Graphologie, a.a.O, S. 49 ff. und Gauquelin, M.: ABC der Charakterkunde, Bindlach 1990, S. 107 ff)



(Forts.)

| Raummerkmale:   |                                                                                                                         |                                                                                                                                    |
|-----------------|-------------------------------------------------------------------------------------------------------------------------|------------------------------------------------------------------------------------------------------------------------------------|
| Merkmal         | Ausprägung/Deutung                                                                                                      |                                                                                                                                    |
| Größe:          | <b>Große Schrift</b> (Grundstrich übersteigt 3 Millimeter):<br>Hohes Selbstwertgefühl, Darstellungsdrang, Großzügigkeit | <b>Kleine Schrift</b> (Grundstrich kleiner als 3 Millimeter):<br>Geringes Selbstwertgefühl, Kleinlichkeit, Vorsicht, Pflichtgefühl |
| Schriftlage:    | <b>Rechtslage</b> (Winkel der Senkrechten unter 50°C):<br>Außenzugewandt, Weltoffen, Dynamik, Aktivität, Unvernunft     | <b>Linkslage</b> (Winkel der Auf- und Abstriche über 100°C):<br>Ängstlichkeit, Ich-Zuwendung, Anlehnungsbereitschaft               |
| Zeilenabstände: | <b>Große Abstände:</b><br>Selbstbewußtsein, Nonkonformismus, wissenschaftliche Neigungen                                | <b>Kleine Abstände:</b><br>Tendenz zur Einmischung in die Angelegenheiten anderer.                                                 |

S. 166 Abb. 32B  
(in Anlehnung an: Graphologie, a.a.O, S. 49 ff. und Gauquelin, M.: ABC der Charakterkunde, Bindlach 1990, S. 107 ff)

| Formmerkmale:           |                                                                                                                                             |                                                                                                                                       |
|-------------------------|---------------------------------------------------------------------------------------------------------------------------------------------|---------------------------------------------------------------------------------------------------------------------------------------|
| Merkmal                 | Ausprägung/Deutung                                                                                                                          |                                                                                                                                       |
| <b>Regelmaß:</b>        | <b>Regelmäßige Schrift</b> (Gleichmäßigkeit der Schrift):<br>Konformismus, Beherrschung, Ordnungssinn, Angst vor Originalität.              | <b>Unregelmäßige Schrift</b> (Ungleichmäßigkeiten in der Schrift):<br>Unangepaßtheit, Planlosigkeit, Unstetigkeit, Wechselhaftigkeit. |
| <b>Bereicherung:</b>    | <b>Bereicherung</b> (Schrift ist mit Ornamenten, Schnörkeln etc. bereichert):<br>Phantasie, Gefallsucht, Unsachlichkeit, Effekthascherei    | <b>Vereinfachung</b> (unwesentliche Züge fehlen bzw. sind vernachlässigt):<br>Intelligenz, bei starker Vernachlässigung Achtlosigkeit |
| <b>Völle/Magerkeit:</b> | <b>Volle</b> (Rundungen der Schrift sind bewegungsfreudig und ausgefahren):<br>Vitalität und Lebensfreude, von seinen Fähigkeiten überzeugt | <b>Magerkeit</b> (Rundungen fehlen, „eckige“ Schrift):<br>Scharfsinn, Nüchternheit, Phantasielosigkeit, theoretische Denkweise.       |

S. 166 Abb. 32C  
(in Anlehnung an: Graphologie, a.a.O, S. 49 ff. und Gauquelin, M.: ABC der Charakterkunde, Bindlach 1990, S. 107 ff)



Auswertung der Bewerbungsunterlagen

|                                                 |              |  |           |   |   |                         |                      |  |                |
|-------------------------------------------------|--------------|--|-----------|---|---|-------------------------|----------------------|--|----------------|
| Stellennummer:                                  |              |  |           |   |   |                         |                      |  |                |
| Ergebnisse der Prüfung der Bewerbungsunterlagen |              |  |           |   |   | Einfluss des Kriteriums |                      |  |                |
| Kriterium                                       |              |  | Bewertung |   |   |                         | auf die Entscheidung |  |                |
|                                                 |              |  | ++        | + | - | --                      | eher wichtig         |  | eher unwichtig |
| 2. Schulausbildung                              |              |  |           |   |   |                         |                      |  |                |
| 3. Berufsausbildung                             |              |  |           |   |   |                         |                      |  |                |
| 4. Berufserfahrung/ Spez.-Kenntnisse            |              |  |           |   |   |                         |                      |  |                |
| 5. Arbeitszeugnisse/ Praktika                   |              |  |           |   |   |                         |                      |  |                |
| 6. Fächerschwerpunkte                           |              |  |           |   |   |                         |                      |  |                |
| 7. Thema der Diplomarbeit                       |              |  |           |   |   |                         |                      |  |                |
| 8. Studiendauer                                 |              |  |           |   |   |                         |                      |  |                |
| 9. Studienabschluß                              |              |  |           |   |   |                         |                      |  |                |
| 10. Examensnoten                                |              |  |           |   |   |                         |                      |  |                |
| 11. Ort der Fach/- Hochschule                   |              |  |           |   |   |                         |                      |  |                |
| 12. Interesse am Aufgabengebiet                 |              |  |           |   |   |                         |                      |  |                |
| 13. Gesamteindruck der Bewerbung                |              |  |           |   |   |                         |                      |  |                |
|                                                 | Form         |  |           |   |   |                         |                      |  |                |
|                                                 | Inhalt       |  |           |   |   |                         |                      |  |                |
|                                                 | Lichtbild    |  |           |   |   |                         |                      |  |                |
|                                                 | Schriftprobe |  |           |   |   |                         |                      |  |                |
| 14. Sonstiges                                   |              |  |           |   |   |                         |                      |  |                |

Bewerber ist  
☐ überqualifiziert  
☐ unterqualifiziert  
☐ geeignet  
☐ nicht geeignet

Vorstellungsgespräch wird  
☐ erbeten am.....  
☐ nicht empfohlen



## Vorstellungsgespräch

### (1) Organisatorische Gesichtspunkte:

- Der Gesprächstermin sollte so liegen, dass der Bewerber ruhig und ohne Hektik in das Gespräch gehen kann.
- Für das Gespräch muss ein Raum vorhanden sein, in dem man ungestört verhandeln kann.
- Unterlagen, um den Bewerber umfassend zu informieren, (z.B. Organisationspläne, Stellenbeschreibung, Geschäftsbericht usw.) sowie Bewerbungsunterlagen sollten komplett vorhanden sein.

### (2) Technische Gesichtspunkte:

- Wer sind die Gesprächspartner?
- Ist die Reisekostenabrechnung vorbereitet?
- Ist eventuell eine kurze Betriebsbesichtigung notwendig? Wann wird (bei Notwendigkeit) der Arbeitsplatz gezeigt?

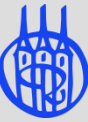

### (3) Taktische Gesichtspunkte:

- Man muss wissen, zu welchen Punkten tiefergehende Fragen wichtig sind (Gibt es Lücken in der beruflichen Entwicklung? Erscheint ein Stellenwechsel logisch? etc.)
- Führt man ein Gespräch mit offenen oder geschlossenen Fragen?
- Wie bringt man den Bewerber dazu, dass er sich "öffnet"? Hier hilft die nicht-direktive Gesprächsführung.
- Mit welchen Argumenten und Einwänden muss man rechnen? Wie können diese geklärt und entkräftet werden?
- Es empfiehlt sich auch, die "Rollen" der Gesprächspartner aus dem Fach- und Personalbereich vorher abzustimmen. Das erhält den "roten Faden" im Gespräch und erhöht die Erkenntniswerte.
- Soll die Entscheidung noch am gleichen Tag gefällt werden?





## Ablauf des Vorstellungsgesprächs

**Phase 1:** Anwärmphase/gegenseitiges Kennenlernen

**Phase 2:** Persönliche private Situation des Bewerbers

**Phase 3:** Bildungsgang

**Phase 4:** Berufliche Entwicklung

**Phase 5:** Vorstellung Unternehmen, Abteilung, Arbeitsgruppe

**Phase 6:** Vertragsverhandlungen

**Phase 7:** Gesprächsabschluss

## Inhalte (Beispiele)

---

---

---

---

---

---

---

## Schlüssel- und Problemfragen im Vorstellungsgespräch

S. 169 ff.

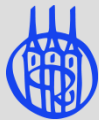

| Ergebnisse des Vorstellungsgesprächs                                                                                                                         |           |   |   |    |                                              |                |
|--------------------------------------------------------------------------------------------------------------------------------------------------------------|-----------|---|---|----|----------------------------------------------|----------------|
| Kriterium                                                                                                                                                    | Bewertung |   |   |    | Einfluss des Kriteriums auf die Entscheidung |                |
|                                                                                                                                                              | ++        | + | - | -- | eher wichtig                                 | eher unwichtig |
| Fachwissen                                                                                                                                                   |           |   |   |    |                                              |                |
| - Wissensbreite                                                                                                                                              |           |   |   |    |                                              |                |
| - Spezialwissen                                                                                                                                              |           |   |   |    |                                              |                |
| - Praxiswissen                                                                                                                                               |           |   |   |    |                                              |                |
| Intellektuelle Fähigkeiten (z.B. Auffassungsgabe, Kreativität etc.)                                                                                          |           |   |   |    |                                              |                |
| Motivation (z.B. Interesse an der Aufgabe, Zielstrebigkeit)                                                                                                  |           |   |   |    |                                              |                |
| Kooperationsvermögen                                                                                                                                         |           |   |   |    |                                              |                |
| Kontaktfähigkeit                                                                                                                                             |           |   |   |    |                                              |                |
| Äußere Erscheinung                                                                                                                                           |           |   |   |    |                                              |                |
| Auftreten                                                                                                                                                    |           |   |   |    |                                              |                |
| Selbstständigkeit                                                                                                                                            |           |   |   |    |                                              |                |
| Urteilsvermögen                                                                                                                                              |           |   |   |    |                                              |                |
| Ausdrucksvermögen                                                                                                                                            |           |   |   |    |                                              |                |
| Belastbarkeit                                                                                                                                                |           |   |   |    |                                              |                |
| Initiative/Dynamik                                                                                                                                           |           |   |   |    |                                              |                |
| Vertrauenswürdigkeit/Offenheit                                                                                                                               |           |   |   |    |                                              |                |
| <b>Weitere Kriterien, die die Entscheidung beeinflussen:</b><br>positiv _____ negativ _____                                                                  |           |   |   |    |                                              |                |
| <b>Entscheidung</b><br><div><div></div><div></div><div></div><div></div><div></div></div> <div>nicht geeignet</div> <div>ohne Einschränkungen geeignet</div> |           |   |   |    |                                              |                |

S. 169 Abb. 34



## Im Assessment-Center werden:

- Die Leistungen und das Verhalten
- Mehrerer Teilnehmer
- Von mehreren Beobachtern
- Auf der Grundlage vorher definierter Anforderungen
- Mit Hilfe verschiedener Methoden
- Beobachtet, beurteilt und bewertet

## Merkmale des Assessment-Center

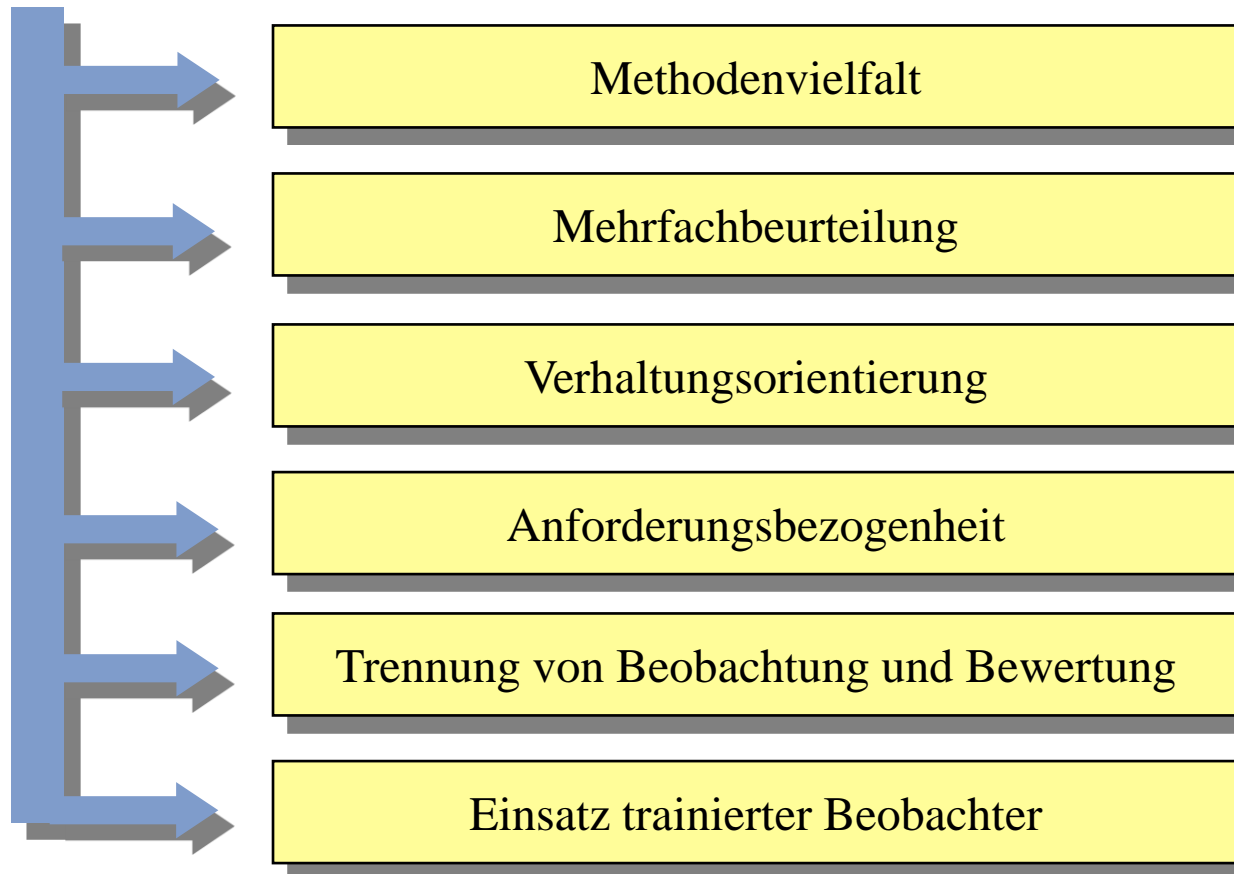

S. 175

(in Anlehnung an: Kanning, U. P./Hofer, S./Schulze Willbrenning, B.: Professionelle Personenbeurteilung. Ein Trainingsmanual, Göttingen/Bern/Toronto/Seattle 2004, S. 319 ff)

Jung, Hans: Personalwirtschaft, 9. Aufl., München 2010

© Oldenbourg Wissenschaftsverlag

## Einsatzgebiete des Assessment-Center

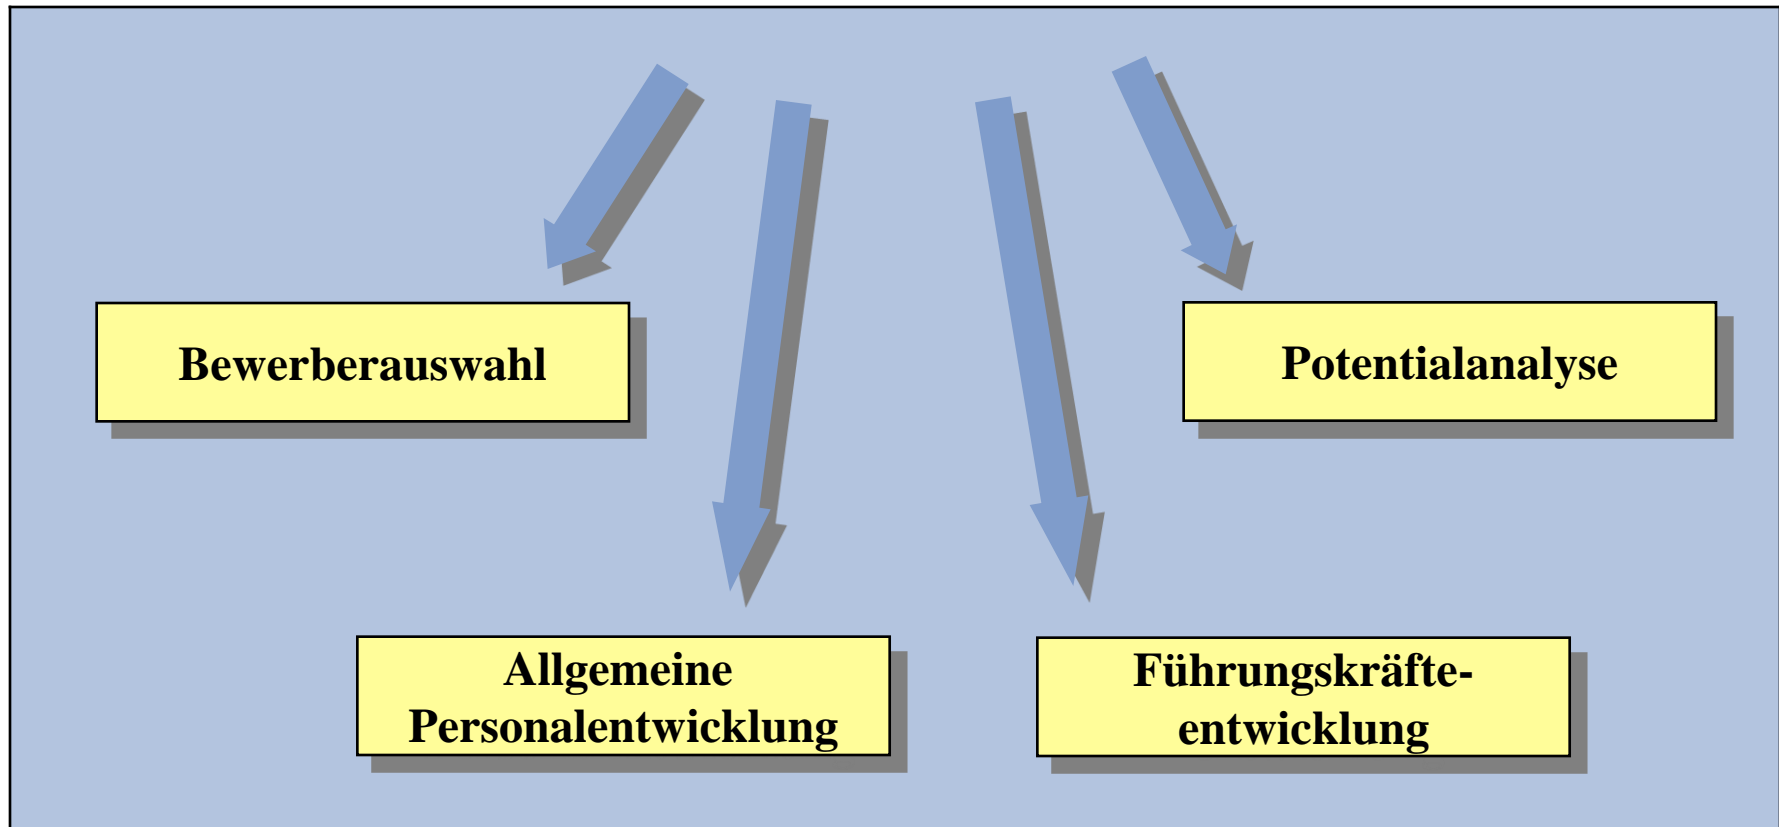

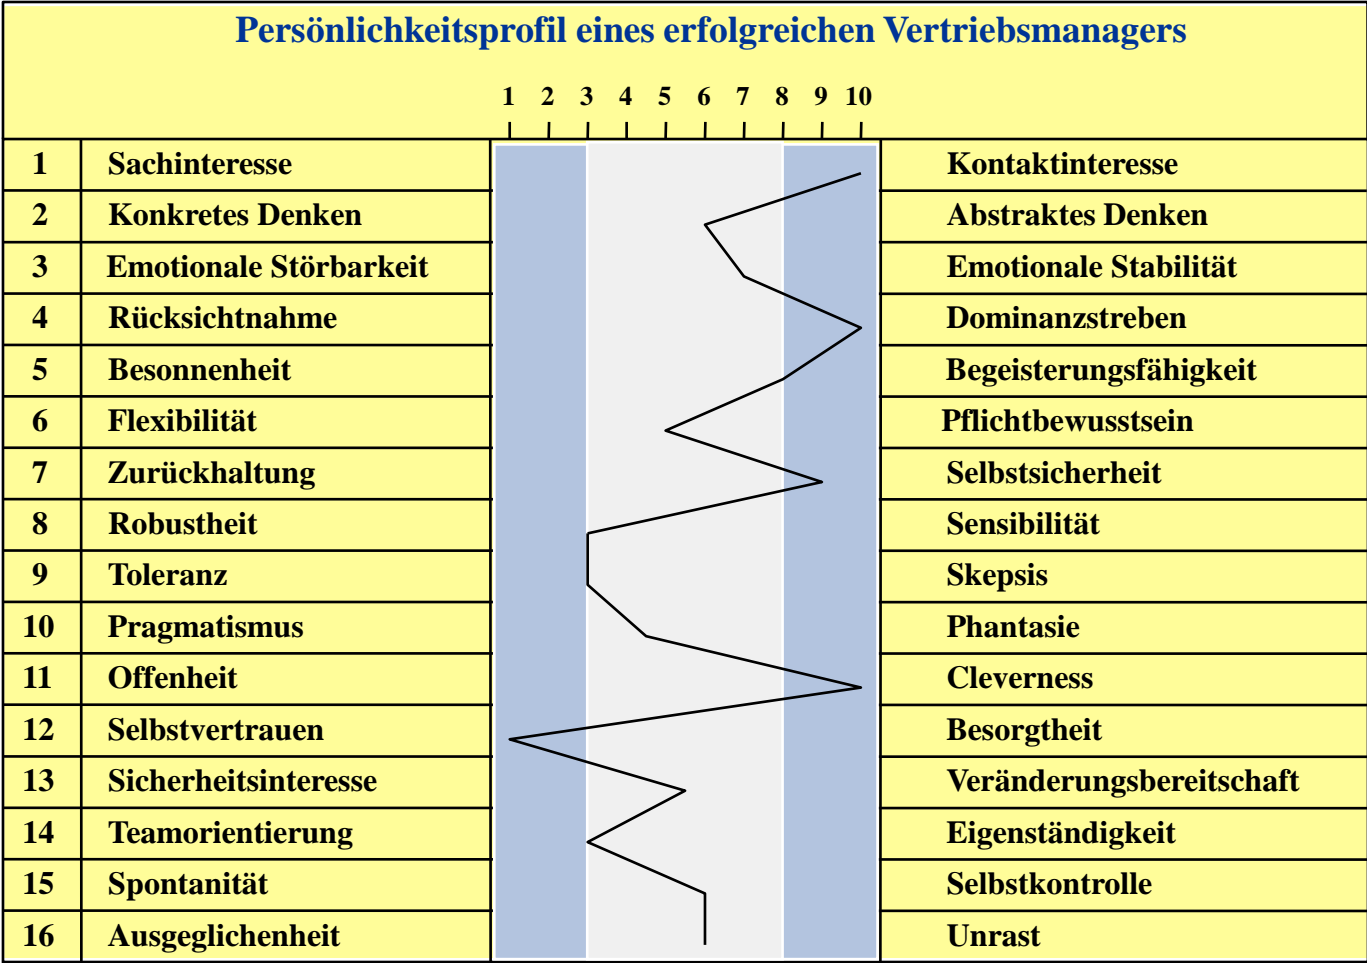

S. 177 Abb. 35

## Übungen im Assessmentcenter

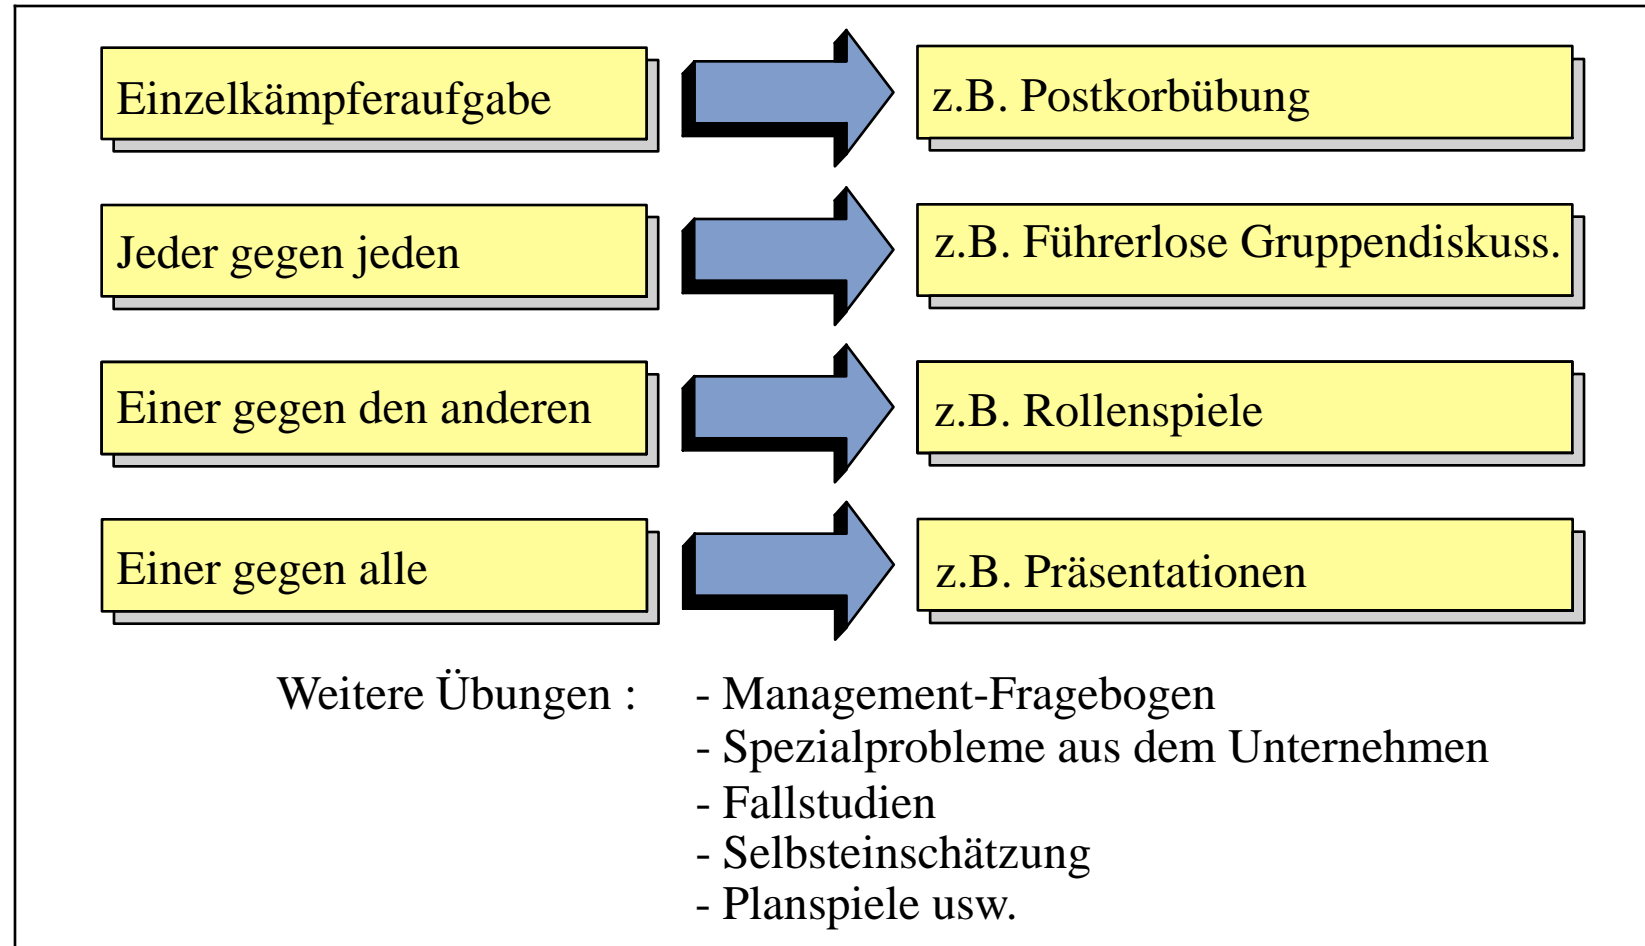

S. 176 Abb. 36



Assessment-Center (1-tägig)

|                   |                                                                                                                                                                            |
|-------------------|----------------------------------------------------------------------------------------------------------------------------------------------------------------------------|
| 8.30 - 9.15 Uhr   | <b>Vorstellung des Unternehmens, Erläuterung des Ablaufes</b>                                                                                                              |
| 9.15 - 9.30 Uhr   | <b>Vorbereitung auf die Aufgabe 1:<br/>Zusammenstellung von Arbeitsinteressen und -schwerpunkten</b>                                                                       |
| 9.30 - 11.30 Uhr  | <b>Aufgabe 1:<br/>Die Teilnehmer stellen sich kurz der Gruppe vor und beschreiben Lebenslauf, Diplomarbeit/Thesis und ihr Interesse an einer Tätigkeit im Unternehmen.</b> |
| 11.30 - 11.45 Uhr | <b>Vorbereitung auf die Aufgabe 2</b>                                                                                                                                      |
| 11.45 - 13.00 Uhr | <b>Aufgabe 2 (Fallbeispiel):<br/>Eigene Lösungsdarstellung des Fallbeispiels</b>                                                                                           |
| 13.00 - 14.30 Uhr | <b>Gemeinsames Mittagessen</b>                                                                                                                                             |
| 14.30 - 16.00 Uhr | <b>Aufgabe 3:<br/>Gruppendiskussion und gemeinsame Lösungsfindung zum Fallbeispiel.</b>                                                                                    |
| 16.00 - 17.30 Uhr | <b>Auswertung und Abschlussgespräch</b>                                                                                                                                    |

S. 177 Abb. 37





Bewertungsbogen für die Selbstdarstellung

| Kriterium \ Bewerber (Name)                                                     | A         | B         | C         | D         | E         | F         |
|---------------------------------------------------------------------------------|-----------|-----------|-----------|-----------|-----------|-----------|
|                                                                                 |           |           |           |           |           |           |
| 1. Rhetorik<br>spricht flüssig und verständlich                                 | 1-2-3-4-5 | 1-2-3-4-5 | 1-2-3-4-5 | 1-2-3-4-5 | 1-2-3-4-5 | 1-2-3-4-5 |
| 2. Selbstsicherheit<br>sicheres Auftreten, beherrscht, behält die Übersicht     | 1-2-3-4-5 | 1-2-3-4-5 | 1-2-3-4-5 | 1-2-3-4-5 | 1-2-3-4-5 | 1-2-3-4-5 |
| 3. Fachwissen<br>verfügt über Fachwissen stellt Fachaspekte richtig dar         | 1-2-3-4-5 | 1-2-3-4-5 | 1-2-3-4-5 | 1-2-3-4-5 | 1-2-3-4-5 | 1-2-3-4-5 |
| 4. Transfer des Fachwissens<br>verständliche Darstellung praxisbezogene Sprache | 1-2-3-4-5 | 1-2-3-4-5 | 1-2-3-4-5 | 1-2-3-4-5 | 1-2-3-4-5 | 1-2-3-4-5 |
| Sonstige Kommentare:                                                            |           |           |           |           |           |           |

S. 179 Abb. 38



## Einzel-Assessment für das Topmanagement:

### Beurteilungsbausteine:

- ➔ Führungsgespräch
- ➔ Auswertungs- und Organisationsarbeiten mit Schriftverkehr, Postkorbsimulation
- ➔ Simulierte Verkaufs- und Vergabeverhandlung
- ➔ Problemanalyse und Maßnahmenplanung für ineffizient arbeitende Abteilungen

# Checkliste zur Einführung neuer Mitarbeiter

|                        |                                                                                                                                                                                                                                                                                                                        |
|------------------------|------------------------------------------------------------------------------------------------------------------------------------------------------------------------------------------------------------------------------------------------------------------------------------------------------------------------|
| <b>I. Vorbereitung</b> | <ul style="list-style-type: none"> <li>- Arbeitslohn und Zeit für Einführung vormerken</li> <li>- Genauen Einsatz planen</li> <li>- Arbeitsplatz vorbereiten</li> <li>- Arbeitsunterlagen überprüfen</li> <li>- Vorgesetzten und Kollegen unterrichten</li> <li>- Einarbeitung übertragen an (Betriebspate)</li> </ul> |
| <b>II. Begrüßung</b>   | <ul style="list-style-type: none"> <li>- Persönliches Gespräch (Werdegang und Ziele)</li> <li>- Überblick über Betriebsorganisation geben</li> <li>- Schwerpunkte seines Arbeitsgebietes erläutern</li> <li>- Evtl. vorhandene Einführungsvorschriften erläutern</li> </ul>                                            |
| <b>III. Vorstellen</b> | <ul style="list-style-type: none"> <li>- Beim unmittelbaren Vorgesetzten</li> <li>- Bei den künftigen Kollegen</li> <li>- Bei dem Mitarbeiter, der ihn einarbeitet</li> <li>- Bei anderen Mitarbeitern, mit denen er zu tun hat</li> </ul>                                                                             |
| <b>IV. Orientieren</b> | <ul style="list-style-type: none"> <li>- Arbeitsplatz zeigen</li> <li>- Waschräume, Toiletten</li> <li>- Sanitätseinrichtungen, Erste Hilfe</li> <li>- Kantine (Essensmarken bzw. Essenszuschuss)</li> </ul>                                                                                                           |

|                           |                                                                                                                                                                                                                                                                                                                                                                                   |
|---------------------------|-----------------------------------------------------------------------------------------------------------------------------------------------------------------------------------------------------------------------------------------------------------------------------------------------------------------------------------------------------------------------------------|
| <b>V. Informieren</b>     | <ul style="list-style-type: none"> <li>- Die wichtigsten Arbeitsunterlagen</li> <li>- Sicherheitsvorschriften, Hinweise auf besondere Unfallgefahren</li> <li>- Hinweise über Verhalten bei Unfall, Krankheit</li> <li>- Arbeitszeit, Pausen, Urlaubsregelung, Entgeltzahlungstermin</li> </ul>                                                                                   |
| <b>VI. Einarbeiten</b>    | <ul style="list-style-type: none"> <li>- Stellenbeschreibung aushändigen</li> <li>- Unterlagen und Arbeitsabläufe erklären</li> <li>- Über Arbeitsgänge im Einzelnen unterweisen</li> <li>- Arbeitsergebnisse besprechen</li> </ul>                                                                                                                                               |
| <b>VII. Nachbereitung</b> | <ul style="list-style-type: none"> <li>- Um den Neuen systematisch kümmern, seinen unmittelbaren Vorgesetzten und ihn selbst nach seinen Erfahrungen fragen, Fortschritte anerkennen, Fragen beantworten, ggf. zusätzliche Hilfestellungen geben: <ul style="list-style-type: none"> <li>- nach 1 Woche</li> <li>- nach 4 Wochen</li> <li>- nach 3 Monaten</li> </ul> </li> </ul> |

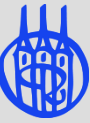

## Notizen

## 3. Personaleinsatzplanung

- 3.1 Aufgaben der Personaleinsatzplanung
- 3.2 Informationsgrundlagen des Personaleinsatzes
- 3.3 Voraussetzungen des Personaleinsatzes
- 3.4 Wechselseitige Anpassung von Stelle und Stelleninhaber
- 3.5 Flexibilisierung und Individualisierung der Arbeit
- 3.6 Methoden der Zuordnung von Stellen und Stelleninhaber
- 3.7 Einsatz von bestimmten Arbeitnehmergruppen
- 3.8 Rechtliche Aspekte des Personaleinsatzes

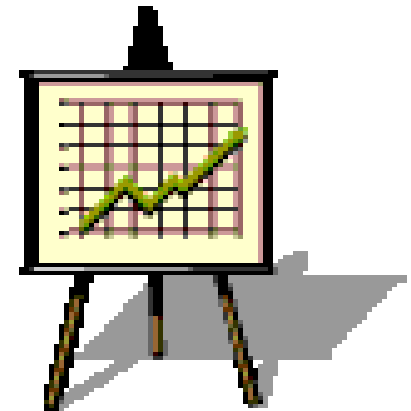

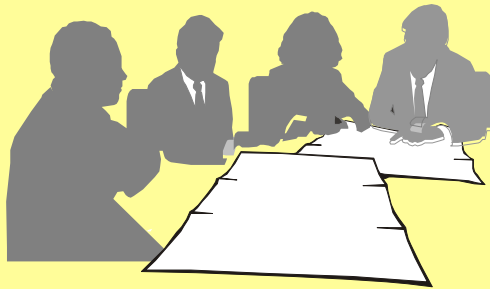

## Planungsaufgabe

- Wie viele Mitarbeiter benötigen wir?
- Welche Qualifikationen sollten die Mitarbeiter für die Tätigkeiten aufweisen?
- Ab wann und für welchen Zeitraum werden die Mitarbeiter eingesetzt?
- Wo ist der Einsatzort der Mitarbeiter?

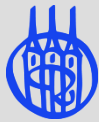

Personaleinsatzplanung

| Aufgaben der Einsatzplanung |                                                                                                                 |
|-----------------------------|-----------------------------------------------------------------------------------------------------------------|
| Kurzfristig                 | Zuordnung<br>- zeitlich<br>- kapazitätsmäßig                                                                    |
| Mittel- und langfristig     | Anpassung<br>- der Arbeitskräfte an die Arbeitsanforderungen<br>- der Arbeitsanforderungen an die Arbeitskräfte |

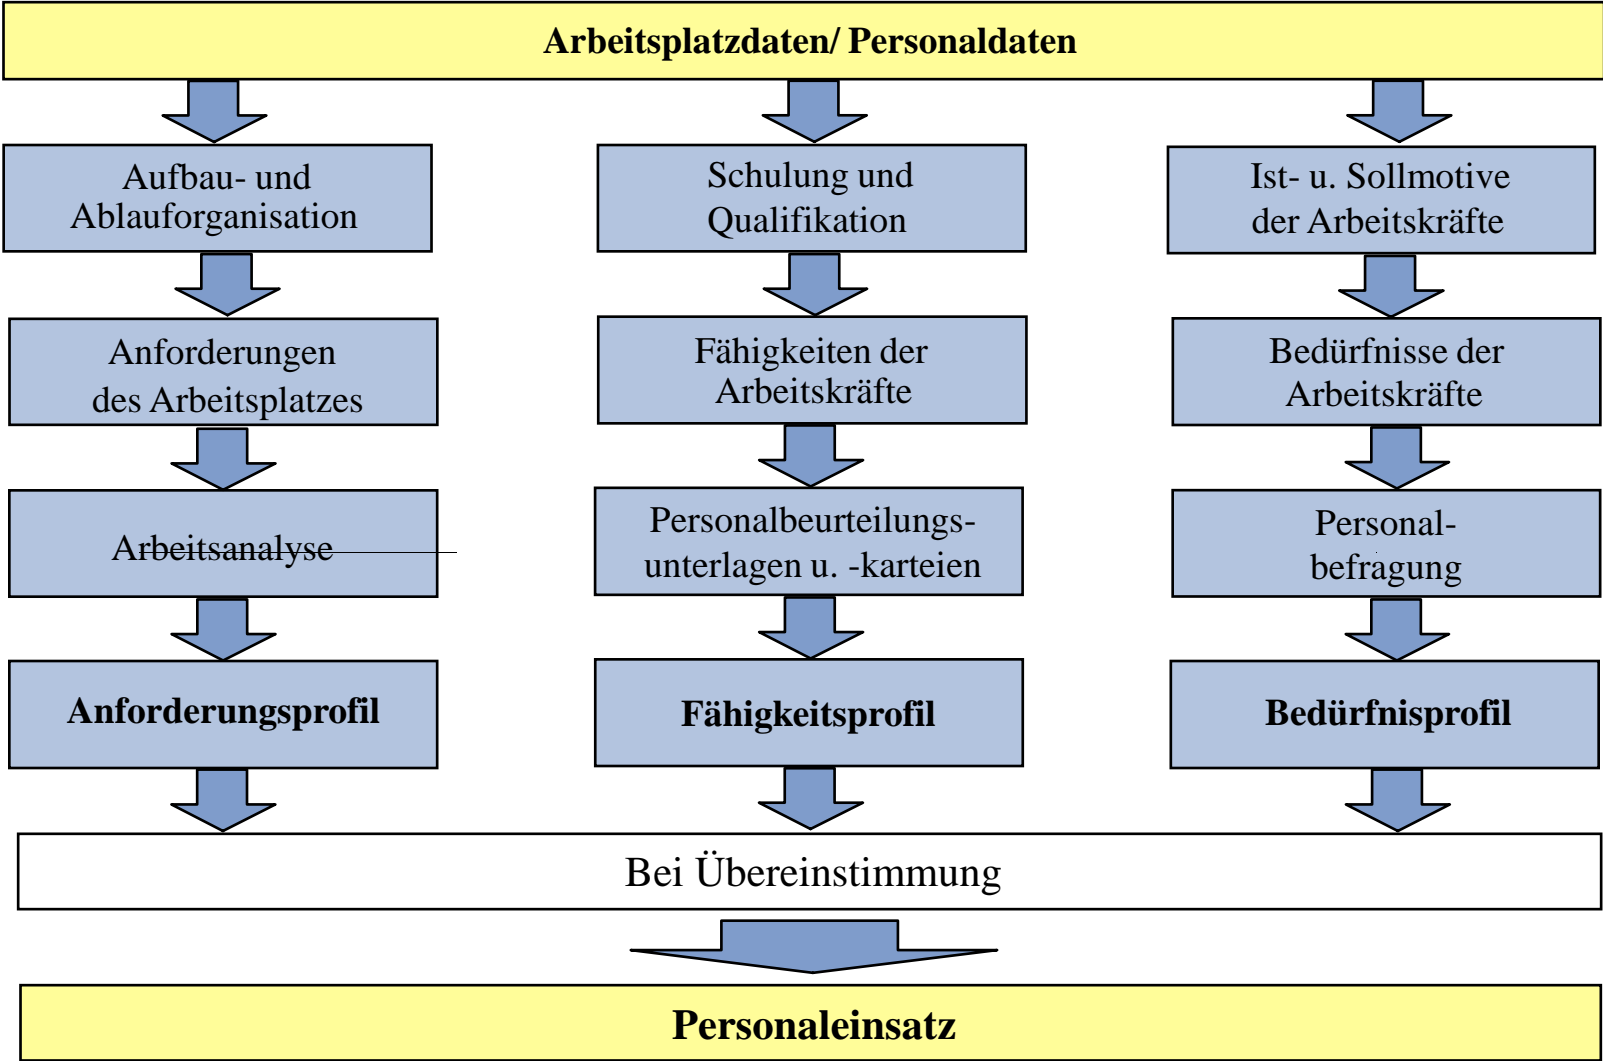

S. 189 Abb. 42



# Methode des Profilvergleichs

| Nr.: | Anforderungsart         | Anforderungswert | Fähigkeitswert | Gewichtung | Profilvergleich |
|------|-------------------------|------------------|----------------|------------|-----------------|
| 1    | Fachliche Qualifikation | 4                | 5              | 40 %       | + 0,4           |
| 2    | Psychische Belastung    | 2                | 1              | 20 %       | - 0,2           |
| 3    | Sensomotorik            | 4                | 4              | 20 %       | ± 0,0           |
| 4    | Körperliche Belastung   | 3                | 4              | 10 %       | + 0,1           |
| 5    | Gruppenverhalten        | 3                | 2              | 10 %       | - 0,1           |
|      | Summe                   | 16               | 16             | 100 %      | + 0,2           |

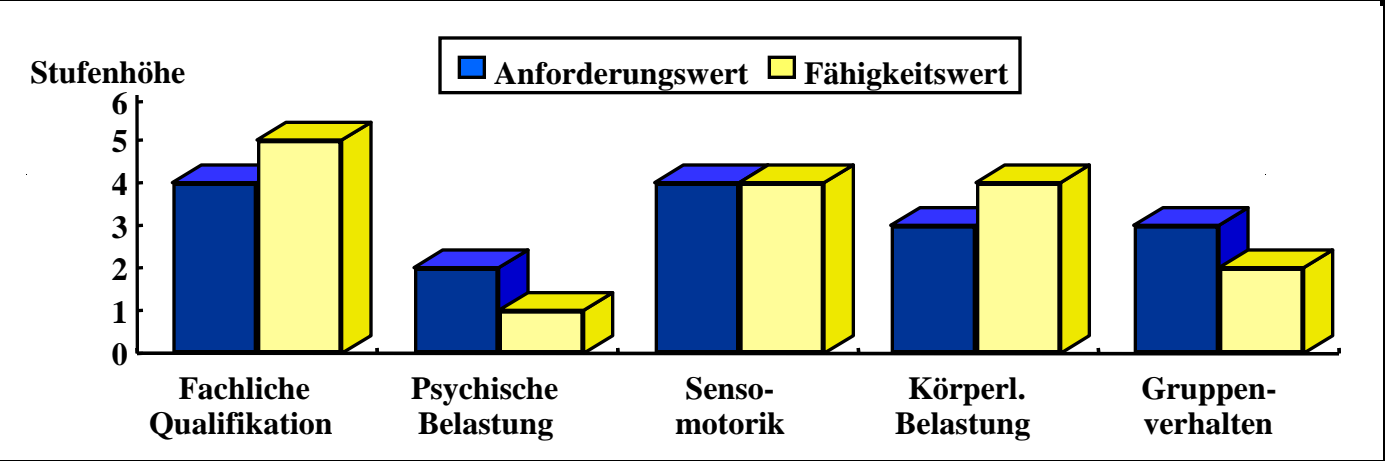

S. 190 Abb. 43



Stellenplan (Beispiele)

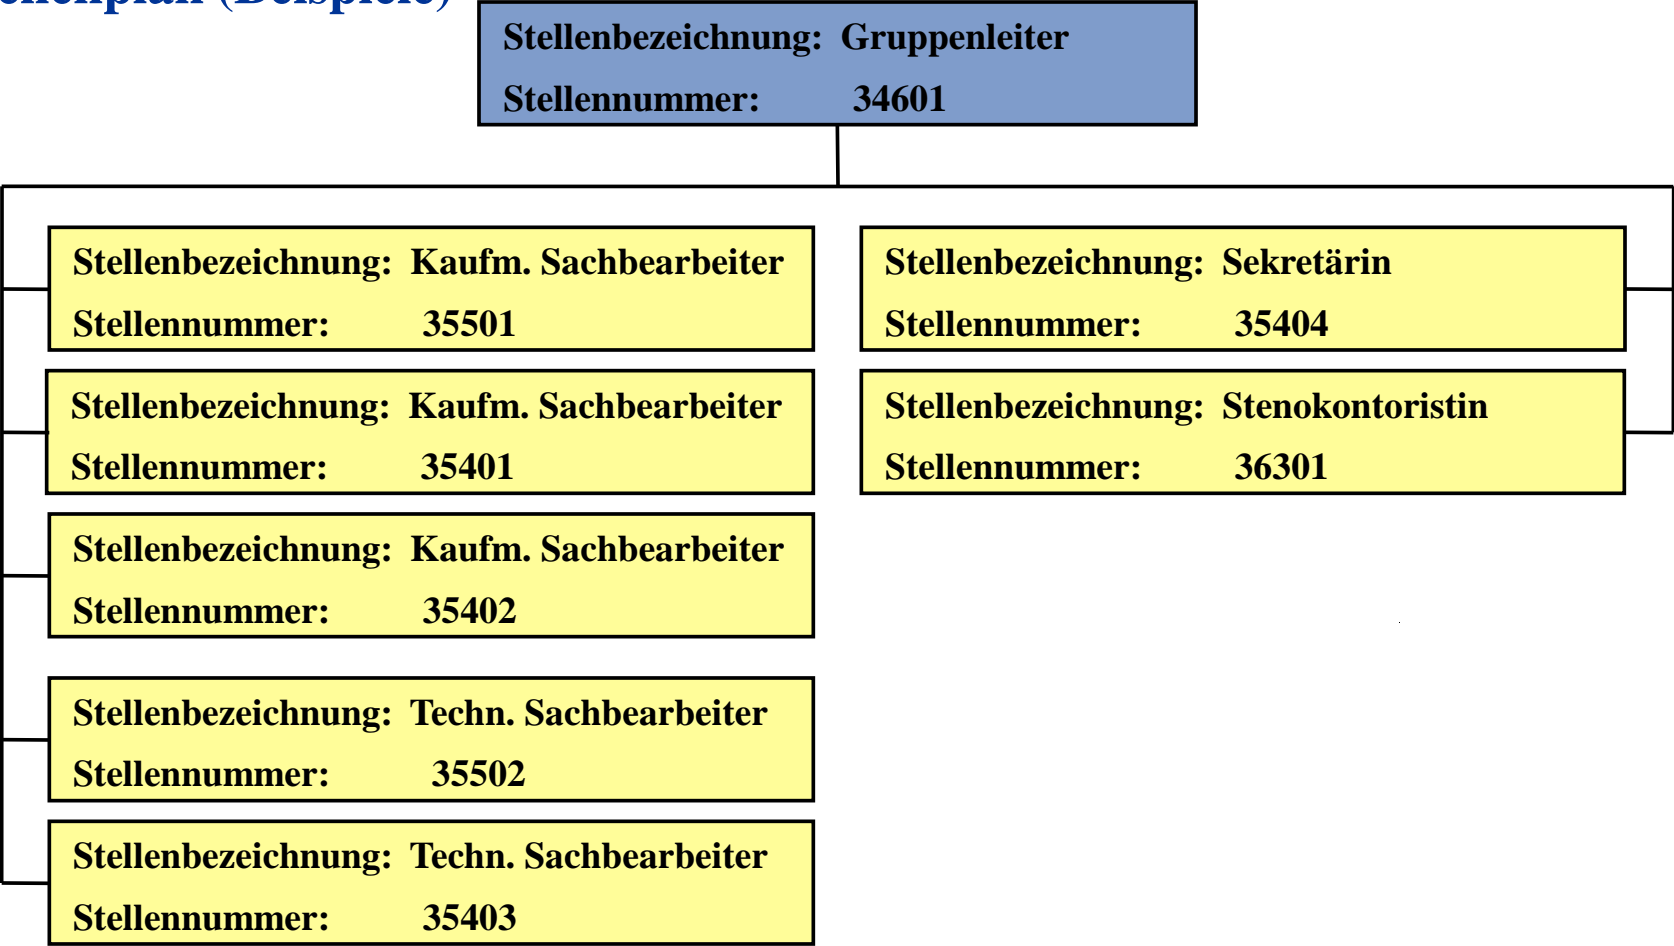

S. 191 Abb. 44

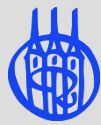

Strukturierung eines Planstellenkennzifferschlüssels

|                                 |                                                                                                                                                                                                                      |
|---------------------------------|----------------------------------------------------------------------------------------------------------------------------------------------------------------------------------------------------------------------|
| 1. Stelle der Kennziffer        | <b>Unternehmensbereich:</b><br>1 = Unternehmensleitung<br>2 = Produktion<br>3 = Vertrieb<br>4 = Materialwirtschaft<br>5 = Personal/ Verwaltung                                                                       |
| 2. Stelle der Kennziffer        | <b>Hierarchiestufe:</b><br>1 = Geschäftsführung<br>2 = Hauptabteilungsleiter<br>3 = Abteilungsleiter<br>4 = Gruppenleiter, Meister<br>5 = Sachbearbeiter, Sekretärin<br>6 = Bürohilfskräfte, gewerbliche Mitarbeiter |
| 3. Stelle der Kennziffer        | <b>Tarifgruppe:</b><br>1 = K1, T1 ... 6 = K6, T6<br>7 = AT                                                                                                                                                           |
| 4. und 5. Stelle der Kennziffer | Laufende Zählnummer der Planstellen eines Unternehmensbereiches                                                                                                                                                      |

S. 192 Abb. 45

# Kombination von Stellen-, Stellenbewertungs- und Stellenbesetzungsplan

| Abt./ Betrieb: Verkauf Bayern                                |             |                     |                                    |                       |                 |                | Stand: 2011   |    |                                   |
|--------------------------------------------------------------|-------------|---------------------|------------------------------------|-----------------------|-----------------|----------------|---------------|----|-----------------------------------|
| Filiale: .....                                               |             |                     |                                    |                       |                 |                |               |    |                                   |
| Bereich: Vertrieb                                            |             |                     |                                    |                       |                 |                |               |    |                                   |
| Zahl der Stellen                                             | Stellen Nr. | Stellenbezeichnung  | Ausbildung nach Anforderungsprofil | Stellenbewertung Soll | Tarifgruppe Ist | Stelleninhaber | Veränderungen |    | Begründung                        |
| 1                                                            | 34601       | Gruppenleiter       | Dipl.-Kfm./<br>Dipl.-Wirt.Ing.     | K6                    | K6              | Brun, G        | -             | -1 | Ersatzbeschaffung/<br>Kündigung   |
| 1                                                            | 35404       | Sekretärin          | Sekretärin                         | K4                    | K4              | Bulk, D        | -             | -1 | Versetzung                        |
| 3                                                            | 35501       | Kfm.<br>Sachbearb   | Betriebswirt                       | K5                    | K5              | Arnt, B        | +2            | -  | Ausbau des Vertriebsnetzes        |
|                                                              | 35401       |                     | Industriekaufm.                    | K4                    | K4              | Ruf, H         | -             | -1 | Ersatz für Mitarbeiter in Pension |
|                                                              | 35402       |                     | Industriekaufm.                    | K4                    | K5              | Rutte, R       |               |    |                                   |
| 2                                                            | 35502       | Techn.<br>Sachbearb | Dipl.-Ing. (FH)                    | T5                    | T4              | Weiß, P        | -             | -  | Vertriebsnachwuchs                |
|                                                              | 35403       |                     | Techniker                          | T4                    | -               |                | -             | -1 | freie Stelle                      |
| 1                                                            | 36301       | Stenokontoristin    | Bürogehilfin                       | K3                    | -               | -              | -             | -1 | freie Planstelle                  |
| 8                                                            |             |                     |                                    |                       |                 |                | +2            | -5 |                                   |
| Stellenplan                                                  |             |                     |                                    |                       |                 |                |               |    |                                   |
| Stellenplan und Stellenbewertungsplan                        |             |                     |                                    |                       |                 |                |               |    |                                   |
| Stellenplan, Stellenbewertungsplan und Stellenbesetzungsplan |             |                     |                                    |                       |                 |                |               |    |                                   |

S. 193 Abb. 46

## Stellenbesetzungsplan

| Abt./ Betrieb: Verkauf Bayern<br>Filiale: .....<br>Bereich: Vertrieb |                    |                 |                 | Geschäftsjahr: 2011                             |   |   |   |      |   |   |   |      |   |   |   |
|----------------------------------------------------------------------|--------------------|-----------------|-----------------|-------------------------------------------------|---|---|---|------|---|---|---|------|---|---|---|
| Stellen-Nr.                                                          | Stellenbezeichnung | Stellen-inhaber | Jahr<br>Quartal | 2011                                            |   |   |   | 2012 |   |   |   | 2013 |   |   |   |
|                                                                      |                    |                 |                 | 1                                               | 2 | 3 | 4 | 1    | 2 | 3 | 4 | 1    | 2 | 3 | 4 |
| 34601                                                                | Gruppenleiter      | Brun, G.        |                 | Kündigung zum Q4; Ersatz u. Einarbeitung zum Q3 |   |   |   |      |   |   |   |      |   |   |   |
| 35502                                                                | Techn. Sachbearb.  | Weiß, P.        |                 |                                                 |   |   |   |      |   |   |   |      |   |   |   |
| 35403                                                                | Techn. Sachbearb.  | -               |                 | voraussichtl. Besetzung Q2 2011                 |   |   |   |      |   |   |   |      |   |   |   |
| 35501                                                                | Kfm. Sachbearb.    | Arnt, B.        |                 | Neueinstellung zwecks Vertriebsausbau           |   |   |   |      |   |   |   |      |   |   |   |
| 35401                                                                | Kfm. Sachbearb.    | Ruf, H.         |                 | Neueinstellung zwecks Vertriebsausbau           |   |   |   |      |   |   |   |      |   |   |   |
| 35402                                                                | Kfm. Sachbearb.    | Rutte, R.       |                 | Teilzeit bis Ende 2011                          |   |   |   |      |   |   |   |      |   |   |   |
| 35404                                                                | Sekretärin         | Bulk, D.        |                 | Versetzung von Frau Schmidt, ab Q3 Frau Bulk    |   |   |   |      |   |   |   |      |   |   |   |
| 36301                                                                | Stenokontoristin   | -               |                 | bleibt unbesetzt                                |   |   |   |      |   |   |   |      |   |   |   |

S. 194 Abb. 47

# Funktionale Organisationsstruktur

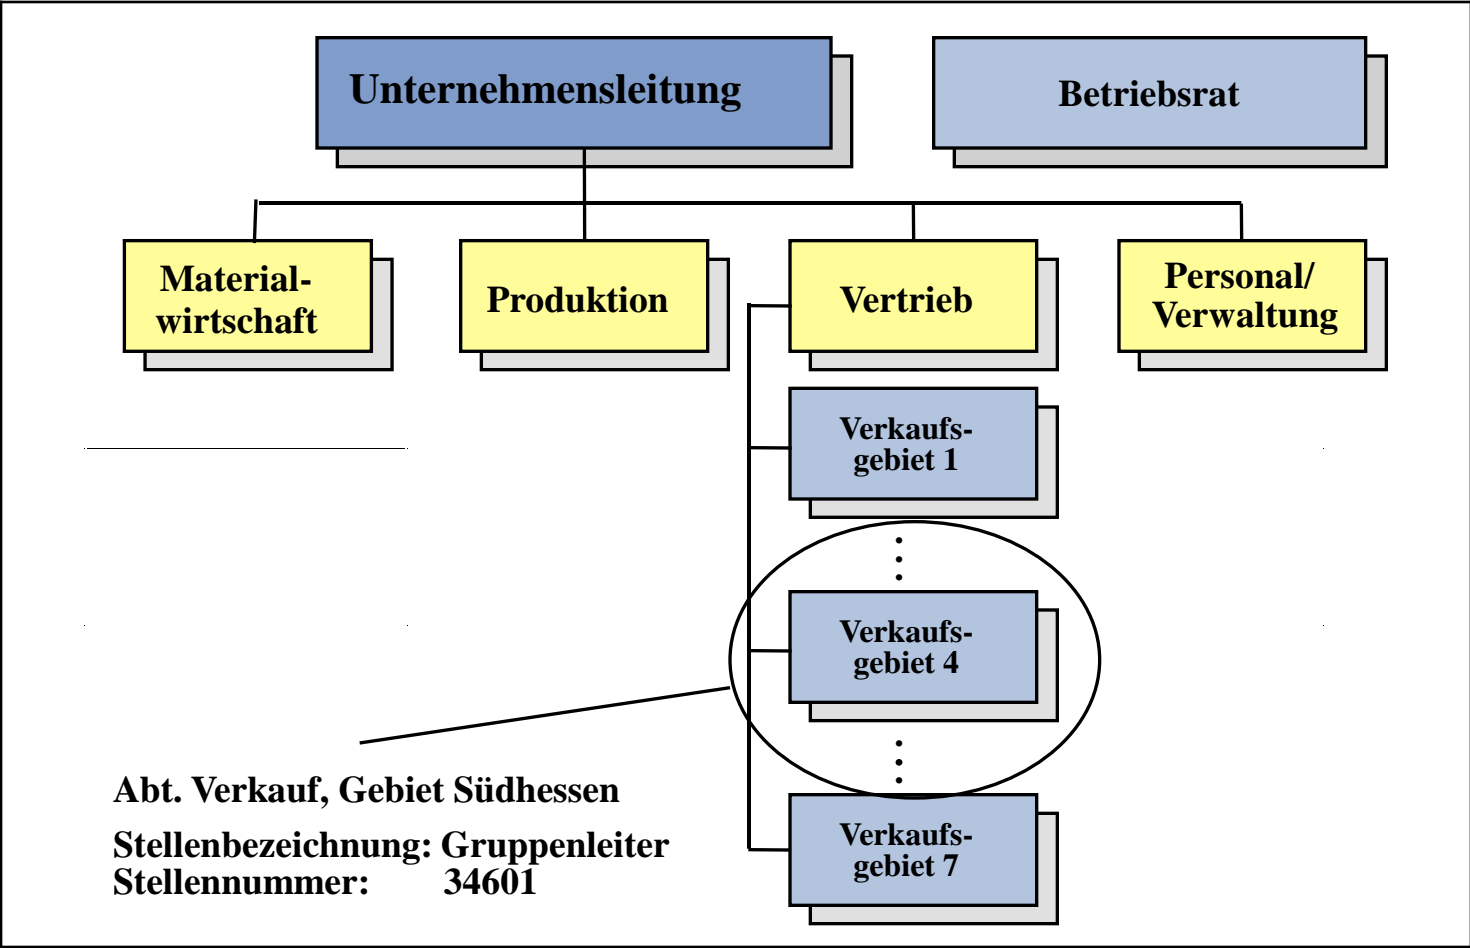

S. 195 Abb. 48



| Stellenbeschreibung             |                                                                                              |
|---------------------------------|----------------------------------------------------------------------------------------------|
| Stellenbezeichnung, -nummer:    |                                                                                              |
| Organisatorische Eingliederung: |                                                                                              |
| Hierarchische Einordnung:       | Unterstellung<br>Überstellung                                                                |
| Aufgaben:                       |                                                                                              |
| Ziele:                          |                                                                                              |
| Kompetenzen:                    | Sachkompetenz<br>Personalkompetenz                                                           |
| Verantwortung:                  |                                                                                              |
| Vertretung:                     | aktiv<br>passiv                                                                              |
| Anforderungsprofil:             | Ausbildung<br>Fachkenntnisse<br>Erfahrungen<br>persönliche Eigenschaften<br>Zusatzkenntnisse |
| Vergütungsrahmen:               |                                                                                              |

S. 196 ff. vgl. Abb. 49, 50, 51

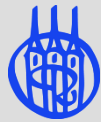

Anteil von energetischer und informatorischer Arbeit am Arbeitsinhalt

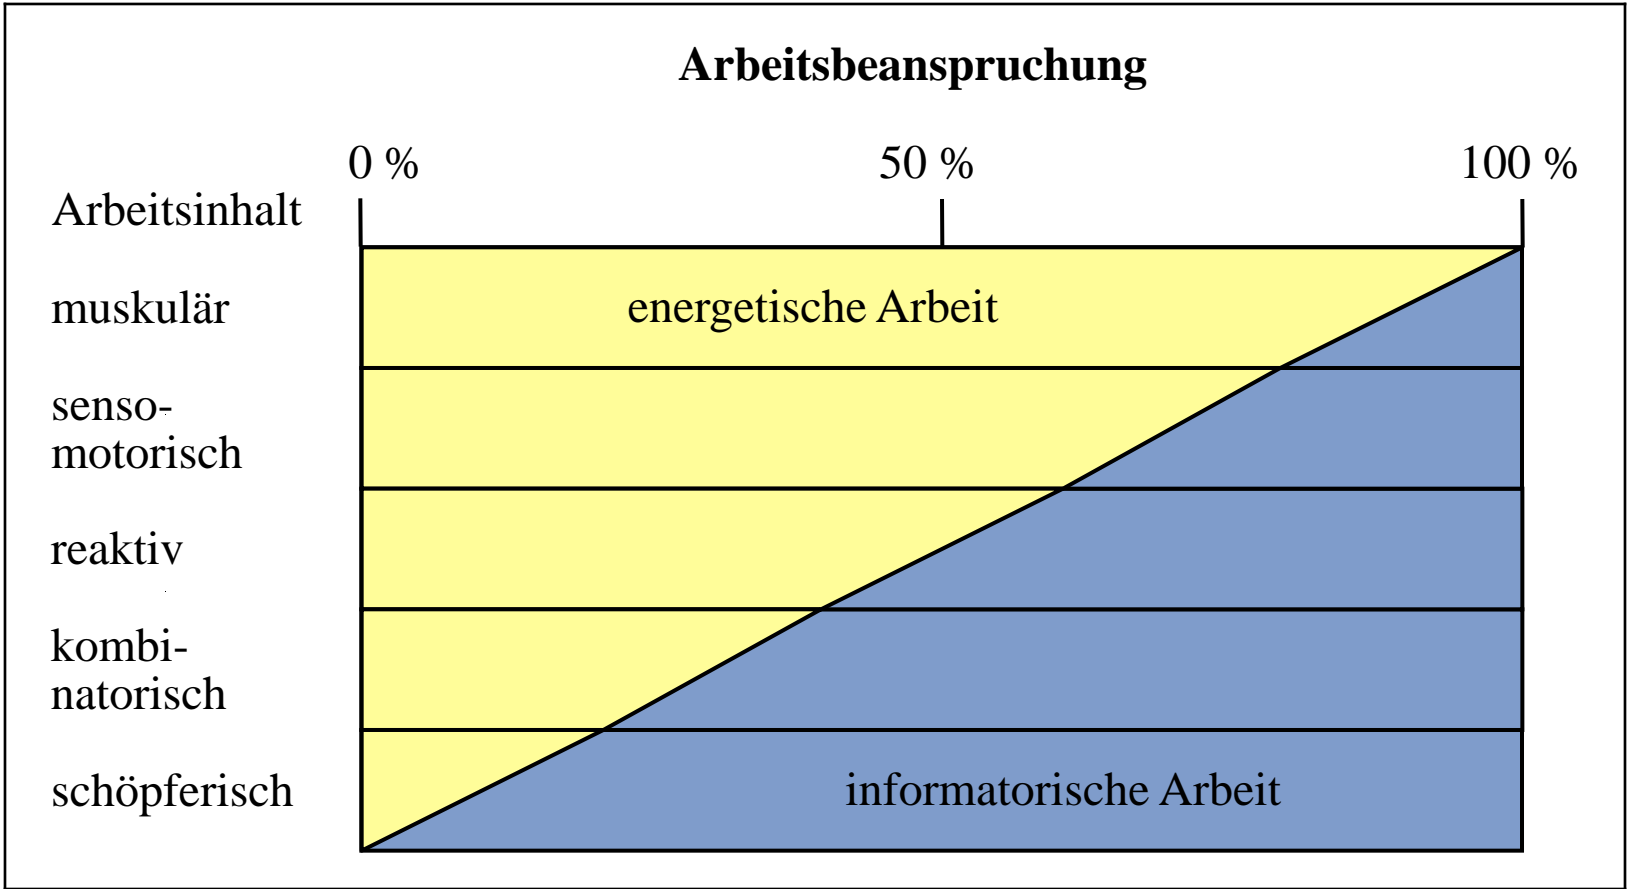

S. 202 Abb. 52  
(in Anlehnung an: Rohmert, W.: Praktische Arbeitsphysiologie, 3. Aufl. , Stuttgart/New York 1983, S. 25)





Bestimmungsfaktoren menschlicher Arbeitsleistung

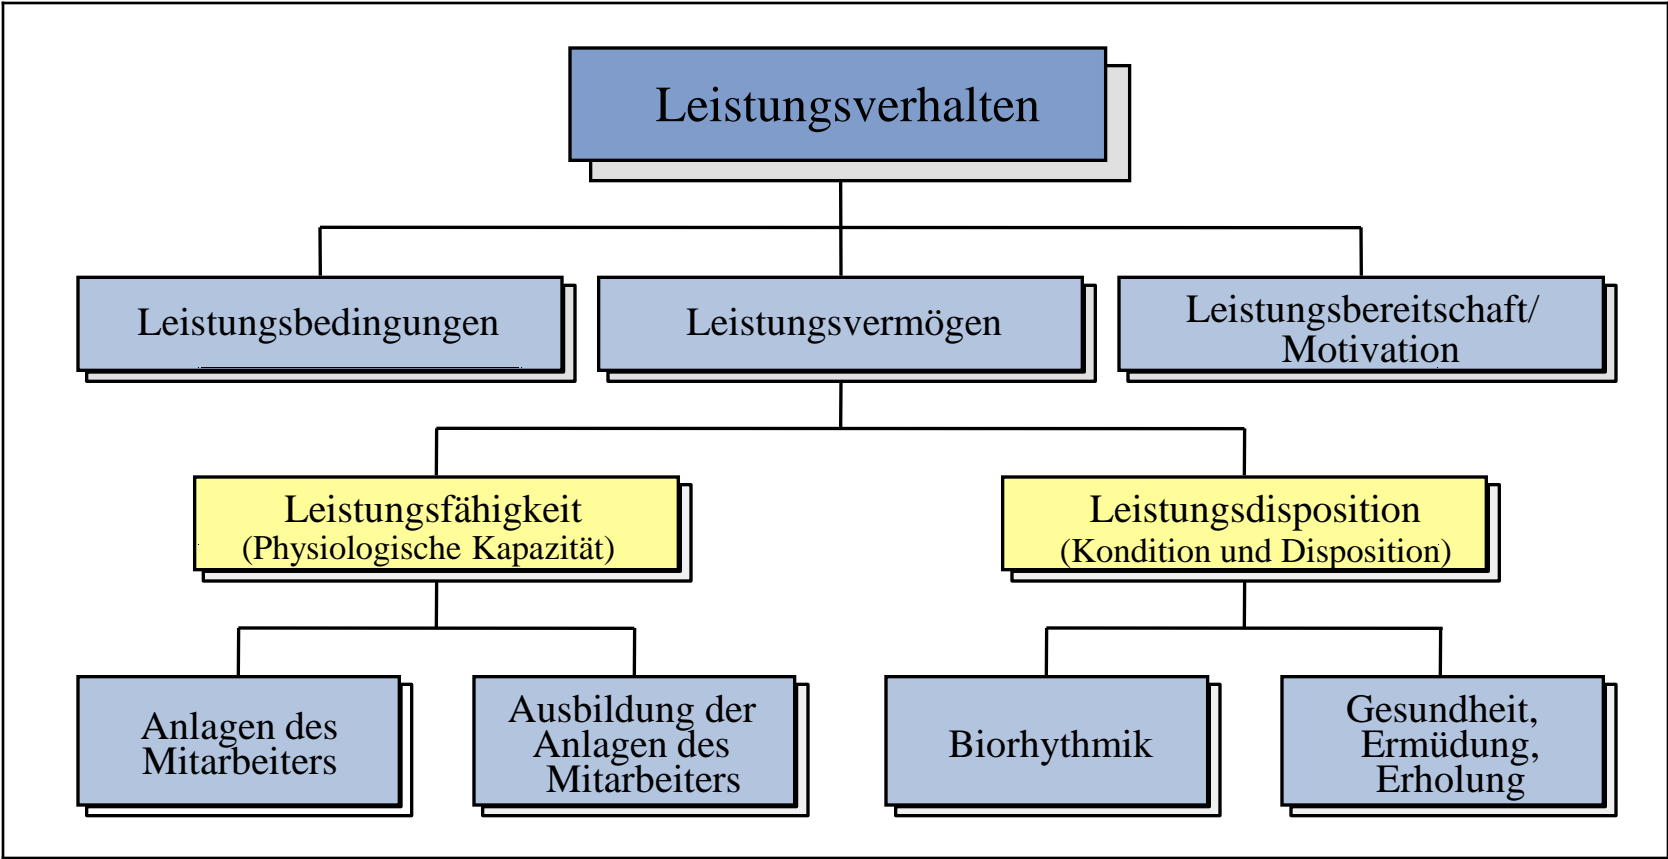

S. 203 Abb. 53  
(in Anlehnung an: REFA: Methodenlehre der Betriebsorganisation, Datenermittlung, München 1997, S. 125 ff)

## Erweitertes Belastungs-Beanspruchungskonzept

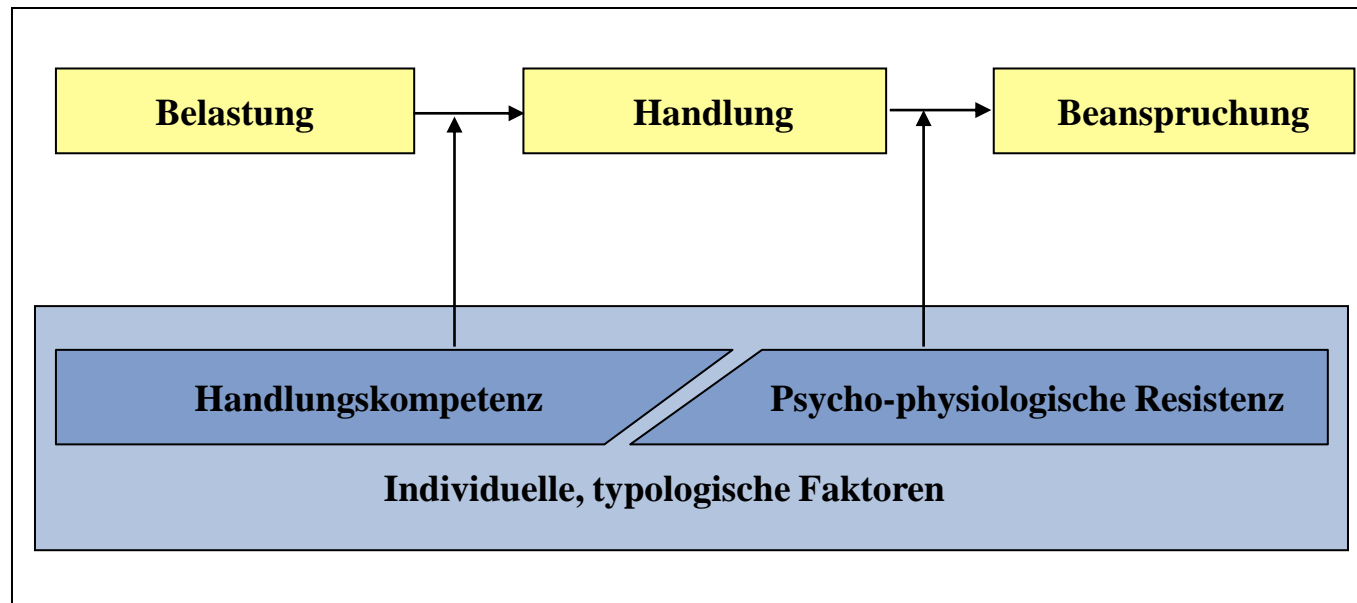

## Ergonomische Bandbreite

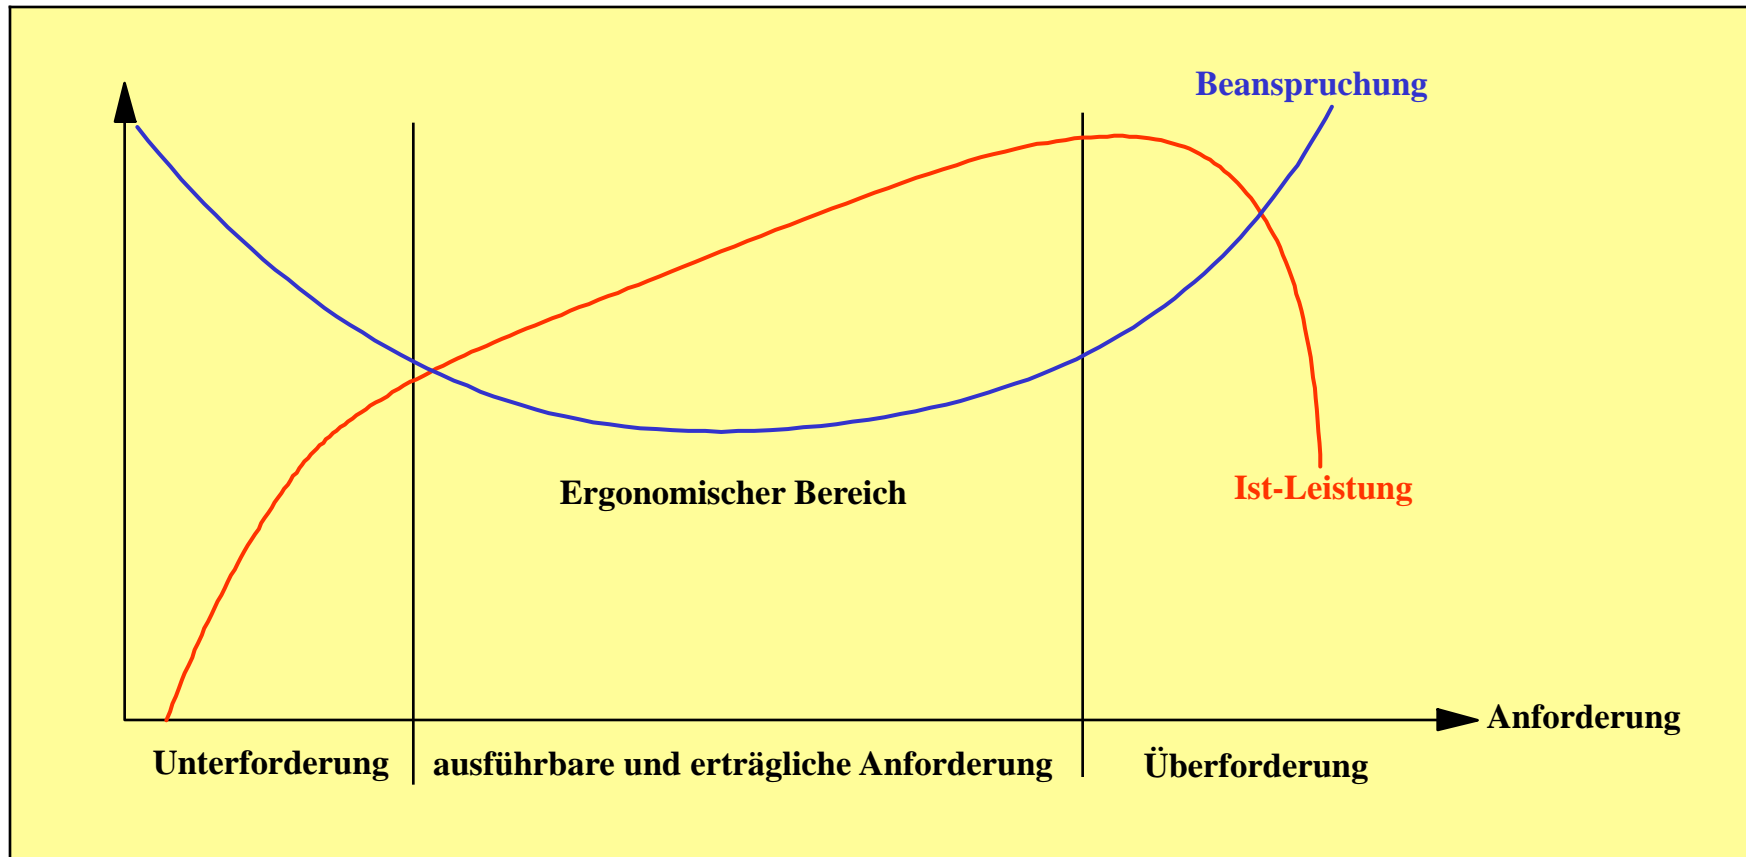

S. 206 Abb. 55  
(in Anlehnung an Rohmert, W.: Ergonomie, was ist das?, Köln 1976, S. 15)

Jung, Hans: Personalwirtschaft, 9. Aufl., München 2010

© Oldenbourg Wissenschaftsverlag

## Erholungsfunktion bei hoher körperlicher Belastung

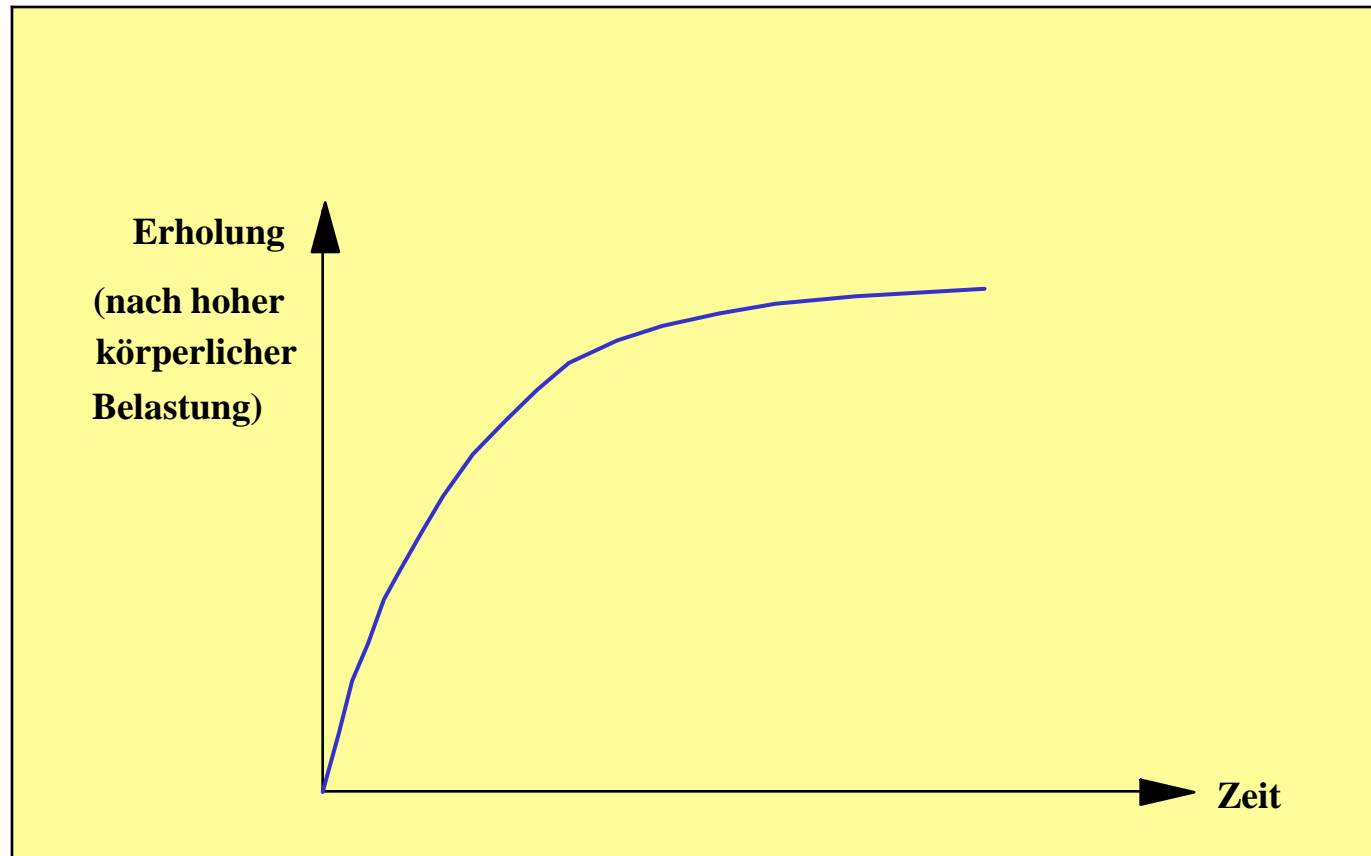

S. 206 Abb. 56

Jung, Hans: Personalwirtschaft, 9. Aufl., München 2010

© Oldenbourg Wissenschaftsverlag

## Biologischer Leistungsrhythmus

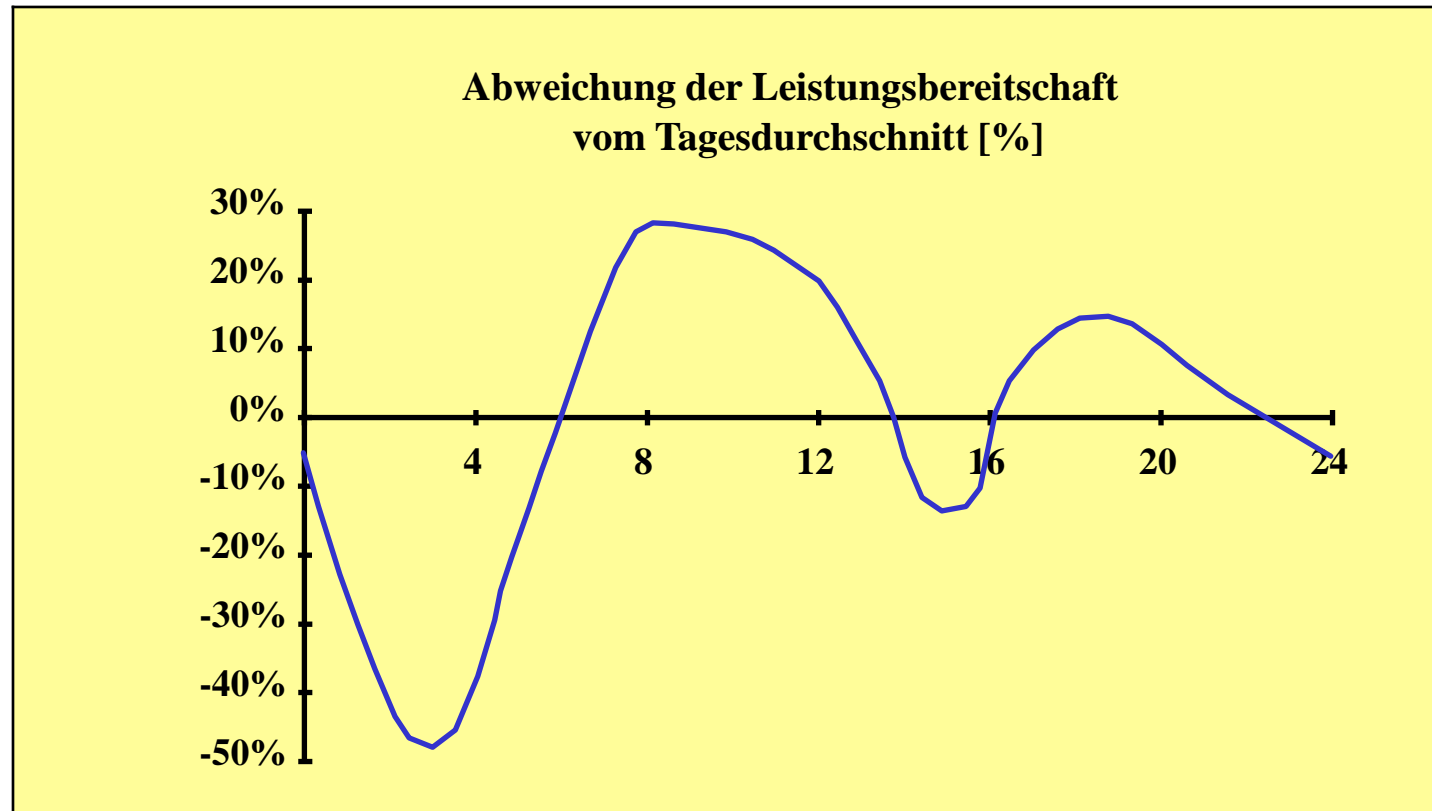

S. 207 Abb. 57  
(in Anlehnung an: Graf, O.: Arbeitsphysiologie, Wiesbaden 1960, S. 16)

Jung, Hans: Personalwirtschaft, 9. Aufl., München 2010

© Oldenbourg Wissenschaftsverlag

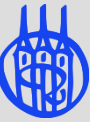

## Aufgaben und methodische Konzepte der Ergonomie

| Aufgaben    | Theorie-Bezug                                                             |
|-------------|---------------------------------------------------------------------------|
| Analysieren | Arbeitssystem                                                             |
| Messen      | Belastungs-Beanspruchung                                                  |
| Beurteilen  | Bewertung: Ausführbarkeit, Erträglichkeit, Zumutbarkeit,<br>Zufriedenheit |
| Gestalten   | Harmonisieren von Humanität und Wirtschaftlichkeit                        |

## Disziplin der Arbeitsplatzgestaltung

| Disziplin             | Untersuchungsbereiche                                                                                                                                                                    | Gestaltungsschwerpunkte                                                                                                                                                                                                                                                         |
|-----------------------|------------------------------------------------------------------------------------------------------------------------------------------------------------------------------------------|---------------------------------------------------------------------------------------------------------------------------------------------------------------------------------------------------------------------------------------------------------------------------------|
| <b>Anthropometrie</b> | Lehre von durchschnittlichen menschlichen Körpermaßen und Bewegungsbereichen.                                                                                                            | Grundlage für die maßliche Gestaltung von Arbeitsplätzen                                                                                                                                                                                                                        |
| <b>Physiologie</b>    | Untersuchungsbereich ist die Beanspruchung des menschlichen Körpers durch körperliche und geistige Belastungen sowie die damit verbundene Ermüdung unter bestimmten Umgebungseinflüssen. | Wahl der Arbeitsform und Pausenform unter Berücksichtigung der Arbeitsschwere, -dauer und -intensität und der Arbeitsumgebung (Staub, Klima, Schall, Beleuchtung).                                                                                                              |
| <b>Psychologie</b>    | Die Erforschung der Wirkung von Umwelteinflüssen und der Aufgabengestaltung auf die Leistungsbereitschaft des Mitarbeiters steht im Mittelpunkt.                                         | Förderung der Kooperation und Kommunikation, Job enlargement, Job enrichment, Job rotation, Wahl von Farben, Musik, Einrichtung.                                                                                                                                                |
| <b>Soziologie</b>     | Lehre der Veränderung und Entwicklung der Gesellschaft; Prägung des Denkens, Verhaltens, Handelns und Bewusstseins durch die Gesellschaft.                                               | Grundlage für die erfolgreiche Zusammenarbeit im Unternehmen, Ursachenfindung sozialer Konflikte                                                                                                                                                                                |
| <b>Technologie</b>    | Gestaltung der Arbeitsinhalte im Hinblick auf die größtmögliche Wirtschaftlichkeit.                                                                                                      | Technologische Form des Arbeitsplatzes, ablauforganisatorische Gestaltung des Arbeitsumfeldes, Art u. Umfang der informatorischen Unterstützung am Arbeitsplatz (akustisch, visuell, tastbar).                                                                                  |
| <b>Sicherheit</b>     | Sicherheitstechnische Maßnahmen, die dem Schutz des Menschen bei der Arbeit dienen.                                                                                                      | Sicherheitsgerechte Konstruktion sämtlicher Bauteile am Arbeitsplatz und im Arbeitsumfeld wie Abmessungen, eingesetzte Werk-, Betriebs- und Hilfsstoffe, elektrische Schaltungen, bewegliche, scharfe oder spitze Teile, Oberflächen, Kennzeichnungen, Schutzeinrichtungen etc. |

S. 208 Abb. 59



Körpermaße für Frauen und Männer

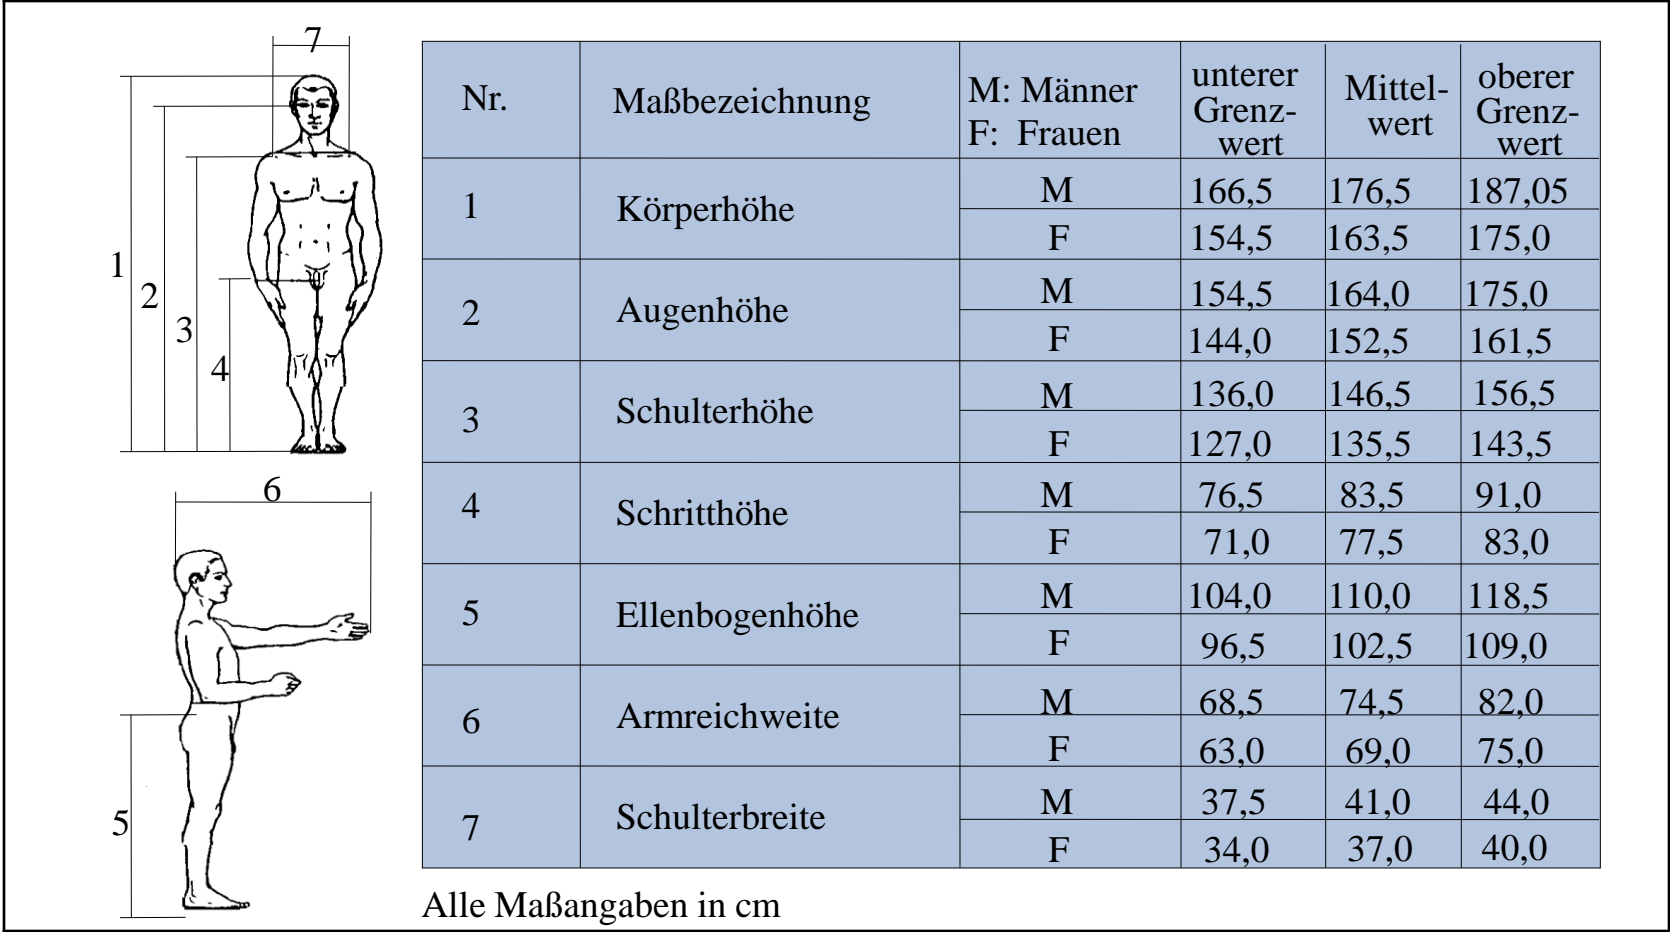

S. 209 Abb. 60

(Körpermaße für unbedeckte Menschen in stehender Körperhaltung, Altersgruppe 26 - 40 Jahre (Auszug aus DIN 33 402, Teil 2, Stand 2009))





## Prinzipien der physiologischen Arbeitsplatzgestaltung

| Prinzip:                                                                                                                                                                                       | Umsetzung:                                                                                                                                                                                                                                                                                                                                                                                                                   |
|------------------------------------------------------------------------------------------------------------------------------------------------------------------------------------------------|------------------------------------------------------------------------------------------------------------------------------------------------------------------------------------------------------------------------------------------------------------------------------------------------------------------------------------------------------------------------------------------------------------------------------|
| <ul style="list-style-type: none"><li>• Prinzip des optimalen Wirkungsgrades</li><li>• Prinzip der minimalen Ermüdung</li><li>• Prinzip der Vermeidung von ungünstigen Arbeitsformen</li></ul> | <ul style="list-style-type: none"><li>• Wahl einer kräftigen, der Arbeitsaufgabe besonders geeigneten Muskelgruppe.</li><li>• Wahl einer optimalen Gelenkstellung, um einen bestmöglichen Krafteinsatz zu erreichen.</li><li>• Wahl einer günstigen Arbeitsgeschwindigkeit mit harmonischen, energiesparenden Bewegungsvorgängen.</li><li>• Einsatz des Körpergewichts</li><li>• Gestaltung der Umgebungseinflüsse</li></ul> |

S. 211 Abb. 61



Formen der Arbeitsinhaltsvergrößerung

| Arbeitsstrukturierung                                       | individuell     | kollektiv            |
|-------------------------------------------------------------|-----------------|----------------------|
| horizontale, quantitative Vergrößerung des Aufgabeninhaltes | Job enlargement | Job rotation         |
| Vertikale, qualitative Vergrößerung des Aufgabeninhaltes    | Job enrichment  | Teilautonome Gruppen |

S. 212 Abb. 62



Gliederung der Arbeitszeit des Menschen

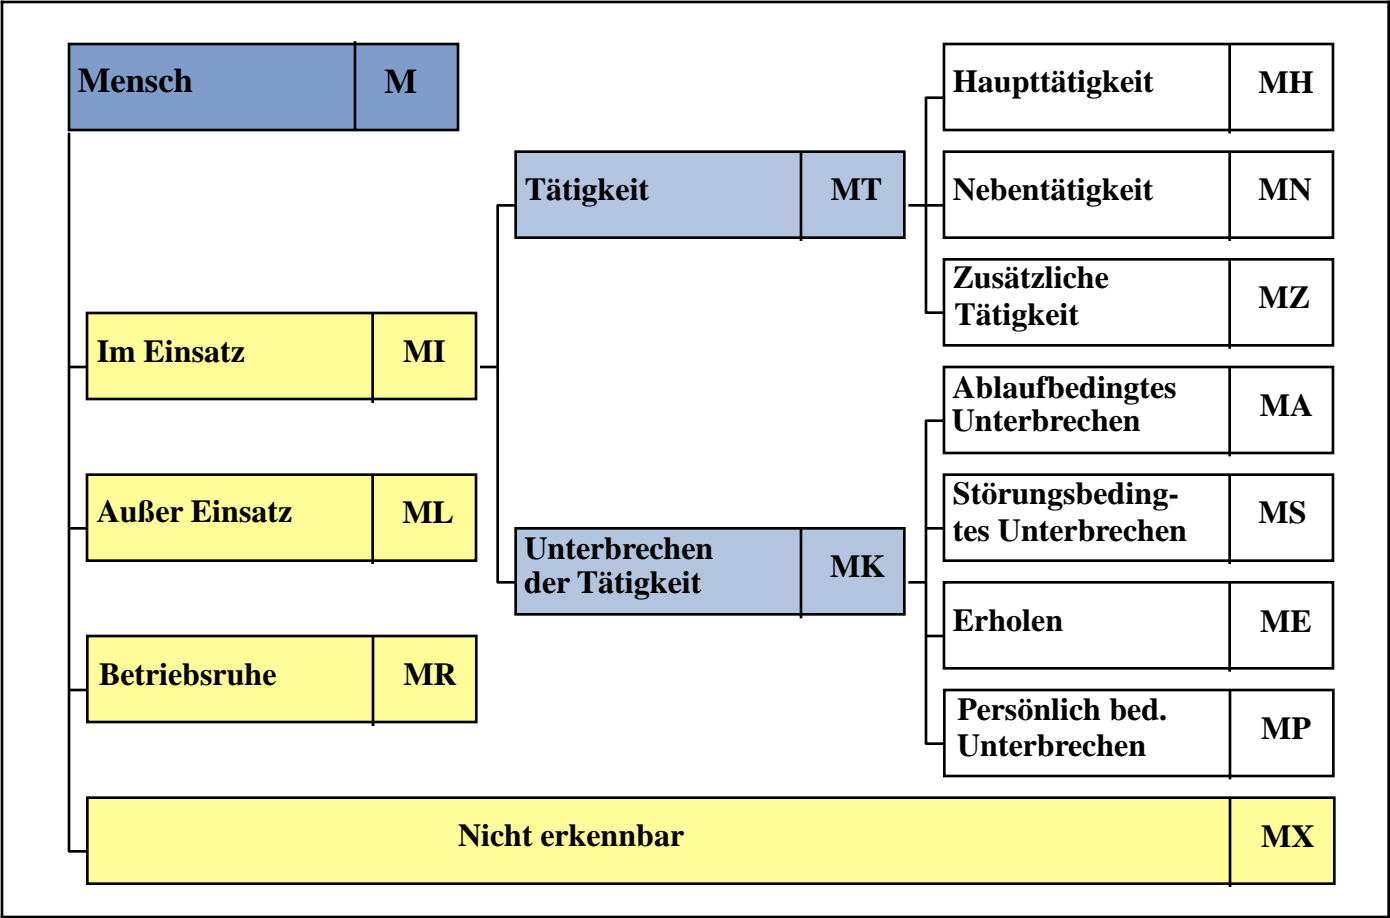

S. 215 Abb. 63



Gliederung der Betriebsmittelzeit

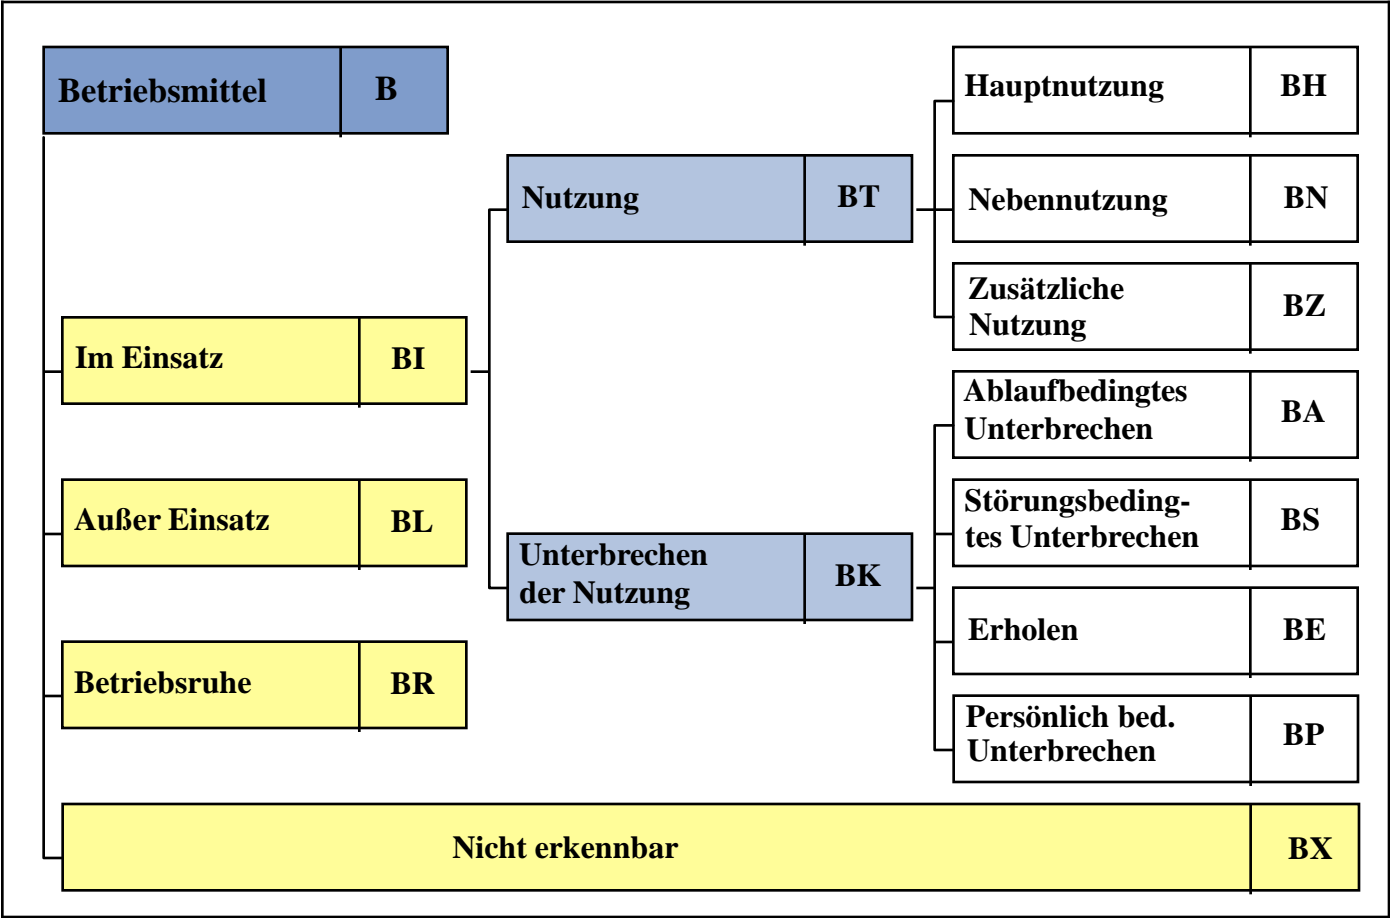

S. 216 Abb. 64  
( REFA: Methodenlehre der Betriebsorganisation, Datenermittlung, München 1997, S. 24 ff)



Gliederung der Werkstoffzeit

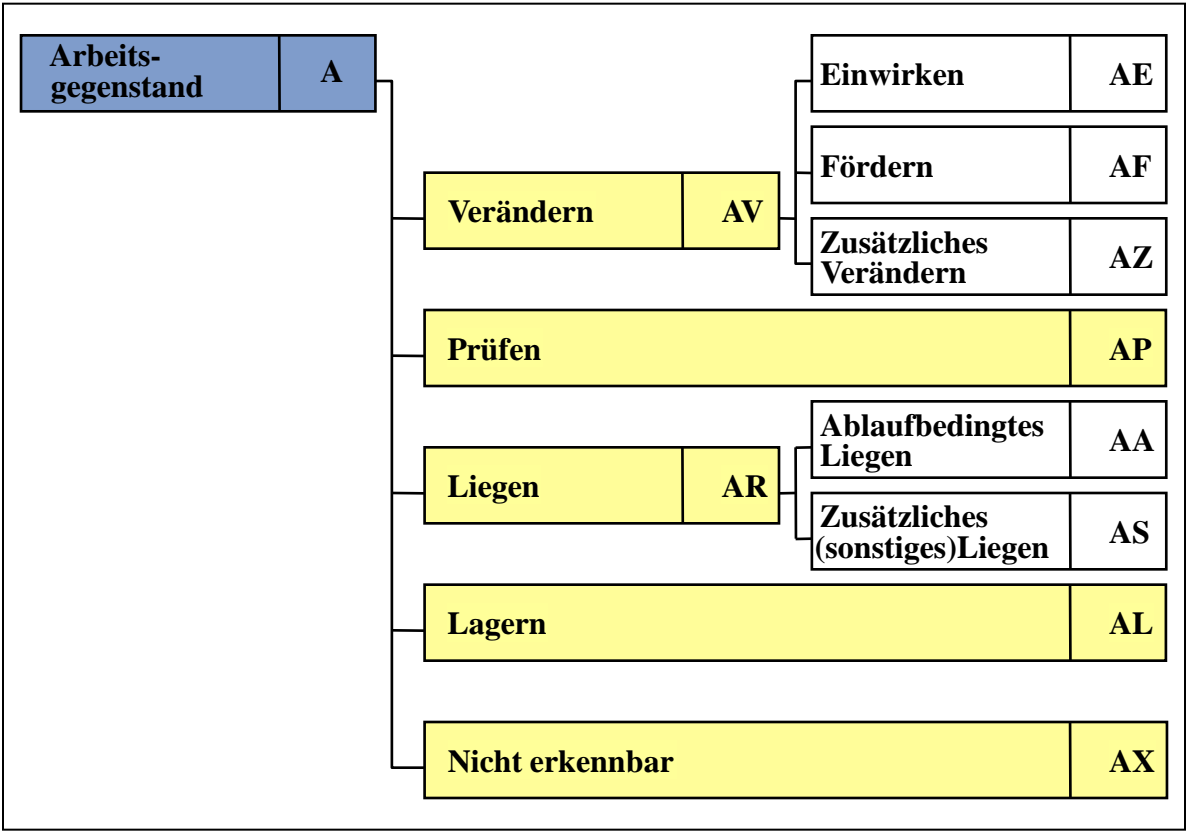

S. 217 Abb. 65  
(REFA: Methodenlehre der Betriebsorganisation, Datenermittlung, München 1997, S. 33 ff).

## Gliederung der Auftragszeit

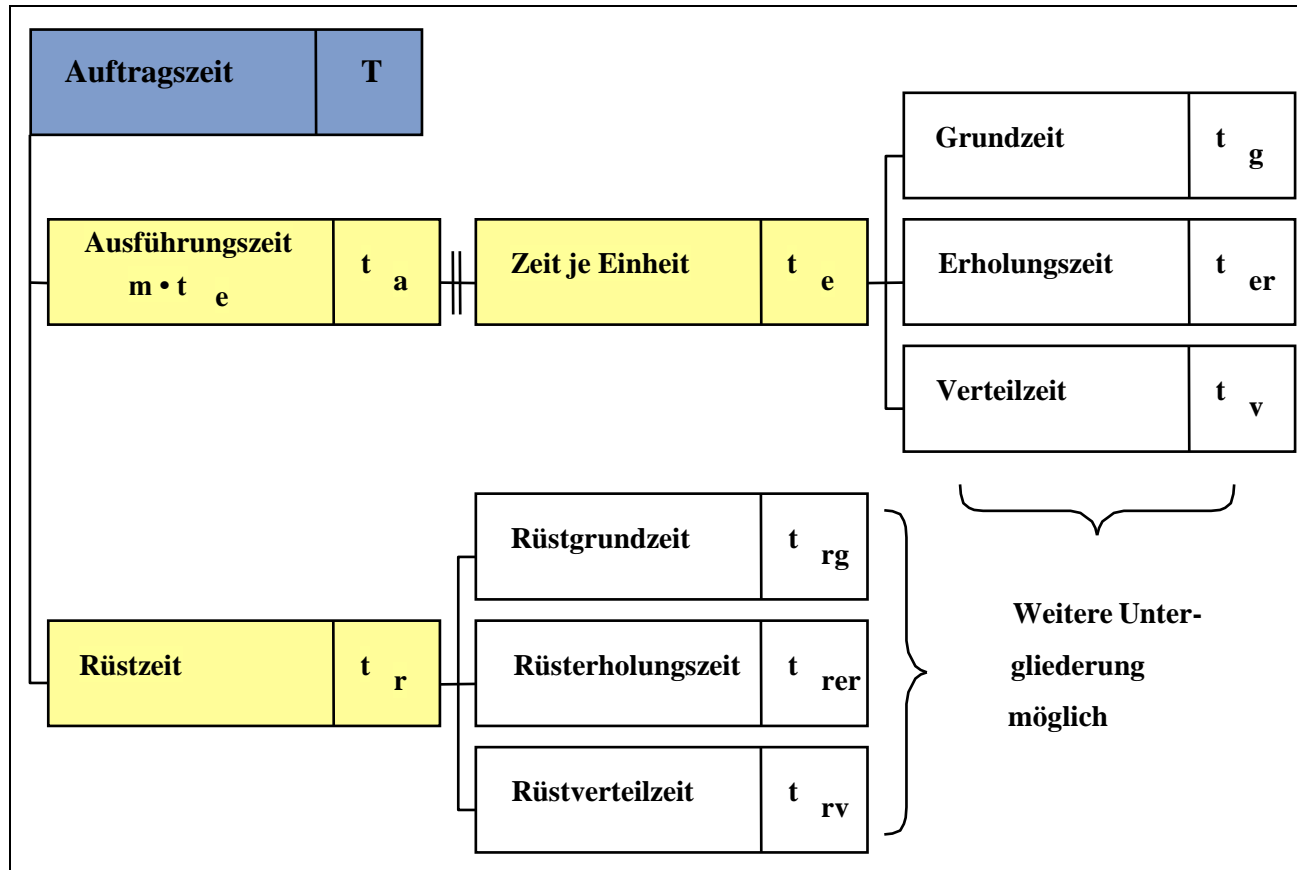

S. 218 Abb. 66  
REFA: Methodenlehre der Betriebsorganisation, Datenermittlung, München 1997, S. 42 ff



Verfahren zur Messung/Bestimmung von Vorgabezeiten

| Bezugsgröße       | Zeitart                              | Messung/Bestimmung                                                    |
|-------------------|--------------------------------------|-----------------------------------------------------------------------|
| Mensch            | Rüstzeit                             | Zeitaufnahme nach REFA<br>Multimomentstudien<br>Schätzungen           |
|                   | Tätigkeitszeit                       | Zeitaufnahme nach REFA<br>Systeme vorbestimmter Zeiten<br>Schätzungen |
|                   | Wartezeit                            | Multimomentstudien                                                    |
|                   | Erholungszeit                        | Methode zur Erholungszeitermittlung                                   |
|                   | Verteilzeit (persönliche, sachliche) | Verteilzeitaufnahme nach REFA<br>Multimomentstudien                   |
| Betriebsmittel    | Prozesszeit                          | Berechnen<br>Betriebsdatenerfassung (BDE)                             |
|                   | Nutzungszeit                         | Zeitaufnahmen<br>Messgeräte<br>Betriebsdatenerfassung (BDE)           |
|                   | Brachzeit                            | Multimomentstudien                                                    |
| Arbeitsgegenstand | Liegezeit                            | Ablaufstudien<br>Multimomentstudien<br>Schätzungen                    |

S. 219 Abb. 67  
(in Anlehnung an: Eissing, G.: Arbeitsorganisation in Klein- und Mittelbetrieben, Köln 1993, S. 153)



## Hierarchisches Arbeitsschutzsystem der BRD

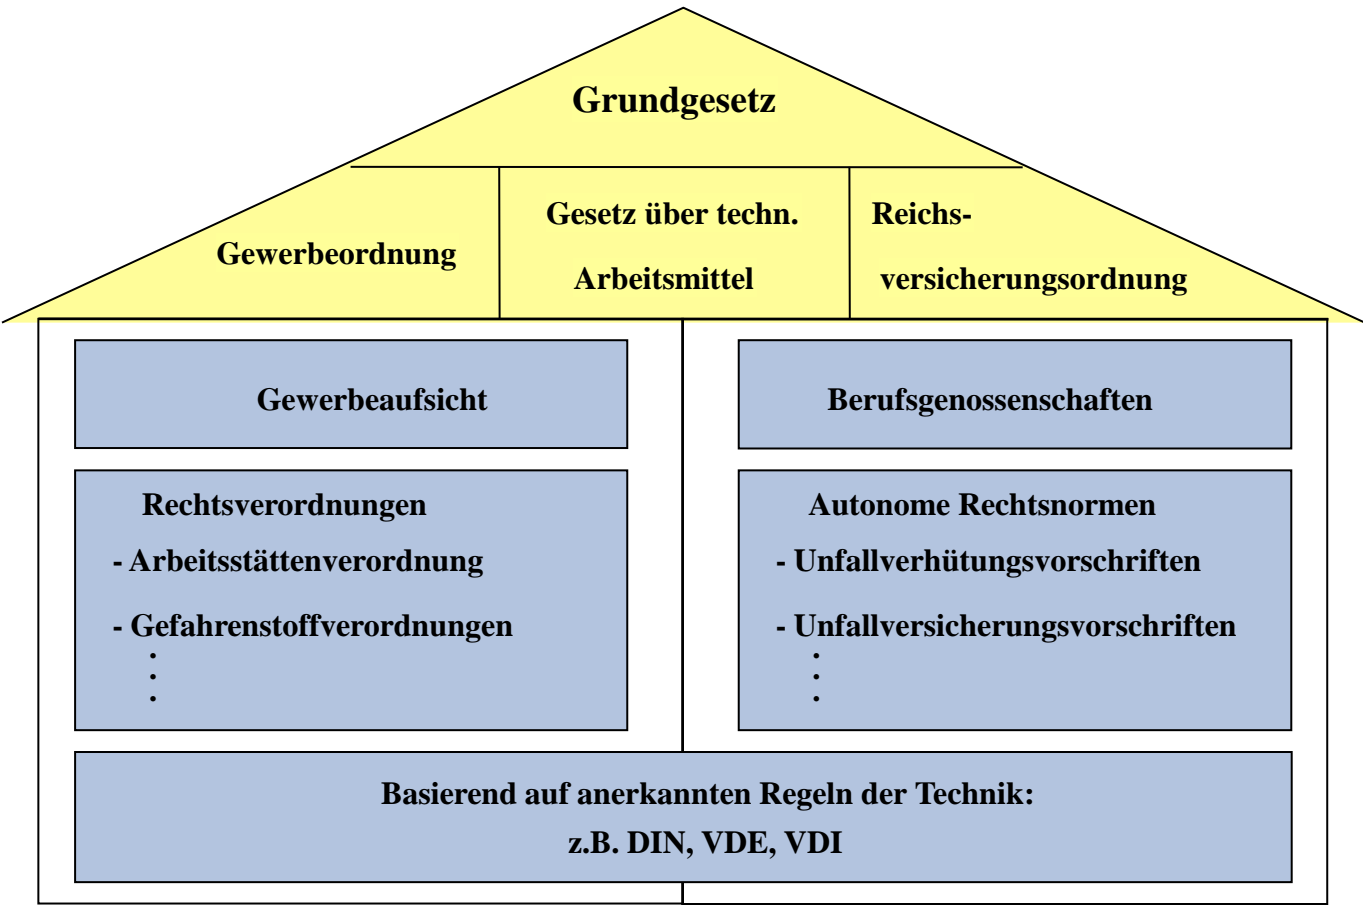

S. 221 Abb. 68





Aufgabengebiete Arbeitsschutz

| Technischer Arbeitsschutz                   | Rechtlicher Rahmen                                                                               |
|---------------------------------------------|--------------------------------------------------------------------------------------------------|
| 1. Arbeitsstätten und Betriebshygiene       | Arbeitsstättenverordnung, Arbeitssicherheitsgesetz, Unfallverhütungsvorschriften, Gewerbeordnung |
| 2. Arbeitsschutzorganisation im Betrieb     | Gesetz über Betriebsärzte, Sicherheitsingenieure und Sicherheitsfachkräfte bzw. -beauftragte     |
| 3. Maschinen, Geräte und technische Anlagen | Gerätesicherheitsgesetz                                                                          |
| 4. Gefahrenstoffe                           | Gefahrenstoffverordnung                                                                          |

  

| Sozialer Arbeitsschutz               | Rechtlicher Rahmen                                               |
|--------------------------------------|------------------------------------------------------------------|
| 5. Arbeitszeitregelungen             | Arbeitszeitgesetz                                                |
| 6. Schutz bestimmter Personengruppen | Betriebsverfassungsgesetz, Jugendarbeits- und Mutterschutzgesetz |

S. 221 Abb. 69  
(in Anlehnung an: Bundesministerium für Arbeit und Sozialordnung (Hrsg.): Soziale Sicherheit, Bonn 1994. und Kittner, M./Pieper, R.: Arbeitsschutzgesetz Basiskommentar mit Betriebssicherheitsverordnung, 3. Aufl., Frankfurt am Main 2003, S. 22 ff)

## Fertigungsinsel und Bereiche

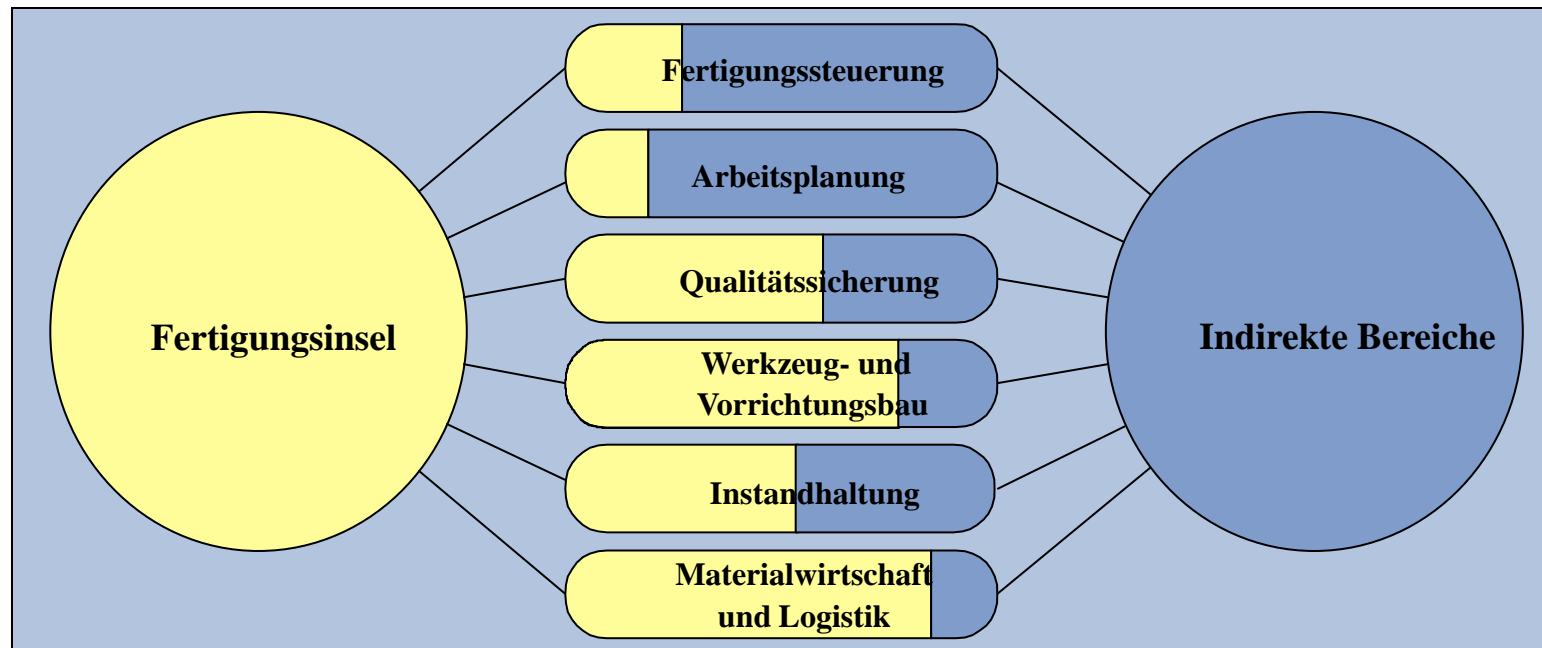

S. 226 Abb. 70  
(in Anlehnung an: Eissing, G.: Arbeitsorganisation in Klein- und Mittelbetrieben, Köln 1993, S. 323)

## Kurzfristige Personaleinsatzmaßnahmen

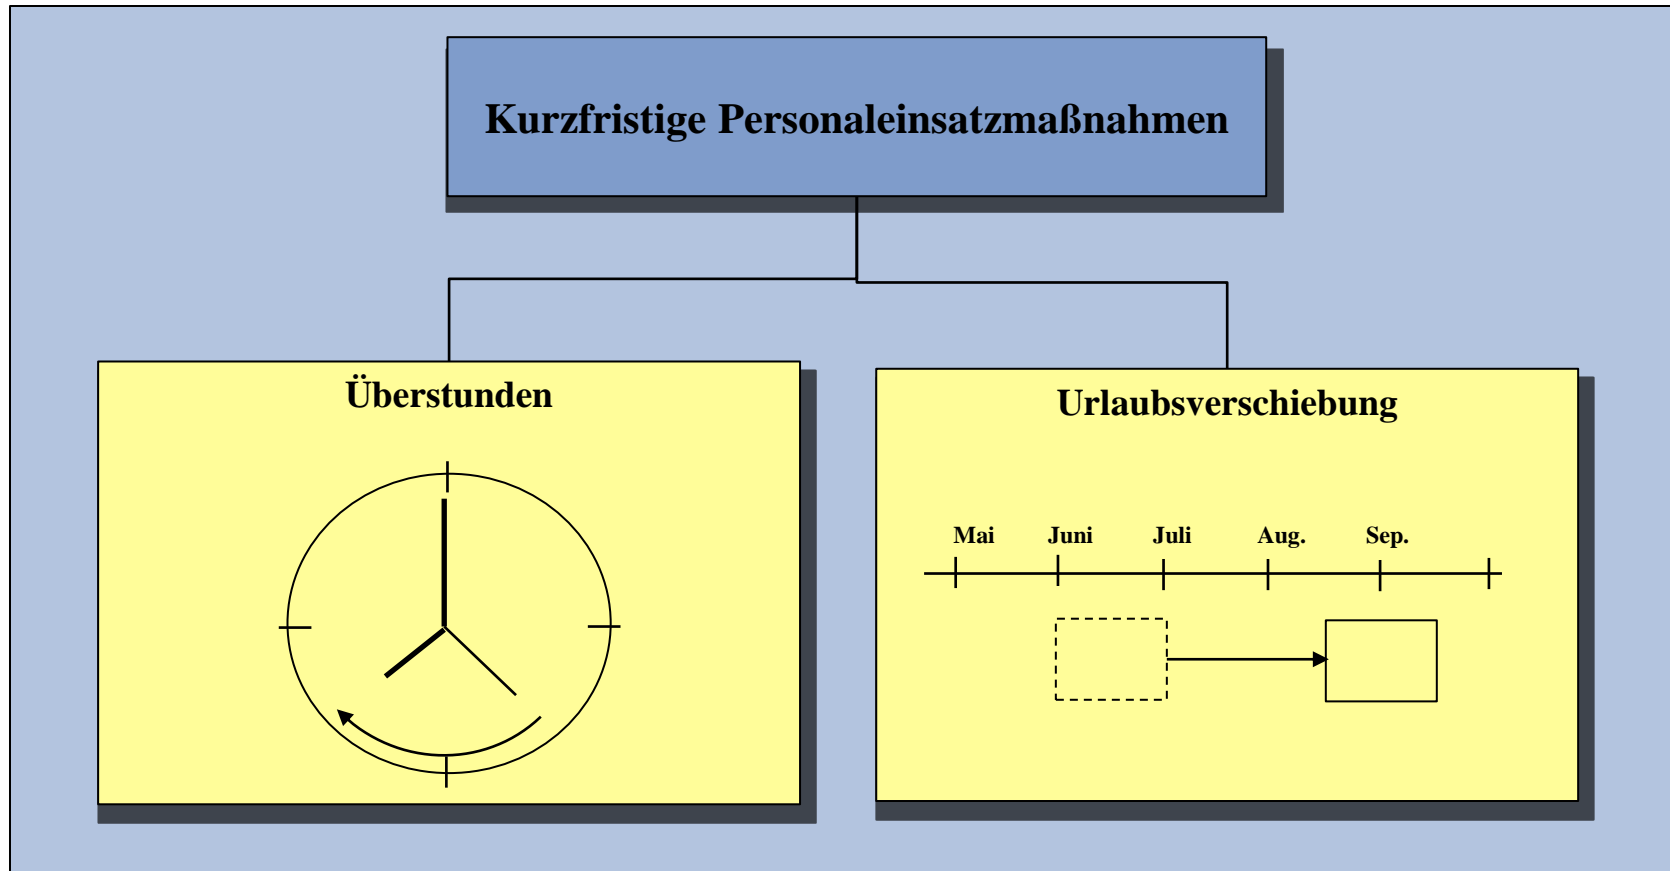

S. 228 Abb. 71

Jung, Hans: Personalwirtschaft, 9. Aufl., München 2010

© Oldenbourg Wissenschaftsverlag



Gleitzeit

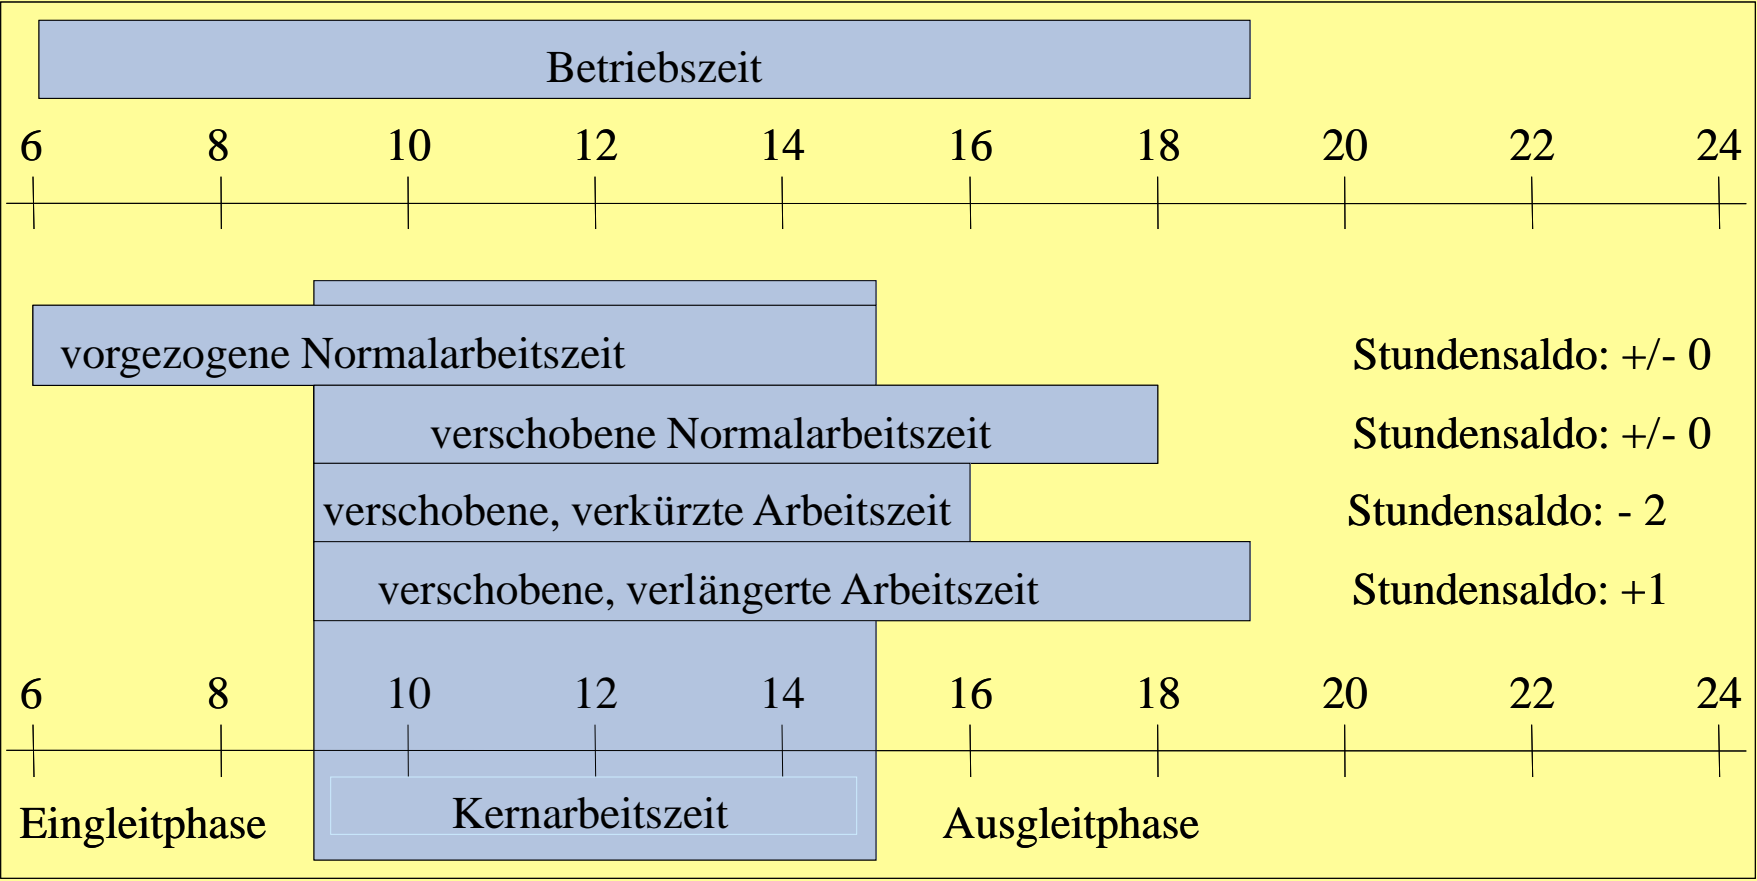

S. 230 Abb. 72



Versetzte/gestaffelte Arbeit

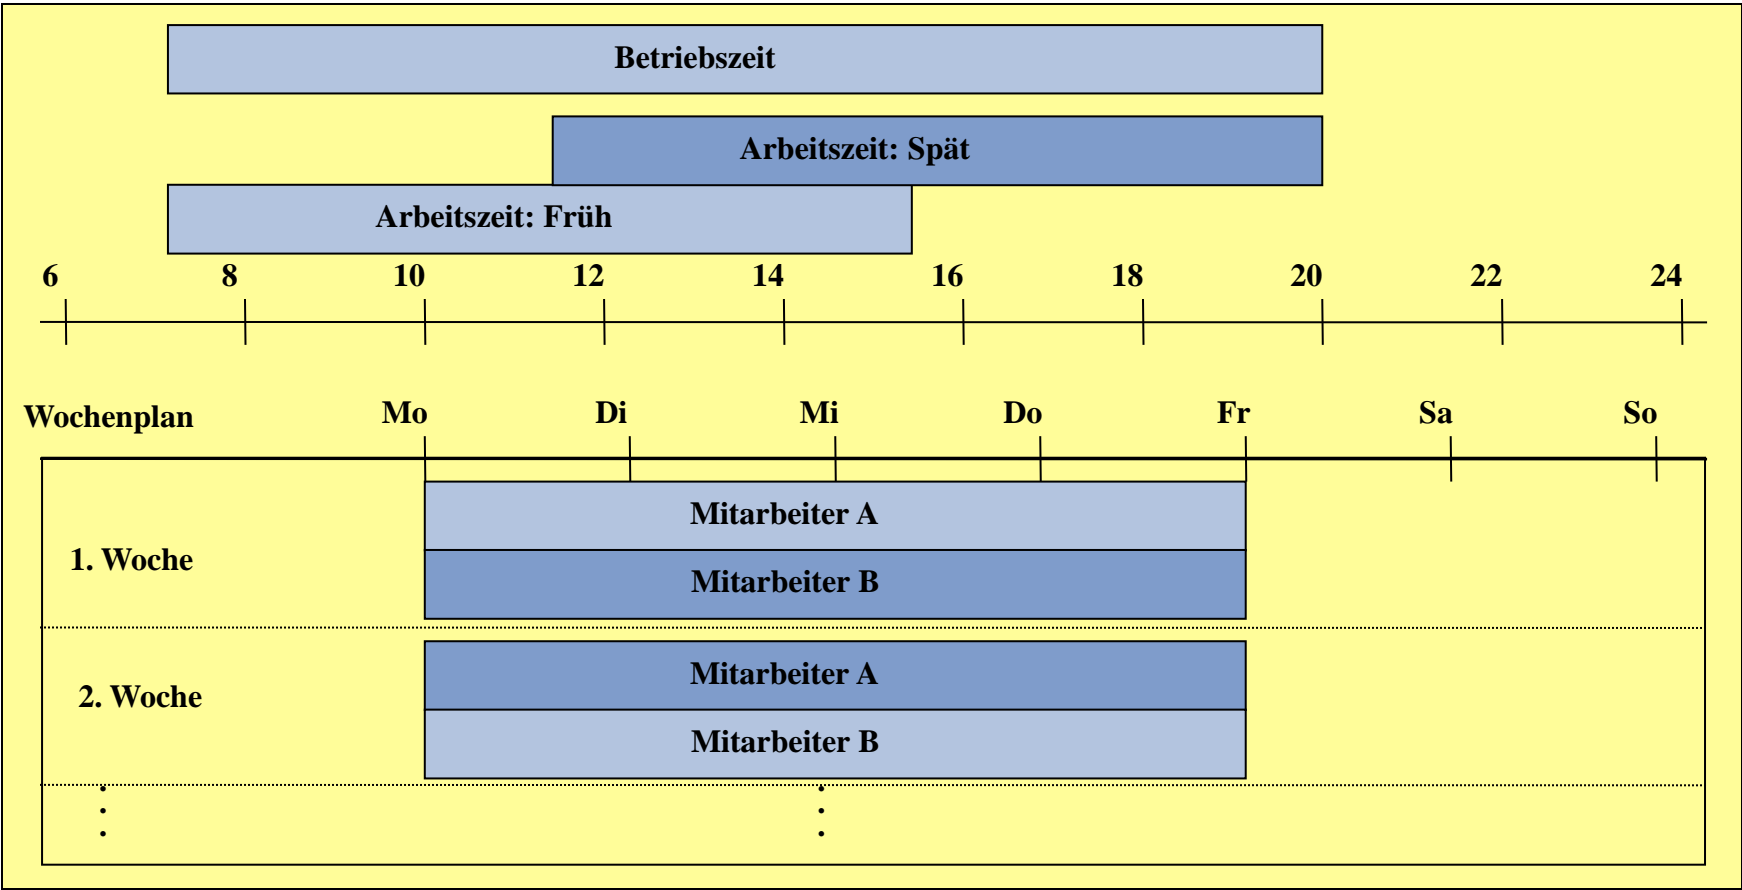

S. 230 Abb. 73

## Gleitzeit

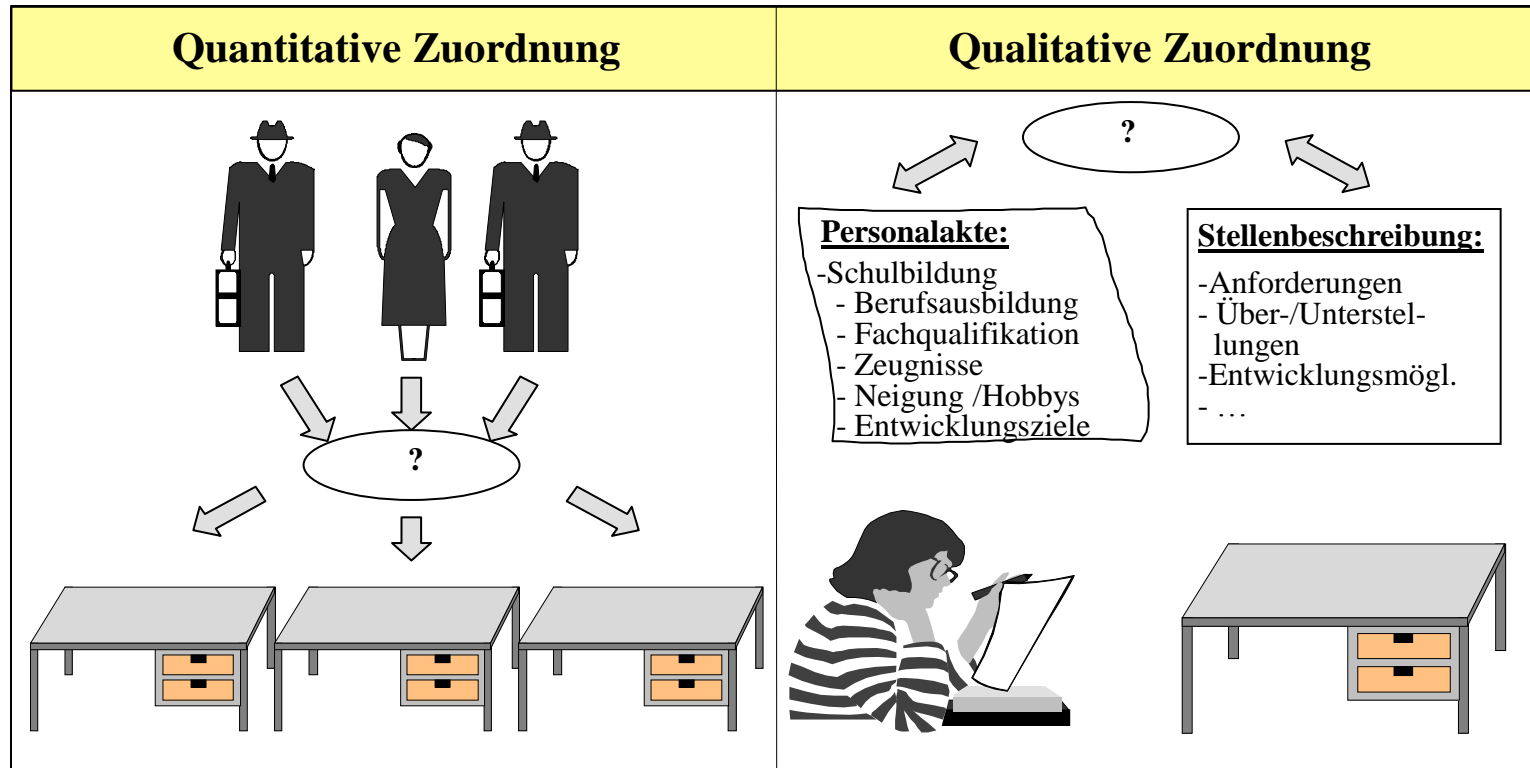

S. 232 Abb. 74

## Flussschema der Personalzuordnung

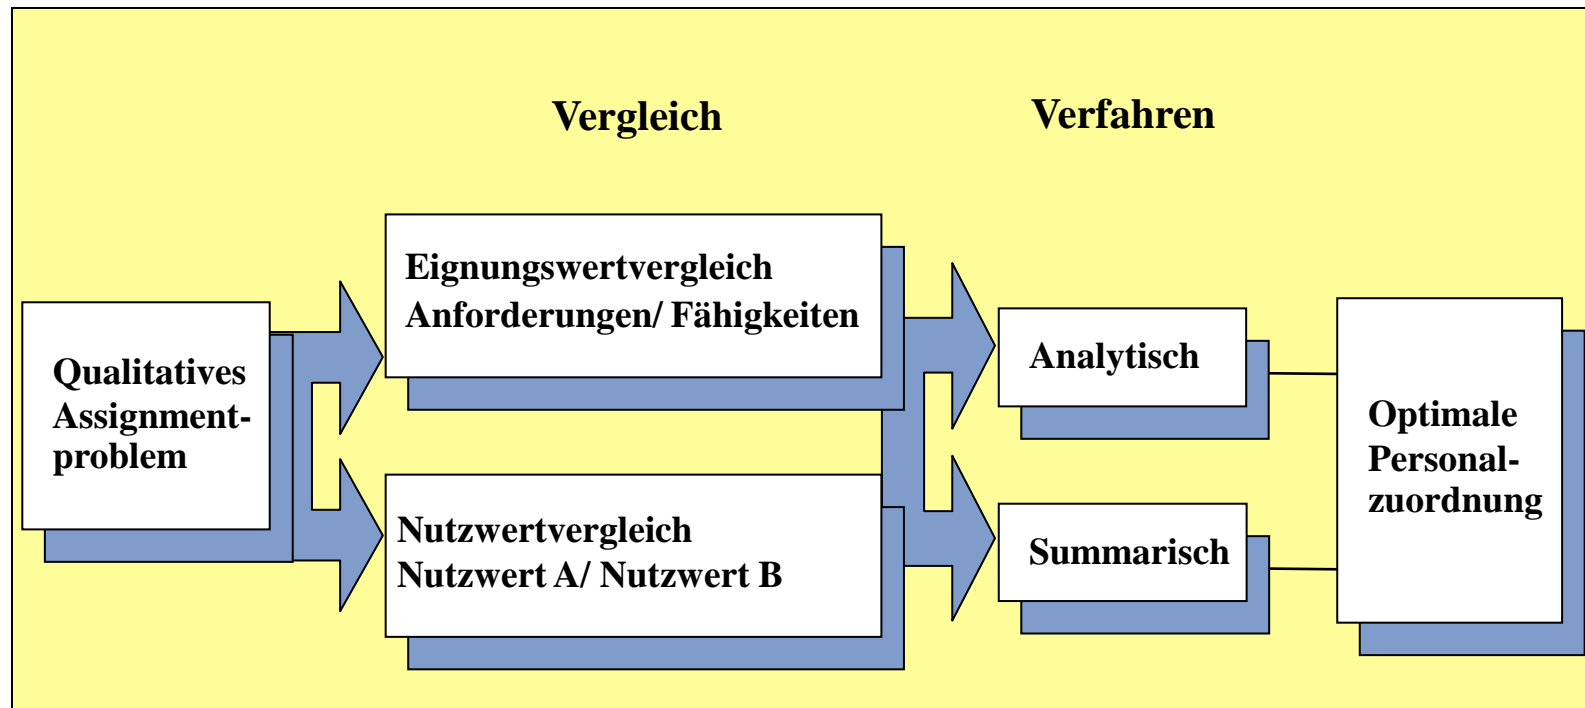

S. 236 Abb. 75

Jung, Hans: Personalwirtschaft, 9. Aufl., München 2010

© Oldenbourg Wissenschaftsverlag



## Gründe für eine Neu- oder Revisionszuordnung

| Tatbestand                                                                                                                                                                                                                                                                                                                             | Zuordnungsfall     |
|----------------------------------------------------------------------------------------------------------------------------------------------------------------------------------------------------------------------------------------------------------------------------------------------------------------------------------------|--------------------|
| <ul style="list-style-type: none"><li>• Stellenneubildung und die dazugehörige interne oder externe Stellenbesetzung</li><li>• Abteilungsneubildung und die i.d.R. interne und externe Stellenbesetzung</li></ul>                                                                                                                      | Neuzuordnung       |
| <ul style="list-style-type: none"><li>• Änderung der Unternehmensstrukturierung (z.B. von einer Linienorganisation zur Matrixorganisation)</li><li>• Technologischer Stellenanforderungswandel</li><li>• Alters- oder gesundheitsbedingter Leistungswandel des Stelleninhabers</li><li>• Unzufriedenheit des Stelleninhabers</li></ul> | Revisionszuordnung |

S. 236 Abb. 76





Unternehmensverteilung von Eignungsgraden

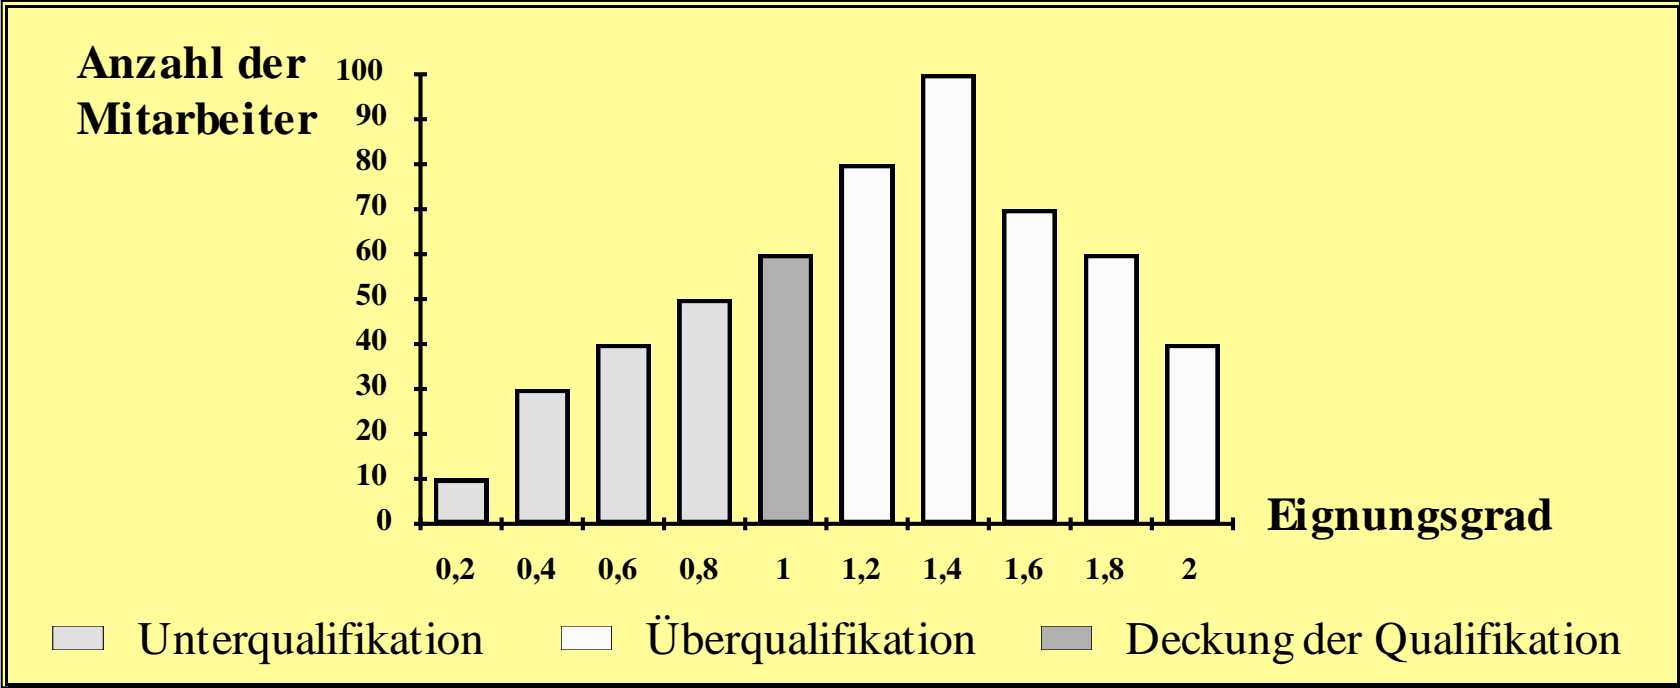

S. 237 Abb. 77

# Beispiel einer qualitativen summarischen Zuordnung nach dem Eignungsgradverfahren

| Soll-Personalbestand  | I |   |   | II |   | III | IV | V | VI |   | VII |   | VIII | Bezeichnung der Arbeitsplätze |
|-----------------------|---|---|---|----|---|-----|----|---|----|---|-----|---|------|-------------------------------|
|                       | 1 | 1 | 1 | 1  | 1 | 1   | 1  | 1 | 1  | 1 | 1   | 1 | 1    |                               |
| Name des Mitarbeiters |   |   |   |    |   |     |    |   |    |   |     |   |      |                               |
| Preuß, W.             | + | + | + | =  | = | -   | -  | - | -  | - | -   | - | -    | I Kranffahrer                 |
| Blanck, K.            | + | + | + | =  | = | =   | =  | = | =  | = | =   | = | =    | II Anhänger                   |
| Loehner, E.           | + | + | + | =  | = | o   | o  | o | o  | o | o   | o | o    | III E-Karrenffahrer           |
| Funke, K.H.           | = | = | = | +  | + | +   | -  | - | -  | - | -   | - | -    | IV Bohrer                     |
| Eberle, P.            | = | = | = | +  | + | =   | +  | + | +  | + | +   | + | +    | V Richter                     |
| Lux, W                | - | - | - | =  | = | +   | o  | o | o  | o | o   | o | o    | VI Abstecher große Bank       |
| Conrad, B.            | - | - | - | =  | = | o   | +  | + | =  | = | =   | = | =    | VII Abstecher kleine Bank     |
| Mertens, A.           | o | o | o | -  | - | o   | +  | + | -  | - | -   | - | -    | VIII Säger                    |
| Mutmann, R.           | o | o | o | -  | - | -   | =  | = | +  | + | +   | + | =    | o wenig geeignet              |
| Leder, E.             | = | = | = | +  | + | -   | +  | + | +  | + | +   | + | +    | - nur mit Ein-arbeitungszeit  |
| Schmidt, B.           | - | - | - | -  | - | -   | =  | = | +  | + | +   | + | +    | = gut geeignet                |
| Schaefer, G.          | o | o | o | o  | o | o   | =  | = | +  | + | +   | + | +    | +                             |
| Hellweg, R.           | + | + | + | =  | = | =   | =  | = | -  | - | -   | - | +    | +                             |

Stamm-beschäftigung

S. 238 Abb.78

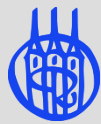

Grafische Darstellung des Profilvergleichs

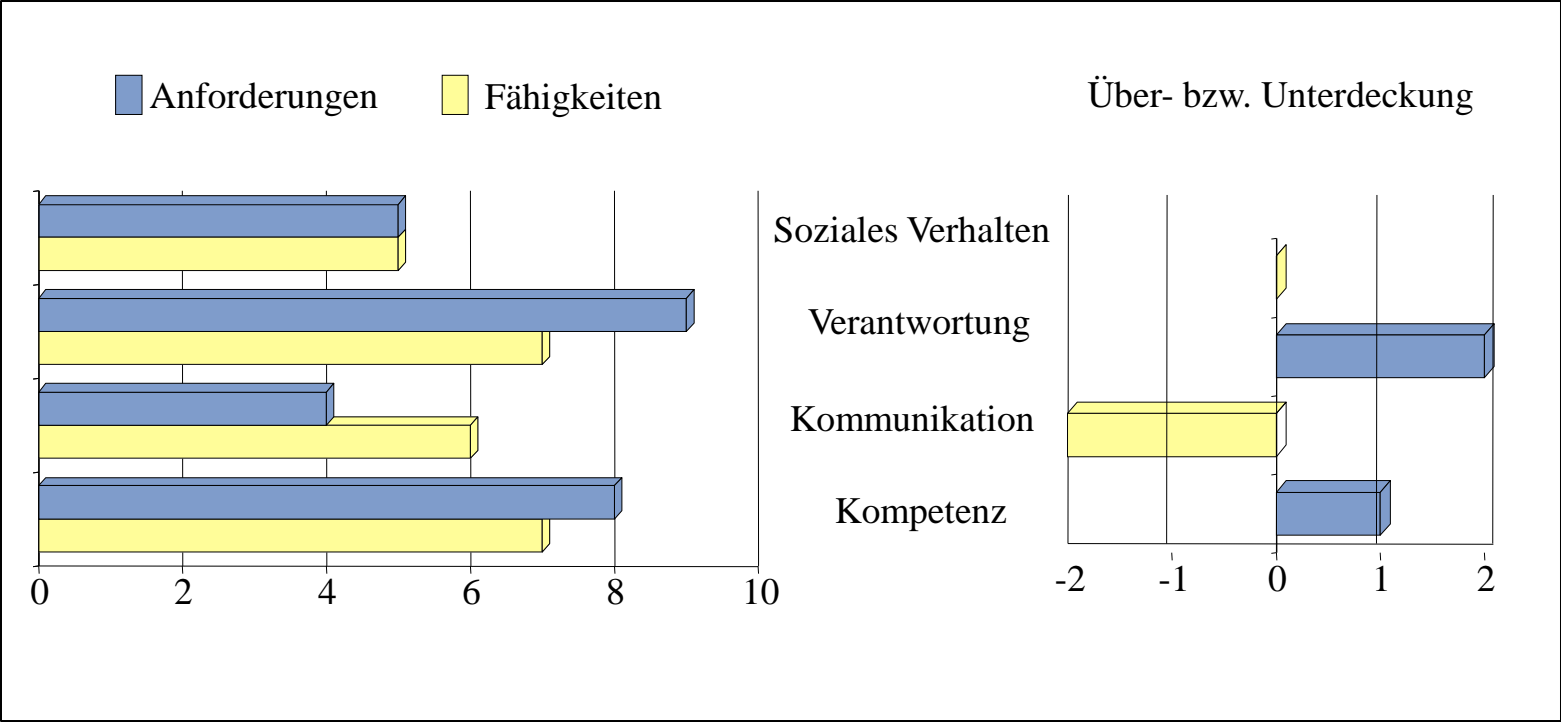

S. 243 Abb. 79

# Die Veränderung des Leistungsvermögens mit zunehmenden Alter

| Mit steigendem Alter                                                                                                |                                                                                                                                                  |                                                                                                                                                                                                                                                                                          |
|---------------------------------------------------------------------------------------------------------------------|--------------------------------------------------------------------------------------------------------------------------------------------------|------------------------------------------------------------------------------------------------------------------------------------------------------------------------------------------------------------------------------------------------------------------------------------------|
| <b>erhöhen</b> sich in der Regel bis zu einem individuellen Maximum                                                 | <b>bleiben</b> in der Regel weitgehend <b>erhalten</b>                                                                                           | <b>verringern</b> sich in der Regel                                                                                                                                                                                                                                                      |
| Körperliche (physische) Eigenschaften und Fähigkeiten                                                               |                                                                                                                                                  |                                                                                                                                                                                                                                                                                          |
| <ul style="list-style-type: none"> <li>• Geübtheit (in Abhängigkeit von der Art und Dauer der Tätigkeit)</li> </ul> | <ul style="list-style-type: none"> <li>• Widerstandsfähigkeit gegen eine physische Dauerbelastung unterhalb der Dauerbelastungsgrenze</li> </ul> | <ul style="list-style-type: none"> <li>• Muskelkraft</li> <li>• Beweglichkeit</li> <li>• Widerstandsfähigkeit gegen eine Kurzzeitbelastung über der Dauerbelastungsgrenze</li> <li>• Fähigkeit zur Anpassung an klimatische Umweltbedingungen</li> <li>• Seh- und Hörvermögen</li> </ul> |

S. 243 Abb. 80A  
 Quelle: Vgl. Kador, F.-J./Diergarten, D.: Unternehmerische Sozialpolitik, 4. Aufl., Köln 1993, S. 304 ff

| Geistige (psychische) Eigenschaften und Fähigkeiten                                                                                                                                                                                                                                                                                                                                                                                                                                                                                                                                                                                                                                       |                                                                                                                                                                                                                                                                                                                                                                                                                   |                                                                                                                                                                                                                                                                                                                                                                    |
|-------------------------------------------------------------------------------------------------------------------------------------------------------------------------------------------------------------------------------------------------------------------------------------------------------------------------------------------------------------------------------------------------------------------------------------------------------------------------------------------------------------------------------------------------------------------------------------------------------------------------------------------------------------------------------------------|-------------------------------------------------------------------------------------------------------------------------------------------------------------------------------------------------------------------------------------------------------------------------------------------------------------------------------------------------------------------------------------------------------------------|--------------------------------------------------------------------------------------------------------------------------------------------------------------------------------------------------------------------------------------------------------------------------------------------------------------------------------------------------------------------|
| <ul style="list-style-type: none"> <li>• Erfahrung</li> <li>• Geübtheit (in Abhängigkeit von der Art und Dauer der Tätigkeit)</li> <li>• Urteilsvermögen (u.a. Treffsicherheit bei Zuordnungs- und Konstruktionsaufgaben)</li> <li>• Gesprächsfähigkeit (Ausdrucksverm., Gewandtheit)</li> <li>• Fähigkeit zum dispositiven Denken, Selbstständigkeit</li> <li>• Genauigkeit bei geringerem Komplexitätsgrad</li> <li>• Fähigkeit zur menschlichen Zusammenarbeit</li> <li>• Verantwortungsbewusstsein/Zuverlässigkeit</li> <li>• Ausgeglichenheit und Beständigkeit</li> <li>• Menschliche Reife</li> <li>• Positive Einstellung zur Arbeit</li> <li>• Sicherheitsbewusstsein</li> </ul> | <ul style="list-style-type: none"> <li>• Allgemeinwissen</li> <li>• Fähigkeit zur Informationsaufnahme und –verarbeitung</li> <li>• Aufmerksamkeit</li> <li>• Konzentrationsfähigkeit</li> <li>• Merkfähigkeit (Langzeitgedächtnis)</li> <li>• Widerstandsfähigkeit gegen eine im Arbeitsprozess übliche psychische Belastung</li> <li>• Lernfähigkeit (unter bestimmten didaktischen Voraussetzungen)</li> </ul> | <ul style="list-style-type: none"> <li>• Geistige Beweglichkeit und Umstellungsfähigkeit</li> <li>• Geschwindigkeit der Informationsaufnahme und -verarbeitung (Reaktionsvermögen) bei komplexer Aufgabenstellung</li> <li>• Widerstandsfähigkeit gegen eine hohe psychische Dauerbelastung</li> <li>• Kurzzeitgedächtnis</li> <li>• Risikobereitschaft</li> </ul> |

S. 243 Abb. 80B  
(in Anlehnung an: Kador, F.-J./Diergarten, D.: Unternehmerische Sozialpolitik, 4. Aufl., Köln 1993, S. 304 ff)

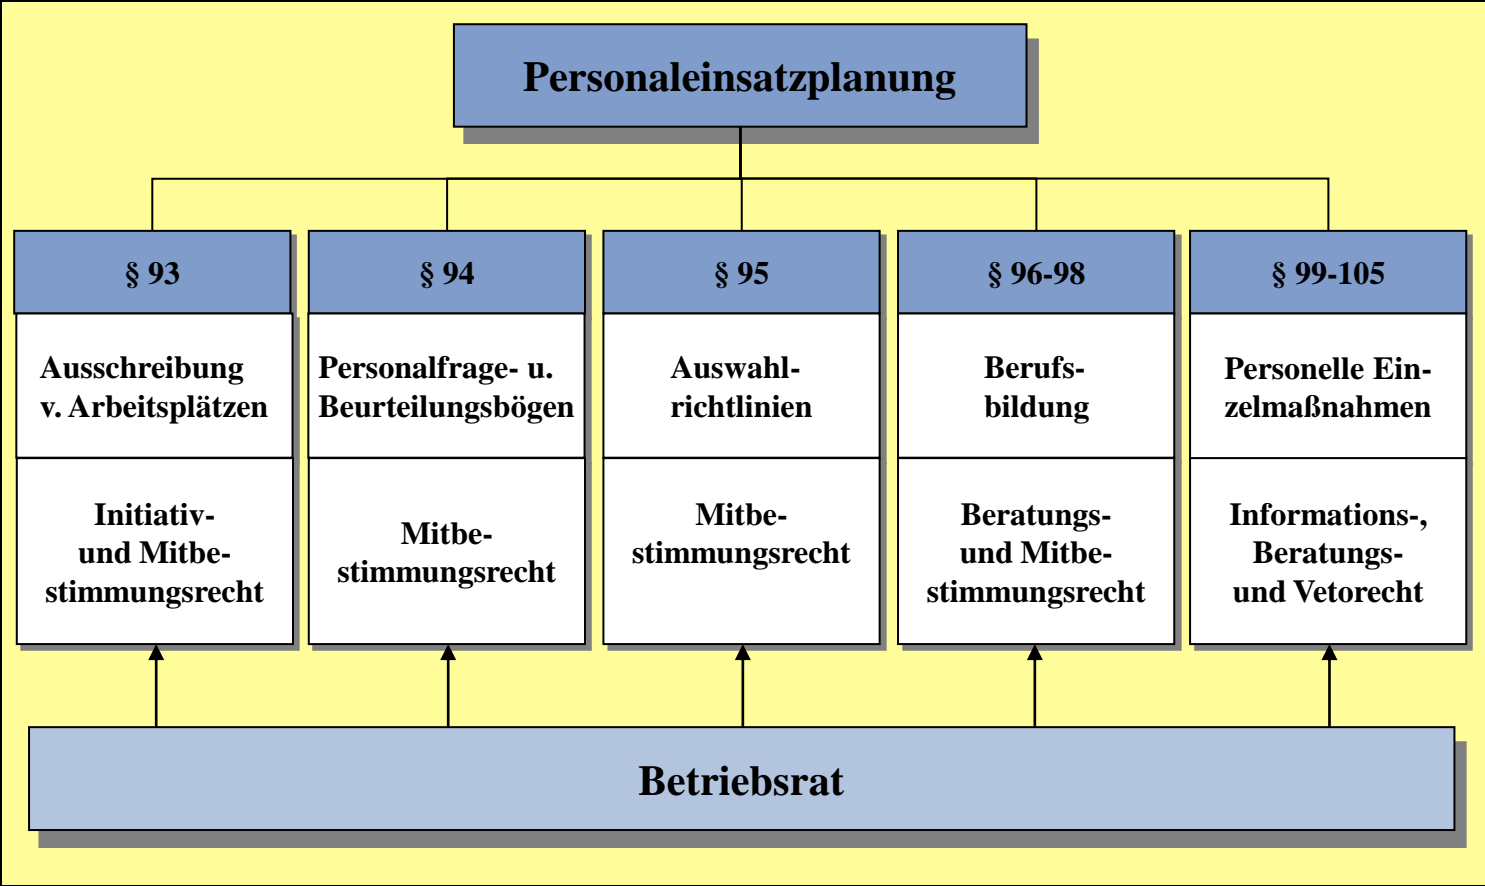

S. 246 Abb. 81

## 4. Personalentwicklung

- 4.1 Ziele und Aufgaben der Personalentwicklung
- 4.2 Planung der Personalentwicklung
- 4.3 Inhalte der Personalentwicklung
- 4.4 Bereiche der Personalentwicklung
- 4.5 Die effektive Gestaltung von Bildungsmaßnahmen

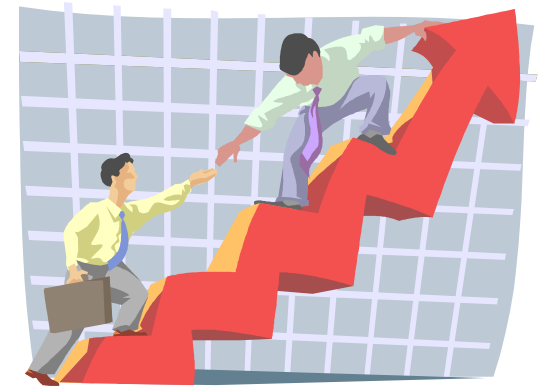

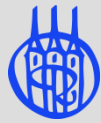

Halbwertszeit des Wissens

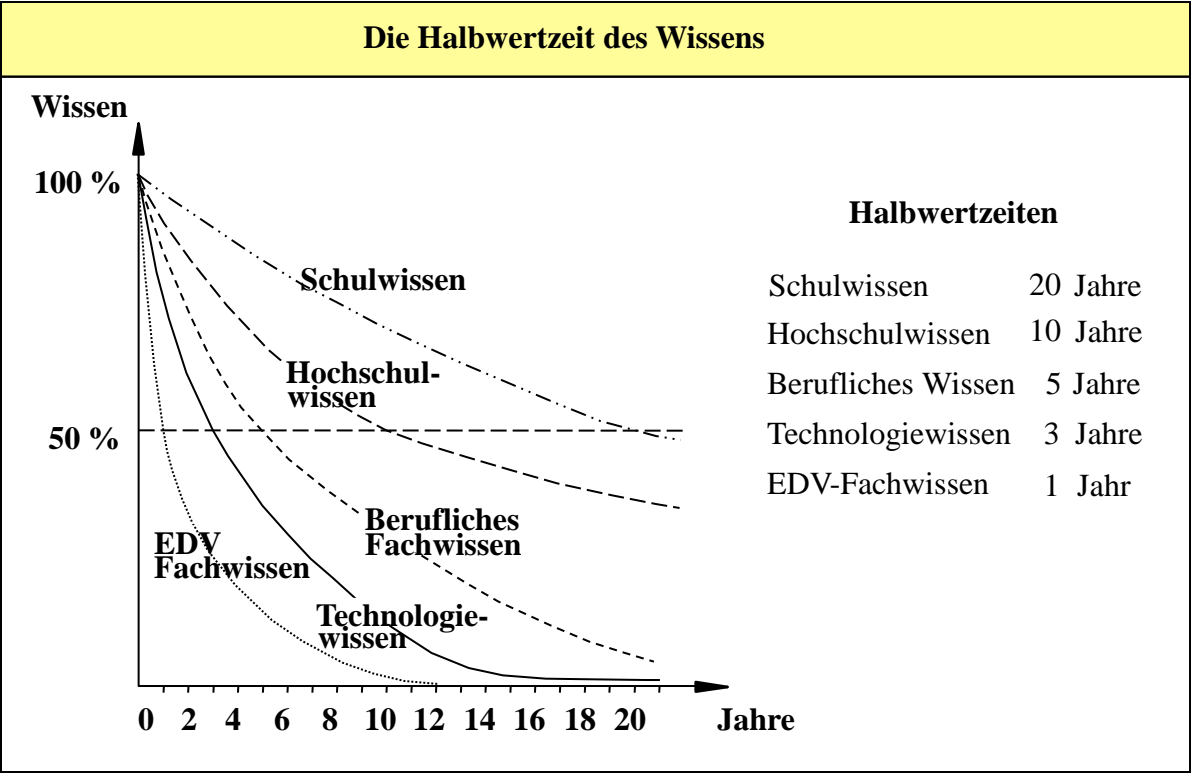

S. 251 Abb. 82  
(in Anlehnung an: Nagel, K.: Weiterbildung als strategischer Erfolgsfaktor. Der Weg zum unternehmerisch denkenden Mitarbeiter, 3. Aufl., Landsberg am Lech 1994, S. 32.)





## Ziele der Personalentwicklung

- Die Personalentwicklung bezieht ihren Auftrag aus dem Interesse des Unternehmens, als **problemlösendes System** in jeder denkbaren Situation funktionstüchtig zu sein.
- Erfolg oder Misserfolg sind fast nie eine Folge der Marktsituation, sondern eine Folge der **inneren Verfassung** und **Reaktionsfähigkeit**.
- Die vordringliche Aufgabe der Personalentwicklung besteht darin, die vorhandenen Fähigkeiten und Neigungen der Mitarbeiter zu erkennen, **zu entwickeln** und sie mit den jeweiligen Erfordernissen des Arbeitsplatzes in Übereinstimmung zu bringen.



## Unternehmensbezogene Ziele:

- Die Mitarbeiter sollen lernen, in neuen Situationen flexibel zu agieren und zu reagieren.
- Die Mitarbeiter sollen mit ihren fachlichen und persönlichen Fähigkeiten aufgabengerecht eingesetzt werden.
- Die Eigenverantwortlichkeit der Mitarbeiter soll gesteigert werden.
- Die zunehmende Komplexität und die wachsende Anforderung nach Veränderungen sollen von den Mitarbeitern erkannt werden.
- Die Leistungsreserven der Mitarbeiter sollen genutzt werden.



## Mitarbeiterbezogene Ziele:

- Die Mitarbeiter sollen wissen, welches berufliches Ziel sie anstreben wollen.
- Sie haben die Möglichkeit zu prüfen, welche Aufgaben sie in der Organisation übernehmen möchten.
- Sie können daran arbeiten, inwieweit sie ihre momentanen Tätigkeiten ausfüllen, unter- oder überfordern.
- Ihre Zufriedenheit wird positiv beeinflusst.

Unternehmensbezogene Ziele und mitarbeiterbezogene Ziele stehen in einem engen Zusammenhang.

## Weitere Ziele der Personalentwicklung

### 1. Verbesserung der Arbeitswelt

- Entwicklung einer Unternehmenskultur
- Abstimmung von Verhaltensweisen und Wertvorstellungen der Mitarbeiter und der Unternehmensstrategie durch Schaffung von Unternehmensleitbildern
- Erhöhte Identifikation mit dem Unternehmen, verbesserte Handlungsorientierung

### 2. Erhöhung der Mitarbeiterbereitschaft zu Neuerungen

- Fähigkeiten sollen nicht nur entwickelt, erweitert und erhalten werden, sondern auch die Wertvorstellung und Einstellung des Mitarbeiters
- Mitarbeiter sollen lernen, Veränderungen als Chance wahrzunehmen



## Realistisches Menschenbild als Grundlage

**Einflussfaktoren sind:**

- ➔ Die Bedürfnisstruktur
- ➔ Die Erwartungshaltung



## Der Begriff „Karriereanker“

Es handelt sich beim Karriereanker um individuen-spezifische Orientierungsmuster innerhalb des Berufslebens, die einen deutlichen Bezug zur individuellen Motiv- und Bedürfnisstruktur erkennen lassen.

### Die einzelnen Karriereanker sind:

- ➔ Managementkompetenz
- ➔ Technisch-funktionale Kompetenz
- ➔ Varietät
- ➔ Autonomie
- ➔ Kreativität
- ➔ Sicherheit



Ansatzfelder der Personalentwicklung

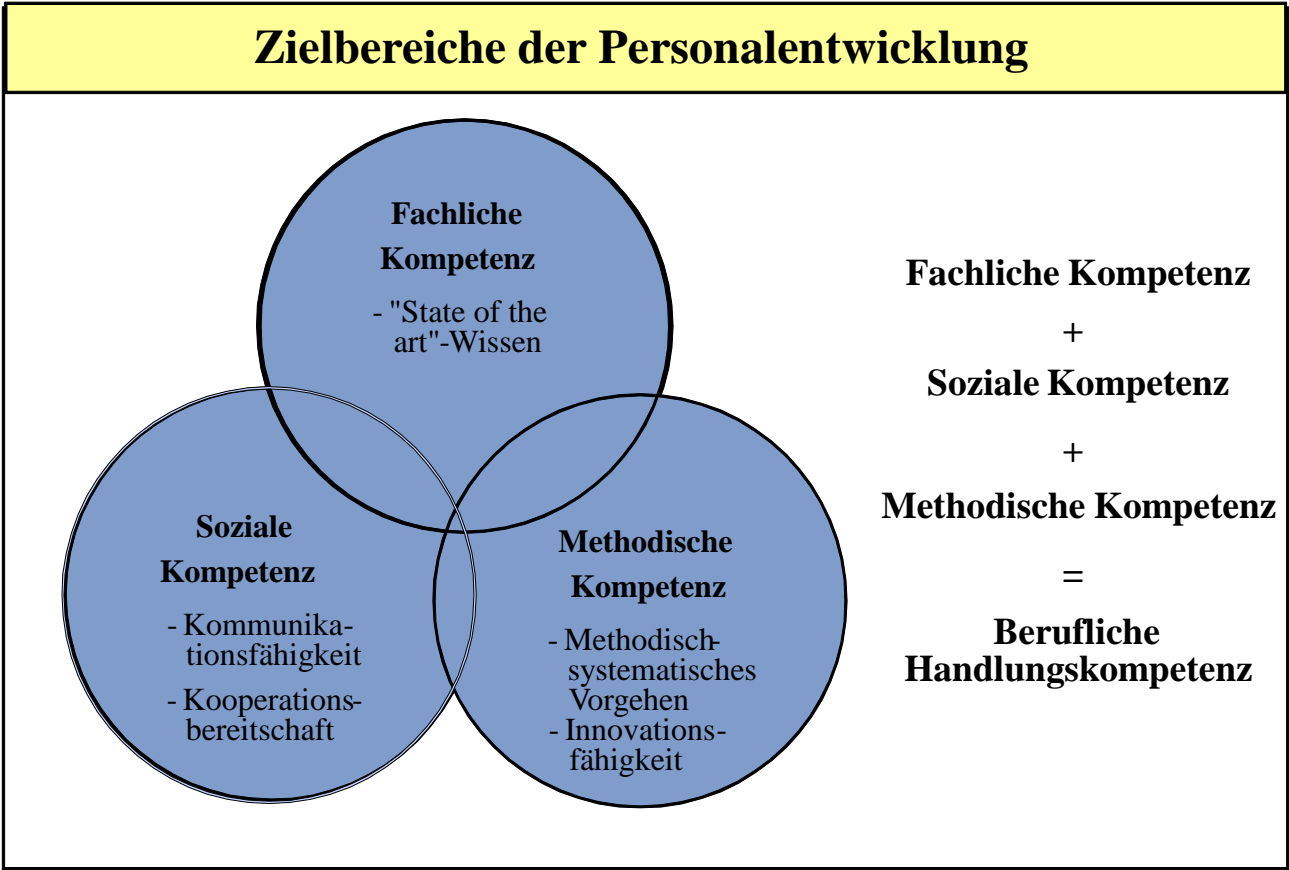

S. 148 Abb. 83



## Aufgaben der Personalentwicklung

- ➔ **Realistisches Menschenbild als Grundlage**
- ➔ **Ansatzfelder der Personalentwicklung**
- ➔ **Aktionsfelder und Maßnahmen**
- ➔ **Zielgruppen der Maßnahmen**





Schulungsplanung

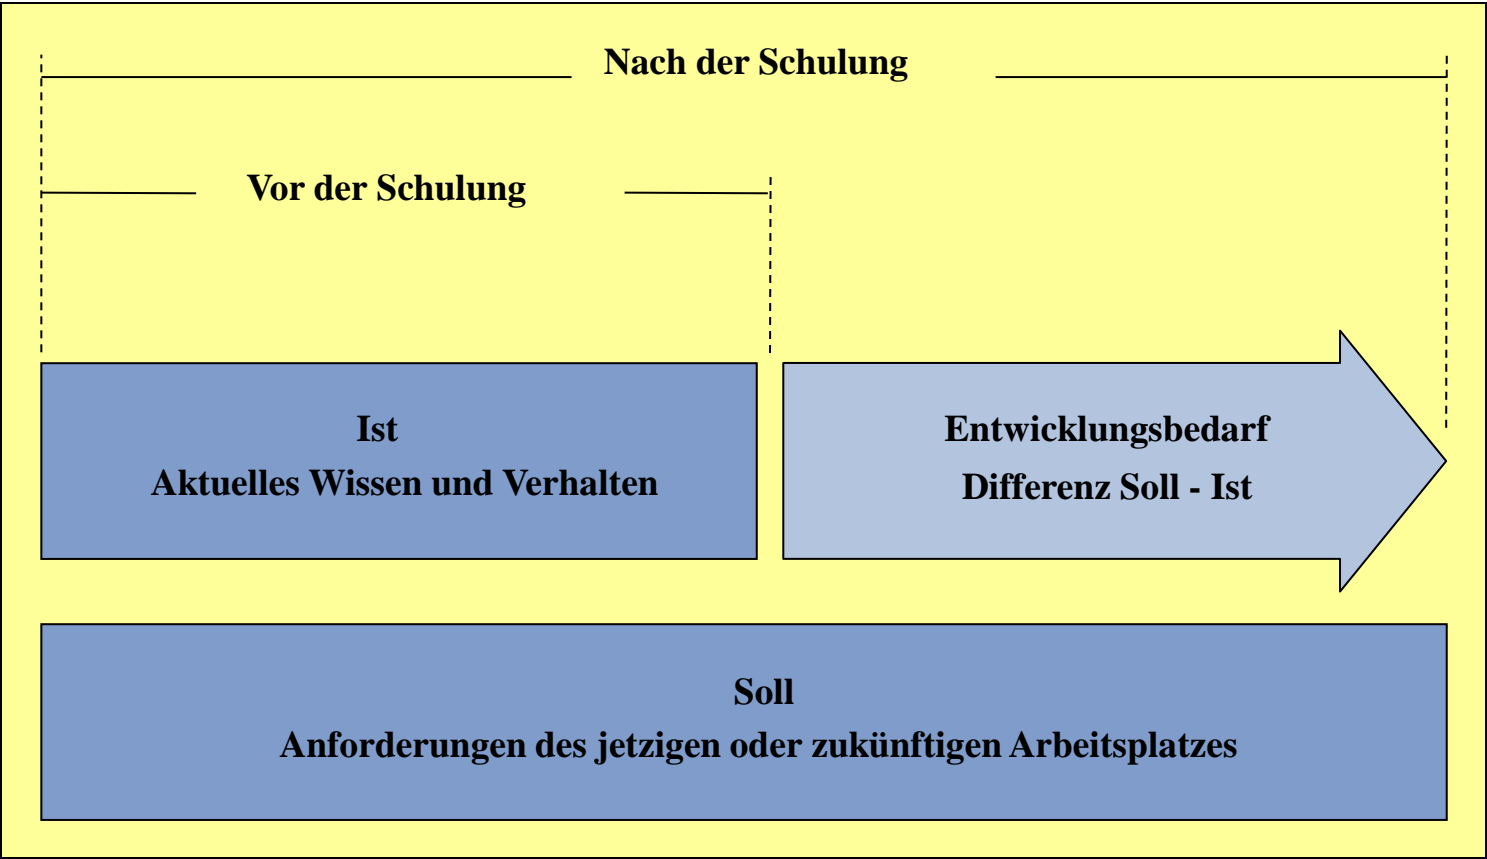

S. 257 Abb. 84

### **Schulungsgrundsätze**

- Da der wirtschaftliche Erfolg unseres Unternehmens entscheidend von der Qualifikation unserer Fach- und Führungskräfte abhängt, legen wir großen Wert auf die kontinuierliche berufliche und persönliche Weiterentwicklung aller Mitarbeiter. Daneben streben wir die Sicherstellung des kaufmännischen und technischen Nachwuchses aus den eigenen Reihen an.
- Zur Erfüllung dieser Ziele wollen wir eine zukunftsorientierte Schulung aller Mitarbeiter durchführen, deren Aufgaben neben der Beseitigung von Schwachstellen vor allem in der Entwicklung des Mitarbeiterpotentials für die Zukunft liegt.
- Schulungsmaßnahmen sollen nach Möglichkeit durch Vorgesetzte unserer Unternehmung am Arbeitsplatz durchgeführt werden. Beim Einsatz externer Ausbilder ist sicherzustellen, dass die vermittelten Kenntnisse und Fähigkeiten am jeweiligen Arbeitsplatz auch genutzt werden können.
- Die Schwerpunkte der Personalentwicklungsmaßnahmen sollen in der Führungsschulung nach den Prinzipien einer kooperativen Mitarbeiterführung und der Ausrichtung der betrieblichen Tätigkeit auf den europäischen Markt liegen.
- Die Personalabteilung ist für den Entwurf eines Schulungskonzeptes und die Planung und Durchführung der Ausbildungsmaßnahmen in Zusammenarbeit mit den Fachabteilungen verantwortlich.

S. 259 Abb. 85

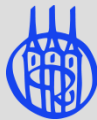

Beispiele für ein Schulungskonzept

| Schulungskonzept 2011 – 2013 (Auszug)                |                                                        |                                       |                                                         |                                                   |                                                                                                                                                                |
|------------------------------------------------------|--------------------------------------------------------|---------------------------------------|---------------------------------------------------------|---------------------------------------------------|----------------------------------------------------------------------------------------------------------------------------------------------------------------|
| Schulungs-<br>bereiche<br>Mitarbeiter-<br>tergruppen | Führungs-<br>kräfte-<br>schulung                       | Innovations-<br>schulung              | Fach-<br>schulung                                       | Persönlich-<br>keitsbildung                       | Allgemeine<br>Bildung                                                                                                                                          |
| Führungs-<br>ebene I                                 | Führungs-<br>richtlinien<br>2011/3 Tage<br>2012/2 Tage | Kreative<br>Strategien<br>2012/3 Tage |                                                         |                                                   | Kontakt-<br>seminare<br>mit allgem.<br>Erfahrungs-<br>austausch<br>und gemeins.<br>Besuch von<br>Messen od.<br>Veranstal-<br>tungen<br><br>jedes Jahr<br>1 Tag |
| Führungs-<br>ebene II<br>(Technik)                   | Führungs-<br>richtlinien<br>2012/2 Tage                |                                       |                                                         | Stressbe-<br>wältigung<br>2012/2 Tage             |                                                                                                                                                                |
| Führungs-<br>ebene II<br>(Verkauf)                   |                                                        |                                       |                                                         | Zeitmanage-<br>ment<br>2011/2 Tage<br>2013/2 Tage |                                                                                                                                                                |
| Mitarbeiter<br>(Technik)                             |                                                        | EDV<br>jedes Jahr<br>4 Tage           | Elektronik<br>2011/4 Tage<br>2012/4 Tage<br>2013/3 Tage |                                                   |                                                                                                                                                                |
| Mitarbeiter<br>(Verkauf)                             |                                                        | EDV<br>jedes Jahr<br>3 Tage           | Gesprächs-<br>führung<br>2011/3 Tage                    |                                                   |                                                                                                                                                                |

S. 260 Abb. 86

| <b>Thema: Elektronische Datenverarbeitung (Grundkurs)</b>                                                                                                                                                                                                 |                                                                                                                                   |              |                                                                                                         |
|-----------------------------------------------------------------------------------------------------------------------------------------------------------------------------------------------------------------------------------------------------------|-----------------------------------------------------------------------------------------------------------------------------------|--------------|---------------------------------------------------------------------------------------------------------|
| <b>Ziel:</b> Die Teilnehmer sollen mit den theoretischen Grundlagen für den Umgang mit der elektronischen Datenverarbeitung, deren Hard- und Softwarekomponenten und den Möglichkeiten des betrieblichen Einsatzes von Computern vertraut gemacht werden. |                                                                                                                                   |              |                                                                                                         |
| <b>Lehrinhalt</b>                                                                                                                                                                                                                                         | <b>Lernziel</b>                                                                                                                   | <b>Dauer</b> | <b>Methodische Hinweise</b>                                                                             |
| <b>1. Hardware</b>                                                                                                                                                                                                                                        |                                                                                                                                   |              |                                                                                                         |
| 1.1 Der Aufbau einer EDV-Anlage                                                                                                                                                                                                                           | Die Teilnehmer sollen den technischen Aufbau einer EDV-Anlage schematisch kennenlernen                                            | 2 h          | Theoretische Unterweisung                                                                               |
| 1.2 Ein- und Ausgabegeräte                                                                                                                                                                                                                                | Funktionsweise und Anwendung moderner Ein- und Ausgabegeräte wie Drucker, Bildschirm, Magnetkarten- und Barcodeleser kennenlernen | 1,5 h        | Theoretische Unterweisung mit Praxisbeispielen                                                          |
| 1.3 Speichermedien                                                                                                                                                                                                                                        | Arten und Besonderheiten von magnetischen und optischen Speichermedien kennenlernen                                               | 1 h          | Theoretische Unterweisung mit Praxisbeispielen                                                          |
| <b>2. Software</b>                                                                                                                                                                                                                                        |                                                                                                                                   |              |                                                                                                         |
| 2.1 Betriebssysteme                                                                                                                                                                                                                                       | Arten von Betriebssystemen für Einzelarbeitsplatz und Netzwerk unterscheiden können                                               | 3 h          | Theoretische Unterweisung mit praktischem Übungsteil (Windows XP)                                       |
| 2.2 Standardsoftware                                                                                                                                                                                                                                      | Funktionen und Einsatzgebiete von Textverarbeitung und Tabellenkalkulation erkennen                                               | 4 h          | Theoretische Unterweisung mit praktischem, arbeitsplatzbezogenen Übungsteil                             |
| 2.3 CIM-Systeme                                                                                                                                                                                                                                           | Möglichkeiten eines Computereinsatzes für weitere betriebliche Funktionsbereiche erkennen                                         | 4 h          | Theoretische Unterweisung mit einer Analyse der Möglichkeiten im eigenen Unternehmen im Gruppengespräch |
| Schulungstermin: 9. - 10. Mai 2011<br>Die Teilnehmerzahl ist auf 12 Personen begrenzt                                                                                                                                                                     |                                                                                                                                   |              |                                                                                                         |

S. 261 Abb. 87



Personalentwicklungsinhalte

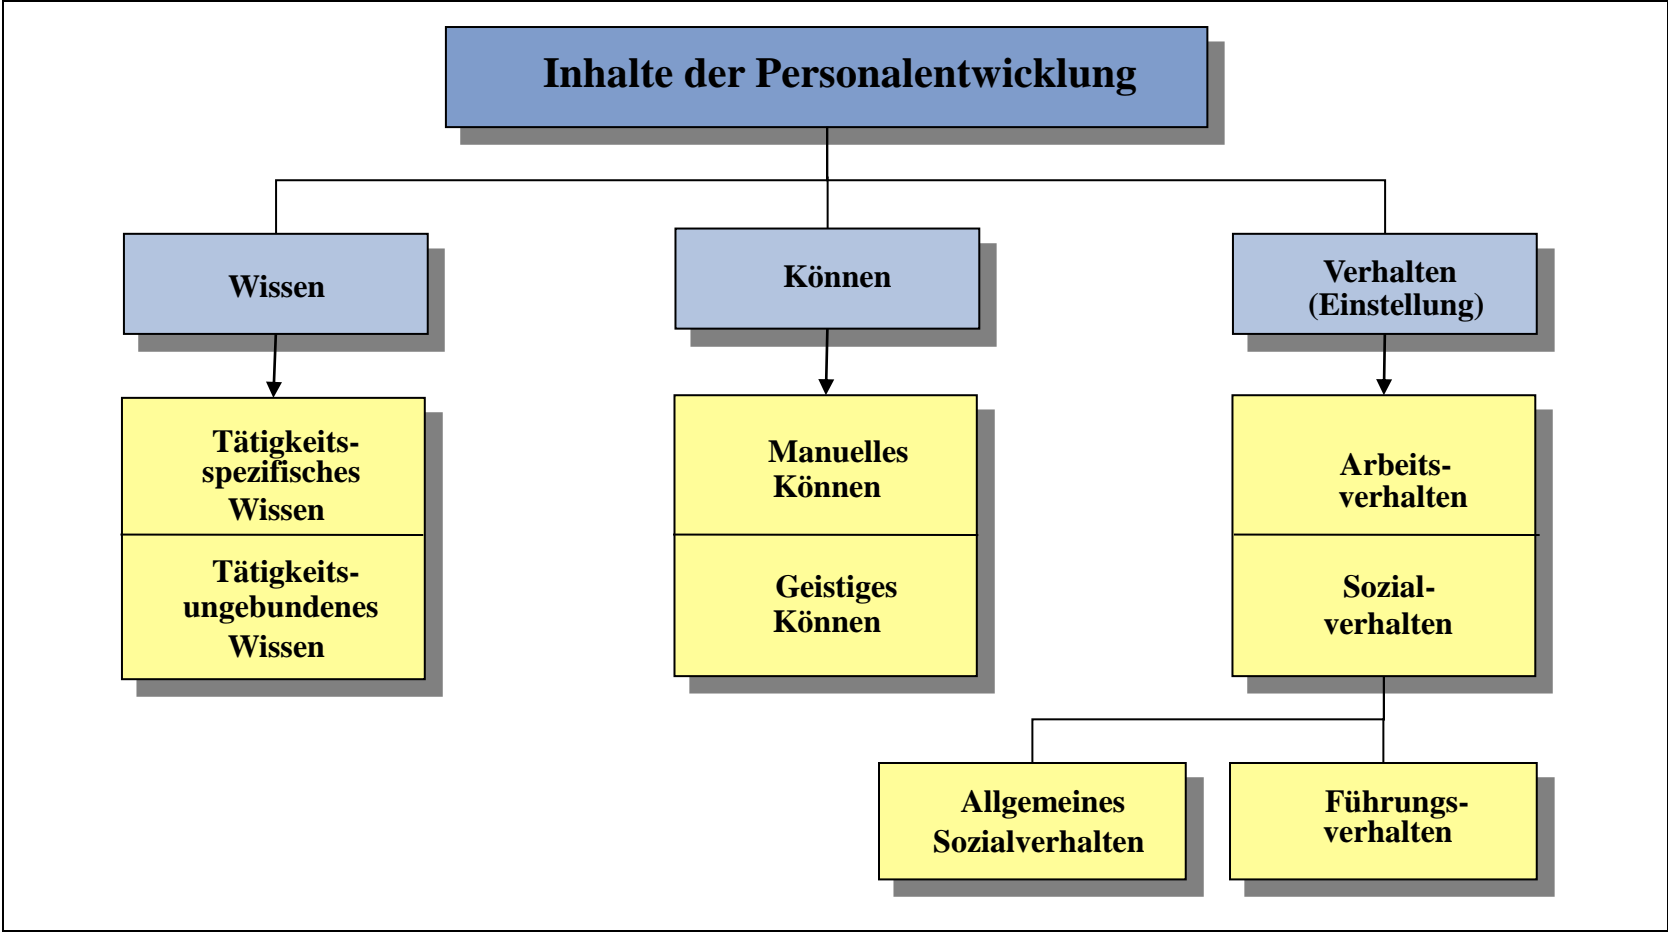

S. 262 Abb. 88  
(in Anlehnung an: Mentzel, W.: Unternehmenssicherung durch Personalentwicklung. Mitarbeiter motivieren, fördern und weiterbilden, 6. Aufl., Freiburg i. Br. 1994, S. 166.)

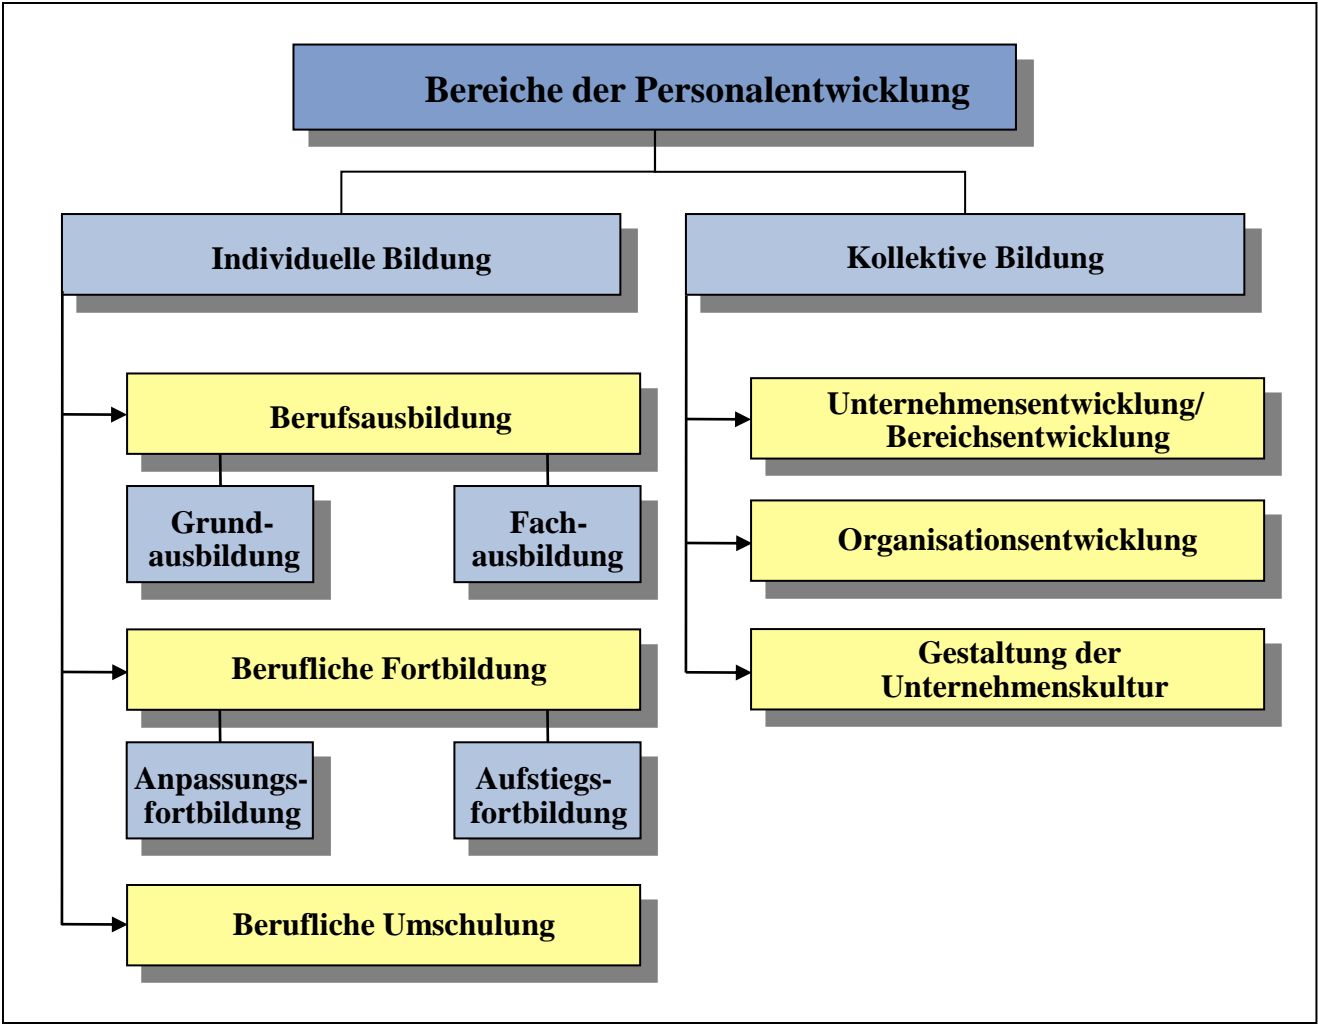

S. 264 Abb. 89



Planung und Abläufe der bereichsbezogenen Bildungsarbeit

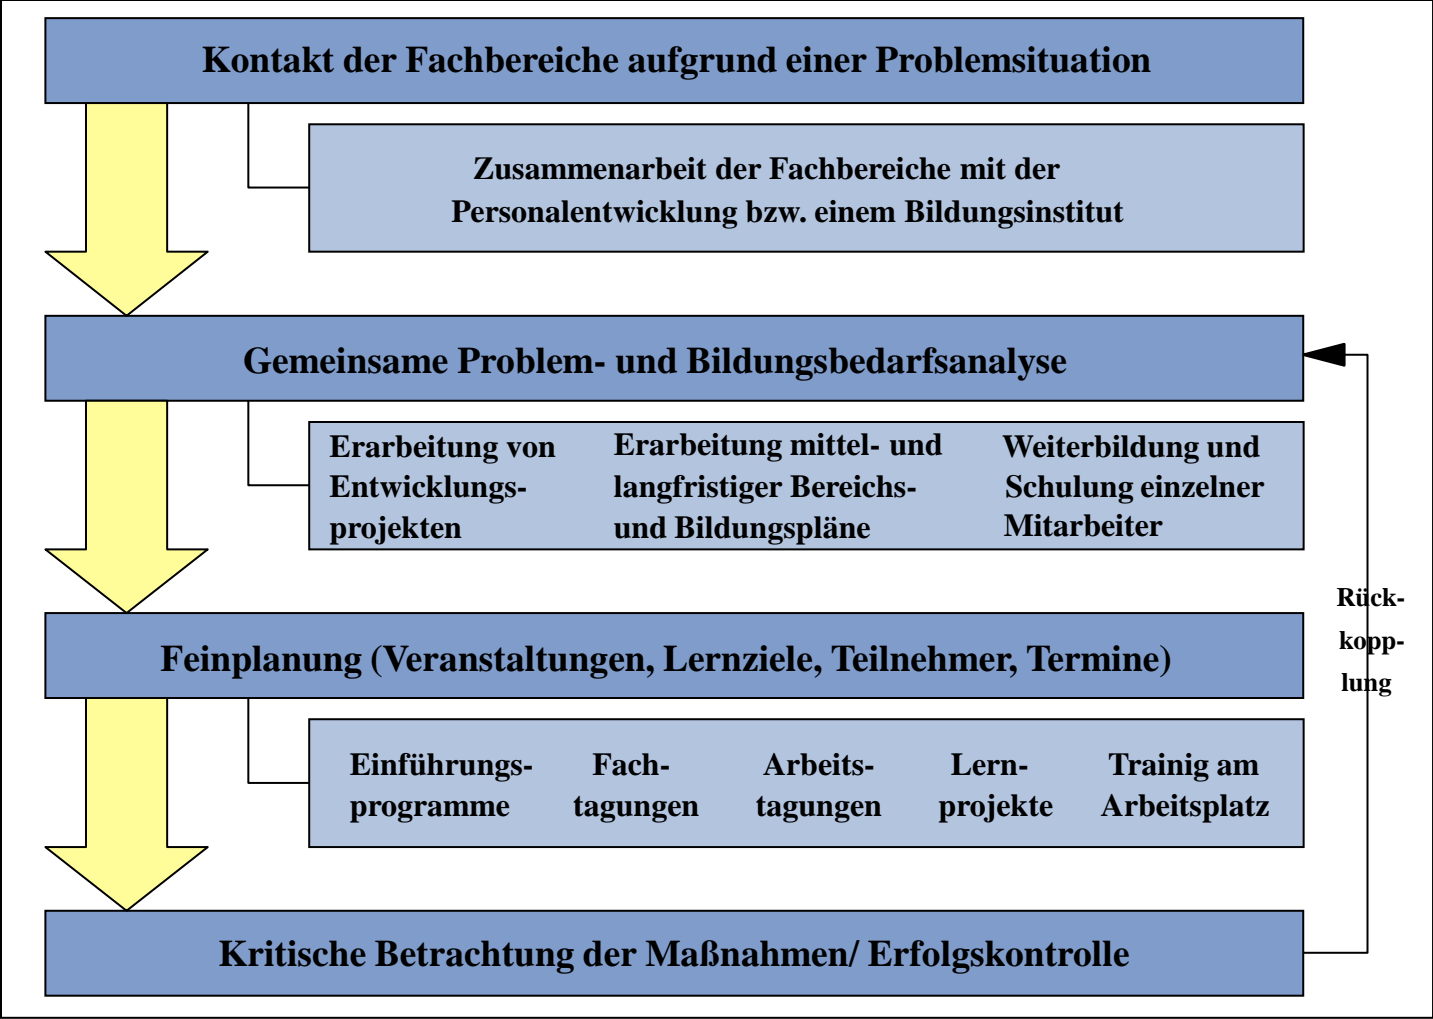

S. 268 Abb. 90

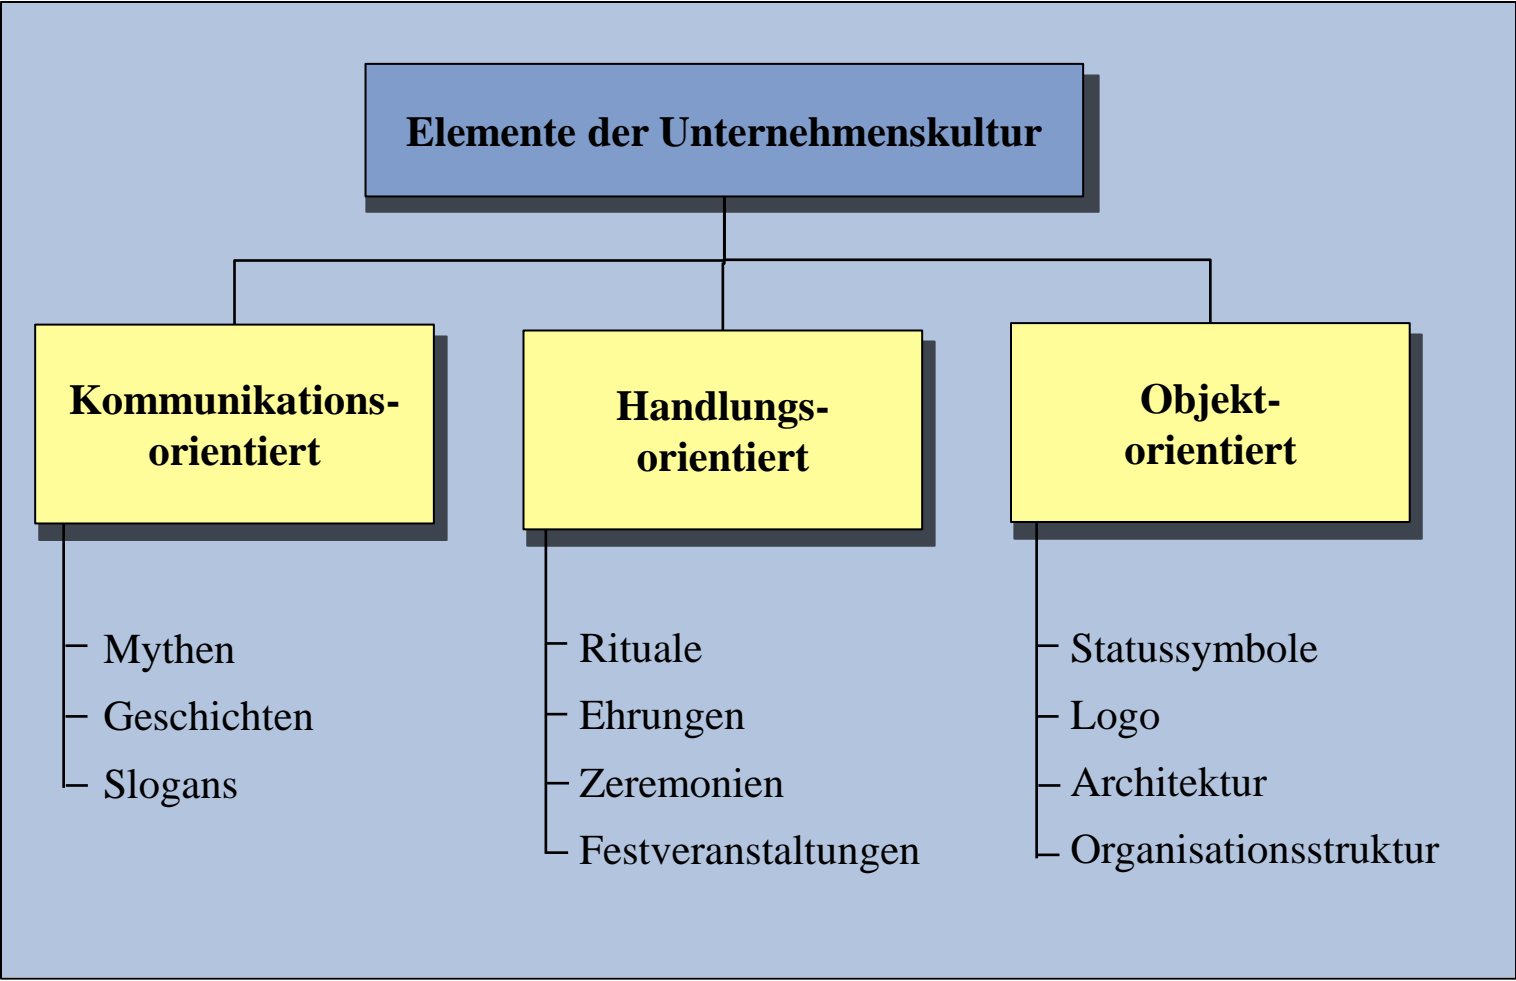

S. 270 Abb. 91





Die drei Lernbereiche

| Persönlich-<br>keitsebene | Lernprozess                                                                                                                                                                |                                                                                                                                        |                                                                                                                                                                |
|---------------------------|----------------------------------------------------------------------------------------------------------------------------------------------------------------------------|----------------------------------------------------------------------------------------------------------------------------------------|----------------------------------------------------------------------------------------------------------------------------------------------------------------|
| Kognitiv                  | <div>Erinnern an Bekanntes</div> <div>Begriffe und Inhalte</div> <div>- wiedergeben</div> <div>- nennen</div> <div>- reflektieren</div>                                    | <div>Verstehen von Zusammenhängen</div> <div>Zusammenhänge</div> <div>- erkennen</div> <div>- beschreiben</div> <div>- begründen</div> | <div>Anwenden auf Problemstellungen</div> <div>Probleme</div> <div>- analysieren</div> <div>- mit Wissen verknüpfen</div> <div>- Alternativen erarbeiten</div> |
| Psycho-<br>motorisch      | <div>Einzelne Bewegungen (Hand-, Bein- und Körperbewegungen) ausführen.</div> <div>Komplexe Bewegungsabläufe (Bedienung einer Maschine, Autofahren etc.) beherrschen</div> |                                                                                                                                        |                                                                                                                                                                |
| Affektiv                  | <div>Bemerken</div> <div>Neues</div> <div>- beachten</div> <div>- prüfen</div> <div>- akzeptieren</div>                                                                    | <div>Interesse</div> <div>Neues</div> <div>- aufnehmen</div> <div>- überdenken</div> <div>- Widerstände überwinden</div>               | <div>Einstellung (Verhalten)</div> <div>Neues</div> <div>- überzeugt annehmen</div> <div>- dafür einstehen</div> <div>- sich identifizieren</div>              |

S. 275 Abb. 92

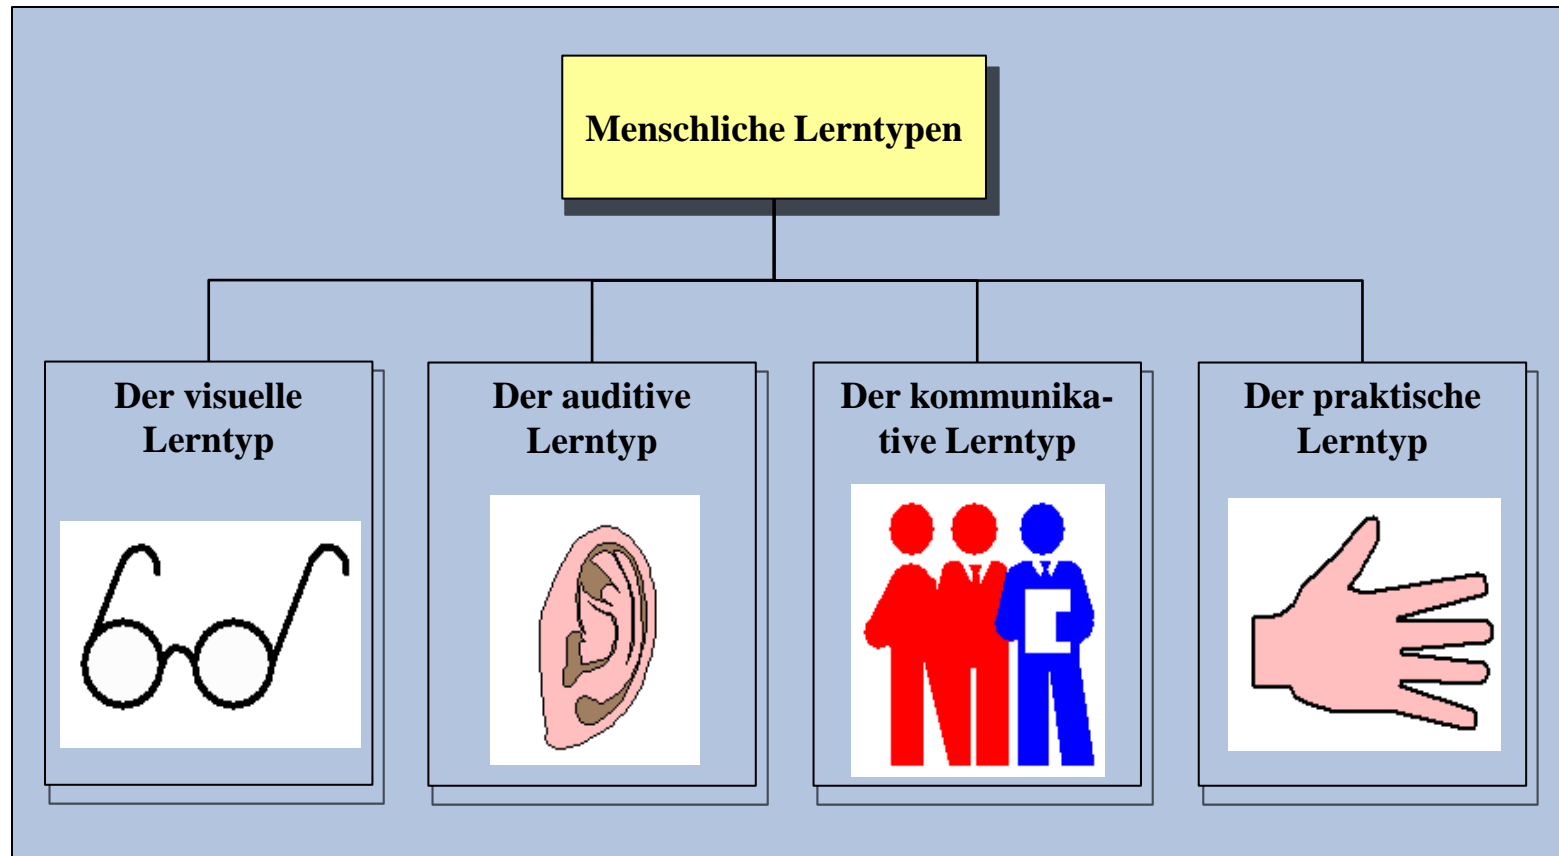



| Persönlichkeitsmerkmale von Referenten |                                                                                                                                                                                                                                                                |
|----------------------------------------|----------------------------------------------------------------------------------------------------------------------------------------------------------------------------------------------------------------------------------------------------------------|
| Eigenschaften und Einstellungen        | <ol style="list-style-type: none"><li>1. Physische und psychische Gesundheit</li><li>2. Positive Grundhaltung, -einstellung</li><li>3. Persönliches Engagement, Offenheit</li><li>4. Handlungsorientierung</li><li>5. Intuition, Einfühlungsvermögen</li></ol> |
| Berufliches Können                     | <ol style="list-style-type: none"><li>1. Vertrauen erzeugen können</li><li>2. Integrationsfähigkeit</li><li>3. Konfrontationsfähigkeit</li><li>4. Prozesskompetenz, strategische Kompetenz</li></ol>                                                           |
| Fachliches Wissen                      | <ol style="list-style-type: none"><li>1. Fachwissen</li><li>2. Fachübergreifendes Wissen</li><li>3. Gruppenpsychologie</li><li>4. Organisationswissen</li></ol>                                                                                                |
| Praktische Erfahrungen                 | <ol style="list-style-type: none"><li>1. Erfahrungen mit sich selbst</li><li>2. Erfahrungen mit anderen Menschen</li><li>3. Erfahrungen mit Gruppen</li><li>4. Erfahrungen mit dem gesellschaftlichen Umfeld</li></ol>                                         |
| Methodenkenntnis                       | <ol style="list-style-type: none"><li>1. Lehrmethoden, Lehrstil</li><li>2. Lehrmedien</li><li>3. Rhetorik, Moderation</li><li>4. Systematik</li></ol>                                                                                                          |

S. 279 Abb. 94

(in Anlehnung an: Ruschel, A.: Personalentwicklung. in: Mensch und Arbeit, Hrsg. von Schneider, H. J., 9. Aufl., Köln 1992, S. 439 f)

## Effiziente Kombination von Medien und Hilfsmitteln

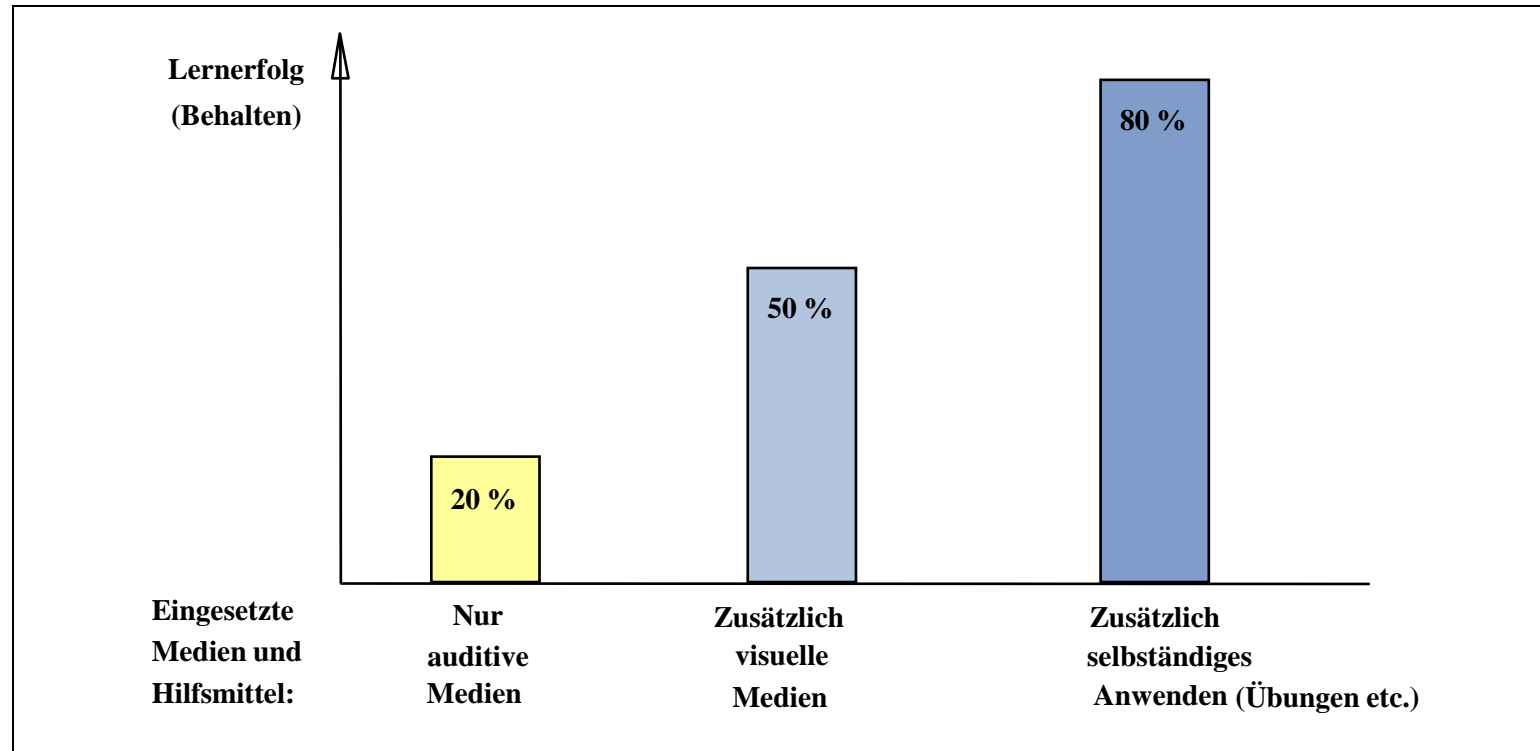

S. 280 Abb. 95

# Hilfsmittel und Medien und deren Einsatzmöglichkeiten

| Hilfsmittel/Medien                                                                                                                                                                                                                                                               | Anwendungsmöglichkeiten                                                                                                                                                                                                                                                                                                                                                                                                                                                                                                                                                                             |
|----------------------------------------------------------------------------------------------------------------------------------------------------------------------------------------------------------------------------------------------------------------------------------|-----------------------------------------------------------------------------------------------------------------------------------------------------------------------------------------------------------------------------------------------------------------------------------------------------------------------------------------------------------------------------------------------------------------------------------------------------------------------------------------------------------------------------------------------------------------------------------------------------|
| <b>1. Auditive Hilfsmittel/Medien</b> <ul style="list-style-type: none"> <li>- Wörtlicher Vortrag</li> <li>- Tonband/ Kassettenrecorder</li> </ul>                                                                                                                               | <p>Zeitsparendes Instrument der Instruktion, erlaubt eine hohe Teilnehmerzahl</p> <p>Geeignet z.B. zum Abspielen von Hintergrundmusik zur Förderung der Konzentration und Entspannung</p>                                                                                                                                                                                                                                                                                                                                                                                                           |
| <b>2. Visuelle Hilfsmittel/Medien</b> <ul style="list-style-type: none"> <li>- Wandtafel</li> <li>- Tageslichtprojektor</li> <li>- Flip-Chart</li> <li>- Pinwand (Metaplan)</li> <li>- Schaubild, Diagramm</li> <li>- Diaprojektor</li> <li>-Anschauungsmaterial (PC)</li> </ul> | <p>Festhalten von Ideen, Notizen und inhaltlichen Strukturen im Unterricht</p> <p>Wie die Wandtafel, jedoch auch Arbeiten mit vorbereiteten Folien möglich</p> <p>Wie die Wandtafel, jedoch kleinere Arbeitsfläche.</p> <p>Vorteil ist, dass Notizen erhalten bleiben (werden nicht ausgewischt, sondern umgeblättert)</p> <p>Erarbeiten/Strukturieren von Vorschlägen u. Ideen</p> <p>Schematische Übersichten, Statistiken etc.</p> <p>Visualisierung komplexer Sachverhalte</p> <p>Vermitteln anschaulicher, praxisnaher Informationen</p> <p>Visualisierung- und Präsentationsmöglichkeiten</p> |
| <b>3. Audiovisuelle Hilfsmittel/Medien</b> <ul style="list-style-type: none"> <li>- Filmprojektion/Videofilme</li> <li>- Videoaufzeichnungen</li> </ul>                                                                                                                          | <p>Verdeutlichung komplexer Sachverhalte, Bewegungsabläufe und Verhaltensweisen</p> <p>Aufzeichnen des eigenen Verhaltens in gestellten Situationen</p>                                                                                                                                                                                                                                                                                                                                                                                                                                             |

S. 280 Abb. 96



## Maßnahmen der Personalentwicklung:

- Personalauswahl (select to the job)
- Integration von neuen Mitarbeitern (into the job)
- Arbeitsplatzbezogene Aktivitäten (on the job)
- Fortbildung (off the job)
- Potentialorientierte Bildungsmaßnahmen (near the job)
- Karriereplanung (along the job)
- Vorbereitung auf den Ruhestand (out of the job)

**Methoden der Personalentwicklung  
“on the job“**

1. Planmäßige Unterweisung
2. Anleitung und Beratung durch den Vorgesetzten
3. Job rotation
4. Übertragung begrenzter Verantwortung
5. Übertragung von Sonderaufgaben
6. Multiple Management
7. Trainee-Programme
8. Einführungsprogramme

**Methoden der Bildung  
“off the job“**

1. Programmierte Unterweisung
2. Vorlesungsmethode
3. Konferenzmethode
  - Lehrkonferenz
  - Problemlösungskonferenz
  - Ideenkonferenz
4. Fallstudien
5. Rollenspiele
6. Planspiele
7. Gruppendynamische Methoden
8. Assessment-Center
9. Bildungsurlaub



## A. Methoden: On the job

### 1. Planmäßige Unterweisung

Als Form der gelenkten Vermittlung von Erfahrungen ist die Unterweisung am Arbeitsplatz eine vom Vorgesetzten kontrollierbare Vorbereitung auf die Durchführung exakt definierter Aufgaben, die auch der Verbesserung der Aufgabenerfüllung dienen kann.

- Traditionelle Aus- und Weiterbildung wird dort ergänzt, wo es in der betrieblichen Praxis auf Selbständigkeit ankommt
- Lerntempo wird den Fähigkeiten angepasst und somit Über- bzw. Unterforderung vermieden
- Mitarbeiter muss sich alle Informationen selbst erarbeiten
- gewährt Entscheidungsfreiheit und bietet Gestaltungsmöglichkeiten





## Abfolge der Vier-Stufen-Methode

1. Vorbereitung
2. Vorführen und Erklären durch die Unterweisenden
3. Ausführen (Nachmachen) durch den Mitarbeiter
4. Abschluss und Übung

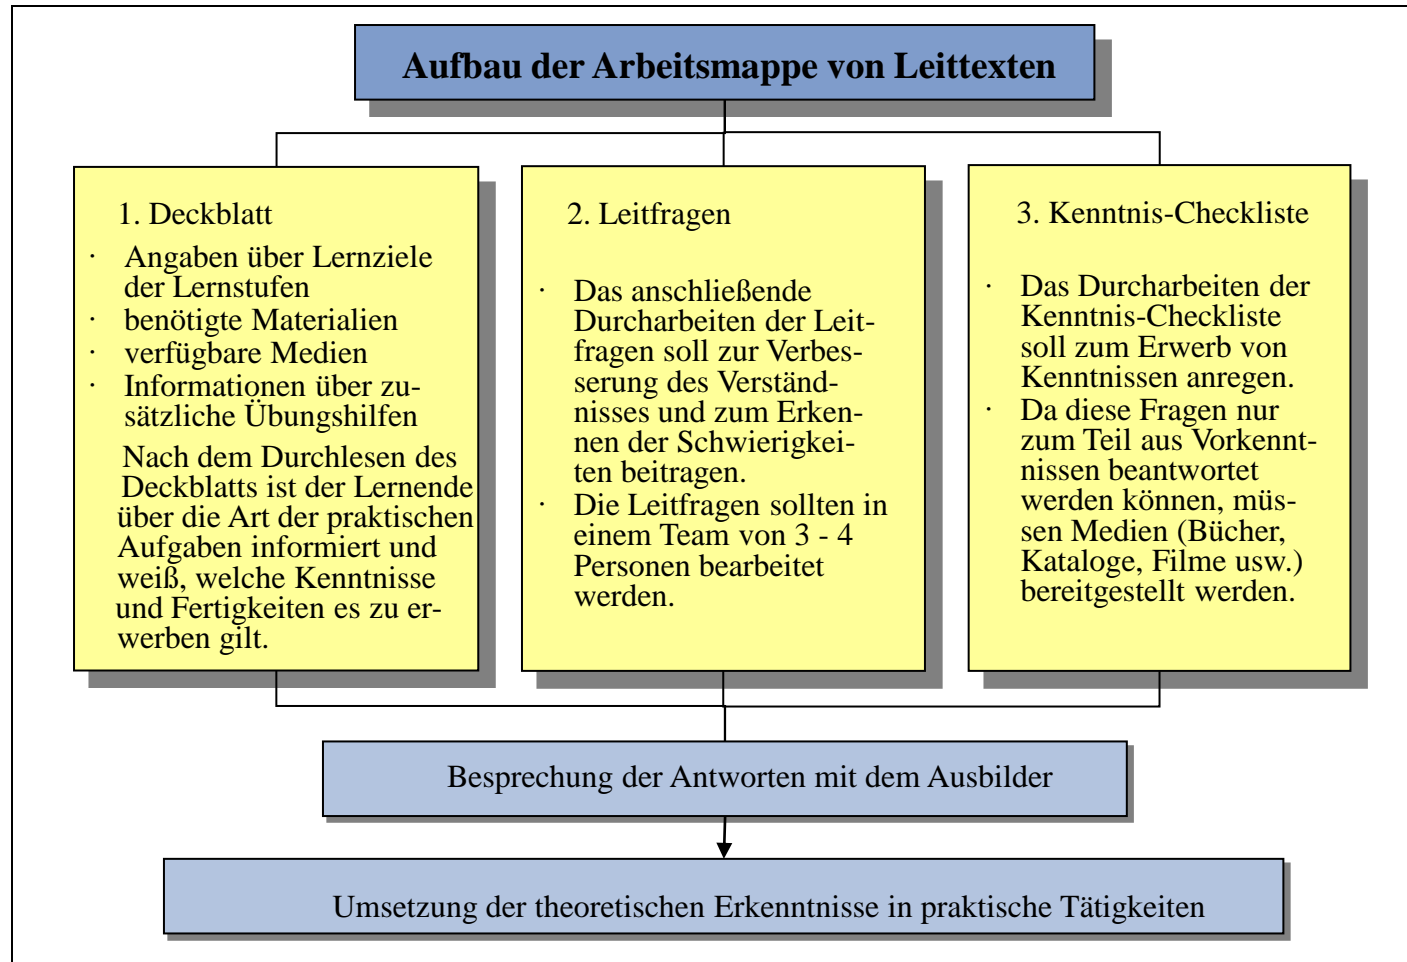

## 2. Anleitung und Beratung durch den Vorgesetzten

Diese Methode umfasst folgende Stufen:

- Auswahl der Arbeitsplätze, die geeignet sind, fehlendes Wissen, Können und Verhalten durch praktische Tätigkeit zu vermitteln
- Auswahl geeigneter Ausbilder, die Anleitung und Beratung durchführen können
- Festlegung der Lernziele und Lerninhalte in Stoff- und Lernprogrammen
- Aufstellung eines Bildungszeitplanes
- Abgabe von Beurteilungen über den Mitarbeiter in festgelegten Zeitabschnitten
- Zusammen mit den Beurteilungen sind von den Ausbildungsvorgesetzten detaillierte Vorschläge für weitere Maßnahmen einzureichen

**Vorteil:** Geringe Kosten

**Nachteil:** Mangelnde didaktische Qualifikation mancher Führungskräfte



Im Rahmen der Vermittlung von Führungsverhalten spielt Modeling und Mentoring eine bedeutende Rolle:

**Modeling:** - Führungsverhalten wird von anderen Führungskräften abgeschaut

**Mentoring:** - Beziehung zwischen einer erfahrenen Führungskraft und einem Nachwuchsmanager

- Aufbau in vier Stufen:

- Initiierung
- Entwicklung
- Trennung
- Neubestimmung



### 3. Job - rotation

Unter Job - rotation versteht man einen systematischen Arbeitsplatztausch zur Vermeidung einseitiger Belastung und Arbeitsplatzmonotonie sowie zur Vermittlung zusätzlicher Qualifikationen.

Job - rotation als Bildungsmethode bietet die Möglichkeit der Übernahme verschiedener Aufgaben um Fachkenntnisse und Erfahrungen zu erweitern.

**Merkmale:**

- Wechsel des Arbeitsplatzes in regelmäßigen Intervallen
- ständig wechselnde Aufgabenbereiche
- Einblick in verschiedene Abteilungen, deren Aufgaben und Arbeitsbereiche

## Job-rotation am Beispiel des RW

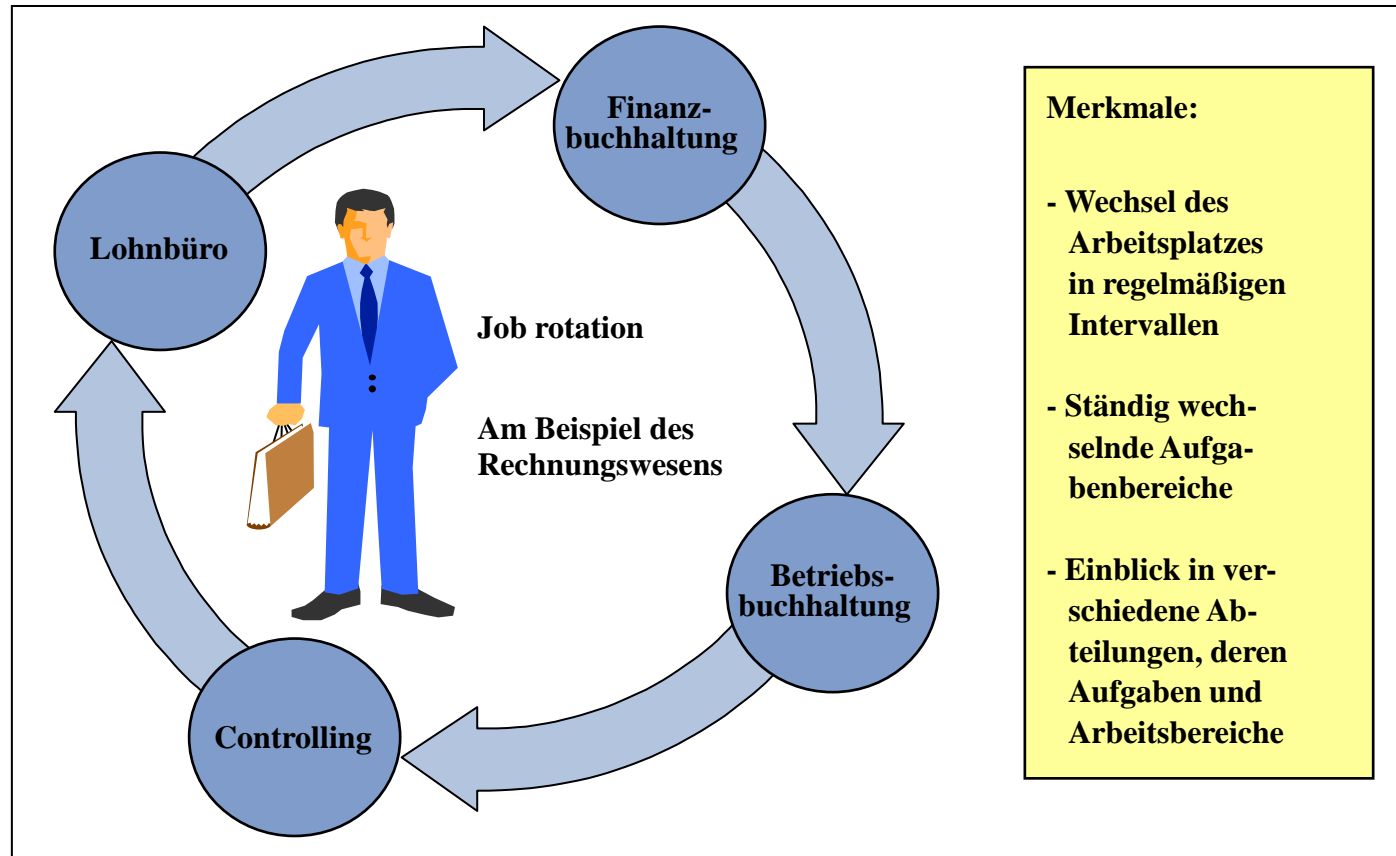



| Vorteile des Job - rotation                                                                                                                                     | Nachteile des Job - rotation                                                                                                                                  |
|-----------------------------------------------------------------------------------------------------------------------------------------------------------------|---------------------------------------------------------------------------------------------------------------------------------------------------------------|
| <ul style="list-style-type: none"><li>· Mitarbeiter erhalten Einblick in mehrere Bereiche eines Unternehmens mit ständig wechselnden Aufgabengebieten</li></ul> | <ul style="list-style-type: none"><li>· Stockung des täglichen Arbeitsablaufes aufgrund der Einarbeitung des neuen Mitarbeiters</li></ul>                     |
| <ul style="list-style-type: none"><li>· Durch den neuen Mitarbeiter kommen neue Ideen in die Abteilung hinein</li></ul>                                         | <ul style="list-style-type: none"><li>· Reservierte Einstellung von Vorgesetzten gegenüber dem Programm, die gute Mitarbeiter zu verlieren fürchten</li></ul> |
| <ul style="list-style-type: none"><li>· Für den Mitarbeiter wachsen die Karriere-Chancen</li></ul>                                                              | <ul style="list-style-type: none"><li>· Programm setzt eine bestimmte Mindestanzahl von Mitarbeitern voraus, damit die Rotation funktioniert</li></ul>        |



## 4. Übertragung begrenzter Verantwortung

- Dem Mitarbeiter werden Teilaufgaben ohne die entsprechende Führungsverantwortung übertragen
- Dem Mitarbeiter wächst unter der Kontrolle des Vorgesetzten in das Aufgabengebiet hinein
- Dem Mitarbeiter kann dabei die Position eines Nachfolgers oder Assistenten beziehen
- Als Nachfolger wird die Verantwortung später dauerhaft übernommen
- Eine Assistentenstelle wird vorübergehend im Rahmen der beruflichen Entwicklung eingenommen





## 5. Übertragung von Sonderaufgaben

- Übertragung von Spezialaufgaben die einmalig oder unregelmäßig anfallen
- Mitarbeiter arbeitet eigenverantwortlich und erhält die Möglichkeit sich über Routineaufgaben hinaus zu bewähren
- besondere Form bilden Sonderaufgaben bei denen Führungskräfte ins Ausland geschickt werden



## 6. Multiple Management

- Bildung eines Quasi - Vorstandes, dem in regelmäßigen Abständen reale Entscheidungsprobleme des eigentlichen Vorstandes zur Bearbeitung vorgelegt werden
- dem Quasi - Vorstand stehen dabei alle Informationen zur Verfügung
- Ziel ist die Förderung von selbständigen, handlungsbezogenen Lernen sowie die Erhöhung der Bereitschaft zur Übernahme von Verantwortung
- im Allgemeinen wird die Motivation erhöht und komplexe Zusammenhänge praxisbezogen vermittelt



## 7. Trainee-Programme

Trainee-Programme sind spezielle Einarbeitungsprogramme, in denen Hochschulabsolventen systematisch mit dem gesamtbetrieblichen Geschehen, der Unternehmensphilosophie und –politik, den strukturellen Zusammenhängen und konkreten Arbeitsanforderungen des Unternehmens vertraut gemacht werden.

Die **wesentlichen Merkmale** sind:

- Dauer mindestens sechs, höchstens 24 Monate
- Das Programm ist systematisch geplant, organisiert und didaktisch strukturiert
- Der Teilnehmerkreis beschränkt sich in der Regel auf wenige Hochschulabsolventen
- Das Programm beinhaltet einen systematischen Arbeitsplatzwechsel in einem oder mehreren Funktionsbereichen
- Es enthält häufig ergänzende Bildungsmaßnahmen des Training off the job



# Aufgaben und Ziele von Trainee-Programmen

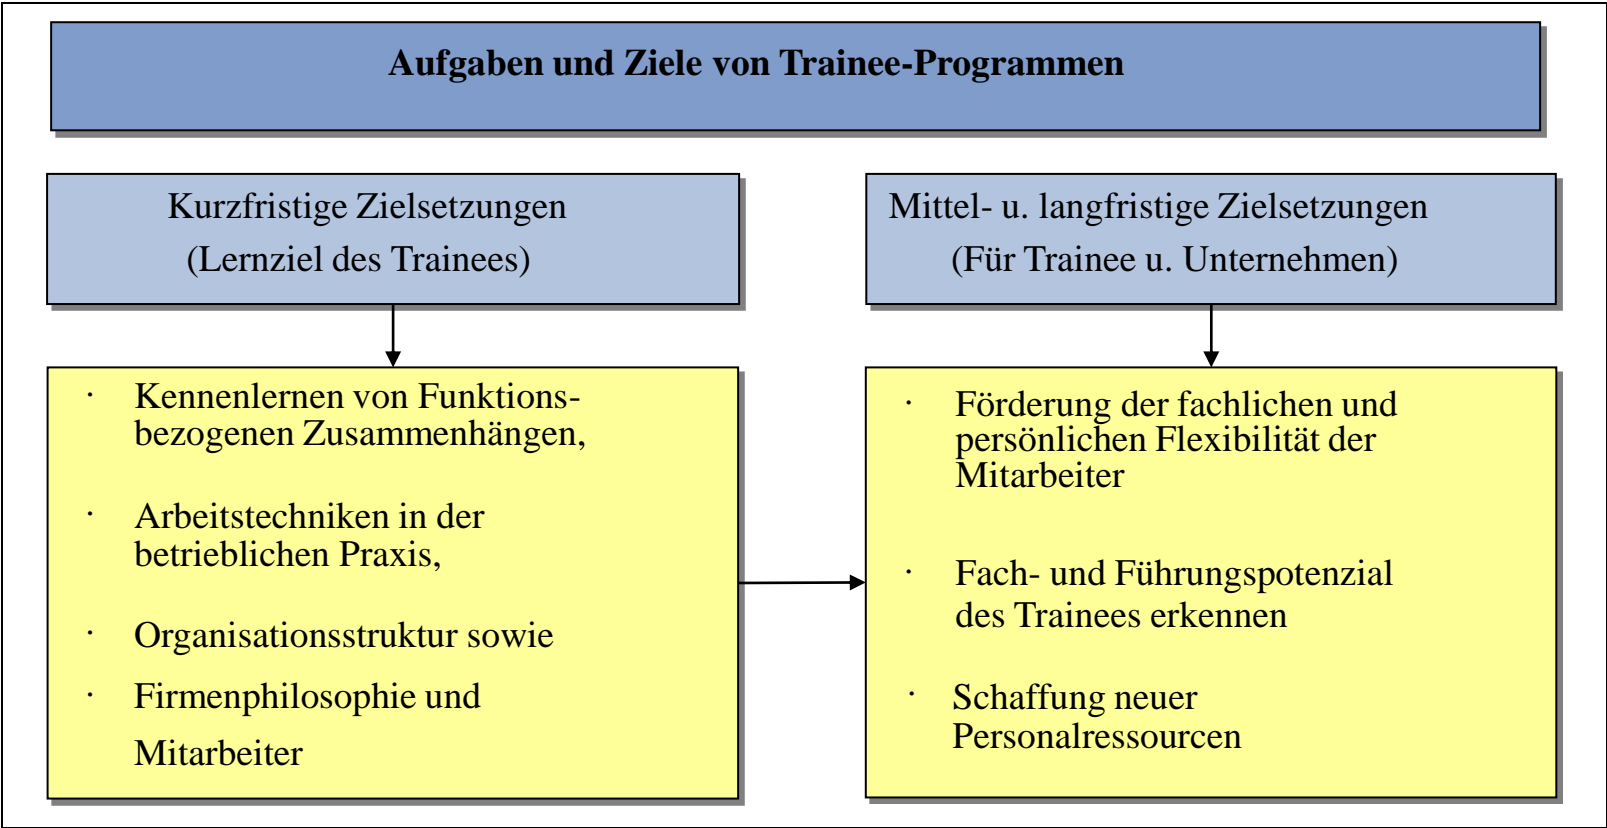

S. 289 Abb. 102



## 8. Einführungsprogramme

- Einführungsprogramme stellen eine Sonderform dar
- weisen neue Mitarbeiter in ihr künftiges Aufgabengebiet sowie in die Betriebsgemeinschaft ein
- Ziel ist es die Unsicherheit neuer Mitarbeiter zu überwinden, indem Gespräche und Vorstellungen bei Kollegen, Vorgesetzten und anderer Abteilungen zur Vermittlung umfassenden Wissens über das Unternehmen durchgeführt werden



## B. Methoden off the job

### 1. Programmierte Unterweisung

Ist eine Lehrmethode, die als aktives Selbststudium durchgeführt wird und meist an den Einsatz bestimmter Hilfsmittel wie z.B. Lehrbücher, Personal - Computer oder audiovisuelle Techniken gebunden ist.

Programmierte Unterweisungen in der betrieblichen Weiterbildung sind geeignet für:

- Vermittlung großer Mengen an Fakten und Informationen an Führungs- und Führungskräftenachwuchs
- Informationsvermittlung über Aufgabeninhalte von Arbeitsplätzen, deren Besetzung häufig wechselt
- Informationen über neue Geräte, Verfahren und Produkte, die an dezentral eingesetzte Mitarbeiter in gründlicher und gleicher Weise mitgeteilt werden müssen

- **Lineare Programmierung**

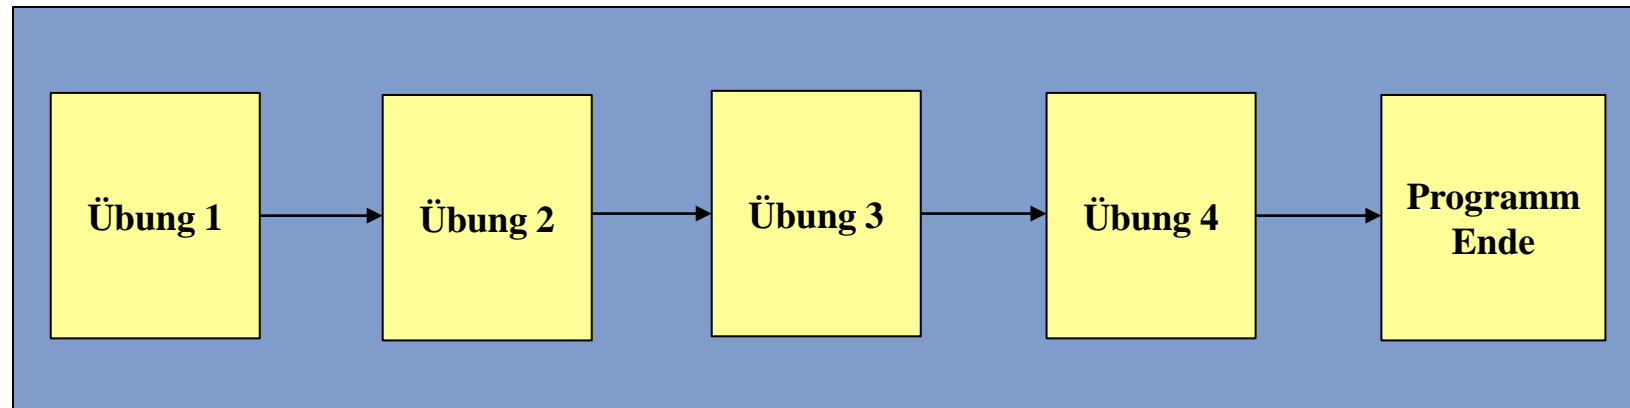

- **Verzweigte Programmierung**

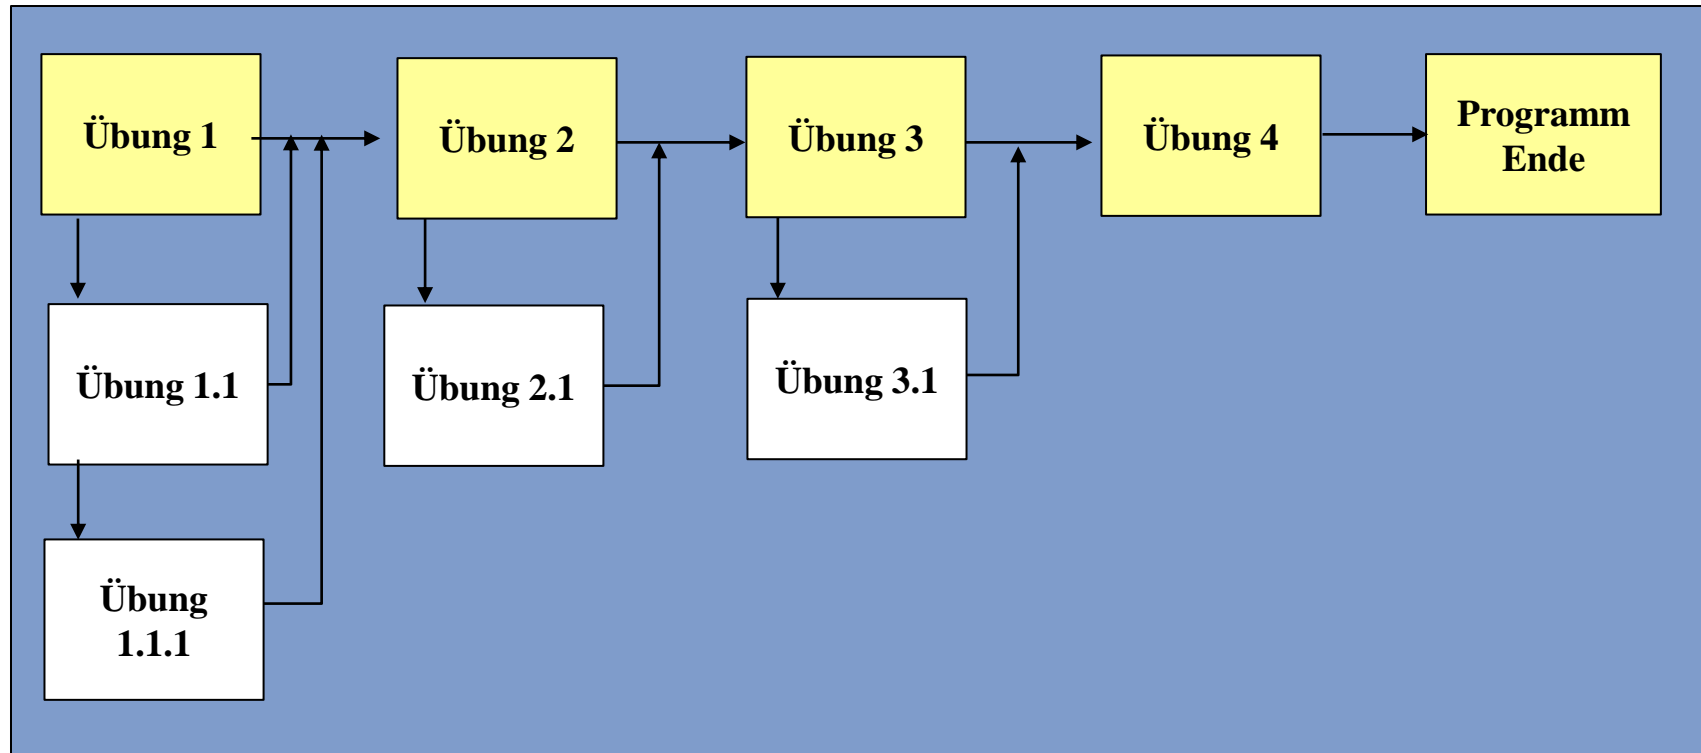





## 2. Vorlesungsmethode / Vortrag / Referat

- ist eine passive Lehrmethode, bei der der Informationsprozess einseitig vom Vortragenden zum Lernenden erfolgt
- hat den Vorteil der systematischen Wissensvermittlung wobei konzentrierte Aussagen über ein großes Wissensgebiet einer beliebigen Anzahl von Zuhörern zeit und kostengünstig vermittelt werden können
- entscheidende Nachteile entstehen durch ein vorausgesetztes Bildungsniveau um dem Vortragenden folgen zu können und der Ermüdung der Zuhörer durch Passivität und permanent notwendige Aufmerksamkeit
- dem wird in der Praxis der Einsatz entsprechender Medien sowie der Ergänzung durch aktive Lernmethoden entgegen gewirkt



### 3. Konferenzmethode

Form der aktiven Lernmethode, bei der das Lernen durch die Beteiligung an der Diskussion, welche durch einen Konferenzleiter gelenkt wird, erfolgt.

**Wichtige Konferenzmethoden sind:**

- **Lehrkonferenz** dient der Erweiterung vorhandenen Wissens, der Durcharbeitung von Stoffgebieten und der Übung im folgerichtigen Denken
- **Problemlösungskonferenz** dient der selbständigen Bearbeitung von Problemen durch Teilnehmer, die ein gewisses Maß an Sachkenntnis besitzen
- **Ideenkonferenz** als spezielle Form der Gruppensitzung, in der kreative Leistungen erbracht werden um neue Lösungsmöglichkeiten von Problemen zu erhalten



## 4. Fallstudien

Mit Hilfe von Fallstudien werden Problemsituationen aus dem betrieblichen Alltag simuliert, indem einer Gruppe ein Fall zur Bearbeitung gegeben wird. Die Gruppe versucht unter Mitwirkung aller einen Lösungsansatz zu erarbeiten.

### **Vorteile:**

- **Teilnehmer entwickeln analytische Fähigkeiten, die ihnen in der täglichen Praxis das Vorbereiten und Treffen von Entscheidungen erleichtern**
- **Die Bereitschaft zum kooperativen Handeln im Management wird verstärkt. Durch die aktive Mitarbeit aller wird ein Erfahrungsaustausch zur Entscheidungsfindung herbeigeführt.**
- **Die Persönlichkeitsmerkmale der Mitarbeiter werden durch die aktive Beteiligung an den Diskussionen zur Vorbereitung und Entwicklung von Problemlösungen gestärkt.**



(Fortsetzung)

**Nachteile:**

- Wenn die Tatbestände die Vergangenheit schildern, können keine zukunftsbezogenen Aussagen mit der Lösung verbunden werden.
- Zugrundeliegende Fallstudien sind nicht praxisnah.
- Die Kosten für die Modellkonstruktion sind zu hoch oder die Durchführung benötigt zu viel Zeit.
- Es wird nicht nach eigenen Problemlösungen gesucht, sondern nach den Lösungen von erfolgreichem Vorgehen aus der Vergangenheit gehandelt.



## 5. Rollenspiele

Sehr realistische Simulationsmethode die besonders zum Training von Führungs- und Kooperationsverhalten geeignet ist. Sie findet Anwendung beim Lernen von Verhandlungsführung und beim Aufzeigen von Kommunikationsproblemen, wobei die Teilnehmer verschiedene Rollen übernehmen, um Verständnis für unterschiedliche Standpunkte zu erhalten.

### **Ziele:**

- Problemanalyse als diagnostisches Mittel zur Analyse von Problemsituationen
- Situationstraining um neue und ungewohnte Verhaltensweisen sowie die Analyse von Konsequenzen und Reaktionen auf geplante Aktionen zu üben
- Rollentausch zum besseren Verstehen von Verhaltensweisen und Motivation anderer



# Möglichkeiten und Ziele des Rollenspiels

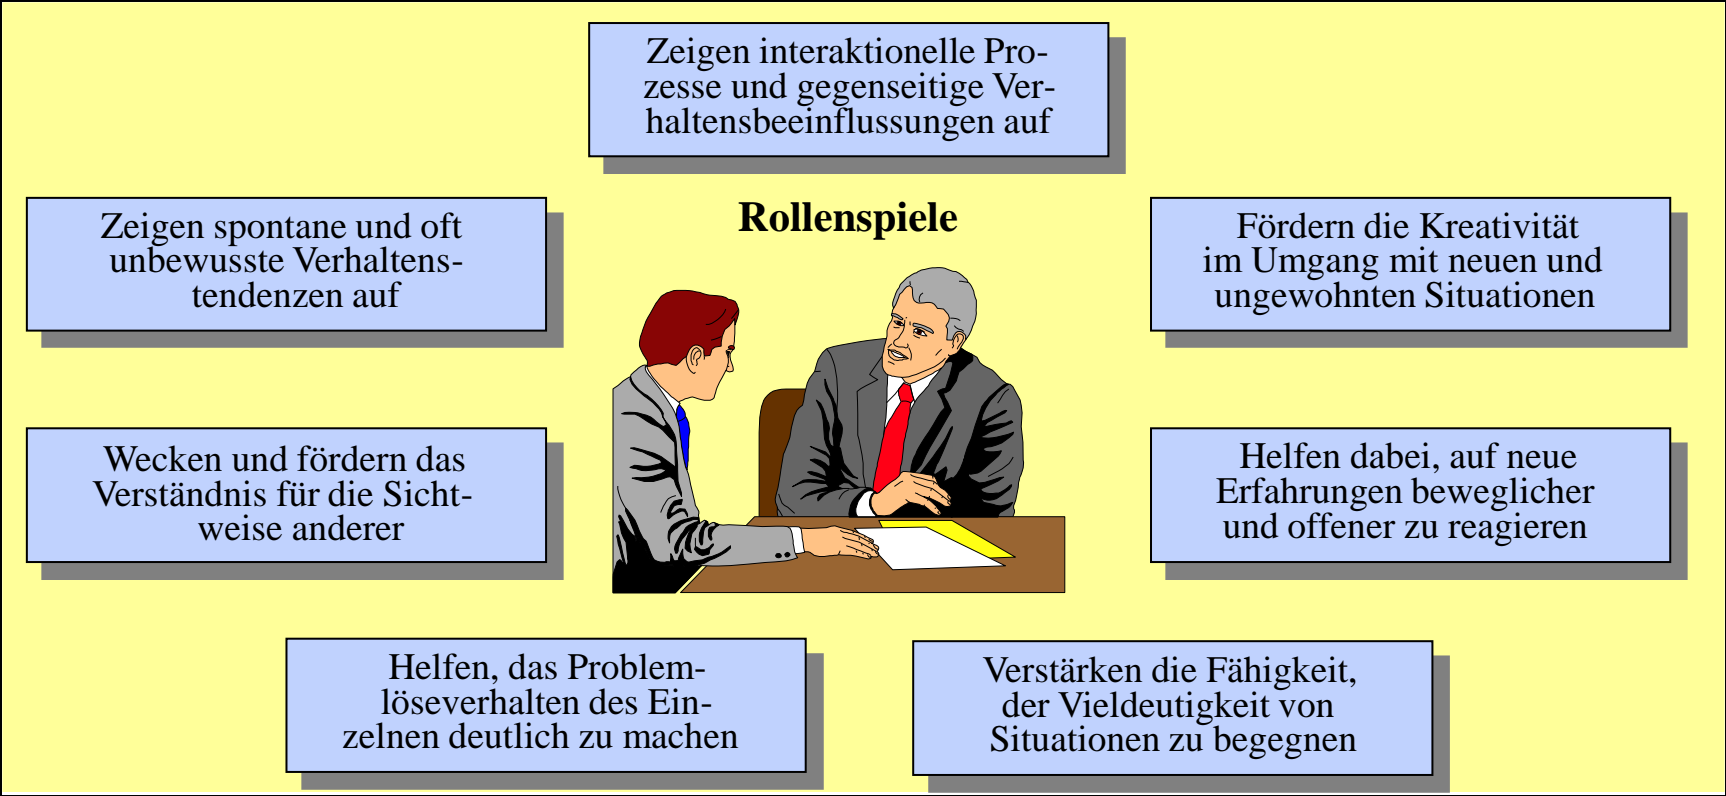

S. 294 Abb. 105



## 6. Planspiele

Planspiele sind auf der Praxis aufgebaute, computergestützte Modelle, mit deren Hilfe Entscheidungsprozesse im Laufe eines Seminars simuliert werden.

Die Spielregeln und die internen und externen Daten, die den Teilnehmern bei Beginn ausgehändigt werden, dienen als Grundlage für die Simulation einer möglichen Situation.

### **Vorteile:**

- Übungen von strategischen Planungen
- Förderung der Kooperation der Teilnehmer beim Treffen von Entscheidungen unter Zeitdruck
- Zielfindung und Entscheidungsfindung unter Risiko aus einer Vielzahl von Informationen und Alternativen
- Lernen aus den Ergebnissen, erkennen von Zusammenhängen und Auswirkungen unter Berücksichtigung der Entscheidungen der anderen Gruppen
- Komplexität der simulierten Situationen

### **Nachteile:**

- Durch die hohe Komplexität werden Einzelfragen nicht ausreichend berücksichtigt
- Annahmen im Modell entsprechen nicht immer den realistischen Marktgegebenheiten. Die daraus abgeleiteten Entscheidungen für die Realität können zu folgenschweren Fehlern führen.
- Das Modell zeigt nicht, dass die Entscheidungen in der Realität von den Erfahrungen der Entscheidungsträger abhängig sind.

## Vernetzung der Unternehmensbereiche im Planspiel

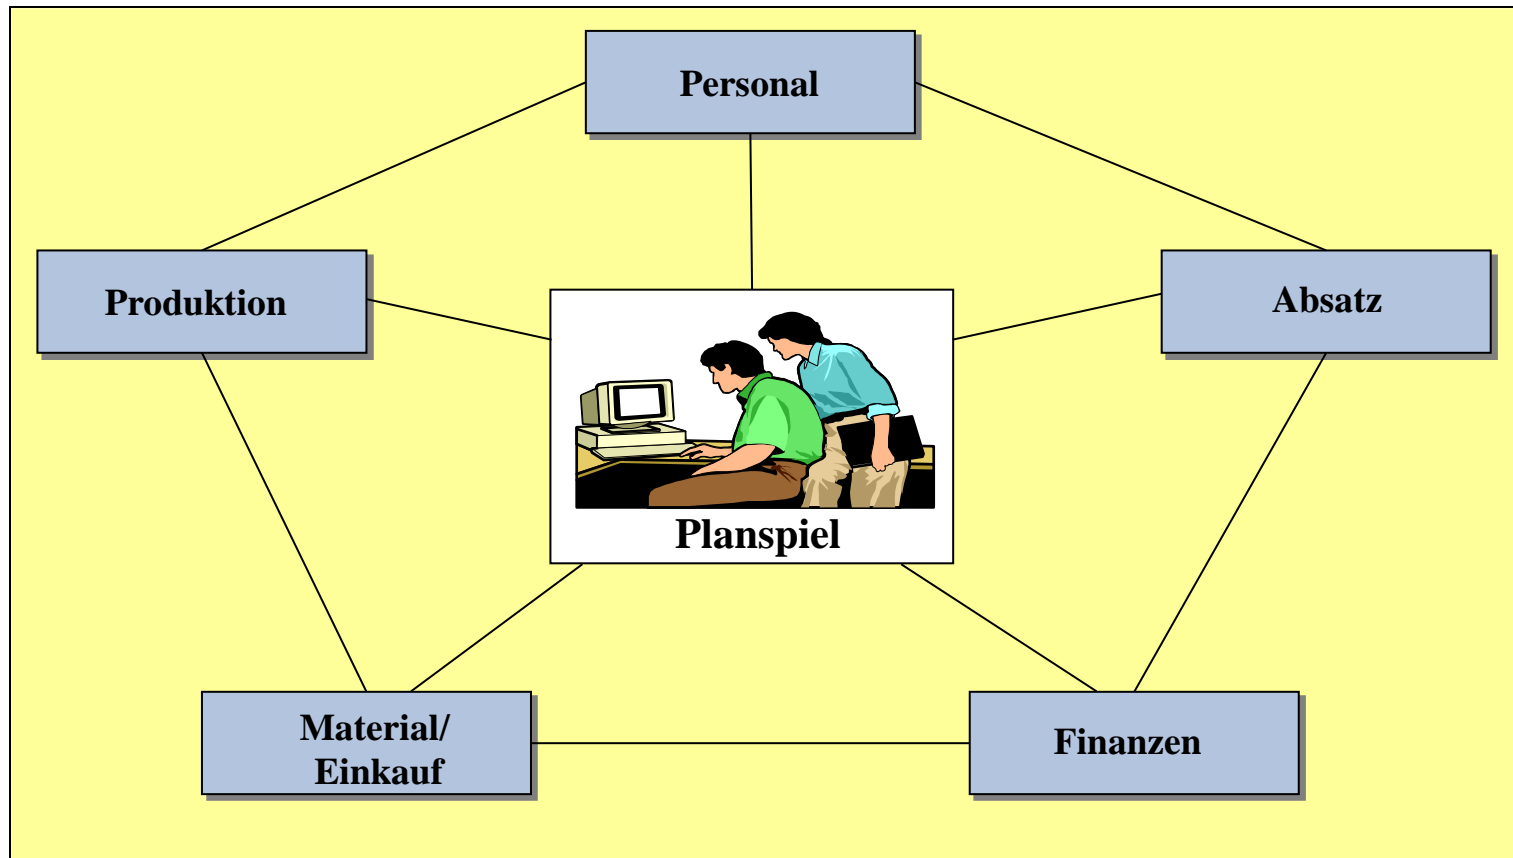

S. 295 Abb. 106

Jung, Hans: Personalwirtschaft, 9. Aufl., München 2010

© Oldenbourg Wissenschaftsverlag





## 7. Gruppendynamische Methoden

Sie besitzen den Zweck durch Selbsterfahrung die **Teamfähigkeit** der Teilnehmer zu **verbessern**.

Als Voraussetzungen gelten dabei eine erhöhte Einsicht des eigenen Verhaltens sowie mehr Einsicht an gruppendynamischen Prozessen und in die sozialpsychologischen Bedingungsfaktoren der Arbeitsweise von Teams.

Durch Führungsrivalitäten und Auseinandersetzungen soll dem Einzelnen bewusst werden, welche Wirkung er auf andere Gruppenmitglieder ausübt, welche Emotionen er bei anderen auslöst und wie er selbst auf Kritik reagiert.



## 8. Assessmentcenter

Im Rahmen der Personalentwicklung ist die Rückmeldephase von Bedeutung, die sich aus einem Feedbackgespräch und einem detaillierten Ergebnis – Gutachten zusammensetzt.

Durch konstruktive Kritik, die auf einem Stärken - Schwächen - Profil und der Potentialbeurteilung aufbaut, kann gemeinsam mit dem Teilnehmer ein langfristiges und individuelles Bildungskonzept erarbeitet werden.

## 9. Bildungsurlaub

ist als Freistellung von anderer Arbeit zum Zweck der Bildung unter Fortzahlung des Arbeitsentgeltes definiert.

Er soll der politischen und beruflichen Weiterbildung dienen und somit einen Beitrag zur Chancengleichheit leisten.

primäre Lernziele:

- Motivation zum Weiterlernen
- Befähigung zum Weiterlernen
- Praxisrelevanz durch Lernen erfahren



## 10. Förderkreise und Erfahrungsaustauschgruppen

Sie sind eine Sonderform der Bildung “off the job” und sind im Unterschied an andere Methoden in ihrem Ablauf nicht an bestimmte pädagogische Prinzipien gebunden.

Die Aufgabe dieser Gruppen bestehen darin, den Teilnehmern in regelmäßigen oder unregelmäßigen Abständen Gelegenheit zu geben, über bestimmte Probleme Erfahrungen und Meinungen auszutauschen.



## 11. Fernunterricht

Der Fernunterricht als Sonderform der Bildung wird in der Regel von betrieblichen Fernlehrinstituten durchgeführt, welche Privatpersonen oder Mitarbeitern unter finanzieller Beteiligung des Unternehmens, die Möglichkeit geben an bestimmten Fernkursen teilzunehmen.

Bei geeigneten Themenangeboten kann sich ein Betrieb die Organisation und Durchführung eigener Veranstaltungen sparen, was unter Kostenaspekten häufig günstiger ist.

## C. Neuerer Methoden der Personalentwicklung

### 1. Ablauf des suggestopädischen Trainings

- 1. Einführungsphase:** Entspannungsübung, Wiederholung, Präsentation des Themas, Zeitanteil: ca. 15 %
- 2. Kognitive Phase:** Erarbeiten und Verstehen der Inhalte, Zeitanteil: ca. 40 %
- 3. Rezeptive Phase:** Einprägen der Inhalte in entspanntem Zustand bei Musik, Zeitanteil: ca. 15 %
  - a) Aktiv - Konzert (Teilnehmer lesen mit)
  - b) Passiv - Konzert (Teilnehmer hören konzentriert mit)
- 4. Aktive Phase:** Anwendung des Stoffes, Zeitanteil: ca. 30 %

S. 298 Abb. 107

(in Anlehnung an: Jaehrling, D.: Effizienzsteigerung in der Personalentwicklung durch Suggestopädie? in: Strategien der Personalentwicklung, Hrsg. von Riekhof, H. C., 3. Aufl., Wiesbaden 1992, S. 413)

Jung, Hans: Personalwirtschaft, 9. Aufl., München 2010

© Oldenbourg Wissenschaftsverlag

## 2. Brain-Dominance-Konzept

Aufgaben und Denkmuster beider Gehirnhälften:

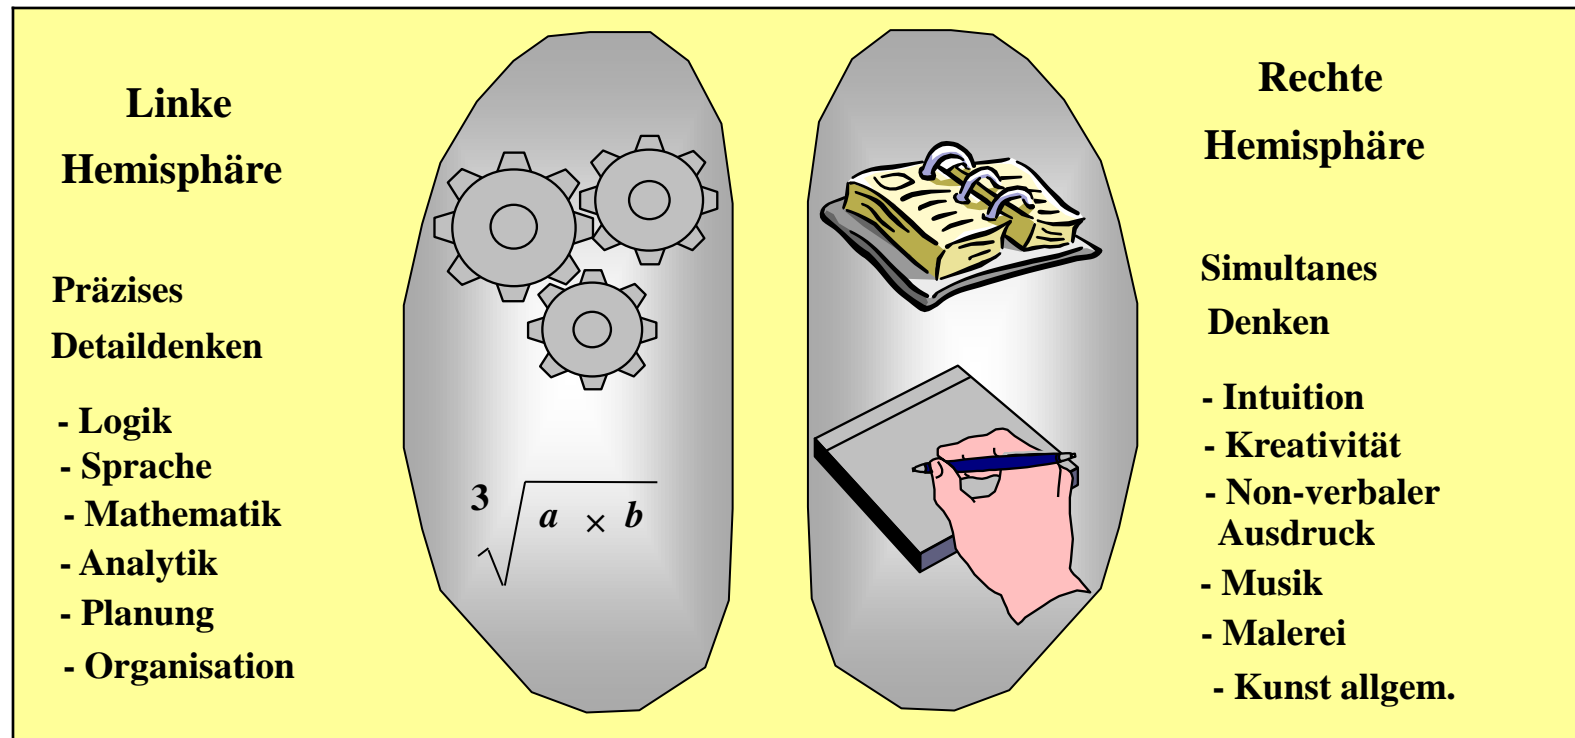



### 3. Workshop

#### Typische Inhalte:

- Erarbeitung von Zielsetzungen bzw. Einigung auf gemeinsame Zielvorstellungen in einem Bereich
- Entwicklung von Problemlösungen für Sachaufgaben und Kommunikationsprozesse
- Suchen und Finden neuer Ideen mit kreativen Arbeitsmethoden, Verfahren und Arbeitsabläufen
- Diagnose von Schwachstellen und Verbesserungsmöglichkeiten in der gegenwärtigen Arbeitssituation
- Umgang mit Konflikten (in und zwischen Bereichen)





## 4. E-Learning

### Einsatzmöglichkeiten bzw. Vorteile:

- zeit- und ortsungebundener Zugriff auf Wissen,
- Einsparungen von Reise- und Tagungskosten,
- Reduzierung der durchschnittlich benötigten Lernzeit,
- jeder Lernende arbeitet in seiner eigenen Geschwindigkeit,
- Förderung der Entwicklung einer Lern- und Arbeitskultur, die vom Lernenden selbst getragen und weiterentwickelt wird,
- Wissen wird in kleinen Häppchen vermittelt, dadurch ist die Aufmerksamkeit des Lernenden oft höher als bei klassischen Seminaren,
- individuelle Betreuung und effiziente Erfolgskontrolle durch z.B. Teletutoren.



## Umsetzung der Personalentwicklung

**Aus den Zielen, die das Unternehmen und die Mitarbeiter mit der Personalentwicklung verfolgen, lassen sich in erster Linie vier Hauptaufgaben ableiten:**

- Bestimmung der Entwicklungsziele
- Ermittlung des Entwicklungsbedarfes
- Bedarfsdeckung
- Kontrolle der Zielerreichung



## Planung der Personalentwicklung

### 1. Strategische Entwicklungsplanung:

- ist die Erstellung von grundsätzlichen Entwicklungszielen für den Zeitraum von 5 bis 10 Jahren
- Abstimmung der Entwicklungsziele mit der strategischen Zielsetzung des Unternehmens
- Ergebnis ist die Formulierung einer Bildungspolitik, die Aussagen über den Stellenwert der betrieblichen Weiterbildung , ihren Umfang und ihre grundsätzliche Gestaltung macht
- Bildungspolitik ist der Rahmen für alle weiteren Planungsstufen
- Absichtserklärung der Unternehmensführung und sollte in Form von Schulungsgrundsätzen formuliert werden.



## 2. Taktische Entwicklungsplanung:

- Konkretisierung des Bildungskonzeptes für den Zeitraum von 2 bis 4 Jahren
- Durchführende Schulungsmaßnahmen werden in Bereiche (z.B. Führungskräftebildung) untergliedert
- Mitarbeiter mit ähnlichen Schulungsbedürfnissen werden zu Gruppen zusammengefasst (z. B. Fachbereiche)
- danach wird entschieden, welche Maßnahmen für die jeweilige Gruppe angeboten werden
- Festlegung des zeitlichen Rahmen der Schulungsveranstaltung
- Ergebnis der taktischen Entwicklungsplanung wird übersichtlich in einem Schulungskonzept in Form einer Matrix festgehalten



### 3. Operative Entwicklungsplanung:

- stellt detaillierteste Planungsstufe dar
- Erstellung eines Jahresplan, der alle Schulungsmaßnahmen aus dem Schulungskonzept für das Planungsjahr weiter konkretisiert
- Lehrinhalte werden zusammen mit Angaben über Lernziele, Lernmethoden, Dauer und Termin der jeweiligen Veranstaltung in einem Schulungsprogramm festgehalten
- weitere Aufgabe ist Bestimmung der Zahl der Mitarbeiter, die an der jeweiligen Veranstaltung teilnehmen sollen
- Entscheidung, welche Mitarbeiter an welchen Schulungsmaßnahmen teilnehmen können, wird in Absprache mit dem einzelnen Mitarbeiter und dessen Vorgesetzten getroffen
- bei einer freiwilligen Teilnahme kann man eine besonders hohe Motivation des Mitarbeiters und damit die Chance, dass er wirklich etwas lernt, voraussetzen
- deshalb sollte man freiwillige Meldungen grundsätzlich entsprechen, falls nicht andere betriebliche Interessen dagegen sprechen



## Erfolgskontrolle der Personalentwicklung

### Die Kontrolle soll:

- ermitteln, ob das Ergebnis einer Bildungsmaßnahme der zugrunde liegenden Zielsetzung von Unternehmen und Teilnehmern gerecht wurde
- Feststellen, ob die gewünschte Qualifikationsänderung und Arbeitsplatzveränderung bei den Mitarbeitern tatsächlich eingetreten ist
- Organisatorische Hemmnisse beim Lerntransfer aufdecken und deren Beseitigung ermöglichen
- Die im jeweiligen Fall geeignetsten Lehr- bzw. Lernmethoden ermitteln und deren geplanten Ablauf überprüfen
- dazu beitragen, dass brauchbare Maßnahmen zur Verbesserung von Bildungsveranstaltungen erarbeitet werden können

## Methoden der Erfolgskontrolle

Dabei kann man zum einen eine

ökonomische,

zum anderen eine

pädagogische

Erfolgskontrolle durchführen.

## 1. Ökonomische Erfolgskontrolle:

-  Systematische Kontrolle der Kosten, die für Aus-, Fort- und Weiterbildung in einer Periode entstehen
-  Darauf aufbauende Wirtschaftlichkeitskontrollen für die Erstellung zukünftiger Bildungsbudgets und Vergleichsrechnungen für alternative Bildungsmaßnahmen
-  Verwendung von Schätzwerten für die Bestimmung von Alternativkosten, welche nicht genau erfasst werden können



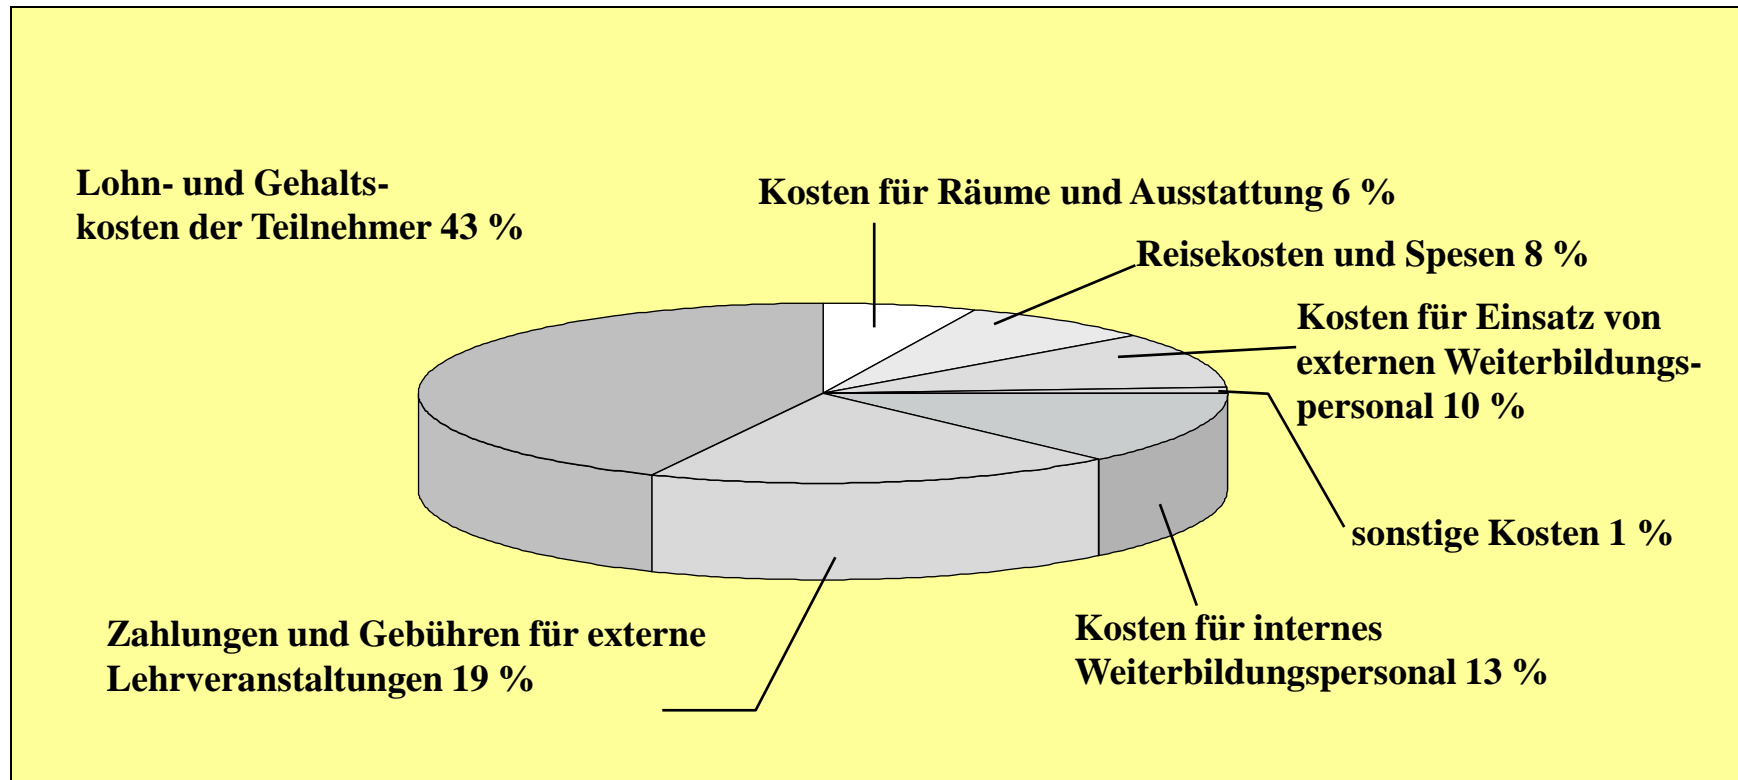

S. 303 Abb. 109

(in Anlehnung an: Jaehrling, D.: Effizienzsteigerung in der Personalentwicklung durch Suggestopädie? in: Strategien der Personalentwicklung, Hrsg. von Riekhof, H. C., 3. Aufl., Wiesbaden 1992, S. 413)

**Jung, Hans: Personalwirtschaft, 9. Aufl., München 2010**

© Oldenbourg Wissenschaftsverlag



## 2. Pädagogischen Erfolgskontrolle:

- ☒ Selbstkontrolle und Fremdkontrolle
- ☒ Objektive oder subjektive Kontrolle
- ☒ Direkte oder indirekte Kontrolle



Fragebogen zur Beurteilung einer Lehrveranstaltung

Bitte teilen Sie uns Ihre persönliche Meinung über die Lehrveranstaltung mit. Ihre Anregungen dienen zur Optimierung der Unterrichtsinhalte und -methoden und werden selbstverständlich vertraulich behandelt.

Bezeichnung des Seminars/der Veranstaltung: \_\_\_\_\_

I. Datum: \_\_\_\_\_  
Hat die Veranstaltung Ihre Erwartungen erfüllt? ☐ Ja ☐ Nein  
Wenn Nein, warum nicht? \_\_\_\_\_  
\_\_\_\_\_

|                                                     | ++                       | +                        | 0                        | -                        | --                       |
|-----------------------------------------------------|--------------------------|--------------------------|--------------------------|--------------------------|--------------------------|
| II. Wie beurteilen Sie die Veranstaltung insgesamt? | <input type="checkbox"/> |
| III. Wie beurteilen Sie den Referenten?             |                          |                          |                          |                          |                          |
| - Fachkompetenz                                     | <input type="checkbox"/> |
| - Didaktische Fähigkeiten                           | <input type="checkbox"/> |
| - Freundlichkeit, Hilfsbereitschaft                 | <input type="checkbox"/> |



(Fortsetzung)

|                                                      | ++                               | +                        | o                        | -                        | --                       |
|------------------------------------------------------|----------------------------------|--------------------------|--------------------------|--------------------------|--------------------------|
| IV. Wie beurteilen Sie die Veranstaltungsthematik?   |                                  |                          |                          |                          |                          |
| - Seminarinhalt                                      | <input type="checkbox"/>         | <input type="checkbox"/> | <input type="checkbox"/> | <input type="checkbox"/> | <input type="checkbox"/> |
| - Neue Erkenntnisse                                  | <input type="checkbox"/>         | <input type="checkbox"/> | <input type="checkbox"/> | <input type="checkbox"/> | <input type="checkbox"/> |
| - Praxisbezug                                        | <input type="checkbox"/>         | <input type="checkbox"/> | <input type="checkbox"/> | <input type="checkbox"/> | <input type="checkbox"/> |
| - Verständlichkeit                                   | <input type="checkbox"/>         | <input type="checkbox"/> | <input type="checkbox"/> | <input type="checkbox"/> | <input type="checkbox"/> |
| - Übungsteile                                        | <input type="checkbox"/>         | <input type="checkbox"/> | <input type="checkbox"/> | <input type="checkbox"/> | <input type="checkbox"/> |
| - Zusammenfassung                                    | <input type="checkbox"/>         | <input type="checkbox"/> | <input type="checkbox"/> | <input type="checkbox"/> | <input type="checkbox"/> |
| V. Wie beurteilen Sie die Arbeitsunterlagen?         | <input type="checkbox"/>         | <input type="checkbox"/> | <input type="checkbox"/> | <input type="checkbox"/> | <input type="checkbox"/> |
| VI. Wie beurteilen Sie die Organisation?             | <input type="checkbox"/>         | <input type="checkbox"/> | <input type="checkbox"/> | <input type="checkbox"/> | <input type="checkbox"/> |
| VII. Wie beurteilen Sie die Kursdauer?               | <input type="checkbox"/>         | zu kurz                  | <input type="checkbox"/> | richtig                  | <input type="checkbox"/> |
| VIII. Was haben Sie als besonders positiv empfunden? | <input type="checkbox"/> zu lang |                          |                          |                          |                          |
| <hr/>                                                |                                  |                          |                          |                          |                          |
| <hr/>                                                |                                  |                          |                          |                          |                          |
| IX. Was haben Sie als besonders negativ empfunden?   | <hr/>                            |                          |                          |                          |                          |
| <hr/>                                                |                                  |                          |                          |                          |                          |
| X. Können Sie die Veranstaltung weiterempfehlen?     | <input type="checkbox"/>         | ja                       | <input type="checkbox"/> | bedingt                  | <input type="checkbox"/> |
| XI. Anregungen, Bemerkungen:                         | <input type="checkbox"/> nein    |                          |                          |                          |                          |
| <hr/>                                                |                                  |                          |                          |                          |                          |
| <hr/>                                                |                                  |                          |                          |                          |                          |

S. 306 Abb. 110B



## Methoden der Erfolgskontrolle

### Direkte Erfolgsmessung am Arbeitsplatz:

- Verwendung von Anlernkarten
- Lernkurven weisen Leistungsgrad auf, der als Mengenleistung in Abhängigkeit von der Bildungsdauer definiert ist
- Vergleich der Kurve des Mitarbeiters mit der Idealvorgabe ermöglicht Aussage über den Bildungserfolg

### Erfolgsermittlung durch Betrachtung der betrieblichen Gesamtentwicklung:

- Betrachtung der Kennziffern wie Ausbringungsmenge, Umsatz, Herstellkosten etc.

### Kennziffern:

- Anwendung von Kennziffernverfahren



## Problemfelder der Personalentwicklung

- Transferlücke
- Entwicklungsunwillige Mitarbeiter
- Grenzen der Unternehmensstruktur
- Hierarchisch-statusbetonte Zielgruppenbildung
- Mitarbeiter als Investitionsobjekte
- Weiterbildung zuerst zum Nutzen der Unternehmung oder der Mitarbeiter
- Erfolgskontrolle

## 5. Personalfreisetzung

- 5.1 Ursachen der Personalfreisetzung
- 5.2 Rahmenbedingungen der Personalfreisetzung
- 5.3 Maßnahmen der Personalfreisetzung
- 5.4 Kündigung
- 5.5 Beendigung durch Firmeninsolvenz
- 5.6 Abwicklung und Kontrolle des Personalabbaus
- 5.7 Outplacement
- 5.8 Rechtliche Aspekte des Personalabbaus (Überblick)

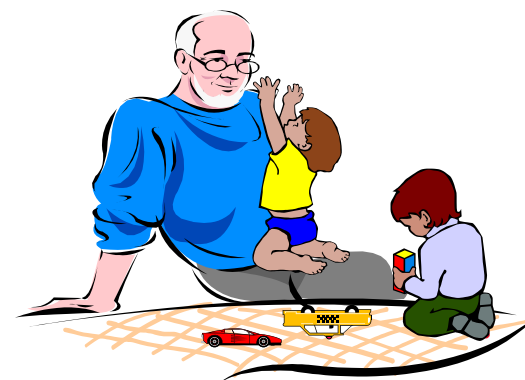



# Ursachen der Personalfreisetzung

## I. Unternehmensbedingte Ursachen

### unternehmensintern

- zunehmende Technisierung
- Reorganisationsprozesse
- Rationalisierungsprozesse
- Kozenzationsvorgänge

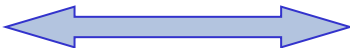

### unternehmensextern

- veränderte Umweltbedingungen
- Einführung neuer Technologien
- Bedarfsverschiebungen

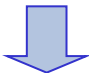

rückläufige  
Absatzentwicklung

## II. Mitarbeiterbezogene Ursachen

- mangelnde Fähigkeiten
- fehlende Integration

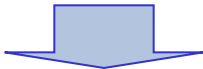

Neuorganisation des Personalbestandes

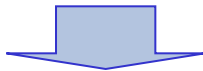

Personalfreisetzung





## Rahmenbedingungen der Personalfreisetzung

- Informationen und Daten müssen auf betrieblicher Ebene vorhanden sein und genutzt werden
- jede verantwortliche Personalplanung sollte auf arbeitsmarktbezogene Informationen eingehen
- Daten, die die einzelnen Unternehmensbereiche selbst liefern, müssen berücksichtigt werden
- Organisatorische Hilfsmittel sind bei der Planung des Personalabbaus sehr hilfreich
- Anfertigung einer Personalbestandsstatistik ist notwendig
- Information der Arbeitnehmervertretung ist grundsätzlich sehr wichtig
- Betriebsrat benötigt vollen Zugang zu Daten, Informationen und Unternehmensplänen
- Mitwirkung der Arbeitnehmervertretung im Aufsichtsrat
- Wirtschaftsausschuss tritt einmal im Monat zusammen

## Maßnahmen der Personalfreisetzung

In Abhängigkeit von Anlass, Ausmaß und zeitlicher Dauer können die Maßnahmen der Personalfreisetzung unterschieden werden in:

- **Maßnahmen der Produktions- und Absatzplanung**
- **Arbeitszeitverkürzende Maßnahmen**
- **Maßnahmen der indirekten Personalfreisetzung**
- **Maßnahmen der direkten Personalfreisetzung**

Daneben sind auch Maßnahmen der Qualifizierung von Mitarbeitern im Rahmen der Personalentwicklung sowie arbeitsgestaltende und arbeitsorganisatorische Maßnahmen von Bedeutung.

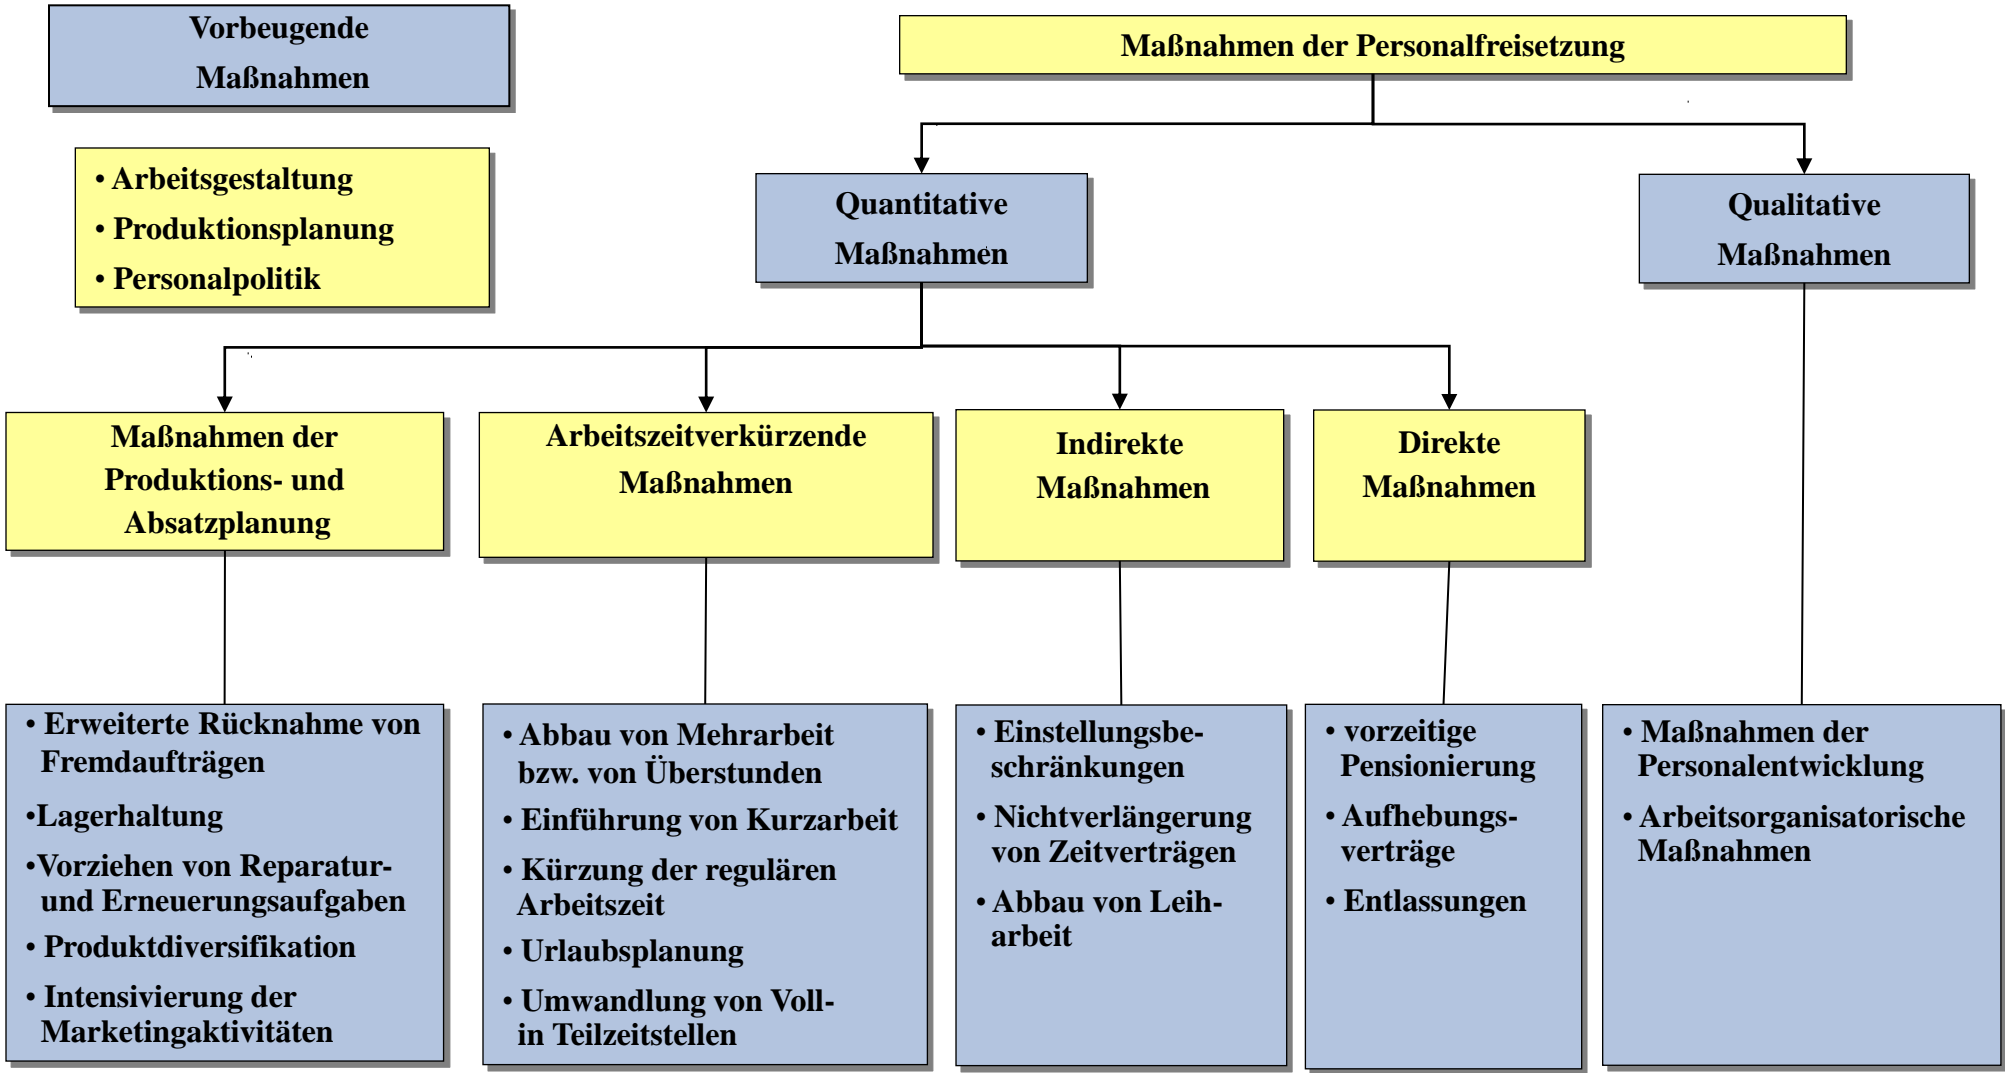

## Alternativen zur Personalfreisetzung

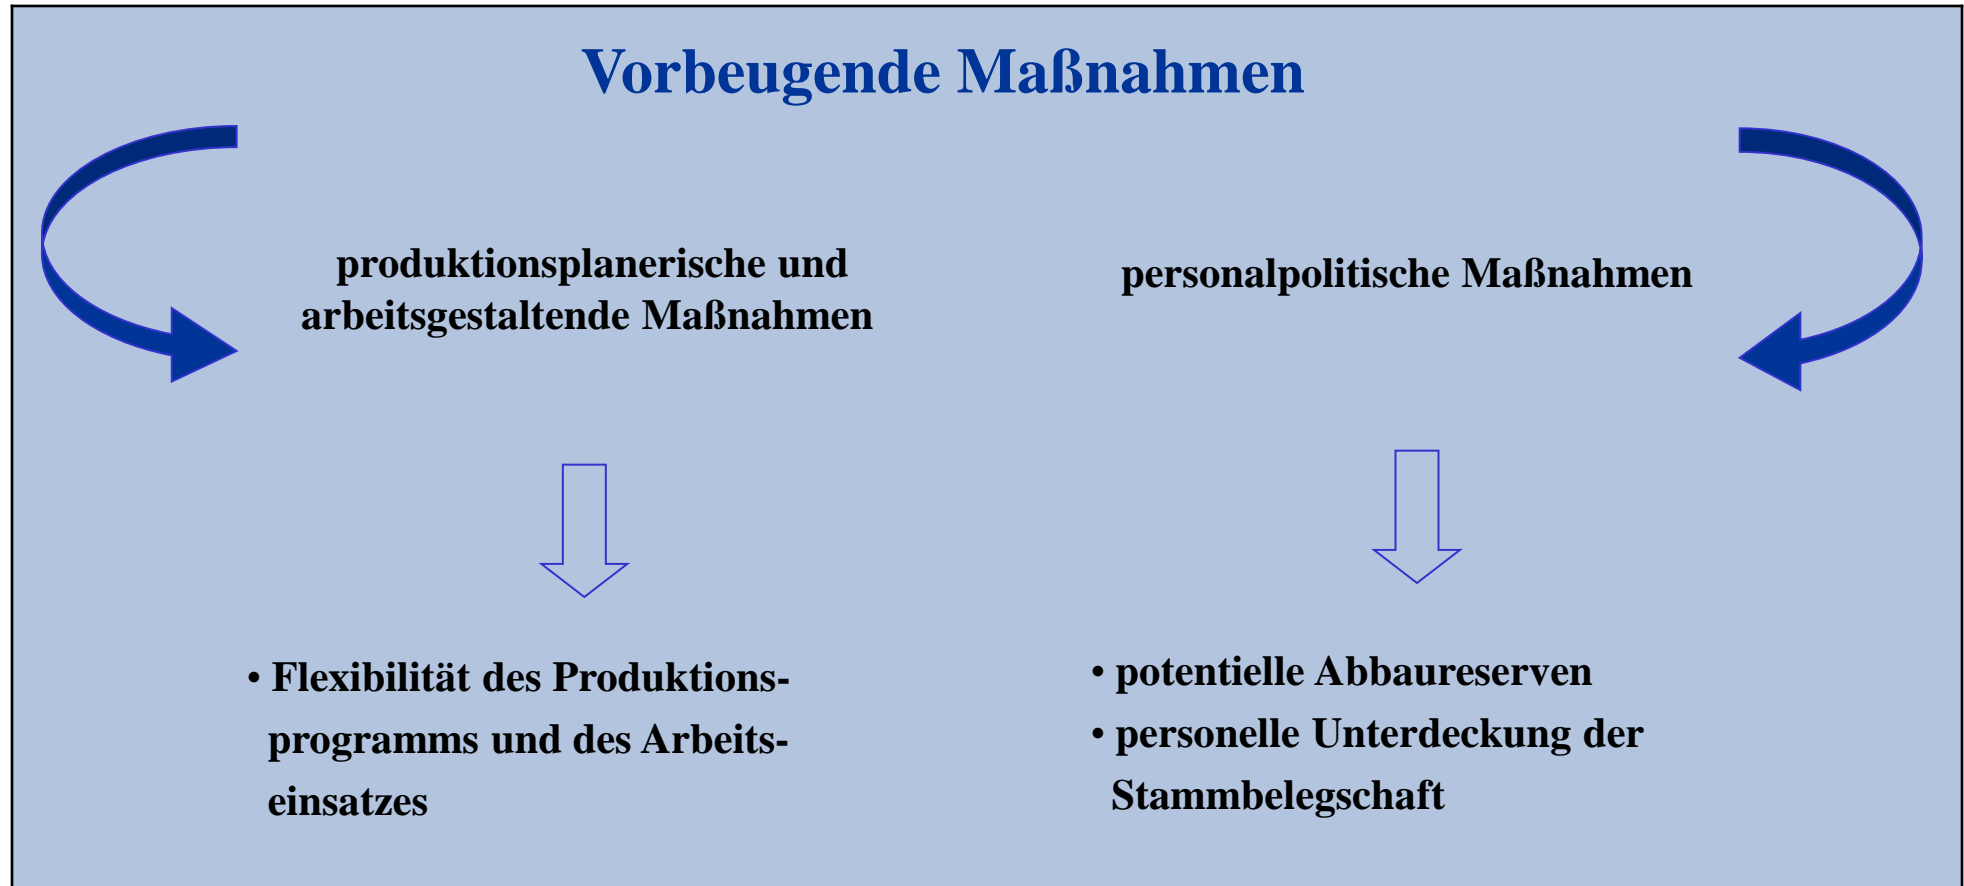



## **Maßnahmen der Produktions- und Absatzplanung**

- Erweiterte Lagerhaltung
- Rücknahme von Fremdaufträgen
- Vorziehen von Reparatur- und Erneuerungsaufgaben
- Produktdiversifikation und -streuung
- Intensivierung der Marketingaktivitäten



## Arbeitszeitverkürzende Maßnahmen

Möglichkeiten im Rahmen der Arbeitszeitplanung, die einen direkten Personalabbau verhindern helfen:

- **Abbau von Mehrarbeit und Überstunden**
- **Einführung von Kurzarbeit**
- **Kürzung der regulären Arbeitszeit**
- **Urlaubsplanung und -abwicklung**
- **Umwandlung von Vollzeit- in Teilzeitstellen**

# Entwicklung der tariflichen Wochenarbeitszeit in der Metallindustrie (in Stunden)

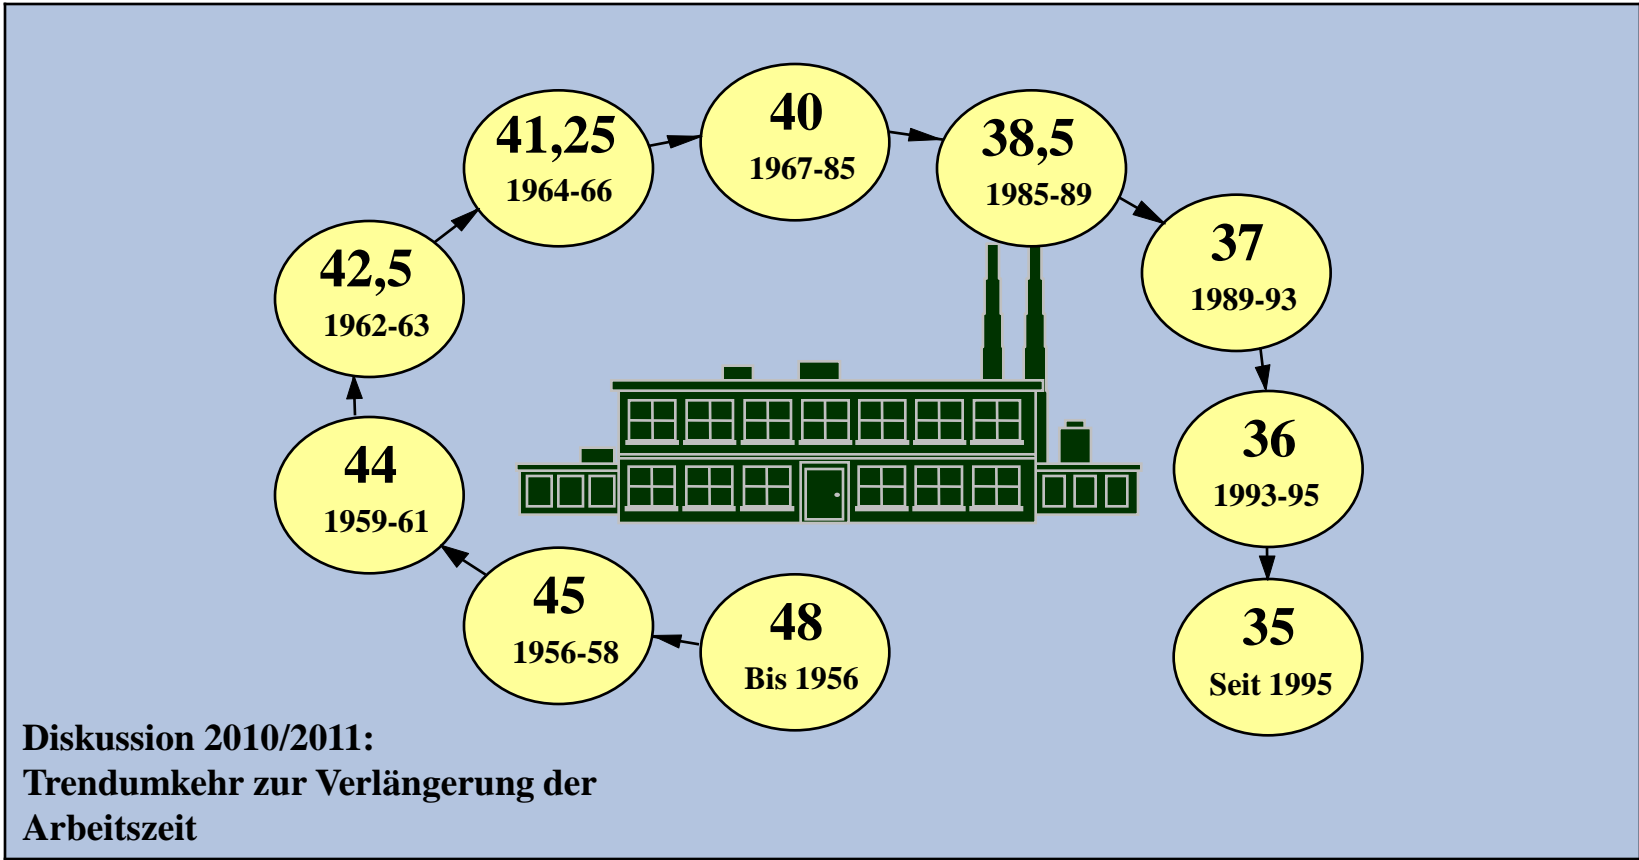

## Maßnahmen der indirekten Personalfreisetzung

- Einstellungsbeschränkungen
- Nichtverlängerung von Zeitverträgen
- Abbau von Leiharbeit

Es entstehen bei jeder Maßnahme Zielkonflikte zwischen:

- möglichst geringen Kosten
- möglichst geringen sozialen Härten
- einer möglichen Umgehung nachteiliger Wirkungen für das Unternehmen





## Maßnahmen der direkten Personalfreisetzung

Ist das Ausmaß des Personalüberhangs so groß, dass Maßnahmen des indirekten Personalabbaus nicht mehr ausreichen, um den Personalbestand den betrieblichen Erfordernissen anpassen zu können, so muss ein Unternehmen zu einem direkten Personalabbau übergehen.

- Altersteilzeit bzw. vorzeitige Pensionierung
- Aufhebungsverträge
- Entlassungen

# Kündigung

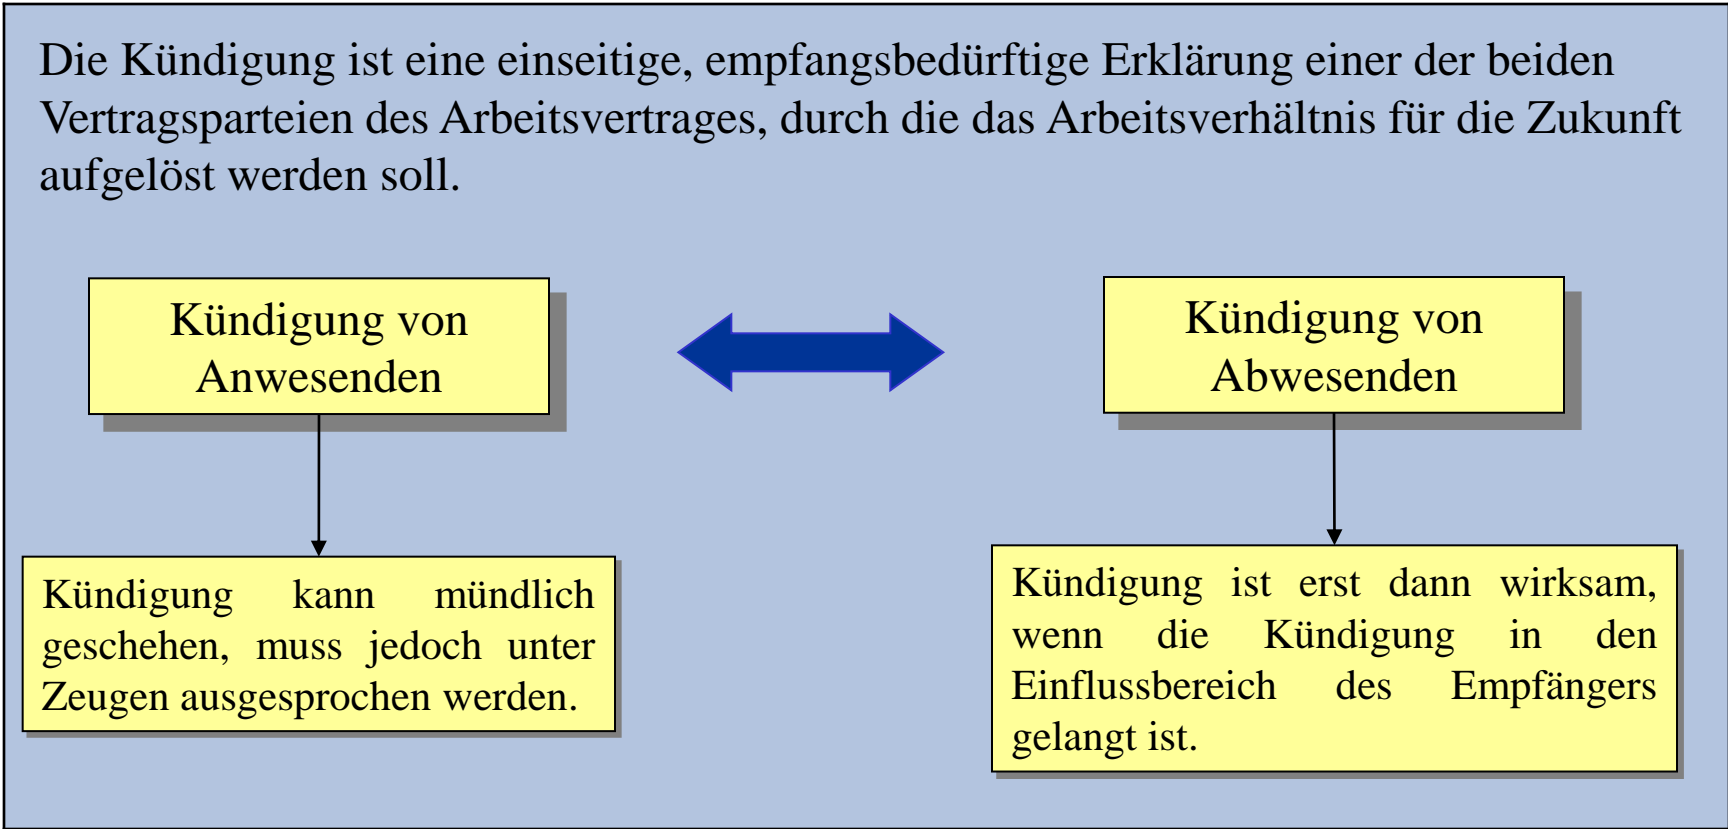

S. 327 f.

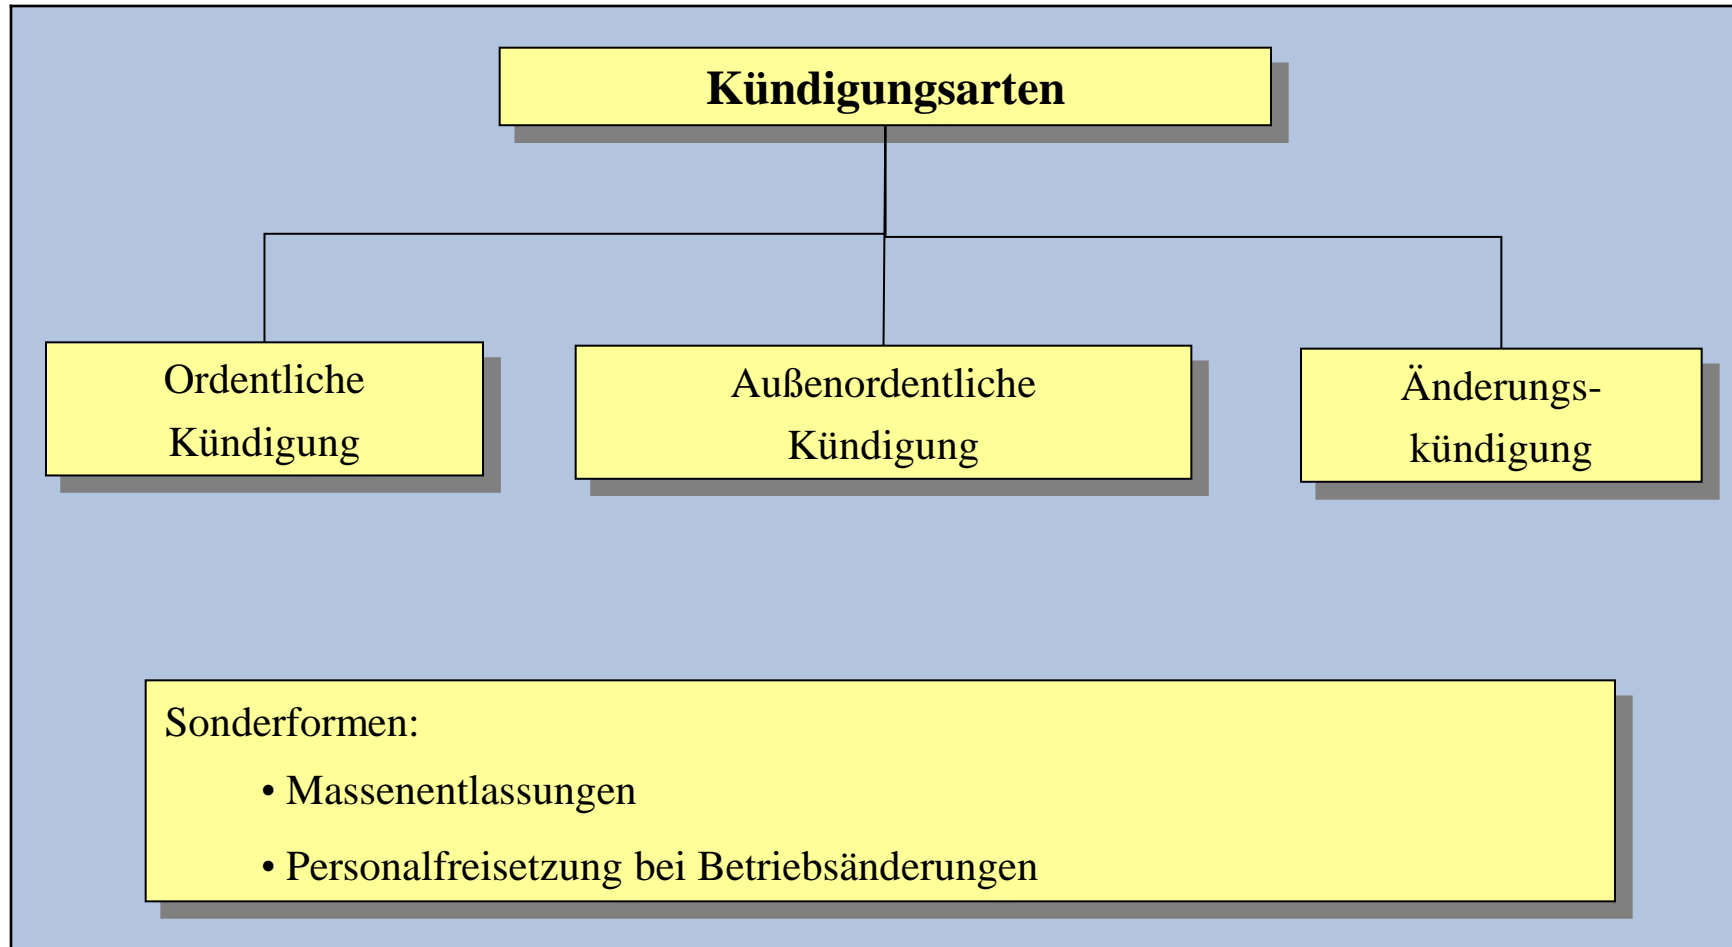

## Ordentliche Kündigung

Eine **ordentliche Kündigung** ist eine Kündigung, die zu ihrer Wirksamkeit keines sachlichen Grundes bedarf, wenn sie durch den Arbeitnehmer ausgesprochen wurde.

Bei Kündigung durch den Arbeitgeber bedarf sie einem Grund gemäß Kündigungsschutzgesetz.

**Eine Kündigung ist gemäß §1 KschG sozial ungerechtfertigt wenn:**

- keine dringende betriebliche Erfordernisse vorliegen
- Kündigung in der Person oder im Verhalten des AN nicht begründet werden kann
- Kündigung gegen eine rechtliche Richtlinie verstößt
- Arbeitnehmer an einen anderen Arbeitsplatz derselben Firma versetzt werden kann

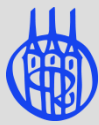

## Gesetzliche Kündigungsfristen

| Dauer des Arbeitsverhältnisses (mind.) | Kündigungsfrist bei Kündigung durch den Arbeitgeber |
|----------------------------------------|-----------------------------------------------------|
| zwei Jahre                             | ein Monat zum Ende eines Kalendermonats             |
| fünf Jahre                             | zwei Monate zum Ende eines Kalendermonats           |
| acht Jahre                             | drei Monate zum Ende eines Kalendermonats           |
| zehn Jahre                             | vier Monate zum Ende eines Kalendermonats           |
| zwölf Jahre                            | fünf Monate zum Ende eines Kalendermonats           |
| fünfzehn Jahre                         | sechs Monate zum Ende eines Kalendermonats          |
| zwanzig Jahre                          | sieben Monate zum Ende eines Kalendermonats         |

S. 329 Abb. 114

## Kündigungsgründe

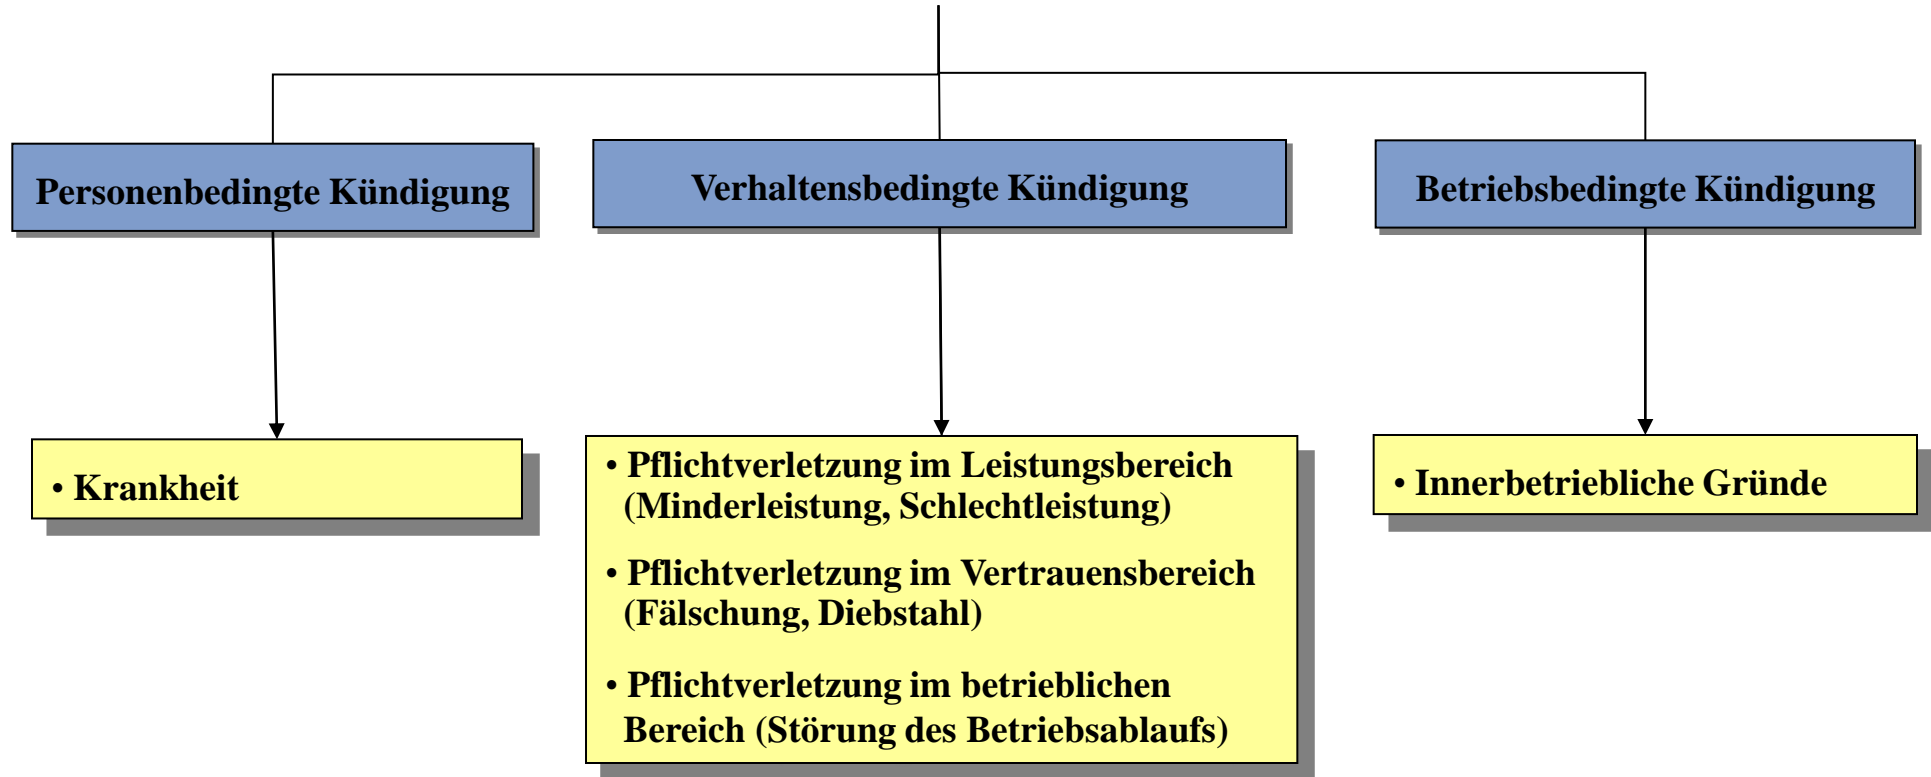



## Gerichtliche Prüfung bei personenbedingter Kündigungen

### **Gerichtliche Prüfung dieser Kündigungen erfolgt in 3 Stufen:**

1. Zum Zeitpunkt der Kündigung ist immer eine negative Prognose hinsichtlich des Gesundheitszustandes des Arbeitnehmers erforderlich.
2. Die entstandenen und prognostizierten Fehlzeiten müssen zu einer erheblichen Beeinträchtigung der betrieblichen Interessen führen.
3. In der dritten Stufe erfolgt die Interessenabwägung, wobei zu klären ist, ob die erhebliche Beeinträchtigung zu einer unzumutbaren Belastung des Arbeitgebers führt.



## Zu Beeinträchtigungen und Belastungen des Arbeitgebers zählen:

- Wesentliche Störungen im Arbeitsablauf
- Produktionsausfall
- Verlust von Kundenaufträgen
- Nichtbeschaffbares Ersatzpersonal
- Außerordentlich hohe Lohnfortzahlungskosten



## Punktetabelle zur sozialen Auswahl (BAG 1990)

### I. Dauer der Betriebszugehörigkeit:

bis 10 Dienstjahre:

je Jahr 1 Punkt

ab dem 11. Dienstjahr:

je Jahr 2 Punkte

Es werden nur Zeiten der Betriebszugehörigkeit bis zum vollendeten 55. Lebensjahr berücksichtigt (d.h. es können maximal 70 Punkte erreicht werden).

### II. Lebensalter

für jedes volle Jahr:

1 Punkt (maximal 55 Punkte)

### III. Unterhaltsverpflichtungen/ Familienstand

verheiratet:

8 Punkte

je unterhaltsberechtigtes Kind:

4 Punkte

Schwerbehinderung bis 50 GdB:

5 Punkte

über 10 GdB für je 10 weitere GdB:

1 Punkt

Die endgültige Auswahl erfolgt unter Abwägung weiterer, oben nicht genannter Gesichtspunkte.

Dabei kommen insbesondere in Betracht:

- besondere Lasten aus Unterhaltsverpflichtungen
- besondere Pflegebedürftigkeit
- besondere Gründe, die einer Arbeitsvermittlung entgegenstehen
- Alleinverdiener



## Außerordentliche (fristlose) Kündigung

Die **außerordentliche Kündigung**, die in der Regel eine fristlose Kündigung ist, ist sowohl für Arbeitsverhältnisse auf bestimmte Zeit als auch für unbefristete Arbeitsverhältnisse möglich.

Falls der Kündigende dennoch eine gewisse Frist einräumt, muss er darauf besonders hinweisen, um den Eindruck einer ordentlichen Kündigung zu vermeiden.

## Kündigungsgründe einer außerordentlichen Kündigung

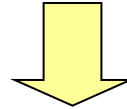

**Voraussetzung: Wichtiger Grund!**

**Wichtige Gründe, die die Fortsetzung des Arbeitsverhältnis für den Arbeitgeber unzumutbar machen, können sein:**

- Anstellungsbetrug
- Dauernde oder anhaltende Arbeitsunfähigkeit
- Beharrliche Arbeitsverweigerung oder Arbeitsvertragsbruch
- Grobe Verletzung der Treuepflicht und Verstöße gegen das Wettbewerbsverbot

## Kündigungsschutz bei außerordentlicher Kündigung

Arbeitnehmer, die unter den Geltungsbereich des Kündigungsschutzgesetzes fallen, können die Unwirksamkeit einer außerordentlichen Kündigung.

-genauso wie die Sozialwidrigkeit einer ordentlichen Kündigung-

Nur durch Klage vor dem Arbeitsgericht innerhalb von drei Wochen nach Zugang der Kündigung geltend machen.

Die Regelungen über die Auflösung des Arbeitsverhältnisses gegen Zahlung einer Abfindung gelten auch für die außerordentliche (fristlose) Kündigung, jedoch kann hier nicht der Arbeitgeber, sondern nur der Arbeitnehmer den Auflösungsantrag stellen.



## Änderungskündigung

Bei einer **Änderungskündigung** werden **einzelne Arbeitsbedingungen**, die im Arbeitsvertrag **festgelegt** wurden, geändert. Falls der Kündigungsempfänger diese Änderungen nicht annimmt, ist der gesamte Arbeitsvertrag beendet.

Falls Änderungskündigungen vom Arbeitgeber ausgesprochen werden, unterliegen sie den Vorschriften des **Kündigungsschutzgesetzes (§ 2 KSchG)**.

## Beispiel für eine Änderungskündigung

### Änderungskündigung

Sehr geehrte Frau Tsomiakos,

unter Bezugnahme auf das am 02.03.2009 mit Ihnen geführte Gespräch, in dem wir Ihnen die anhaltend schlechte Auftragslage im Bereich Textilmaschinen geschildert haben, kündigen wir den zwischen Ihnen und uns bestehenden Arbeitsvertrag fristgerecht zum 15.04.2009.

Zugleich bieten wir Ihnen an, das Arbeitsverhältnis mit uns ab dem 15.04.2009 unter folgenden geänderten Bedingungen fortzusetzen:

Sie werden als Montagearbeiterin in der Abteilung Vormontage Werkzeugmaschinen tätig. Ihr Arbeitsbereich umfasst die Vormontage von Steuerungsbauteilen.

Ihr Lohn/ Gehalt beträgt ab dem 15.04.2009 ..... €.

Im übrigen sollen die bisherigen Bedingungen unverändert weitergelten.

Bitte lassen Sie uns bis zum Ablauf der Kündigungsfrist, spätestens aber bis zum Ablauf von 3 Wochen nach Zugang dieses Schreibens, wissen, ob Sie das Arbeitsverhältnis zu den neuen Bedingungen fortsetzen.

Wenn Sie dies nicht wünschen, endet das Arbeitsverhältnis mit Ablauf der Kündigungsfrist.

Der Betriebsrat hat der Änderungskündigung nicht widersprochen und der Versetzung zugestimmt. (Im Falle eines Widerspruchs des Betriebsrates gegen die Änderungskündigung: "Die Stellungnahme des Betriebsrates fügen wir bei.")

Herne, den 10.03.2009

\_\_\_\_\_  
(Unterschrift)

## Kündigungsschutzklage bei Änderungskündigungen

Bei **Änderungskündigungen** kann der Arbeitnehmer innerhalb von drei Wochen nach Zugang vor dem Arbeitsgericht klagen.

Wird die Kündigungsschutzklage nicht rechtzeitig erhoben, gilt die Änderungskündigung als von Anfang an wirksam, es sein denn, der Mitarbeiter weist gemäß § 5 I KSchG besondere Gründe vor.

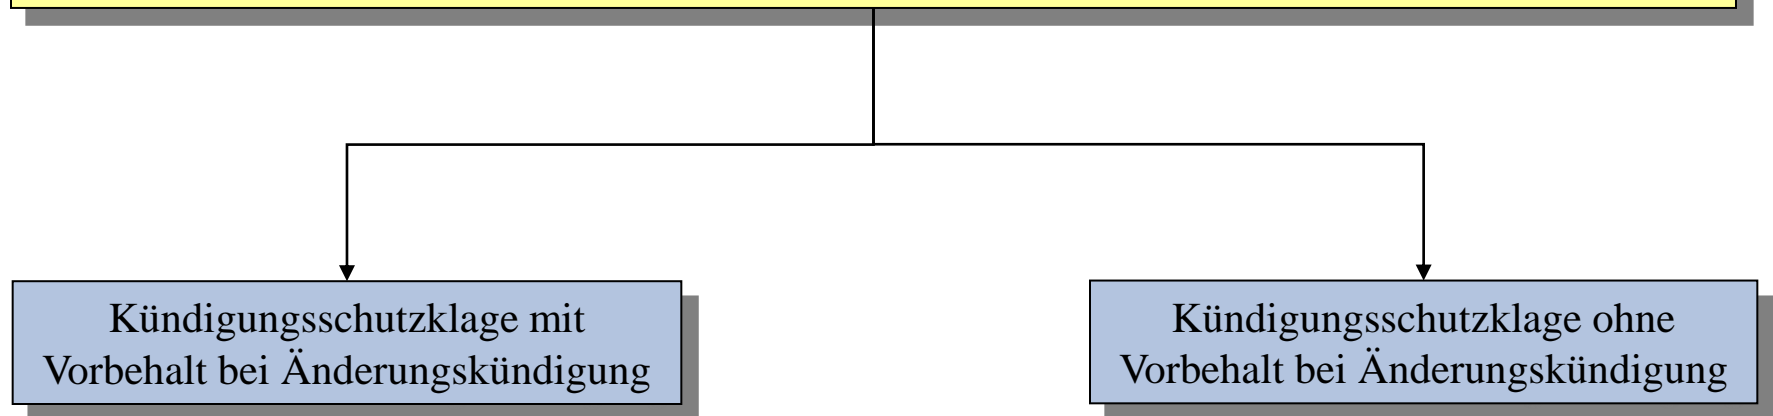



## Soziale Auswahl bei Änderungskündigungen

Bei der Änderungskündigung ist die soziale Situation des Arbeitnehmers zu berücksichtigen, da durch die angebotenen neuen Arbeitsbedingungen eine schwerere Belastung des Arbeitnehmers auftritt.

### Einfluss auf diese Belastung haben z. B.:

- Vorbildung
- persönliche Eigenschaften (schnelle Auffassungsgabe, Anpassungsfähigkeit etc.)
- Gesundheitszustand





## Abmahnung

Die Abmahnung ist die missbilligende Äußerung des Arbeitgebers oder Arbeitnehmers bei Verstößen des Vertragspartners gegen Haupt- oder Nebenpflichten aus dem Einzelarbeitsvertrag mit dem unmissverständlichen Hinweis, dass im Wiederholungsfalle der Inhalt oder der Bestand des Arbeitsverhältnisses gefährdet ist.

Es ist jedoch nicht erforderlich, bestimmte kündigungsrechtliche Maßnahmen (z.B. die ordentliche oder außerordentliche Beendigungs- oder Änderungskündigung) anzudrohen.

Bei der Abmahnung ist weiter erforderlich, dass ein genau bezeichnetes Fehlverhalten gerügt wird, mit der Aufforderung, das Verhalten zu ändern.

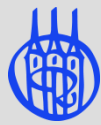

Beispiel für eine Abmahnung

Abmahnung

Sehr geehrte Frau Schneider,  
leider sind Sie trotz einer mündlichen Ermahnung durch Ihren Vorgesetzten, Herrn Schmitz, gemäß Ihrer Stempelkarte im Monat April 2010 an folgenden Tagen erst zu den aufgeführten Uhrzeiten an Ihrem Arbeitsplatz eingetroffen.

7.04.: 08.40 Uhr                      13.04.: 09.55 Uhr                      17.04.: 08.05 Uhr

Aufgrund Ihres Arbeitsvertrages sind Sie jedoch verpflichtet, arbeitstäglich pünktlich um sieben Uhr am Arbeitsplatz zu sein. Auf Befragen haben Sie Ihrem Vorgesetzten gegenüber erklärt, Sie hätten an den aufgeführten Tagen verschlafen.

Wir fordern Sie deshalb auf, die Arbeitszeit in Zukunft pünktlich einzuhalten. Bei erneuter schuldhafter Unpünktlichkeit müssen wir zu unserem Bedauern die Kündigung Ihres Arbeitsverhältnisses in Betracht ziehen.

\_\_\_\_\_, den \_\_\_\_\_ (Unterschrift)

Ich bestätige den Erhalt der Abmahnung und erkläre, dass ich gegen ihren Inhalt in tat-sächlicher Hinsicht keine Einwendungen habe.

\_\_\_\_\_, den \_\_\_\_\_ (Unterschrift)

## Gesetzliche Anforderungen und Aspekte bei der Abmahnung

Um die Rechtsgültigkeit der Abmahnung im juristischen Sinne gewährleisten zu können, sind folgende Aspekte zu berücksichtigen:

- Inhaltliche Form
- Zugang und Kenntnisnahme der Abmahnung
- Einzuhaltenden Fristen
- Abmahnungsberechtigten Personen
- Klagerecht des Arbeitnehmers
- Entfernung der Abmahnung aus der Personalakte

- Gerichtliche Überprüfung
- Wiederholte Abmahnung
- Abmahnung und Probearbeitsverhältnis
- Information und Mitbestimmung des Betriebsrates
- Beweislast bei Abmahnungen
- Abmahnung und Kündigung

## Gründe für eine Abmahnung

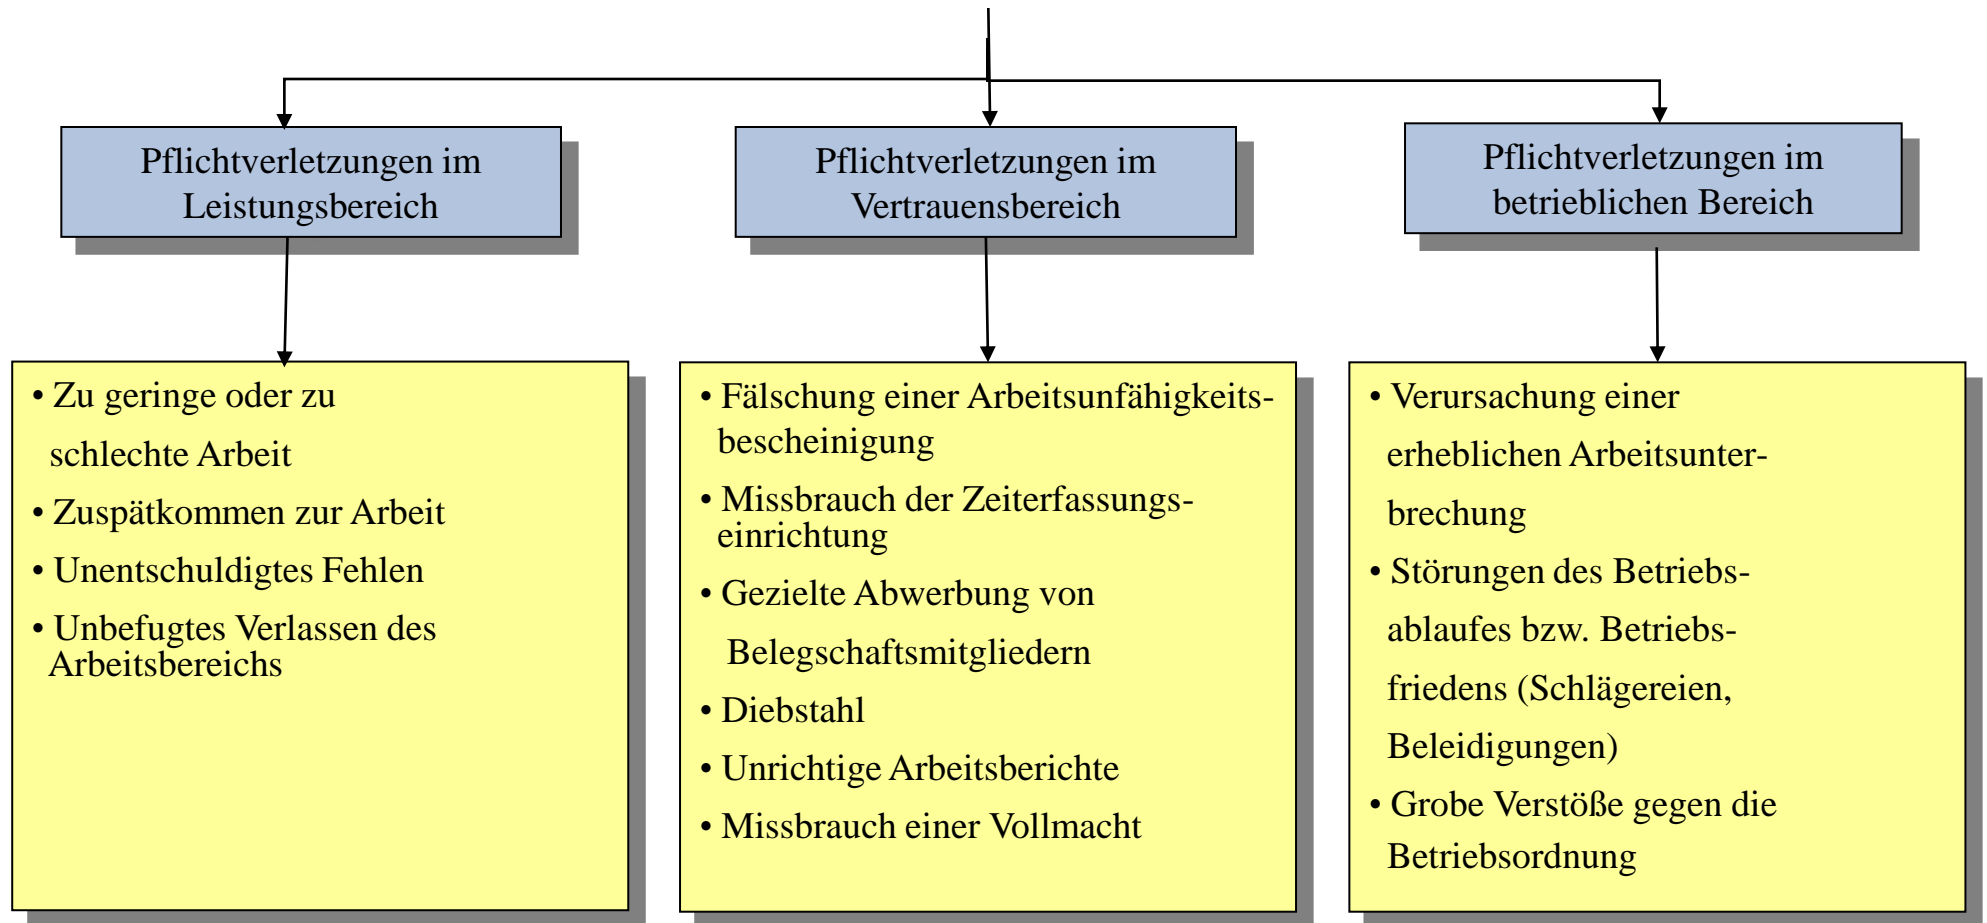

S. 344 f.



## Beteiligung des Betriebsrates bei der Kündigung

In allen Betrieben, in denen ein **Betriebsrat** besteht, ist dieser vor jeder Kündigung durch den Arbeitgeber zu hören.

Ohne vorherige Anhörung des Betriebsrates ist eine Kündigung durch den Arbeitgeber, unabhängig davon, ob es sich um eine ordentliche, außerordentliche oder Änderungskündigung handelt, unwirksam.

### Der Arbeitgeber hat dem Betriebsrat bei der Anhörung folgende Informationen mitzuteilen:

- Person, die gekündigt werden soll
- Art der Kündigung (ordentliche/außerordentliche Kündigung)
- Gegebenenfalls auch Kündigungstermin
- Gründe für die Kündigung

## Formblatt zur Anhörung des Betriebsrates vor einer Kündigung

|                                                                                                                                                                                                                                                                                                     |             |                                  |
|-----------------------------------------------------------------------------------------------------------------------------------------------------------------------------------------------------------------------------------------------------------------------------------------------------|-------------|----------------------------------|
| An den Betriebsrat                                                                                                                                                                                                                                                                                  | <i>oder</i> | An den Personalausschuss         |
| z. Hd. des Betriebsratsvorsitzenden                                                                                                                                                                                                                                                                 |             | z. Hd. des Ausschussvorsitzenden |
| <br>                                                                                                                                                                                                                                                                                                |             |                                  |
| Die Firma beabsichtigt, Herrn/ Frau                                                                                                                                                                                                                                                                 |             |                                  |
| Name, Vorname, Pers.-Nr.: _____                                                                                                                                                                                                                                                                     |             |                                  |
| Geburtsdatum, -ort: _____                                                                                                                                                                                                                                                                           |             |                                  |
| Straße, Hausnummer: _____                                                                                                                                                                                                                                                                           |             |                                  |
| Postleitzahl, Wohnort: _____                                                                                                                                                                                                                                                                        |             |                                  |
| Familienstand:                      ledig      verheiratet      geschieden      verwitwet                                                                                                                                                                                                           |             |                                  |
| Zahl der unterhaltspflichtigen Kinder: _____                                                                                                                                                                                                                                                        |             |                                  |
| Am _____                                                                                                                                                                                                                                                                                            |             |                                  |
| O ordentlich                                                                                                                                                                                                                                                                                        |             |                                  |
| O außerordentlich und hilfsweise ordentlich                                                                                                                                                                                                                                                         |             |                                  |
| O für den Fall der Nichtannahme der Vertragsänderung ordentlich                                                                                                                                                                                                                                     |             |                                  |
| zu kündigen.                                                                                                                                                                                                                                                                                        |             |                                  |
| Der/ Die zu Kündigende ist seit dem _____ als _____                                                                                                                                                                                                                                                 |             |                                  |
| zuletzt in der Abteilung _____ beschäftigt.                                                                                                                                                                                                                                                         |             |                                  |
| Die Kündigung ist erforderlich, weil _____                                                                                                                                                                                                                                                          |             |                                  |
| <br>                                                                                                                                                                                                                                                                                                |             |                                  |
| Der Betriebsrat wird gebeten, der Kündigung zuzustimmen. Für den Fall, dass der Betriebsrat nicht zustimmt, wird er gebeten, im Falle einer außerordentlichen Kündigung binnen 3 Tagen, einer ordentlichen Kündigung binnen einer Woche schriftlich seine Bedenken gegen die Kündigung mitzuteilen. |             |                                  |

S. 346 Abb. 118



## Widerspruch durch den Betriebsrat (ordentliche Kündigung)

Bei folgenden gesetzlich zugelassenen Gründen (§ 102, Abs. 3 BetrVG) kann der Betriebsrat innerhalb einer Woche bei ordentlicher Kündigung schriftlich widersprechen:

- Arbeitgeber hat soziale Gründe nicht oder nicht ausreichend berücksichtigt
- Kündigung verstößt gegen Richtlinien, die zwischen Arbeitgeber und Betriebsrat vereinbart worden sind
- Der zu kündigende Arbeitnehmer kann an einem anderen Arbeitsplatz im selben Betrieb beschäftigt werden
- Weiterbeschäftigung ist nach zumutbaren Umschulungs- oder Fortbildungsmaßnahmen möglich
- Weiterbeschäftigung unter geänderten Vertragsbedingungen ist möglich und Arbeitnehmer hat sein Einverständnis erklärt



## Kündigungsschutzklage

**Bei einer Kündigungsschutzklage muss der Arbeitnehmer innerhalb von 3 Wochen nach Zugang der Kündigung Kündigungsschutzklage gegen den Arbeitgeber vor dem Arbeitsgericht erheben.**

- (1) Weiterbeschäftigung während eines Kündigungsschutzprozesses
- (2) Lohnzahlung bei unwirksamer Kündigung
- (3) Auflösung des Arbeitsverhältnisses gegen Abfindung



## Besonderer Kündigungsschutz

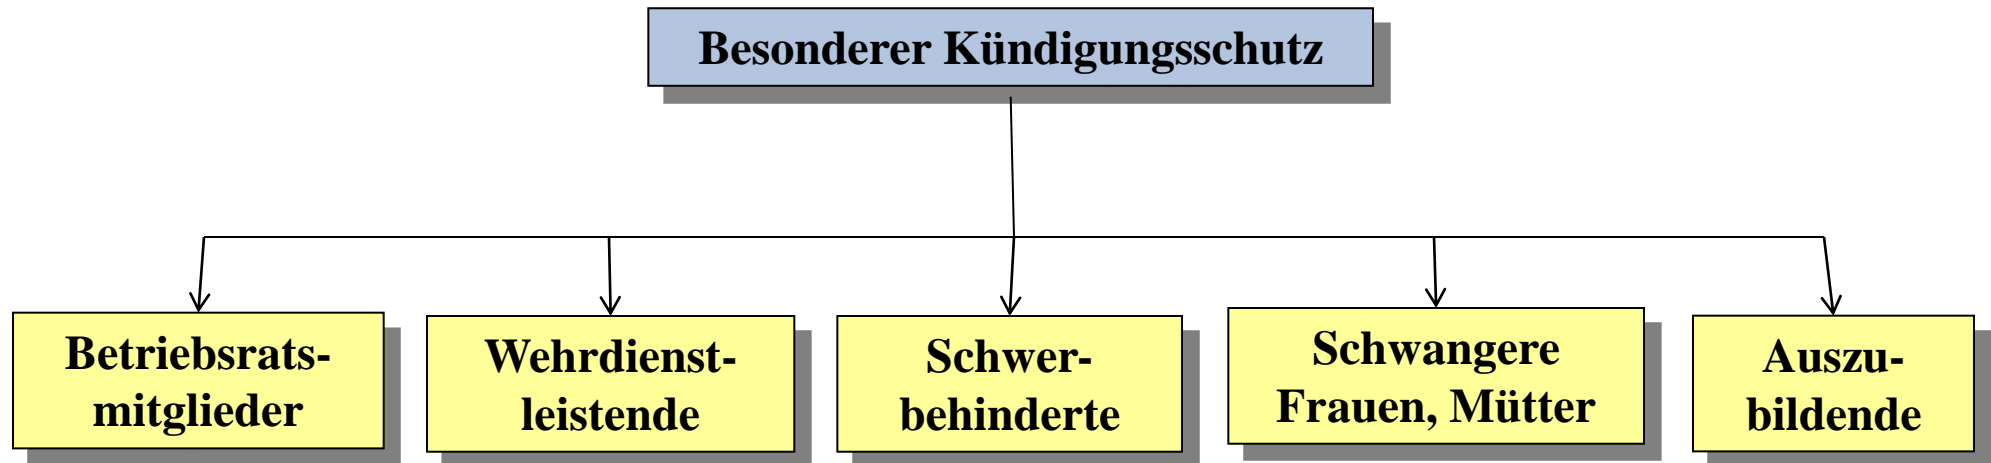



Massenentlassungen

Bei sogenannten Massenentlassungen besteht eine Anzeigepflicht, damit die Agentur für Arbeit tätig werden kann.

Eine Massenentlassung liegt vor, wenn folgende Bedingungen gegeben sind:

| Betriebsgröße<br>(Arbeitnehmer) | Entlassungen von mehr als ... Arbeitnehmern innerhalb<br>von 4 Wochen |
|---------------------------------|-----------------------------------------------------------------------|
| 21 – 59                         | 5                                                                     |
| 60 – 499                        | 10%, aber mind. 25                                                    |
| Über 499                        | 30                                                                    |

S. 352 f. Abb. 120



## Anzeigepflicht von Massenentlassungen beim Betriebsrat

Der Arbeitgeber, der anzeigepflichtige Entlassungen vornehmen will, hat den Betriebsrat rechtzeitig über:

- Gründe für die Entlassungen
- Zahl der zu entlassenden Arbeitnehmer
- vorgesehenen Entlassungszeitraum

schriftlich zu unterrichten.



## Personalfreisetzung bei Betriebsänderungen

**Von Betriebsänderungen spricht man gemäß § 111 BetrVG bei:**

- Einschränkungen und Stilllegungen des ganzen Betriebes oder von wesentlichen Betriebsteilen
- Verlegung des ganzen Betriebes oder von wesentlichen Betriebsteilen
- Zusammenschluss mit anderen Betrieben
- grundlegenden Änderungen der Betriebsorganisation, des Betriebszwecks oder der Betriebsanlagen
- Einführung grundlegend neuer Arbeitsmethoden und Fertigungsverfahren

## Verfahrensschema für den Interessenausgleich

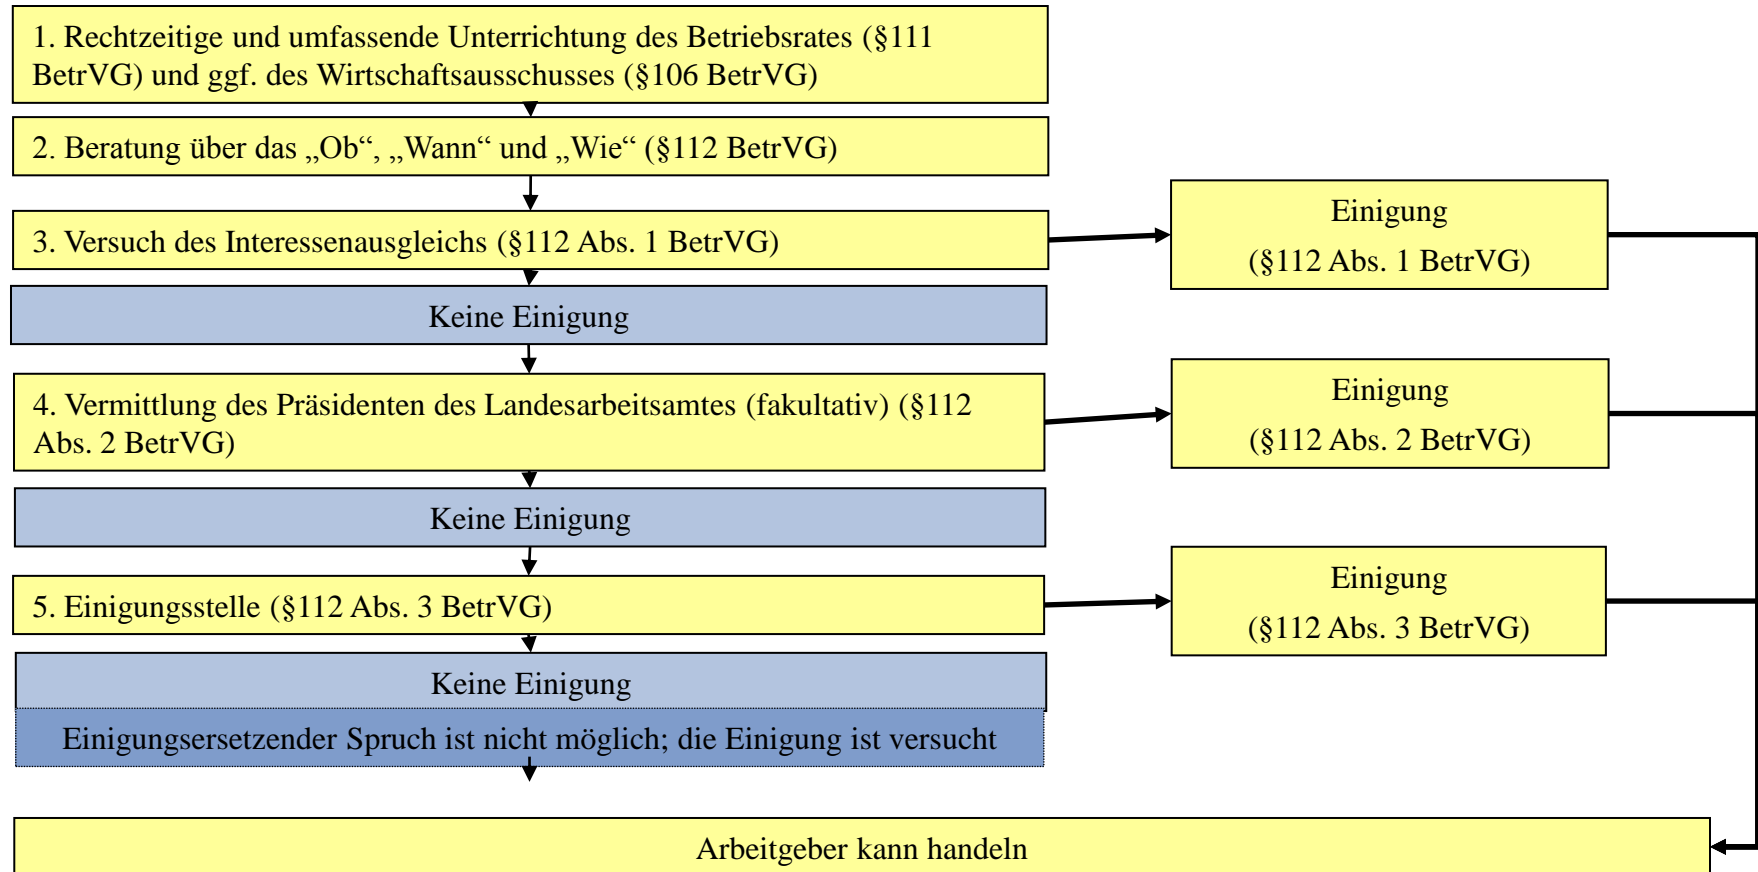

S. 354 Abb. 121  
(in Anlehnung an: Löwisch, M.: Arbeitsrecht, 7. Aufl., Düsseldorf 1991, S. 201 f.)



## Der Sozialplan

Grundsätzlich sollten folgende Punkte zu den Regelungstatbeständen eines **Sozialplans** gehören:

- Geltungsbereich (örtlich, sachlich, persönlich, zeitlich)
- Umsetzung (innerhalb des Betriebes oder Werksbereiches) ohne oder mit Entgeltminderung
- Versetzung
- Umschulung oder Fortbildung
- Entlassung

## Outplacement

Aus Mitarbeitersicht sollte **Outplacement** die Durchführung von ordnungsmäßigen Entlassungen in einer Form ermöglichen, die:

- bei der Bewältigung psychisch-sozialer Spannungen beim Betroffenen hilft
- bei Auswahl und Aufbau von Kontakten unterstützt und bei einer gezielten Bewerbungskampagne hilfreich ist
- die Arbeitsplatzsuche noch in der ungekündigten Stellung durch systematische Karriereplanung fördert



Aus Sicht des Unternehmens besteht die Zielsetzung des Outplacements darin:

- den Trennungsprozess zu verkürzen und arbeitsrechtliche Auseinandersetzungen zu vermeiden
- die Motivation der im Unternehmen verbleibenden Mitarbeiter zu erhalten
- unternehmensextern ein positives Personalimage aufzubauen
- dem verantwortlichen Vorgesetzten die Angst und Unsicherheit bezüglich der Durchführung von Kündigungsgesprächen zu nehmen



## Rechtliche Aspekte des Personalabbaus

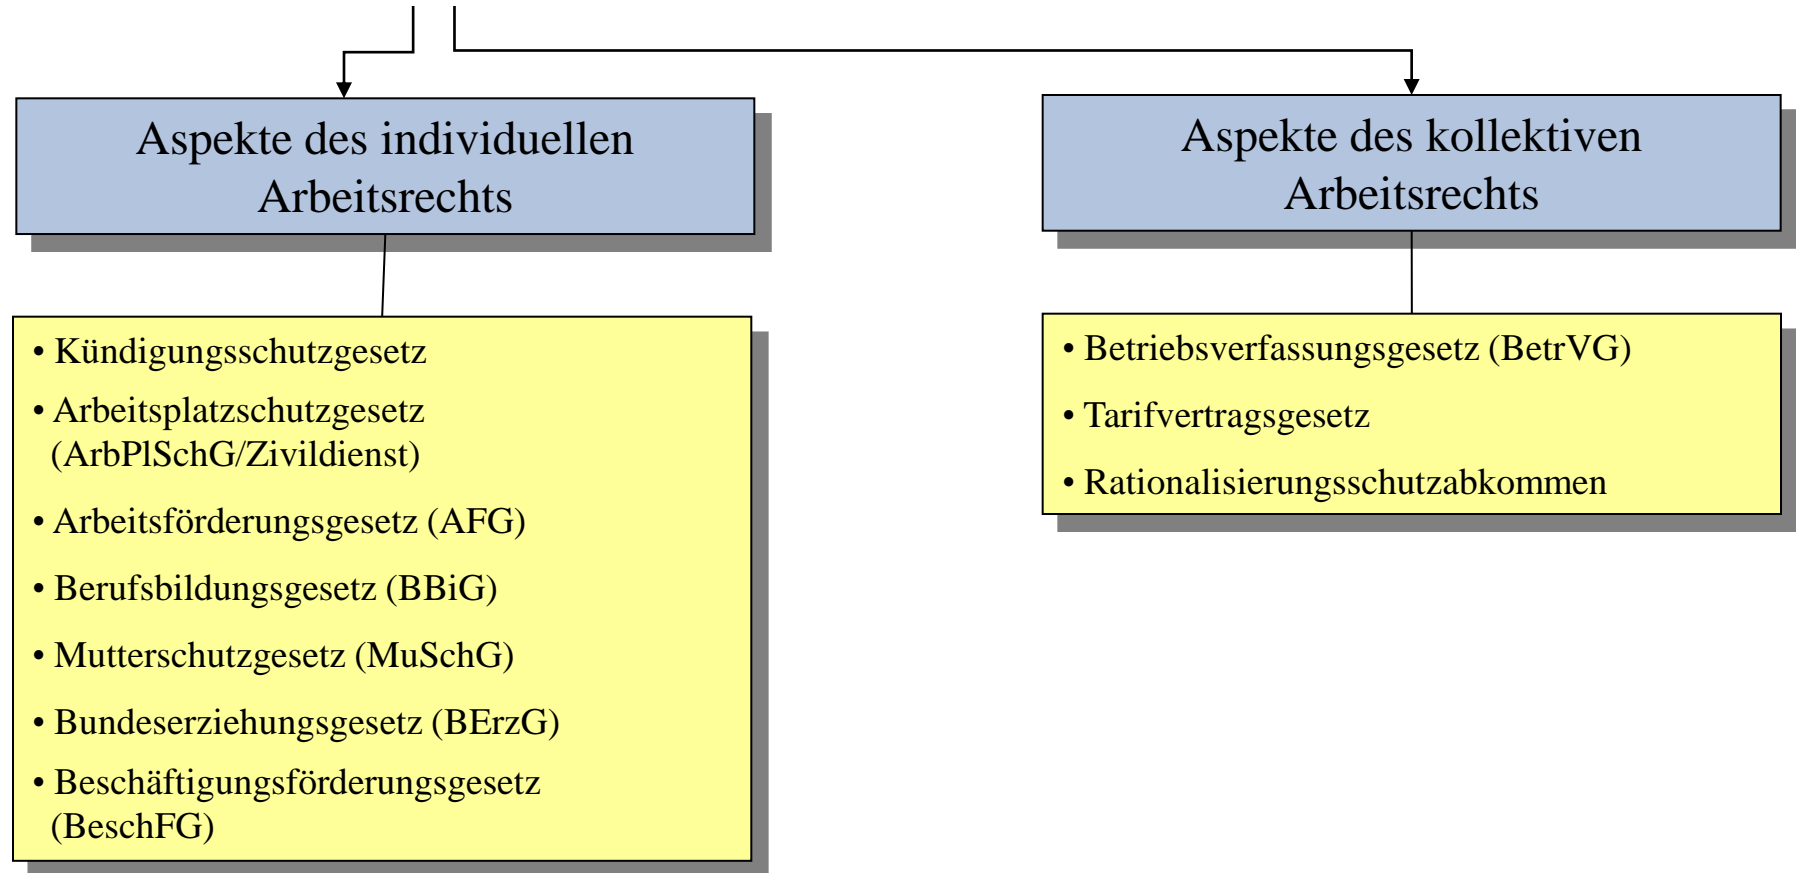



## Tarifvertragsgesetz

Die Bestimmungen tarifvertraglicher Vereinbarungen sind im Rahmen des Personalabbaus wichtig hinsichtlich:

- Kurzarbeit (Ankündigungsfristen, Beschränkung der Kürzung der regelmäßigen Arbeitszeit)
- Verdienstsicherung bei Versetzungen
- Verdienstsicherung und Unkündbarkeit älterer Arbeitnehmer
- Quantitative und qualitative Bezugsvorschriften (vorzugsweise für Fachkräfte)
- Abfindungsregelungen bei Entlassungen und sonstigen Bestimmungen des Rationalisierungsschutzes

# **Einflussmöglichkeiten des Betriebsrates auf den Personalabbau**

| BetrVG    | Bedeutsame Tatbestände                                                | Zuständigkeit nach dem Betriebsverfassungsgesetz |             | Ziel der Beratungen und Verhandlungen                                 |
|-----------|-----------------------------------------------------------------------|--------------------------------------------------|-------------|-----------------------------------------------------------------------|
| § 90      | Veränderungen in den Arbeitsbedingungen und -anforderungen            | Betriebsrat                                      | Arbeitgeber | Beratung über Konsequenzen für Arbeitsgestaltg. u. Personalpolitik    |
| § 92      | Personalbedarfs- und -entwicklungsplanung, Personalabbau              | Betriebsrat                                      | Arbeitgeber | Alternativen bzw. sozial befriedigende Lösung des Personalabbaus      |
| § 106     | Wirtsch. und technische Plandaten sowie deren personelle Auswirkungen | Wirtschaftsausschuss                             | Unternehmer | Umfassende Inf. und Beratung über Auswirkungen auf d. Personalplanung |
| § 87      | Verteilung und Veränderung der Arbeitszeit                            | Betriebsrat                                      | Arbeitgeber | Mitbestimmung bei Mehr- bzw. Kurzarbeit                               |
| § 102     | Entlassungen                                                          | Betriebsrat                                      | Arbeitgeber | Anhörungs- und Widerspruchsrecht des Betriebsrates                    |
| §§ 96/ 98 | Berufliche Weiterbildung                                              | Betriebsrat                                      | Arbeitgeber | Weiterbeschäftigung anstelle von Entlassungen                         |
| § 111     | Betriebsänderungen mit wesentl. Nachteilen für die Belegschaft        | Betriebsrat                                      | Unternehmer | Interessenausgleich, Sozialplan (§§ 112, 112a, 113)                   |

S. 361 Abb. 122



## **Notizen**
