# Supplementary material
Source: publisher site journal article supplement (https://www.degruyterbrill.com/publication/isbn/9783486719048/downloadAsset/9783486719048_Folien--de.zip)
Supplement: Supplementary file 3 [file 9783486719048_Folien--de.zip]

# Teil A

## Grundlagen der Personalwirtschaft

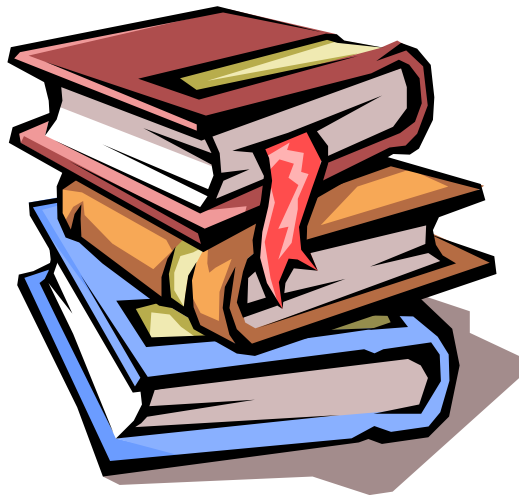

Januar 2011

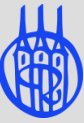

# Inhaltsverzeichnis

- 1 Einführung in die Personalwirtschaft**
- 2 Organisation der Personalwirtschaft**
- 3 Rechtsgrundlagen der Personalwirtschaft**

# 1. Einführung in die Personalwirtschaft

- 1.1 Historischer Überblick – Theorieansätze
- 1.2 Grundbegriffe
- 1.3 Objekte und Träger der Personalwirtschaft
- 1.4 Das Zielsystem der Personalwirtschaft
- 1.5 Der personalwirtschaftliche Entscheidungsprozess
- 1.6 Die Personalpolitik
- 1.7 Wissenschaftliche Einordnung

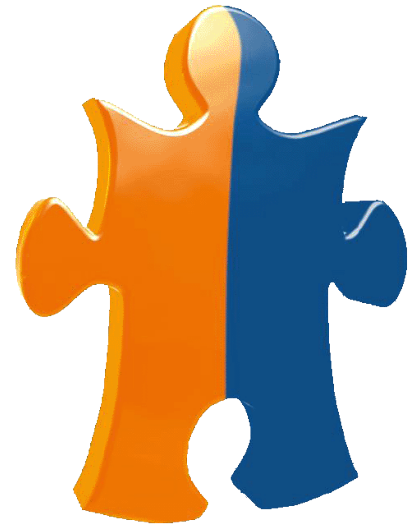

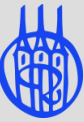

## Theorieansätze der Personalwirtschaft

- **Produktionsfaktoransatz (Gutenberg, E.)**
- **Entscheidungsorientierter Ansatz (Heinen, E.)**
- **Systemansatz (Ulrich, H)**
- **Konfliktorientierter Ansatz (Marr R./Stitzel, M)**
- **Kontingenz- bzw. situativer Ansatz (Fiedler, F. E.)**



## **Entwicklungsphasen der betrieblichen Personalwirtschaft**

- **die Verwaltungsphase (bis etwa 1950)**
- **die Anerkennungsphase (1950-1970)**
- **die Integrationsphase (seit 1979)**

## Personalwirtschaftliche Funktionen

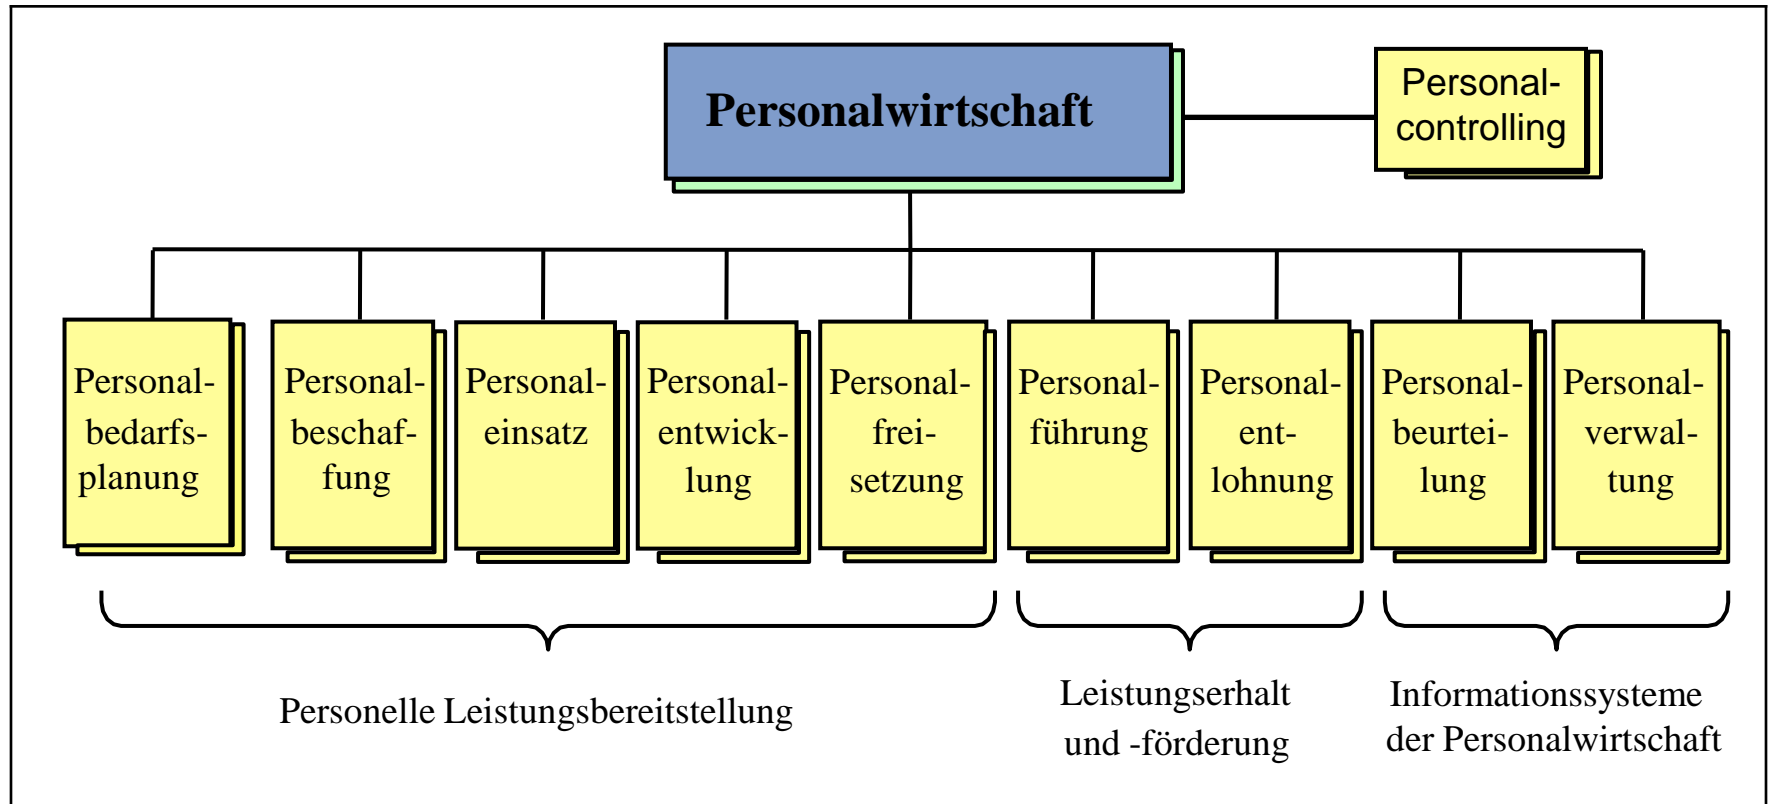

S. 4 Abb. 1

Jung, Hans: Personalwirtschaft, 9. Aufl., München 2010.

© Oldenbourg Wissenschaftsverlag

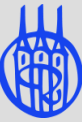

## **Teilbereiche des Personalwesens**

Wie viele Mitarbeiter welcher Qualifikation werden wann und wo gebraucht?  
(Prognose des Personalbedarfs)

Wie können die erforderlichen Mitarbeiter mit der erforderlichen Qualifikation gewonnen werden? (Maßnahmen bei Personalbedarfsplanung)

Wie können die Mitarbeiter im Hinblick auf die Anforderungen des Arbeitsplatzes und unter Berücksichtigung ihrer persönlichen Fähigkeiten und Wünsche optimal eingesetzt werden?  
(Zuordnung von Stellen und Arbeitskräften)

Wie können die Mitarbeiter auf qualifiziertere Aufgaben gezielt vorbereitet werden?  
Wie können ihre Fähigkeiten und Kenntnisse den veränderten Anforderungen angepasst werden? (Maßnahmenplanung bezüglich Personalförderung und -bildung)

Wie können überzählige Mitarbeiter unter weitgehender Vermeidung sozialer Härten abgebaut werden? (Maßnahmenplanung bei Personalüberhang)

Welche Kosten ergeben sich aus den geplanten personellen Maßnahmen?  
Wie sind diese Kosten zu steuern? (Kontrolle der Personalkosten)

## Hierarchieebenen

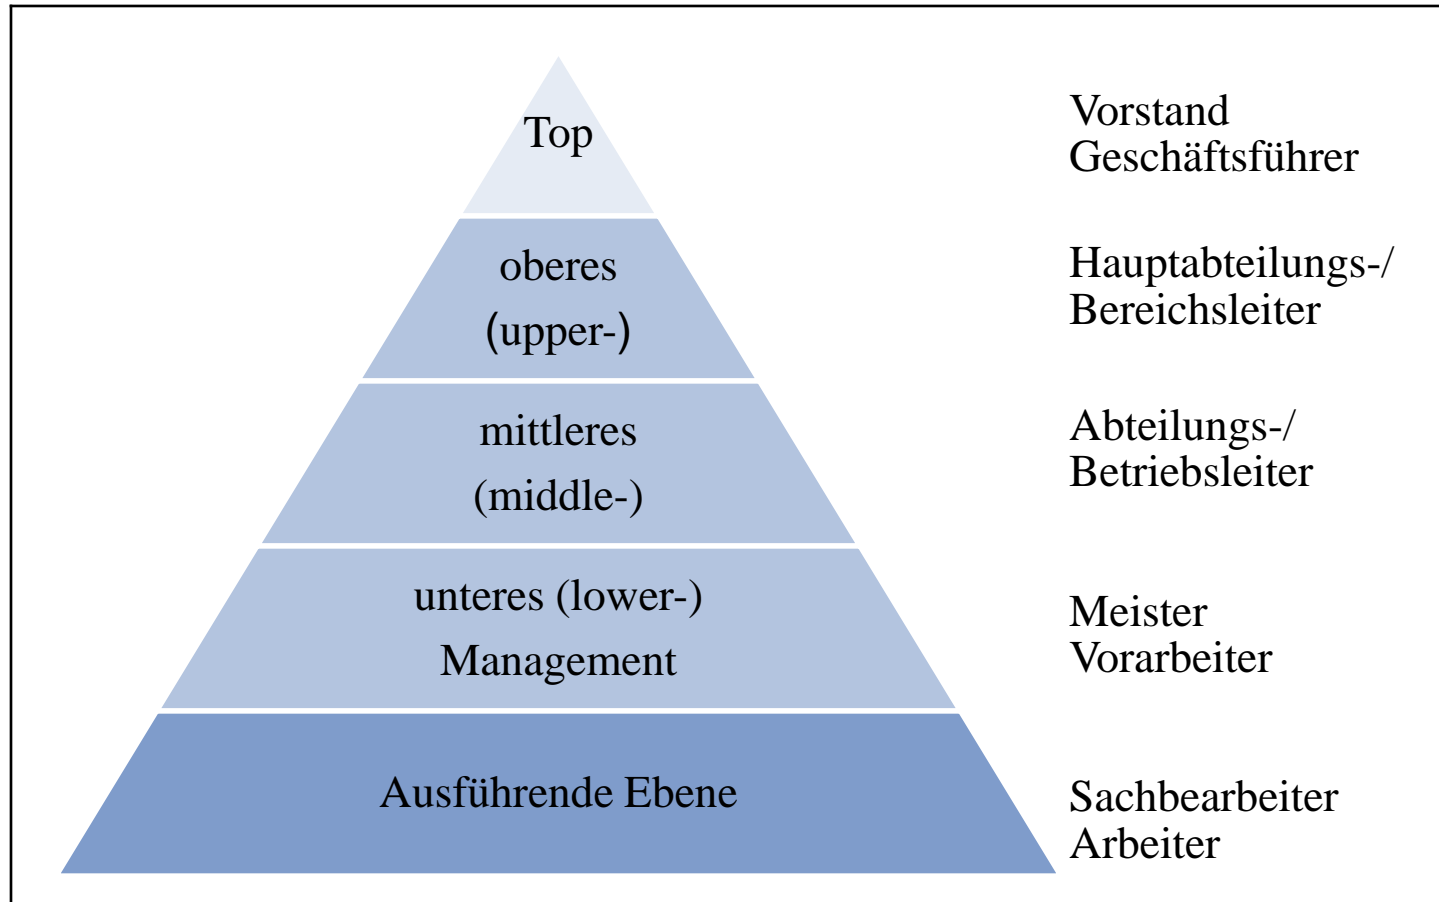

S. 7 Abb. 3



## Eigenschaften / Rollen des Personals

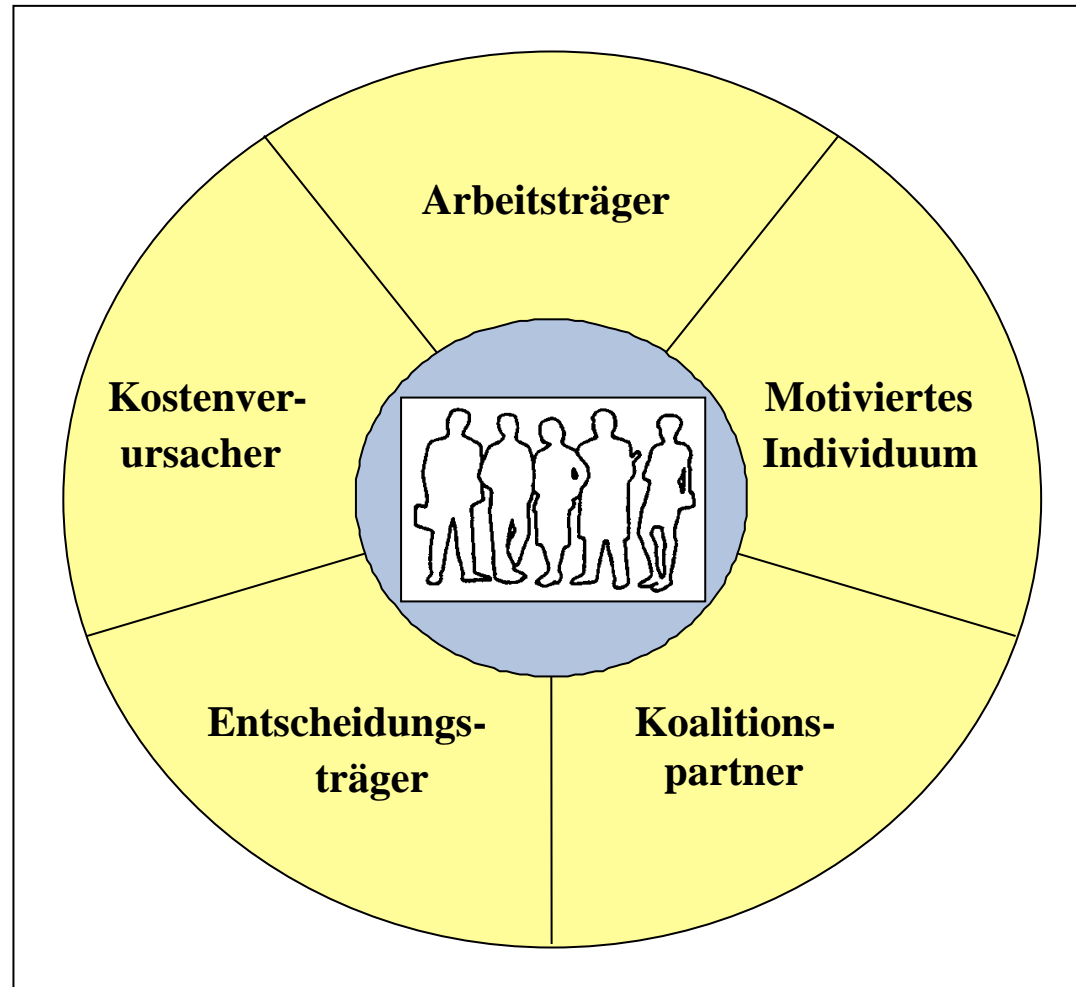

S. 9 Abb. 4

## Objekte der Personalwirtschaft

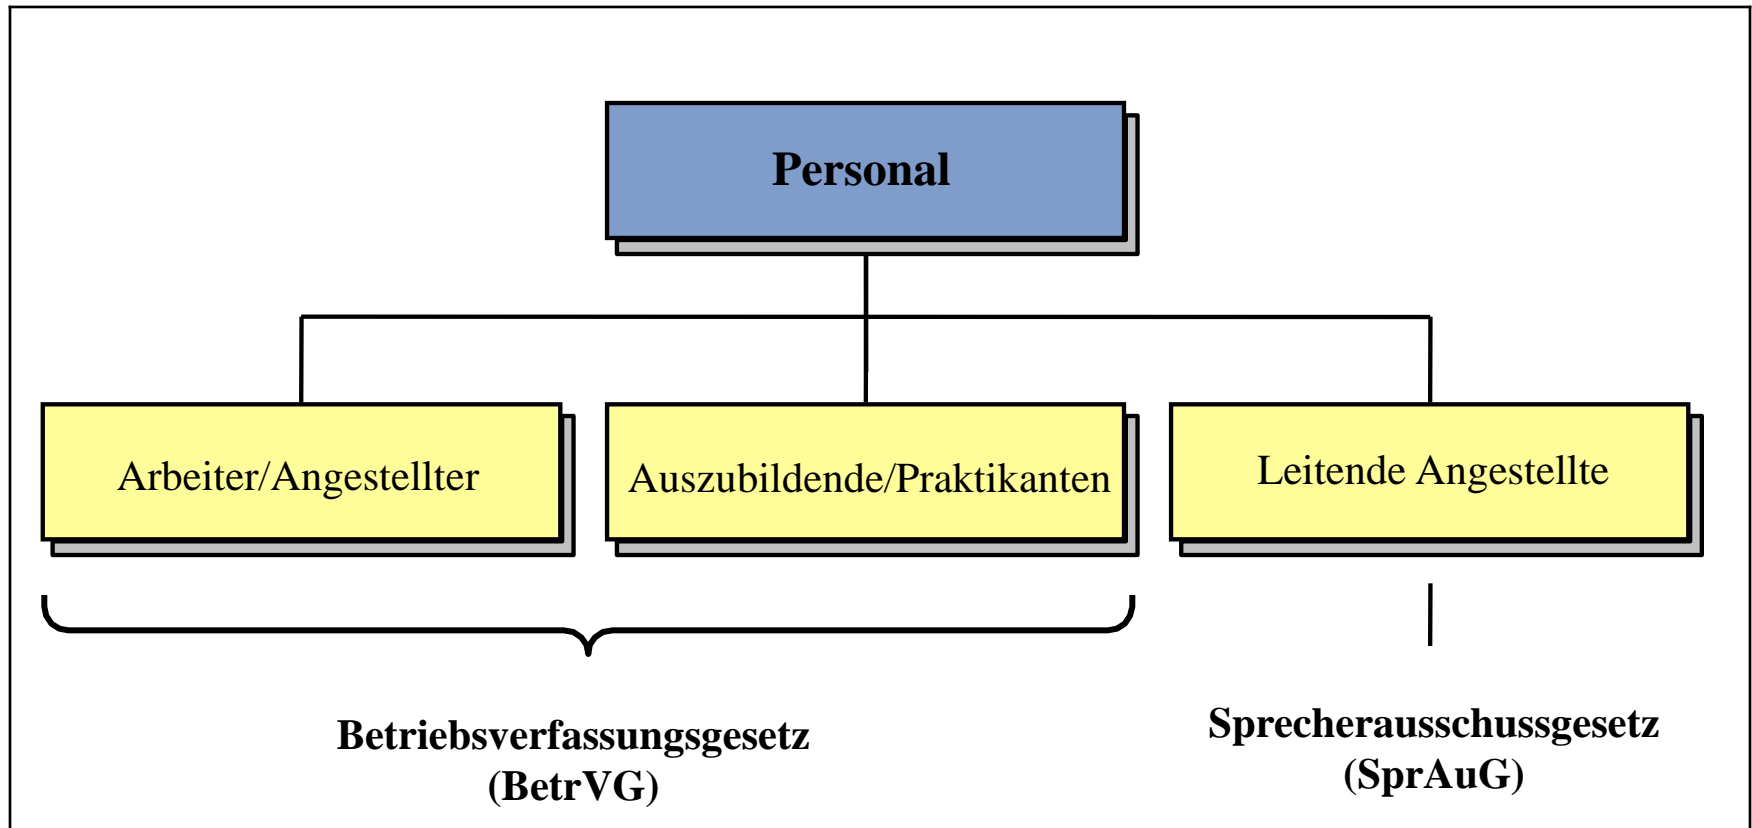

S. 10 Abb. 5

Jung, Hans: Personalwirtschaft, 9. Aufl., München 2010.

© Oldenbourg Wissenschaftsverlag



## Das Zielsystem der Personalwirtschaft

Es handelt sich bei den personalwirtschaftlichen Zielen um ein  
**duales Zielsystem.**

Zu unterscheiden sind:

- **wirtschaftliche Ziele**
- und**
- **soziale Ziele**

## Träger der Personalwirtschaft

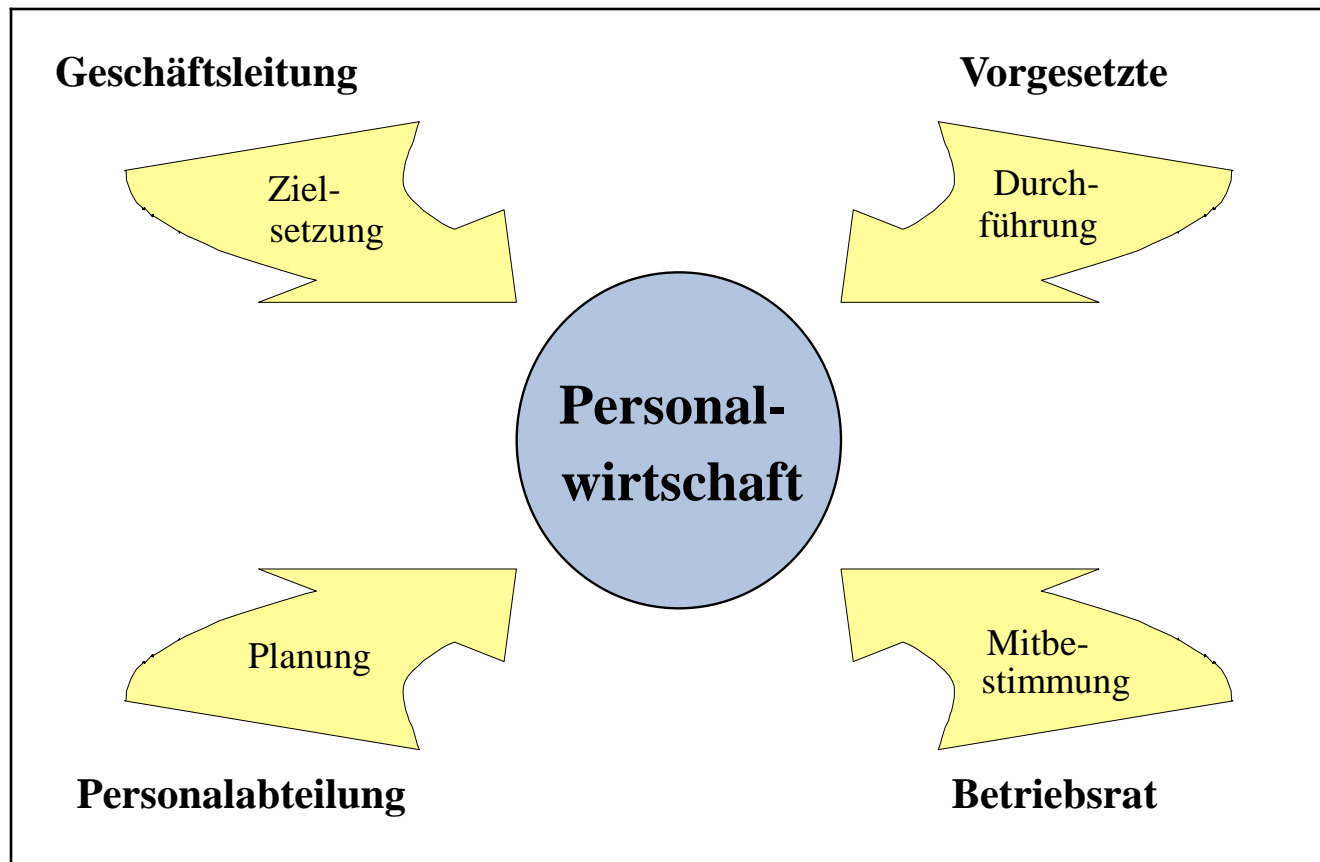

S. 11 Abb. 6

# Mitarbeiterverhalten zur Erreichung wirtschaftlicher Zielsetzungen

| Optimierung des Leistungsbeitrags der Mitarbeiter durch die                                                                                                                                                                                                                                                                                                                                                                                                                                                                                                                                                                                                                                                                                                      |                                                                                                                                                                                                                                                                                                                                                                                                                                                                                                                                                                                                                                                   |
|------------------------------------------------------------------------------------------------------------------------------------------------------------------------------------------------------------------------------------------------------------------------------------------------------------------------------------------------------------------------------------------------------------------------------------------------------------------------------------------------------------------------------------------------------------------------------------------------------------------------------------------------------------------------------------------------------------------------------------------------------------------|---------------------------------------------------------------------------------------------------------------------------------------------------------------------------------------------------------------------------------------------------------------------------------------------------------------------------------------------------------------------------------------------------------------------------------------------------------------------------------------------------------------------------------------------------------------------------------------------------------------------------------------------------|
| Bereitschaft zu:                                                                                                                                                                                                                                                                                                                                                                                                                                                                                                                                                                                                                                                                                                                                                 | Vermeidung von:                                                                                                                                                                                                                                                                                                                                                                                                                                                                                                                                                                                                                                   |
| <ul style="list-style-type: none"> <li>➤ Sparsamen Verbrauch von Werkstoffen, Hilfsstoffen und Energie</li> <li>➤ Schonung und Pflege betrieblicher Einrichtungen, Anlagen und Geräte</li> <li>➤ Abgabe von Verbesserungs- und Rationalisierungsvorschlägen</li> <li>➤ Einhaltung vorgegebener Termine</li> <li>➤ Kooperations- und Hilfsbereitschaft gegenüber Mitarbeitern und Arbeitsgruppen</li> <li>➤ Zuverlässigkeit und Gewissenhaftigkeit bezüglich übernommener Rechte und Pflichten</li> <li>➤ Weitergabe von Informationen und Know-how</li> <li>➤ Loyalität gegenüber Betrieb und Vorgesetzten</li> <li>➤ Weiterbildung auf den neuesten Stand beruflichen Wissens</li> <li>➤ Selbstständige Bewältigung unvorhersehbarer Schwierigkeiten</li> </ul> | <ul style="list-style-type: none"> <li>➤ Unberechtigten Fehlzeiten</li> <li>➤ Betrieblich unerwünschtem Arbeitsplatzwechsel</li> <li>➤ Gefährdung von Personen und Sachen</li> <li>➤ Leerlauf und Wartezeiten bei Personen und Betriebsmitteln, insbesondere durch gutes Zusammenwirken zwischen einzelnen Betriebsbereichen</li> <li>➤ exakte Dispositionen nichtstationärer Betriebsmittel</li> <li>➤ Vergeudung von Arbeitszeit</li> <li>➤ Diebstahl von Gütern und geistigem Eigentum anderer Mitarbeiter</li> <li>➤ Auseinandersetzungen, die den Arbeitsfrieden stören</li> <li>➤ Mangelnde Arbeitsdisziplin und Unpünktlichkeit</li> </ul> |

S. 13 Abb. 7

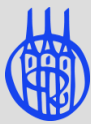

# Lebensorientierung der Deutschen nach Alters- und Berufsgruppen

| Lebensorientierung          | Leben als Aufgabe | Leben genießen | Unentschieden |
|-----------------------------|-------------------|----------------|---------------|
| <b>Altersgruppen</b>        |                   |                |               |
| 16-29 Jahre                 | 34                | 46             | 20            |
| 30-44 Jahre                 | 40                | 36             | 24            |
| 45-59 Jahre                 | 45                | 38             | 17            |
| 60 Jahre und älter          | 59                | 24             | 17            |
| <b>Berufskreise</b>         |                   |                |               |
| Angelernte Arbeiter         | 46                | 34             | 20            |
| Facharbeiter                | 37                | 39             | 24            |
| Einfache Angestellte/Beamte | 44                | 38             | 18            |
| Leitende Angestellte/Beamte | 56                | 24             | 20            |
| Selbstständige/freie Berufe | 54                | 30             | 16            |

S. 15 Abb. 8  
(in Anlehnung an: Wunderer, R.: Führung und Zusammenarbeit, 5. Aufl., Wiesbaden, S. 179)

## Zielbeziehungen

- Komplementäre Ziele

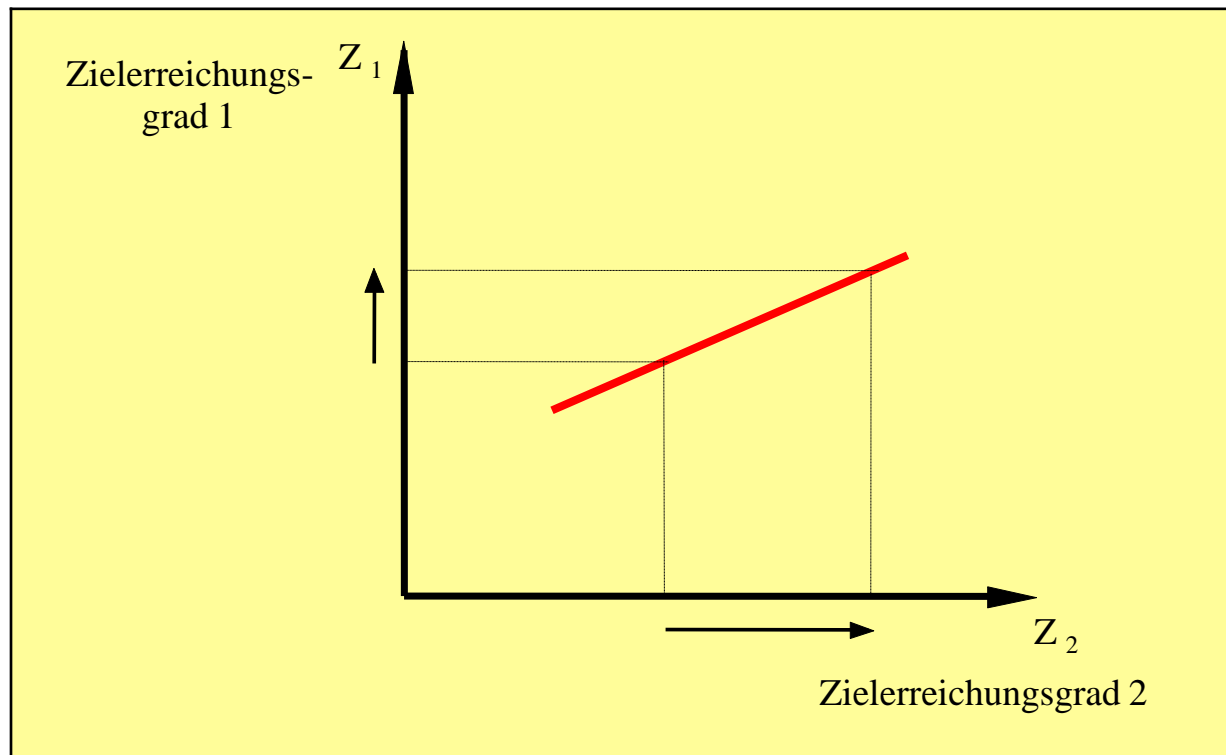

S. 17 Abb. 9

- Indifferente Ziele

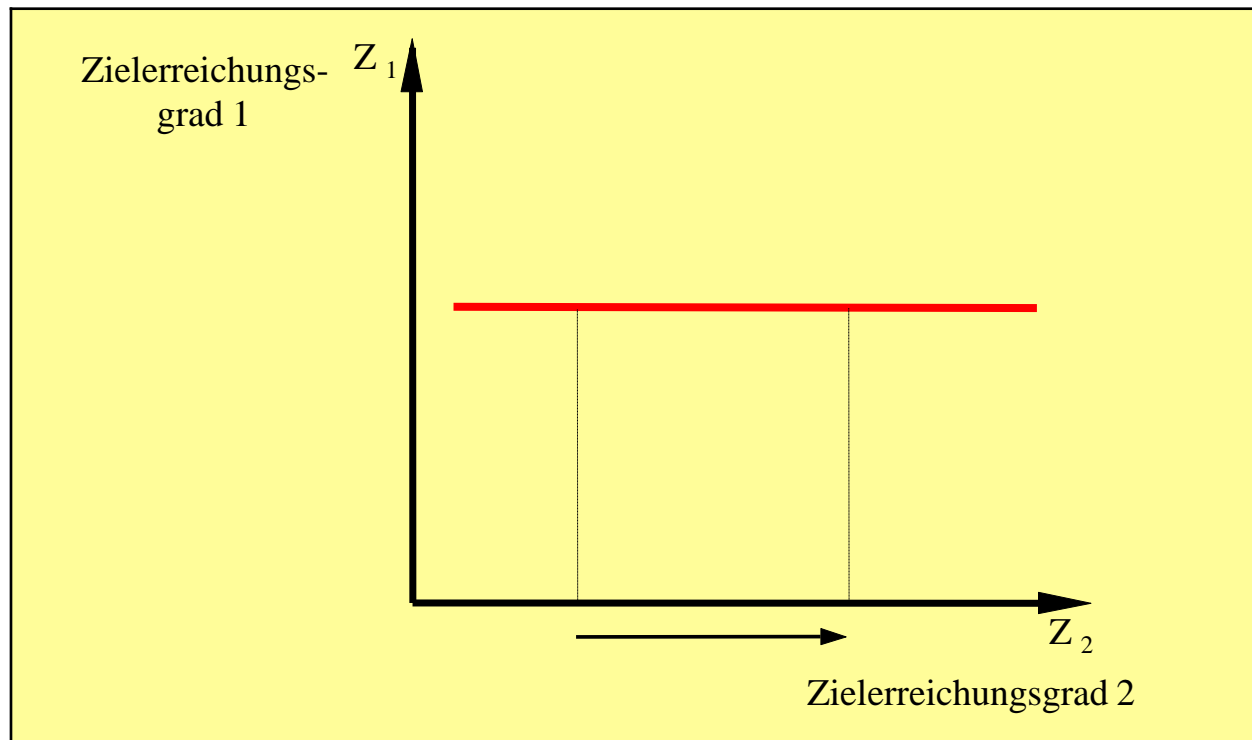

S. 17 Abb. 10

Jung, Hans: Personalwirtschaft, 9. Aufl., München 2010.

© Oldenbourg Wissenschaftsverlag



- **Konkurrierende Ziele**

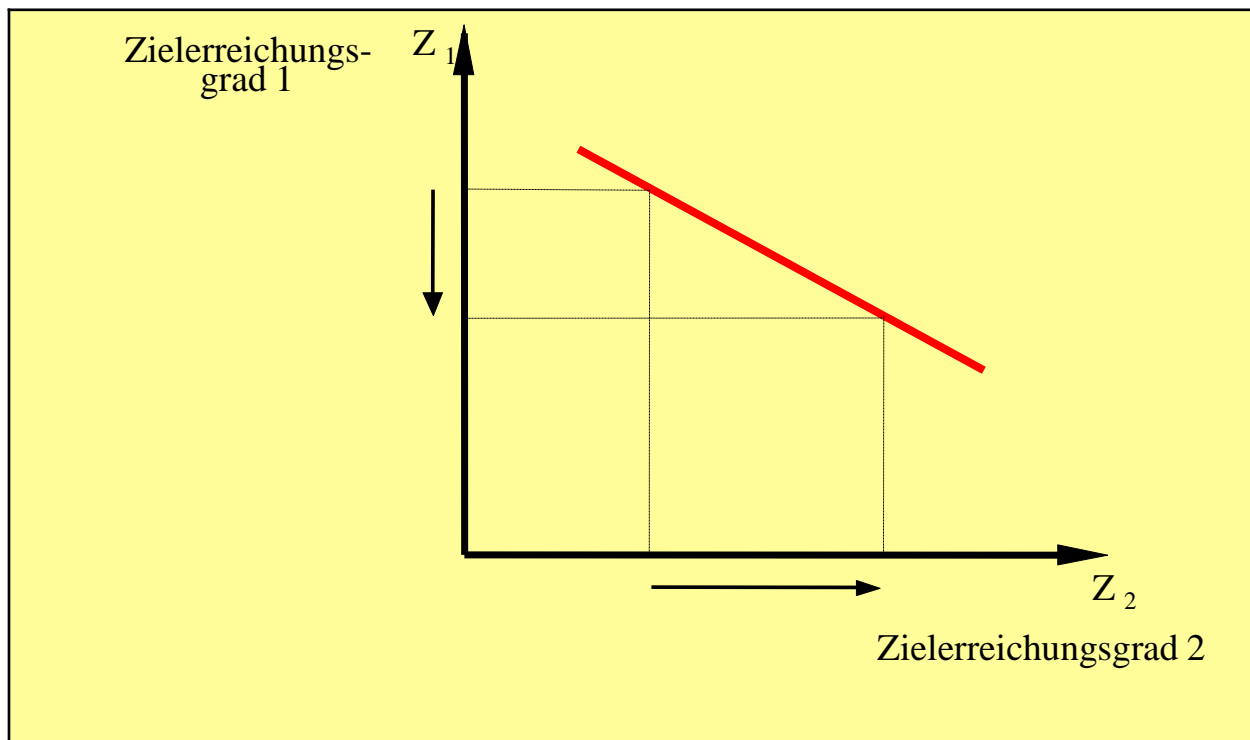

S. 18 Abb.11

### Phasen des Entscheidungsprozesses

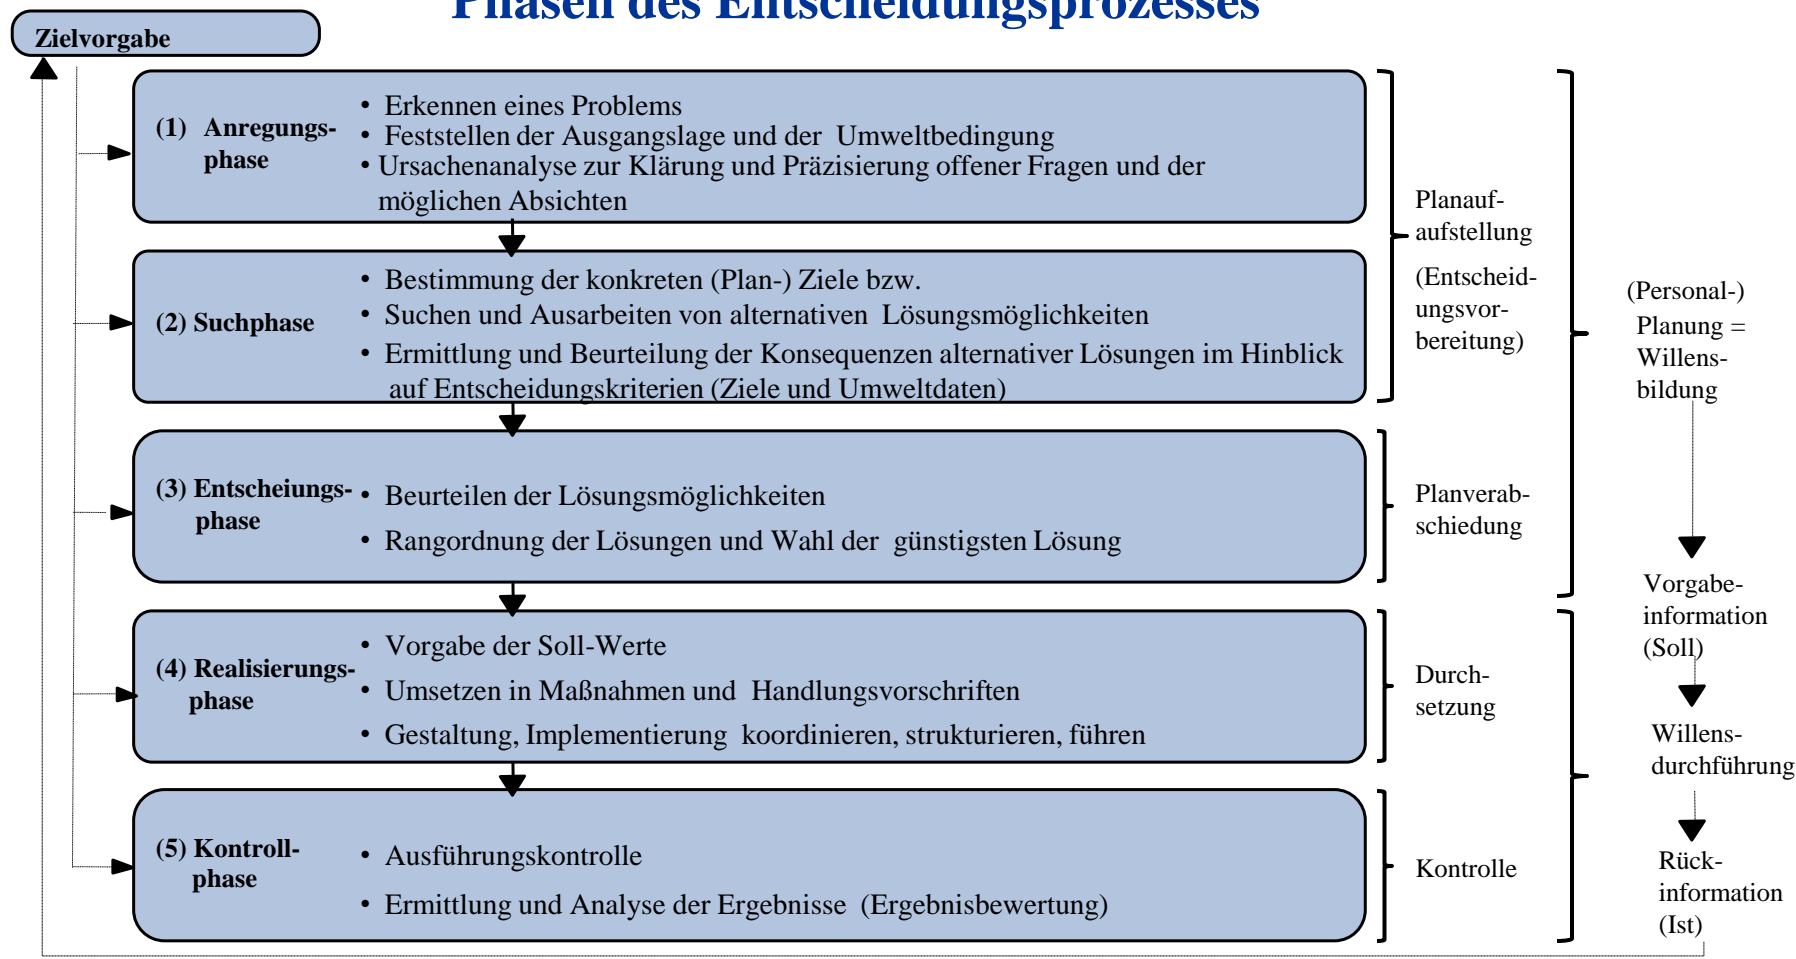

S. 19 Abb.12  
 (in Anlehnung an: Hentze, J.: Personalwirtschaftslehre 1, 6. Auflage, Bern/Stuttgart, S. 67 ff.)

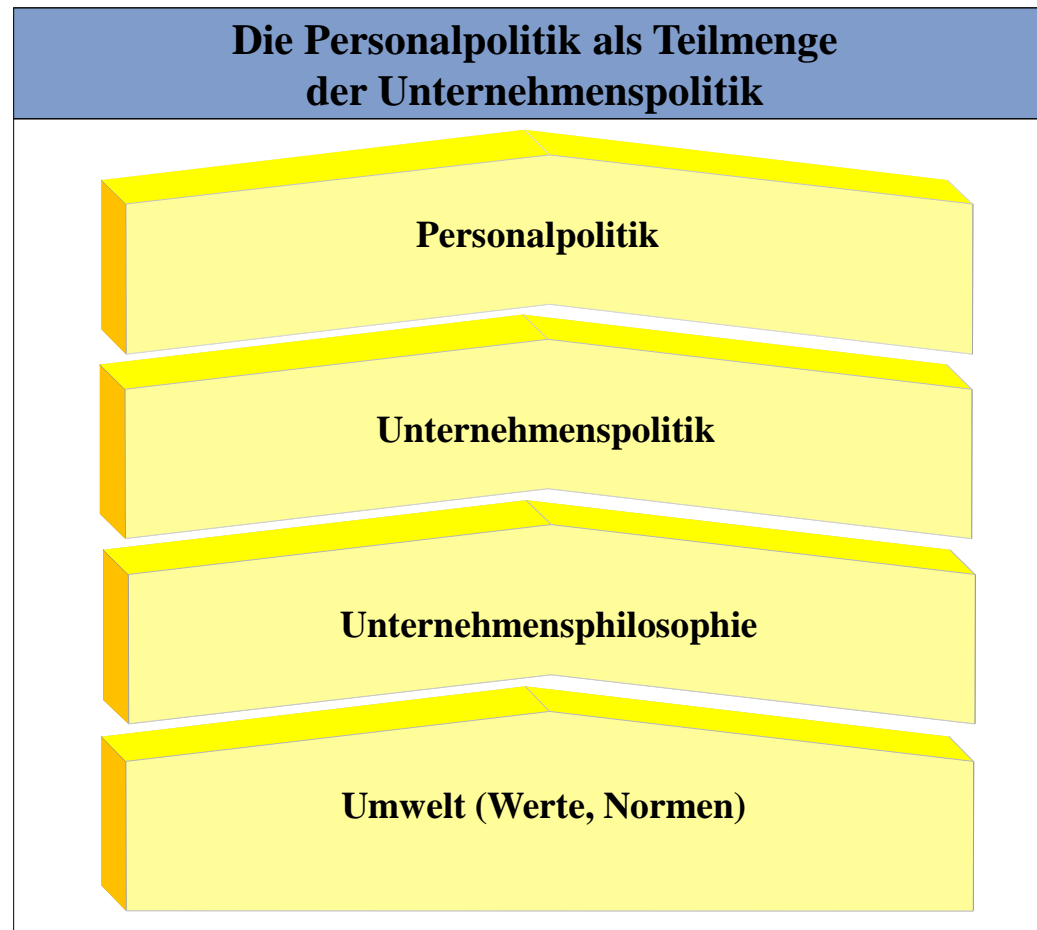

S. 22 Abb.13

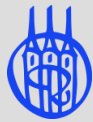

# Unternehmenskultur, Unternehmensidentität und Unternehmensethik

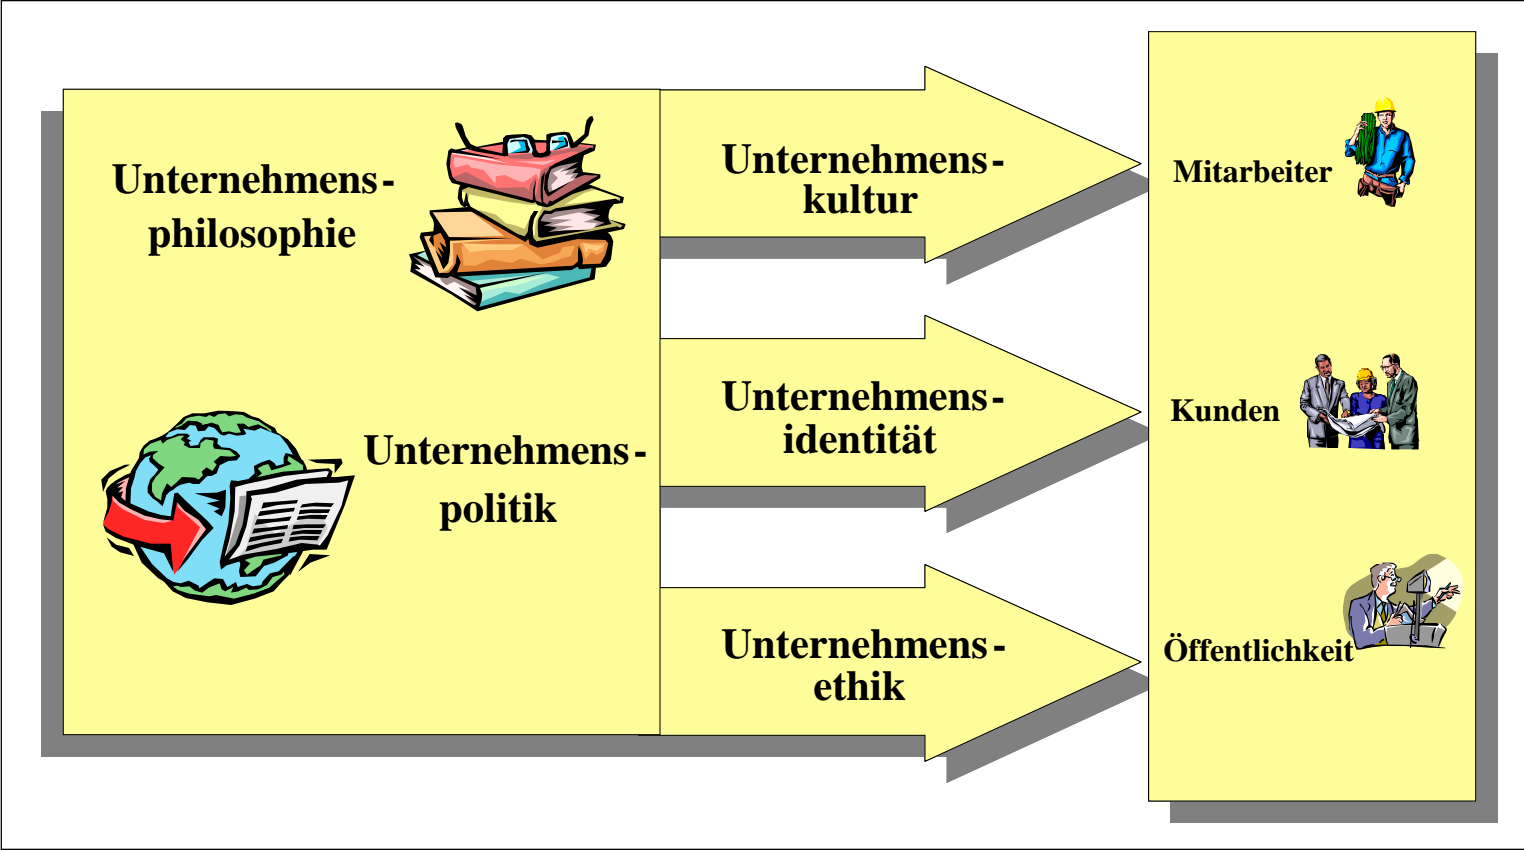

S. 23 Abb.14



## Die Beziehung zwischen Ethik, Moral und Sittlichkeit

**Ethik:** Methodische, fundierte, prinziporientierte Morallehre

**Moral:** Faktisch vorherrschendes Werte- und Normsystem,  
Das von einer Gesellschaft gemeinsam geteilt wird

**Sittlichkeit:** Ethisches Denken und Handeln, das sich am  
Gewissen einer Person orientiert

## Die Faktoren der Unternehmensidentität

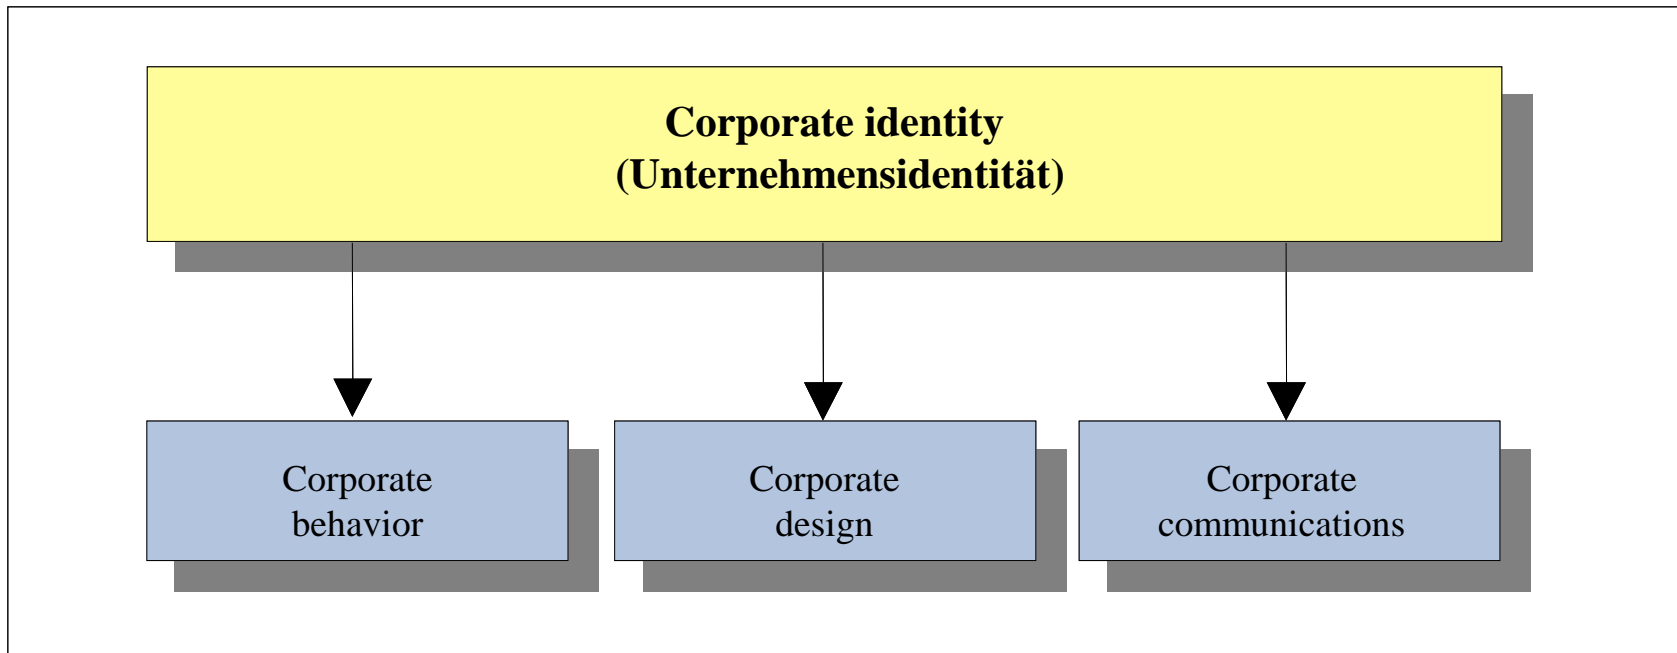

S. 26 Abb.16

Jung, Hans: Personalwirtschaft, 9. Aufl., München 2010.

© Oldenbourg Wissenschaftsverlag



## **Wissenschaftliche Disziplinen mit personalwirtschaftlichem Bezug**

- Volkswirtschaftslehre: Lohn-, Arbeitsmarkt- und Sozialpolitik
- Betriebswirtschaftslehre: Produktions- und Kostentheorie
- Psychologie: innere Einstellung, seelische Vorgänge, Motivation
- Soziologie: Gruppenbeziehung, Konflikte, gesellschaftliche Einflüsse, Mensch-Maschine-Beziehung, Machtverteilung, Verhalten bei der Arbeit.
- Arbeitswissenschaft: Gestaltung und Auswirkungen der Arbeit, Ergonomie, Arbeitsphysiologie.
- Arbeitsrecht: Arbeitsvertrag, Arbeitsschutz, Mittbestimmung
- Medizin: Arbeitshygiene, Arbeitsschutz, Berufskrankheiten
- Anthropologie: Kulturunterschiede
- Entscheidungs- u. Informationstheorie: Entscheidungen, Informationen und Informationsübertragung

## Nachbarwissenschaften der Personalwirtschaftslehre

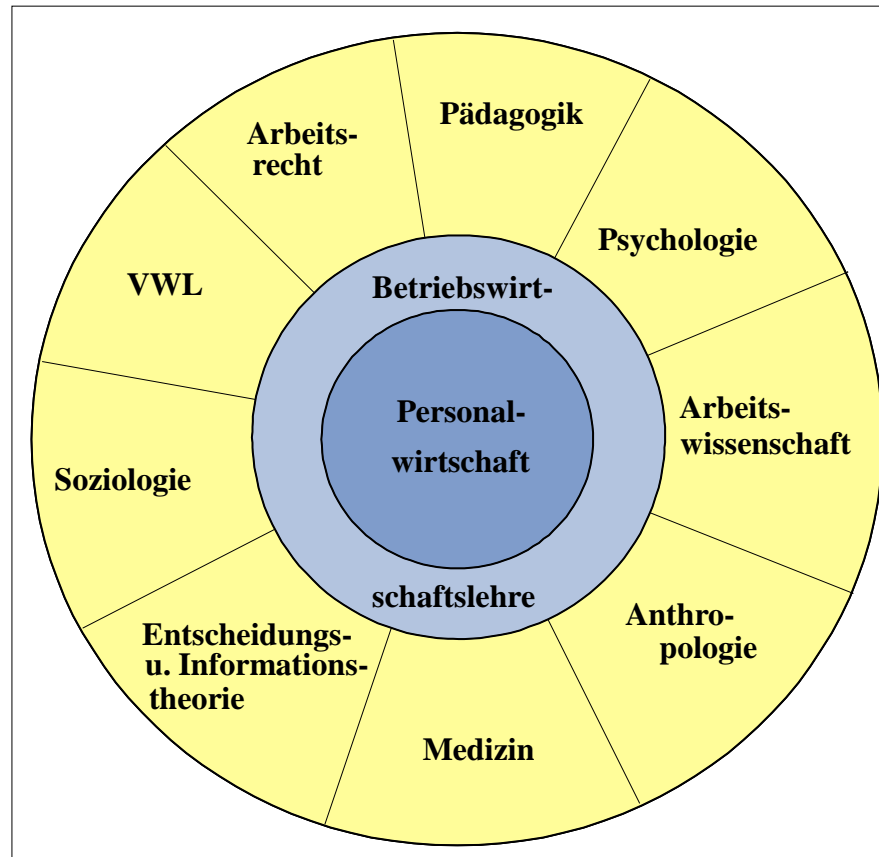

S. 28 Abb.17

Jung, Hans: Personalwirtschaft, 9. Aufl., München 2010.

© Oldenbourg Wissenschaftsverlag



## 2. Organisation der Personalwirtschaft

- 2.1 Grundlagen
- 2.2 Organisatorische Einordnung des Personalwesens  
in die Betriebshierarchie
- 2.3 Organisationsformen des Personalwesens
- 2.4 Personelle Ausstattung der Personalabteilung

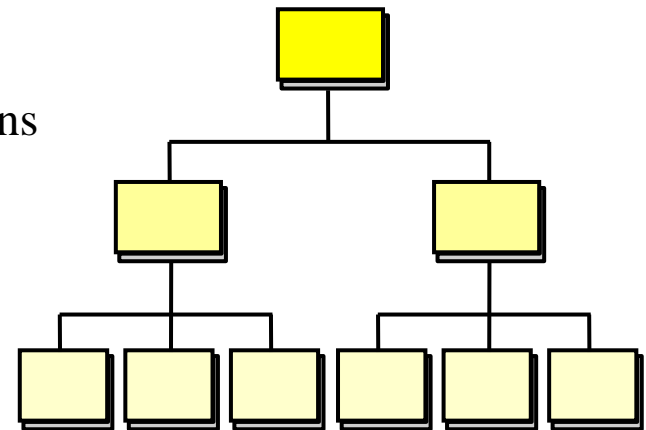



## Organisation der Personalwirtschaft

Der Begriff Organisation kann in unterschiedlicher Bedeutung verwendet werden.  
Er bezeichnet

- den Prozess des planvollen Erstellens langfristiger Strukturen
- das Ergebnis dieses Prozesses, die Strukturen selbst
- ein soziales Gebilde

Die organisatorische Gliederung des Personalwesens sowie seine Stellung innerhalb der Gesamtorganisation eines Unternehmens ist grundsätzlich davon abhängig, welche Bedeutung dem Personalsektor im Unternehmen beigemessen wird.

Der Zwang zu systematischer Organisation ist dabei umso größer, je

- größer das Unternehmen ist,
- höher der Grad der Internationalisierung ist,
- schneller das Unternehmen wächst,
- höher der Kapitalaufwand pro Mitarbeiter ist.



Die **Aufgabenanalyse** kann aus folgenden fünf Teilbereichen bestehen:

- die Verrichtungsanalyse zerlegt in Tätigkeitsarten
- die Objektanalyse zerlegt in Objekte der Aufgabe
- die Ranganalyse zerlegt in Entscheidungs- und Ausführungsaufgaben
- die Phasenanalyse zerlegt in die Phasen Planung, Realisation und Kontrolle
- die Zweckbeziehungsanalyse zerlegt in Zweck- und Verwaltungsaufgaben

Die **Aufgabensynthese** bildet durch

- die Zusammenfassung von Aufgaben **Stellen**,
- die in Stellenbeschreibungen dokumentiert werden.

Eine Stelle, die Weisungsbefugnisse gegenüber anderen Stellen besitzt, heißt Instanz.

Durch die Zusammenfassung und hierarchische Abstufung von Stellen entstehen Abteilungen, die wiederum zu Hauptabteilungen und, je nach Unternehmensgröße, zu Unternehmensbereichen verknüpft werden können.

## Hierarchische Eingliederung des Personalwesens unter die kaufmännische Leitung

(2. Hierarchieebene)

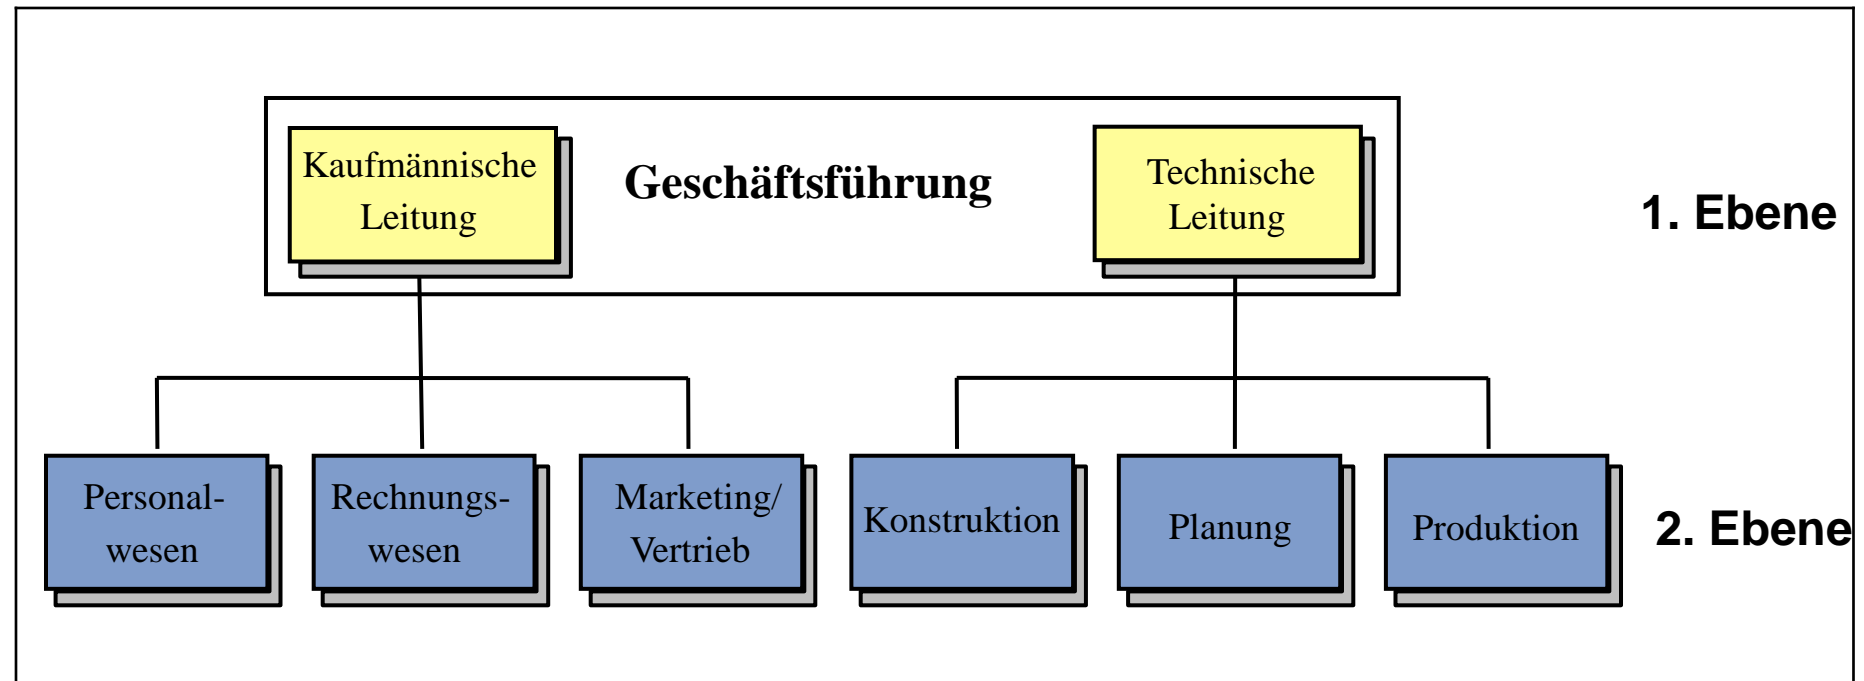

S. 31 Abb.18

Jung, Hans: Personalwirtschaft, 9. Aufl., München 2010.

© Oldenbourg Wissenschaftsverlag

## Spaltung des Personalwesens bei dualer Geschäftsführung

(2. Hierarchieebene)

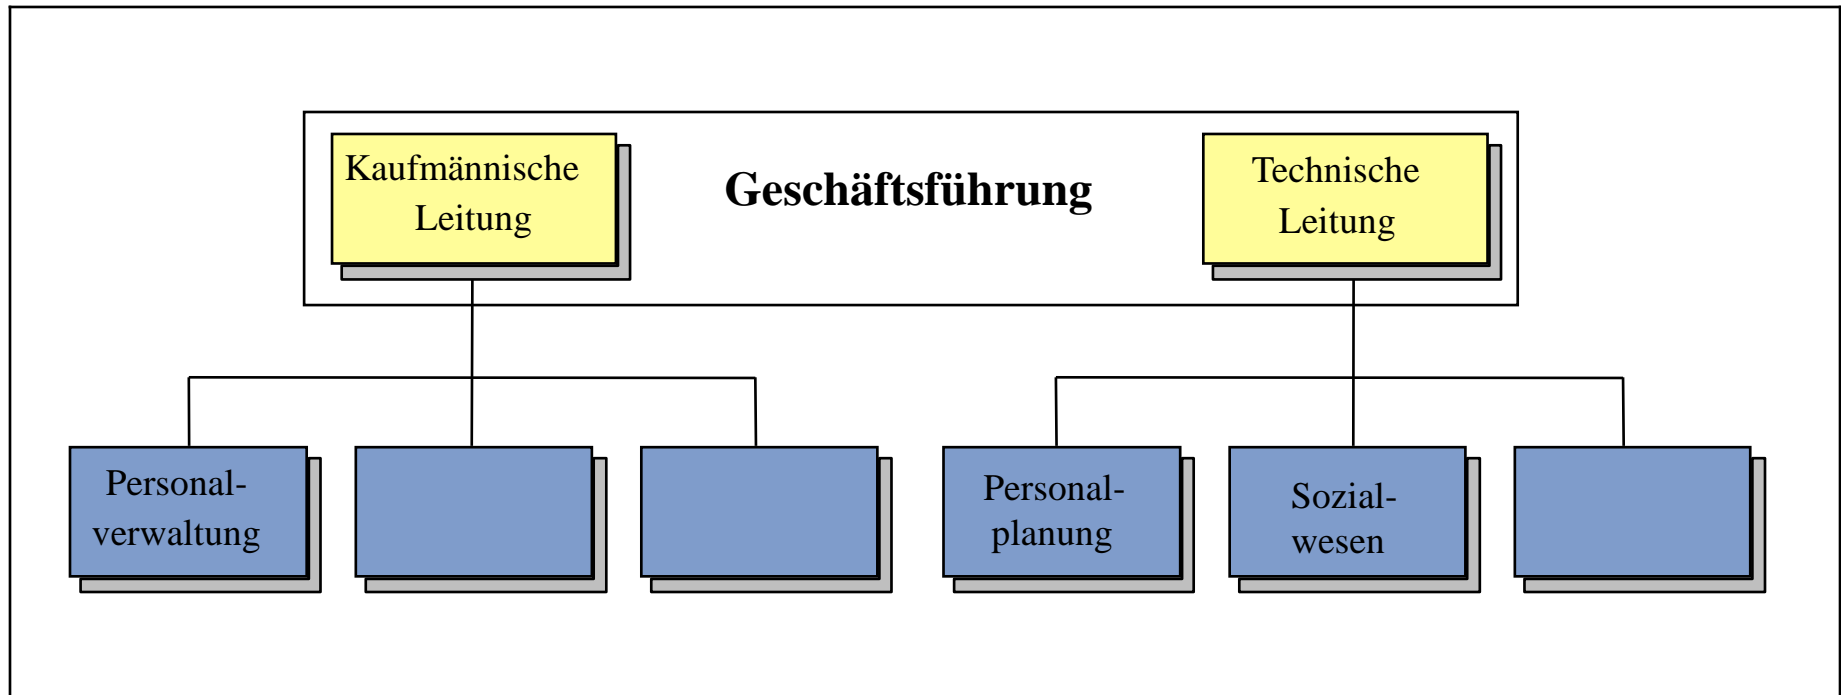

S. 31 Abb.19

Jung, Hans: Personalwirtschaft, 9. Aufl., München 2010.

© Oldenbourg Wissenschaftsverlag

## Direkte Unterstellung des Personalwesens unter den Vorsitz

(2. Hierarchieebene)

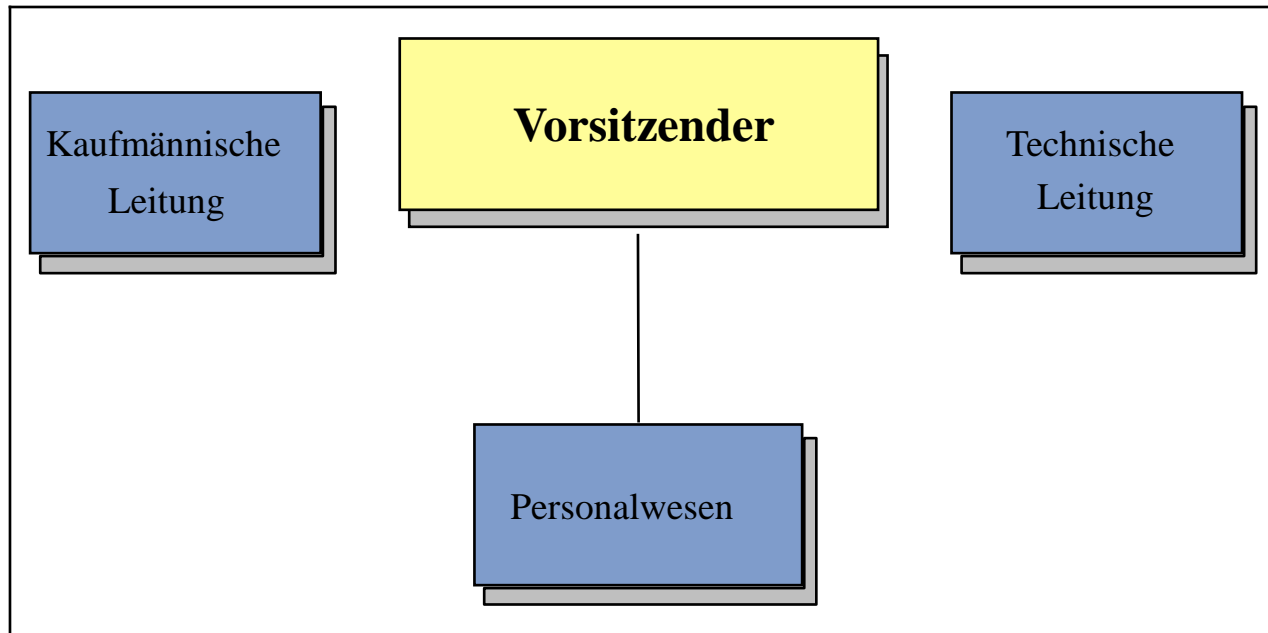

S. 32 Abb.20

Jung, Hans: Personalwirtschaft, 9. Aufl., München 2010.

© Oldenbourg Wissenschaftsverlag

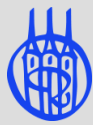

# Personalwesen unter der Führung eines Zwischenvorgesetzten

(3. Hierarchieebene)

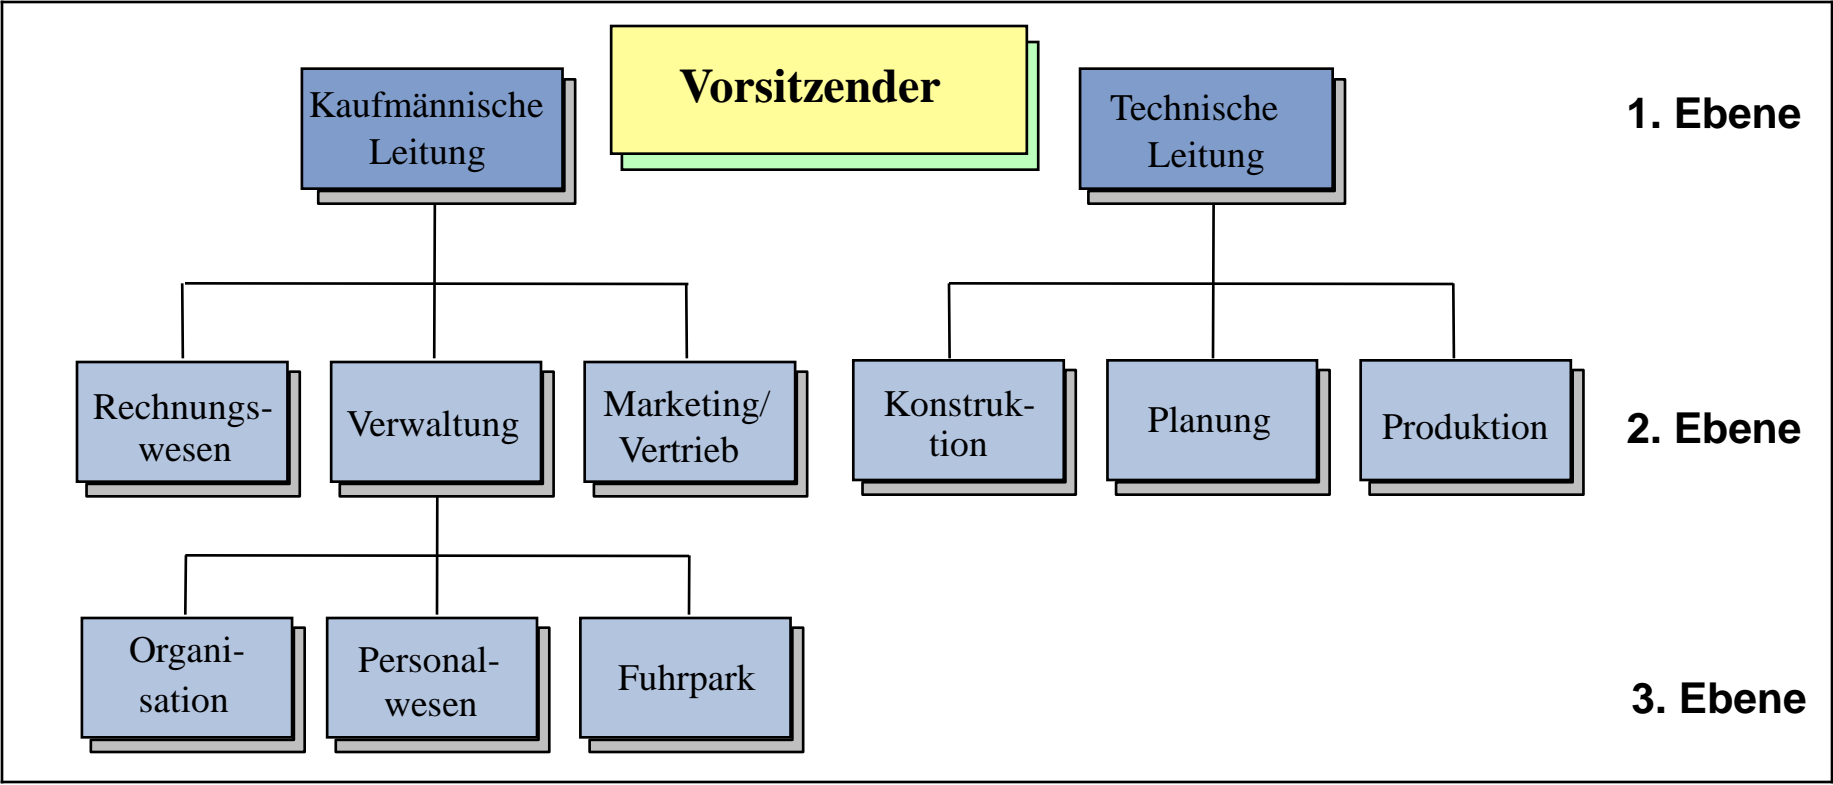

S. 32 Abb. 21

## Eingliederung des Personalwesens in die Unternehmensleitung

(1. Hierarchieebene)

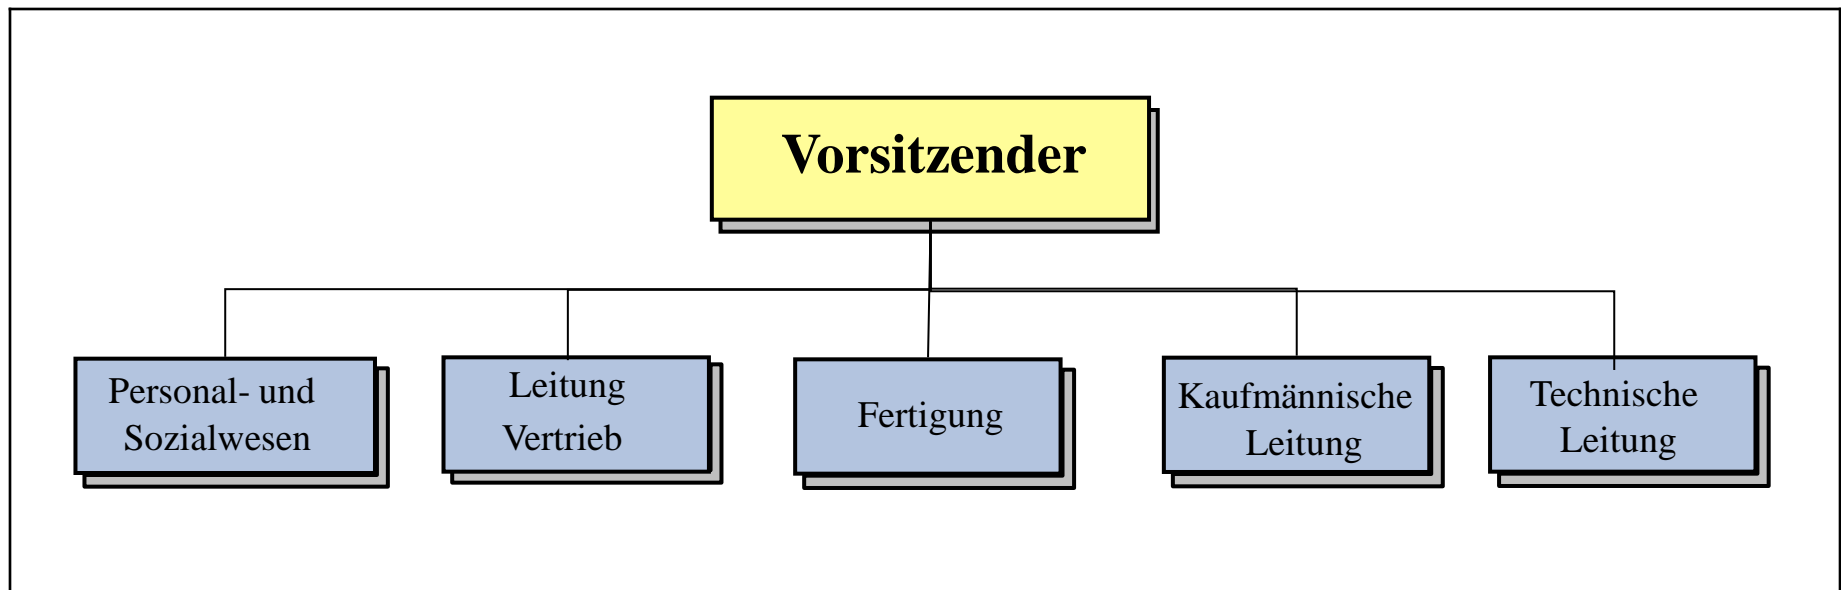

S. 33 Abb.22

Jung, Hans: Personalwirtschaft, 9. Aufl., München 2010.

© Oldenbourg Wissenschaftsverlag





## Eingliederung des Personalwesens bei einer Spartenorganisation

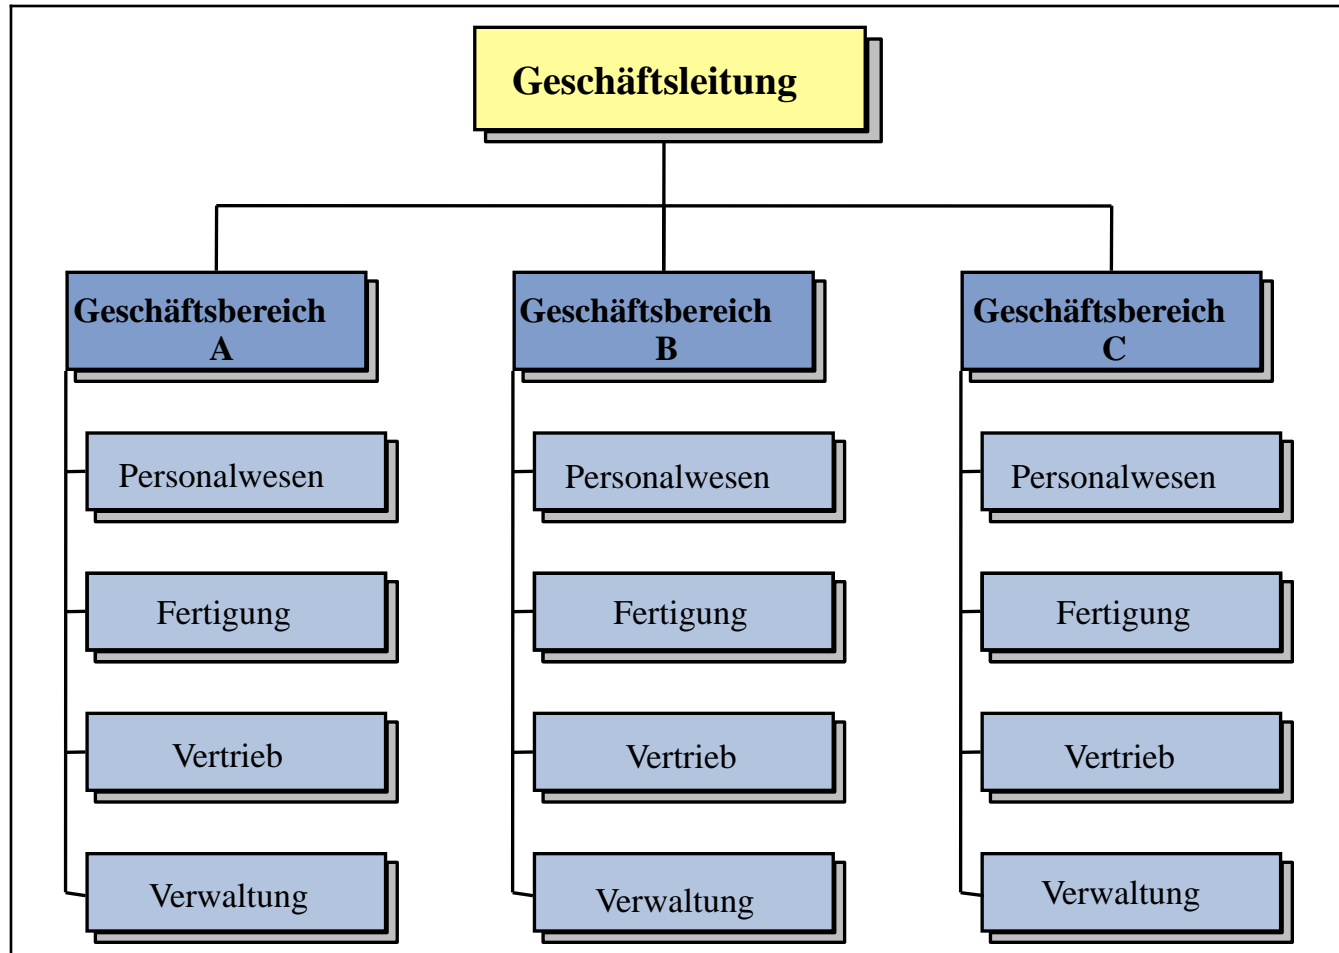

S. 34 Abb.23

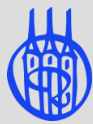

Eingliederung des Personalwesens bei einer Matrixorganisation

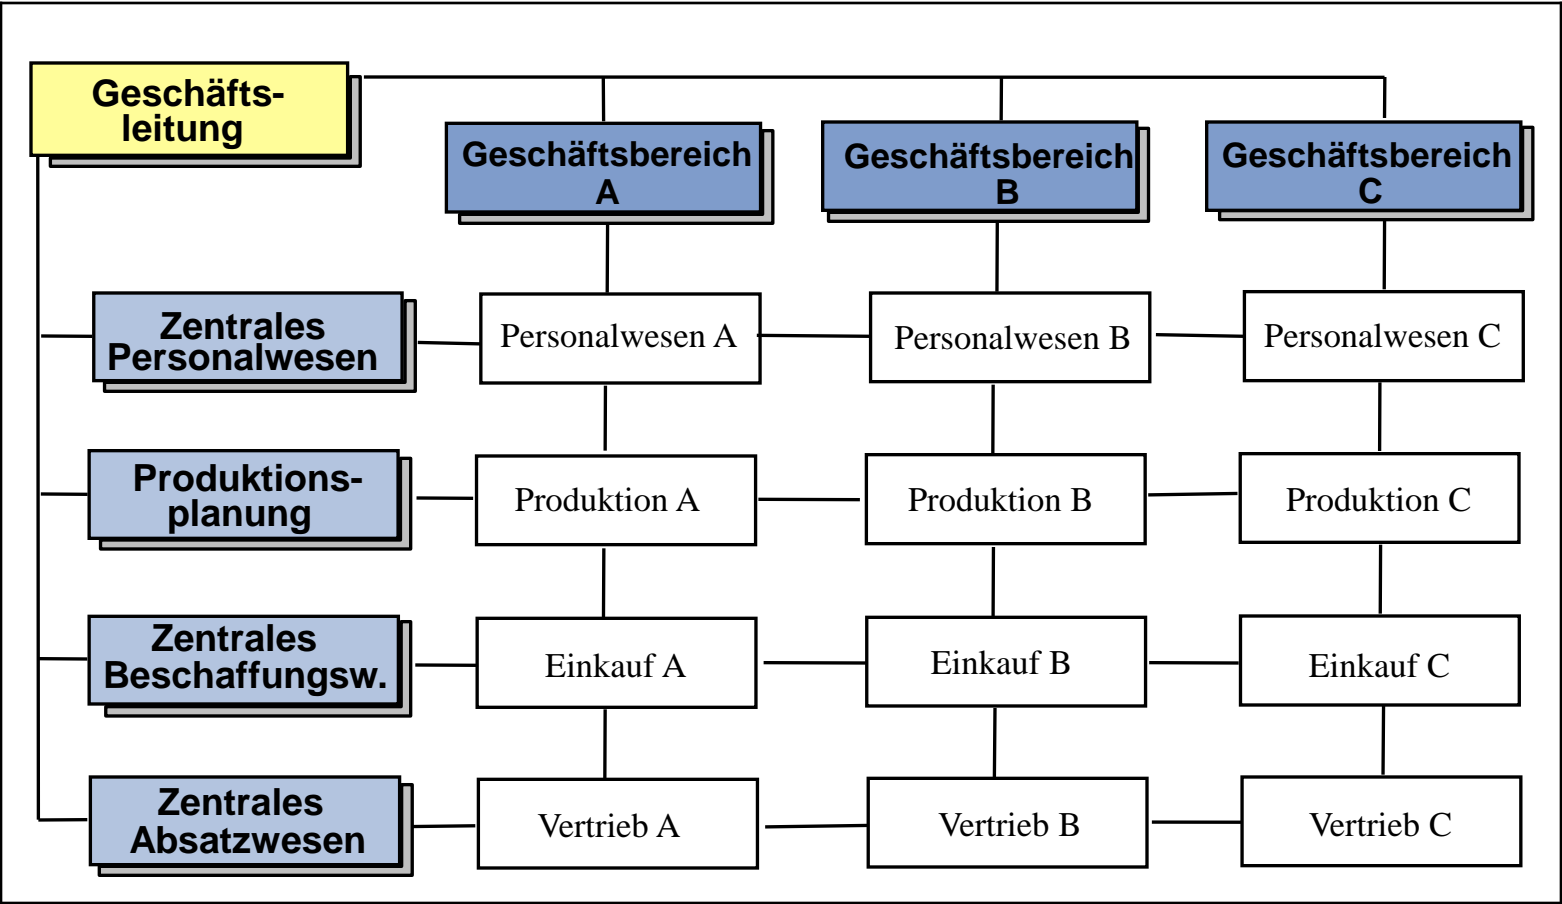

S. 35 Abb. 24

## Organisation des Personalwesen (Personalabteilung)

### A. Funktionsbezogene Organisation

#### 1. Gliederung nach Zielkategorien

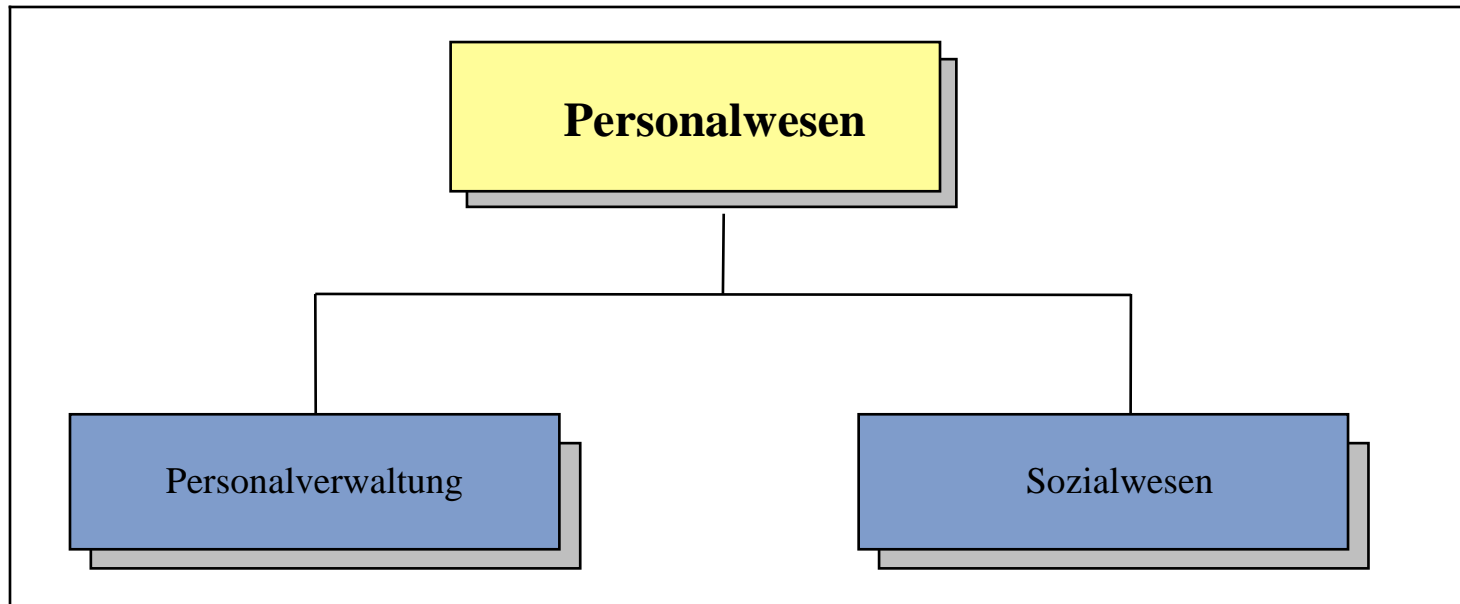

## 2. Gliederung nach Funktionsschwerpunkten

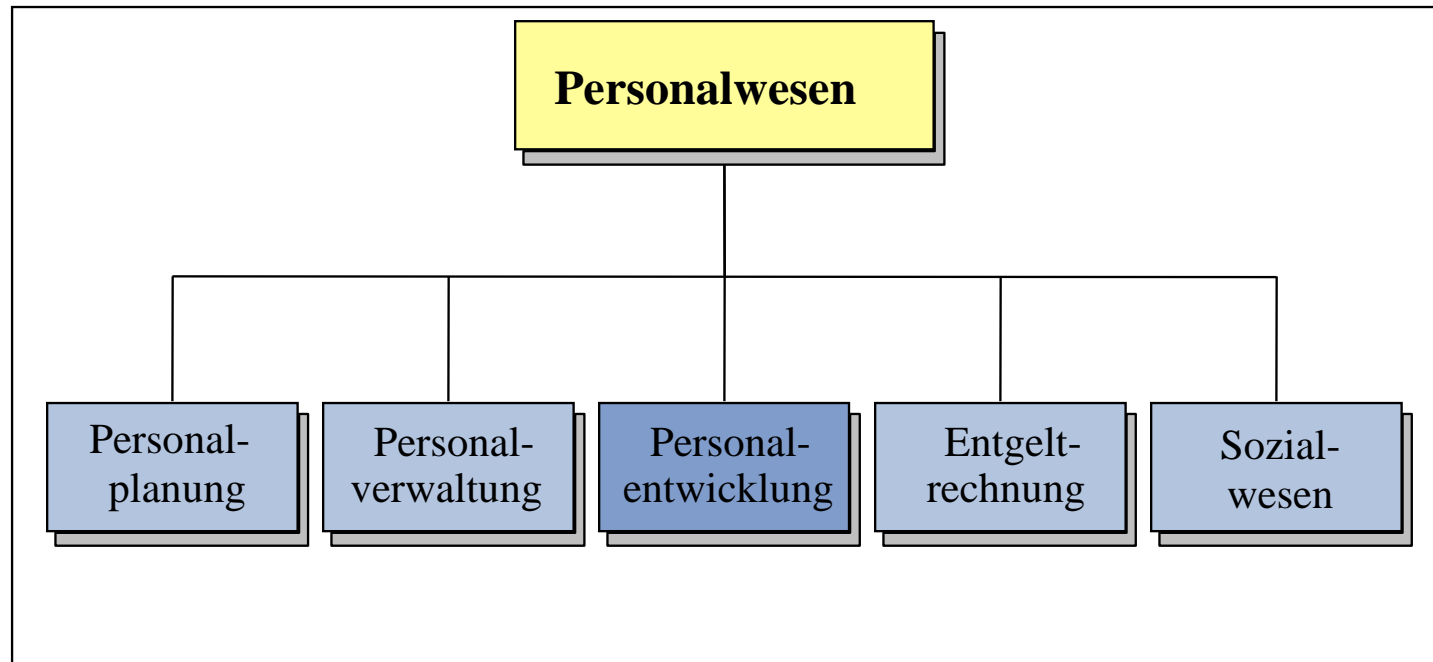

S. 37 Abb. 26

Jung, Hans: Personalwirtschaft, 9. Aufl., München 2010.

© Oldenbourg Wissenschaftsverlag

## Weitere Gliederungsmöglichkeit der Personalentwicklung

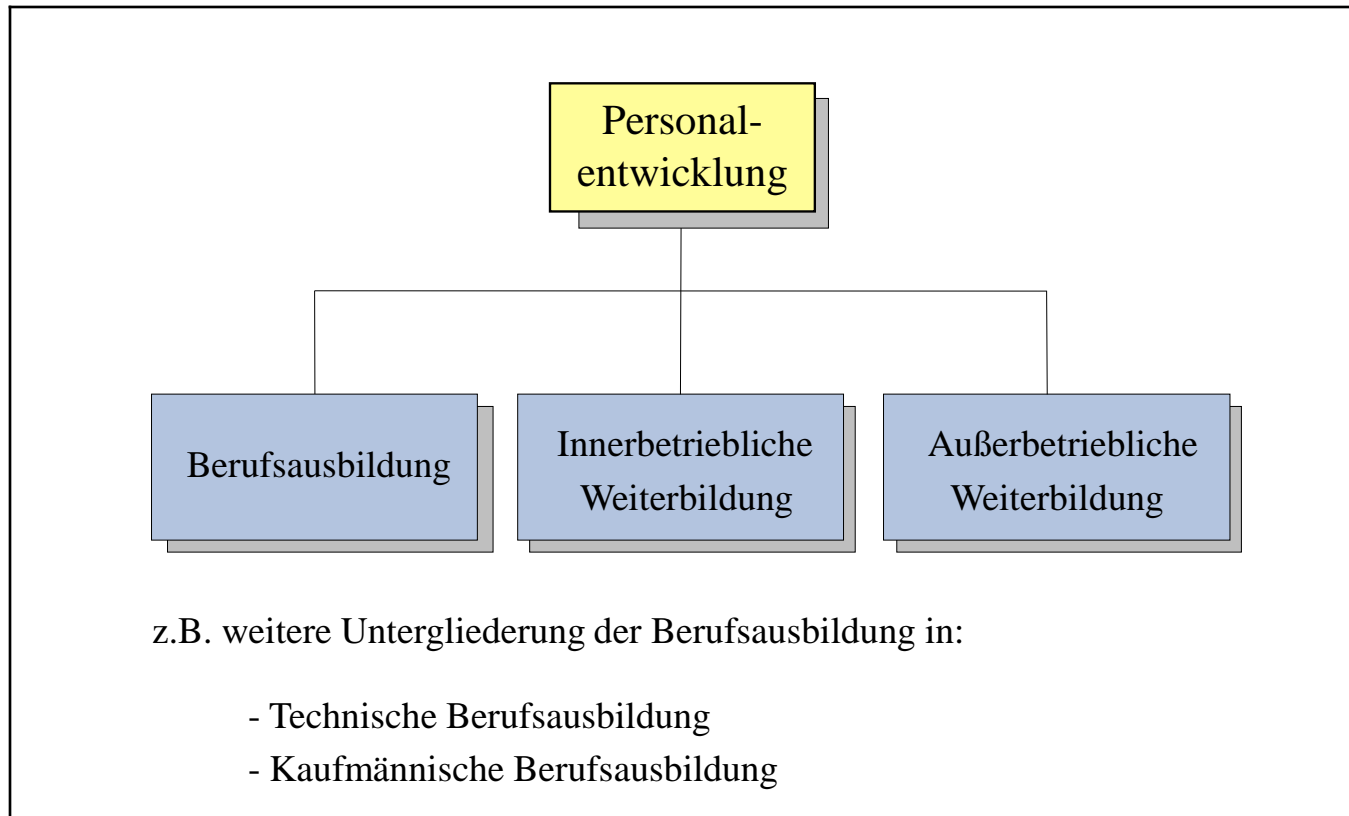

S. 37 Abb. 27

### 3. Gliederung nach Prozessphasen

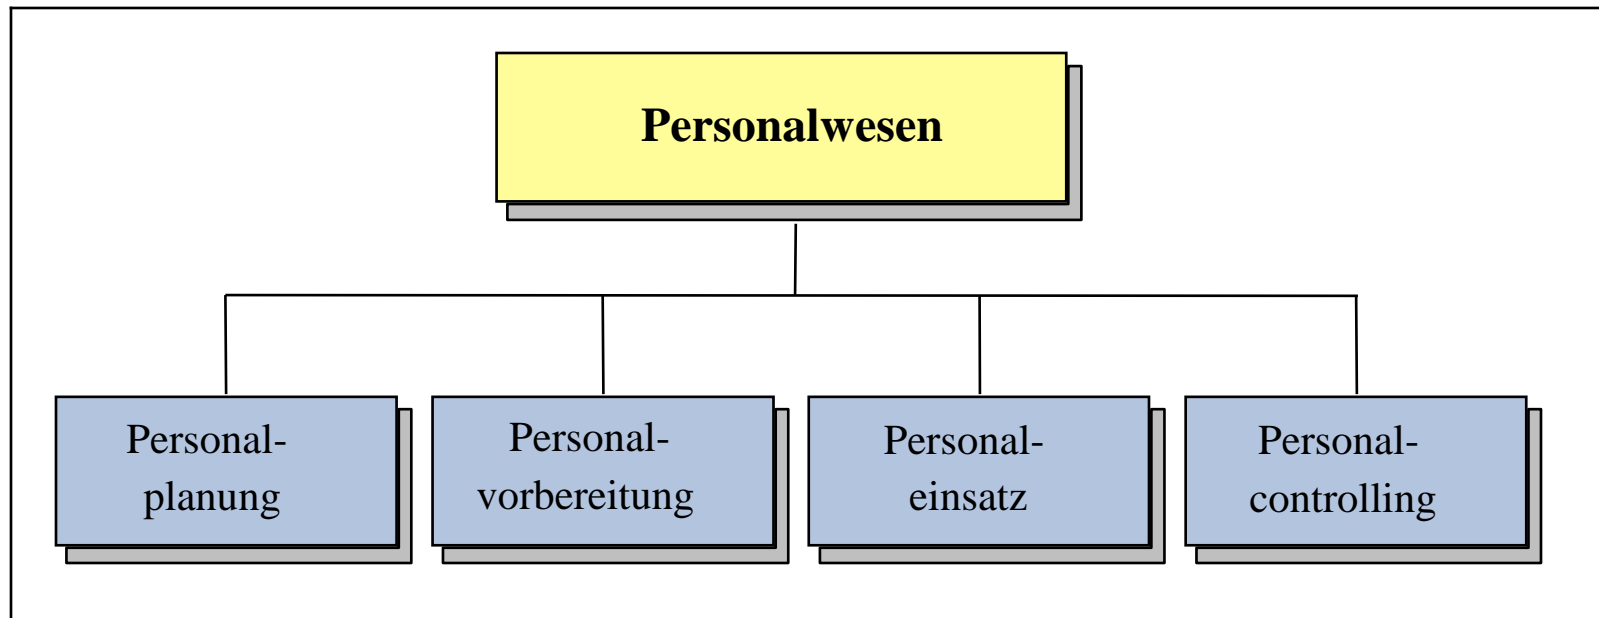

S. 38 Abb. 28

Jung, Hans: Personalwirtschaft, 9. Aufl., München 2010.

© Oldenbourg Wissenschaftsverlag

## B. Objektbezogene Organisation

### 1. Klassische Organisation des Personalwesens nach Belegschaftsgruppen

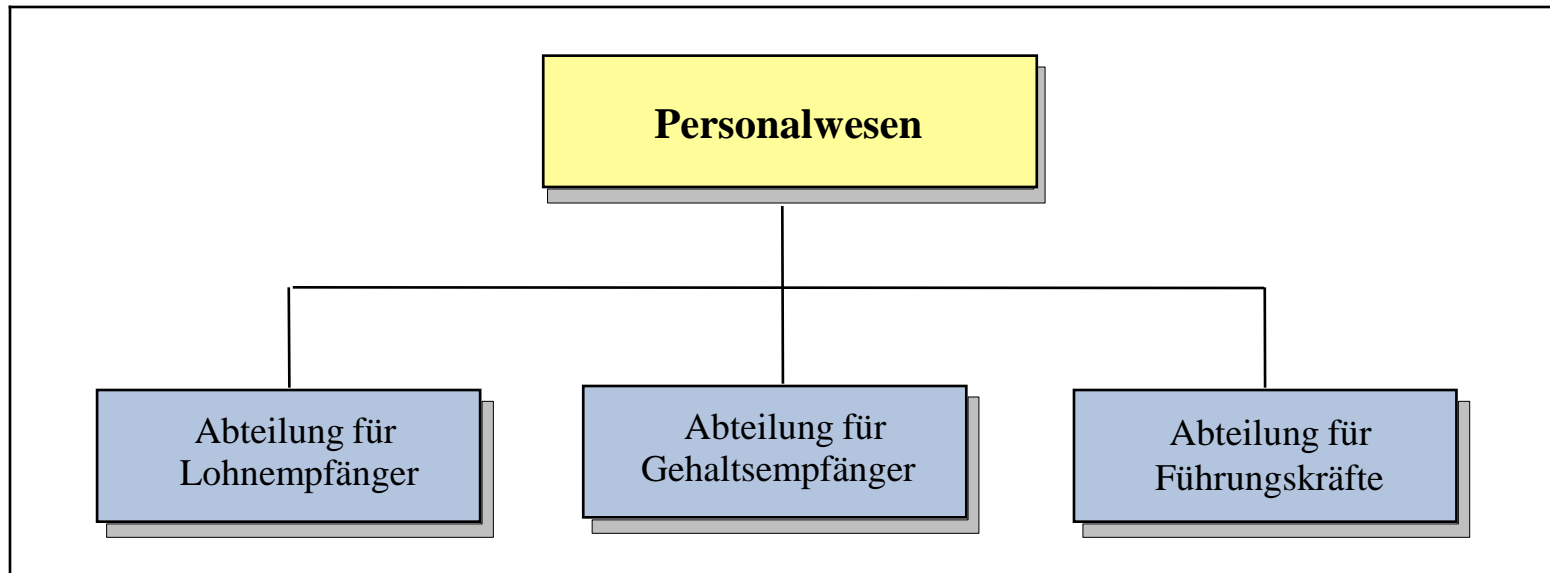



## 2. Nach beruflichen Tätigkeitsbereichen

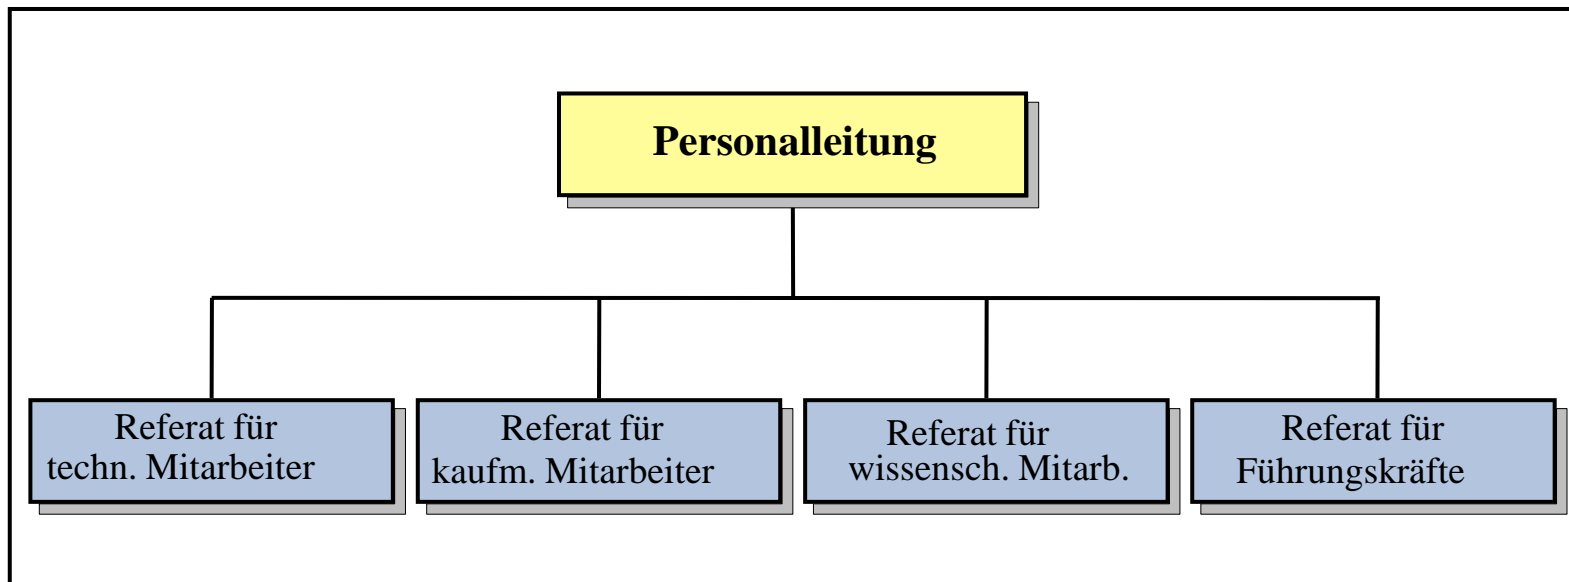

S. 39 Abb.30

Jung, Hans: Personalwirtschaft, 9. Aufl., München 2010.

© Oldenbourg Wissenschaftsverlag



### 3. Organisation des Personalwesens nach Unternehmensbereichen

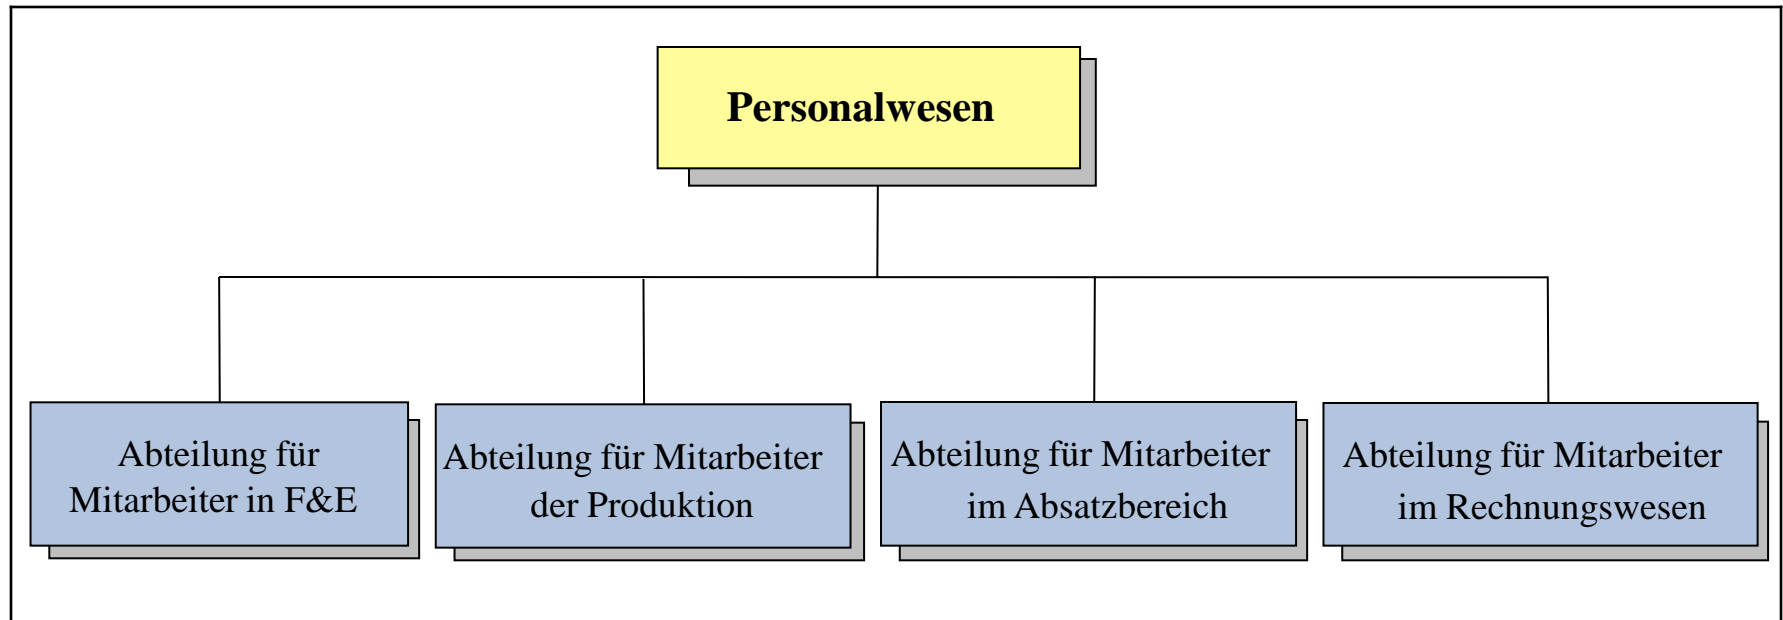

S. 40 Abb. 31

Jung, Hans: Personalwirtschaft, 9. Aufl., München 2010.

© Oldenbourg Wissenschaftsverlag



4. Das divisionale Referentensystem

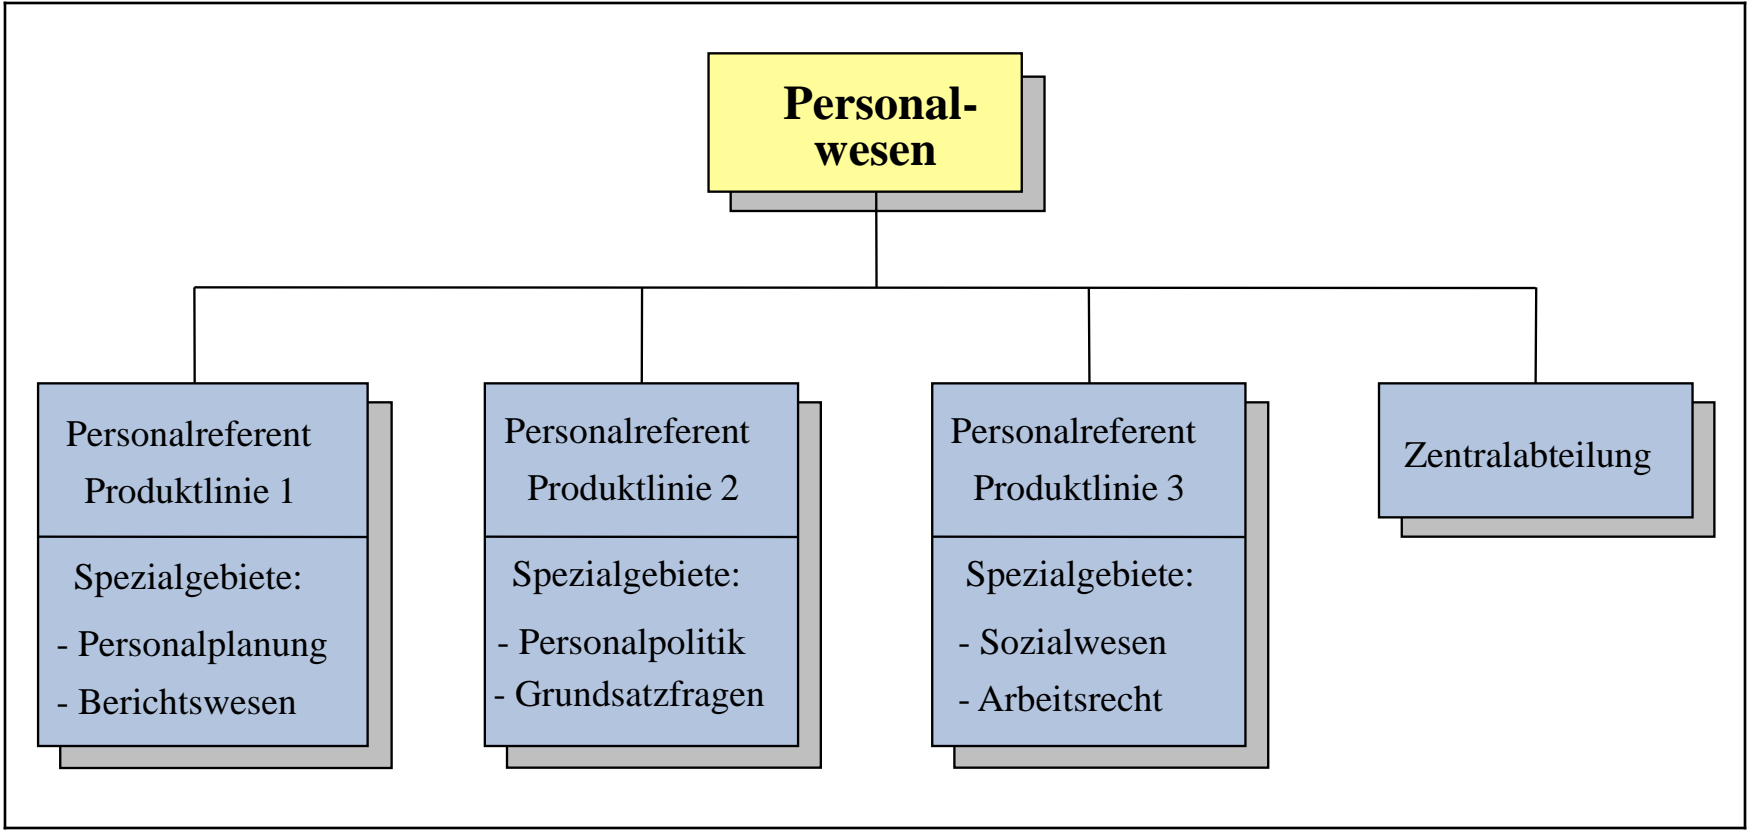

S. 40 Abb. 32



Bewertungskriterien der Organisationsformen

| Bewertungskriterium                                                                  | funktionsorientiert | objektorientiert |
|--------------------------------------------------------------------------------------|---------------------|------------------|
| Einheitliche Regelungen                                                              | +                   | o                |
| Transparenz                                                                          | -                   | +                |
| Mitarbeiternähe                                                                      | -                   | +                |
| Kenntnis örtlicher Gegebenheiten                                                     | o                   | +                |
| Verbindlichkeit, Berechenbarkeit                                                     | o                   | -                |
| Abgrenzung der Aufgaben                                                              | +                   | o                |
| Produktivität                                                                        | +                   | o                |
| Flexibilität                                                                         | o                   | +                |
| Zusammenarbeit, Koordination                                                         | o                   | -                |
| Spezialisierung                                                                      | +                   | -                |
| Kompetenz, Herausforderung                                                           | o                   | +                |
| + gut geeignet                      o geeignet                      - nicht geeignet |                     |                  |

S. 42 Abb. 33

## C. Das Personalwesen als Matrixorganisation

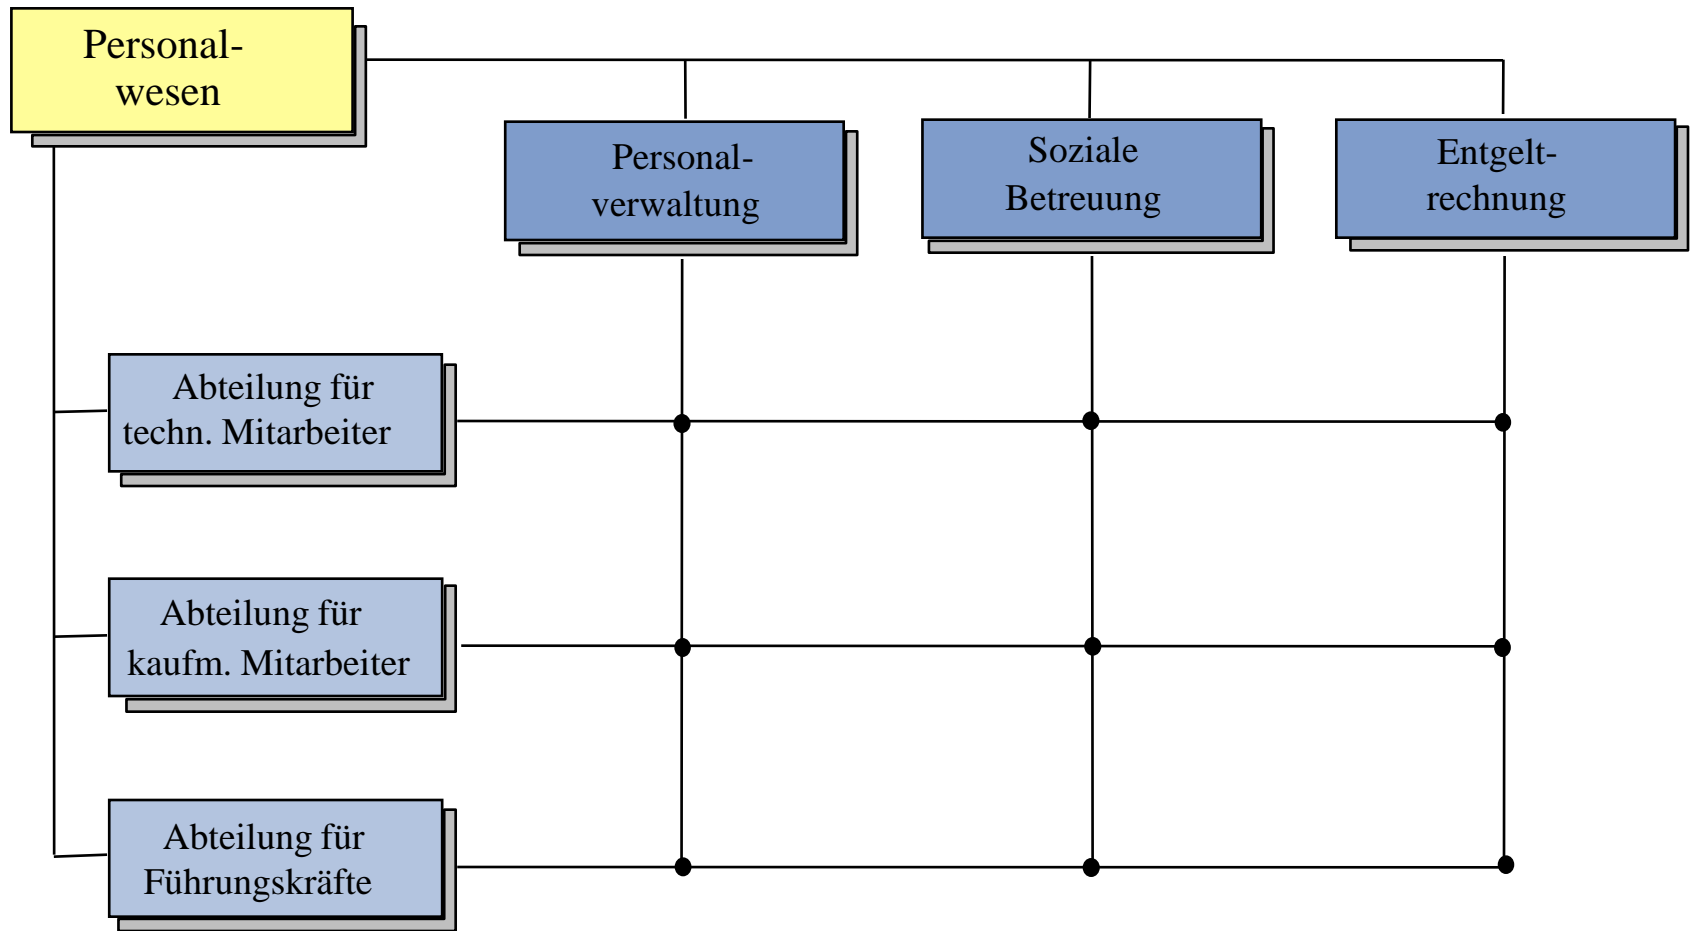

S. 42 Abb. 34



D. Gemischte Organisation

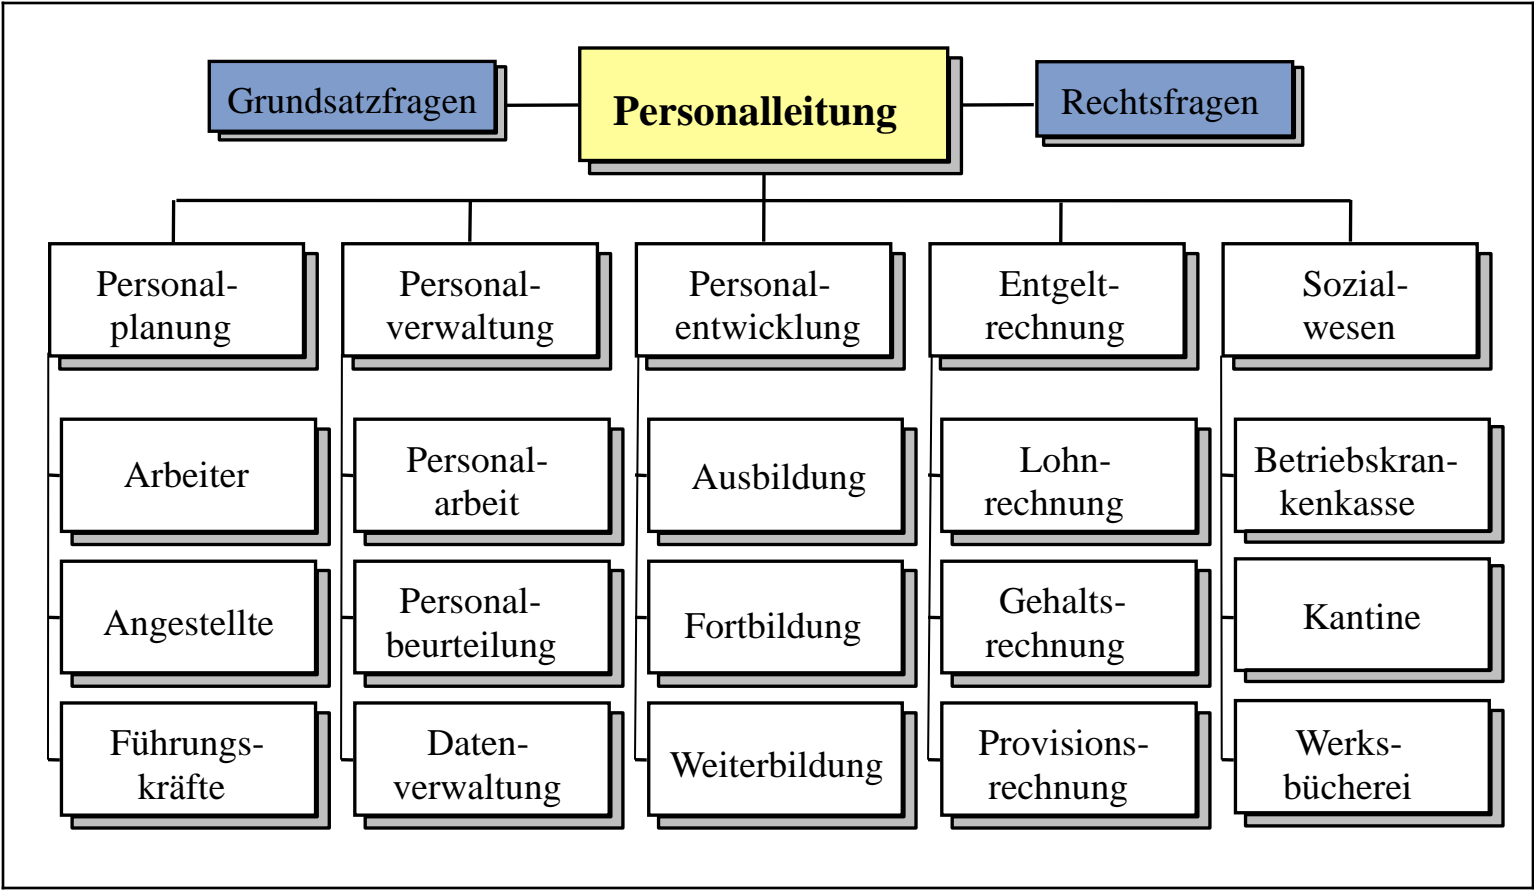

S. 43 Abb. 35



## E. Projektorganisation im Personalwesen

**Man unterscheidet die folgenden Erscheinungsformen:**

- **Unterstützung von Bereichsprojekten**
- **Personalbereichsinternes Projektmanagement**
- **Projektorientierte Personalorganisation**



## F. Weitere organisatorische Entwicklungen

Es bieten sich folgende Möglichkeiten an:

- (1) Die Entlastung der zentralen Personalabteilung durch Aufgabendelegation an nachgeordnete Personalabteilungen**
- (2) Die Umwandlung der Personalabteilung vom Cost-Center zum Profit-Center**
- (3) Investment – Center**
- (4) Das „Outsourcing“ von Funktionen des Personalwesens**
- (5) Das Shared-Service-Center**
- (6) Die virtuelle Personalabteilung**

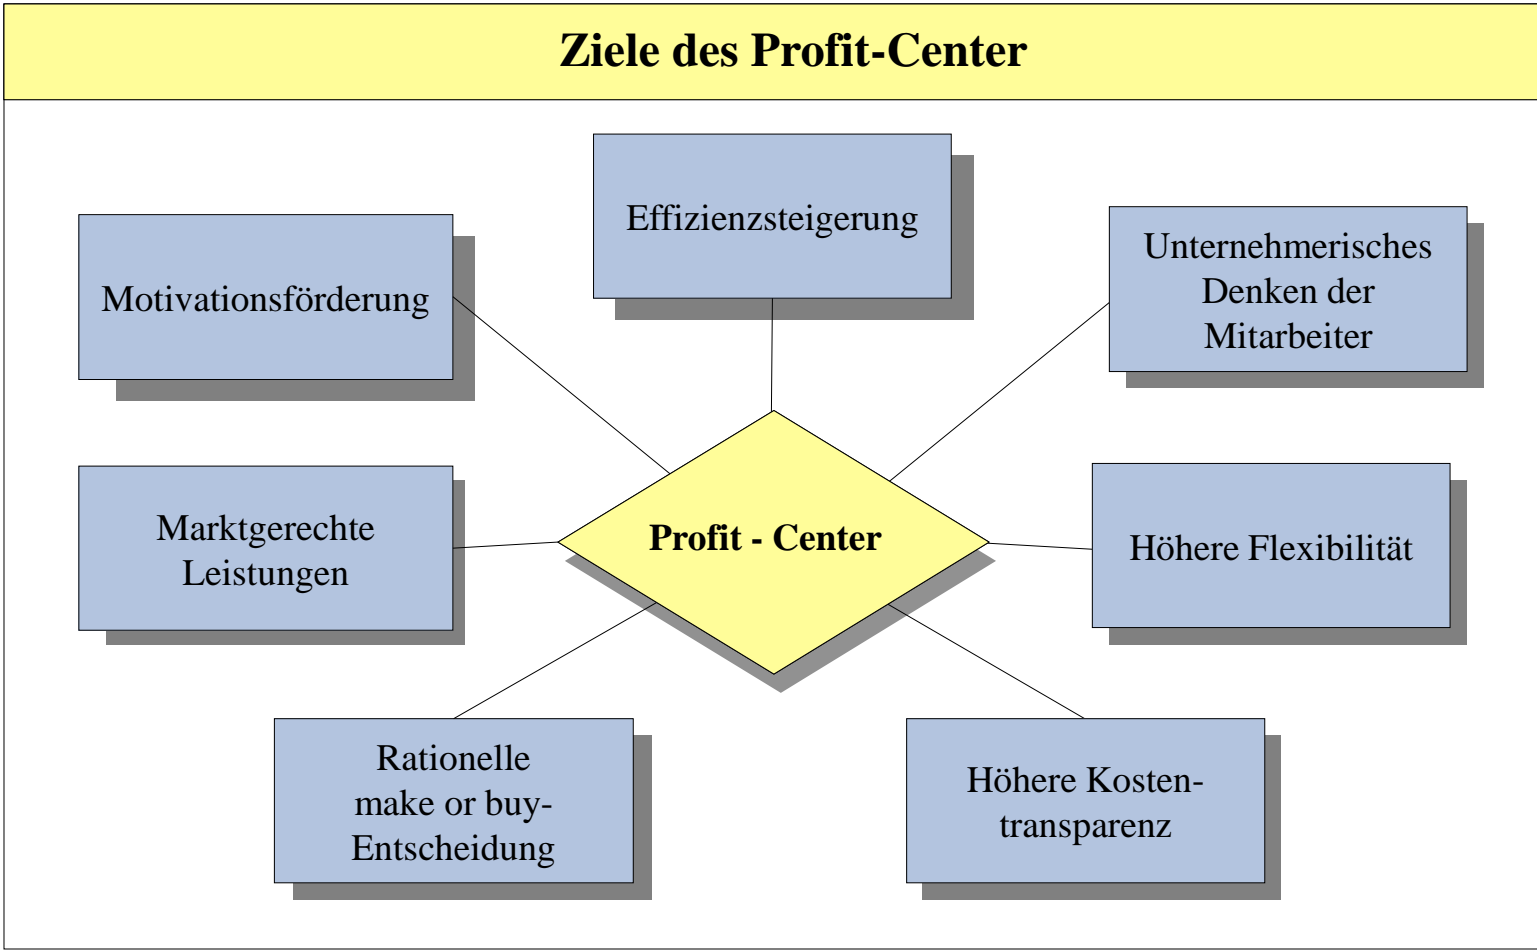

S. 47 Abb. 36





## Vier Ansätze eines Wertschöpfungs-Centers

|                                                                 |                                                                                   |
|-----------------------------------------------------------------|-----------------------------------------------------------------------------------|
| Senkung des Werteverzehrs                                       | Vermeidung von Verschwendung und Reduzierung von direkt anfallenden Kosten        |
| Optimierung bereichsinterner Erstellungs- und Beratungsprozesse | Zur Schonung finanzieller, personeller und zeitlicher Ressourcen                  |
| Verbesserung der Effektivität                                   | Von erbrachten Leistungen, indem sie den Vorstellungen der Nachfrager entsprechen |
| Innerbetriebliche Verrechnung der Leistung                      | Deckungsbeiträge, die einen messbaren Ertrag erwirtschaften                       |

S. 48 Abb. 37

(in Anlehnung an: Wunderer, R./Arx von S.: Reorganisation des Personalbereichs zum Wertschöpfungs-Center. In: Innovative Personalorganisation, Neuwied/Kriftel/Berlin 1999., S. 89.)



## Personalwesen und "Outsourcing"

**Kernleistungen sind:**

- **Aufstellung von Grundsätzen zur Sicherstellung einer zukunftsorientierten Personal-, Sozial- und Bildungspolitik**
- **Vereinheitlichung des Personal-Marketing**
- **Beratung der Geschäftsführung und Vermittlung zwischen Geschäftsführung und Betriebsrat**
- **Sicherstellung der Durchführung von gesetzlichen Vorschriften bezüglich der Arbeitssicherheit und der betriebsärztlichen Versorgung**
- **Aufstellung von Richtlinien für Funktionsbereiche der Personalwirtschaft (z.B. Personalbeschaffung und -entwicklung, Entgeltfindung, Personalbeurteilung)**

## Formen des Outsourcing im Personalbereich

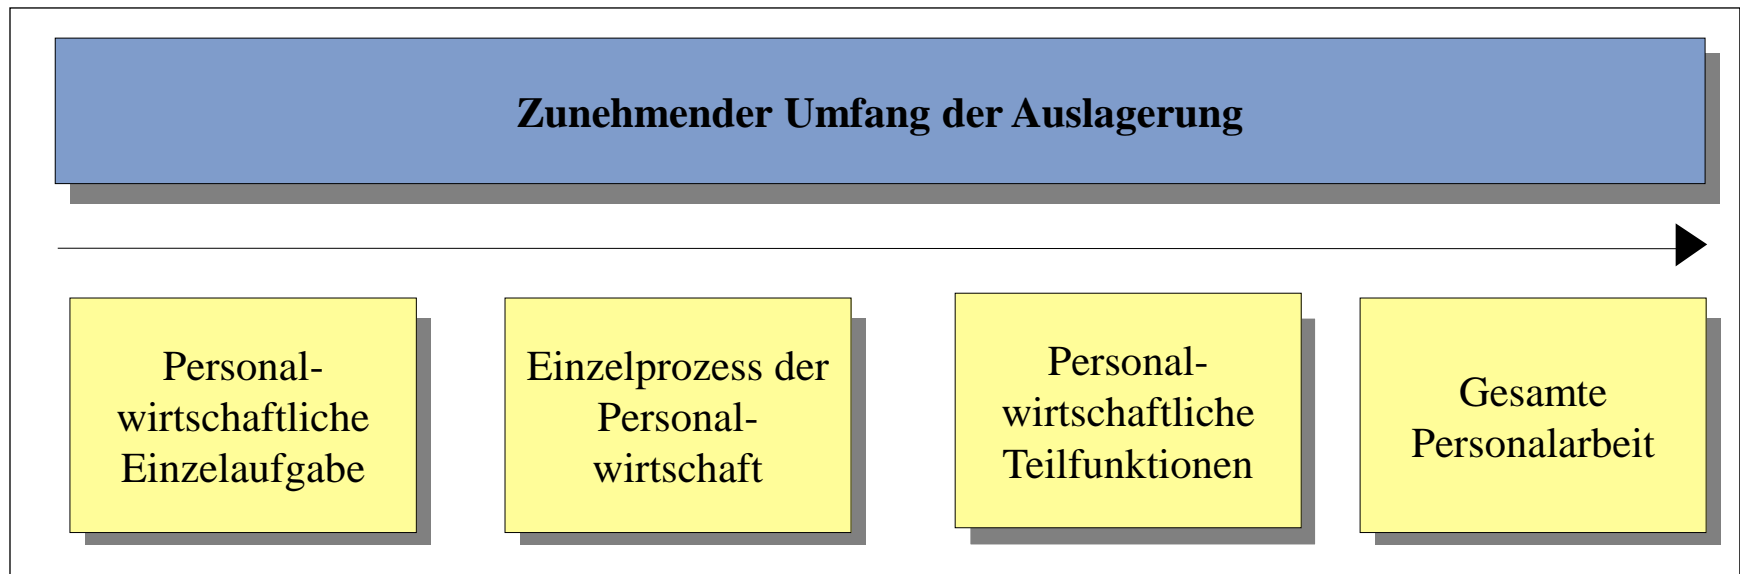

S. 50 Abb. 38  
(in Anlehnung an: Meckl, R. (Hrsg.): Personalarbeit und Outsourcing, Frechen 1999, S. 12.)



Die folgende Aufstellung nennt eine Auswahl an Dienstleistungsfunktionen, die sich in der Regel relativ problemlos auslagern lassen.

- **Personalbeschaffung**
- **Teilbereiche der Weiterbildung**
- **Kantinenbewirtschaftung**
- **Lohn- und Gehaltsabrechnung**

Daneben gibt es weitere Bereiche, die zumindest auf die Möglichkeit eines Outsourcing überprüft werden sollten (Beratungsdienste etc.).



## Fünf Schritte zum erfolgreichen Shared-Service-Center

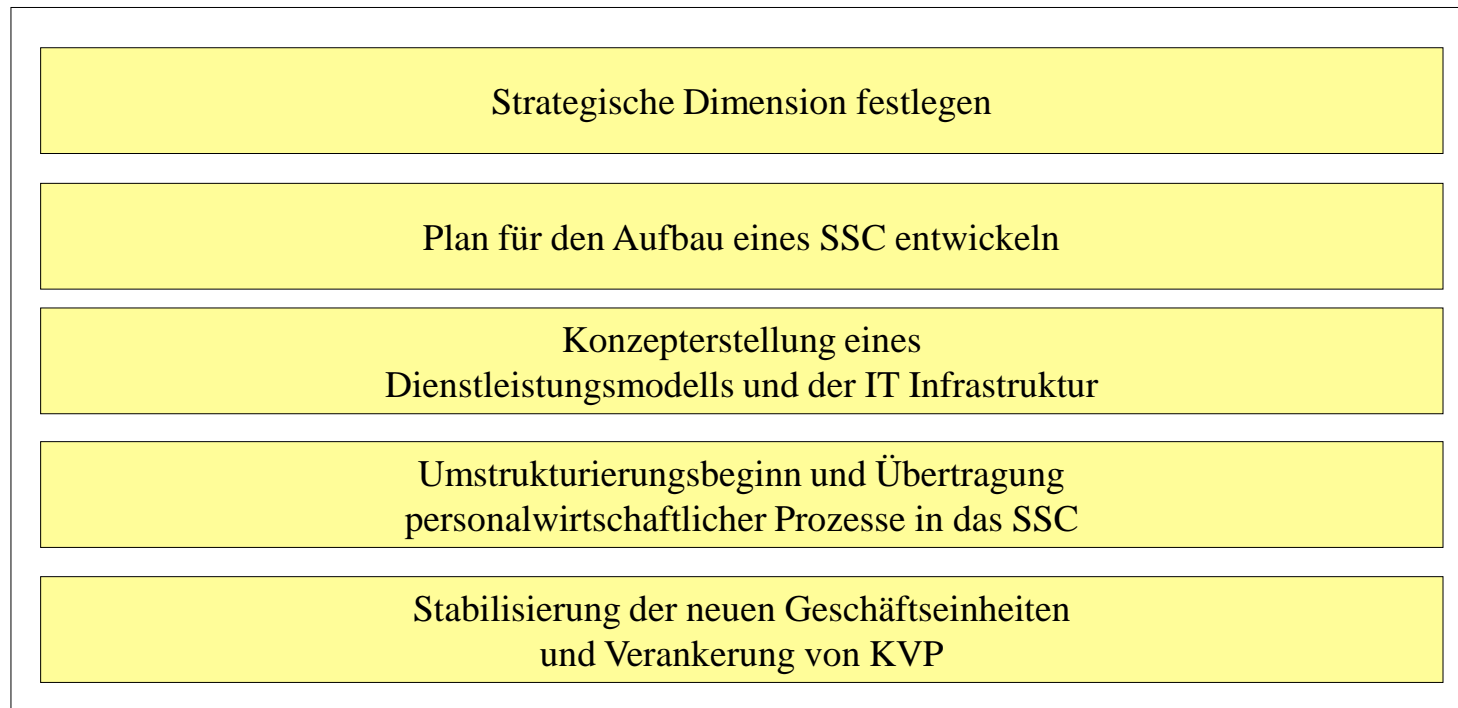

S. 53 Abb. 39

(in Anlehnung an: Segantini, L.: Nur die permanente Veränderung verspricht Erfolg. In: Personalwirtschaft, Heft 05/2005, S. 28.)

Jung, Hans: Personalwirtschaft, 9. Aufl., München 2010.

© Oldenbourg Wissenschaftsverlag



## Die virtuelle Personalabteilung

**1. Dimension:**

Professionelle Zielgliederung basierend auf Kernkompetenzen

**2. Dimension:**

Visionäre und unternehmenskulturelle Zusammenführung

**3. Dimension:**

Virtuelle Realisation



# Besetzung der Funktionsbereiche nach Größenklassen (in Prozent der Gesamtbelegschaft)

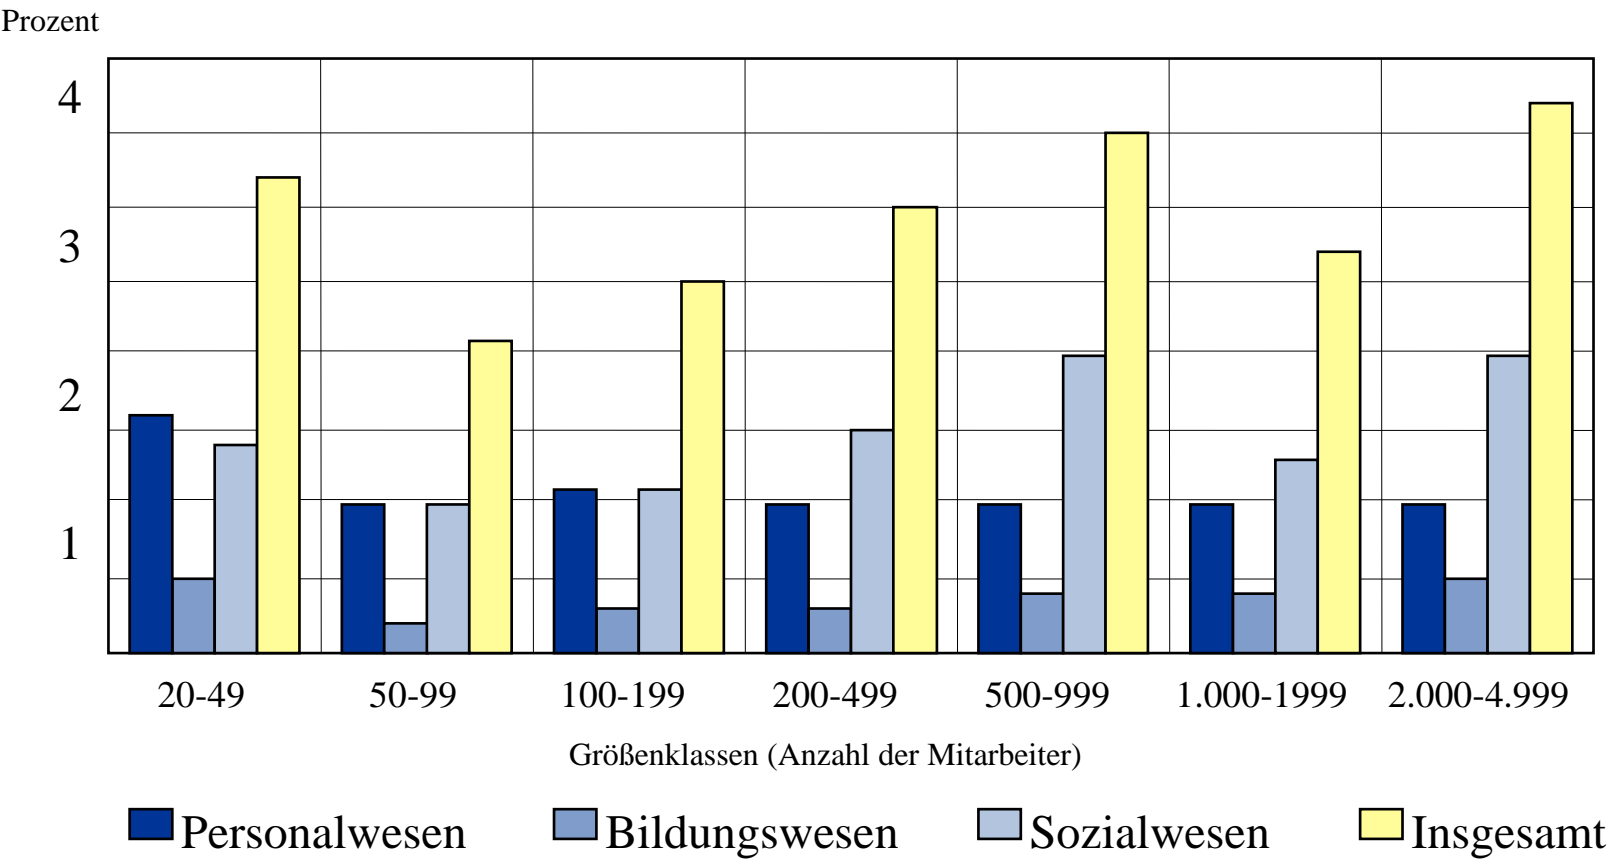

S. 55 Abb. 40

(in Anlehnung an: Segantini, L.: Nur die permanente Veränderung verspricht Erfolg. In: Personalwirtschaft, Heft 05/2005, S. 192)

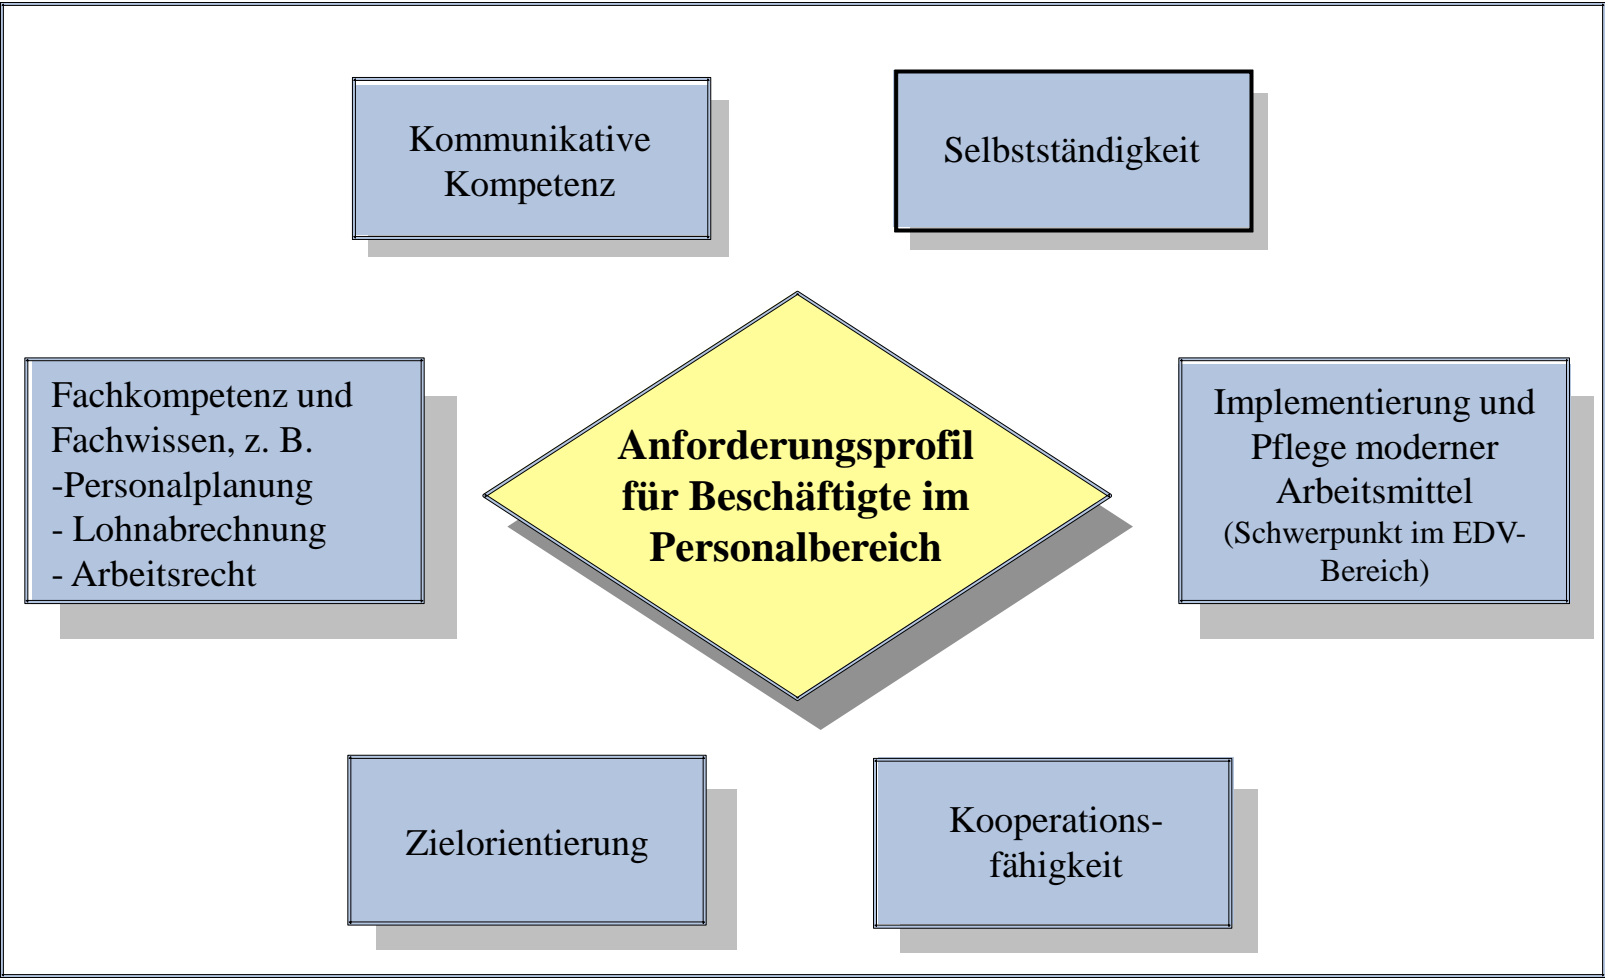

S. 56 Abb. 41



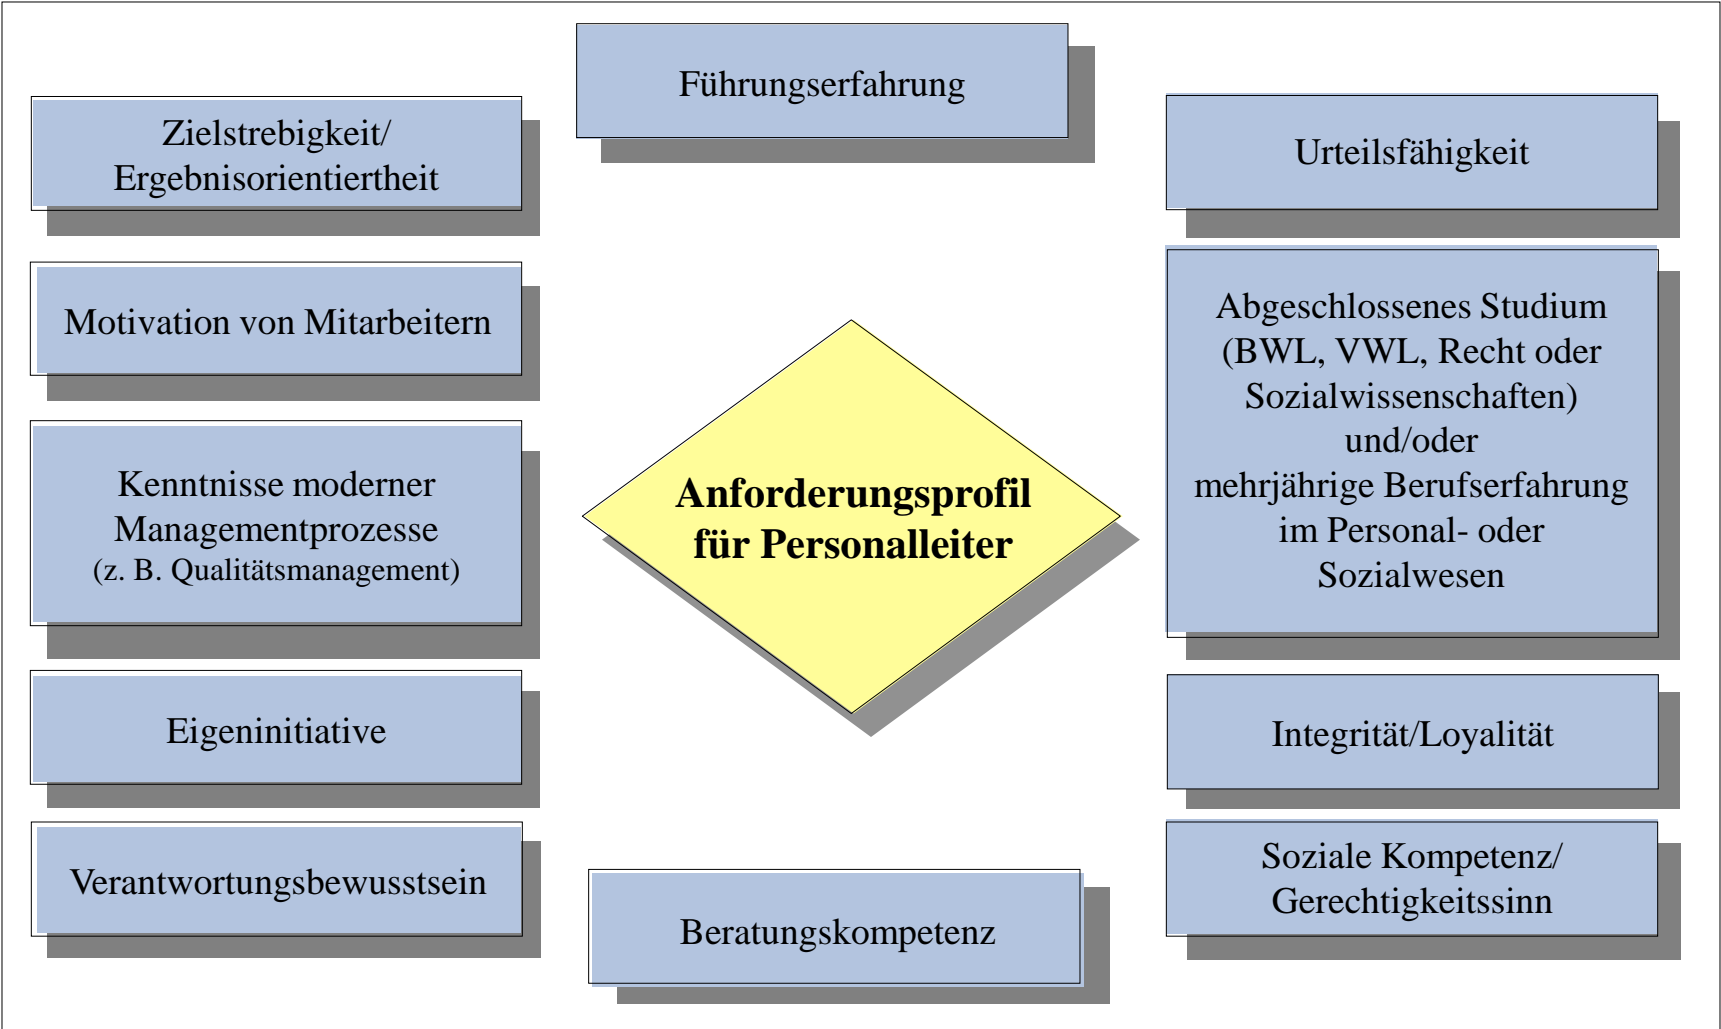

S. 57 Abb. 42



Vergütung von Personalleitern – Jahresgrundgehalt und variable Bezüge  
nach Unternehmensgröße in TEUR (Median)

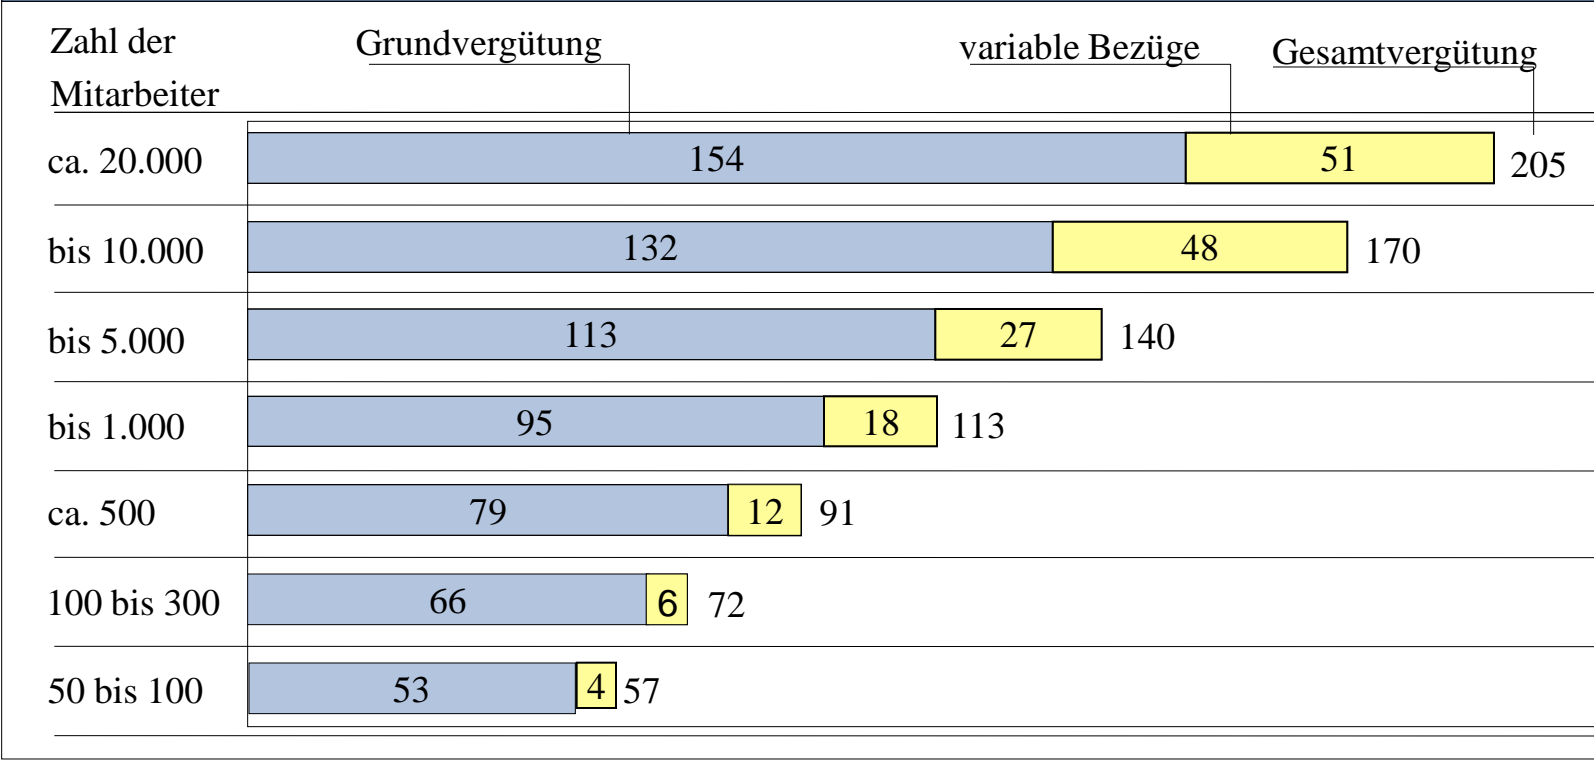

S. 57 Abb. 43

(Ergebnisse einer Umfrage der Managementberatung Hay Group: Es wurden die Daten von 126 Personalleitern aus Unternehmen aller Branchen und Größen in Deutschland verglichen. FAZ 03.07.2004)



## 3. Rechtsgrundlagen der Personalwirtschaft

- 3.1 Begriffe des Arbeitsrechts
- 3.2 Rechtsquellen
- 3.3 Das individuelle Arbeitsrecht
- 3.4 Das kollektive Arbeitsrecht
- 3.5 Mitbestimmung auf Betriebsebene
- 3.6 Mitbestimmung auf Unternehmensebene
- 3.7 Arbeitsgerichtsbarkeit
- 3.8 Sozialgerichtsbarkeit

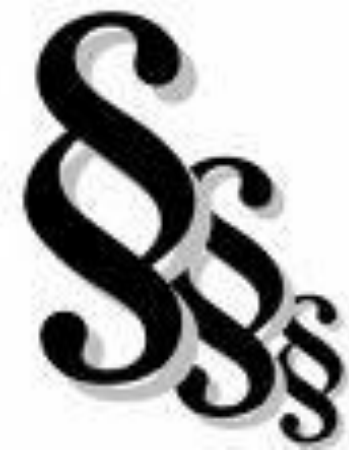



# 1. Grundlagen des Arbeitsrechts

Das Arbeitsrecht bildet den gesetzlichen Rahmen für die Personalwirtschaft. Es besteht aus zahlreichen Einzelgesetzen, Verordnungen, Tarifverträgen und Betriebsvereinbarungen und regelt die Beziehungen zwischen Arbeitgebern und Arbeitnehmern.

Das **Arbeitsrecht** beruht auf **zwei Teilbereichen**, dem individuellen und dem kollektiven Arbeitsrecht:

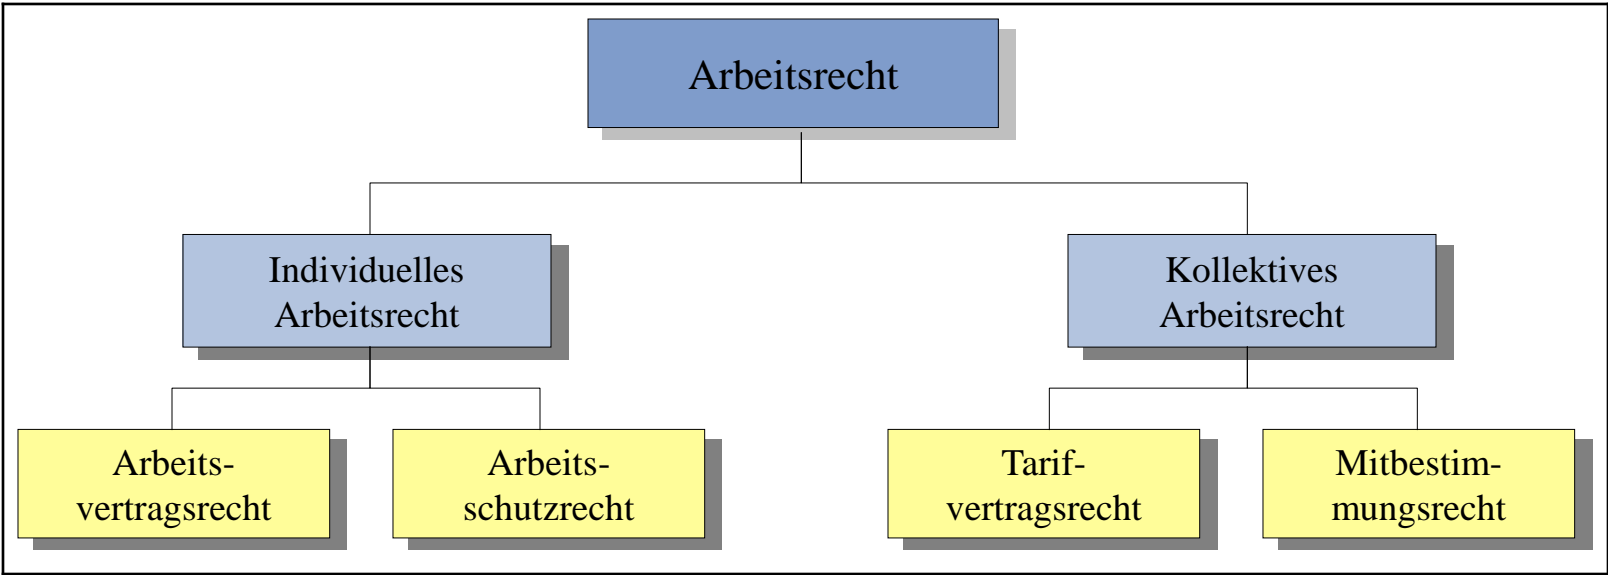

S. 58 Abb. 44



## Arbeitsrecht: Übersicht

- Das **Arbeitsrecht** lässt sich definieren als das "Sonderrecht der Arbeitnehmer" oder allgemeiner als das "Recht der Arbeitsverhältnisse".
- Das **Arbeitsrecht** regelt das Verhältnis zwischen Arbeitnehmern und Arbeitgebern  
und  
auch die Beziehungen zwischen deren Zusammenschlüssen, den Gewerkschaften  
und  
den Arbeitgeberverbänden.



## Der Arbeitnehmer

Als **Arbeitnehmer** im Sinne des Arbeitsrechts gilt jedoch nicht schon jeder, der im Rahmen eines Vertragsverhältnisses Arbeit für andere leistet. Entscheidend ist, ob die Arbeit im Dienst eines anderen, in einem Abhängigkeitsverhältnis und damit fremdbestimmt und nicht selbständig geleistet wird.

Im Zweifelsfall ist die Unterscheidung zwischen Arbeitnehmer und Selbständigem anhand der folgenden Kriterien möglich:

- Umfang der Weisungsgebundenheit (z.B. bezüglich Arbeitszeit und -inhalt)
- Eingliederung in die betriebliche Organisation bzw. in den Arbeitsablauf
- Dauer und Lage der Arbeitszeit

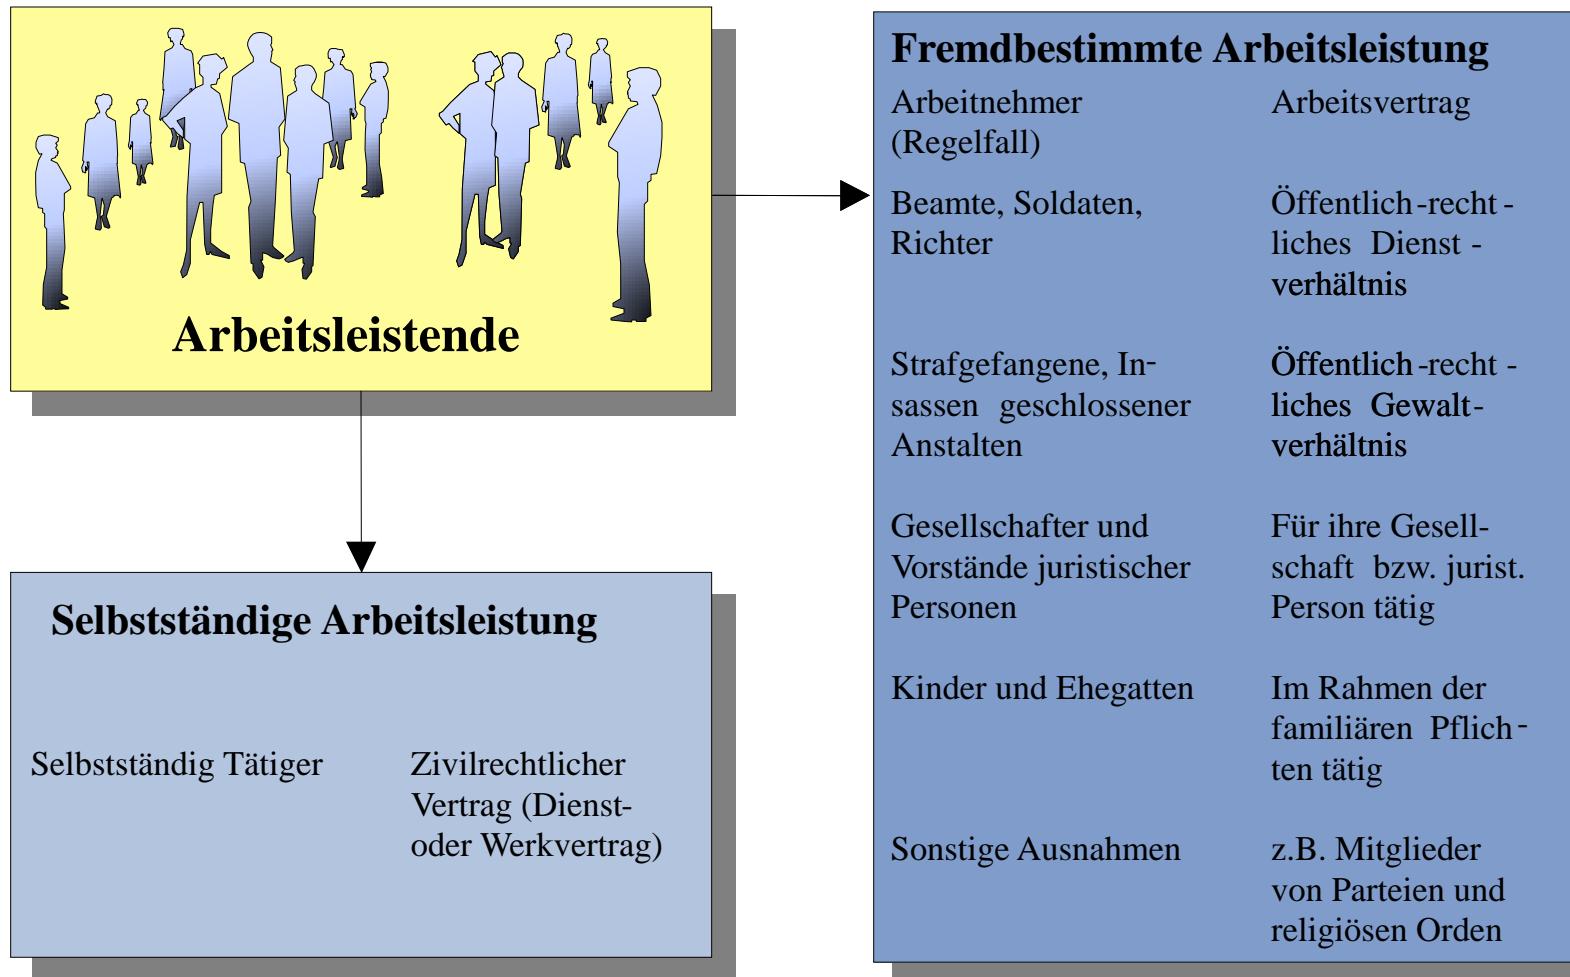

S. 59 Abb. 45



## Rechtsquellen

- Das Arbeitsrecht verfügt nicht, wie z.B. das Strafrecht mit dem Strafgesetzbuch (StGB), über ein spezielles Gesetz; es wird vielmehr durch eine Vielzahl verschiedener Gesetze und Sonderregelungen bestimmt, die sich in folgenden rechtsverbindlichen Schriften wiederfinden:

- Europarecht
- Das Grundgesetz
- Andere Gesetze und Rechtsverordnungen
- Tarifverträge und Betriebsvereinbarungen
- Der Einzelarbeitsvertrag
- Rechtsnormähnliche Gestaltungsmittel





## Europarecht

- Das Europarecht nimmt neben dem internationalen Recht in unterschiedlicher Weise Einfluss auf die nationalen arbeitsrechtlichen Vorschriften.
- Der EG-Vertrag enthält in Art. 39 ff EGV (Regeln über Freizügigkeit von Arbeitnehmern) und Art. 141 EGV (Lohngleichheit von Männern und Frauen) arbeitsrechtliche Regelungen. Darüber hinaus wird durch den Erlass von Richtlinien als Teil des sekundären Gemeinschaftsrechts der nationale Gesetzgeber verpflichtet, bestehende Gesetze zu modifizieren oder neue Regelungen zu schaffen.
- Der nationale Gesetzgeber hat u.a. daraus resultierend das Teilzeit- und Befristungsgesetz und das Nachweisgesetz verabschiedet.

**Neben diesen Kodifizierungen wird das Arbeitsrecht durch die Rechtsprechung des Europäischen Gerichtshofes beeinflusst.**



## Gewerkschaft und Arbeitgeberverband

- Unter einer **Gewerkschaft** wird allgemein ein Zusammenschluss von Arbeitnehmern verstanden, der die wirtschaftlichen, sozialen und kulturellen Interessen seiner Mitglieder vertritt.
- Die Mitgliedschaft in einer Gewerkschaft ist freiwillig.
- Ebenso wie die Arbeitnehmer haben sich auch die Arbeitgeber zu sog. **Arbeitgeberverbänden**, die fachlich und regional gegliedert sind, zusammengeschlossen.
- Als bundesweite Dachorganisation dient die Bundesvereinigung der Deutschen Arbeitgeberverbände (BDA), der ca. 800 Einzelverbände angehören.



## Das Grundgesetz

Das Grundgesetz enthält zwar keinen eigenen Abschnitt über die Arbeits- und Sozialordnung, legt jedoch als ranghöchstes Gesetz in den folgenden Artikeln wichtige Rahmenbedingungen für das Arbeitsrecht fest:

### **Artikel 1, Absatz 1 GG:**

Die Würde des Menschen ist unantastbar. Sie zu achten und zu schützen ist Verpflichtung aller staatlichen Gewalt.

### **Artikel 2 GG:**

- (1) Jeder hat das Recht auf die freie Entfaltung seiner Persönlichkeit, soweit er nicht die Rechte anderer verletzt und nicht gegen die verfassungsmäßige Ordnung oder das Sittengesetz verstößt.
- (2) Jeder hat das Recht auf Leben und körperliche Unversehrtheit. Die Freiheit der Person ist unverletzlich. In diese Rechte darf nur auf Grund eines Gesetzes eingegriffen werden.

### **Artikel 3, Absatz 2 GG:**

Männer und Frauen sind gleichberechtigt.



(Fortsetzung)

**Artikel 9, Absatz 3 GG:**

Das Recht, zur Wahrung und Förderung der Arbeits- und Wirtschaftsbedingungen Vereinigungen zu bilden, ist für jedermann und alle Berufe gewährleistet. Abreden, die dieses Recht einschränken oder zu behindern suchen, sind nichtig, hierauf gerichtete Maßnahmen sind rechtswidrig

**Artikel 11, Absatz 1 GG:**

Alle Deutschen genießen Freizügigkeit im ganzen Bundesgebiet.

**Artikel 12 GG:**

- (1) Alle Deutschen haben das Recht, Beruf, Arbeitsplatz und Ausbildungsstätte frei zu wählen.
- (2) Niemand darf zu einer bestimmten Arbeit gezwungen werden, außer im Rahmen einer herkömmlichen, allgemeinen, für alle gleichen öffentlichen Dienstleistungspflicht.
- (3) Zwangsarbeit ist nur bei einer gerichtlich angeordneten Freiheitsentziehung zulässig.

**Das Grundgesetz hat höchste Priorität. Sämtliche Rechtsnormen, Gesetze und Vereinbarungen sind nichtig, wenn sie gegen das Grundgesetz verstoßen.**



## Betriebsvereinbarungen

**Geltungsbereich** ist der jeweilige Betrieb für den sie abgeschlossen wurde. Gesamt- und Konzernbetriebsvereinbarungen gelten unternehmens- bzw. konzernweit.

- Gilt unmittelbar und zwingend für **alle** Arbeitnehmer (keine ltd. Angestellten)
- **Inhalt einer Betriebsvereinbarung** können alle Fragen sein, bei denen dem Betriebsrat ein gesetzliches Mitbestimmungsrecht zusteht. Zu unterscheiden sind erzwingbare Betriebsvereinbarungen und freiwillige Betriebsvereinbarungen.
- Bei fehlender Einigung zwischen Arbeitgeber und Betriebsrat ist der Spruch der **Einigungsstelle** (paritätisch zusammengesetzt, neutr. Vorsitzender) entscheidend.
- Sie bedürfen der **Schriftform**, Rechtsgrundlage ist § 77 Betriebsverfassungsgesetz



## Gesetze und Rechtsverordnungen

- Das **BGB** enthält insbesondere die Grundlagen des Arbeitsvertragsrechts, bei dem neben den Bestimmungen zum Dienstvertrag (§§ 611 ff. BGB) auch der allgemeine Teil des BGB und der allgemeine Teil des Schuldrechts von Bedeutung sind.
- Das **HGB** regelt die Bestimmungen über die Rechtsverhältnisse der kaufmännischen Angestellten im Handelsgewerbe, z.B. Buchhalter, Verkäufer(in) etc. Von besonderer Bedeutung sind hier die §§ 59 ff. HGB.
- **Rechtsvorschriften** für die in einem Gewerbebetrieb beschäftigten Arbeitnehmer (Fabrikarbeiter, Meister, Gesellen, technische Angestellte etc.) sind in der GewO, insbesondere in den §§ 105 ff. GewO, enthalten.
- **Das Allgemeine Gleichbehandlungsgesetz (AGG)**

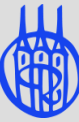

## Tarifverträge

Der Betrieb muss im **Geltungsbereich** des Tarifvertrags liegen und beide Vertragsparteien Mitglied eines tarifschließenden Verbandes sein.

➤ Gilt unmittelbar und zwingend

**Inhalt:** Rechte und Pflichten der Tarifvertragsparteien sind hier geregelt. Er enthält aber auch Rechtsnormen über den Inhalt, Abschluss und Beendigung von Arbeitsverträgen sowie Regelungen betrieblicher und betriebsverfassungsrechtlicher Fragen.

**Arten:** Manteltarifvertrag, Rahmentarifvertrag, Lohn- und Gehaltstarifvertrag, Flächentarifvertrag, Firmentarifvertrag

Tarifverträge bedürfen der **Schriftform**, Rechtsgrundlage ist das Tarifvertragsgesetz (TVG)



## Der Einzelarbeitsvertrag

- Er regelt die individuelle Ausgestaltung eines Arbeitsverhältnisses durch Abschluss eines Einzelarbeitsvertrages zwischen Arbeitgeber und Arbeitnehmer.
- Einzelne Bestimmungen dürfen *nicht zu Ungunsten* des Arbeitnehmers von gesetzlichen oder tarifvertraglichen Bestimmungen (z.B. Kündigungsfrist, Probezeit) abweichen.
- Einzelvertragliche Vereinbarungen, die für den Arbeitnehmer *günstiger* als z.B. kollektivvertragliche Regelungen ausfallen (z.B. übertarifliche Zulagen, Zuschüsse zu den Fahrt-, Wohn- und Essenskosten), sind dagegen gestattet.
- Einzelarbeitsverträge, in denen alle das Arbeitsverhältnis betreffende Regelungen individuell festgelegt werden, sind heute *nicht mehr üblich*, man bezieht sich in den häufig verwendeten Formulararbeitsverträgen in der Regel auf Gesetze, Tarifverträge und Betriebsvereinbarungen.





## Rechtsnormähnliche Gestaltungsmittel

Einige Gestaltungsmittel, die auf das Arbeitsverhältnis einwirken, gelten nicht als allgemein verbindliche Rechtsnormen. Man spricht dann von rechtsnormähnlichen Gestaltungsmitteln, zu denen die folgenden Bereiche zählen:

- **Betriebliche Übung:** Wenn der Arbeitgeber ein bestimmtes Verhalten über einen längeren Zeitraum ohne ausdrückliche Vereinbarung zwischen Arbeitgeber und Arbeitnehmer praktiziert und der Arbeitnehmer davon ausgehen kann, dass der Arbeitgeber auch in Zukunft so verfahren wird, spricht man von einer betrieblichen Übung
- **Das Direktionsrecht des Arbeitgebers:** Als Direktions- oder Weisungsrecht wird das Recht des Arbeitgebers zur Bestimmung der Art, des Ortes und der Zeit sowie von allgemeinen Verhaltensregeln bezüglich der Leistungserbringung bezeichnet.
- **Der Gleichbehandlungsgrundsatz:** Der Gleichbehandlungsgrundsatz ist im Gegensatz zum Gleichheitssatz (Artikel 3 Abs. 1 GG) und zur Gleichberechtigung (Artikel 3 Abs. 2 GG) ein arbeitsrechtlicher Rechtsgrundsatz, der in § 4 Teilzeit- und Befristungsgesetz (TzBfG) und § 75 BetrVG verankert ist. Der Gleichbehandlungsgrundsatz verpflichtet den Arbeitgeber, alle Arbeitnehmer gleich zu behandeln, solange nicht sachliche Gesichtspunkte dagegen sprechen.  
(siehe auch Gleichbehandlungsgesetz)

S. 63 ff.



## Die Rechtsprechung

- Weite Teile des Arbeitsrechts sind gegenwärtig überhaupt nicht gesetzlich geregelt oder beinhalten in erheblichem Maße unbestimmte Rechtsbegriffe, die in ihrer Auslegung unklar sind.
- Gerichtsentscheidungen schließen daher Lücken, so dass das Richterrecht im Arbeitsrecht einen hohen Stellenwert hat. Insbesondere die Haftung des Arbeitnehmers und das Arbeitskampfrecht bedürfen der Fallweisen Klärung durch die Rechtsprechung.



## Gesetzliche Kollisionen

- Die genannten Rechtsquellen können widersprüchliche Regelungen beinhalten, auch kann es zu Überschneidungen zwischen Kollektiv- und Individualrecht kommen.
- In diesen Fällen muss dann geklärt werden, welche Rechtsquelle für den betreffenden Einzelfall Gültigkeit hat. Zur Klärung dieser Fragestellung gelten verschiedene Grundsätze:



## Grundsätze der Gültigkeit von Rechtsquellen

### **Rangprinzip**

Rechtsnormen haben untereinander eine Rechtsfolge.  
Eine ranghöhere verdrängt die rangniedrigere Norm.

### **Günstigkeitsprinzip**

Das Rangprinzip ist richtig, wenn eine rangniedrigere  
Norm für den Arbeitnehmer günstiger ist.

### **Spezialitätsgrundsatz**

Bei gleichrangigen Normen wird die allgemeinere durch  
die spezieller Norm verdrängt.

### **Erneuerungsprinzip**

Eine neuere verdrängt die ältere Regelung

### **Grundsatz vom Vorrang des Bundesrechts**

Bundesrecht hat Vorrang vor Landesrecht (Artikel 31 GG).



# Das individuelle Arbeitsrecht

## Arbeitsvertragsrecht

**Grundlagen:**

- das Bürgerliche Gesetzbuch (**BGB**) mit den Bestimmungen für den Dienstvertrag (§§ 611 - 630)
- das Handelsgesetzbuch (**HGB**) mit den gesetzlichen Grundlagen für Handlungsgehilfen und Handlungslehrlinge in einem Handelsgewerbe (§§ 59 ff.)
- die Gewerbeordnung (**GewO**), die die Stellung des Arbeitnehmers regelt.

## Arbeitsschutzrecht

### Allgemeine Vorschriften

- Betriebs-/Gefahrenschutz
- Arbeitsstättenverordnung
- Arbeitssicherheitsgesetz
- Arbeitszeit- u. Ladenschlussgesetz

### Sondervorschriften

- Schutz Jugendlicher
- Schutz Schwerbehinderter
- Sonderschutz für Frauen
- Arbeitsplatzschutz



## Formen des Arbeitsvertrages

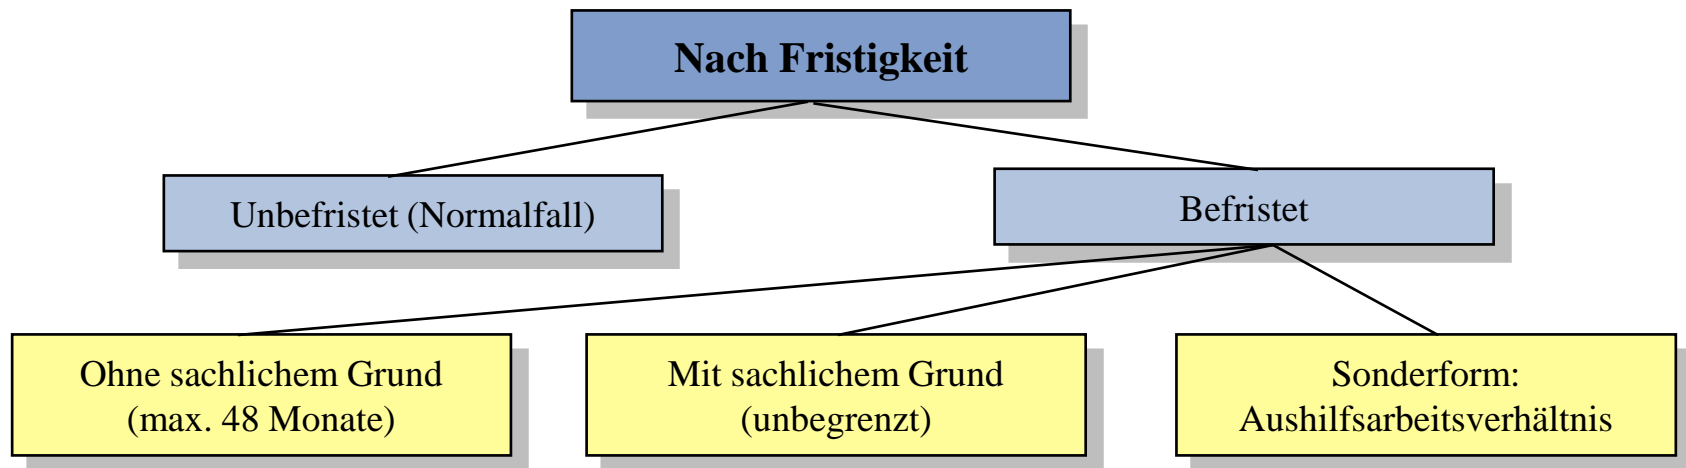

- Ein **Probearbeitsverhältnis** wird im Tarifvertrag, in einer Betriebsvereinbarung oder im Einzelarbeitsvertrag festgelegt. Gesetzlich vorgeschrieben ist es für Auszubildende (§§ 13, 18 BBiG).

Die normalerweise drei- bis sechsmonatige Probezeit dient zur Beurteilung des Arbeitnehmers bzw. der Betriebsverhältnisse.

- **Teilzeitarbeitsverhältnisse** liegen vor, wenn die betriebsübliche Arbeitszeit dauerhaft unterschritten wird. (Bei vorübergehender Unterschreitung handelt es sich um Kurzarbeit).

## Rechte und Pflichten aus dem Arbeitsverhältnis

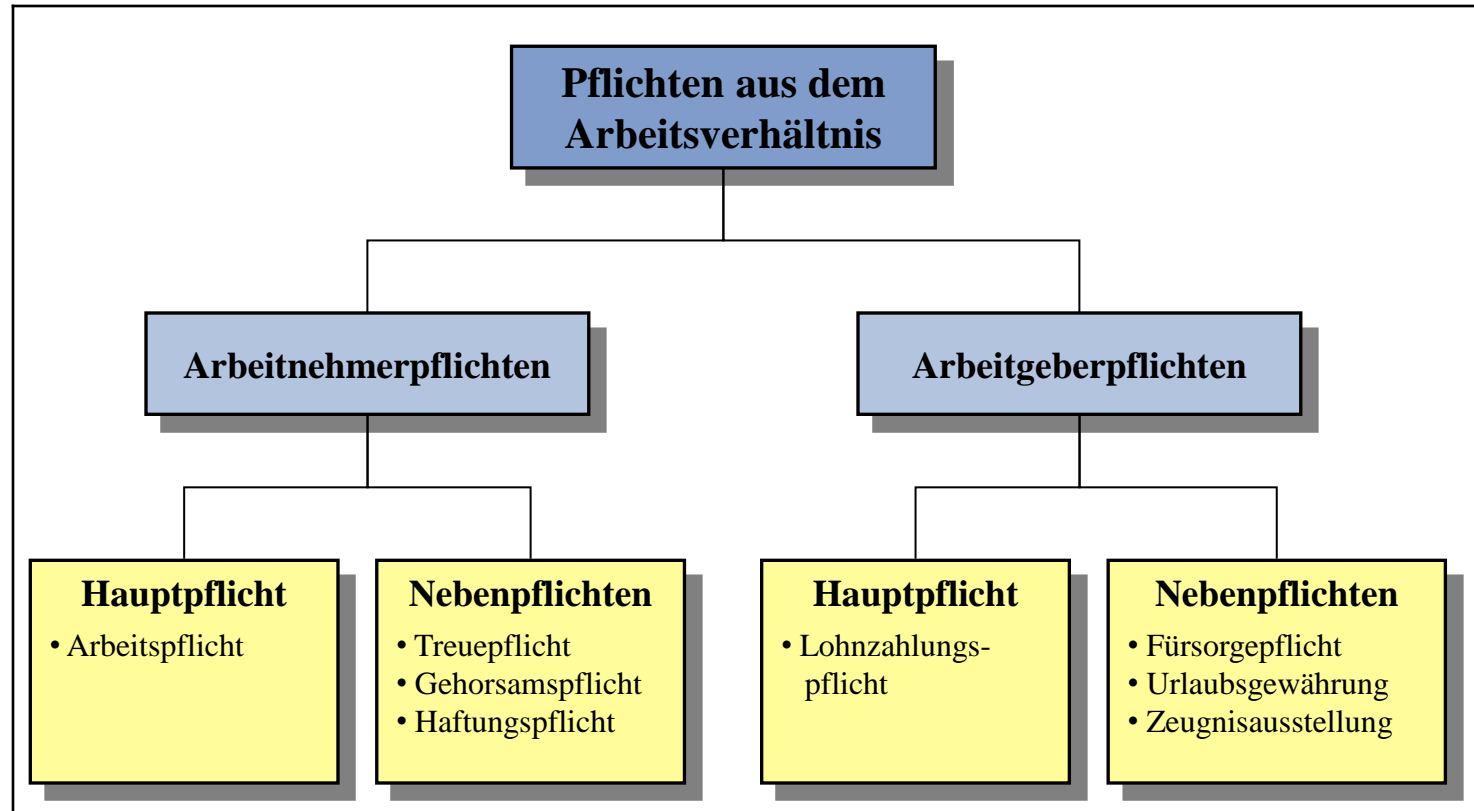

S. 66 Abb. 48

Jung, Hans: Personalwirtschaft, 9. Aufl., München 2010.

© Oldenbourg Wissenschaftsverlag



**Nebenbeschäftigung:** zusätzliche Tätigkeiten für einen anderen Arbeitgeber – zulässig wenn:

- die vorgeschriebenen Arbeitszeitgrenzen nicht überschritten werden
- sie nicht während einer Erkrankung oder im Urlaub erfolgen
- sie die Interessen des Hauptarbeitgebers nicht beeinträchtigen
- nicht im Tarifvertrag, in Betriebsvereinbarung oder im Einzelarbeitsvertrag ausgeschlossen

Beim **Job-Sharing** teilen sich mehrere Arbeitnehmer einen Arbeitsplatz und die dazugehörigen Rechte und Pflichten.

**Leiharbeit** ist die Abgabe eines Arbeitnehmers zur Leistung von Diensten an einen Dritten. Sie ist im Arbeitnehmerüberlassungsgesetz (AÜG) geregelt.





## Pflichten des Arbeitnehmers

Die **Hauptpflicht des Arbeitnehmers** besteht nach §§ 611 Abs. 1, 613 BGB in der persönlichen Erbringung der versprochenen Dienste. Welche Arbeit er an welchem Ort und zu welcher Zeit zu leisten hat, ergibt sich in erster Linie aus dem Arbeitsvertrag. Sind dort keine Regelungen getroffen, bestimmt der Arbeitgeber im Rahmen seines Weisungs- und Direktionsrechts (z.B. § 121 GewO).

Aus der **Treuepflicht** ergeben sich **Unterlassungs-** und **Verhaltenspflichten**.

- Die **Unterlassungspflichten** bestehen in der Hauptsache aus der Verschwiegenheitspflicht, dem Verbot der Annahme von Schmiergeldern und dem Verbot, in einen direkten Wettbewerb gegen den Arbeitgeber zu treten (vgl. §§ 60 und 61 HGB).
- Die **Verhaltenspflichten** bestehen hauptsächlich aus Mitteilungs- und Anzeigepflichten, nach denen der Arbeitnehmer Unregelmäßigkeiten im Betriebsablauf melden muss, um z.B. drohenden Schädigungen vorzubeugen.

Die **Gehorsamspflicht** des Arbeitnehmers ist das Gegenstück zum Direktionsrecht des Arbeitgebers. Der Arbeitnehmer hat Weisungen bezüglich der Art seiner Tätigkeit und seines Verhaltens im Betrieb zu befolgen, sofern diese nicht gegen Gesetze, Verordnungen oder Verträge (Tarifvertrag, Einzelarbeitsvertrag) verstoßen.



# Haftungspflicht des Arbeitnehmers

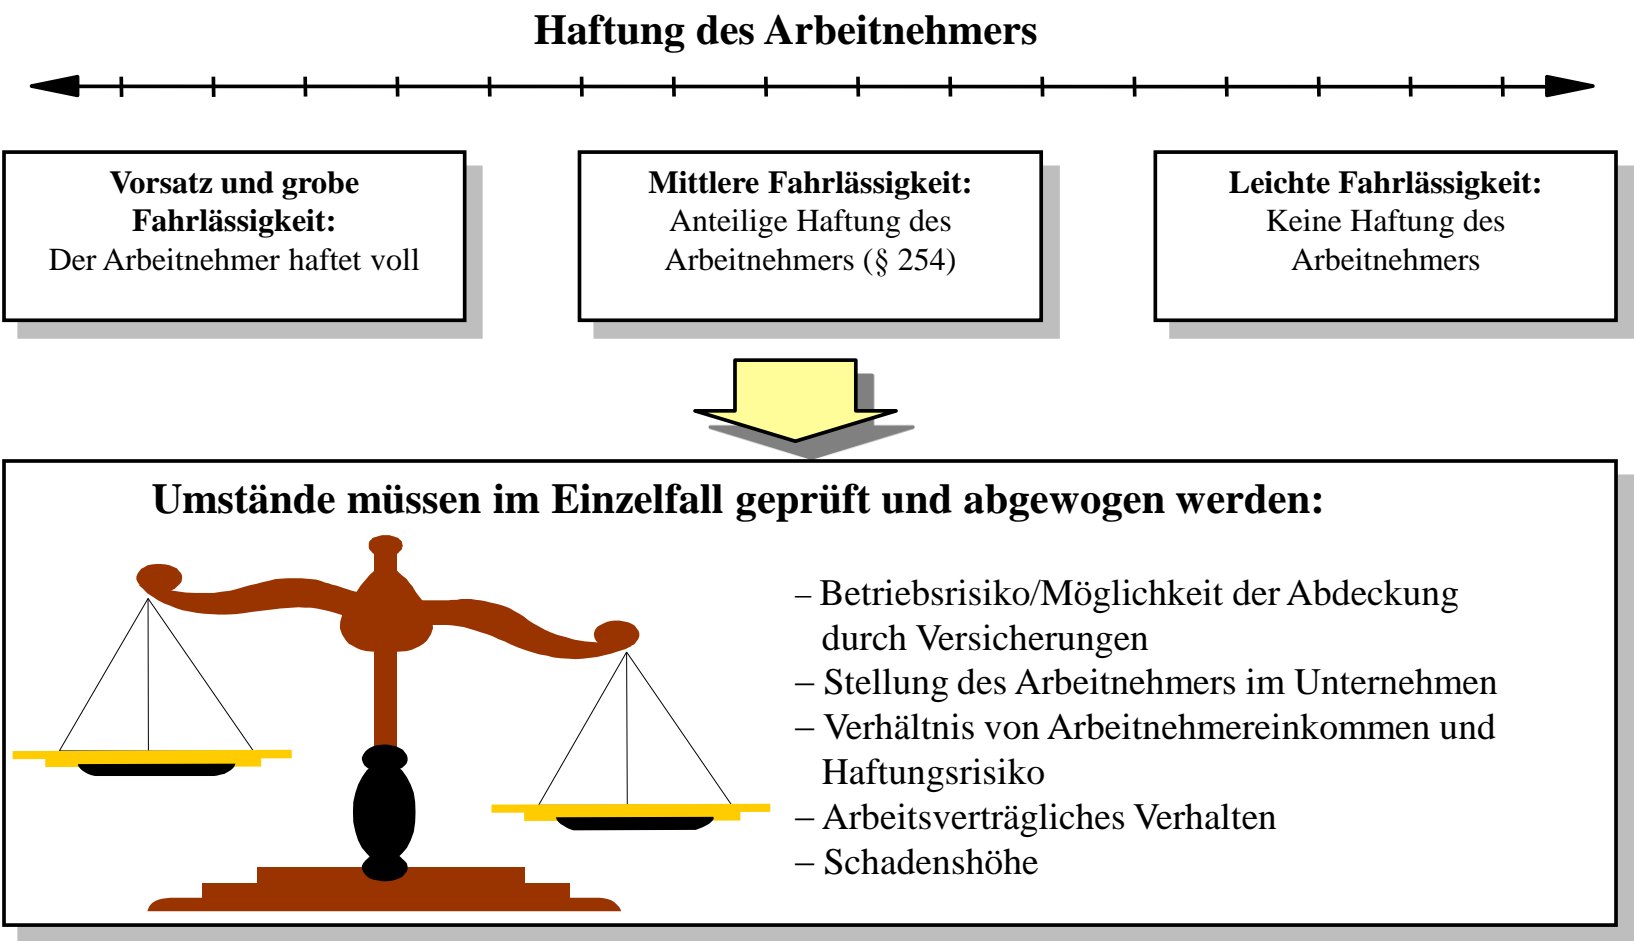

S. 68 Abb. 49



## Pflichten des Arbeitgebers

- Die **Hauptpflicht des Arbeitgebers** besteht in der **Entlohnung**. Die Höhe der Entlohnung ist Bestandteil von Tarif- oder Einzelarbeitsverträgen. Die Vergütung ist nachträglich zu zahlen, wobei der Arbeitgeber Sozialversicherungsbeiträge und Lohnsteuern einzubehalten und abzuführen hat.
- Ein **Lohnfortzahlungsanspruch** besteht nach § 616 BGB bzw. Entgeltfortzahlungsgesetz z.B. bei Urlaub, Feiertagen, Krankheit, Schwangerschaft, Betriebsstörungen und wenn der Arbeitnehmer ohne eigenes Verschulden an der Arbeitserbringung gehindert wird.
- Zur **Fürsorgepflicht** des Arbeitgebers, zu der er nach Treu und Glauben (§ 242 BGB) verpflichtet ist, gehören der Gleichbehandlungsgrundsatz, der Gleichberechtigungsgrundsatz und der Schutz der Persönlichkeit. Nach § 618 BGB sind die Arbeitsräume, die Arbeitsmittel und die Arbeitsabläufe so einzurichten, dass der Arbeitnehmer keinen Schaden erleidet.
- Der Arbeitgeber muss den Arbeitnehmern **Urlaub** von mindestens 24 Werktagen gewähren (§§ 1, 3 Abs. 1 BUrlG). Abgegolten werden kann er nur bei Beendigung des Arbeitsverhältnisses. Das Urlaubsentgelt ist vor Beginn des Urlaubs auszuzahlen. Zusätzlich ist in vielen Tarifverträgen die Zahlung eines Urlaubsgeldes vorgesehen.
- Der Arbeitgeber hat dem Arbeitnehmer nach § 630 BGB ein **Zeugnis** auszustellen. Auf Verlangen des Arbeitnehmers muss dieses neben der Beschreibung der Tätigkeit auch eine Beurteilung der Leistungen und des Verhaltens enthalten (qualifiziertes Zeugnis).

S. 69 f.

## Beendigung von Arbeitsverhältnissen

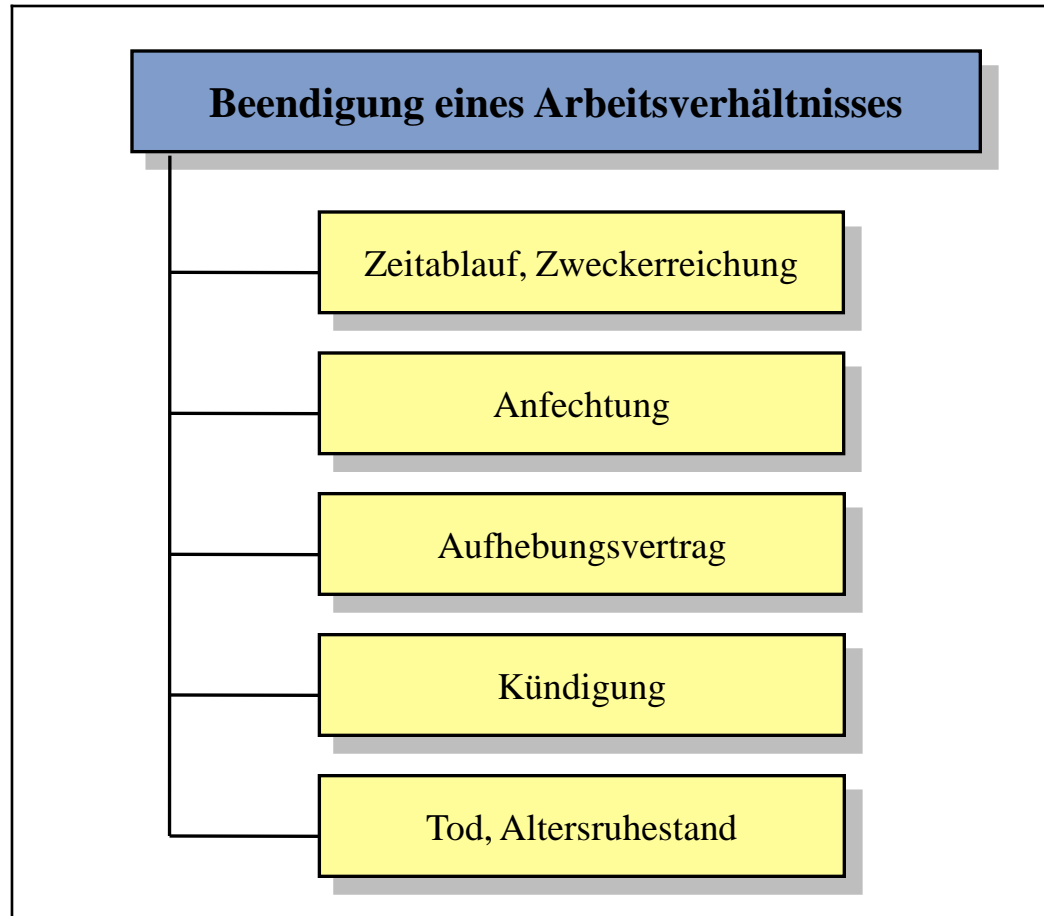

S. 70 Abb. 50

Jung, Hans: Personalwirtschaft, 9. Aufl., München 2010.

© Oldenbourg Wissenschaftsverlag



## Beendigung von Arbeitsverhältnissen

### Zeitablauf, Zweckerreichung

Befristete Arbeitsverhältnisse enden mit Ablauf der vereinbarten Frist, eine Kündigung ist nicht erforderlich.  
(§ 620 Abs. 1 BGB)

### Anfechtung

Jedes Arbeitsverhältnis kann durch Anfechtung enden (§§ 119, 123 BGB). Neben der arglistigen Täuschung (§ 123 BGB) kann eine Anfechtung auch wegen Drohung (§ 123 BGB) oder wegen Irrtums (§ 119 BGB) erfolgen. Der angefochtene Arbeitsvertrag gilt als nichtig ab dem Zeitpunkt der Anfechtungserklärung ("ex nunc"), so dass ein Entgeltanspruch für die geleistete Arbeit besteht.

### Aufhebungsvertrag

Beide Vertragsparteien können den Arbeitsvertrag zu jeder Zeit durch einen Aufhebungsvertrag - mit oder ohne Zahlung einer Abfindung – einvernehmlich beenden. Kündigungsfristen brauchen dabei nicht eingehalten zu werden; das Mitwirkungsrecht des Betriebsrats gilt ebenfalls nicht. Im Falle anschließender Arbeitslosigkeit hat der Arbeitnehmer unter Umständen mit einer 12 wöchigen Sperrzeit zu rechnen und die Abfindung wird auf das Arbeitslosengeld angerechnet.



### Kündigung

Eine Kündigung ist eine einseitige, empfangsbedürftige Willenserklärung, die mit Zugang beim Empfänger wirksam wird (§ 130 BGB). Die Kündigung ist gemäß § 623 BGB schriftlich zu fassen. Eine Änderungskündigung nach § 2 KSchG das Angebot des Arbeitgebers, das Arbeitsverhältnis mit einem inhaltlich neuen Arbeitsvertrag fortzusetzen.

Da ein Arbeitsvertrag nur als Ganzes gekündigt werden kann, ist ein Teilkündigung unzulässig. Auch bei der Stilllegung eines Unternehmens muss unter Einhaltung der gesetzlich vorgeschriebenen Kündigungsfrist gekündigt werden.

### Altersruhestand

Mit dem Erreichen des **Rentenalters** endet das Arbeitsverhältnis nicht automatisch, sondern nur dann, wenn der Bezug einer bestimmten Rente oder die Erreichung des 65. Lebensjahres durch einen Tarifvertrag, eine Betriebsvereinbarung oder durch Einzelvertrag als Beendigungsgrund vereinbart ist.

### Tod

Der Tod eines Arbeitnehmers beendet das Arbeitsverhältnis. Durch den Tod des Arbeitgebers wird das Arbeitsverhältnis i.d.R. nicht beendet.



## Gliederung des Arbeitsschutzrechtes

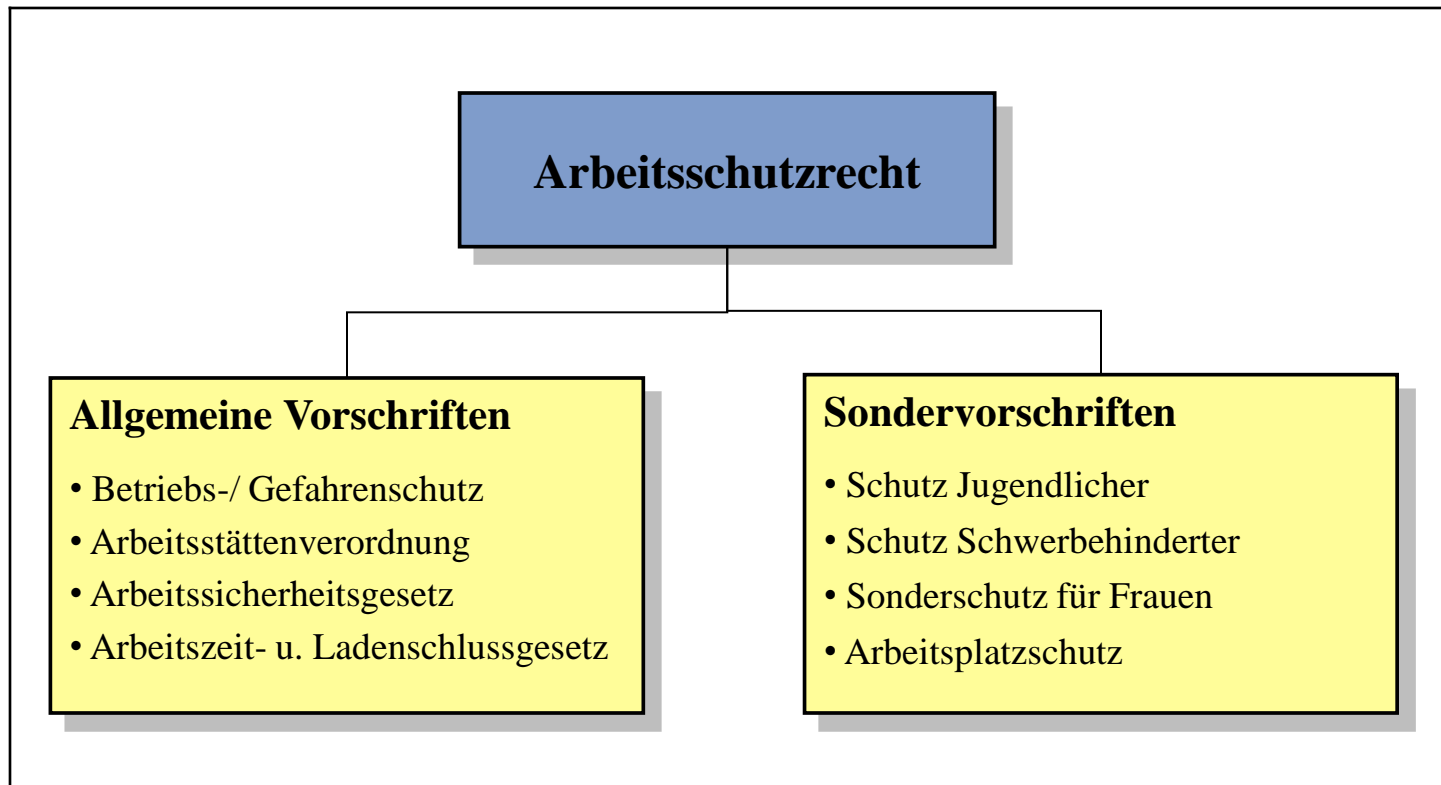

S. 71 ff.

# Gesetze und Verordnungen des Arbeitsschutzrechtes

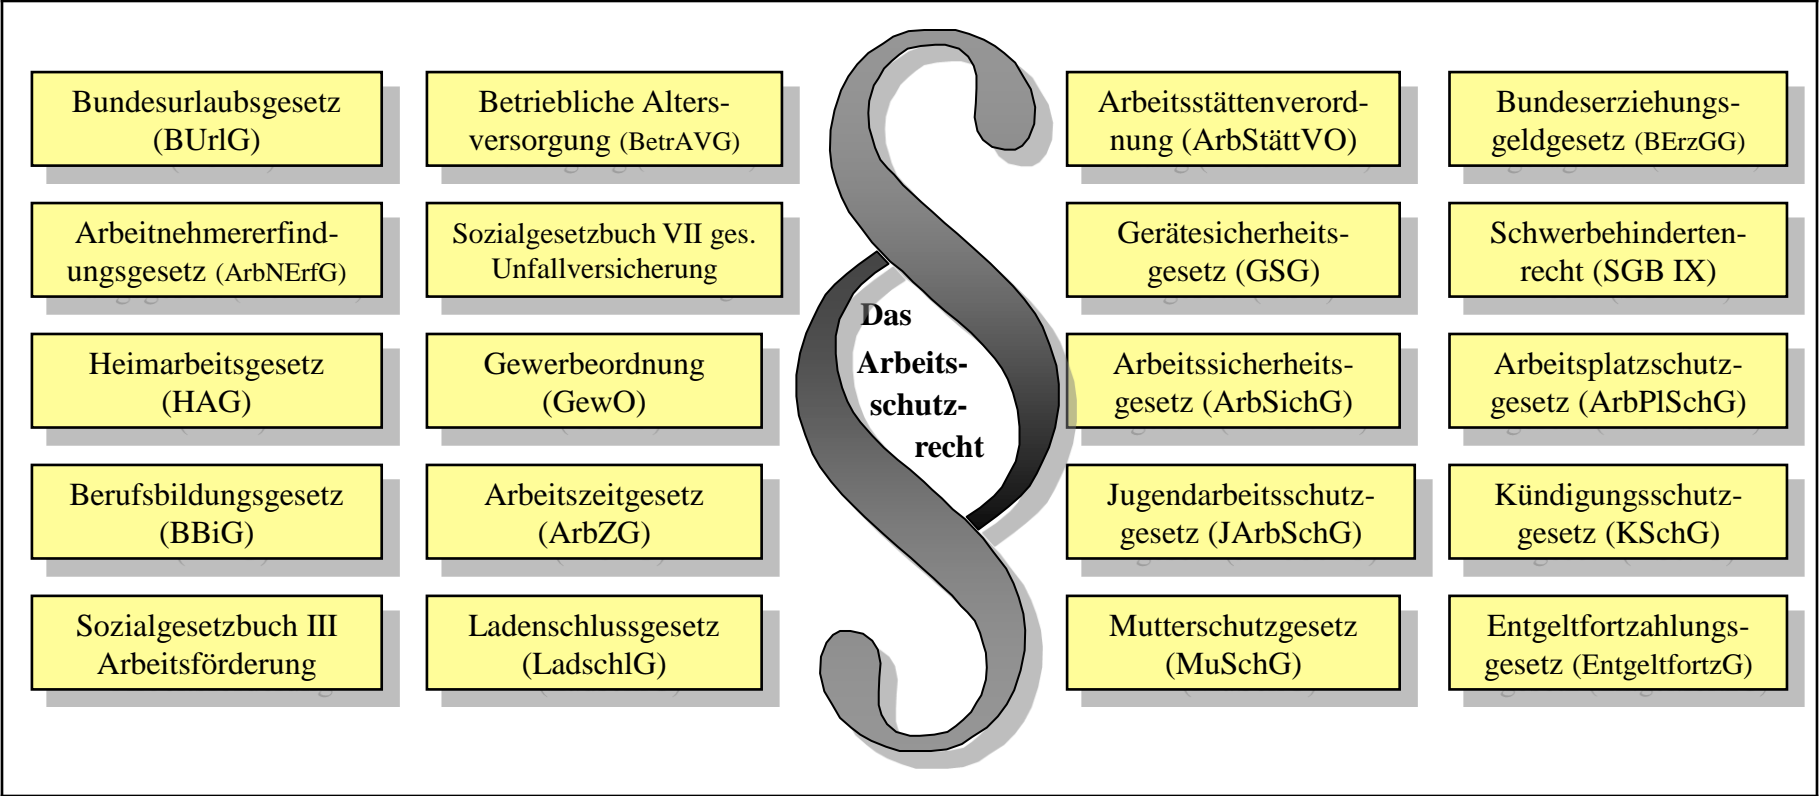

S. 72 Abb. 51





## Grundsätze

Das Arbeitnehmerschutzrecht umfasst die Arbeitssicherheit und den sozialen Arbeitsschutz. Für die genannten Gesetze und Verordnungen gelten folgende Grundsätze:

- Die sich aus dem Arbeitsschutzrecht ergebenden Arbeitgeberpflichten bestehen in erster Linie nicht gegenüber dem Arbeitnehmer, sondern gegenüber der Öffentlichkeit.
- Das Arbeitsschutzrecht ist mit wenigen Ausnahmen unabdingbar, d.h. der Arbeitnehmer kann nicht auf die Einhaltung verzichten.
- Erfüllt der Arbeitgeber die ihm obliegenden Arbeitsschutzvorschriften nicht, kann der Arbeitnehmer die Arbeit verweigern und Ersatz des ihm entstandenen Schadens verlangen.
- Die Verletzung von Arbeitsschutzvorschriften stellt eine Ordnungswidrigkeit oder vielfach sogar eine Straftat dar.

S. 72 ff.

Jung, Hans: Personalwirtschaft, 9. Aufl., München 2010.

© Oldenbourg Wissenschaftsverlag



## Das kollektive Arbeitsrecht

- Im **kollektiven Arbeitsrecht** sind die Rechtsfragen geregelt, bei denen nicht ein Arbeitnehmer als Einzelperson, sondern eine Gruppe von Arbeitnehmern betroffen ist. Es regelt insbesondere die Beziehungen zwischen den Gewerkschaften und den Arbeitgeberverbänden.
- Ein Schwerpunkt ist hier die rechtliche Grundlage von **Tarifverträgen** und Fragen der Durchführung von **Arbeitskampfmaßnahmen**.
- Gesetze bezüglich der innerbetrieblichen **Mitbestimmung** und Mitwirkung (Betriebsrat) und der Mitbestimmung auf Unternehmensebene (Arbeitnehmersvertretung in Aufsichtsräten) als Bestandteile des kollektiven Arbeitsrechts von großer Bedeutung.

S. 76 ff.

Jung, Hans: Personalwirtschaft, 9. Aufl., München 2010.

© Oldenbourg Wissenschaftsverlag



Die Arbeitgeberverbände

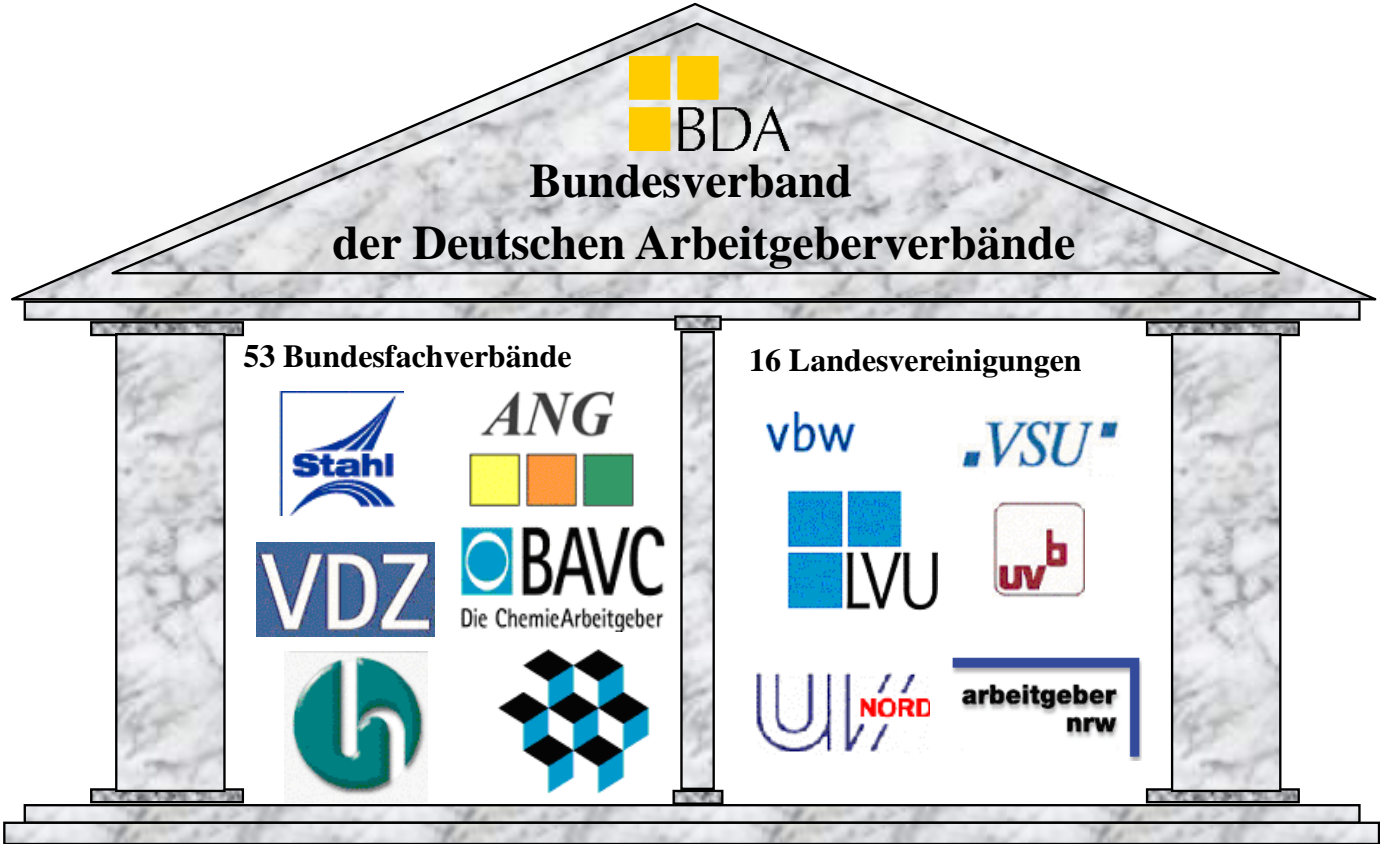

S. 76f.

## Die Gewerkschaften

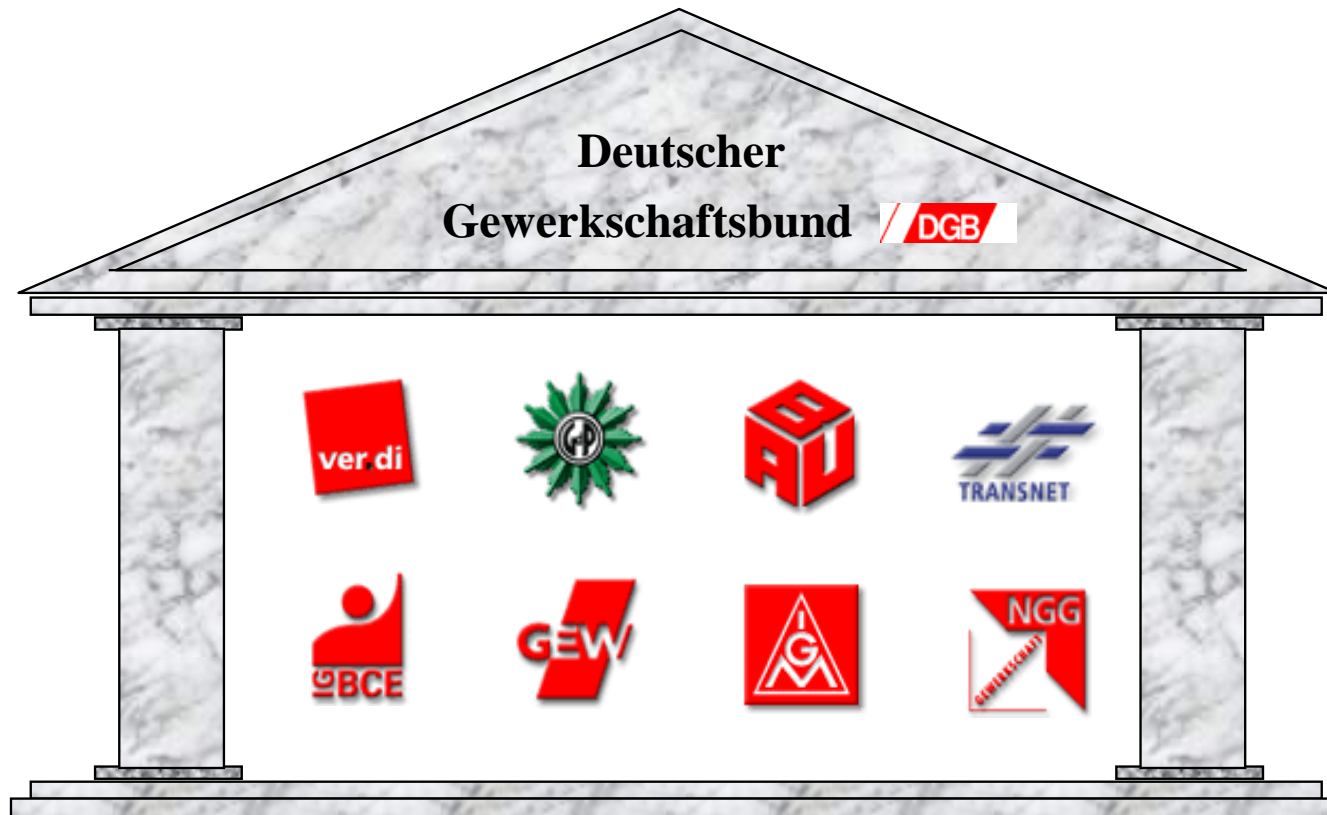

S. 76f.

Jung, Hans: Personalwirtschaft, 9. Aufl., München 2010.

© Oldenbourg Wissenschaftsverlag



## Die Industriegesellschaften im Deutschen Gewerkschaftsbund (DGB)

- Industriegesellschaft Bauer-Agrar-Umwelt
- Industriegesellschaft Bergbau, Chemie, Energie
- Gewerkschaft Erziehung und Wissenschaft
- Gewerkschaft der Polizei
- Gewerkschaft Nahrung-Genuss-Gaststätten
- Industriegesellschaft Metall
- TRANSNET Gewerkschaft GdED
- Vereinte Dienstleistungsgesellschaft

S. 76 Abb. 52

Jung, Hans: Personalwirtschaft, 9. Aufl., München 2010.

© Oldenbourg Wissenschaftsverlag



## Inhalt von Tarifverträgen

In § 1 TVG wird der Inhalt von Tarifverträgen festgelegt. Man unterscheidet hier zwei Ebenen:

- den **schuldrechtlichen** Teil (sog. obligatorische Bestimmungen), der das Verhältnis der Tarifparteien untereinander regelt, und
- den **normativen** Teil, der wie gesetzliche Bestimmungen die Bedingungen der einzelnen Arbeitsverhältnisse festlegt.

## Die Hauptbestandteile des schuldrechtlichen Teils von Tarifverträgen sind:

- Die **Friedenspflicht** verbietet Arbeitsk Kampfmaßnahmen (Streik) während der Laufzeit eines Tarifvertrags; nach Ablauf sind sie erst zulässig, wenn Verhandlungen gescheitert sind.
- Die **Einwirkungspflicht** verpflichtet die Tarifvertragsparteien, so auf ihre Mitglieder einzuwirken, dass diese die Vereinbarungen einhalten.
- Die **Nachwirkungspflicht**, die bestimmt, dass ein Tarifvertrag nach seinem Ablauf weiter gültig ist, bis eine neue Regelung erfolgt (§ 4 Abs. 5 TVG).



Wichtiger für den einzelnen Arbeitgeber bzw. Arbeitnehmer sind die **normativen Bestimmungen**.

Man unterscheidet folgende **Normen**:

- **Inhaltsnormen** (§ 4 Abs. 1 TVG) regeln den Inhalt des Arbeitsvertrags (Lohn, Arbeitszeit, Kündigung, Urlaub).
- **Abschlussnormen** (§ 4 Abs. 1 TVG) befassen sich mit den Formvorschriften beim Abschluss von Arbeitsverträgen (Vertragsform, Abschlussverbote).
- **Betriebsnormen** (§ 3 Abs. 2 TVG) sind Normen über Betriebseinrichtungen oder über den Arbeitsschutz. Hier werden u.a. auch Sozialeinrichtungen (Pausenräume, Waschgelegenheiten, Umkleideräume) angesprochen. Diese Normen sind auch für Arbeitnehmer wirksam, die nicht einer Gewerkschaft angehören.
- **Betriebsverfassungsrechtliche Normen** (§ 3 Abs. 2 TVG) konkretisieren oder erweitern die Mitbestimmungsrechte des Betriebsrats.
- **Normen über gemeinsame Einrichtungen** (§ 4 Abs. 2 TVG) können z.B. Lohnausgleichskassen, überbetriebliche Ausbildungsstätten oder betriebliche Altersversorgungsleistungen betreffen.



# Arten von Tarifverträgen

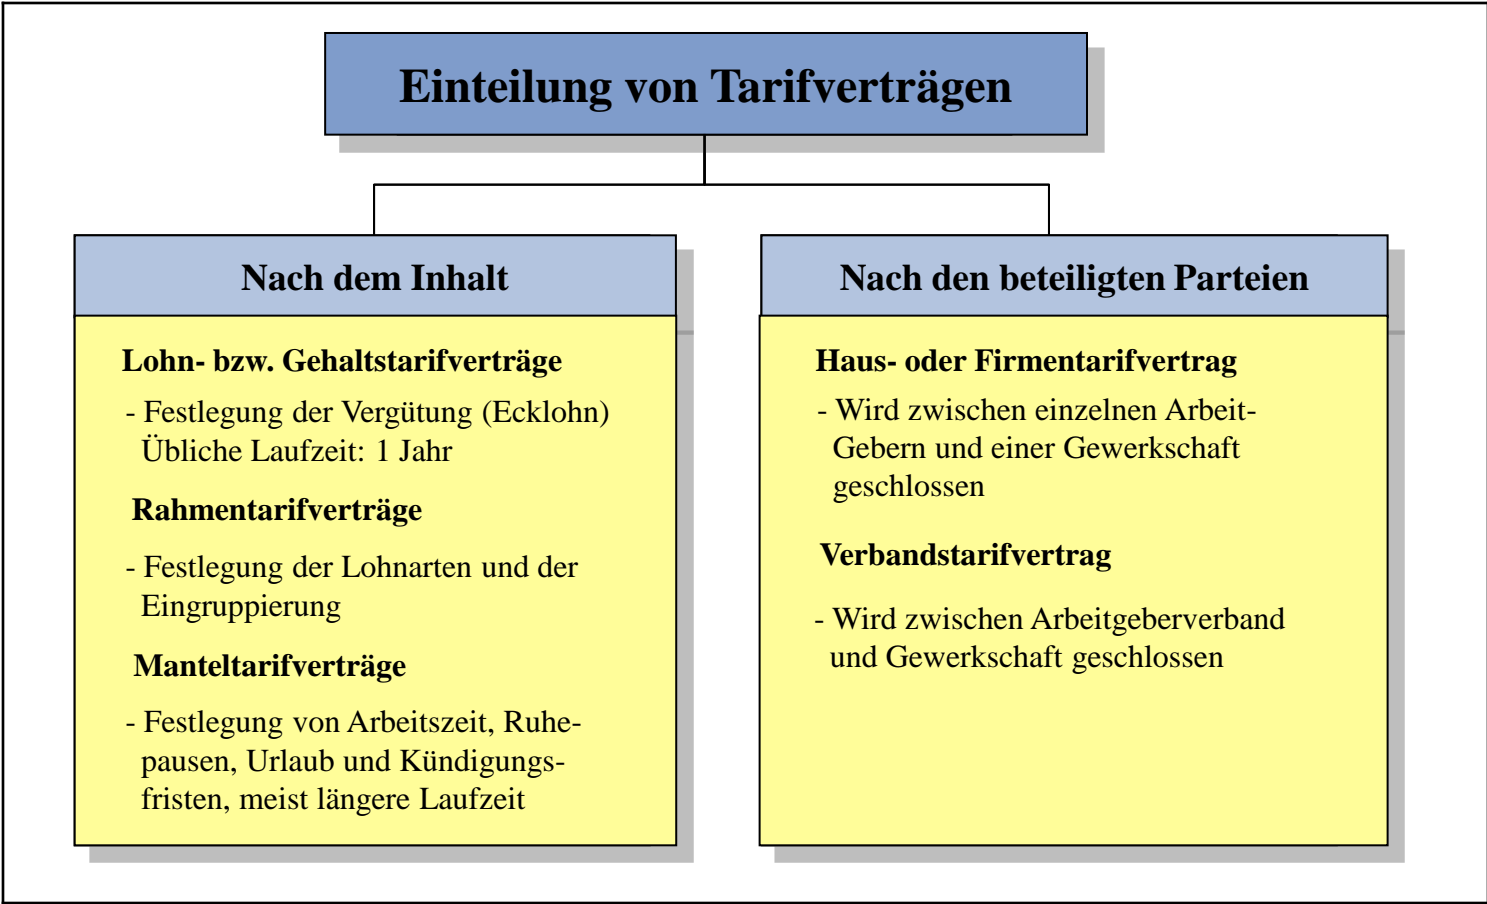

S. 78 Abb. 53





## Rechtswirkung des Tarifvertrages

Die durch den Tarifvertrag festgelegten allg. Rechtsnormen gelten **unmittelbar** und **zwingend** für die Mitglieder der Tarifvertragsparteien (Tarifgebundene). Die Regelungen des Tarifvertrags betreffen das einzelne Arbeitsverhältnis direkt (§ 4 TVG), ohne dass der Einzelarbeitsvertrag ausdrücklich auf ihn Bezug nimmt.

Positive Regelungen ergänzen den Arbeitsvertrag, negative machen entgegenstehende Abmachungen unwirksam.

## Geltungsbereich des Tarifvertrages

Im Tarifvertrag wird der zeitliche und räumliche Geltungsbereich angegeben. Grundsätzlich gilt ein Tarifvertrag für einen bestimmten Wirtschaftszweig, der sich nach dem überwiegenden Betriebszweck richtet. Gemäß der Tarifeinheit (Industrieverbandsprinzip) gilt er für alle Arbeitnehmer eines Betriebes.

Unter bestimmten Voraussetzung kann eine **Allgemeinverbindlichkeitserklärung** erwirkt werden, durch welche auch die bisher nicht tarifgebundenen Arbeitnehmer und Arbeitgeber vom jeweiligen Tarifvertrag in dessen Geltungsbereich erfasst werden.



## Der Arbeitskampf

### Streik

Der Streik ist die **gemeinsame und planmäßige Weigerung** einer größeren Zahl von Arbeitnehmern, ihre Arbeit zu verrichten. Zulässig sind lediglich Streiks, die von einer Gewerkschaft geführt und organisiert werden und die Friedenspflicht während der Laufzeit eines Tarifvertrages nicht verletzen.

Weiterhin muss vor dem Streik eine **Urabstimmung** unter den Gewerkschaftsmitgliedern durchgeführt werden und dabei eine Stimmenmehrheit von mind. 75 % für dessen Ausrufung erzielt worden sein.

### Aussperrung

Eine größere Anzahl von Arbeitnehmern wird durch einen oder mehrere Arbeitgeber von ihrer Arbeit ausgeschlossen. Zulässig ist dabei lediglich die sog. **Abwehraussperrung** zur Abwehr eines Streiks, die **Angriffsaussperrung**, durch die der Arbeitgeber den Arbeitskampf eröffnet, ist rechtswidrig.

### Boykott

Der Boykott ist ein in der Praxis relativ selten verwendetes Mittel des Arbeitskampfes. Arbeitgeber oder Arbeitnehmer versuchen, die jeweils andere Partei unter Druck zu setzen, indem sie Dritte dazu aufrufen, keine Vertragsabschlüsse mehr mit der gegnerischen Partei abzuschließen.



Phasen des Arbeitskampfes

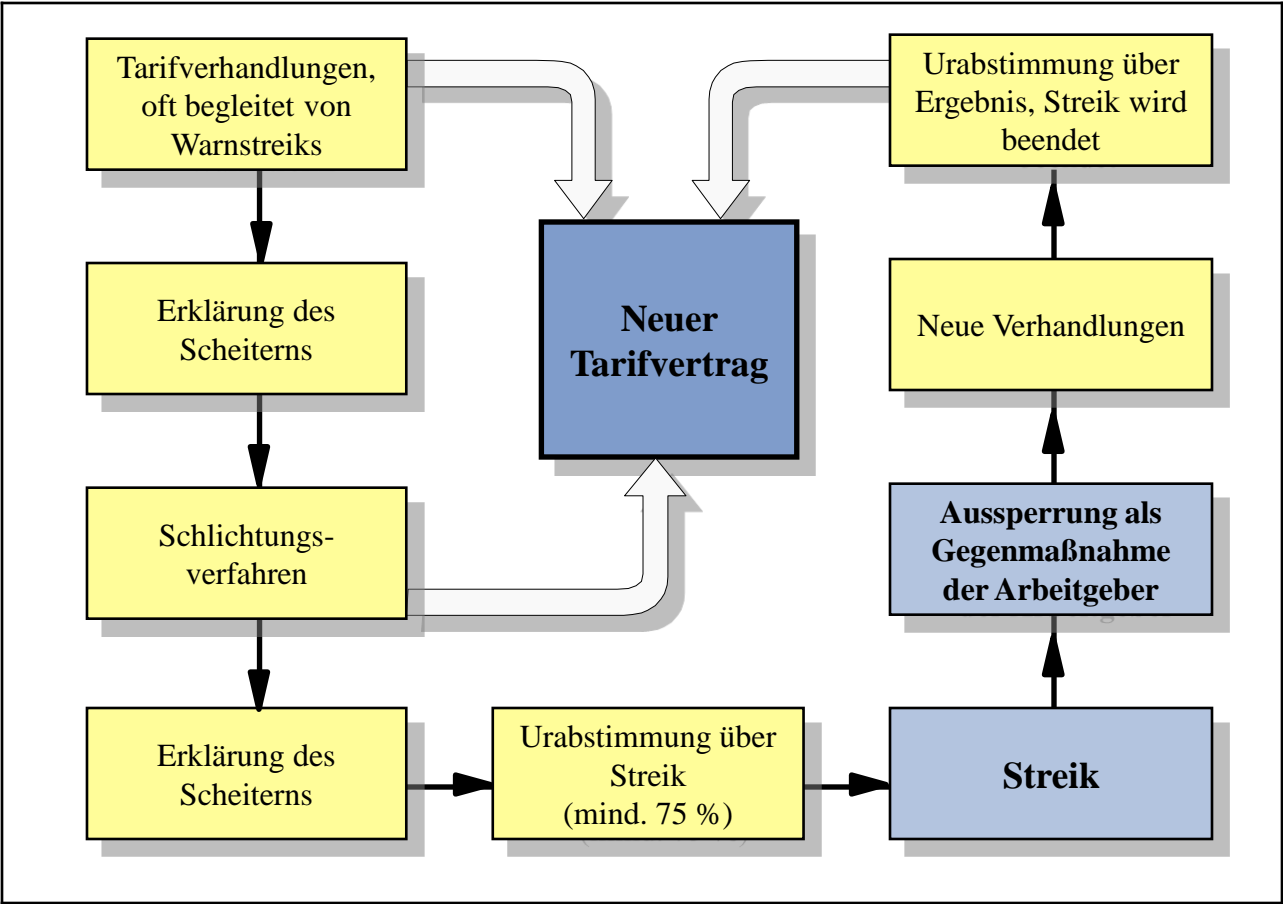

S. 81 Abb. 54  
(in Anlehnung an: IG Metall: Daten, Fakten, Informationen, Frankfurt 2007, S. 16 f.)



## Geschichtliche Entwicklung der Mitbestimmung

|                   |                                                                                                                                                                                              |
|-------------------|----------------------------------------------------------------------------------------------------------------------------------------------------------------------------------------------|
| <b>1891</b>       | Gewerbeordnungsnovelle                                                                                                                                                                       |
| <b>1891/92</b>    | Einführung von Arbeitsausschüssen                                                                                                                                                            |
| <b>05.12.1916</b> | Hilfsdienstgesetz (Mitgestaltungsrecht am Arbeitsplatz)                                                                                                                                      |
| <b>15.11.1918</b> | Arbeitsgemeinschaft der industriellen und gewerblichen Arbeitgeber und -nehmer Deutschlands beschließt die Einrichtung von Arbeiter- und Angestelltenausschüssen für die gesamte Wirtschaft  |
| <b>23.12.1918</b> | Tarifvertragsordnung des Rates der Volksbeauftragten schreibt Arbeitnehmerausschüsse für alle Betriebe mit mindestens 20 Angestellten gesetzlich vor                                         |
| <b>05.03.1919</b> | Erklärung der Reichsregierung, Arbeiterräte als wirtschaftliche Interessenvertretung anzuerkennen                                                                                            |
| <b>04.02.1920</b> | Betriebsrätegesetz                                                                                                                                                                           |
| <b>15.02.1922</b> | Reichsgesetz über die Entsendung von Betriebsratsmitgliedern in die Aufsichtsräte                                                                                                            |
| <b>10.04.1946</b> | Kontrollgesetz gestattet die Wiedereinführung demokratisch gewählter Betriebsräte                                                                                                            |
| <b>10.11.1948</b> | Kontrollgesetz zur Umgestaltung des deutschen Kohlebergbaus und der deutschen Eisen- und Stahlindustrie                                                                                      |
| <b>27.01.1951</b> | Richtlinie zur Mitbestimmung im Bergbau und der eisenschaffenden Industrie                                                                                                                   |
| <b>21.05.1951</b> | Gesetz über die Mitbestimmung der Arbeitnehmer in den Aufsichtsräten und Vorständen der Unternehmen des Bergbaus und der eisen- und stahlerzeugenden Industrie (Montan-Mitbestimmungsgesetz) |

S. 81 Abb. 55/Teil A

Jung, Hans: Personalwirtschaft, 9. Aufl., München 2010.

© Oldenbourg Wissenschaftsverlag

**(Fortsetzung)**

|                   |                                                                                                                          |
|-------------------|--------------------------------------------------------------------------------------------------------------------------|
| <b>14.11.1952</b> | Betriebsverfassungsgesetz von 1952                                                                                       |
| <b>06.09.1955</b> | Personalvertretungsgesetz                                                                                                |
| <b>07.08.1956</b> | Mitbestimmungsergänzungsgesetz                                                                                           |
| <b>27.04.1967</b> | Erste Novelle zum Mitbestimmungsgesetz                                                                                   |
| <b>29.11.1971</b> | Zweite Novelle zum Mitbestimmungsgesetz                                                                                  |
| <b>19.01.1972</b> | Betriebsverfassungsgesetz von 1972                                                                                       |
| <b>20.02.1974</b> | Bundeskabinett verabschiedet 1. Entwurf eines Gesetzes zur Einführung der paritätischen Mitbestimmung in Großunternehmen |
| <b>05.04.1974</b> | Bundesrat verwirft den Mitbestimmungs-Gesetzesentwurf                                                                    |
| <b>16.02.1976</b> | DGB-Vorsitzender droht mit Streiks zur Verteidigung der Montan-Mitbestimmung                                             |
| <b>18.03.1976</b> | Bundestag beschließt ein neues Mitbestimmungsgesetz                                                                      |
| <b>01.07.1976</b> | Das neue Mitbestimmungsgesetz tritt in Kraft                                                                             |
| <b>01.03.1979</b> | Mitbestimmungsurteil des Bundesverfassungsgerichts                                                                       |
| <b>01.07.1981</b> | Montan-Mitbestimmungsänderungsgesetz                                                                                     |
| <b>20.12.1988</b> | Gesetz über Sprecherausschüsse der leitenden Angestellten                                                                |
| <b>28.10.1996</b> | Gesetz über die Europäischen Betriebsräte                                                                                |
| <b>01.07.2004</b> | Drittelbeteiligungsgesetz                                                                                                |

S. 81 Abb. 55/Teil B

**Jung, Hans: Personalwirtschaft, 9. Aufl., München 2010.**

© Oldenbourg Wissenschaftsverlag

## Ebenen und Gesetze der Mitbestimmung

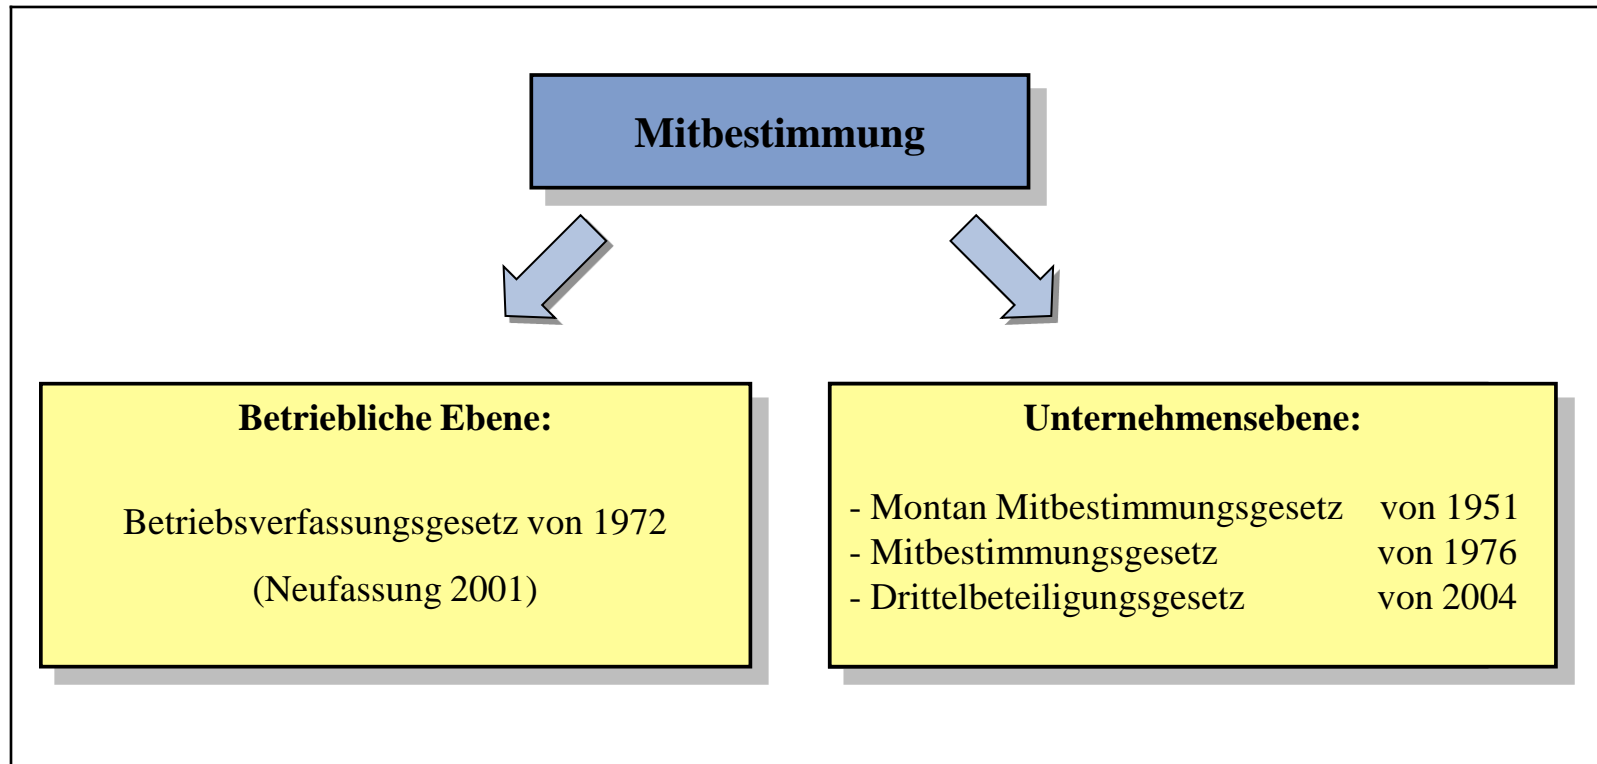



## Mitbestimmung auf Betriebsebene

Die **Betriebsverfassung** ist der Rahmen der Zusammenarbeit zwischen Arbeitgeber und Arbeitnehmerschaft. Das Betriebsverfassungsgesetz (**BetrVG**) von 1972 regelt die rechtliche Stellung der Arbeitnehmer und deren Beteiligung an den betrieblichen Entscheidungen.

Das **BetrVG** gilt für Betriebe der privaten Wirtschaft. Für Betriebe und Verwaltungen des öffentlichen Rechts gilt das Personalvertretungsgesetz mit weitgehend analogen Bestimmungen. Leitende Angestellte unterliegen nach § 5 Abs. 3 nicht dem BetrVG, soweit in ihm nicht ausdrücklich etwas anderes bestimmt ist, sondern dem Gesetz über Sprecherausschüsse der leitenden Angestellten (SprAuG).

Die **Mitwirkungsrechte** des einzelnen Arbeitnehmers bestehen im Recht auf Information über seine Arbeit und deren Gefahren, auf Erörterung seiner Lohnabrechnung, seiner Leistungsbeurteilung und seiner Entwicklungsmöglichkeiten, auf Einblick in seine Personalakte und auf Beschwerde (§§ 81 ff. BetrVG).

Von besonderer Bedeutung im Zusammenhang mit der Mitbestimmung auf Betriebsebene ist der **Betriebsrat** als Organ der Arbeitnehmer eines Betriebes.



## Der Betriebsrat

Während die Gewerkschaften die Arbeitnehmer überbetrieblich vertreten, ist der Betriebsrat die Vertretung der Arbeitnehmer im Betrieb. Er kann nach § 1 BetrVG kann auf Initiative der Arbeitnehmer in allen Betrieben mit mindestens fünf ständigen, wahlberechtigten Arbeitnehmern, von denen drei wählbar sein müssen, gewählt werden.

Aktives Wahlrecht besitzt nach § 7 BetrVG, wer am Wahltag dem Betrieb angehört, das 18. Lebensjahr vollendet hat und mindestens zehn Stunden pro Woche beschäftigt ist. Weiterhin sind wahlberechtigt Leiharbeiter, die länger als drei Monate im Betrieb beschäftigt werden

Wählbar ist, wer daneben mindestens seit sechs Monaten dem Betrieb angehört.

Die Wahlen sind nach demokratischem Verhältniswahlrecht alle vier Jahre in der Zeit vom 1. März bis zum 31. Mai durchzuführen. Einzelheiten der Wahl sind in der Wahlordnung vom 25.10.01 festgelegt und in den §§ 13 ff. BetrVG geregelt.





Der Betriebsrat - Zusammensetzung

| Anzahl der<br>wahlberechtigten<br>Arbeitnehmer |     |       | Betriebsrats-<br>mitglieder | Anzahl der<br>wahlberechtigten<br>Arbeitnehmer |     |       | Betriebsrats-<br>mitglieder |
|------------------------------------------------|-----|-------|-----------------------------|------------------------------------------------|-----|-------|-----------------------------|
| 5                                              | bis | 20    | 1 (Obmann)                  | 3.501                                          | bis | 4.000 | 25                          |
| 21                                             | bis | 50    | 3                           | 4.001                                          | bis | 4.500 | 27                          |
| 51                                             | bis | 100   | 5                           | 4.501                                          | bis | 5.000 | 29                          |
| 101                                            | bis | 200   | 7                           | 5.001                                          | bis | 6.000 | 31                          |
| 201                                            | bis | 400   | 9                           | 6.001                                          | bis | 7.000 | 33                          |
| 401                                            | bis | 700   | 11                          | 7.001                                          | bis | 9.000 | 35                          |
| 701                                            | bis | 1.000 | 13                          |                                                |     |       |                             |
| 1.001                                          | bis | 1.500 | 15                          |                                                |     |       |                             |
| 1.501                                          | bis | 2.000 | 17                          |                                                |     |       |                             |
| 2.001                                          | bis | 2.500 | 19                          |                                                |     |       |                             |
| 2.501                                          | bis | 3.000 | 21                          |                                                |     |       |                             |
| 3.001                                          | bis | 3.500 | 23                          |                                                |     |       |                             |

Die Zahl der Betriebsratsmitglieder erhöht sich in Betrieben mit mehr als 9.000 Arbeitnehmern um 2 Mitglieder je angefangene 3.000 weitere Arbeitnehmer.

S. 87 Abb. 57

## Der Betriebsrat – weitere rechtliche Rahmenbedingungen

| Betriebsgröße<br>(Arbeitnehmerzahl)                                                                                                                                                 | Freizustellende<br>Betriebsratsmitglieder |
|-------------------------------------------------------------------------------------------------------------------------------------------------------------------------------------|-------------------------------------------|
| 200 bis 500                                                                                                                                                                         | 1                                         |
| 501 bis 900                                                                                                                                                                         | 2                                         |
| 901 bis 1.500                                                                                                                                                                       | 3                                         |
| 1.501 bis 2.000                                                                                                                                                                     | 4                                         |
| 2.001 bis 3.000                                                                                                                                                                     | 5                                         |
| 3.001 bis 4.000                                                                                                                                                                     | 6                                         |
| 4.001 bis 5.000                                                                                                                                                                     | 7                                         |
| 5.001 bis 6.000                                                                                                                                                                     | 8                                         |
| 6.001 bis 7.000                                                                                                                                                                     | 9                                         |
| 7.001 bis 8.000                                                                                                                                                                     | 10                                        |
| 8.001 bis 9.000                                                                                                                                                                     | 11                                        |
| 9.001 bis 10.000                                                                                                                                                                    | 12                                        |
| Die Zahl der freizustellenden Betriebsratsmitglieder erhöht sich in Betrieben mit mehr als 10.000 Arbeitnehmern um 1 Betriebsratsmitglied je angefangene 2.000 weitere Arbeitnehmer |                                           |

Die Arbeit im Betriebsrat ist ein **unentgeltliches Ehrenamt**, für das die Betriebsratsmitglieder in dem zur Ausübung ihrer Aufgaben erforderlichen zeitlichen Umfang bei Fortzahlung des Arbeitsentgeltes von der Arbeit **freizustellen** sind (§ 37 BetrVG).

Der Arbeitgeber hat die durch die Tätigkeit des Betriebsrates anfallenden **Kosten** zu tragen (§ 40 BetrVG).

Betriebsratsmitglieder besitzen einen besonderen **Kündigungsschutz** (§ 103 BetrVG) und eine erweiterte **Schweigepflicht** in Bezug auf betriebliche und persönliche Geheimnisse (§ 79 BetrVG).

S. 88 Abb. 58



## Grundsätze der Zusammenarbeit

Für die Zusammenarbeit zwischen Betriebsrat und Arbeitgeber gelten folgende Grundsätze (vgl. §§ 2, 74 und 78 BetrVG):

- Arbeitgeber und Betriebsrat haben vertrauensvoll zusammenzuarbeiten und sich einmal im Monat mit dem ernstesten Willen zur Einigung zu treffen.
- Die Friedenspflicht verbietet jede Betätigung, die den Arbeitsablauf und den Betriebsfrieden gefährdet oder parteipolitisch ist.
- Mitglieder des Betriebsrats dürfen weder in ihrer Amtsausübung behindert noch bevorteilt oder benachteiligt werden.
- Zur Unterstützung des Betriebsrats haben die Gewerkschaften einen Zugangsanspruch zum Betrieb.



## Aufgaben des Betriebsrats

Aus § 80 BetrVG ergeben sich dazu konkret die folgenden Aufgabenstellungen:

- Die Überwachung der Einhaltung und Durchführung der zugunsten der Arbeitnehmer erlassenen Gesetze, Unfallverhütungsvorschriften, Tarifverträge und Betriebsvereinbarungen.
- Beantragung von Maßnahmen, die der Belegschaft und dem Betrieb dienen.
- Entgegennahme von Anregungen der Arbeitnehmer sowie der Jugend- und Auszubildendenvertretung und entsprechende Verhandlungen mit dem Arbeitgeber.
- Förderung der Belange und der Eingliederung von Schwerbehinderten, Ausländern, Jugendlichen und Älteren.



## Rechte des Betriebsrats

Zur Erfüllung seiner Aufgaben hat der Betriebsrat eine ganze Reihe von Mitwirkungs- und Mitbestimmungsrechten, die sich insbesondere auf die folgenden Bereiche beziehen:

- Soziale Angelegenheiten (§§ 87 - 89 BetrVG),
- Die Gestaltung von Arbeitsplatz, -ablauf und -umgebung (§§ 90 f. BetrVG),
- Personelle Angelegenheiten (§§ 92 - 105 BetrVG) und
- Wirtschaftliche Angelegenheiten (§§ 106 - 113 BetrVG)

S. 90 ff.



## Mitwirkungsrechte

- **Informationsrecht:** Es gewährleistet die rechtzeitige Information des Betriebsrats über Pläne des Arbeitgebers und besteht in nahezu allen betrieblichen Vorgängen, die für den Betriebsrat bzw. die Arbeitnehmer wichtig sein können.
- **Vorschlagsrecht:** Der Betriebsrat hat in einigen Fällen (z.B. bei der Personalplanung und bei der Aus- und Weiterbildung) das Recht, Vorschläge zu machen, die vom Arbeitgeber zur Kenntnis genommen und geprüft werden müssen.
- **Anhörungsrecht:** Das Anhörungsrecht ermöglicht es dem Betriebsrat, zu Entscheidungen des Arbeitgebers Stellung zu nehmen und so evtl. eine Einwirkung zu erreichen. Entscheidungen des Arbeitnehmers können blockiert werden oder unwirksam sein, wenn der Betriebsrat nicht zuvor angehört wurde.
- **Beratungsrecht:** Zu einigen Fragestellungen (z.B. Arbeitsplatzgestaltung, Einführung neuer Techniken) hat der Betriebsrat ein Beratungsrecht. Der Arbeitgeber muss aus eigener Initiative die Meinung des BR einholen und mit diesem über die betreffende Sache beraten.



## Mitbestimmungsrechte

- **Widerspruchsrecht:** Bestimmte Entscheidungen (z.B. Einstellungen, Umgruppierungen, Versetzungen) können durch den Betriebsrat blockiert werden. Im Falle der Verweigerung der Zustimmung durch den Betriebsrat ist der Arbeitgeber gezwungen, seine Entscheidung vor dem Arbeitsgericht durchzusetzen.
- **Vetorecht:** Der Betriebsrat hat insbesondere im sozialen Bereich ein volles Mitbestimmungsrecht, indem er Arbeitgeberentscheidungen widersprechen kann. Im Gegensatz zum einfachen Widerspruchsrecht kann die Verweigerung des Betriebsrates beim Vetorecht nicht durch das Arbeitsgericht ersetzt werden.
- **Initiativrecht:** Die Initiativrechte garantieren dem Betriebsrat die weitgehendsten Mitwirkungsrechte, da er hier Entscheidungen selbständig treffen und auch durchsetzen kann. Initiativrechte bestehen z.B. hinsichtlich der Aufstellung eines Sozialplans.

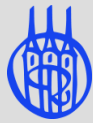

# Das Recht des Betriebsrats

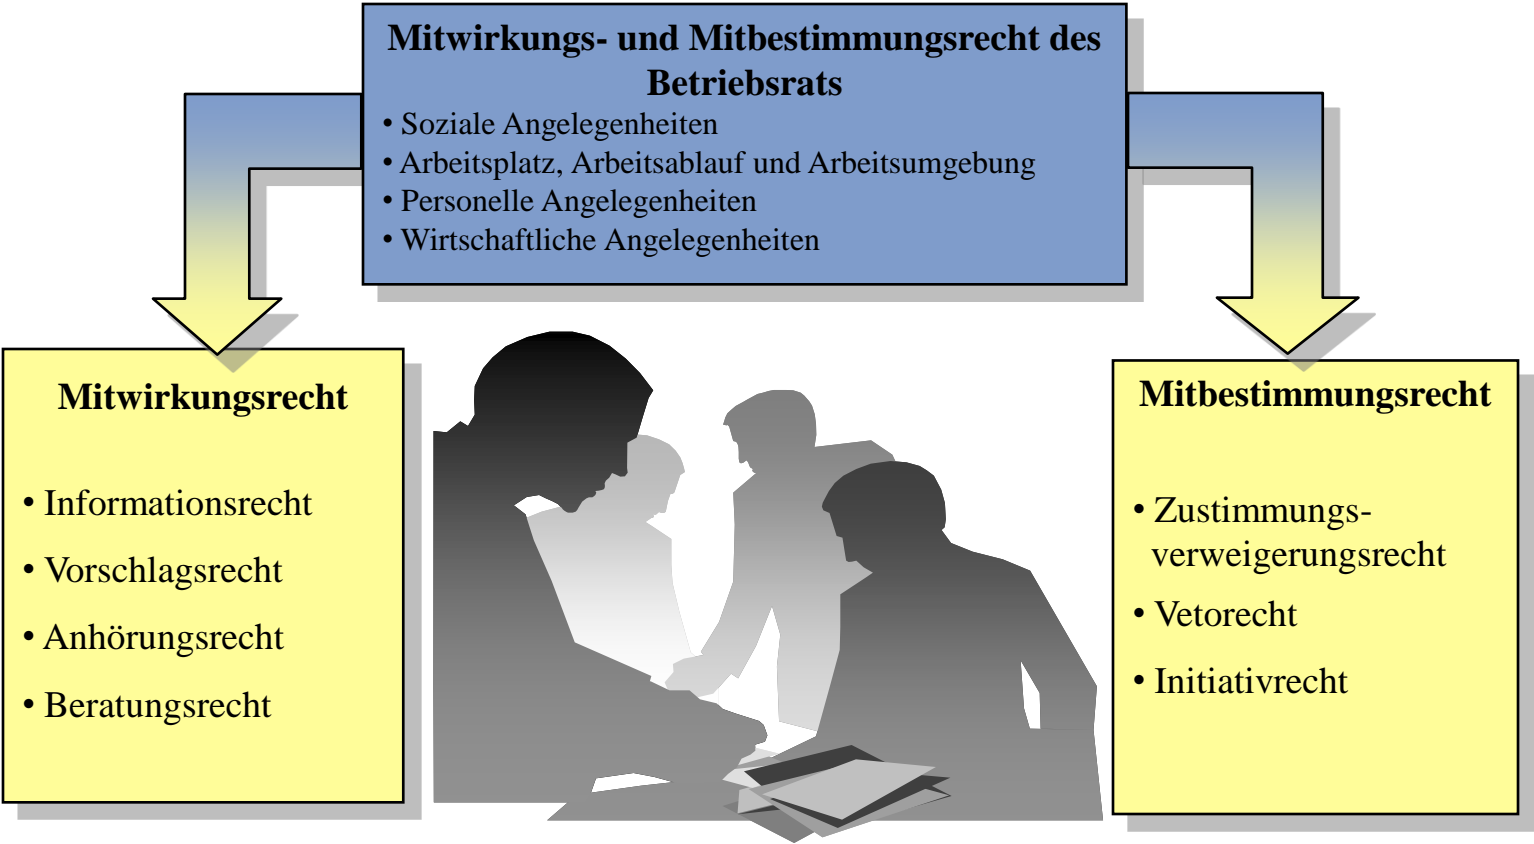

S. 91 Abb. 59





## **(1) Soziale Angelegenheiten**

Für die Wirksamkeit sozialer Maßnahmen ist die Zustimmung des Betriebsrats Bedingung.  
Nach § 87 gehören dazu folgende Bereiche:

- Fragen der Ordnung des Betriebs und des Verhaltens der Arbeitnehmer (z.B. Rauchverbote, Kleidungs-  
vorschriften, Torkontrollen, Stechuhren, Parkplatzordnung).
- Beginn und Ende der täglichen Arbeitszeit und der Pausen (insbesondere die Ein- und Durchführung  
gleitender Arbeitszeit, Schichtarbeit) sowie vorübergehende Verlängerung oder Verkürzung der betriebs-  
üblichen Arbeitszeit (Einführung von Überstunden, Kurzarbeit).
- Zeit, Ort und Art der Auszahlung der Arbeitsentgelte (Tages-, Wochen- oder Monatslohn, Einführung  
bargeldloser Zahlung).
- Aufstellung des Urlaubsplans (Einführung von Betriebsferien, Richtlinien über die Gewährung von  
Urlaub).



**(Forts.)**

- Einführung und Anwendung von technischen Einrichtungen zur Überwachung des Verhaltens und der Leistung der Arbeitnehmer (Aufstellen von Film- oder Videokameras zur Arbeitsüberwachung, Zeiterfassungsgeräte an Anlagen).
- Regelungen über die Verhütung von Arbeitsunfällen und Berufskrankheiten (Einführung eines betriebsärztlichen Dienstes, Anstellung von Fachkräften für Arbeitssicherheit).
- Form, Ausgestaltung und Verwaltung von Sozialeinrichtungen (Betriebskantine, betriebliche Freizeit- und Erholungsheime).
- Zuweisung und Kündigung von Wohnräumen sowie die allgemeine Festlegung der Nutzungsbedingungen (Mietbedingungen, Verteilungsgrundsätze für Betriebsangehörige).
- Fragen der betrieblichen Lohngestaltung, insbesondere die Aufstellung von Entlohnungsgrundsätzen (Zeit-, Prämien-, Akkordlohn) und die Änderung von Entlohnungsmethoden (Art der Arbeitsbewertung). Festsetzung der Akkord- und Prämienätze und vergleichbarer leistungsbezogener Entgelte.
- Grundsätze über das betriebliche Vorschlagswesen (Bewertung von Verbesserungsvorschlägen und deren Umsetzung).



## (2) Gestaltung von Arbeitsplatz, -ablauf und -umgebung

- Der Betriebsrat hat das Recht, Maßnahmen zur Abwendung, Milderung oder zum Ausgleich von besonderen Belastungen zu verlangen (§§ 90 f. BetrVG).
- Die Aufgabe des Betriebsrats besteht also darin, beim Arbeitgeber darauf hinzuwirken, dass bei der Gestaltung von Arbeitsplatz und Arbeitsumgebung die Erkenntnisse der Arbeitswissenschaften berücksichtigt werden.
- Diese häufig unter dem Schlagwort "Humanisierung der Arbeitswelt" zusammengefassten Bestrebungen sollten bereits bei der Planung von Arbeitsplätzen zum tragen kommen, indem der Betriebsrat rechtzeitig unterrichtet wird und eine Beratung über die menschengerechte Gestaltung der Arbeit erfolgen kann.

### (3) Personelle Angelegenheiten

|                                                                                                                                                                                                                                                                                                              |                                                                                                                                                                                                                                                                                       |                                                                                                                                                                                                                                                                                        |
|--------------------------------------------------------------------------------------------------------------------------------------------------------------------------------------------------------------------------------------------------------------------------------------------------------------|---------------------------------------------------------------------------------------------------------------------------------------------------------------------------------------------------------------------------------------------------------------------------------------|----------------------------------------------------------------------------------------------------------------------------------------------------------------------------------------------------------------------------------------------------------------------------------------|
| <p>Allgemeine personelle Angelegenheiten</p> <p>§§ 92 bis 95 BetrVG</p>                                                                                                                                                                                                                                      | <p>Berufsbildung</p> <p>§§ 96 bis 98 BetrVG</p>                                                                                                                                                                                                                                       | <p>Personelle Einzelmaßnahmen</p> <p>§§ 99 bis 105 BetrVG</p>                                                                                                                                                                                                                          |
| <p><b>Informationsrecht</b> bei der Personalplanung und ein Beratungsrecht bei den sich daraus ergebenden Maßnahmen und der Vermeidung von Härten.</p> <p><b>Mitbestimmungsrecht</b> beim Inhalt von Personalfragebögen und der Aufstellung von Grundsätzen der Beurteilung und der Auswahl von Personal</p> | <p><b>Beratungsrecht</b> bei der Ausstattung betrieblicher Bildungseinrichtungen und der Einführung betrieblicher Bildungsmaßnahmen.</p> <p><b>Mitbestimmungsrecht</b> bei der Durchführung der Berufsbildung.</p> <p><b>Widerspruchsrecht</b> bei der Bestellung von Ausbildern.</p> | <p><b>Mitwirkungsrecht</b> bei Einstellung, Eingruppierung, Umgruppierung und Versetzung. Bei Vorliegen der in § 99 BetrVG beschriebenen Gründe kann der BR seine <b>Zustimmung</b> verweigern.</p> <p>Der BR ist vor jeder Kündigung <b>anzuhören</b>, sonst ist diese unwirksam.</p> |

S. 92 Abb. 60



#### (4) Wirtschaftliche Angelegenheiten

- Die Mitbestimmung im Rahmen **wirtschaftlicher Angelegenheiten** bezieht sich in der Hauptsache auf die Bildung und die Tätigkeit eines sog. Wirtschaftsausschusses und auf Fragen, die im Zusammenhang mit Betriebsänderungen stehen.
- Diese Mitbestimmung geschieht in Unternehmen mit mehr als 100 Arbeitnehmern über den **Wirtschaftsausschuss** (§ 106 BetrVG).

Er besteht aus drei bis sieben Mit-gliedern, davon mindestens einem Betriebsratsmitglied, die vom Betriebsrat bestimmt werden.



- Der Arbeitgeber hat mit dem Wirtschaftsausschuss fortlaufend u.a. folgende wirtschaftliche Angelegenheiten zu beraten:

- die wirtschaftliche und finanzielle Lage des Unternehmens
- die Produktions- und Absatzlage
- das Produktions- und Investitionsprogramm
- Rationalisierungsvorhaben Fabrikations- und Arbeitsmethoden
- die Einschränkung oder Stilllegung von Betrieben oder von Betriebsteilen
- die Verlegung von Betrieben oder von Betriebsteilen
- den Zusammenschluss von Betrieben
- die Änderung der Betriebsorganisation oder des Betriebszwecks

S. 93 ff.



## Die Einigungsstelle

Kommt es zu Meinungsverschiedenheiten zwischen Arbeitgeber und Betriebsrat, kann eine Einigungsstelle gebildet werden, die paritätisch von Arbeitgeber und Betriebsrat zusammengesetzt ist und deren Vorsitzender, auf dessen Person sich beide Seiten einigen müssen, unparteiisch zu sein hat (§ 76 BetrVG).

Häufig wird als **Vorsitzender** ein **Arbeitsrichter** gewählt.

Die **Kosten** der Einigungsstelle und auch die Kosten für das Arbeitsentgelt des neutralen Vorsitzenden trägt der Arbeitgeber (§ 76 a BetrVG).

## Die Besetzung der Einigungsstelle

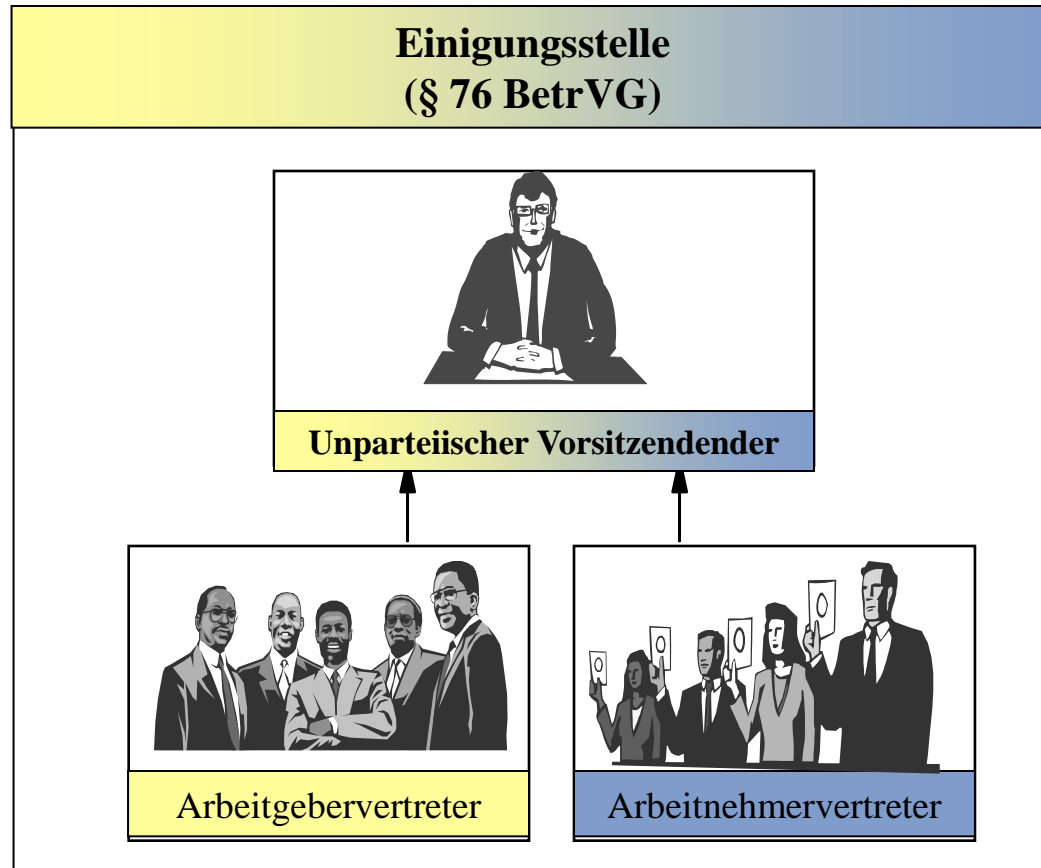

S. 94 Abb. 61

Jung, Hans: Personalwirtschaft, 9. Aufl., München 2010.

© Oldenbourg Wissenschaftsverlag





## Die Stellung der Gewerkschaften

Gegenüber dem Betriebsverfassungsgesetz von 1952 hat das Gesetz von 1972 die Stellung der Gewerkschaften in den Betrieben wesentlich gestärkt. Von besonderer Bedeutung sind die folgenden Rechte:

- Das **Zutrittsrecht** zum Betrieb (§ 2 Abs. 2 BetrVG)
- Das **Beuge- und Erzwingungsrecht** bei erheblichen Verstößen des Arbeitgebers gegen seine Verpflichtung (§ 23 Abs. 2 BetrVG)
- Die **Initiativrechte** bei Betriebsratswahlen und Betriebsversammlungen (§ 14 Abs. 5 BetrVG: Wahlvorschlagsrecht, § 16 Abs. 2 BetrVG in Verb. mit § 23 Abs. 2 BetrVG: Bestellung des Wahlvorstandes, und § 43 Abs. 4 BetrVG: Einberufung der Betriebsversammlung)
- Das **Strafantragsrecht** bei Straftaten gegen Betriebsverfassungsorgane und ihre Mitglieder (§ 119 Abs. 2 BetrVG)

## Die Jugend- und Auszubildendenvertretung

- In Betrieben, denen regelmäßig mindestens fünf jugendliche Arbeitnehmer, die das 18. Lebensjahr noch nicht vollendet haben, oder zu ihrer Ausbildung beschäftigte Arbeitnehmer, die das 25. Lebensjahr noch nicht vollendet haben, angehören, kann eine Jugend- und Auszubildendenvertretung gewählt werden (§ 60 BetrVG).
- Wählbar sind alle Arbeitnehmer des Betriebs, die das 25. Lebensjahr noch nicht vollendet haben und nicht Mitglied des Betriebsrates sind.

| Zahl der Jugendlichen<br>und Auszubildenden |     |       | Jugend- und<br>Auszubilden-<br>denvertreter |
|---------------------------------------------|-----|-------|---------------------------------------------|
| 5                                           | bis | 20    | 1                                           |
| 21                                          | bis | 50    | 3                                           |
| 51                                          | bis | 150   | 5                                           |
| 151                                         | bis | 300   | 7                                           |
| 301                                         | bis | 500   | 9                                           |
| 501                                         | bis | 700   | 11                                          |
| 701                                         | bis | 1.000 | 13                                          |
| mehr                                        | als | 1.000 | 15                                          |

Die Jugend- und Auszubildendenvertretung, die kein eigenständiges Organ der Betriebsverfassung, sondern eine Unterstützung des Betriebsrats ist, soll die Belange aller Auszubildenden und aller jugendlichen Mitarbeiter wahrnehmen, die noch keine 18 Jahre alt sind.

Die Jugend- und Auszubildendenvertreter können im BR mitstimmen, wenn die anstehenden Beschlüsse vorwiegend jugendliche Arbeitnehmer betreffen.

# Der Sprecherausschuss der leitenden Angestellten

- Laut Sprecherausschussgesetz (SprAuG) ist in Betrieben mit mindestens zehn leitenden Angestellten ein Sprecherausschuss zu wählen.
- Er vertritt die Belange der leitenden Angestellten (§ 25 SprAuG). Seine Aufgaben und Rechte entsprechen weitgehend denen des Betriebsrats.
- Er hat **Mitwirkungsrechte** bezüglich der Arbeitsbedingungen und Beurteilungsgrundsätze (§ 30 SprAuG), im Bereich personeller Maßnahmen (§ 31 SprAuG) und bei wirtschaftlichen Angelegenheiten (§ 32 SprAuG).

| Zahl der leitenden Angestellten |     |     | Zahl der Sprecher-Ausschussmitglieder |
|---------------------------------|-----|-----|---------------------------------------|
| 10                              | bis | 20  | 1                                     |
| 21                              | bis | 100 | 3                                     |
| 101                             | bis | 300 | 5                                     |
| mehr als                        |     | 300 | 7                                     |

Männer und Frauen entsprechend ihrem zahlenmäßigen Verhältnis vertreten sein. Die Amtszeit des Sprecherausschusses beträgt vier Jahre (§ 5 SprAuG).

Die **Wahlen**, deren Ablauf in den §§ 5 bis 8 SprAuG festgelegt ist, finden regelmäßig alle vier Jahre in der Zeit vom 1. März bis zum 31. Mai statt.



## Mitbestimmung auf Unternehmensebene

- Die Unternehmensverfassung beteiligt die Arbeitnehmer an der Gestaltung der Unternehmenspolitik und soll den Arbeitnehmern eine unmittelbare Einflussnahme auf die unternehmerischen Entscheidungen einräumen.
- Die Arbeitnehmer bilden dabei kein eigenes Organ wie den Betriebsrat, sondern werden in die Organe des Unternehmens integriert. Die Arbeitnehmermitbestimmung im Unternehmensbereich gilt im Wesentlichen nur für Kapitalgesellschaften.  
Dabei vollzieht sich die Mitbestimmung auf Unternehmensebene durch die Mitgliedschaft der Arbeitnehmer im **Aufsichtsrat**.
- Ziel der Mitbestimmung auf Unternehmensebene ist die Mitentscheidung der durch den Gesetzgeber zu Partnern der Eigentümer des Unternehmens gemachten Arbeitnehmer im "eigenen" Unternehmen.
- Die Mitbestimmung auf Unternehmensebene wird im Wesentlichen durch drei Gesetze geregelt, dem **MontanMitbestimmungsgesetz** von 1951 (Montan MitbestG), dem **Drittelbeteiligungsgesetz** von 2004 (DrittelbG) und dem **Mitbestimmungsgesetz** von 1976 (MitbestG).
- Welches dieser Gesetze jeweils für ein Unternehmen gültig ist, wird durch dessen Rechtsform, von der Art des Unternehmensgegenstandes und von der Anzahl der Mitarbeiter bestimmt.

## Die Unternehmensverfassung im Überblick

| Rechtsform/Zahl der Arbeitnehmer                                                                    |                                                 | bis 500 | 501-1.000                     | 1.001-2.000                   | über 2.000                         |
|-----------------------------------------------------------------------------------------------------|-------------------------------------------------|---------|-------------------------------|-------------------------------|------------------------------------|
| Privatrechtliche<br>Unternehmungen<br>mit Ausnahme<br>von Tendenz-<br>und Montan-<br>Unternehmungen | GmbH & Co KG<br>AG & Co KG                      |         |                               |                               | § 4 MitbestG                       |
|                                                                                                     | VVaG mit<br>Bestehendem Aufsichtsrat            |         | § 1 Abs. 1 Nr. 4<br>DrittelbG | § 1 Abs. 1 Nr. 4<br>DrittelbG | § 1 Abs. 1 Nr. 4<br>DrittelbG      |
|                                                                                                     | Erwerbs- und<br>Wirtschafts-,<br>Genossenschaft |         | § 1 Abs. 1 Nr. 5<br>DrittelbG | § 1 Abs. 1 Nr. 5<br>DrittelbG | § 1 Mitbestim-<br>mungsgesetz 1976 |
|                                                                                                     | GmbH                                            |         | § 1 Abs. 1 Nr. 3<br>DrittelbG | § 1 Abs. 1 Nr. 3<br>DrittelbG | § 1 Mitbestim-<br>mungsgesetz 1976 |
|                                                                                                     | KGaA                                            |         | § 1 Abs. 1 Nr. 2<br>DrittelbG | § 1 Abs. 1 Nr. 2<br>DrittelbG | § 1 Mitbestim-<br>mungsgesetz 1976 |
|                                                                                                     | AG                                              |         | § 1 Abs. 1 Nr. 1<br>DrittelbG | § 1 Abs. 1 Nr. 1<br>DrittelbG | § 1 Mitbestim-<br>mungsgesetz 1976 |
| Montanunterneh-<br>mungen nach § 1<br>MontanMitbestG                                                | GmbH                                            |         | § 1 Abs. 1 Nr. 3<br>DrittelbG | § 1, Abs. 2<br>MontanMitbestG | § 1, Abs. 2<br>MontanMitbestG      |
|                                                                                                     | AG                                              |         | § 1 Abs. 2 Nr. 1<br>DrittelbG | § 1, Abs. 2<br>MontanMitbestG | § 1, Abs. 2<br>MontanMitbestG      |

S. 98 Abb. 64



Das MontanMitbestimmungsgesetz (von 1951)

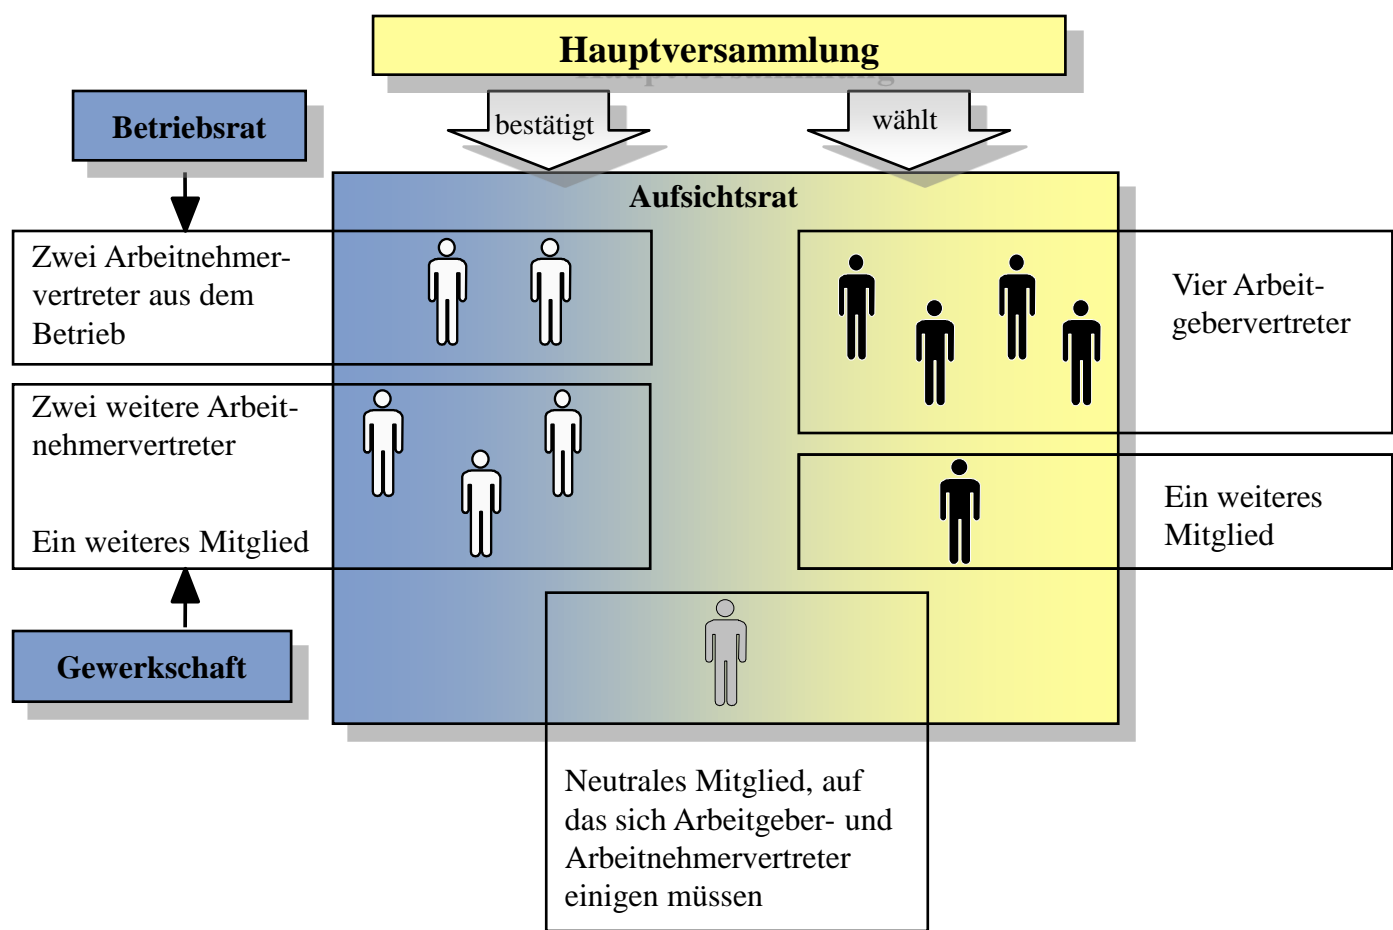

S. 99 Abb. 65



Besetzung des Aufsichtsrates nach dem Drittelbeteiligungsgesetz (von 2004)

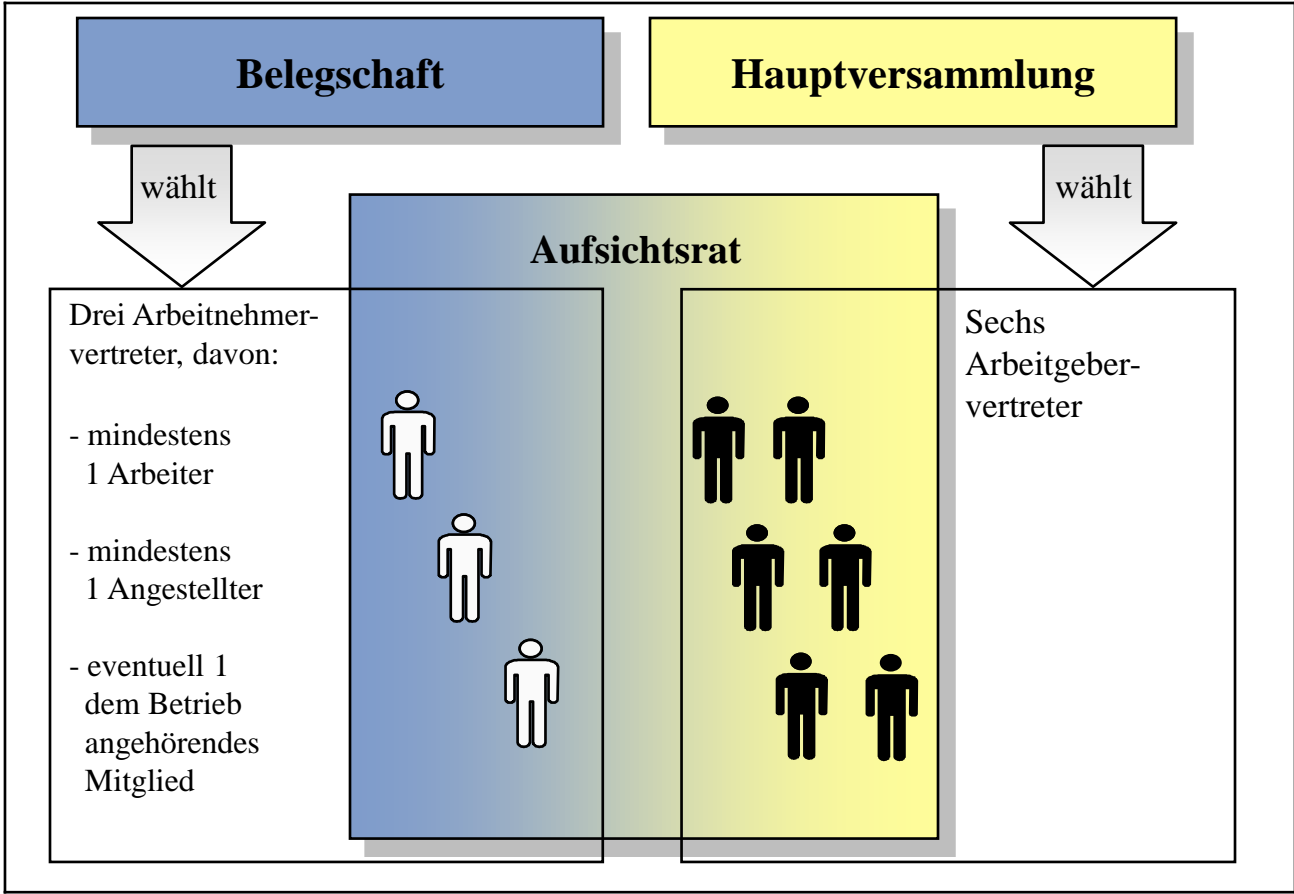

S. 102 Abb. 66

Jung, Hans: Personalwirtschaft, 9. Aufl., München 2010.

© Oldenbourg Wissenschaftsverlag



# Zusammensetzung des Aufsichtsrats nach dem Mitbestimmungsgesetz (von 1976)

| Mitarbeiter   | Aufsichtsrats-<br>mitglieder | Betriebsintern<br>e Vertreter | Gewerkschafts-<br>vertreter | Anteilseigner-<br>vertreter |
|---------------|------------------------------|-------------------------------|-----------------------------|-----------------------------|
| 2.000         | 12                           | 4                             | 2                           | 6                           |
| 10.000-20.000 | 16                           | 6                             | 2                           | 8                           |
| über 20.000   | 20                           | 7                             | 3                           | 10                          |

- In den Aufsichtsrat eines herrschenden Konzernunternehmens können in gleicher Weise Arbeitnehmer dieses Unternehmens sowie Arbeitnehmer der übrigen Konzernunternehmen gewählt werden.
- Für die Aufsichtsratswahlen gelten die Arbeitnehmer sämtlicher Konzernunternehmen als Arbeitnehmer des Unternehmens.



## Zusammensetzung des Aufsichtsrats nach dem Mitbestimmungsgesetz

(von 1976)

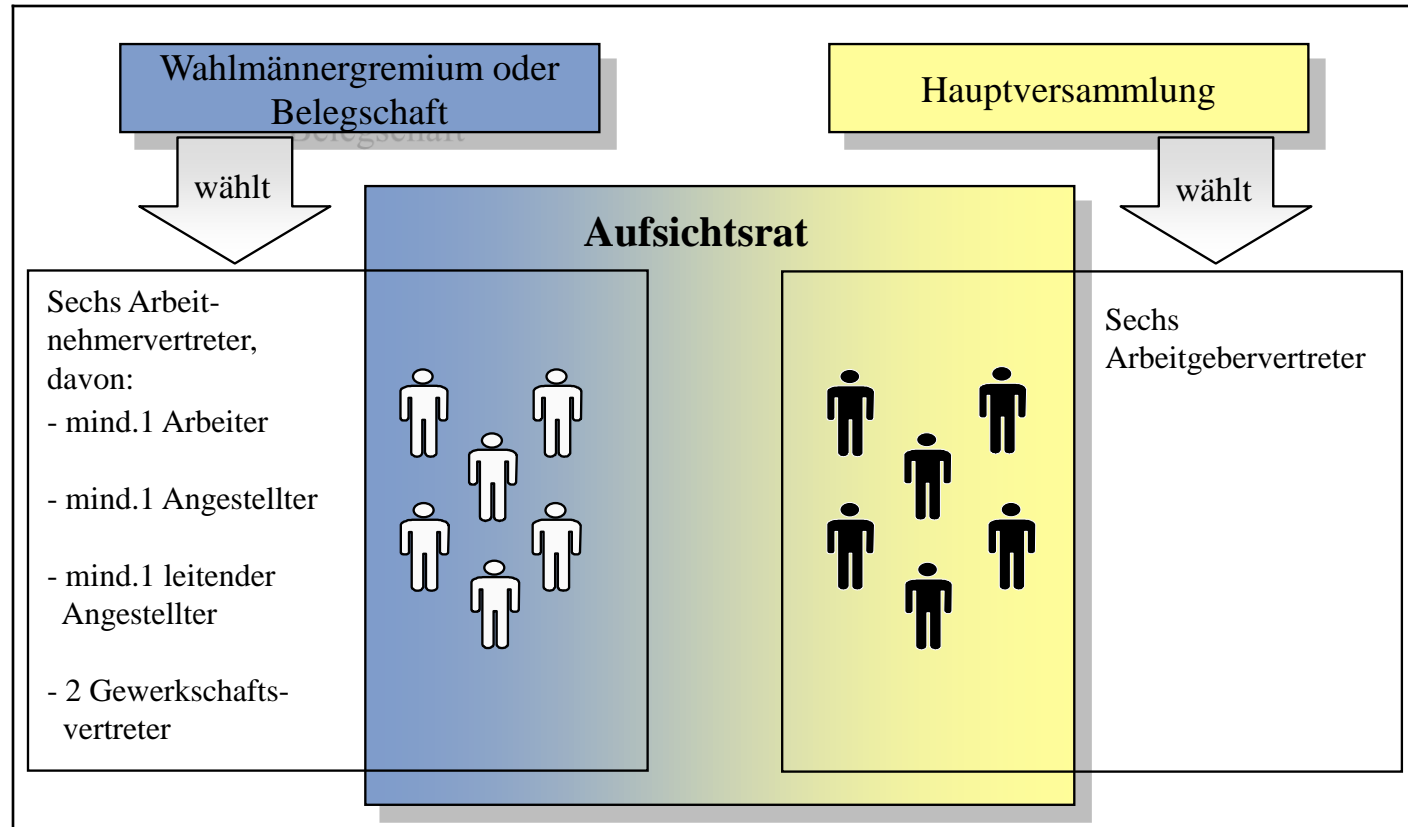

S. 104 Abb. 68

Jung, Hans: Personalwirtschaft, 9. Aufl., München 2010.

© Oldenbourg Wissenschaftsverlag



## Wahl des Aufsichtsrats nach dem MitbestG von 1976

- Alle Aufsichtsratsmitglieder der Arbeitnehmer werden in **Urwahl** oder durch **Wahlmänner** gewählt.
- In Unternehmen mit bis zu 8.000 Arbeitnehmern ist die Urwahl die Regel, in Unternehmen mit mehr als 8.000 Arbeitnehmern ist die Wahl durch Wahlmänner die Regel.
- Die jeweils andere Wahlform kann beschlossen werden, wenn dies von mindestens einem Zwanzigstel der Wahlberechtigten beantragt wird und sich mindestens die Hälfte der wahlberechtigten Belegschaft an der Abstimmung beteiligt.

## Entscheidungsfindung im Aufsichtsrat

- Da der Aufsichtsrat paritätisch besetzt ist, können bei Abstimmungen Patt-Situationen auftreten.
- Um die Beschlussfähigkeit dennoch zu gewährleisten, erhält der Aufsichtsratsvorsitzende bei wiederholter Stimmengleichheit eine **zweite Stimme**.
- Mit dieser Mehrheit kann auch ein Aufsichtsratsmitglied der Arbeitnehmer zum Aufsichtsratsvorsitzenden gewählt werden.
- Wird jedoch die 2/3 Mehrheit für keinen der beiden erreicht, so wählen die Aufsichtsratsmitglieder der Anteilseigner den **Aufsichtsratsvorsitzenden** und die Aufsichtsratsmitglieder der Arbeitnehmer seinen **Stellvertreter**.

S. 104 f



## **Arbeitsgerichtsbarkeit**

- Die Arbeitsgerichtsbarkeit entscheidet bei Streitigkeiten, die die Arbeitswelt betreffen.
- Dies können Differenzen zwischen einzelnen Arbeitgebern und Arbeitnehmern oder deren Verbänden und Vertretungen sein.
- Durch das Arbeitsgerichtsgesetz (ArbGG) von 1953 ist die Arbeitsgerichtsbarkeit gegenüber anderen Gerichtszweigen selbstständig.
- Grundlage für das ArbGG ist die Zivilprozessordnung (ZPO).

## **Wichtigste Unterschiede sind:**

- kürzere Fristen
- erheblich billigere Verfahren
- ein höherer Stellenwert des Güteverfahrens
- größerer Praxisbezug durch Laienrichter
- die Rechtsschutzvertreter sind Rechtsanwälten gleichgestellt

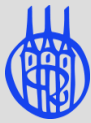

# Aufbau und Verfahrensablauf der Arbeitsgerichtsbarkeit

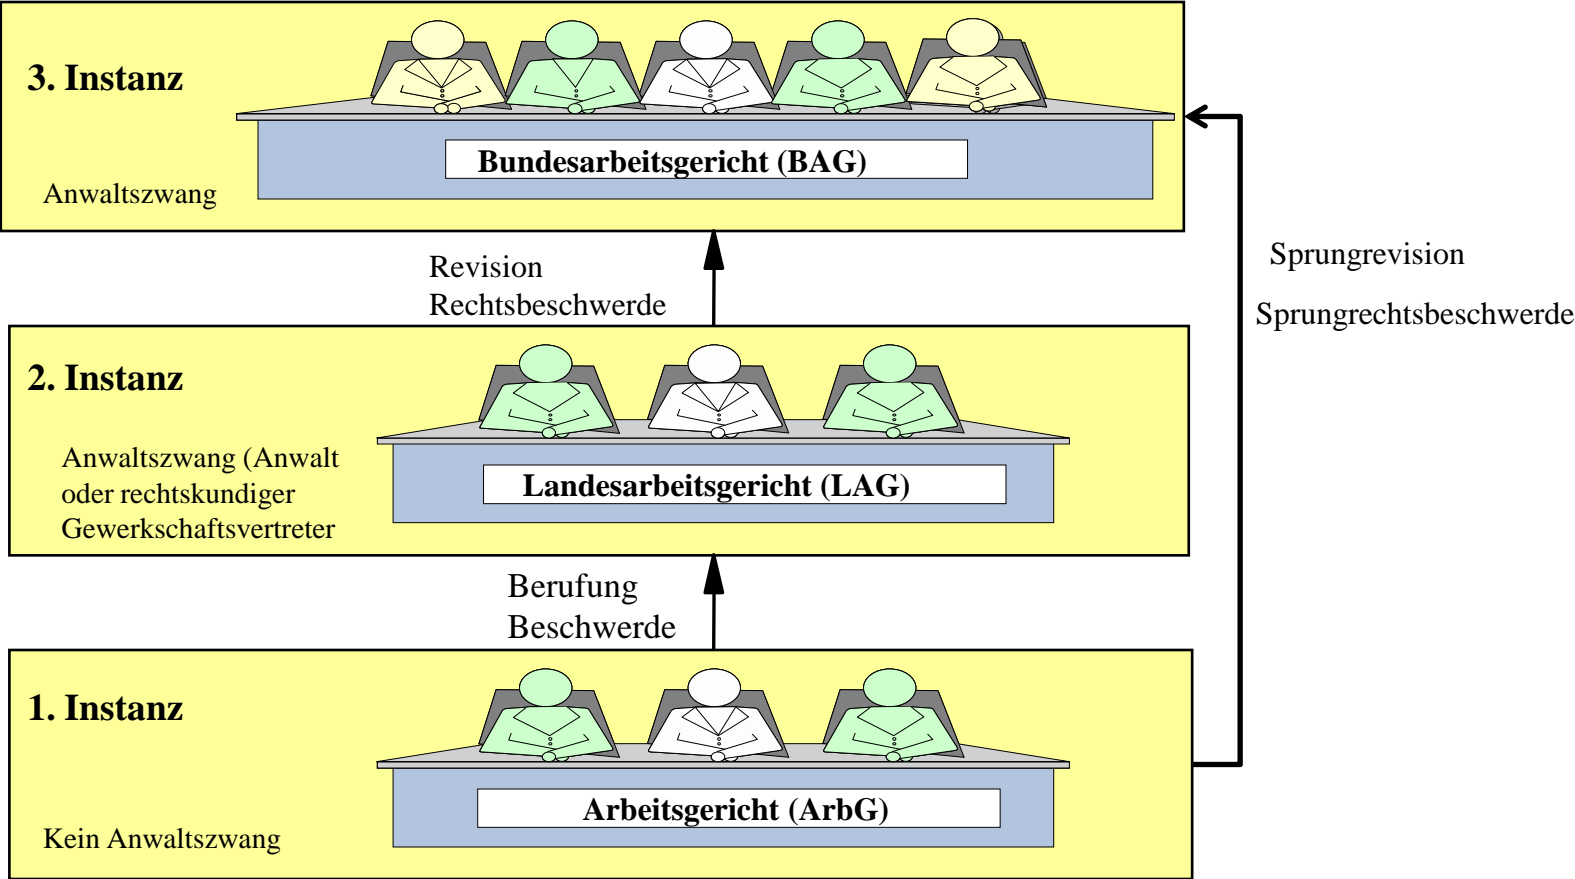

○ Vorsitzender      ● Laienrichter      ● Bundesrichter

S. 107 Abb. 69



## Sozialgerichtsbarkeit

Für alle Streitigkeiten auf dem Gebiet des Sozialrechts gibt es heute eine besondere, von den Verwaltungsbehörden getrennte Sozialgerichtsbarkeit.

Zu unterscheiden sind drei Instanzen:

- das **Sozialgericht** verhandelt und entscheidet in Kammern und ist mit drei Richtern besetzt (ein Berufsrichter und zwei ehrenamtliche Richter).
- das **Landes- und das Bundessozialgericht** entscheiden in Senaten (drei Berufsrichter und zwei ehrenamtliche Richter).
- das **Landessozialgericht** entscheidet über die Berufung, das Bundessozialgericht über die Revision.  
Rechtsmittel in der Sozialgerichtsbarkeit sind: Berufung, Revision und Beschwerde.  
Das Verfahren ist kostenlos.

Verwaltung und Rechtsprechung sind klar voneinander getrennt (Grundsatz der Gewaltenteilung).



## Notizen
