# Supplementary material
Source: publisher site journal article supplement (https://www.degruyterbrill.com/publication/isbn/9783486719048/downloadAsset/9783486719048_Folien--de.zip)
Supplement: Supplementary file 4 [file 9783486719048_Folien--de.zip]

# Teil C

## Leistungserhalt und -förderung

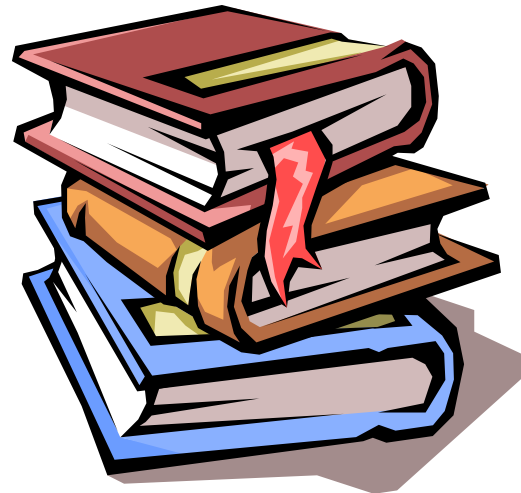

Januar 2011

## **Inhaltsverzeichnis**

- 1. Motivation im Arbeitsprozess**
- 2. Personalführung**
- 3. Betriebliche Anreizsysteme**
- 4. Betriebliche Sozialarbeit**

# 1. Motivation im Arbeitsprozess

- 1.1 Das Motiv
- 1.2 Die Ermittlung von Motiven
- 1.3 Grundmodelle der arbeitenden Menschen
- 1.4 Motivationstheorien
- 1.5 Die Wirkung der Motivationsmittel in der Praxis
- 1.6 Das Betriebsklima
- 1.7 Mobbing

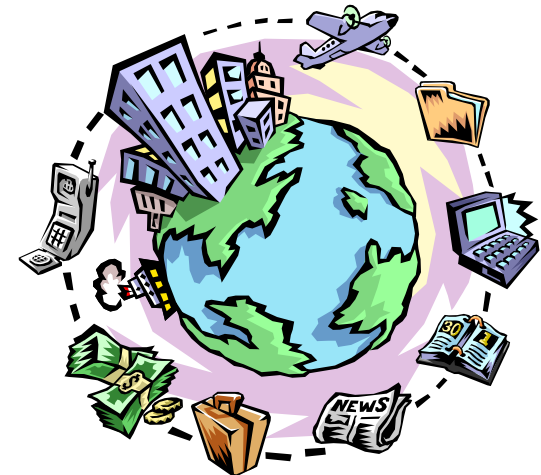

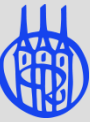

## Das Motiv

- **Motive** werden als Beweggründe menschlichen Verhaltens angesehen, die zwischen Mangelzustand und Sättigung periodisch hin und her schwanken.
- Ein **Motiv** beinhaltet zum einen ein Bedürfnis, welches aus einem Mangel empfinden resultiert und zum anderen eine Erwartung, durch ein Verhalten den Mangel zu befriedigen.
- **Motive** bestimmen demnach Antrieb und Richtung menschlichen Verhaltens.

Motiv + Anreiz = Aktion (Verhalten)

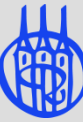

## Der Motivationsprozess

Man kann den **Motivationsprozess** in **fünf Schritte** einteilen:

1. Ein Bedürfnis entsteht.
2. Es baut sich eine Bedürfnisspannung auf.
3. Unter der Voraussetzung, dass eine reale Chance zur Bedürfnisbefriedigung besteht, werden Energien frei, die eine bestimmte Aktivität bewirken.
4. Während der zunehmenden Bedürfnisbefriedigung kommt es zum Spannungsabbau.
5. Schließlich entsteht ein neues (anderes) Bedürfnis.

"Motivation ist also ein Prozess, in dem Menschen ihre von individuell geprägten Bedürfnissen und Werten produzierte Energie auf ein Ziel hinlenken"

## Die einzelnen Phasen des Motivationsprozesses

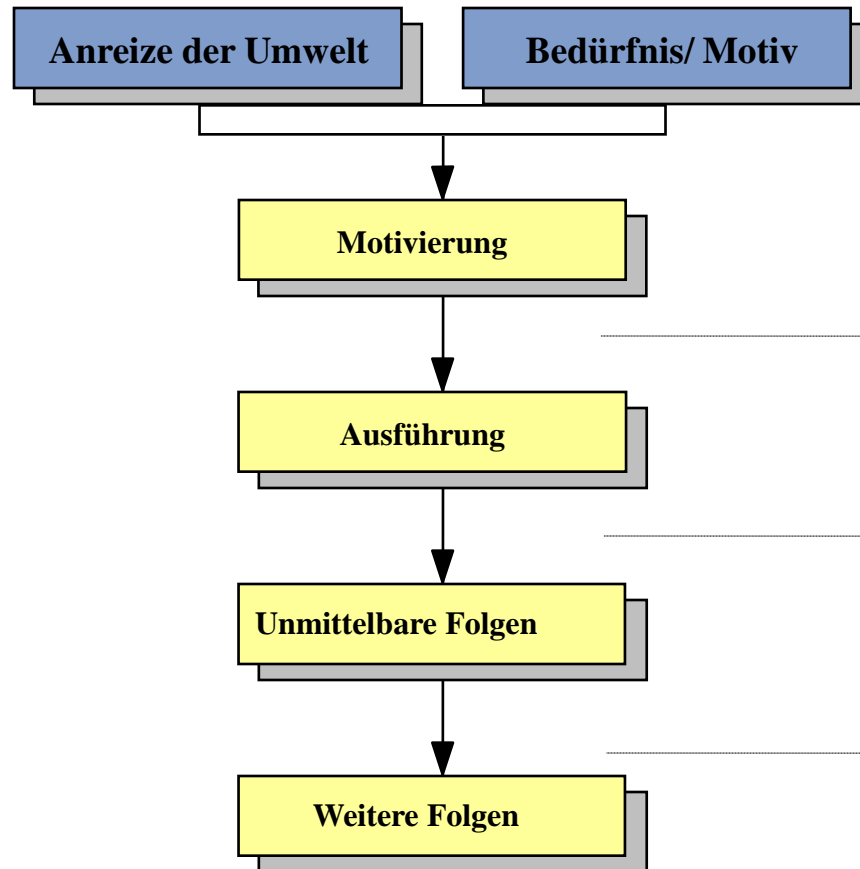

### Phase der Motivierung:

Die Motive der Personen verbinden sich mit dem Anreiz. Zu diesem Zweck werden unmittelbare und weitere Folgen vorweg überdacht und beurteilt.

Sind sie erstrebenswert und ist die Erreichbarkeit persönlich angemessen, so entsteht der Entschluss: "Ich will handeln!"

### Phase der Ausführung:

Der Entschluss wird in die Tat umgesetzt.

### Phase der unmittelbaren Folgen:

Hier setzt der Zustand der Zufriedenheit ein, z.B. über Informationsgewinn, erworbene Fähigkeiten, die Erhöhung des Selbstwertgefühls etc.

### Phase der weiteren Folgen:

Beruflicher Vorteil, Anerkennung, Lob, Karriere, soziale Geltung etc.



## Die Einteilung der Motive

### ➤ **Physische, psychische und soziale Motive**

- Zu den **physischen Motiven** zählen biologische Bedürfnisse, wie z.B. Hunger, Durst und Wohnen.
- **Psychische Motive** können beispielsweise Unabhängigkeit, Selbstverwirklichung und Selbstentfaltung sein.
- **Soziale Motive** sind auf die Anerkennung durch andere Menschen ausgerichtet. Hier können Freundschaft und Zugehörigkeit zu bestimmten Gruppen genannt werden.

### ➤ **Primäre und sekundäre Motive**

- **Primäre Motive** wie beispielweise Hunger und Durst sind Motive, die jeder Mensch von Geburt an instinktiv verfolgt.
- Die **sekundären Motive** sind Mittel zur Befriedigung anderer Motive. Das Geldmotiv stellt ein Beispiel sekundärer Motive dar, da sich mit Geld viele primäre Motive befriedigen lassen.



### ➤ Intrinsische und extrinsische Motive

Bei den Motiven beruflicher Tätigkeit werden in der Motivationspsychologie intrinsische und extrinsische Motive unterschieden.

- Die **intrinsischen Motive** finden ihre Befriedigung in der Arbeit selbst. Je mehr einer Person eine Tätigkeit Spaß macht, desto produktiver ist sie. Bei einfachen Aufgaben ist die intrinsische Motivation gering, bei komplexen Aufgaben relativ hoch.
- Die **extrinsischen Motive** können nicht durch die Tätigkeit alleine, sondern durch die Folgen der Arbeit oder durch deren Begleitumstände befriedigt werden. Die berufliche Tätigkeit ist somit nur Mittel zur Verfolgung anderer Motive. Als extrinsische Motive können das Geld-, Sicherheits- und Prestigemotiv genannt werden.





Neben dieser Einteilung gibt es noch eine Reihe weiterer **Einteilungskriterien**, die von der jeweils angewandten Theorie abhängig sind:

- |                                 |                                                                                     |                                                               |
|---------------------------------|-------------------------------------------------------------------------------------|---------------------------------------------------------------|
| • <b>Bewusstseinsgrad</b>       |    | bewusste oder unbewusste Motive                               |
| • <b>Extensität</b>             |    | das Gesamte oder Teilbereiche des Erlebens ausfüllende Motive |
| • <b>Intensität</b>             |    | starke oder schwache Motive                                   |
| • <b>Verlauf</b>                |    | periodisch oder aperiodisch auftretende Motive                |
| • <b>Zentralität oder Tiefe</b> |  | bedeutende oder unwichtige Motive                             |

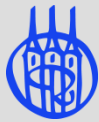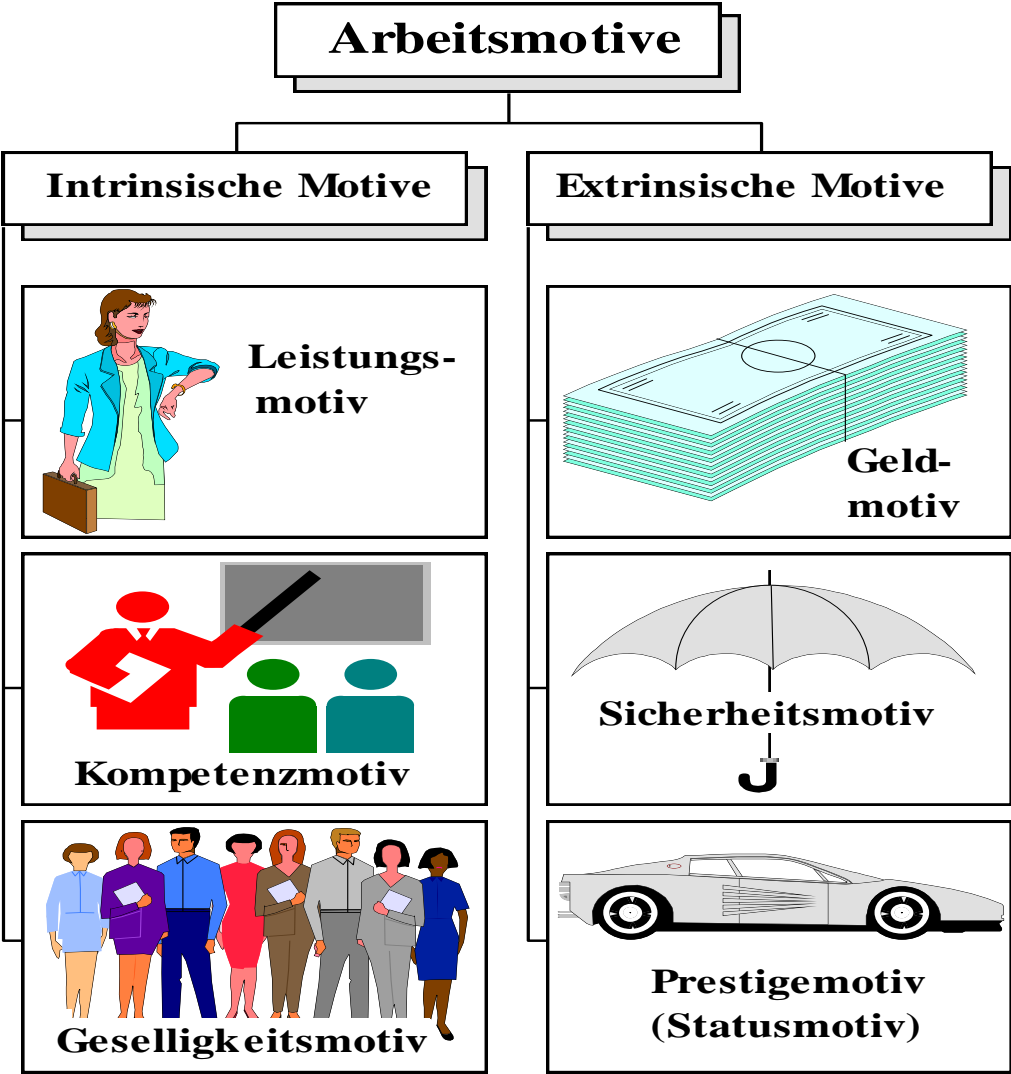

S. 371 Abb. 2



## Die Ermittlung von Motiven

### ➤ Introspektion

Bei der Introspektion untersucht der Mensch selbst die Ursache seines Handelns. Die persönlichen Beweggründe können jedoch nur subjektiv ermittelt werden, d.h. sie sind objektiv nicht nachprüfbar.

**Aus diesem Grund** kommt für betriebliche Belange eine Introspektion nur bedingt in Frage, da die Ergebnisse lediglich durch Gespräche oder schriftliche Befragungen ermittelt werden können.

### ➤ Fremdbeobachtung

Die Fremdbeobachtung wird von einem oder mehreren Beobachtern durchgeführt, wobei durch Beobachtung des Verhaltens eines Mitarbeiters auf die zugrundegelegten Motive geschlossen wird.

### ➤ Mitarbeiterbefragung

Mittels einer Mitarbeiterbefragung lassen sich relativ genaue Ergebnisse erzielen. Voraussetzung hierfür ist allerdings ein hohes Vertrauensverhältnis zwischen den Führungskräften und den Mitarbeitern, da sonst Informationen zurückgehalten werden können.

## Grundmodelle der arbeitenden Menschen

Motivationstheorien haben die Aufgabe, das Zustandekommen und die Wirkungen der Motivation und des menschlichen Verhaltens zu erklären. Will man sich mit den verschiedenen Motivationstheorien befassen, ist es sinnvoll, das Menschenbild zu betrachten, das den Theorien zugrunde gelegt wird.

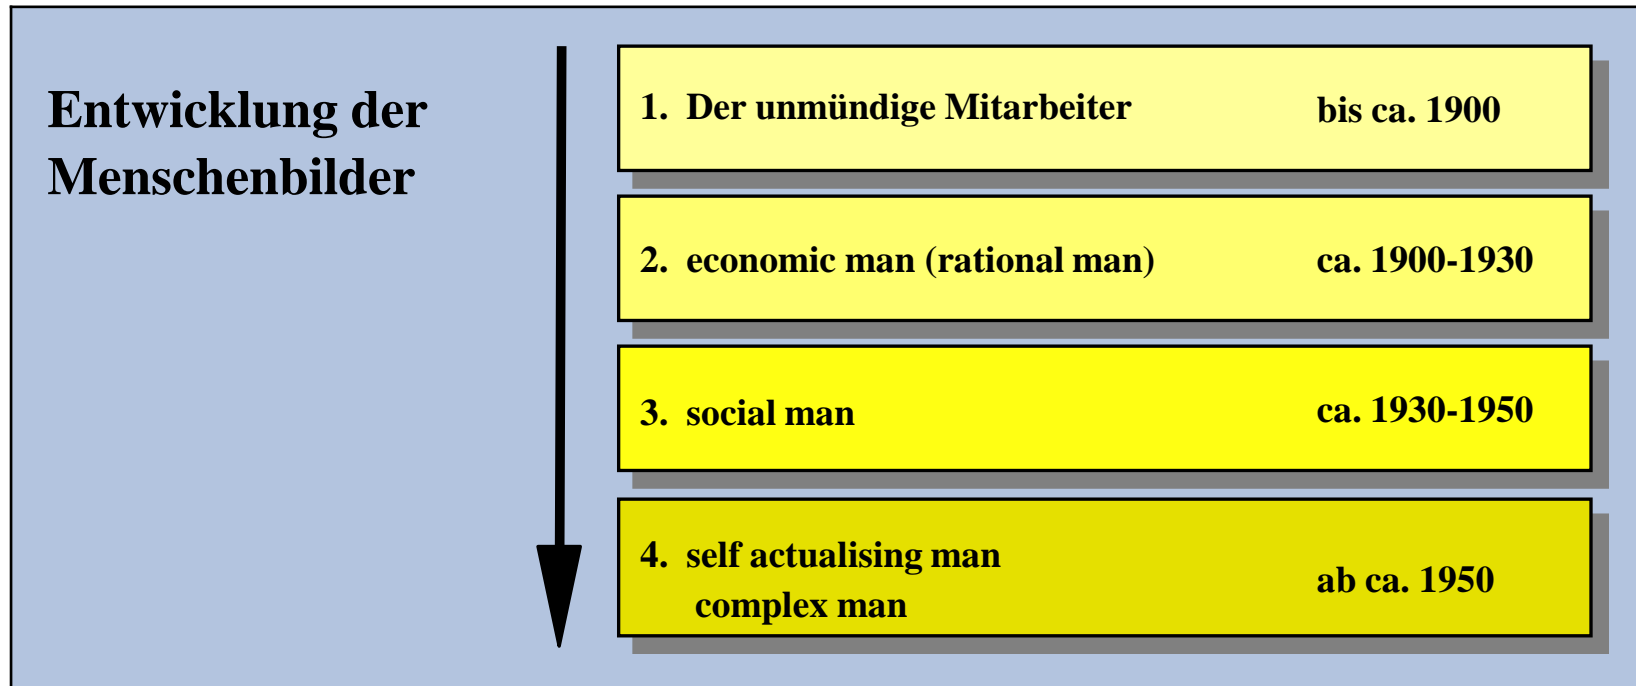

S. 375 Abb. 3

Jung, Hans: Personalwirtschaft, 9. Aufl., München 2010.

© Oldenbourg Wissenschaftsverlag

## Bestimmungsgrößen der Arbeitsleistung nach Taylor

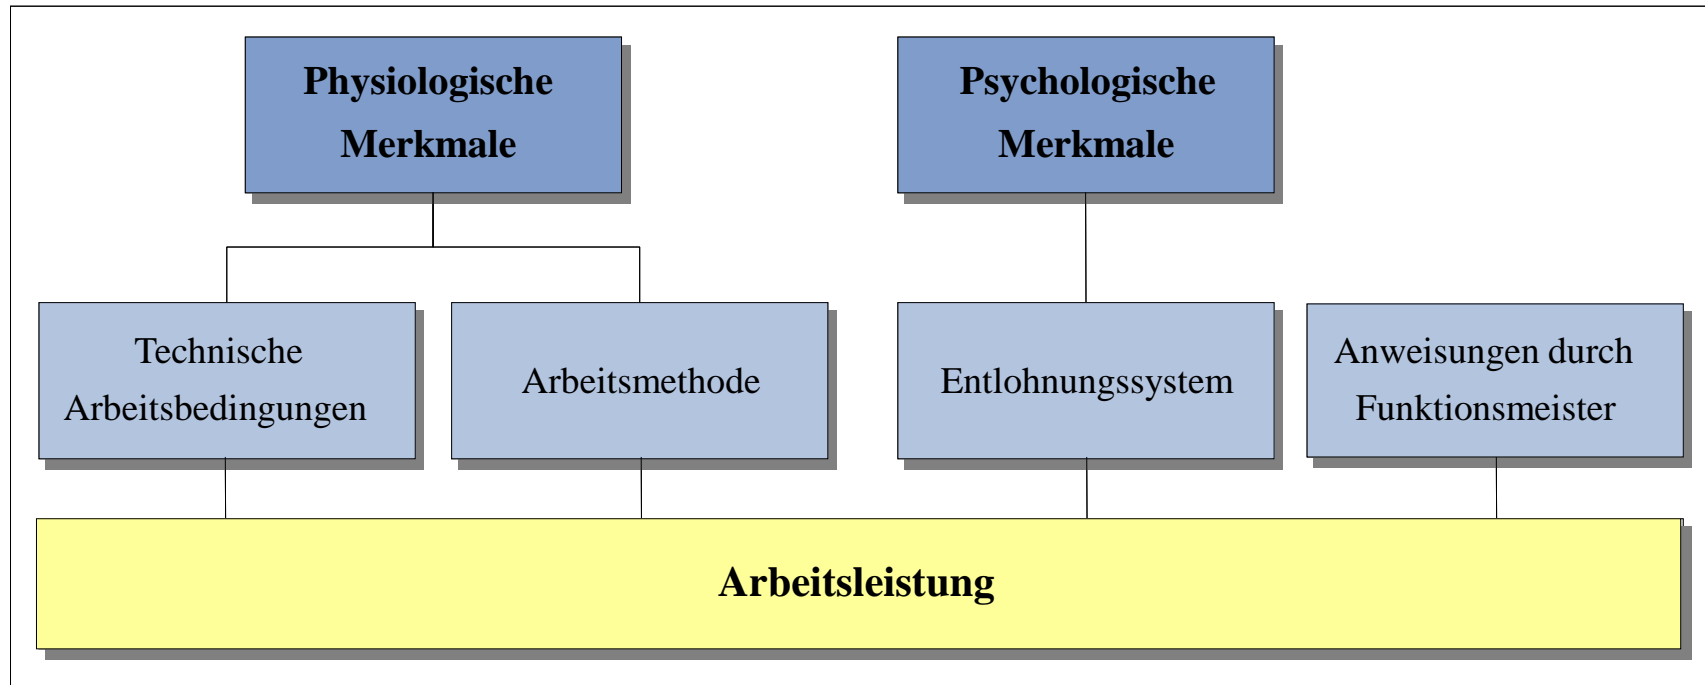

S. 377 Abb. 4

Jung, Hans: Personalwirtschaft, 9. Aufl., München 2010.

© Oldenbourg Wissenschaftsverlag



## Sozialwissenschaftliches Grundmodell

### **„self-actualising man“**

- der sich selbst entwickelnden und sich selbst verwirklichenden Menschen, der nach Autonomie strebt und motiviert ist, wenn er sich entfalten kann

### **„complex man“**

- ein vielschichtig von den verschiedensten Faktoren beeinflusster Mensch

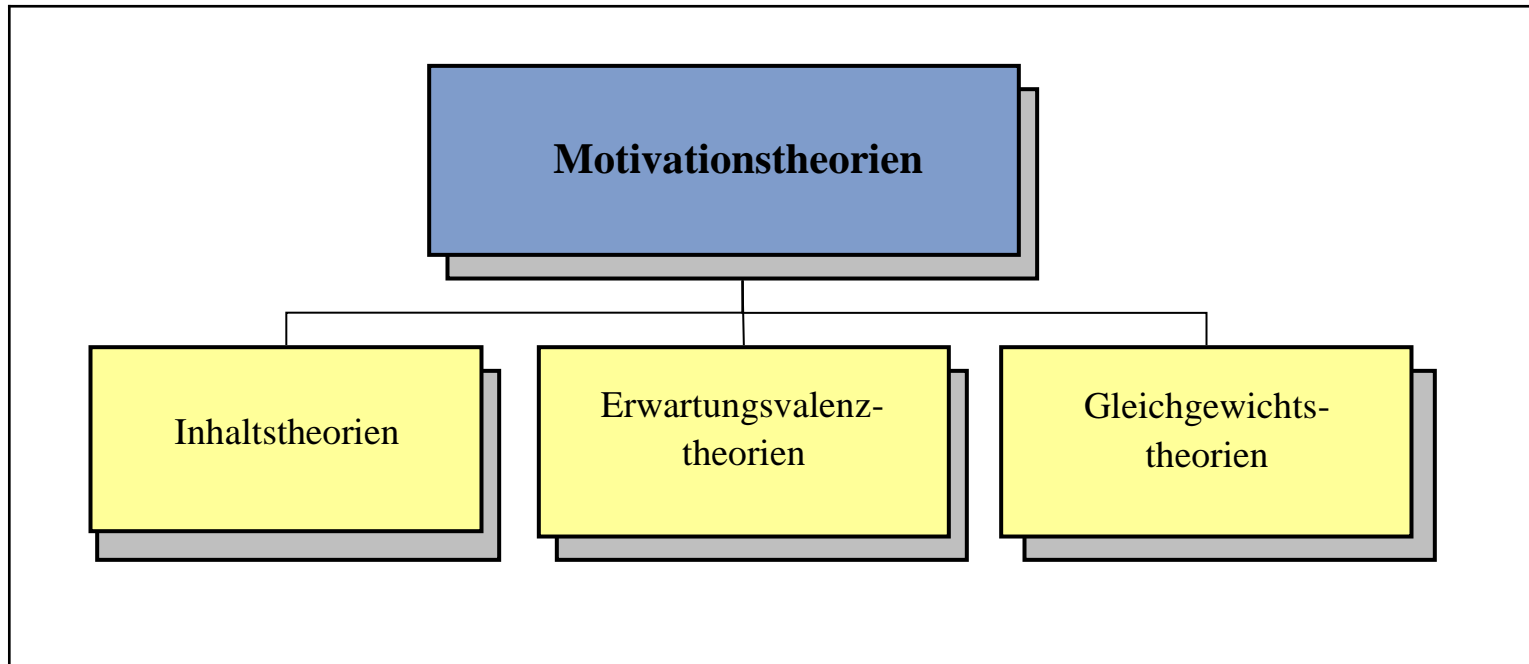

Die **Erwartungsvalenztheorie** und die **Gleichgewichtstheorie** werden in der Literatur auch unter dem Begriff „**Prozesstheorien**“ zusammengefasst.

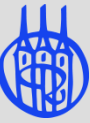

## Inhaltstheorien

- **Die Bedürfnispyramide nach Maslow**
- **Die E-R-G-Theorie von Alderfer**
- **Die Zweifakorentheorie von Herzberg**
- **Die Theorie der gelernten Bedürfnisse von Mc Clelland**
- **Die X-Y-Theorie Mc Gregor**

S. 382 ff.

Jung, Hans: Personalwirtschaft, 9. Aufl., München 2010.

© Oldenbourg Wissenschaftsverlag



## Die Bedürfnispyramide nach Maslow (1954)

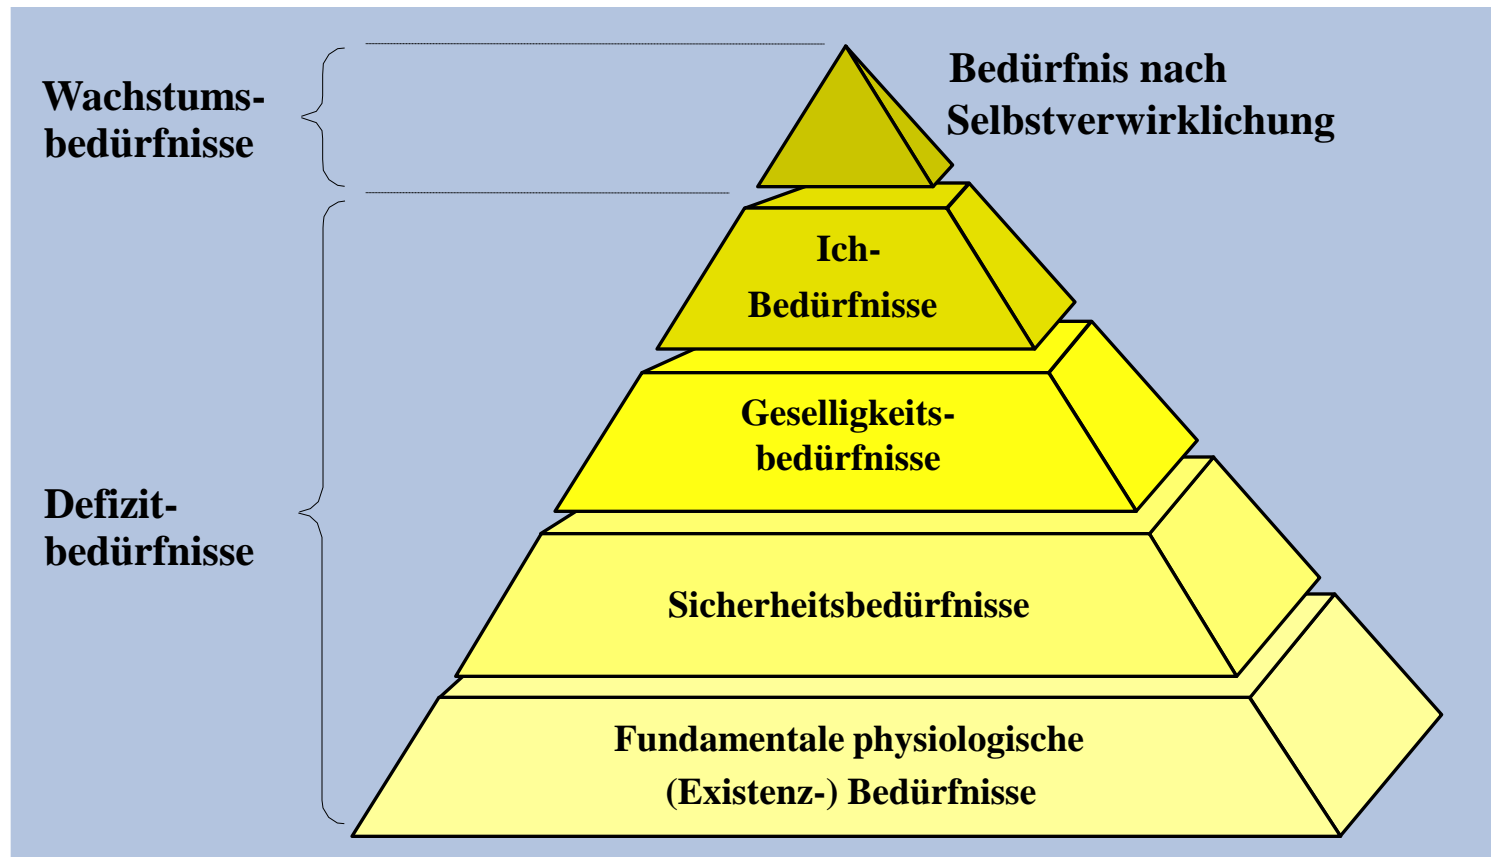

S. 383 Abb. 6

Jung, Hans: Personalwirtschaft, 9. Aufl., München 2010.

© Oldenbourg Wissenschaftsverlag

## Die Befriedigung der Bedürfnisse am Arbeitsplatz

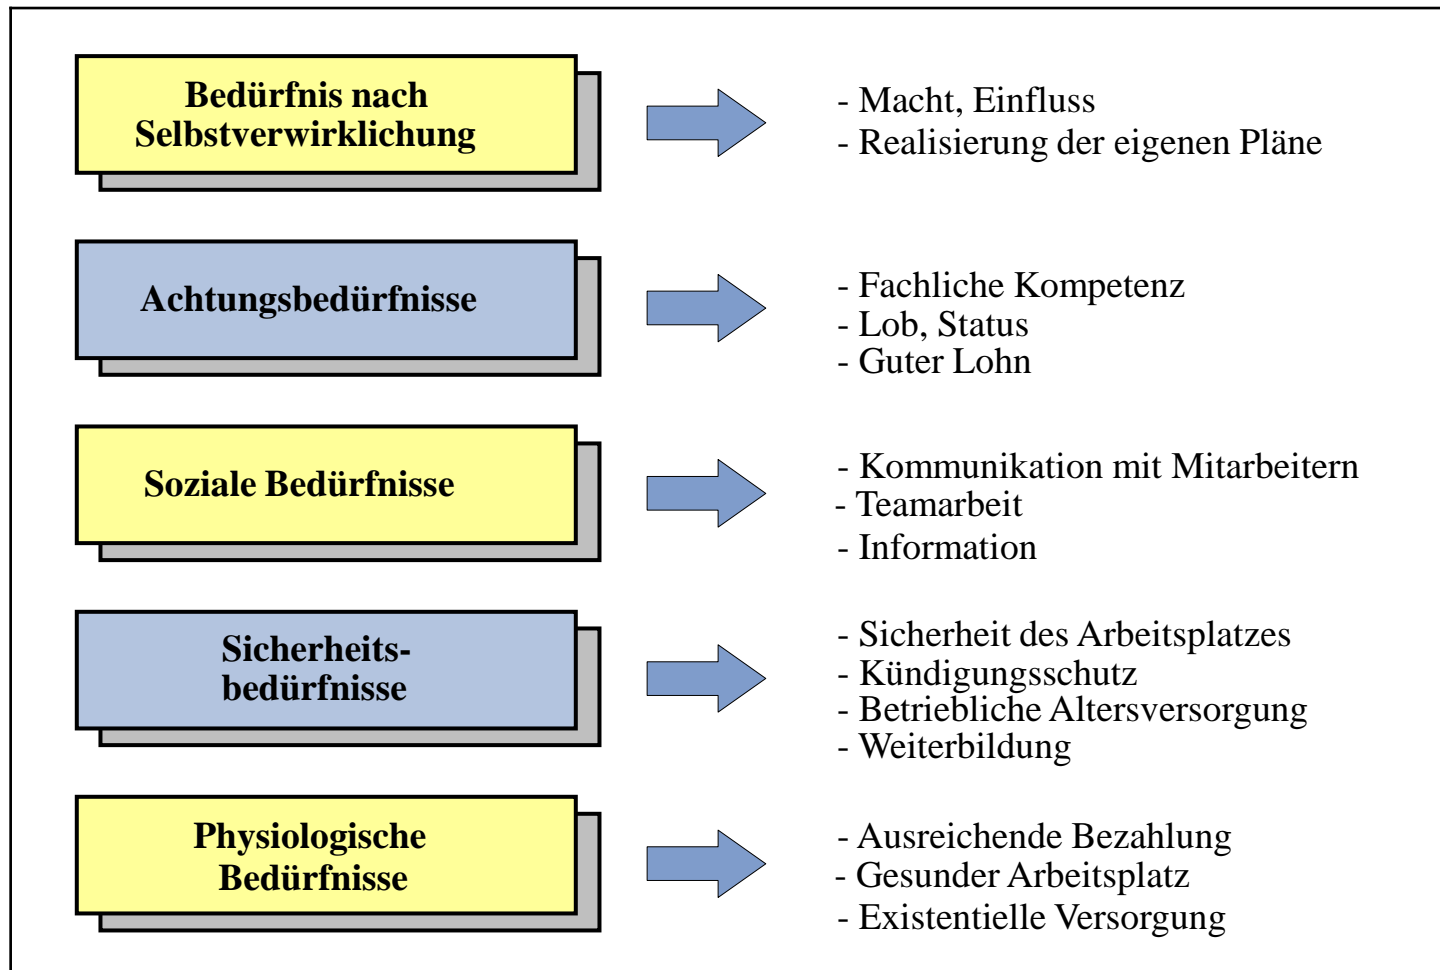

S. 384 Abb. 7

## Dynamische Betrachtung der Bedürfnisstufen

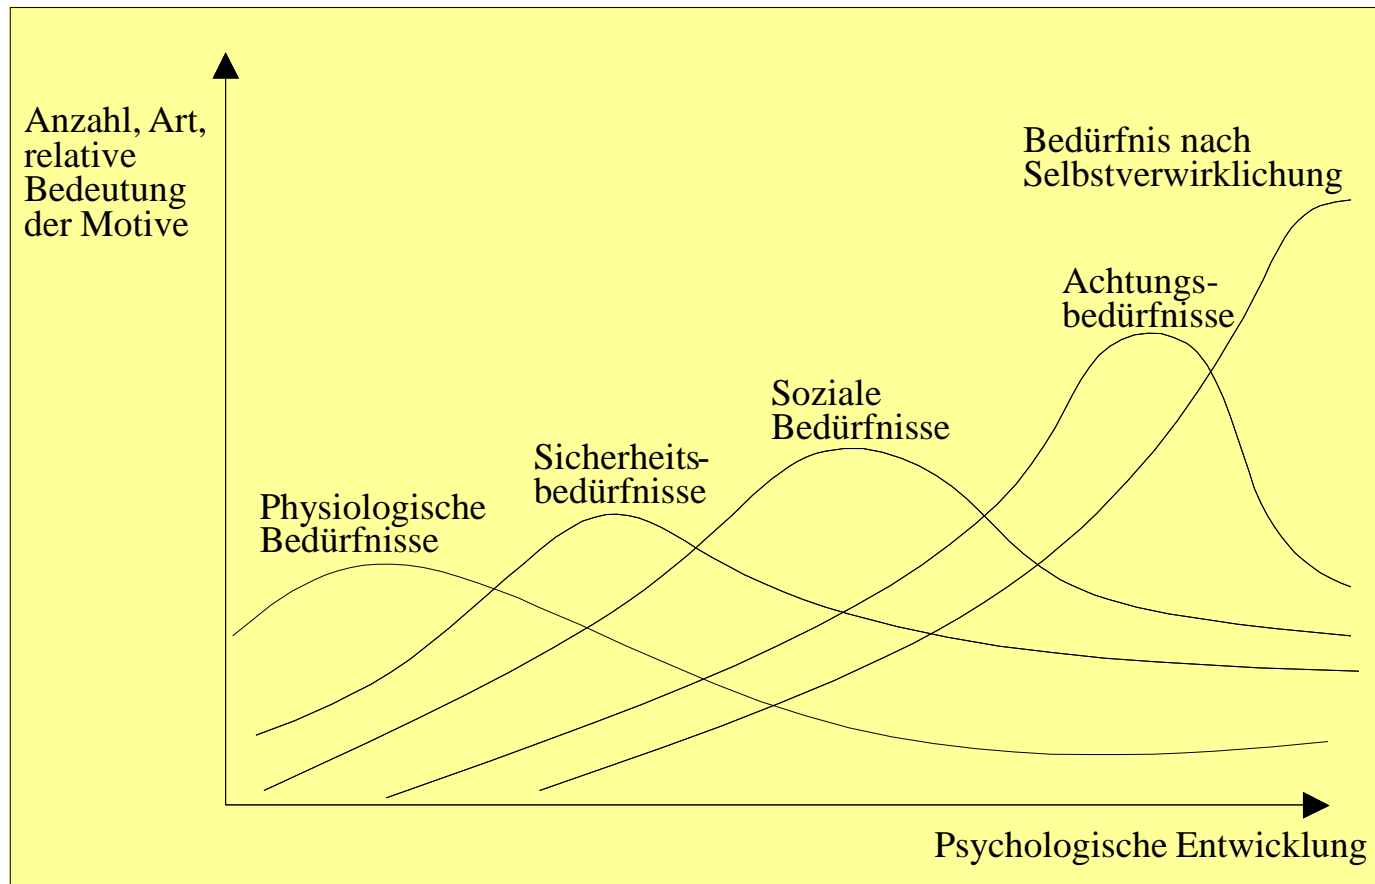

S. 386 Abb. 8

Jung, Hans: Personalwirtschaft, 9. Aufl., München 2010.

© Oldenbourg Wissenschaftsverlag



## Die E-R-G-Theorie von Alderfer

Die von C.P. Alderfer entwickelte und 1969 veröffentlichte **E-R-G-Theorie** ist eine Weiterentwicklung der maslow'schen Motivationstheorie.

- **Existence needs** (Existenzbedürfnisse)
- **Relatedness needs** (Soziale Bedürfnisse)
- **Growth needs** (Wachstums- und Selbstverwirklichungsbedürfnisse)



Gliederung der Bedürfnisse nach Alderfer und nach Maslow

| Gliederung nach Maslow     | Überlappungsbereich            | Gliederung nach Alderfer |
|----------------------------|--------------------------------|--------------------------|
| Physiologische Bedürfnisse | Physiologische Bedürfnisse     | Existenzbedürfnisse      |
| Sicherheit                 | materielle Sicherheit          |                          |
| Zugehörigkeit              | Zwischenmenschliche Sicherheit | Beziehungsbedürfnisse    |
| Wertschätzung              | Liebe                          |                          |
|                            | Schätzung durch andere         | Wachstumsbedürfnisse     |
|                            | Selbstwertgefühl               |                          |
| Selbstverwirklichung       | Selbstverwirklichung           |                          |

S. 387 Abb. 9

## Das Motivmodell nach Adlerfer

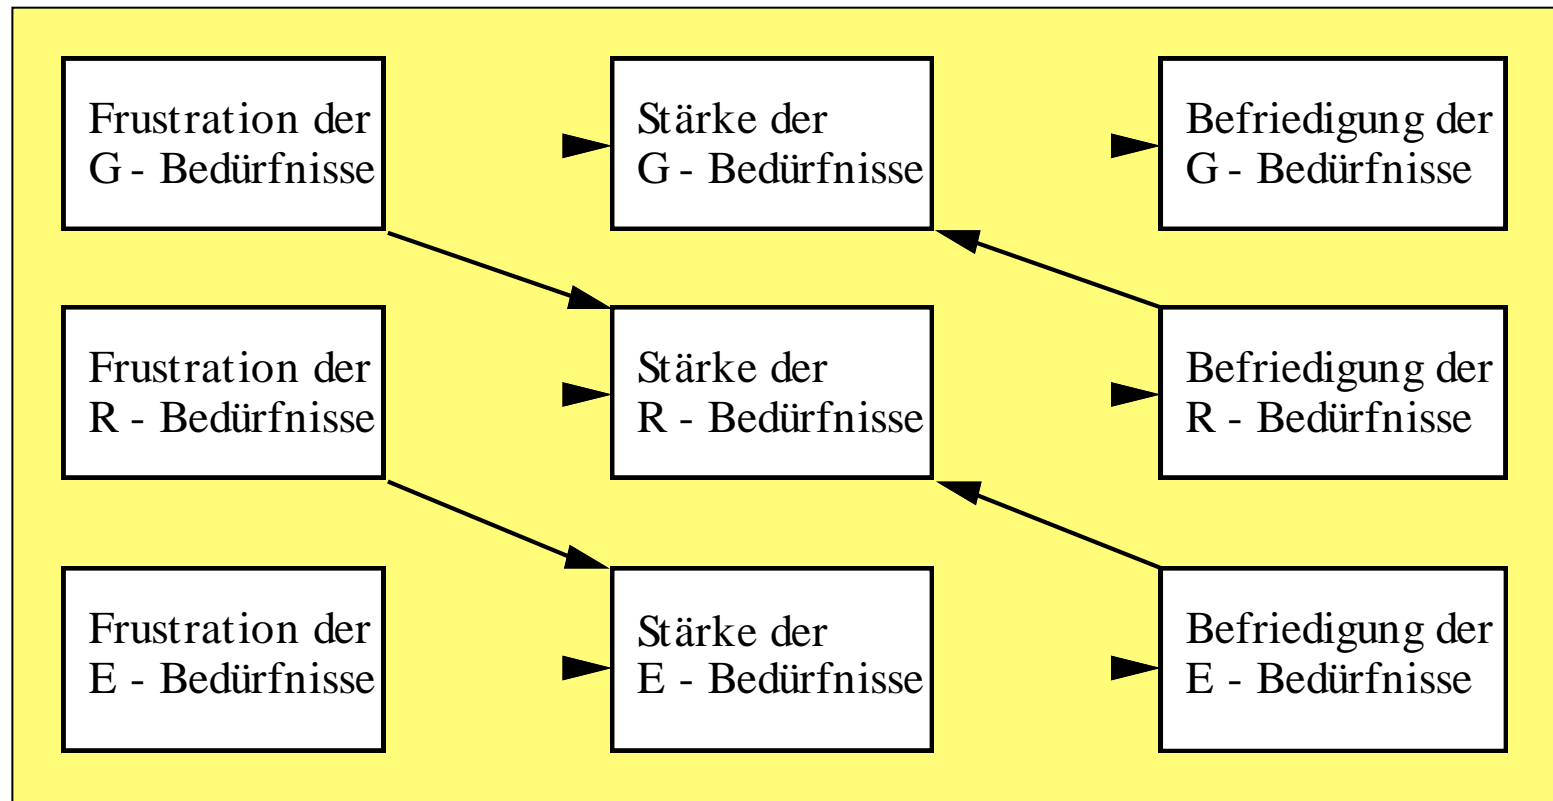

S. 388 Abb. 10  
(in Anlehnung an: Weinert, A. B.: Organisationspsychologie, 3. Auflage, München 1992 S. 267)

Jung, Hans: Personalwirtschaft, 9. Aufl., München 2010.

© Oldenbourg Wissenschaftsverlag



Hygienefaktoren - Motivatoren

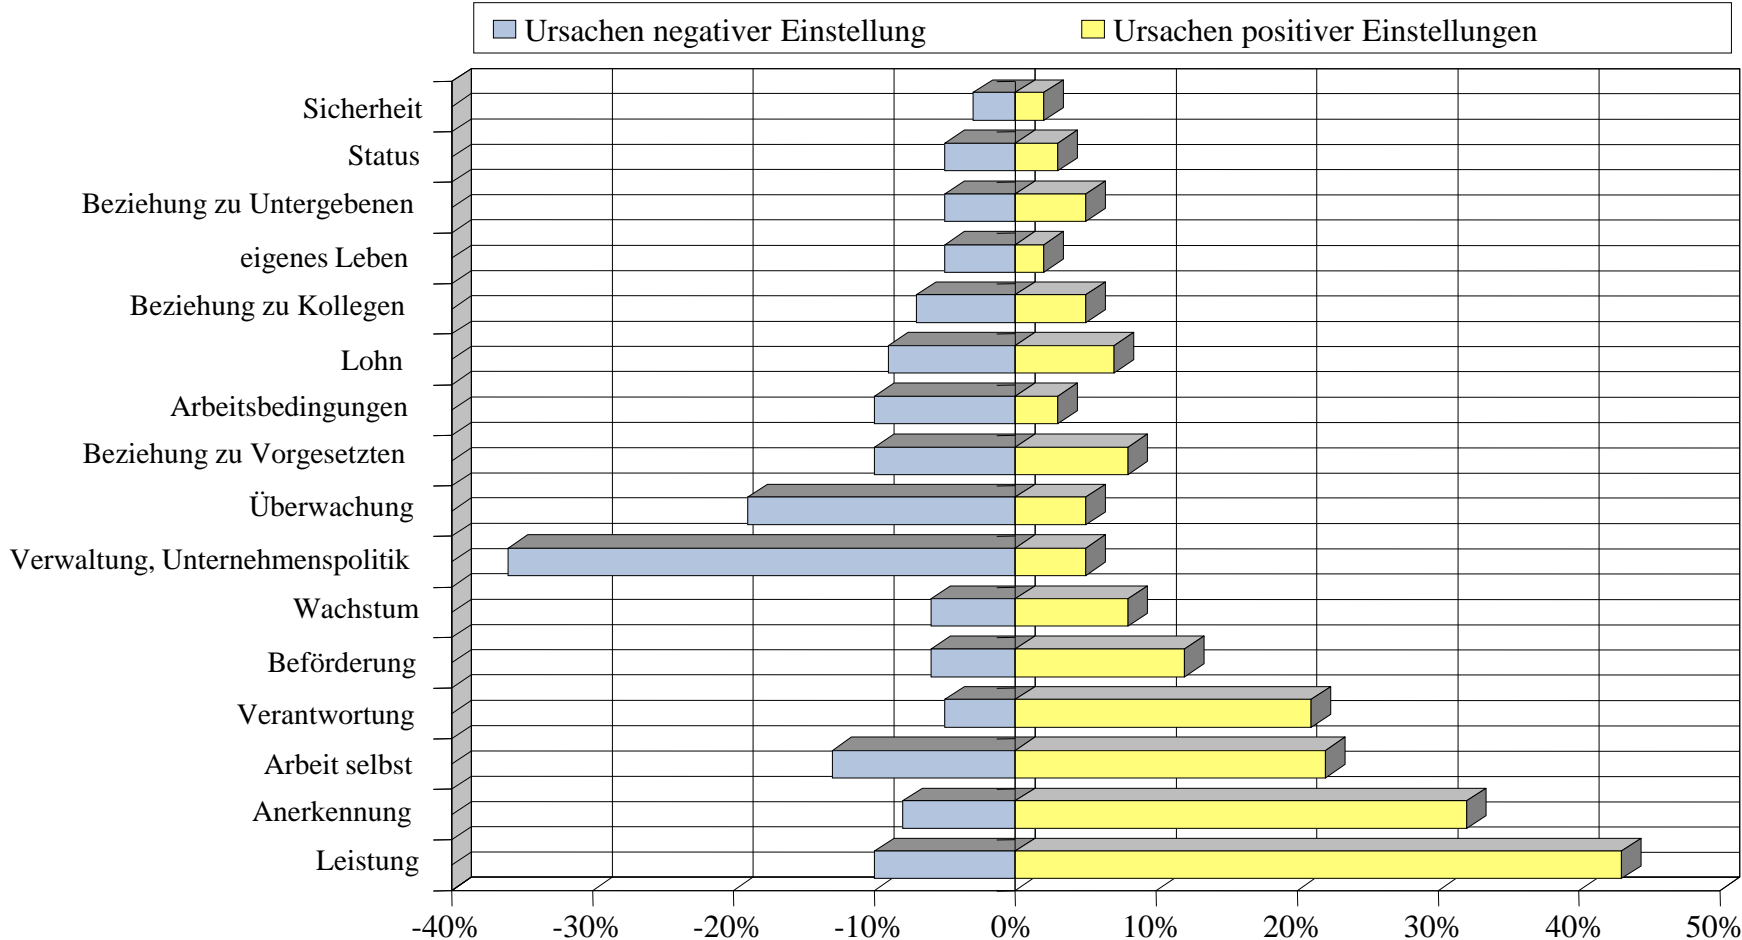

S. 390 Abb. 11  
(in Anlehnung an: Harlander, N. u.a.: Lehrbuch der Personalwirtschaft, 2. Aufl., Landsberg am Lech 1991, S. 54.)

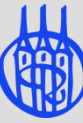

## Die Zwei-Faktoren-Theorie von Herzberg

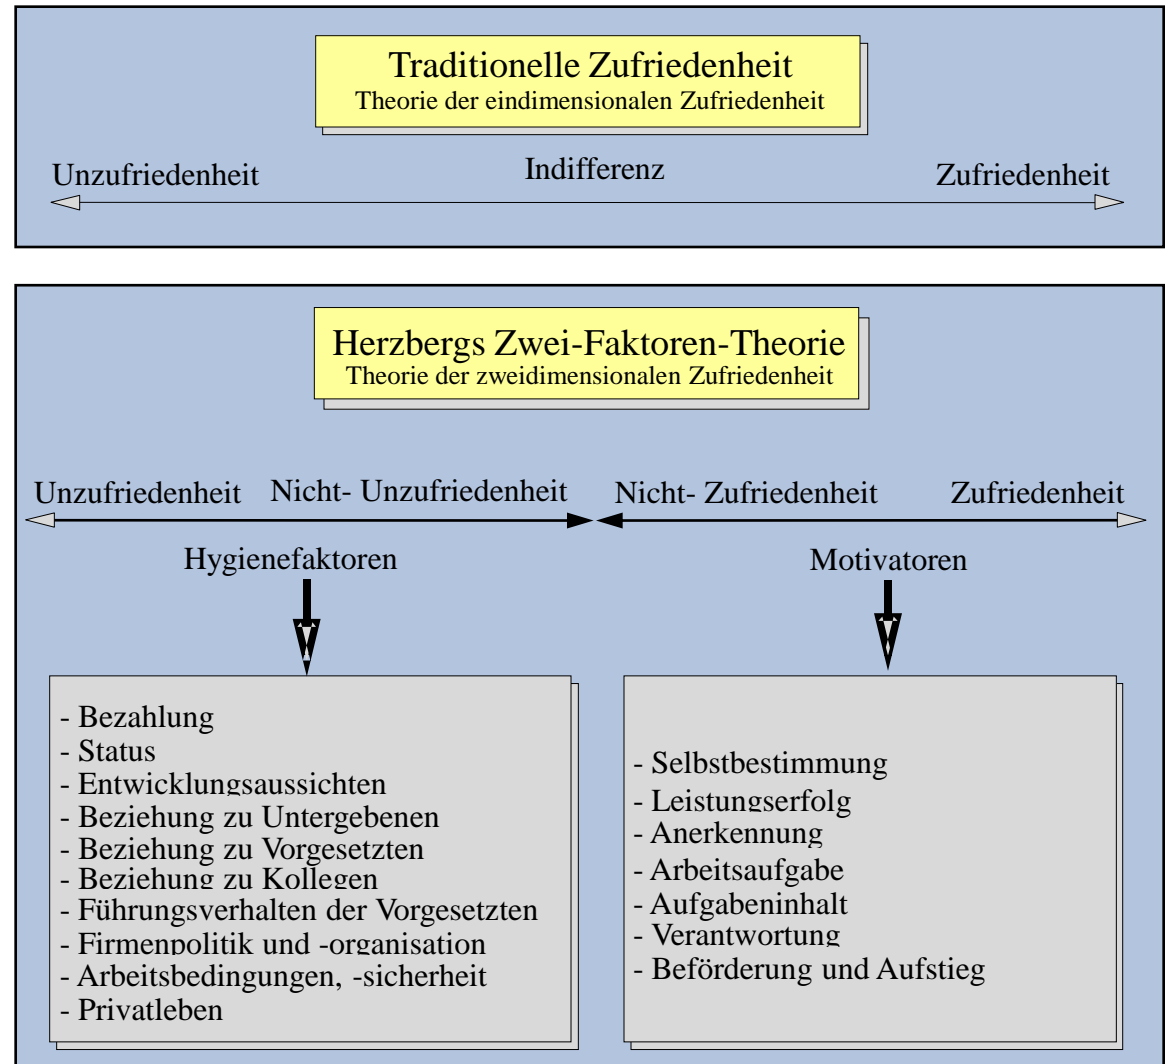

S. 391 Abb. 12





| Prinzip einer vertikalen Aufgabenerweiterung (job enrichment)                                                                                                                                                                                                                                                                                                                                                                                                                                                                                                                                                                                                                                                                            |                                                                                                                                                                                                                                                                                                                                                       |
|------------------------------------------------------------------------------------------------------------------------------------------------------------------------------------------------------------------------------------------------------------------------------------------------------------------------------------------------------------------------------------------------------------------------------------------------------------------------------------------------------------------------------------------------------------------------------------------------------------------------------------------------------------------------------------------------------------------------------------------|-------------------------------------------------------------------------------------------------------------------------------------------------------------------------------------------------------------------------------------------------------------------------------------------------------------------------------------------------------|
| Prinzip                                                                                                                                                                                                                                                                                                                                                                                                                                                                                                                                                                                                                                                                                                                                  | Angesprochene Motivatoren                                                                                                                                                                                                                                                                                                                             |
| <ul style="list-style-type: none"><li>• Abbau einiger Kontrollen unter Beibehaltung der Verantwortlichkeit</li><li>• Gesteigerte Verantwortlichkeit der Mitarbeiter für ihre Arbeit</li><li>• Zuteilung einer vollständigen ursprünglichen Arbeitseinheit (Funktionsbereich, Abteilung, Gebiet etc.)</li><li>• Mehr Befugnisse und mehr Unabhängigkeit für einzelne Mitarbeiter im Rahmen ihrer Tätigkeit</li><li>• Periodische Berichte den Mitarbeitern direkt zugänglich machen, nicht nur den Vorgesetzten</li><li>• Einführung neuer und schwieriger Aufgaben, die vorher nicht zu bewältigen waren</li><li>• Vergabe von genau definierten bzw. Sonder-aufgaben an Einzelne, um ihnen zu ermöglichen, Experten zu werden</li></ul> | <ul style="list-style-type: none"><li>• Verantwortung und persönliche Leistung</li><li>• Verantwortung und Anerkennung</li><li>• Verantwortung, Leistung und Anerkennung</li><li>• Verantwortung, Leistung und Anerkennung</li><li>• Interne Anerkennung</li><li>• Entwicklung und Lernen</li><li>• Verantwortung, Entwicklung und Aufstieg</li></ul> |

S. 392 Abb. 13  
(in Anlehnung an: Herzberg, F.: Was Mitarbeiter wirklich in Schwung bringt. in: Harvard Manager: Führung und Organisation, Bd. 3, Lübeck, S. 67 ff.)



## Die Theorie der gelernten Bedürfnisse nach Mc Clelland

D.C. Mc Clelland unterscheidet in seiner Motivationstheorie drei „Schlüsselbedürfnisse“:

- Achieviement oder Leistungsbedürfnis
- Affililiation oder Angliederungsbedürfnis
- Power oder Machtbedürfnis

Die Neigung zur Bedürfnisbefriedigung (tendency) ist dabei abhängig von der Stärke der Anregung (motivate), der subjektiven Wahrscheinlichkeit eines Erfolges (probability) und dem Attraktivitätswert oder der Verlockung (incentive) eines Erfolges.

Das resultierende Arbeitsverhalten fällt stets subjektiv aus. Daher ergibt sich folgender Zusammenhang:

$$T_s = M_s \cdot P_s \cdot I_s$$

## Der Regelkreis des Faktors Leistung

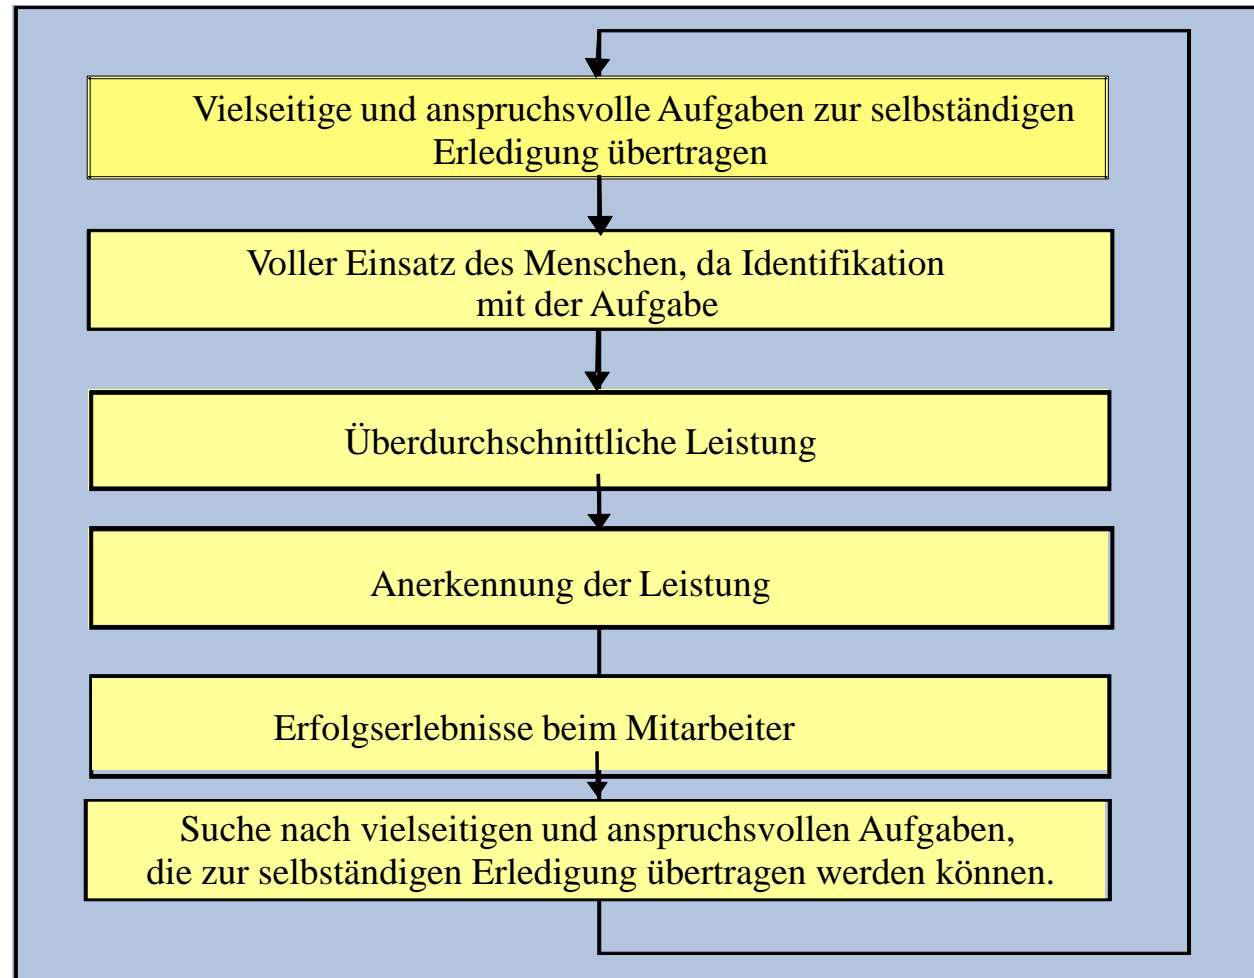

S. 394 Abb. 14



## Die X-Y-Theorie von Mc Gregor

### Das Menschenbild nach der Theorie X

1. Der Durchschnittsmensch hat eine angeborene Abneigung gegen Arbeit und versucht, ihr aus dem Weg zu gehen, wo er nur kann.
2. Weil der Mensch durch Arbeitsunlust gekennzeichnet ist, muss er zumeist gezwungen werden, gelenkt, geführt und mit Strafe bedroht zu werden, um ihn mit Nachdruck dazu zu bewegen, das vom Unternehmen gesetzte Soll zu erreichen.
3. Der Durchschnittsmensch zieht es vor, an die Hand genommen zu werden. Er möchte sich vor Verantwortung drücken, besitzt verhältnismäßig wenig Ehrgeiz und ist vor allem auf Sicherheit bedacht.

S. 395 Abb. 15

Quelle: Vgl. Mc Gregor, D.: Der Mensch im Unternehmen, Düsseldorf/Wien 1970, S. 47 ff.

Jung, Hans: Personalwirtschaft, 9. Aufl., München 2010.

© Oldenbourg Wissenschaftsverlag

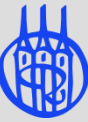

### **Das Menschenbild nach der Theorie Y**

1. Die Verausgabung durch körperliche und geistige Anstrengung beim Arbeiten kann als ebenso natürlich gelten wie Spiel oder Ruhe.
2. Von anderen überwacht und mit Strafe bedroht werden, ist nicht das einzige Mittel, jemanden zu bewegen, sich für die Ziele des Unternehmens einzusetzen. Zugunsten von Zielen, denen er sich verpflichtet fühlt, wird sich der Mensch der Selbstdisziplin und Selbstkontrolle unterwerfen.
3. Wie sehr er sich Zielen verpflichtet fühlt, ist eine Funktion der Belohnungen, die mit ihrem Erreichen verbunden sind.
4. Der Durchschnittsmensch lernt, unter geeigneten Bedingungen Verantwortung nicht nur zu übernehmen, sondern sogar zu suchen.
5. Die Anlage zu einem verhältnismäßig hohen Grad von Vorstellungskraft, Urteilsvermögen und Erfindungsgabe für die Lösung organisatorischer Probleme ist in der Bevölkerung weit verbreitet und nicht nur hier und da anzutreffen.
6. Unter den Bedingungen des modernen industriellen Lebens ist das Vermögen an Verstandeskraften, über das der Durchschnittsmensch verfügt, nur zum Teil genutzt.

S. 396 Abb. 16

(in Anlehnung an: Mc Gregor, D.: Der Mensch im Unternehmen, Düsseldorf/Wien 1970 , S. 61 ff.)

**Jung, Hans: Personalwirtschaft, 9. Aufl., München 2010.**

© Oldenbourg Wissenschaftsverlag



## Führungshandeln nach der Theorie Y

Die **Theorie Y** stellt, ausgehend von den autonomen Antrieben der Mitarbeiter, nicht die Anpassung des Menschen an die Arbeit dar, sondern strebt die Umgestaltung der Organisation, des Aufgabenbereiches und des Arbeitsplatzes unter Berücksichtigung der Bedürfnisse des Einzelnen an.

Mit der Theorie Y sollen die höheren Bedürfnisse des Menschen angesprochen werden.

| Führungshandeln                    | Befriedigung des Bedürfnisses durch |
|------------------------------------|-------------------------------------|
| Beachtung kontaktbewusster Führung | Selbstbeachtung                     |
| Etwas Zutrauen und Selbstkontrolle | Vertrauenswürdigkeit                |
| Behandlung ohne Statusautorität    | Menschliche Gleichwertigkeit        |
| Anhören, Fragen                    | Mitdenken                           |
| Gruppenarbeit                      | Zusammenarbeit                      |
| Selbständige Arbeit                | Selbstverantwortlichkeit            |

S. 396 Abb. 17



## Erwartungsalienztheorien

- Der Path-Goal-Ansatz von Georgopoulos, Mahoney und Jones
- Die VIE-Theorie von Vromm
- Die Zirkulationstheorie von Porter und Lawler



## Bestimmungsfaktoren der VIE-Theorie

### V= die **Valenz**

ist die subjektive Belohnung, die mit der Zielerreichung verbunden ist. Sie wird bestimmt durch die Motive des Mitarbeiters und den Anreiz, der von einer Leistung ausgeht.

### I = die **Instrumentalität**

gibt an, inwieweit eine bestimmte Handlung und deren Ergebnis von dem Mitarbeiter als ein geeignetes Mittel (Instrument) zur Zielerreichung, d.h. zur Erlangung des angestrebten Anreizes, gehalten wird.

### E = die **Erwartung**

stellt die subjektive Einschätzung der Wahrscheinlichkeit des Mitarbeiters dar, mit der eine bestimmte Handlung auch zu einem erfolgreichen Ergebnis führt.

S. 398 Abb. 18

(in Anlehnung an: Vroom, V. H.: Work and Motivation, New York/London/Sydney 1964.)

Jung, Hans: Personalwirtschaft, 9. Aufl., München 2010.

© Oldenbourg Wissenschaftsverlag



## Bestimmungsfaktoren der Motivation

- Der Path-Goal-Ansatz von Georgopoulos, Mahoney und Jones
- Die VIE-Theorie von Vroom
- Die Zirkulationstheorie von Porter und Lawler

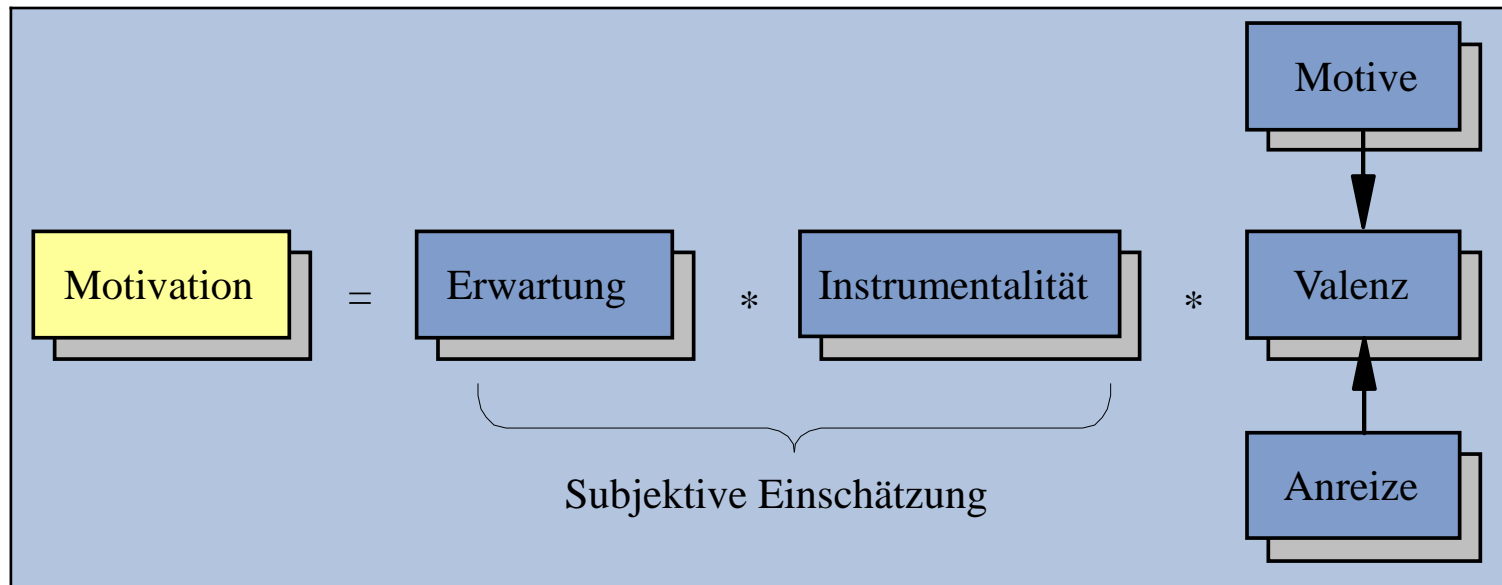

S. 399 Abb. 19

Jung, Hans: Personalwirtschaft, 9. Aufl., München 2010.

© Oldenbourg Wissenschaftsverlag

## Der Auswahlprozess

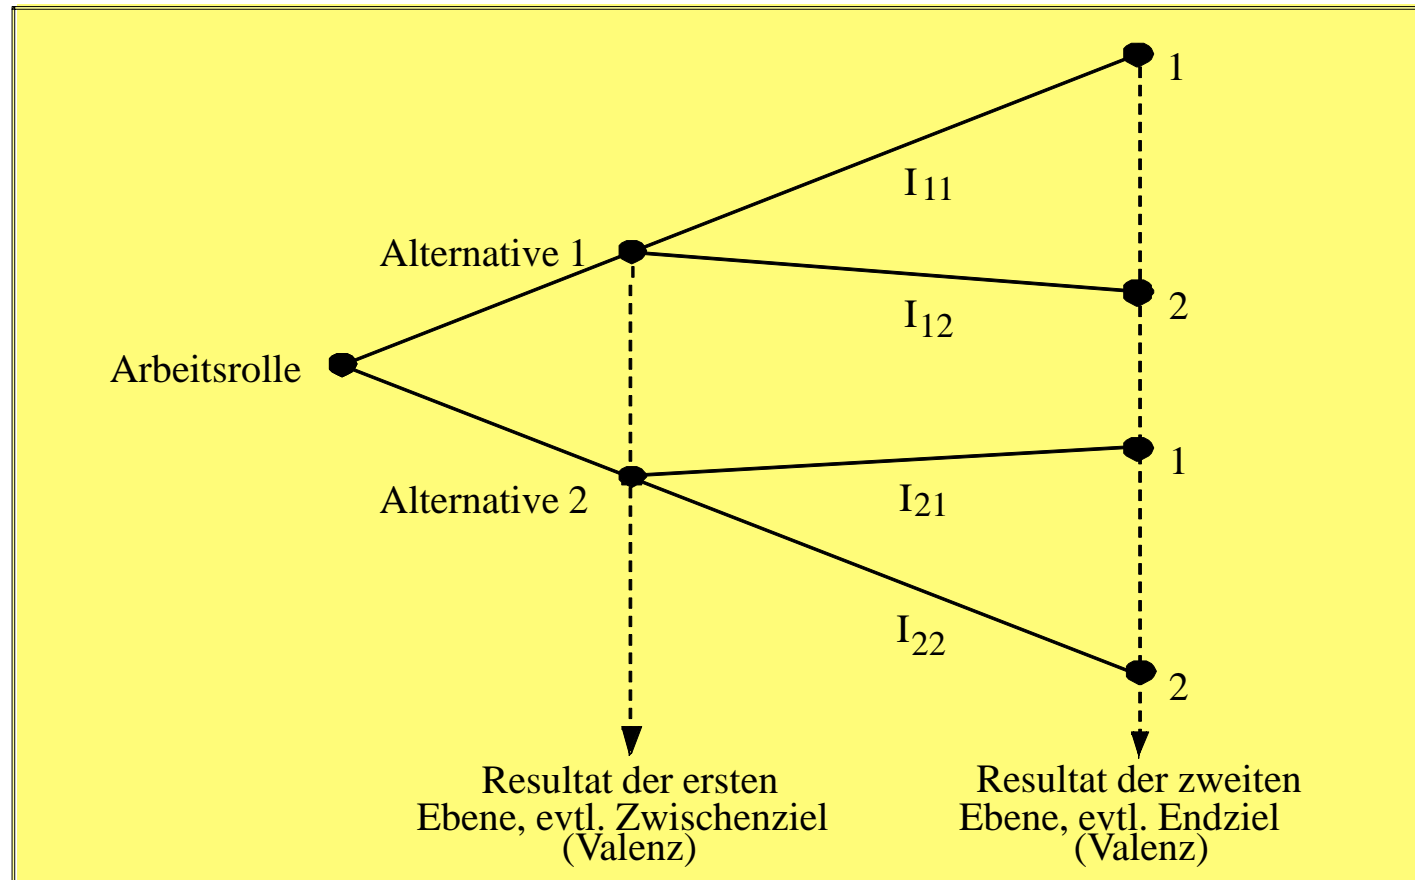

S. 399 Abb. 19

hierzu auch Weinert, A. B.: Organisationspsychologie, 3. Auflage, München 1992 S. 274 ff.

Jung, Hans: Personalwirtschaft, 9. Aufl., München 2010.

© Oldenbourg Wissenschaftsverlag



Einflussgrößen im Erwartungsvalenzmodell nach Porter und Lawler

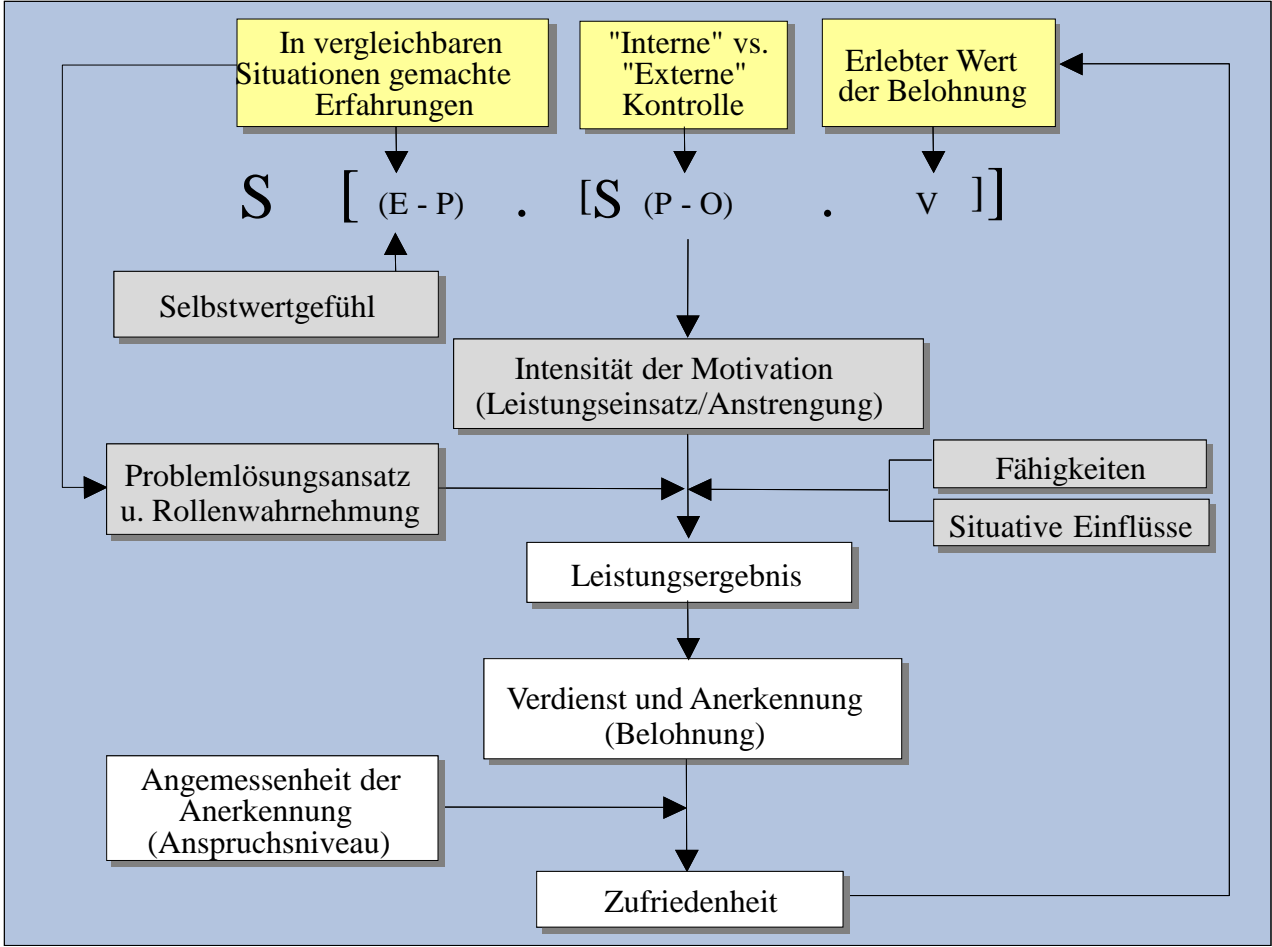

S. 402 Abb. 21



## Gleichgewichtstheorien

Gleichgewichtstheorien gehen von dem Homöostase-Konzept aus, welches besagt, dass der menschliche Organismus im physiologischen, im kognitiven und im sozialen Bereich grundsätzlich Gleichgewichtszustände anstrebt.

So führen beispielsweise als Durst erlebte Gewebespannungen zur Aufnahme von Flüssigkeit oder eine als zu niedrig empfundene Entlohnung (d.h. ein Ungleichgewicht von Leistung und Gegenleistung) zur Senkung eigener Leistungen.

- Die Balance-Theorie von Adams
- Die Anreiz-Beitrags-Theorie von March und Simons



## Die Balance-Theorie von Adams

**Annahme: Soziale Beziehungen werden mit wirtschaftlichen Tauschaktionen verglichen.**

In Bezug auf die Arbeitssituation im Unternehmen erwartet ein Mitarbeiter entsprechend seinem Arbeitseinsatz, seiner Leistung und seiner Erfahrung eine Gegenleistung in Form von Bezahlung, Beförderung, sozialer Sicherheit etc.

Die Arbeitszufriedenheit des Mitarbeiters ist nur so lange gewährleistet, wie er das subjektiv empfundene "Einsatz-Belohnungsverhältnis" im Gleichgewicht sieht.



## Die Anreiz-Beitrags-Theorie von March und Simons

**Annahme:** Die Mitglieder einer Organisation bewerten ihre von der Organisation erhaltenen Anreize in Bezug auf die Beiträge, die sie wiederum selbst an die Organisation leisten.

Wendet man diese Theorie auf die Situation in einem Unternehmen an, dann bestimmt das Ergebnis des oben genannten Bewertungsvorganges nicht nur das Verhalten des einzelnen Mitarbeiters im Unternehmen, sondern es ist auch ausschlaggebend für Entscheidungen wie das Verlassen eines Unternehmens (Kündigung) oder die Frage, ob überhaupt in das Unternehmen eingetreten wird.

## Vereinfachte Darstellung der Einflussgrößen für rollenkonformes Verhalten

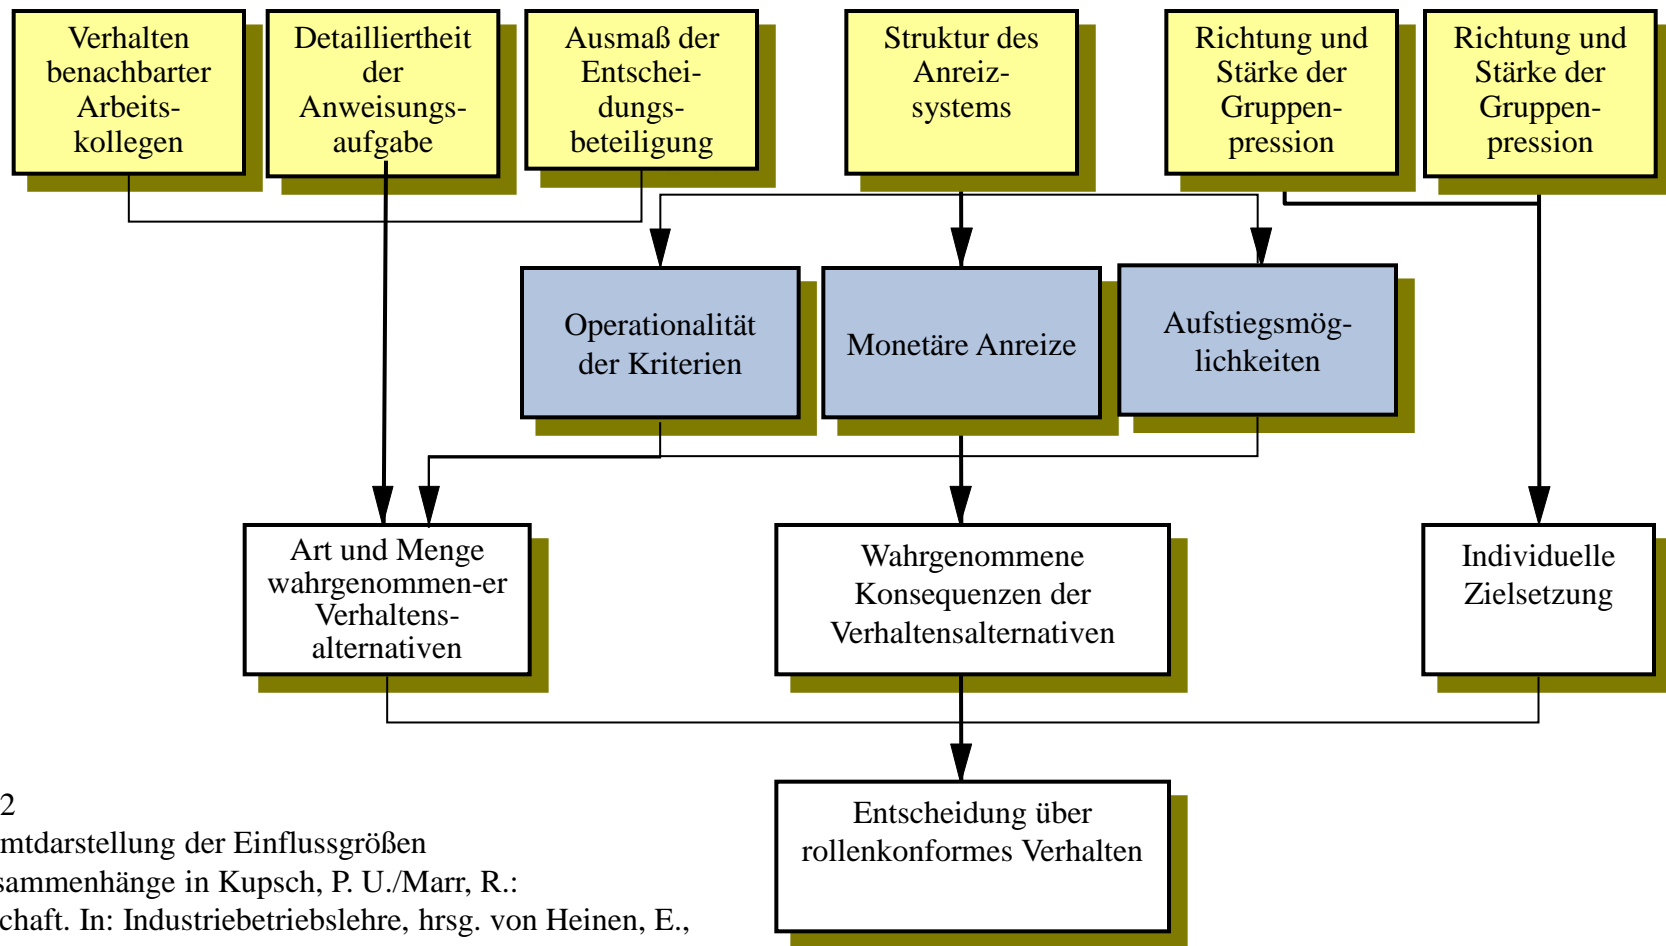

S. 404 Abb. 22  
Vgl. die Gesamtdarstellung der Einflussgrößen  
und ihrer Zusammenhänge in Kupsch, P. U./Marr, R.:  
Personalwirtschaft. In: Industriebetriebslehre, hrsg. von Heinen, E.,  
9. Aufl., Wiesbaden 1991, S. 750 ff.



Wirkungsdauer von Motivationsmitteln

| Wirkungsdauer Angaben in % <input type="checkbox"/> eher lang <input type="checkbox"/> eher kurz |    |    |
|--------------------------------------------------------------------------------------------------|----|----|
| Persönliche Entfaltungsmöglichkeit                                                               | 92 | 8  |
| Soziale Absicherung                                                                              | 86 | 14 |
| Aufstieg                                                                                         | 85 | 15 |
| Identifikation                                                                                   | 79 | 21 |
| Vorbild                                                                                          | 78 | 22 |
| Arbeitsbedingungen                                                                               | 76 | 24 |
| Partizipation                                                                                    | 74 | 26 |
| Delegation                                                                                       | 72 | 28 |
| Weiterbildung                                                                                    | 67 | 33 |
| Information                                                                                      | 57 | 43 |
| Anerkennung                                                                                      | 48 | 52 |
| Statussymbol                                                                                     | 44 | 56 |
| Bezahlung                                                                                        | 37 | 63 |

S. 406 Abb. 23  
(in Anlehnung an: Harlander, N.: So motiviere ich meine Mitarbeiter, Köln 1989, S. 110)





Betriebsklima

Die Stimmung, die in einem Betrieb herrscht, spiegelt sich im Betriebsklima wieder. Jeder Betriebsangehörige trägt seinen Anteil im negativen sowie im positiven Sinn zum Betriebsklima bei.

Entscheidend ist, dass durch das Betriebsklima die Motivation und damit das Leistungsvermögen der Mitarbeiter stark beeinflusst wird.

| Faktoren für ein schlechtes Betriebsklima                                                                                                                                                                  | Faktoren für ein gutes Betriebsklima                                                                                                                                                                                                       |
|------------------------------------------------------------------------------------------------------------------------------------------------------------------------------------------------------------|--------------------------------------------------------------------------------------------------------------------------------------------------------------------------------------------------------------------------------------------|
| <ul style="list-style-type: none"><li>• Intrigen</li><li>• Kollegenneid</li><li>• Fehlende Anerkennung</li><li>• Missgelaunter Chef</li><li>• Ungerechte Entlohnung</li><li>• Hohe Krankenstände</li></ul> | <ul style="list-style-type: none"><li>• Teamgeist</li><li>• Selbständiges Arbeiten</li><li>• Anerkennung durch den Chef</li><li>• Kooperation der Kollegen</li><li>• Gerechte Aufteilung der Arbeit</li><li>• Unternehmenserfolg</li></ul> |

S. 407 Abb. 24



## Mobbing

- Angriffe auf die Mitteilungsmöglichkeiten der Mitarbeiter
- Angriffe auf die sozialen Beziehungen der Belegschaft
- Attacken auf das soziale Ansehen einer Persönlichkeit
- Beschränkungen der Qualität der Berufs- und Lebenssituation
- Angriffe auf die Gesundheit einer Person

## 2. Personalführung

- 2.1 Personalführung als Teil der Unternehmensführung
- 2.2 Führungstheorien und Führungsforschung
- 2.3 Führungsstiltheorie
- 2.4 Der Führungsprozess
- 2.5 Führungsaufgaben
- 2.6 Die Kommunikation im Führungsprozess
- 2.7 Kommunikatives Gruppenmanagement
- 2.8 Führungsprinzipien, -modelle und –grundsätze
- 2.9 Trainingsmethoden für Führungskräfte

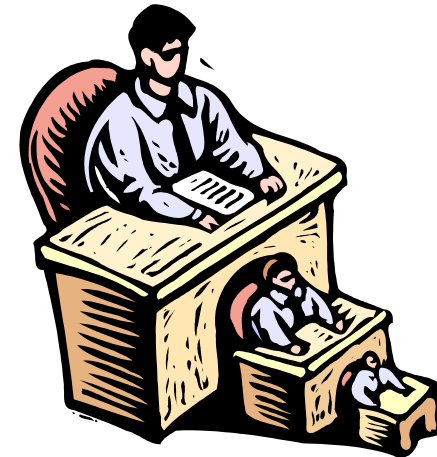



## Personalführung als Teil der Unternehmensführung

Unter Personalführung versteht man allgemein einen **kommunikativen Prozess** der Einflussnahme auf die Mitarbeiter zum Zweck zielgerichteter Leistungserstellung.

**Charakteristisch für die Personalführung sind folgende Merkmale:**

- mindestens zwei Personen sind beteiligt: **Führer** und **Geführter**,
- es findet eine **soziale Interaktion** statt,
- die Führung erfolgt **zielorientiert**; bestimmte Ergebnisse sollen erreicht, bestimmte Aufgaben erfüllt werden,
- sie bewirkt eine **Verhaltensauslösung** bzw. **Verhaltenssteuerung**



## Funktionsbereiche

- Zum einen ist die Erfüllung der Sachziele unter Leistungs- und Zeitvorgaben sicherzustellen. Die Mitarbeiter müssen zu kooperativem Handeln auf ein gemeinsames Ziel hin aktiviert und motiviert werden.
  - ➔ Damit steht die **Lokomotionsfunktion** der Führung im Mittelpunkt.
  
- Zum anderen bedeutet Personalführung, dass sowohl für den einzelnen Mitarbeiter als auch für die Gruppe motivierende Arbeitsbedingungen geschaffen werden.
  - ➔ Die **Kohäsionsfunktion** besteht somit darin, Zusammenhalt und Loyalität innerhalb der Gruppe zu fördern.

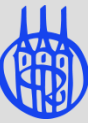

## Macht und Autorität als Führungsvoraussetzungen

Je nach der Position im Hierarchiegefüge eines Unternehmens werden den Stelleninhabern in gewissem Umfang Einflussmöglichkeiten auf das betriebliche Geschehen zugesprochen.

Die Möglichkeit, auf andere Mitarbeiter Einfluss zu nehmen bzw. ihr Verhalten zu lenken und zu kontrollieren (sie zu führen), beruht auf **Macht** und **Autorität**.

### Arten der Macht

- Macht durch Belohnung
- Macht durch Bestrafung
- Macht durch Identifikation    Macht durch Legitimation
- Macht durch Sachkenntnis
- Macht durch Sanktion

## Autorität als Führungsvoraussetzung

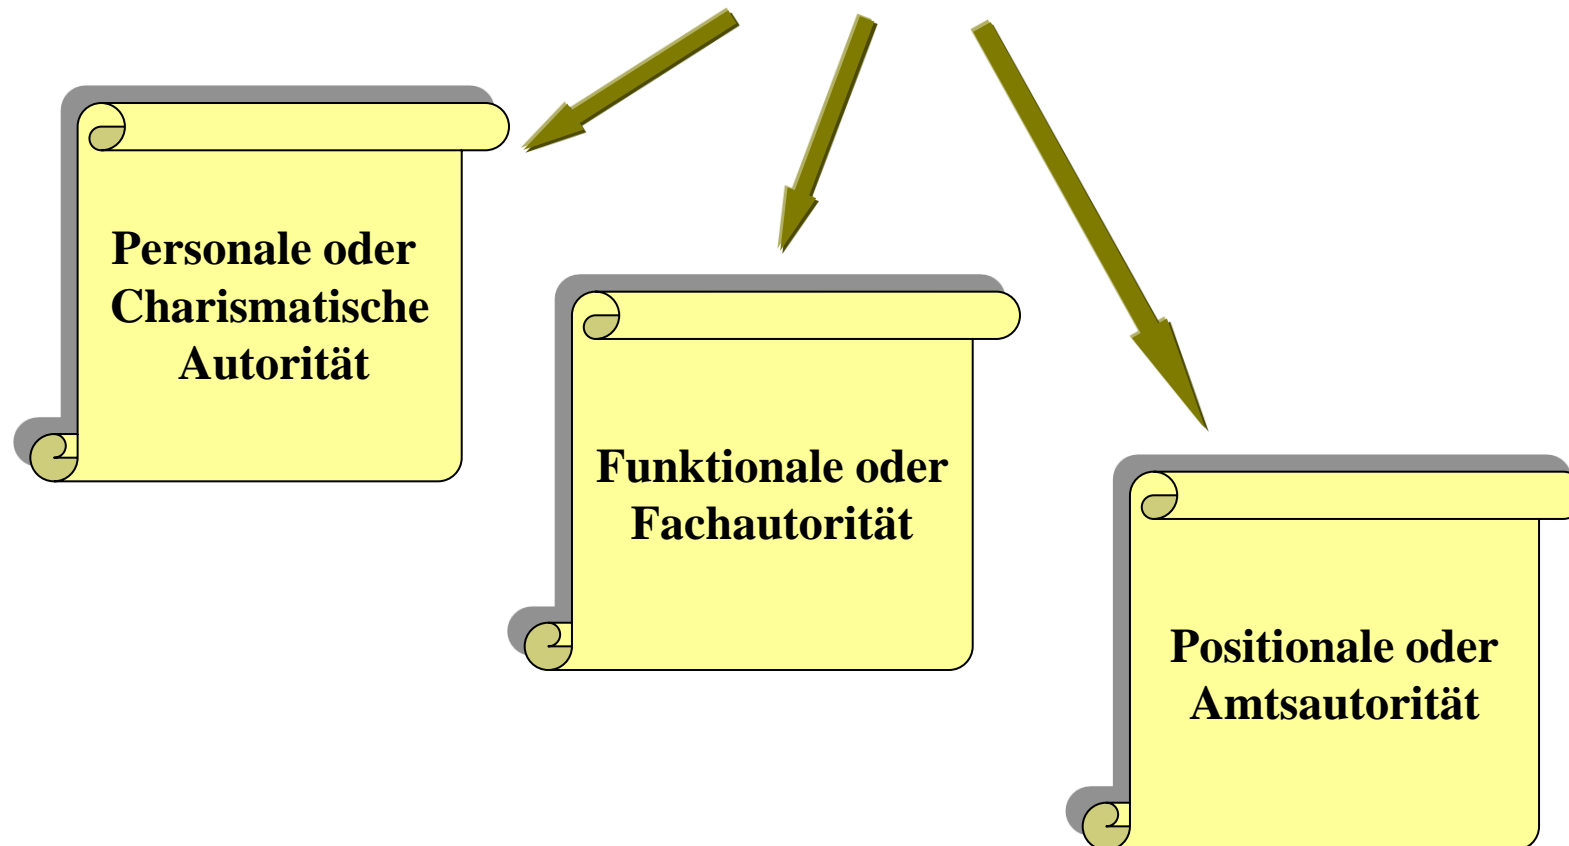



Autoritätsfördernde und autoritätsgefährdende Eigenschaften bzw. Verhaltensweisen

| Autoritätsfördernd                                                                                                                                                                                                                                                                                                                                                                                                                                                                                                            | Autoritätsgefährdend                                                                                                                                                                                                                                                                                                                                                                                                                                                                                                     |
|-------------------------------------------------------------------------------------------------------------------------------------------------------------------------------------------------------------------------------------------------------------------------------------------------------------------------------------------------------------------------------------------------------------------------------------------------------------------------------------------------------------------------------|--------------------------------------------------------------------------------------------------------------------------------------------------------------------------------------------------------------------------------------------------------------------------------------------------------------------------------------------------------------------------------------------------------------------------------------------------------------------------------------------------------------------------|
| <ul style="list-style-type: none"><li>- Rollengemäßes Verhalten</li><li>- Mitarbeiterinteressen nach oben vertreten</li><li>- Angemessene Forderung der Mitarbeiter</li><li>- Zuverlässigkeit</li><li>- Persönlichkeit, Leistung und Zuständigkeit anderer respektieren</li><li>- Klare Anweisungen erteilen</li><li>- Eigene Fehler eingestehen</li><li>- Gerechtigkeit</li><li>- Sachbezogene Kritik üben</li><li>- Qualifizierte Mitarbeiter fördern</li><li>- Toleranz gegenüber anderen Meinungen</li><li>usw.</li></ul> | <ul style="list-style-type: none"><li>- Unkontrolliertes Verhalten</li><li>- Nervosität, Angst</li><li>- Gleichgültigkeit gegenüber Mitarbeiterbelangen</li><li>- Unpünktlichkeit</li><li>- Unloyalität gegenüber Mitarbeitern</li><li>- Ungerechtfertigte und übereilte Kritik</li><li>- Menschen manipulieren</li><li>- Eigene Fehler anderen zuschieben</li><li>- Besserwisserei</li><li>- Unsicherheit und Unentschlossenheit bei drängenden Entscheidungen</li><li>- Rhetorische Unfähigkeit</li><li>usw.</li></ul> |

S. 414 Abb. 25



## Formen der Personalführung

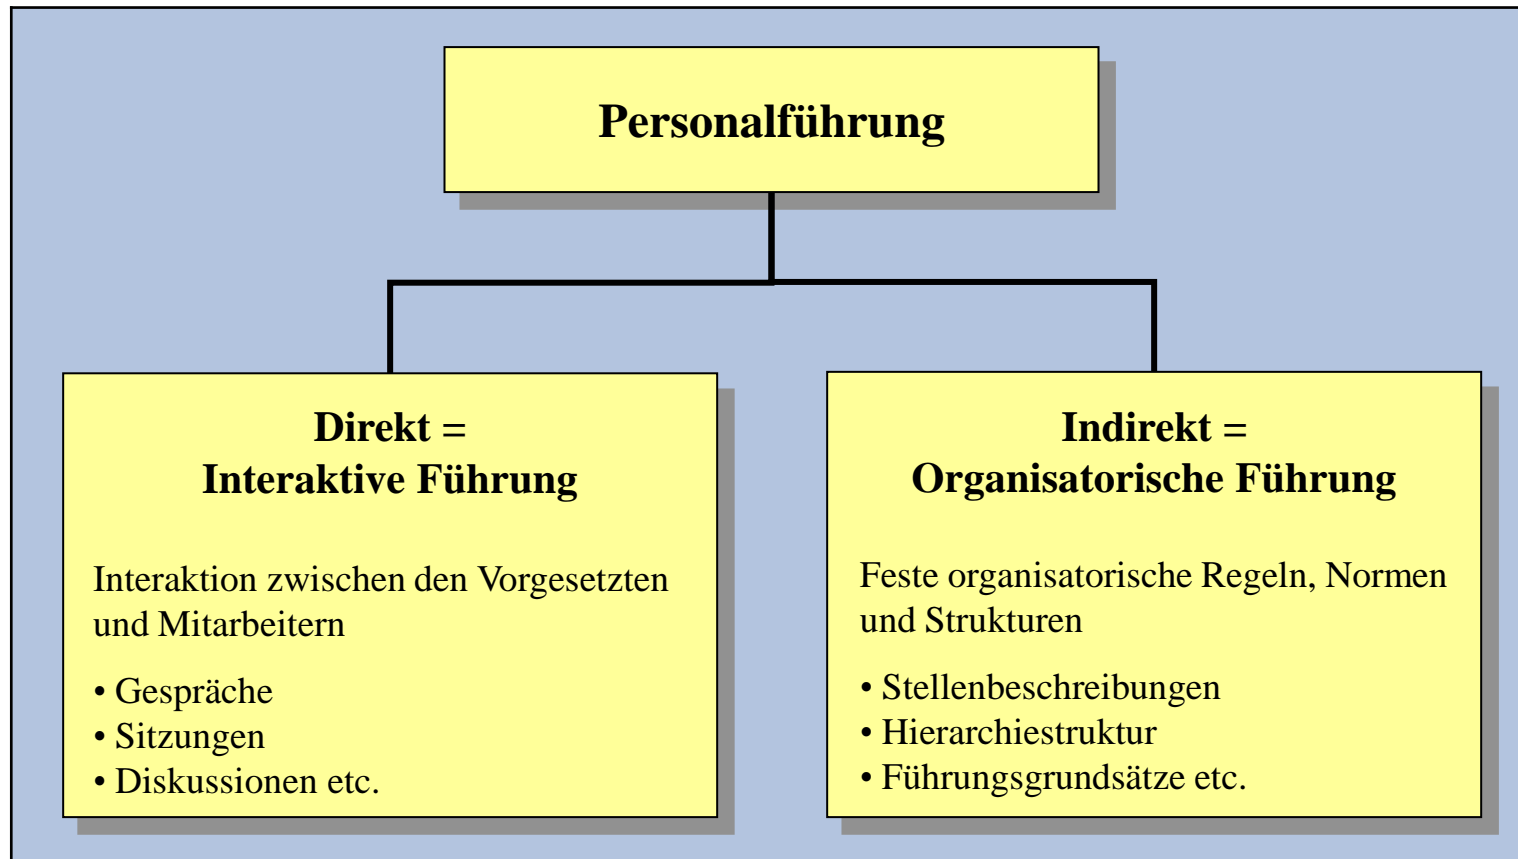

S. 415 Abb. 26

Jung, Hans: Personalwirtschaft, 9. Aufl., München 2010.

© Oldenbourg Wissenschaftsverlag

## Führungstheorien und Führungsforschung

Ziel jeder Personalführung ist der Führungserfolg, der in einer Optimierung der ökonomischen Effizienz (Arbeitsleistung) und der sozialen Effizienz (Arbeitszufriedenheit) besteht.

In den Führungstheorien wird untersucht, welche Einflussfaktoren diesen Führungserfolg im wesentlichen bestimmen.

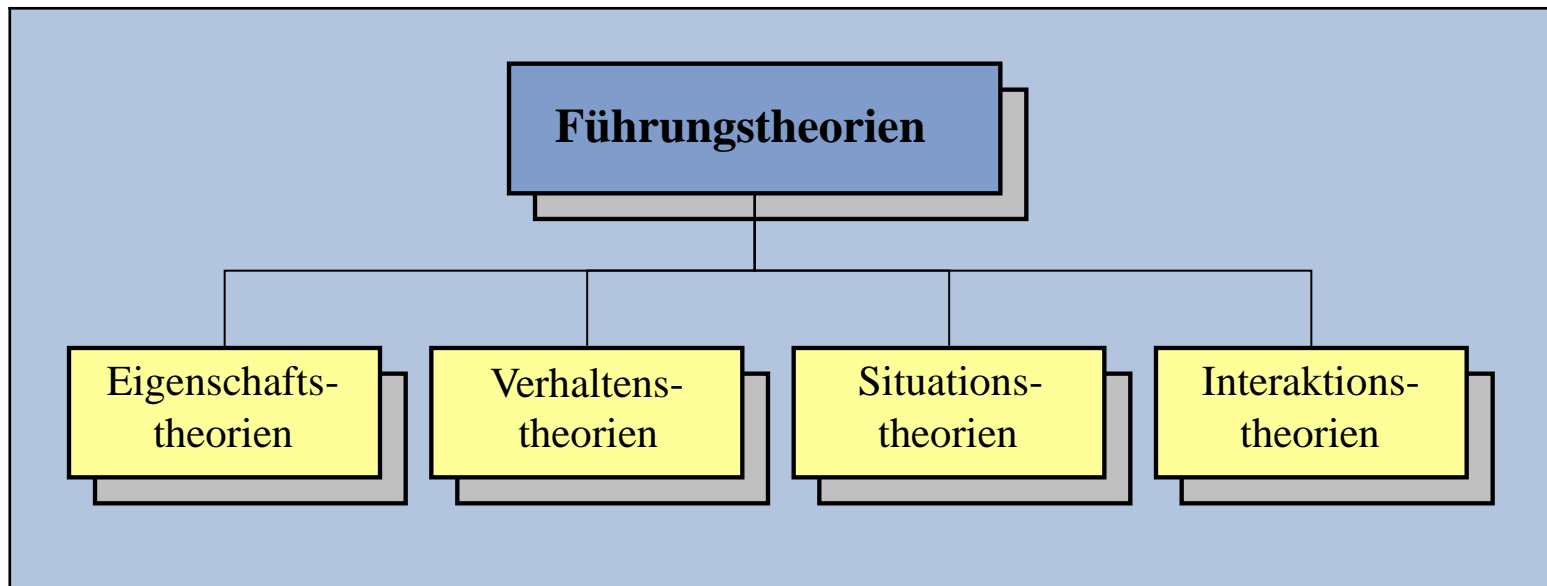

S. 415 Abb. 27



## 1. Eigenschaftstheorien (Trait Approach)

**Intuitiv-introspektiv** gewonnene Eigenschaftskataloge, in denen Eigenschaften wie Selbstvertrauen, Entschlusskraft, Willenskraft, breites Wissen, Überzeugungskraft, Selbstgenügsamkeit und Intelligenz genannt werden.

Unberücksichtigt bleibt bei diesen Untersuchungen die Frage nach den Beziehungen der einzelnen Eigenschaften untereinander, wie z.B.:

Wird durch großes Wissen und hohe Intelligenz die Entschlussfähigkeit gefördert oder behindert.



**Empirisch-statistisch** gewonnene Kataloge, die ausgehend von empirischen Untersuchungen durch Sammeln und Vergleichen versuchen, die Führungseigenschaften zu bestimmen.

Fünf Kriterien nach **Stogdil**, die einen Menschen als Führungspersönlichkeit auszeichnen:

1. **Befähigung:** Intelligenz, Wachsamkeit, sprachliche Gewandtheit, Originalität und Urteilskraft.
2. **Leistung:** Arbeitsleistungen, Wissen, Schulleistungen und sportliche Leistungen.
3. **Verantwortlichkeit:** Zuverlässigkeit, Initiative, Ausdauer, Angriffslust, Selbstvertrauen und der Wunsch, sich auszuzeichnen.
4. **Teilnahme:** Handlungsfreude, Kontaktfähigkeit, Einsatzwille und Anpassungsfähigkeit.
5. **Status:** Soziale und wirtschaftliche Lage, die sozioökonomische Position des Einzelnen.



## 2. Verhaltenstheorien (Behavioral Approach)

Entwicklung der Führungsforschung (Ende der 40er Jahre) von der Suche nach typischen Eigenschaften eines Führers hin zur Frage, wie erfolgreiche Führer sich verhalten.

Das Ergebnis war eine große Anzahl verhaltensorientierter Ansätze zur Klärung folgender Fragen:

- Was haben Vorgesetzte in Führungssituationen eigentlich vor allem zu tun?
- Welche Tätigkeiten von Führungskräften korrelieren am Stärksten mit dem Führungserfolg?
- Welche Verhaltensmaßnahmen können sinnvollerweise über Fortbildungsmaßnahmen entwickelt oder verbessert werden?
- Wie kann die Führungssituation organisiert werden, so dass sie dem tatsächlich gezeigten Verhalten der Führungskräfte besser entspricht?



Eine Unterteilung der verschiedenen verhaltensorientierten Ansätze ist mit Hilfe der Frage möglich, durch wie viele Dimensionen das Führungsverhalten bestimmt wird, d.h. wie viele unabhängige Merkmale einen Führungsstil beschreiben.

Eine Sonderstellung innerhalb der Verhaltenstheorien nehmen die **Gruppentheorien** ein.

### **Gruppentheorien**

Erklärung des Führungserfolges durch das persönliche Verhalten innerhalb von Gruppen oder Teams.

## Der „organisatorische Eisberg“

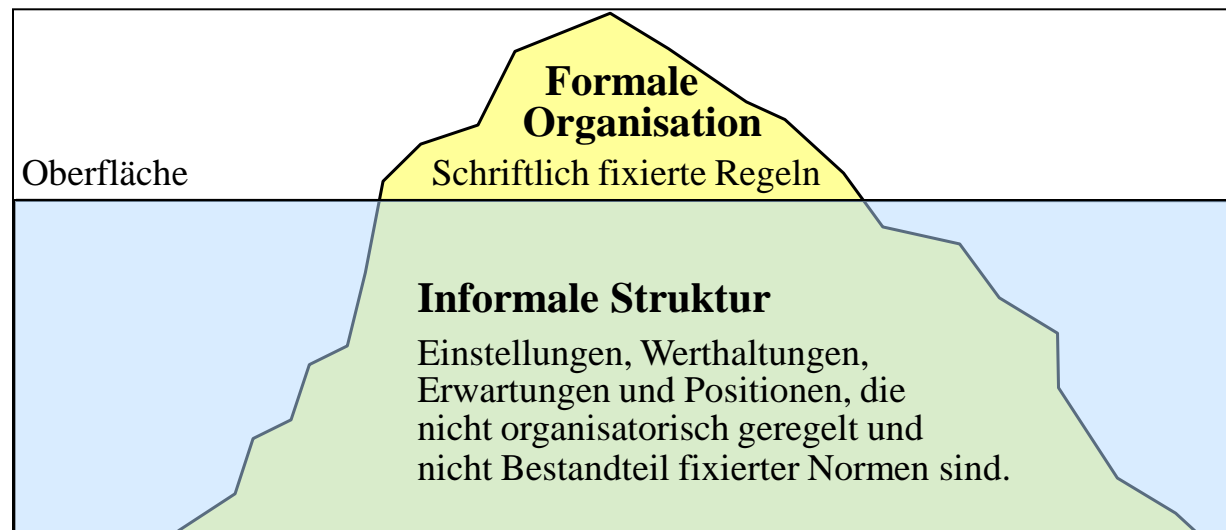

- Die Rolle des informalen Gruppenführers fällt demjenigen Teammitglied zu, das die Bedürfnisse der anderen Teammitglieder am besten befriedigen kann. Die Besetzung dieser auch als "Alpha-Position" bezeichneten Rolle hängt in hohem Maße von den zwischenmenschlichen Beziehungen der Gruppenmitglieder ab.
- Die erfolgreiche Führung einer Gruppe setzt daher einerseits die Kenntnis der formalen und informalen Struktur voraus, andererseits das Bewusstsein des Führers, dass die Erreichung der Sachziele auf der Motivation und der Bedürfniserfüllung der Gruppenmitglieder basiert.

S. 418 Abb. 28

## Situationstheorien (Situational Contingency Approach)

### Einflussfaktoren des Führungserfolges:

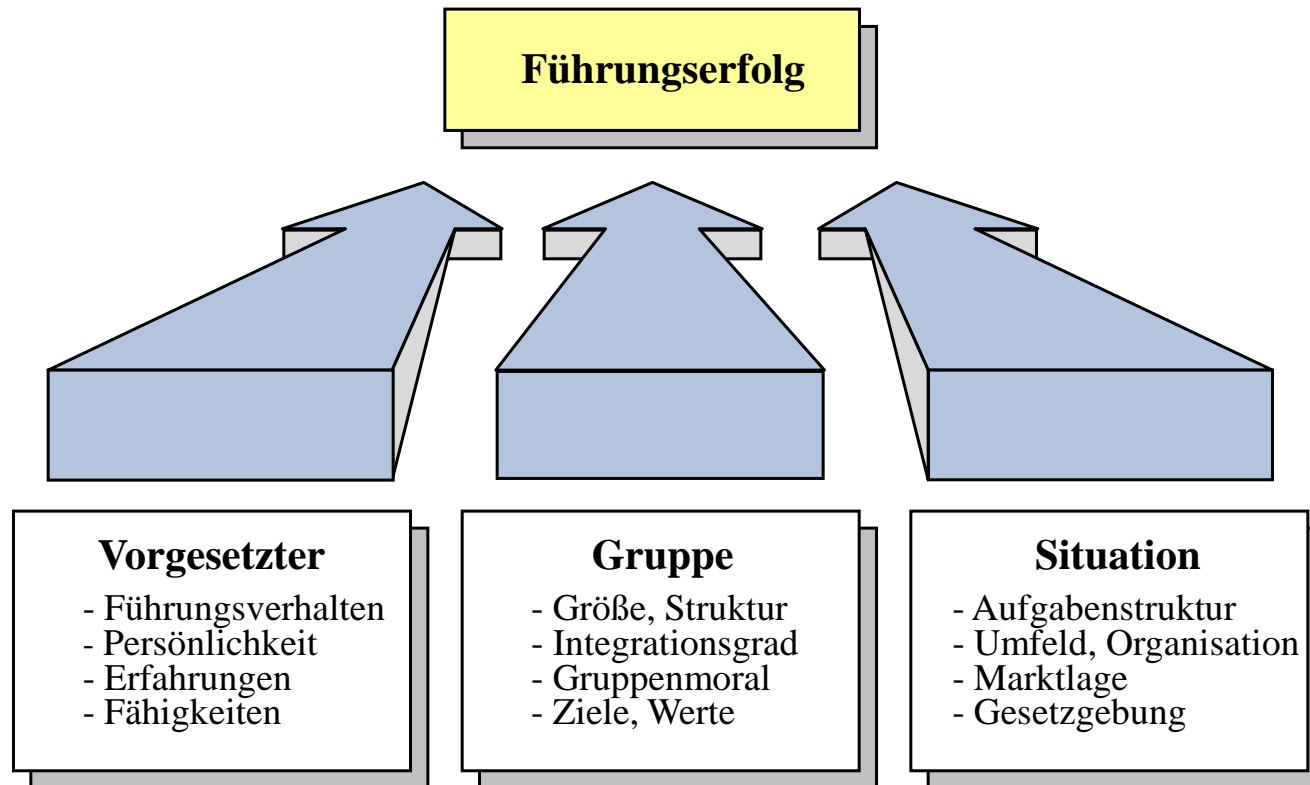

S. 419 Abb. 29

Jung, Hans: Personalwirtschaft, 9. Aufl., München 2010.

© Oldenbourg Wissenschaftsverlag





## Interaktionstheorien

Interaktionstheorien betrachten nicht nur das Verhalten der Führungskraft gegenüber den unterstellten Mitarbeitern als ausschlaggebendes Kriterium für den Führungserfolg, sondern stellen die wechselseitigen interpersonalen Beziehungen (Interaktionen) zwischen Führungskräften und Mitarbeitern in den Mittelpunkt der Analyse.

Zu den relevanten Einflussfaktoren der Interaktionstheorien zählen:

- Die Persönlichkeit der Führungskraft einschließlich ihrer Bedürfnisse, Erfahrungen und Einstellungen
- Die Persönlichkeit der Mitarbeiter einschließlich ihrer Bedürfnisse, Erfahrungen, Einstellungen und Erwartungen
- Die Struktureigenschaften und die Funktionen der Gruppe, also die interpersonalen Status-Rollen-Beziehungen und die gemeinsamen Normen
- Die spezifische Situation, in der sich die Gruppe befindet, die äußeren Bedingungen, usw.



## Führungsstiltheorien

- Führungsstil im personalwirtschaftlichen Sinn ist die Form, in der die Führungs- und Leitungsaufgaben von den Führungskräften im Rahmen der Organisation ausgeübt werden.
- Der **Führungsstil** findet seinen Ausdruck in der konkreten Verhaltensweise der Führungskräfte gegenüber ihren Mitarbeitern.
- Der Bezug ist primär auf die Führung von Mitarbeitern ausgerichtet und kennzeichnet das wechselseitige Verhalten von Führer und Geführtem.
- Unterschiedliche Führungsstile drücken sich demzufolge in einem unterschiedlichen Kooperationsverhältnis zwischen Vorgesetzten und Mitarbeiter aus.



Führung als  
wechselseitiger  
Einflussprozess

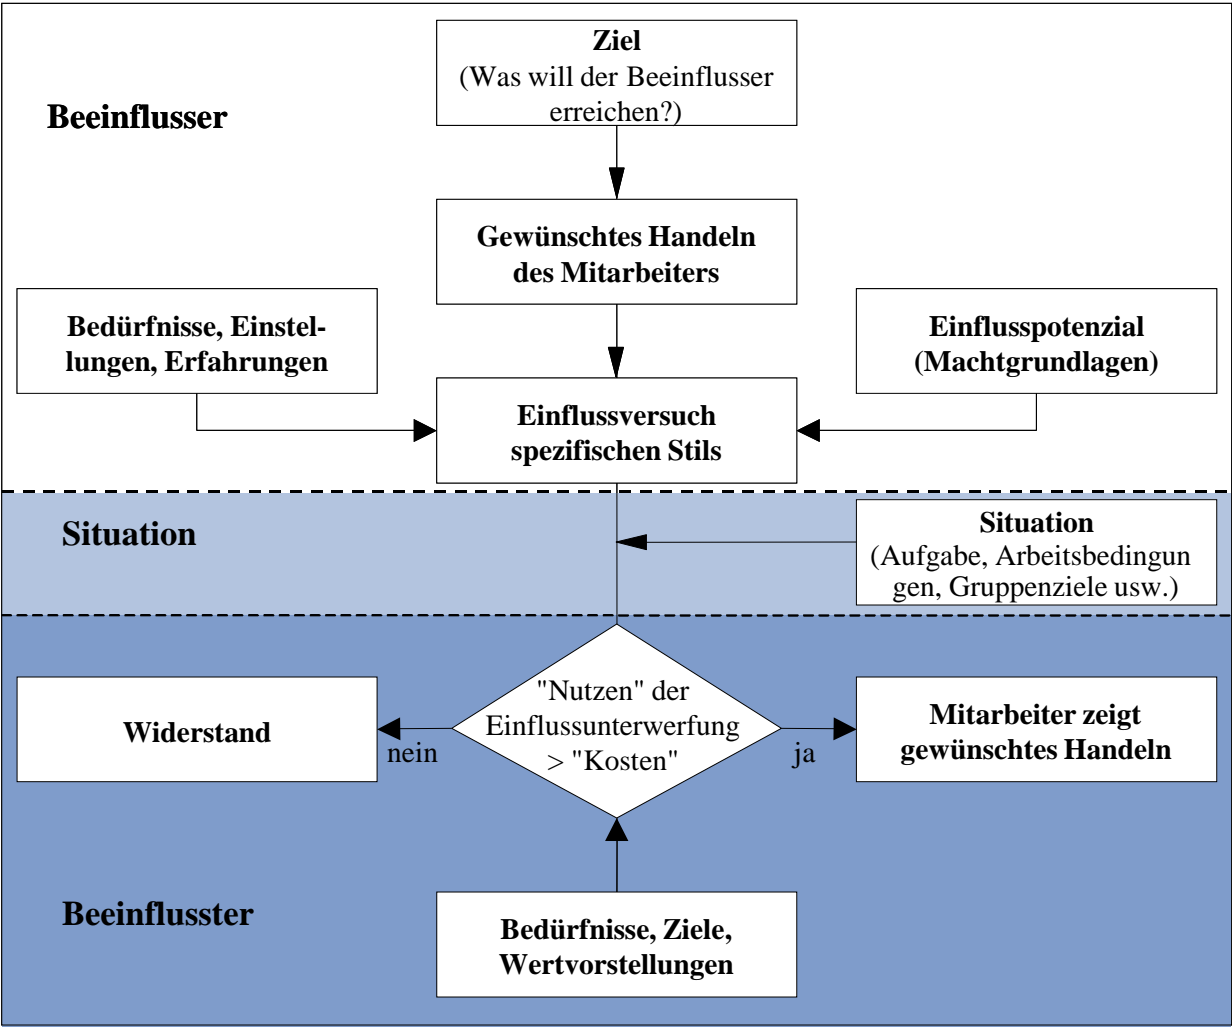

S. 420 Abb. 30  
(in Anlehnung an: Klaus, H.: Führung: Können oder Kunst? in: Personal, Heft 5/1994, S. 227)

## Führungsstiltypologien

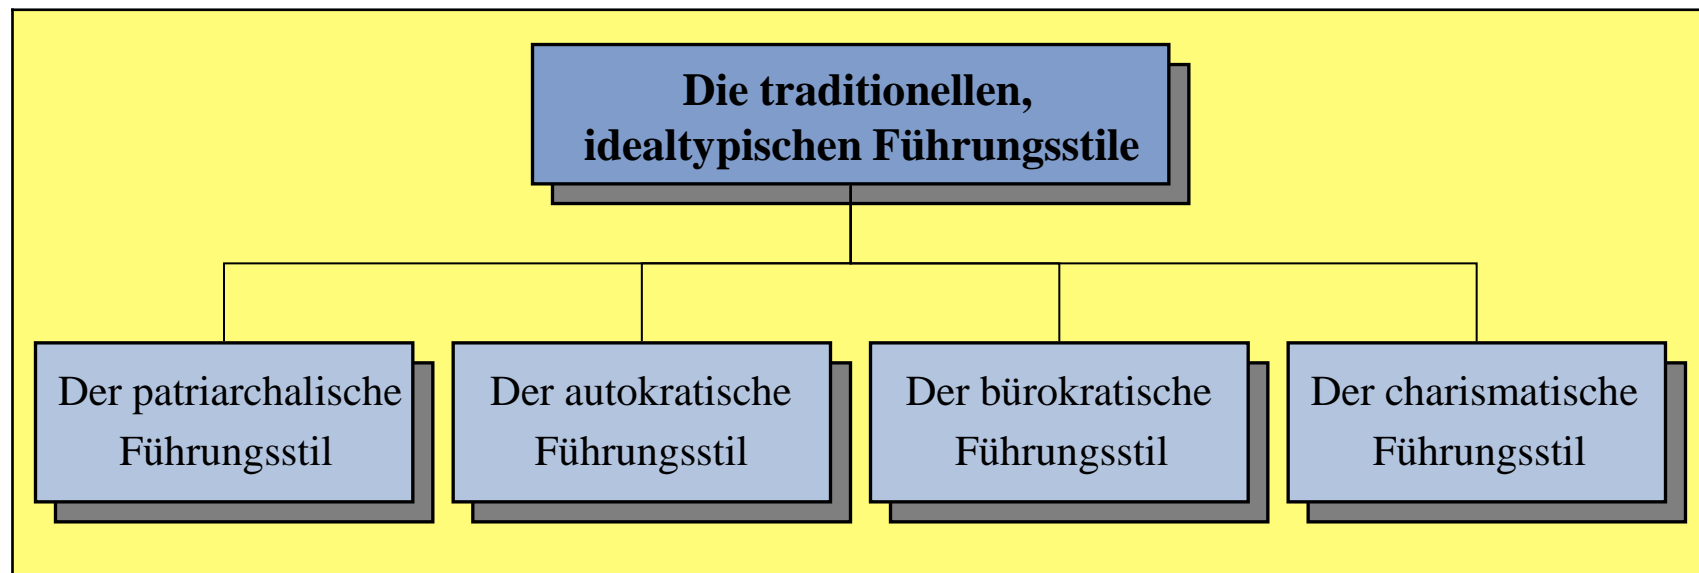

S. 422 Abb. 31

Jung, Hans: Personalwirtschaft, 9. Aufl., München 2010.

© Oldenbourg Wissenschaftsverlag



Der Ansatz von Tannenbaum und Schmidt

Eindimensionale Klassifikation von Führungsstilen

| Autoritärer Führungsstil → ← Kooperativer Führungsstil        |                                              |                                                          |                                                                                 |                                                                                 |                                                                                 |                                                                                                |
|---------------------------------------------------------------|----------------------------------------------|----------------------------------------------------------|---------------------------------------------------------------------------------|---------------------------------------------------------------------------------|---------------------------------------------------------------------------------|------------------------------------------------------------------------------------------------|
| Entscheidungsgewicht beim Führer                              |                                              |                                                          |                                                                                 | Entscheidungsspielraum der Gruppe                                               |                                                                                 |                                                                                                |
| 1.<br>Vorgesetzter entscheidet und teilt die Entscheidung mit | 2.<br>Vorgesetzter "verkauft" Entscheidungen | 3.<br>Vorgesetzter schlägt Ideen vor und erwartet Fragen | 4.<br>Vorgesetzter schlägt Versuchsent-scheidung vor, die ge-ändert werden kann | 5.<br>Vorgesetzter zeigt das Problem, erhält Lö-sungsvor-schlag und entscheidet | 6.<br>Vorgesetzter gibt Grenzen an und for-dert die Grup-pe auf, zu entscheiden | 7.<br>Vorgesetzter gestattet den Mitarbeitern, in den sys-tembedingten Grenzen frei zu handeln |

S. 424 Abb. 33



**Tannenbaum** und **Schmidt** sind der Auffassung, dass keiner der sieben Führungsstile grundsätzlich zu bevorzugen ist.

Sie nennen stattdessen einige Faktoren, die bei der Wahl des "richtigen" Führungsstils zu berücksichtigen sind:

➤ **Charakteristika des Vorgesetzten:**

Wertesystem, Vertrauen in die Mitarbeiter, Führungsqualitäten, Sicherheitsempfindungen in einer bestimmten Situation

➤ **Charakteristika der Mitarbeiter:**

Erfahrungen, fachliche Kompetenz, Problemengagement, Ansprüche im Hinblick auf die berufliche und persönliche Entwicklung

➤ **Charakteristika der Situation:**

Art der Organisation, Eigenschaften der Gruppe, Art des Problems, zeitlicher Abstand zur Handlung

## Das Verhaltensgitter von Blake und Mouton

### Grunddimensionen des Führungsverhaltens

Aufbauend auf diesem zweidimensionalen Modell der **Ohio-Gruppe** werden **zwei** Grunddimensionen des Führungsverhaltens unterschieden:



**Die Mitarbeiterorientierung**

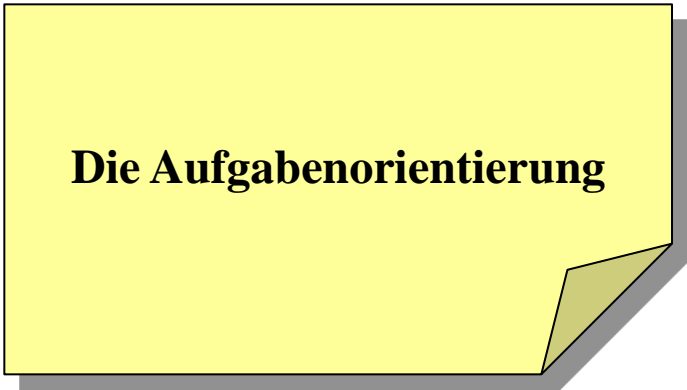

**Die Aufgabenorientierung**



**Die Mitarbeiterorientierung** (übersetzt etwa "wohlwollende Berücksichtigung". Gemeint ist ein Verhalten **consideration**)

- "Consideration" bedeutet sinngemäß zwischen dem Vorgesetzten und der Gruppe, das auf gegenseitigem Vertrauen, Respekt, menschlicher Wärme, Zugänglichkeit, Rücksichtnahme u.ä. beruht.
- Dies bedeutet jedoch nicht, dass die Anweisungs- und Kontrollbefugnis oder die Sanktionsmacht aufgehoben werden. Wichtig ist bei diesem Verhalten, dass die Vorgesetzten wirkliches Interesse an den Bedürfnissen der Mitarbeiter zeigen und dies durch ihr Verhalten auch zum Ausdruck bringen.

**Aufgabenorientierung (initiating structure)**

- "Initiating structure" lässt sich sinngemäß mit "vorstrukturierender und stimulierender Aktivität" übersetzen. Gemeint sind die Aktivitäten und Verhaltensweisen der Vorgesetzten, die unmittelbar den Produktionsprozess fördern.
- Dies kann z.B. ein eindeutiges Abgrenzen der Rolle jedes Gruppenmitgliedes, eine strikte Aufgabenzuteilung, das Aufzeigen von Wegen zur Zielerreichung oder das Drängen auf Produktivität und auf Erfüllung der Planziele sein.





Das Führungsverhaltens-  
gitter nach  
Blake & Mouton

S. 427 Abb. 33  
(in Anlehnung an: Blake, R. R./Mouton,  
J. S.: Verhaltenspsychologie im Betrieb,  
2. Auflage, Düsseldorf 1986, S. 27.)

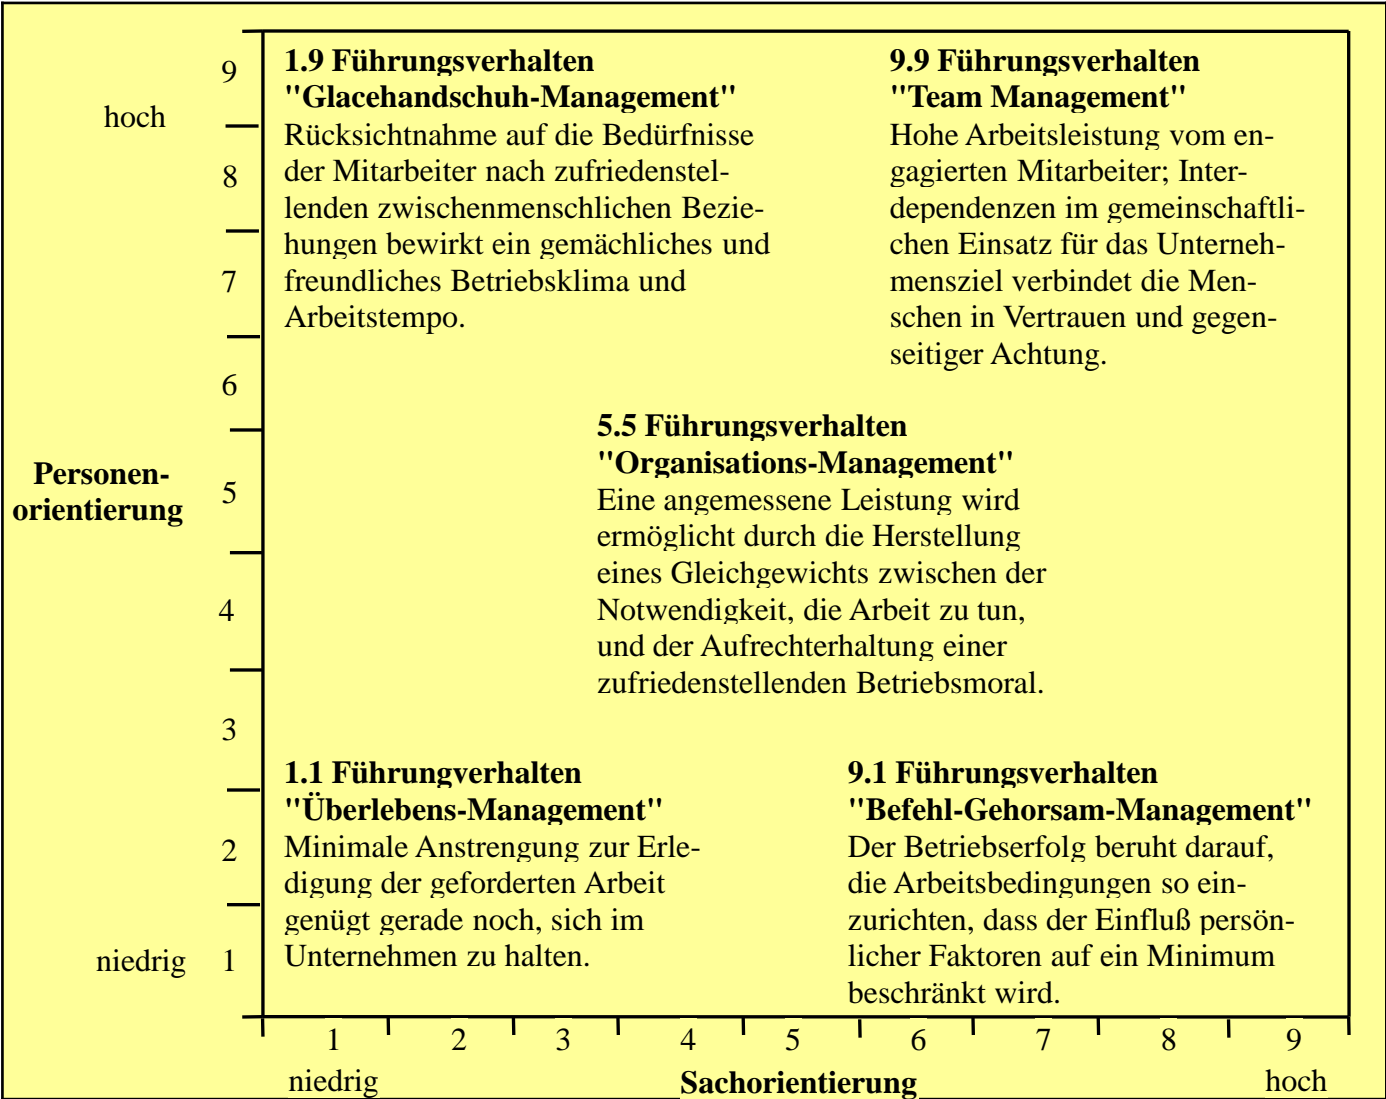



Insgesamt enthält der **Ansatz von Blake und Mouton** jedoch viele Anregungen für die Praxis und stellt für Seminare ein gutes **didaktisches Mittel** dar, um Führungsprobleme, vor allem Probleme beim vereinbaren von humanen und ökonomischen Zielen, zu verdeutlichen.

- ➔ Abweichend von Blake und Mouton kann man auch die Auffassung vertreten, dass sich eine erfolgreiche Personalführung durch einen Führungsstil kennzeichnen lässt, der im Verhaltensgitter rechts der Diagonale zwischen den Führungsstilen 1.9 und 9.1 liegt.
- ➔ Dies macht die praktische Umsetzung dieser Theorie realistischer als die Forderung nach einem 9.9-Führungsstil als einzig effektivem Führungsverhalten.

## Erfolgreiche Führungsstile im Managerial Grid

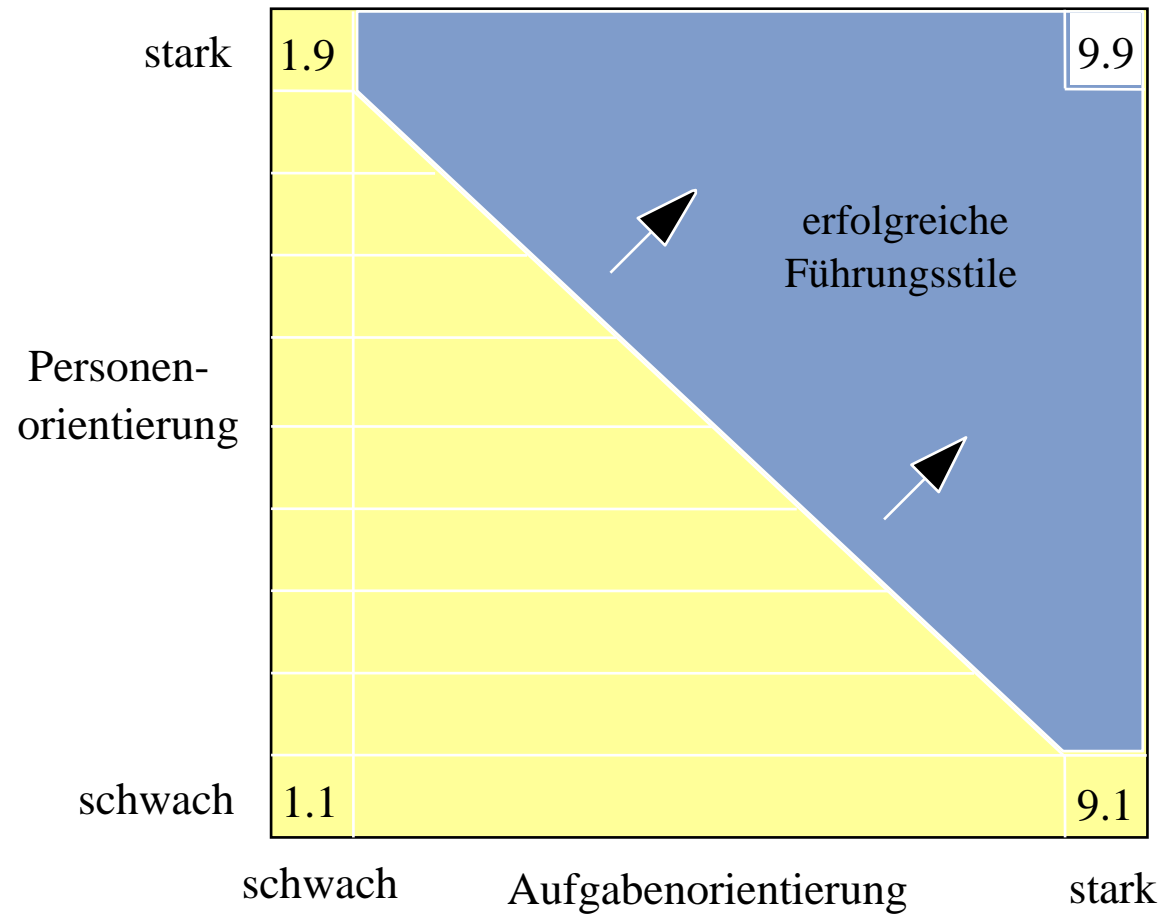

S. 429 Abb. 34

## Das 3-D-Modell von Reddin

Das 3-D-Modell von Reddin geht von den Dimensionen Aufgabenorientierung und Beziehungsorientierung, vergleichbar mit den Dimensionen Sachorientierung und Menschenorientierung im Verhaltensgitter von Blake und Mouton, aus. Aus diesen zwei Dimensionen leitet er vier Grundstile ab:

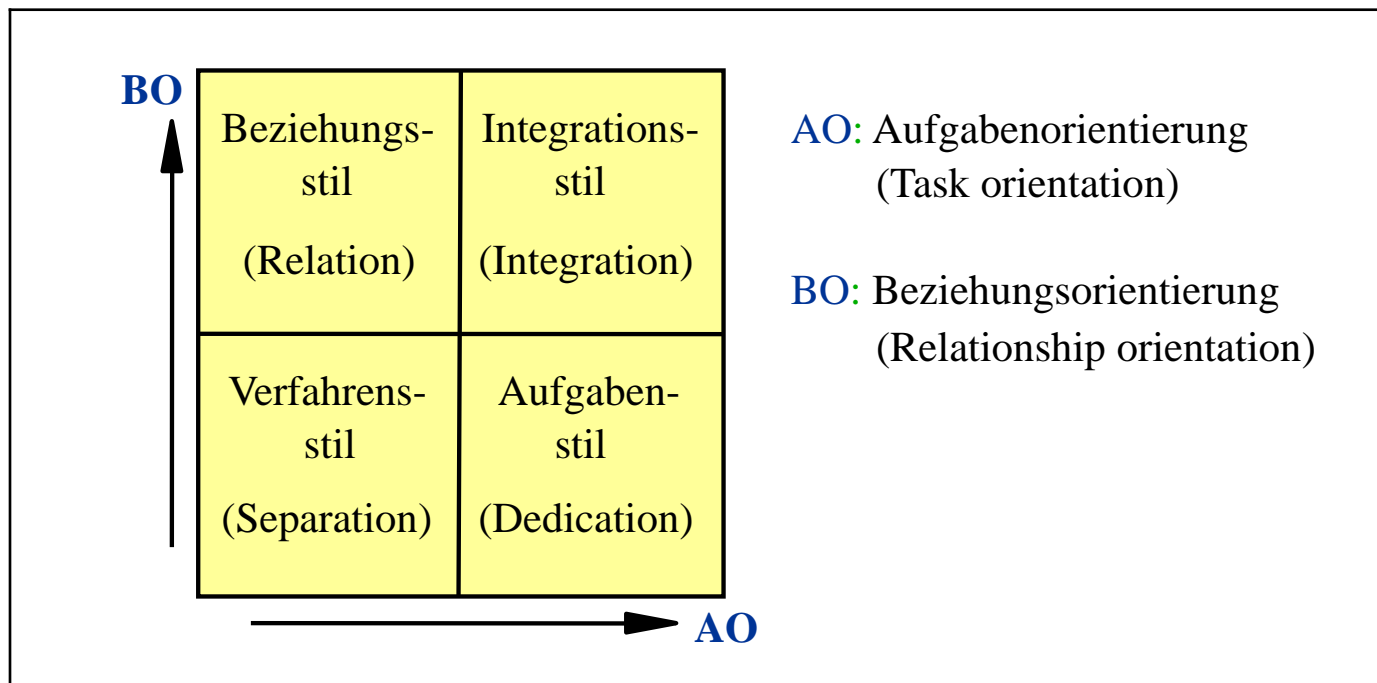

S. 430 Abb. 35

(in Anlehnung an: Reddin, W. J.: Das Drei-D-Programm zur Leistungssteigerung des Managements, Landsberg am Lech 1981)

Jung, Hans: Personalwirtschaft, 9. Aufl., München 2010.

© Oldenbourg Wissenschaftsverlag

- Er bestreitet dabei die Existenz eines einzigen optimalen, situationsunabhängigen Führungsstiles.
- Reddin ist vielmehr der Meinung, dass alle vier Stile je nach Situation effizient und gut sein können.
- Es ist die Aufgabe der Führungskraft, die konkrete Führungssituation zu analysieren und daraufhin den geeigneten Führungsstil zu wählen. Als Variable zur Bestimmung der Führungssituation unterscheidet Reddin:

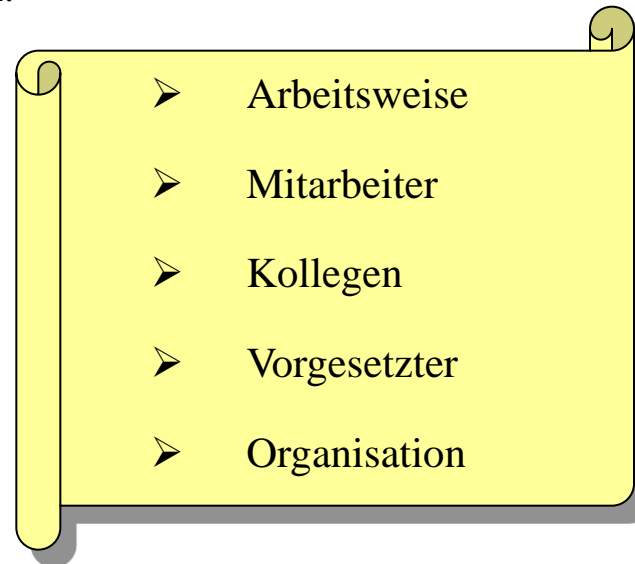



Führungsstile und Effektivität in Reddin 3-D-Theorie

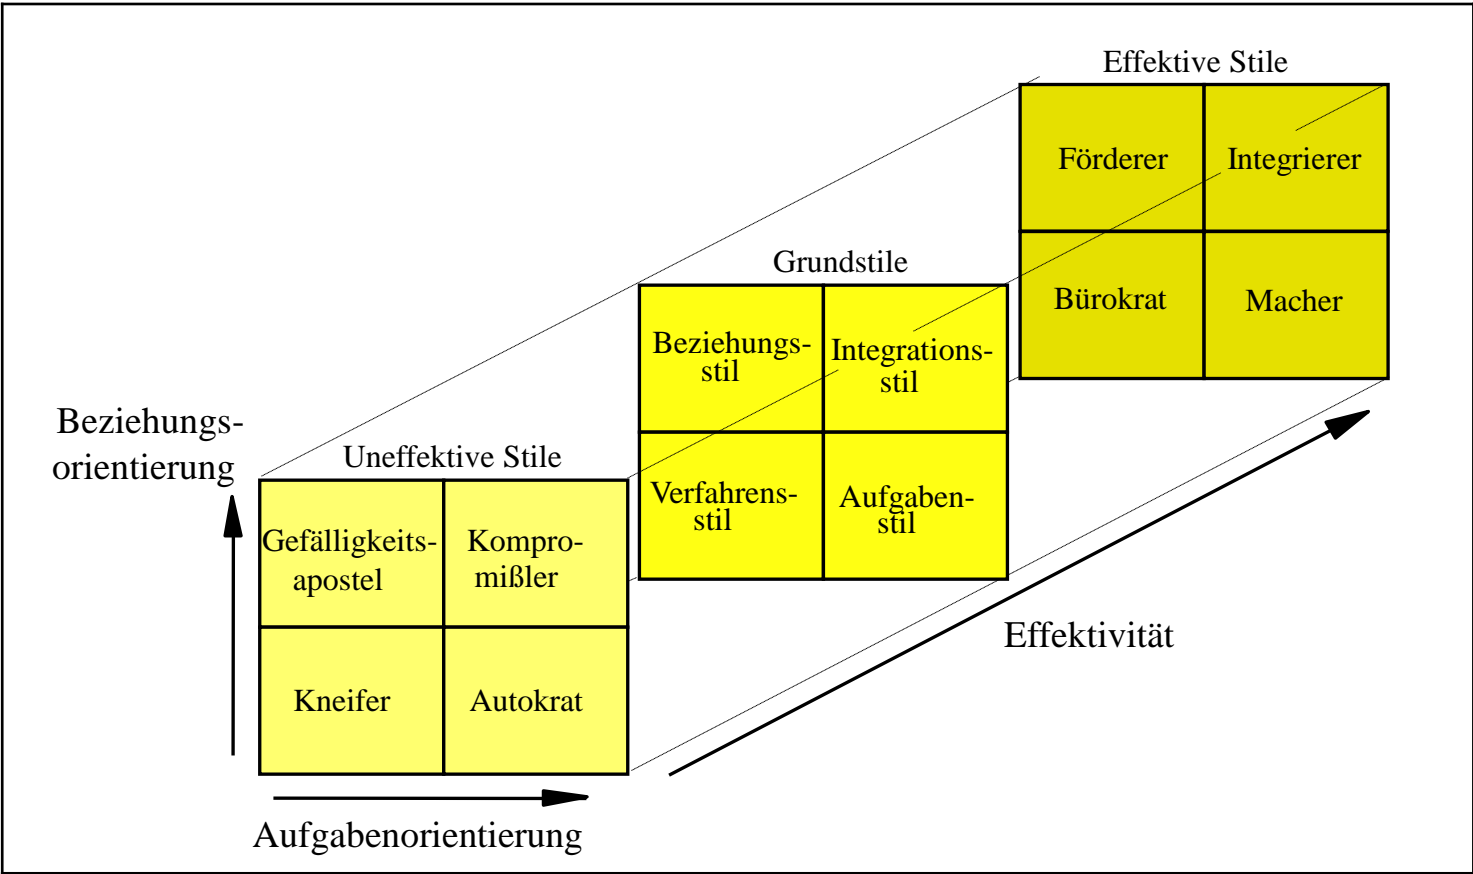

S. 431 Abb. 36



## Die situative Führungstheorie von Hersey & Blanchard

Folgende vier Führungsstile werden von Hersey und Blanchard unterschieden:

**Autoritärer Führungsstil (telling)**

**Integrierender Führungsstil (selling)**

**Partizipativer Führungsstil (participating)**

**Delegationsstil (delegating)**



Das situative Führungs-  
konzept nach  
Hersey & Blanchard

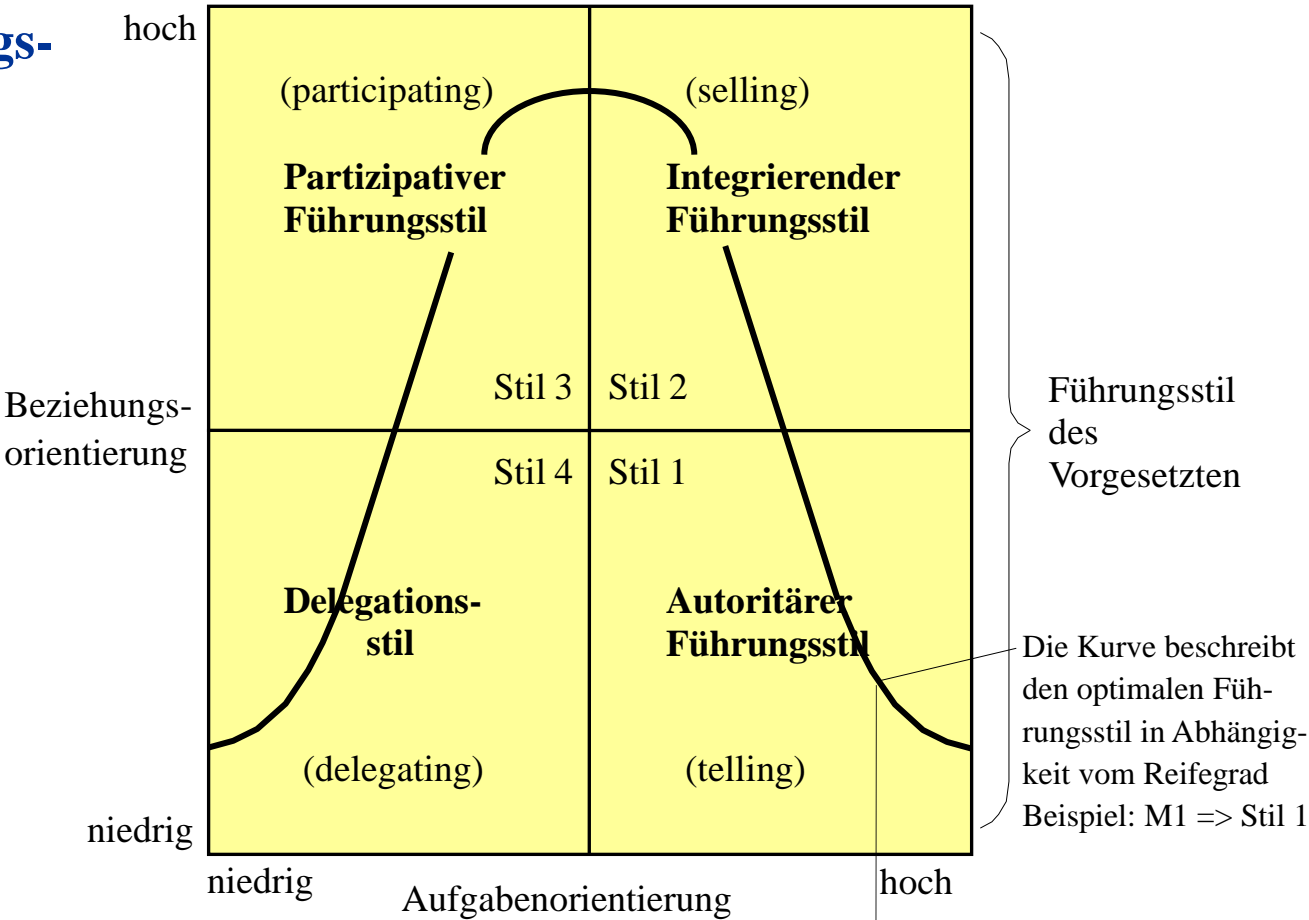

S. 433 Abb. 37  
In Anlehnung an Hersey, P./Blanchard,  
K. H.: Management of Organizational Behaviour, 3. Auflage,  
Englewood Cliffs 1977 & Engelwood Cliffs 1982

| hoch | mittelmäßig |    | niedrig | Aufgabenrelevanter Reifegrad der/ des Mitarbeiter(s) |
|------|-------------|----|---------|------------------------------------------------------|
| M4   | M3          | M2 | M1      |                                                      |



## Die Kontingenztheorie von Fiedler

Kontingenztheorien erklären den Führungserfolg aus dem Zusammenwirken von Merkmalen der führenden Person einerseits und den spezifischen Bedingungen der Führungssituation andererseits.

F.E. Fiedler traf daher aus der Vielzahl von Einflussgrößen eine Auswahl von seiner Meinung nach besonders entscheidenden und umfassenden Faktoren.

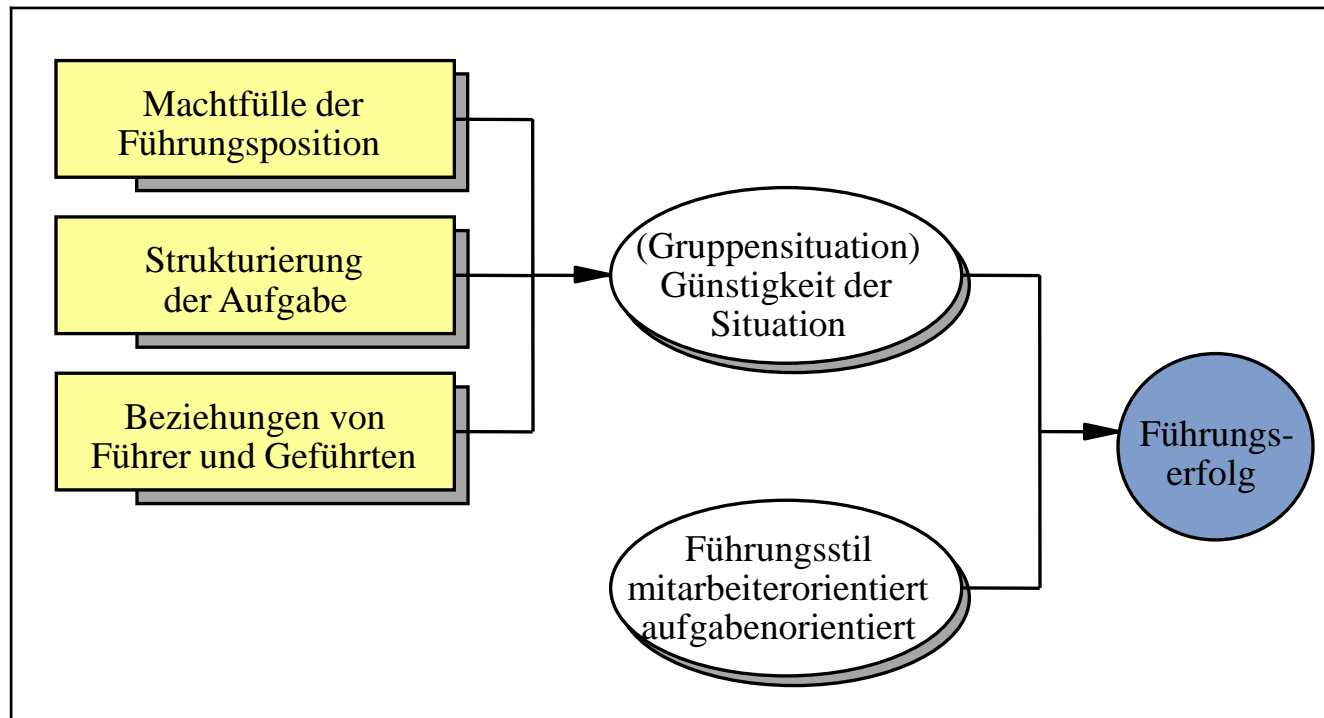

S. 435 Abb. 38



- Fiedler nimmt bei seinem Ansatz nur eine Führungsverhaltensdimension an. Er geht von der **Annahme** aus, dass man entweder **aufgabenorientiert** oder **mitarbeiterorientiert** führt. Er vertritt also nicht die Meinung von einer Unabhängigkeit dieser zwei Orientierungen.
- Zur Ermittlung des praktizierten Führungsstiles schlug Fiedler die Messung des LPC-Wertes (**Least Preferred Coworker**: der am wenigsten geschätzte Mitarbeiter) vor. Hierzu erhält der Vorgesetzte einen Fragebogen, in dem 16 gegensätzliche Adjektivpaare aufgeführt sind.
- Auf einer Skala von 1 bis 8 soll er nun den Mitarbeiter kennzeichnen, mit dem er am schlechtesten zusammenarbeiten konnte. Der höchste Wert (8) ist jeweils der positiven Merkmalsausprägung, der niedrigste Wert (1) der negativen Ausprägung zugeordnet.

|             |                 |               |
|-------------|-----------------|---------------|
| Freundlich  | 8 7 6 5 4 3 2 1 | unfreundlich  |
| Kooperativ  | 8 7 6 5 4 3 2 1 | unkooperativ  |
| Zuverlässig | 8 7 6 5 4 3 2 1 | unzuverlässig |



Kontingenzmodell  
der Führung

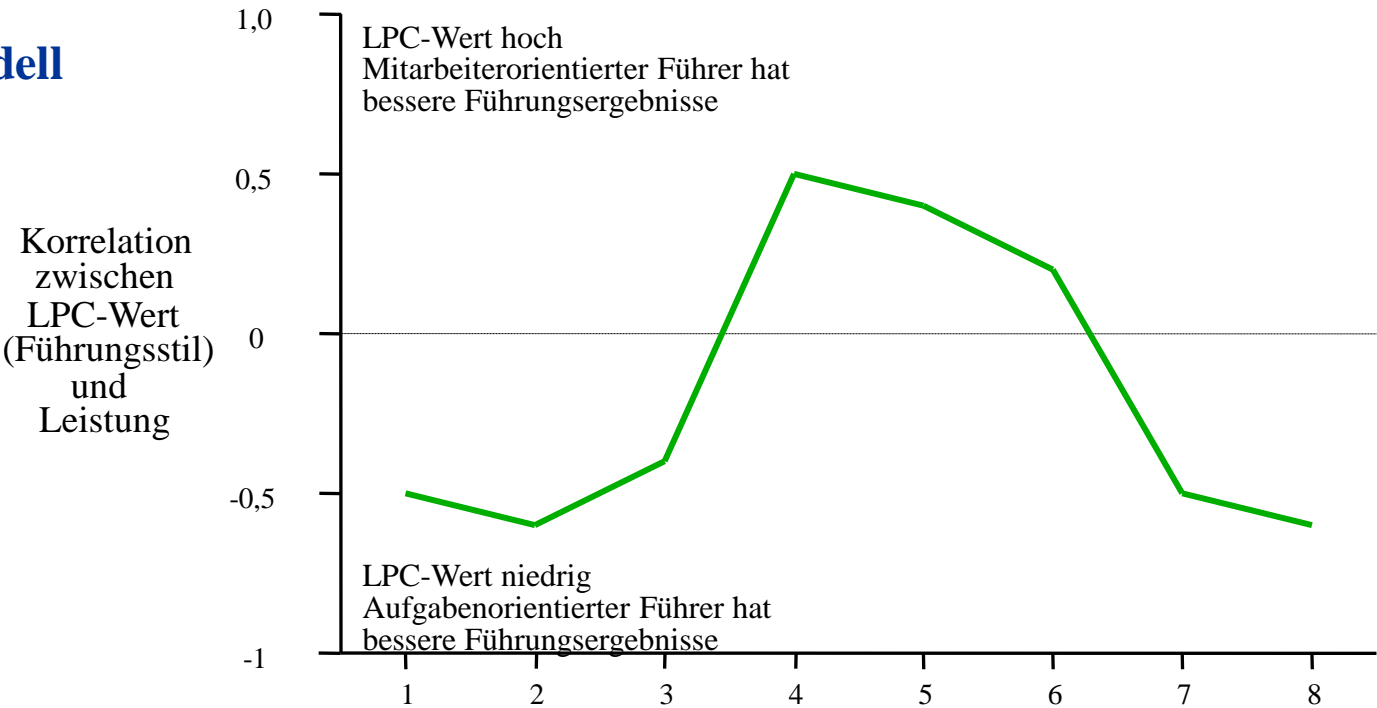

| Beziehungen<br>Führer-Mitarbeiter | Gut   |         |         |         | Schlecht |         |         |         |
|-----------------------------------|-------|---------|---------|---------|----------|---------|---------|---------|
| Aufgaben-<br>struktur             | Hoch  |         | Niedrig |         | Hoch     |         | Niedrig |         |
| Positionsmacht<br>des Führers     | Stark | Schwach | Stark   | Schwach | Stark    | Schwach | Stark   | Schwach |

S. 437 Abb. 39  
(in Anlehnung an Fiedler, F. E.: A Theory of Leadership Effectiveness, New York 1967, S. 176)



Entscheidungsbaum  
nach Vroom und Yetton

Gibt es ein Qualitätserforderni?  
Ist vermutlich eine Lösung besser  
als eine andere?

Habe ich genügend Informationen,  
um eine qualitativ hochwertige  
Entscheidung alleine treffen zu  
können?

Ist das Problem strukturiert?

Ist die Akzeptanz der Ent -  
scheidung durch die Mit -  
arbeiter für die effektive  
Ausführung wichtig?

Wenn ich die Entscheidung  
selbst treffe, würde sie  
dann von den Mitarbeitern  
akzeptiert werden?

Teilen die Mitarbeiter die  
Organisationsziele, die durch  
die Lösung des Problems  
erreicht werden soll?

Wird es zwischen den Mit -  
arbeitern vermutlich zu  
Konflikten kommen, welche  
Lösung zu bevorzugen ist?

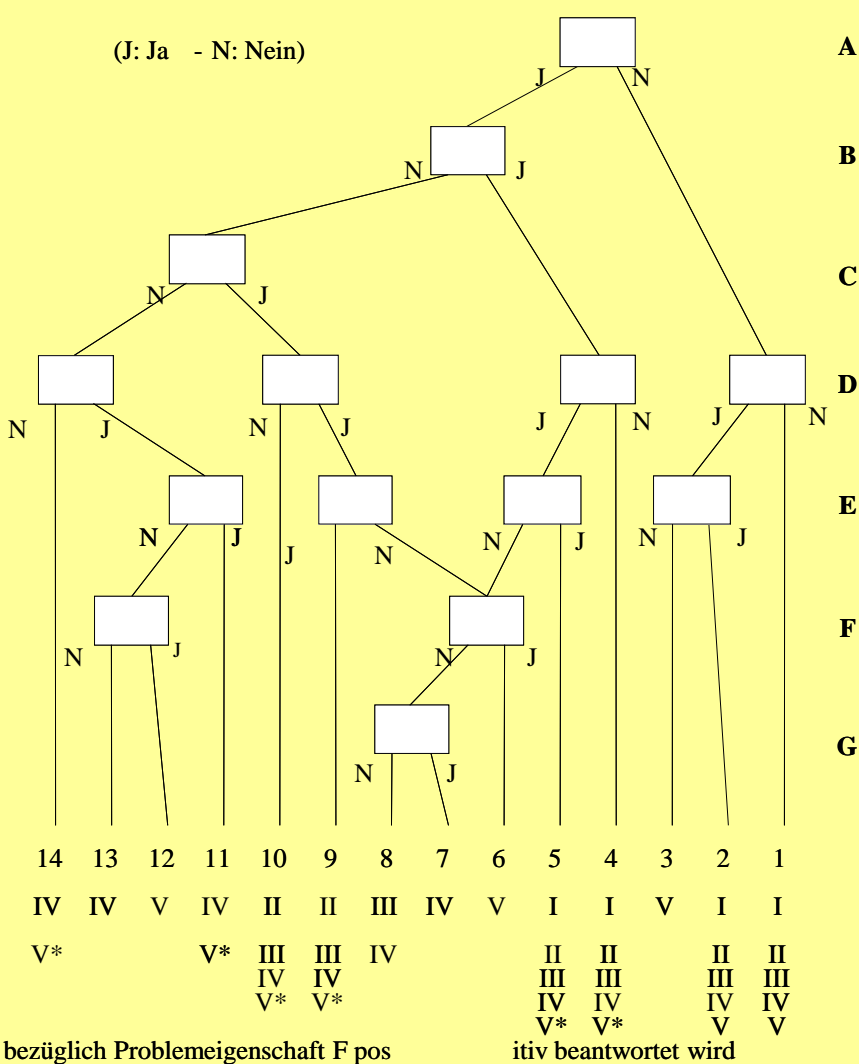

S. 439 Abb. 40  
(in Anlehnung an Vroom,  
V. H./Yetton, P. W.: Leadership and  
Decision-Making, Pittsburgh 1973, S. 36)

## Partizipationsformen nach Vroom & Yetton

**Partizipationsform I:** Der Manager entscheidet ohne weitere Aktivitäten der Informationsgewinnung aufgrund seines gegebenen Informationsstandes.

**Partizipationsform II:** Der Manager fordert zusätzliche Informationen von seinen Mitarbeitern an und entscheidet dann selbst. Die Rolle der Mitarbeiter beschränkt sich auf die Vermittlung von notwendigen Informationen; sie sind nicht an der Entwicklung und Bewertung von Alternativen beteiligt.

**Partizipationsform III:** Der Manager diskutiert das Entscheidungsproblem getrennt mit den einzelnen Mitarbeitern und nimmt deren Ideen und Vorschläge zur Kenntnis. Dann fällt der Manager die Entscheidung, die nicht notwendigerweise den Einfluss der Mitarbeiter widerspiegeln muss.

**Partizipationsform IV:** Der Manager diskutiert das Entscheidungsproblem mit seinen Mitarbeitern in einer Gruppensitzung und nimmt die Gruppenideen und Vorschläge zur Kenntnis. Dann fällt der Manager die Entscheidung, die nicht notwendigerweise den Einfluss der Gruppe widerspiegeln muss.

**Partizipationsform V:** Der Manager präsentiert das Entscheidungsproblem seinen Mitarbeitern auf einer Gruppensitzung. Gemeinsam werden in der Gruppe Alternativen entwickelt und bewertet sowie der Versuch der Erzielung einer Einigung unternommen. Der Manager übernimmt dabei gewissermaßen die Funktion eines Moderators. Er versucht nicht, die Gruppe zur Übernahme der eigenen Lösung zu bewegen. Vielmehr ist er bereit, jede Lösung, die von der Gruppe getragen wird, zu akzeptieren und durchzusetzen.

S. 440 Abb. 41

(in Anlehnung an: Gebert, D./Rosenstiel, L. v.: Organisationspsychologie, 5. Auflage, Stuttgart 2002, S 208)

Jung, Hans: Personalwirtschaft, 9. Aufl., München 2010.

© Oldenbourg Wissenschaftsverlag

## Der Führungsprozess

Führungskräfte tragen die Verantwortung dafür, dass gemeinsam mit den Mitarbeitern bestimmte Leistungen erbracht werden.

Hieraus ergeben sich zwei Kategorien von Aufgaben, die Sachaufgaben und die Führungsaufgaben. Während die Sachaufgaben von Führungskräften je nach funktionaler Tätigkeit (z.B. Vertrieb oder Produktion) unterschiedlich geartet sind, lassen sich Führungsaufgaben formal in folgende Führungsfunktionen unterteilen:

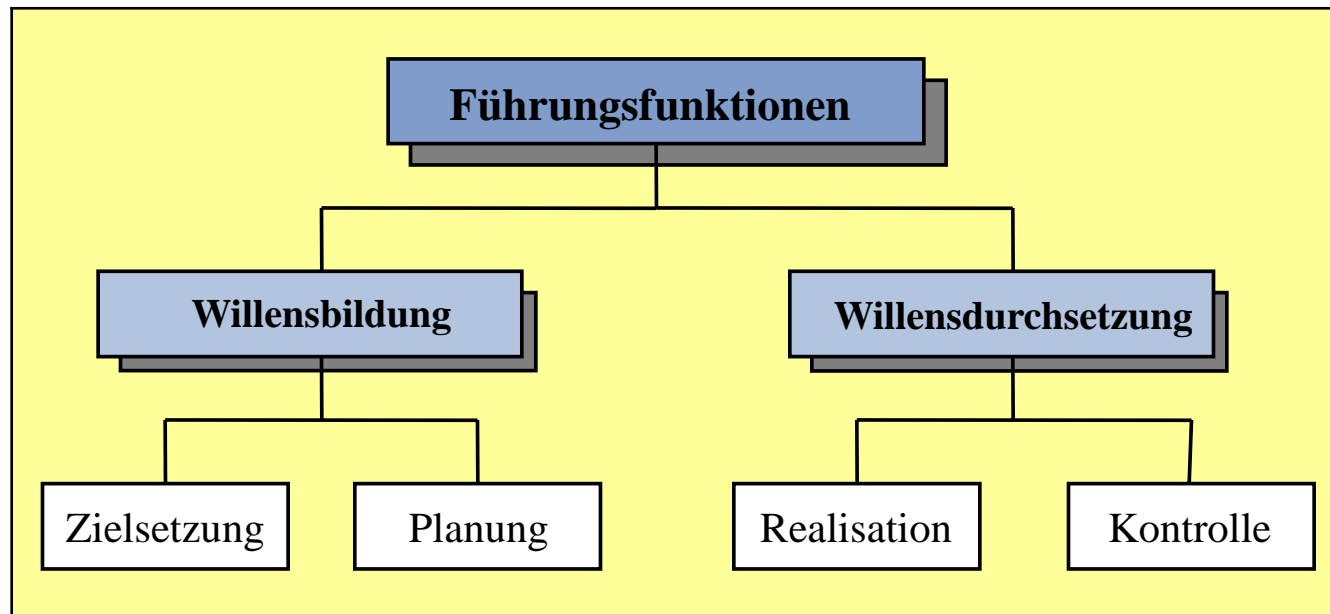

S. 441 Abb. 42

## Managementkreis

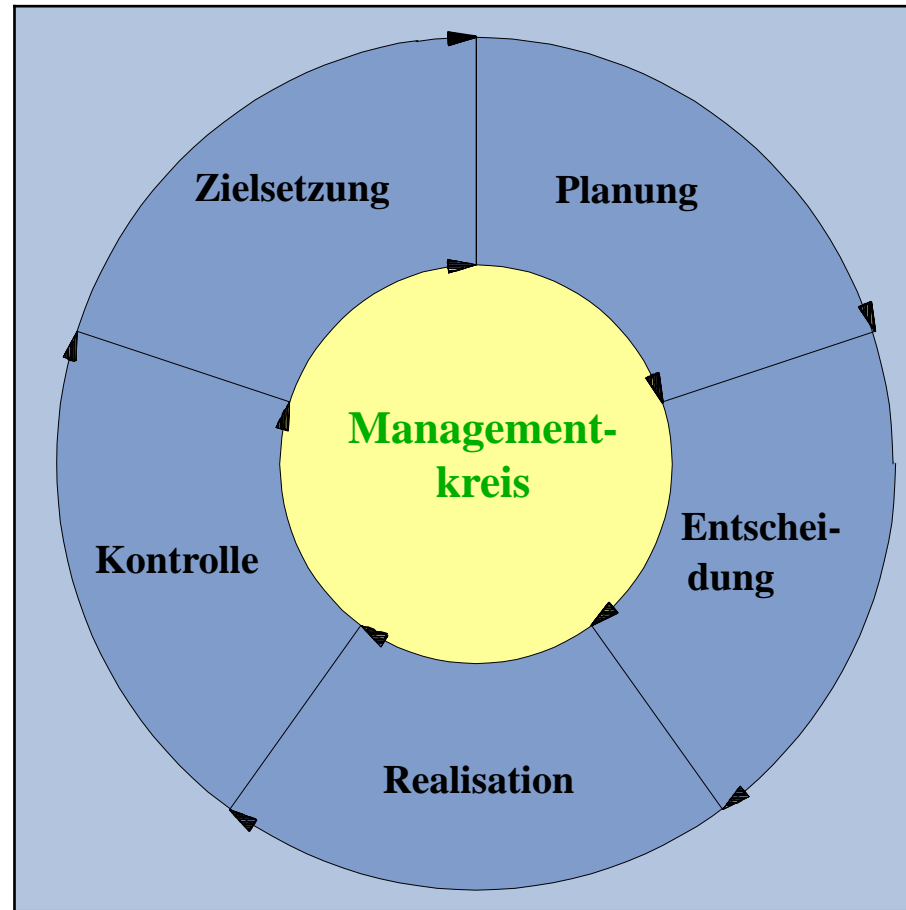

S. 442 Abb. 43

Jung, Hans: Personalwirtschaft, 9. Aufl., München 2010.

© Oldenbourg Wissenschaftsverlag

## Der Zielbildungsprozess

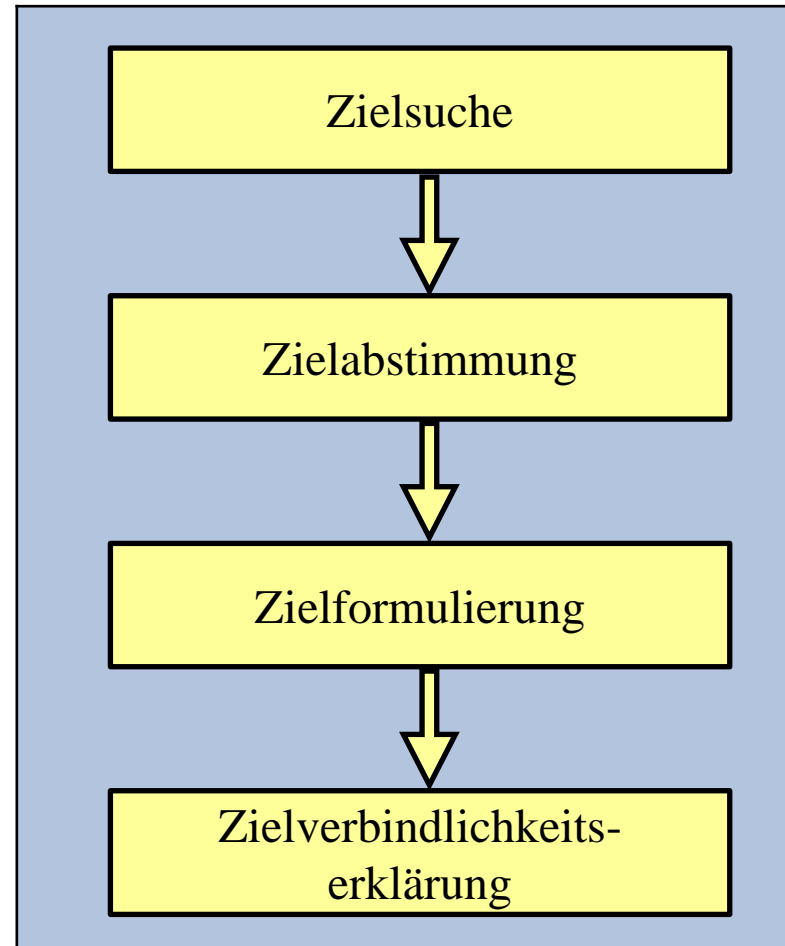

S. 443 Abb. 44





## Die Prinzipien der Planung

- **Prinzip der Vollständigkeit:** Das Prinzip der Vollständigkeit verlangt, dass alle erreichbaren Informationen aufbereitet, bewertet und verarbeitet werden. Es sollen soweit wie möglich alle relevanten inner- und außerbetrieblichen Tatbestände in die Planung mit einbezogen werden.
- **Prinzip der Genauigkeit:** Alle Informationen sollten auf ihre Richtigkeit oder Zuverlässigkeit überprüft werden. Entscheidend hierbei ist jedoch eine aufgabenspezifische Genauigkeit, dass heißt, die Genauigkeit ist abzustimmen auf die Planungsaufgaben.
- **Prinzip der Kontinuität:** Um systematische und langfristige Entscheidungshilfen erarbeiten zu können, darf nicht nur sporadisch geplant werden, sondern die Planung sollte in möglichst fortlaufenden und in zeitlich aufeinander abgestimmten Perioden erfolgen.
- **Prinzip der Flexibilität:** Oft sind die Umweltbedingungen, die bei der Aufstellung des Planes galten, gewissen Wandlungen unterlegen. Eine Planung sollte Flexibilität besitzen, um diese Änderungen in den laufenden Plan mit einbeziehen zu können.
- **Prinzip der Wirtschaftlichkeit:** Die Planung muss unter dem Aspekt der Wirtschaftlichkeit durchgeführt werden, d.h. der Aufwand für die Planerstellung muss immer in einem vertretbaren Verhältnis zur Aussagefähigkeit und Anwendbarkeit des Plans stehen.



## Der Planungsprozess

- **Setzen der Planungsziele** (**Was** will ich erreichen und **wie** will ich es erreichen?)
- **Situationsanalyse** (**Wie** ist die Lage?)
- **Entwicklung von Planalternativen** (**Welche** Handlungsmöglichkeiten habe ich?)
- **Bewertung von Alternativen** (**Welche** Vor- und Nachteile sind damit verbunden?)
- **Auswahl der optimalen Planalternative** (**Welche** Möglichkeit ist die günstigste?)
- **Abweichungskontrolle und Plankorrektur** (Liege ich noch **richtig**?)



## Die Entscheidung

"Das Treffen von **Entscheidungen** ist eine Erscheinung, die das menschliche Handeln allgemein kennzeichnet. Grundlage menschlicher Entscheidungen sind sachliche Informationen und rationale Überlegungen.

Sie werden aber auch geprägt durch weltanschauliche, religiöse, ethische, politische und soziale Normen; weitere Einflüsse psychologischer Art ergeben sich aus Hemmungen in Form von Zögern oder Vermeidens risikoreicher Entscheidungen."

Bevor eine Entscheidung getroffen wird, sollten auch mögliche negative Auswirkungen der Entscheidung durchdacht werden. Je wichtiger und schwerwiegender die Entscheidung, desto mehr Zeit und intensive Überlegungen sind notwendig.

Man sollte daher wissen, welchen Entscheidungs-Kriterien man folgt, darauf achten, alle möglichen Alternativen in die Entscheidung mit einzubeziehen und die Auswirkungen der Entscheidungen durchdenken, bevor man handelt.

## Die Realisation

Dem Planungs- und Entscheidungsprozess schließt sich die Funktion Realisation an. In dieser Phase erfolgt die Durchführung der gedanklich im Plan festgelegten Maßnahmen. Es geht hier um die praktische Umsetzung des Gewollten zur Erreichung des Planziels.

Es ist nicht die Aufgabe der Führungskräfte, die zur Verwirklichung der Sachaufgaben erforderlichen Tätigkeiten selbst auszuführen, sondern es geht vielmehr darum, generelle Regelungen der Verteilungs- und Arbeitsbeziehungen (Organisation) zu treffen und durch Einwirken auf die Mitarbeiter dafür zu sorgen, dass der Plan verwirklicht wird.

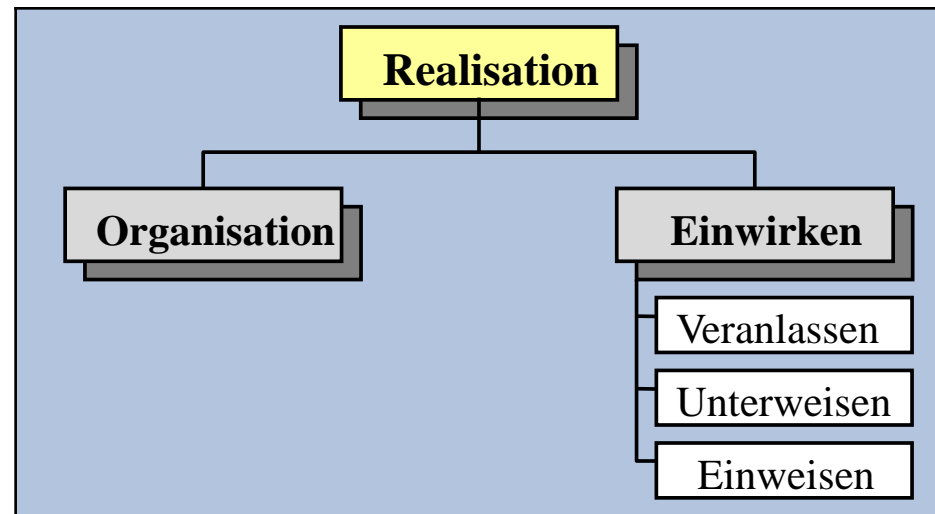

S. 446 Abb. 45

## Die Kontrolle

Während die vorhergehenden Management-Funktionen die Steuerung des Betriebsprozesses ermöglichen, ist für eine Regelung die Funktion Kontrolle notwendig. Erst dadurch ist es möglich, dass eine für die Regelung des Betriebsgeschehens erforderliche Rückkoppelung (Feedback) stattfindet.

Bei der Kontrolle werden Soll-Größen der Planung mit Ist-Größen der Realisation verglichen, um Auskunft über den Grad der Planerfüllung zu erhalten. Um Kontrollen durchführen zu können, müssen Standards festgelegt werden.

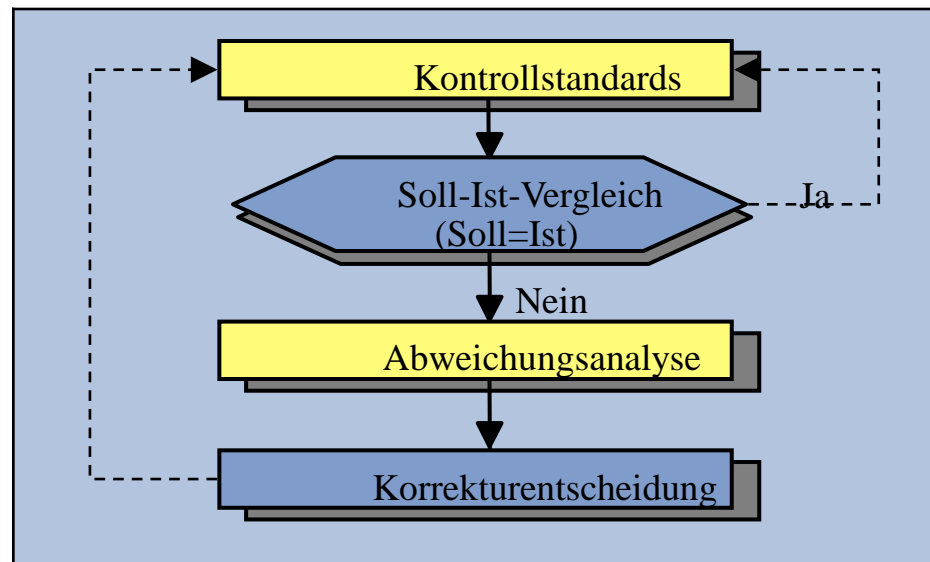

S. 448 Abb. 47

## Führungsaufgaben

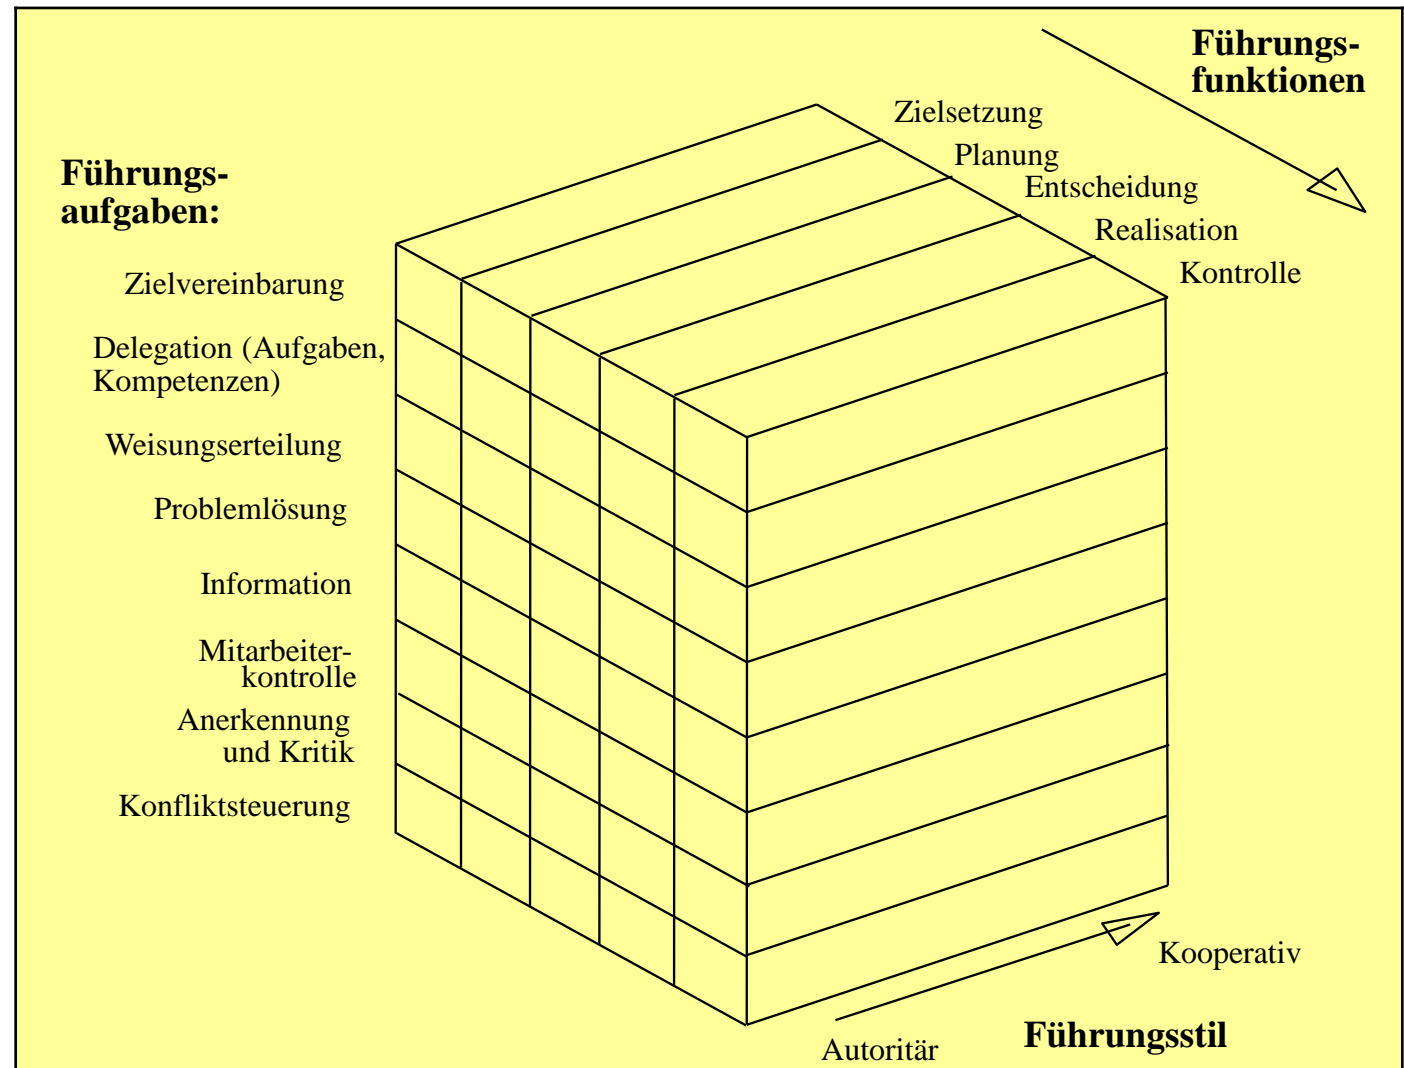

S. 449 Abb. 47



## Zielvereinbarung

- Die strategischen Unternehmensziele werden von der Unternehmensleitung vorgegeben (Führungsfunktion des Top-Managements).
- Zur Umsetzung durch die Mitarbeiter müssen diese Ziele operationalisiert werden, d.h. jedem Mitarbeiter muss ein auf die Unternehmensziele abgestimmtes, individuelles Teilziel vorgegeben werden.
- Häufig erfolgt diese individuelle Zielsetzung jedoch nicht als Zielvorgabe, sondern wird zwischen Führungskraft und Mitarbeiter vereinbart.



## Delegation

Damit das Delegieren den erhofften Erfolg erbringt, sind drei Faktoren aufeinander abzustimmen:

1. Die **Aufgaben**, die mit der Position verbunden sind.
2. Die **Befugnisse** (Kompetenzen), die der Mitarbeiter besitzt, um der Aufgabe gerecht zu werden.
3. Die **Verantwortung**, die sich aus der Aufgabenstellung und den zugehörigen Befugnissen ergibt.



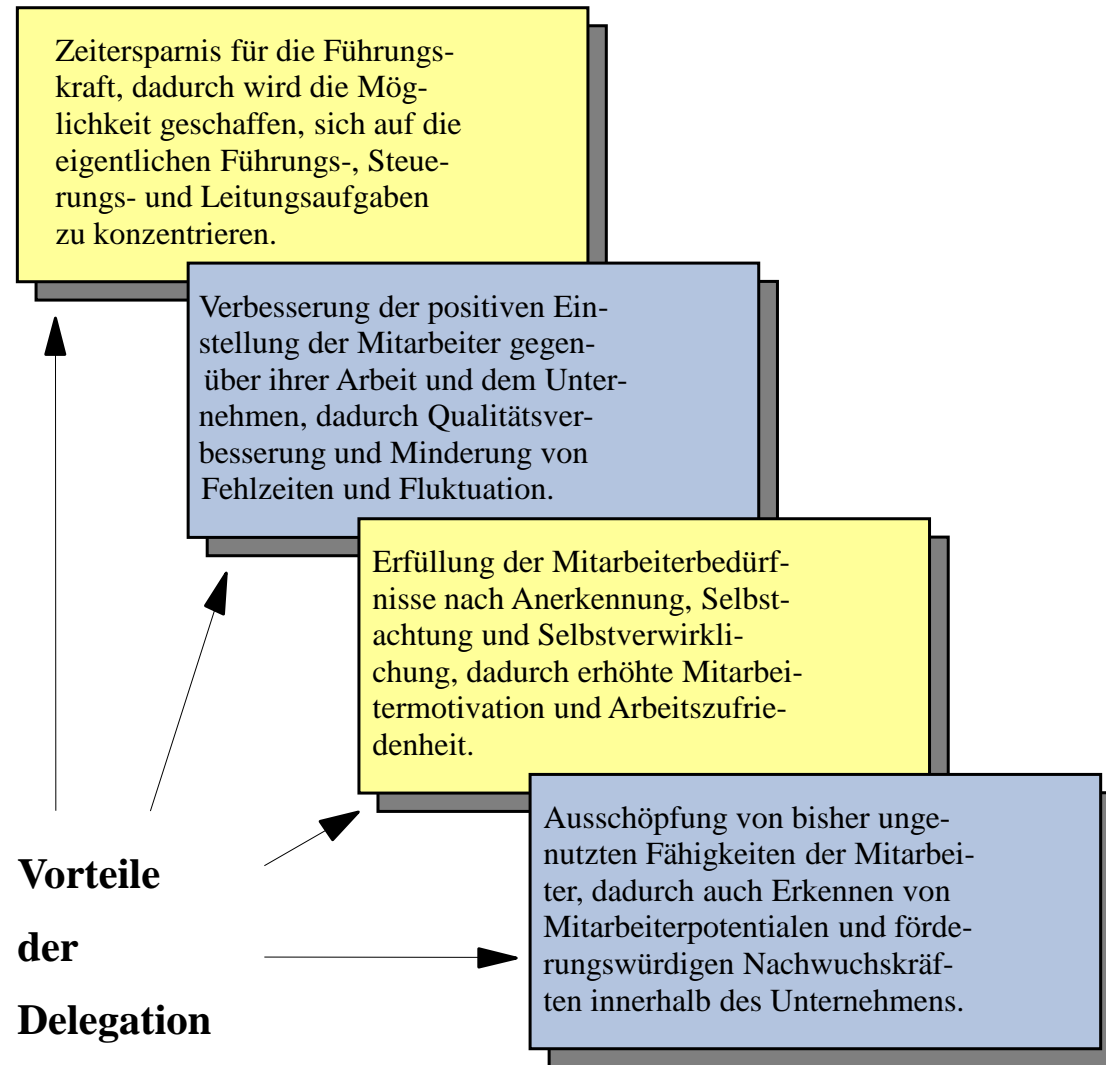



## Erteilung von Weisungen

### 1. Der Befehl:

Diese Form der Weisung ist heute in den wenigsten Fällen als Mittel zur Führung gebräuchlich. Der Befehl ist bei Mitarbeitern unbeliebt und schließt das Mitdenken und die Fähigkeit, eigeninitiativ zu arbeiten, aus.

Lediglich zur Abwehr einer unmittelbaren Gefahr dient ein knapper und unmissverständlicher Befehl als effektives Kommunikationsmittel. Ein derartiger Befehl muss anschließend erläutert und begründet werden, um beim Mitarbeiter die Einsicht für die Situation zu fördern.

### 2. Das Kommando:

Die Absicht des Kommandos ist es, die Kräfte von verschiedenen Mitarbeitern gleichzeitig an einem Ort zu konzentrieren, etwa beim Anheben einer Last. Das Kommando muss zuvor mit allen Beteiligten vereinbart, kurz und mitreißend sein.

Es ist nicht wichtig, dass das Kommando vom Vorgesetzten selber kommt. Der Kommandogeber muss aber von seiner Position alles übersehen können und alle Sicherheitsvorkehrungen getroffen haben.

### 3. Die Anweisung:

Anweisungen müssen dann vom Vorgesetzten gegeben werden, wenn die Art und Weise, wie eine Arbeit erledigt werden soll, genau vorgeschrieben ist. Eine effektive Anweisung sollte die folgenden sieben Fragen beantworten können:



4. Der Auftrag:

Wesentlich zeitsparender als die Anweisung ist der Auftrag. Hierbei wird dem Mitarbeiter nur ein grober Rahmen vorgeben, **WAS** bis **WANN** und **WARUM** zu tun ist und es seiner Selbständigkeit überlassen bleibt, **WIE** und **WOMIT** er die Arbeit ausführt.

|              |                                                                                                                                                                         |
|--------------|-------------------------------------------------------------------------------------------------------------------------------------------------------------------------|
| <b>WAS</b>   | soll getan werden? Welches Ergebnis wird erwartet?                                                                                                                      |
| <b>WER</b>   | soll es tun? Den Geeignetsten und nicht unbedingt den Bereitwilligsten auswählen.<br>Formulierungen, wie "hier sollte jemand..." oder "man müsste..." führen zu nichts. |
| <b>WANN</b>  | soll mit der Arbeit begonnen werden, wann soll sie erledigt sein?                                                                                                       |
| <b>WIE</b>   | soll die Arbeit erledigt werden? Auf Schwierigkeiten und Gefahren hinweisen,<br>Arbeitserleichterungen nennen.                                                          |
| <b>WOMIT</b> | soll die Arbeit durchgeführt werden? Mit welchen Werkzeugen und Hilfsmitteln?                                                                                           |
| <b>WO</b>    | soll die Arbeit durchgeführt werden?                                                                                                                                    |
| <b>WARUM</b> | soll etwas so und nicht anders getan werden? Das Warum fördert das Verständnis und nimmt der<br>Anweisung den Befehlscharakter.                                         |

S. 452 Abb. 49



## Problemlösung

- Ein Problem ist dadurch gekennzeichnet, dass für eine Frage oder einen Fragenkomplex eine Antwort (Lösung) gefunden werden soll.
- Probleme können sich aus aktuellen Anlässen (z.B. erhöhter Ausschuss), aus potentiellen Fragestellungen (Erkennen einer Gefahr, z.B. Erwartung einer zukünftigen Personalüberkapazität durch schlechte Auftragslage) und aus innovatorischen Schwierigkeiten (z.B. bei der Entwicklung neuer Produkte) ergeben.
- Allgemeines Merkmal eines Problems ist demnach die Diskrepanz zwischen angestrebten Soll- und aktuellen oder erwarteten Ist-Zuständen.

## Problemlösungsprozess

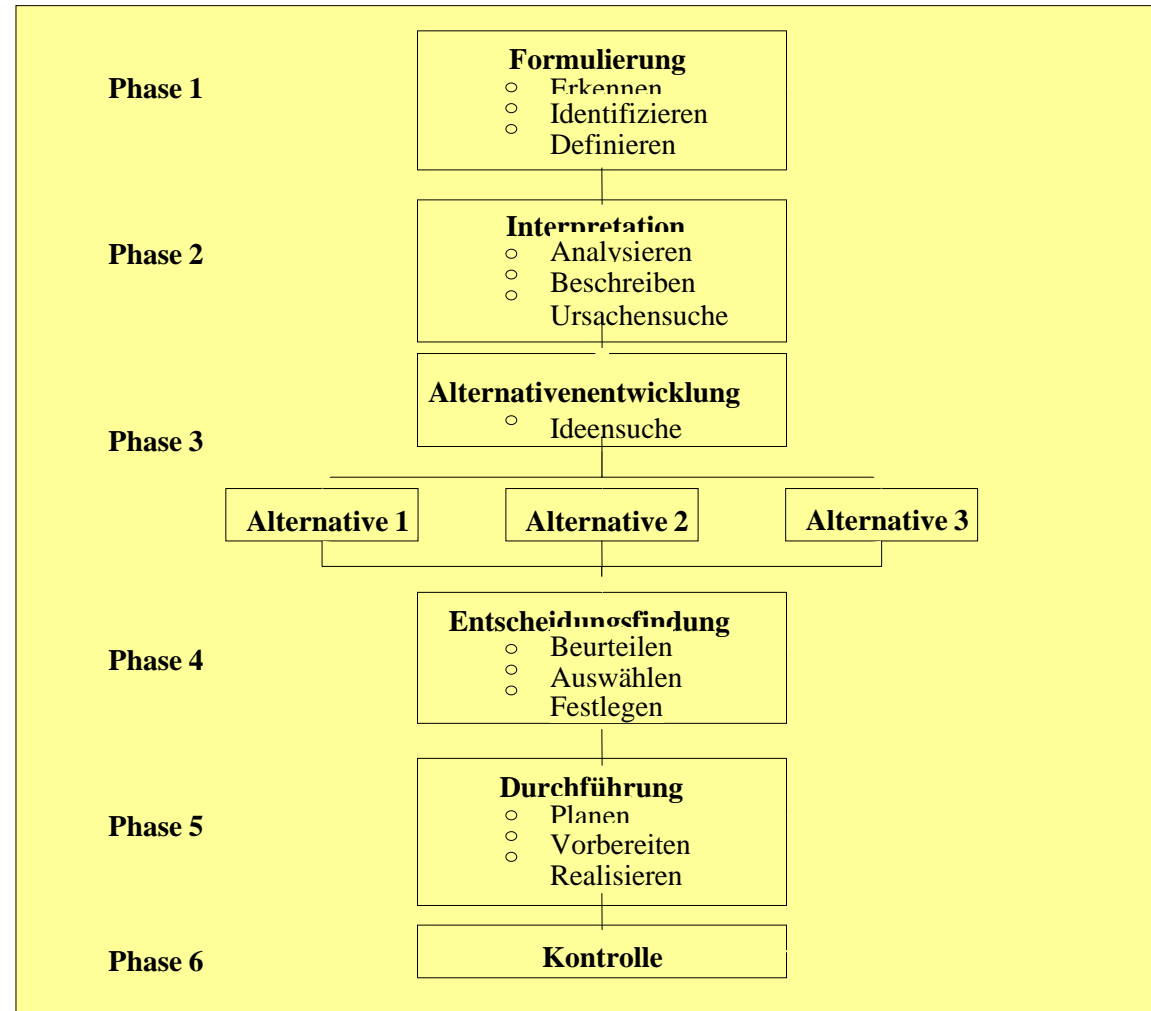

S. 454 Abb. 50

## Mitarbeiterinformation

In der heutigen Zeit ist es aus Gründen der Wirtschaftlichkeit unbedingt erforderlich, alle vorhandenen Ressourcen des Unternehmens zu nutzen. Für die Mitarbeiter heißt das, dass sie bereit und in der Lage sind, mitzudenken und mitzuverantworten.

Eine wichtige Voraussetzung dafür ist der hinreichende **Informationsstand** der Mitarbeiter, daher ist es eine Aufgabe der Führungskraft, den Mitarbeiter mit den entsprechenden Informationen zu versorgen.

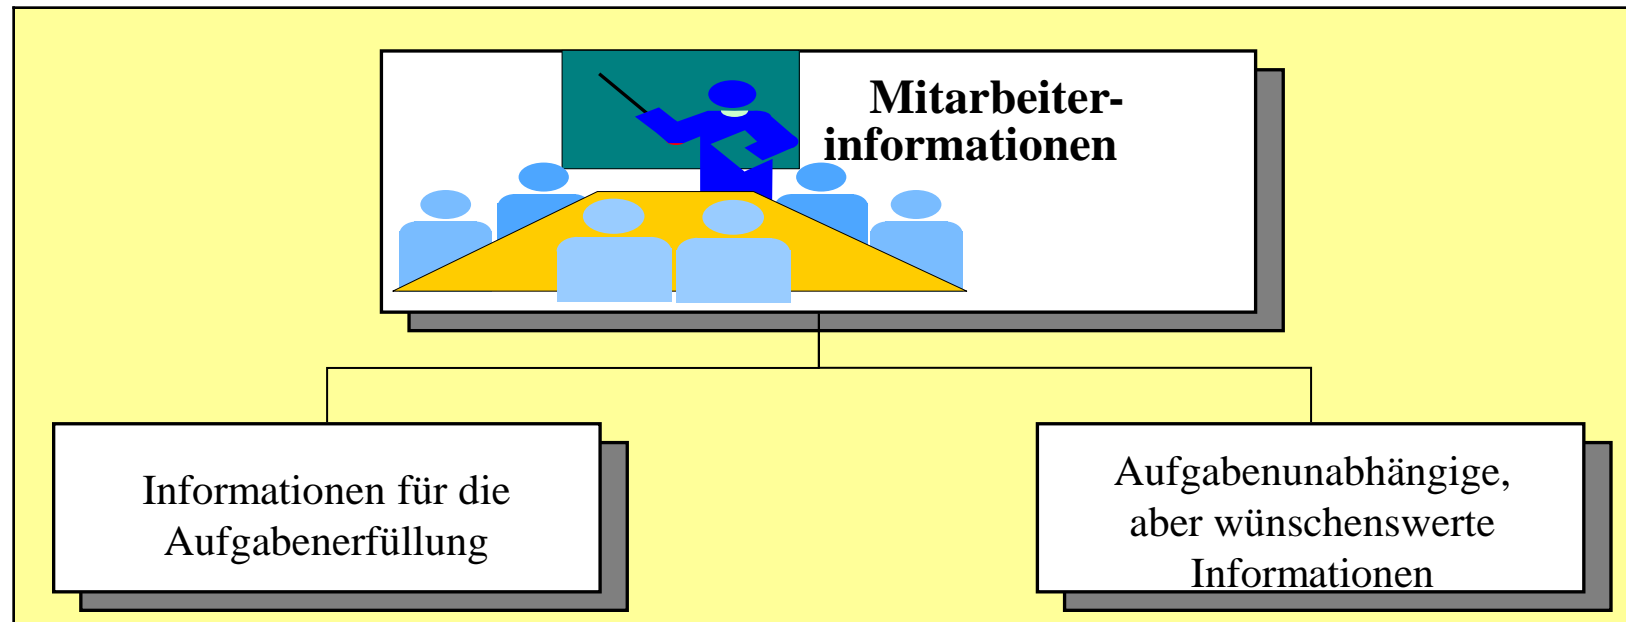

S. 455 Abb. 51



## Mitarbeiterkontrolle

Zu den Aufgaben des Führungsalltags zählt auch die Mitarbeiterkontrolle. An dieser Stelle soll nicht die Führungsfunktion "Kontrolle", sondern die konkrete Umsetzung dieser Aufgabe zwischen Vorgesetzten und Mitarbeitern dargestellt werden.

### Arten der Kontrolle sind die Ergebniskontrolle und die Verfahrenskontrolle

Bei der **Ergebniskontrolle** wird geprüft, inwieweit der Mitarbeiter seine Aufgabe quantitativ und qualitativ durchgeführt hat. Hier steht also das Ergebnis im Mittelpunkt der Kontrolle.

- Oft wird die Ergebniskontrolle von den Mitarbeitern nicht nur hingenommen, sondern auch gewünscht, denn es wird festgestellt, in welchem Maße das Ziel erreicht wurde.
- Diese Art der Kontrolle dient also auch der Information und der Bestätigung der Mitarbeiter. Sie dient somit auch der Leistungsmotivation der Mitarbeiter.



Die **Verfahrenskontrolle** hat den Vergleich zwischen tatsächlich angewandten und aufgrund vorgelagerter Planungsakte vorgeschriebenen Handlungsweisen zum Inhalt.

- Die Handlungsvorschrift bildet die Grundlage der verhaltensorientierten Kontrollen. Dieser Form der Kontrolle kommt eine große Bedeutung zu, weil die vielen Einzeltätigkeiten durch die Vorgabe von Entscheidungs- und Handlungsprogrammen koordiniert werden.
- Die Verfahrenskontrollen sollen die Einhaltung eines vorgegebenen Verfahrens kontrollieren und als Instrument der Verhaltenssteuerung dienen.
- Diese Form der Kontrolle ist bei den Mitarbeitern meist unpopulär und unbeliebt, da sie persönliche Erwartungen, Empfindungen und Einstellungen oftmals nicht berücksichtigt.





## Merksätze für eine sinnvolle Kontrolle

- Kontrollen sollen objektiv, sachlich und emotionsfrei durchgeführt werden, das gilt auch für eventuell notwendige Kritik.
- Ohne Kontrolle lassen sich Ziele nicht sicher erreichen. Kontrolle ist kein Misstrauensbeweis, sie ist zur Steuerung von Arbeitsabläufen und Verhaltensweisen auf allen Ebenen unumgänglich.
- Führungskräfte sollen nicht nur kontrollieren, wie die Mitarbeiter ihre Sachaufgaben erledigen. Sie sollen sich auch davon überzeugen, wie - falls vorhanden - Führungsaufgaben wahrgenommen werden.
- Unangemessene, allzu häufige Kontrollen sind zu vermeiden.
- Es sollte der Grundsatz gelten: Soviel Selbstkontrolle wie möglich, soviel Fremdkontrolle wie nötig.
- Ergebnisse von Kontrollen sollen besprochen werden (gute ebenso wie schlechte).
- Bei der Besprechung von Kontrollergebnissen ist darauf zu achten, dass Kontrollen keine Persönlichkeits-, sondern Leistungsbeurteilungen sind.
- Kontrolle als Hilfe und Anleitung fördert den Mitarbeiter.

# Anerkennung und Kritik

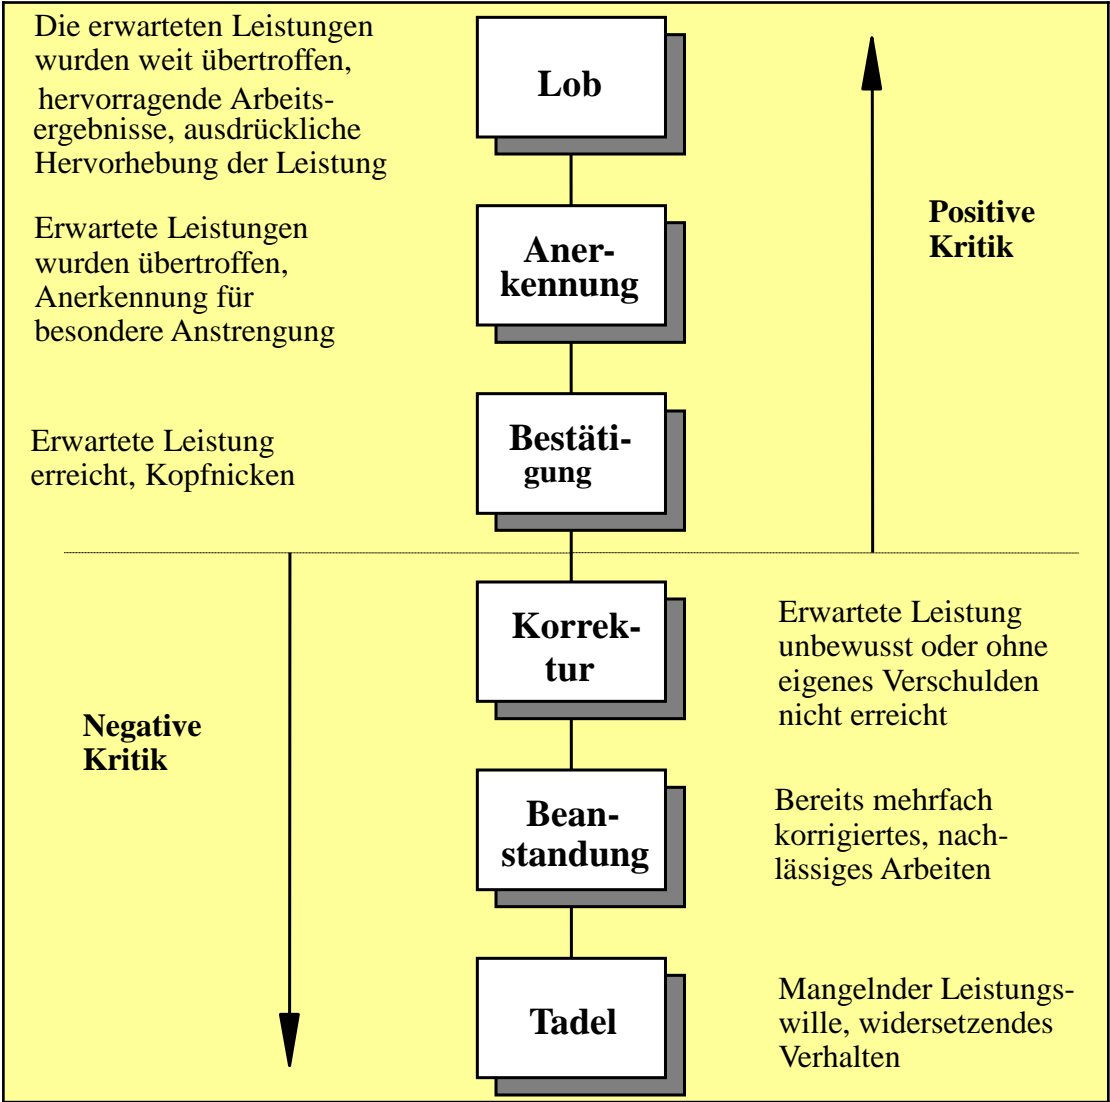

S. 459 Abb. 52



## Positive Kritik

- Die Leistung oder die Sache und nicht die Person loben.
- Die Ich-Form im Lob vermeiden (statt: "Ich finde ihren Vorschlag ausgezeichnet, weil..." besser "Der Vorschlag ist ausgezeichnet, weil..").
- Bedenken, dass das Loben eines einzelnen Mitarbeiters vor der Gruppe für diese eine Herabsetzung bedeuten kann. Daher bei lobenswerten Gruppenleistungen immer die Gruppe als Ganzes und nicht Einzelne unterschiedlich stark loben.
- Nicht zu häufig oder überschwänglich loben, da sonst der Eindruck entsteht, dass Lob nur als Mittel zum Zweck benutzt worden ist.
- Regelmäßige Anerkennung guter Leistungen erleichtert die Beanstandung unzureichender Arbeitsergebnisse.
- Wenn möglich, die Anerkennung sofort aussprechen.
- Regelmäßig prüfen, ob einzelne Mitarbeiter hinreichend Anerkennung erhalten haben oder ob aus Überlastung, Bequemlichkeit oder gar Überheblichkeit gar nicht oder zu selten gelobt wurde.
- Sich nicht von der Einstellung leiten lassen "Leistungen sind selbstverständlich, dafür werden die Mitarbeiter schließlich bezahlt".

S. 460 f.

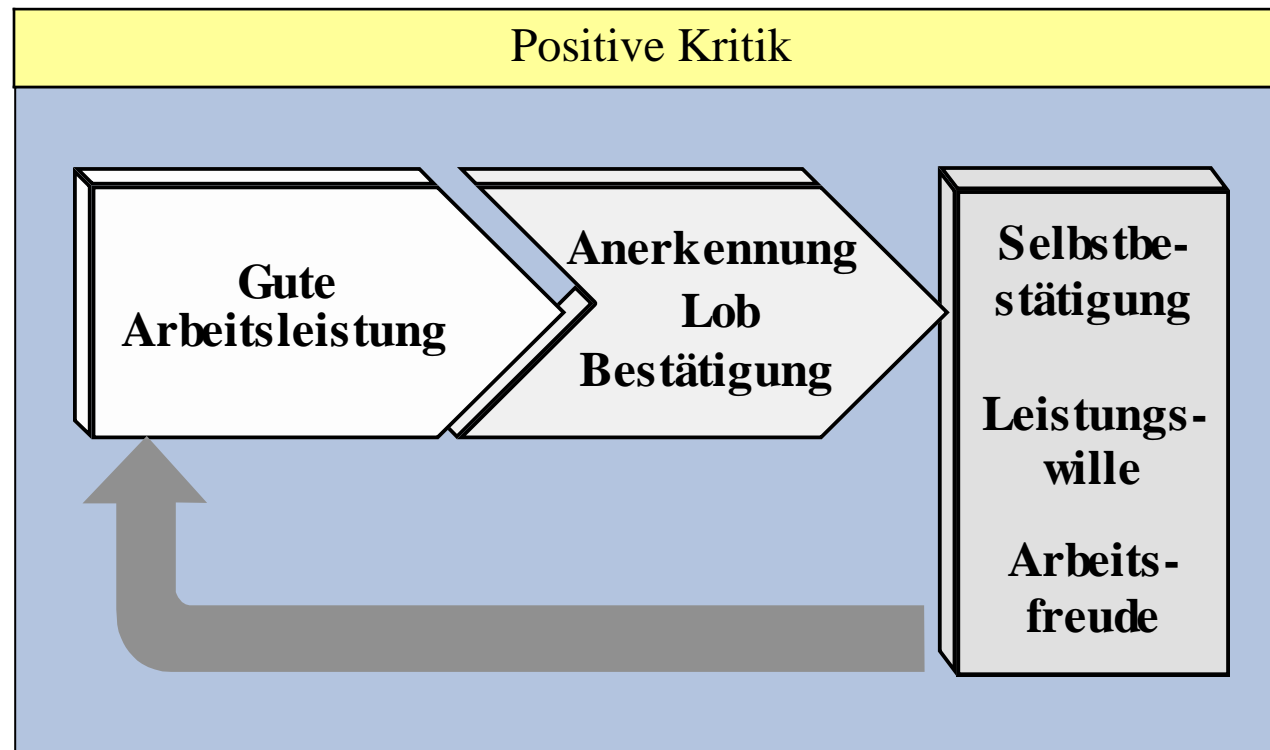



## Negative Kritik

- Fehlerhaftes Verhalten des Mitarbeiters möglichst sofort korrigieren, da sonst die Fehler zur Gewohnheit werden und sich dann umso schwerer beseitigen lassen. Bei emotional angespannten Situationen ist es unter Umständen ratsam, den Mitarbeiter zunächst etwas zeitlichen Abstand zu seinem Fehlverhalten gewinnen zu lassen, bevor dann ein Gespräch erfolgt.
- Nie persönlich werden, sondern ausschließlich die Sache kritisieren.
- Eine Beanstandung nur "unter vier Augen" aussprechen, da sonst die Gefahr besteht, dass der Mitarbeiter sein Gesicht verliert.
- Nie etwas hinter dem Rücken eines Mitarbeiters beanstanden.
- Möglichst nicht am Beginn oder am Ende einer Arbeitswoche tadeln. Den Start einer Arbeitswoche mit Anerkennung beginnen und den Mitarbeiter nicht mit einem Tadel ins Wochenende entlassen.
- Nicht aus einem Affekt heraus tadeln, wenn man sich gerade geärgert hat oder selbst gerade getadelt worden ist. Eine Kritik nicht übertreiben (Worte, wie "Nichts", "nie", "immer" vermeiden).

S. 461 f.



**(Fortsetzung)**

- Beanstandungen nicht unter Zeitdruck aussprechen. Ein erfolgversprechendes Kritikgespräch braucht Zeit. Die Beanstandung möglichst in ungestörter Atmosphäre aussprechen und zuerst ein Klima schaffen, das die Einsicht erleichtert.
- Nicht einen ironischen oder herablassenden Ton verwenden. Den Mitarbeiter so ansprechen, wie man selbst angesprochen werden möchte. Möglichst richtige Fragetechniken verwenden und den Mitarbeiter möglichst selbst auf den Fehler kommen lassen.
- Im Durchschnitt mehr anerkennen als tadeln, da dadurch Beanstandungen leichter akzeptiert werden.
- Zuhören, Entschuldigungsgründe des Mitarbeiters geduldig anhören. Dadurch wird Verständnis für die Person und die Situation gezeigt.
- Fälschlicherweise ausgesprochene Tadel sind offen zuzugeben. Auf keinen Fall mit Phrasen herausreden wollen. Nicht nachtragend sein.
- Eine Beanstandung klar und verständlich aussprechen. Wird das Fehlverhalten nur angedeutet, so kann der Eindruck entstehen, dass der Fehler nicht so gravierend war.
- Das Ausmaß einer kritischen Äußerung von der Person des Mitarbeiters abhängig machen. Vorgesetzte, die ihre Mitarbeiter kennen, wissen, dass manche schon auf ein Stirnrunzeln reagieren, während bei anderen erst eine Reaktion eintritt, wenn sie deutlich, vielleicht sogar wiederholt getadelt werden.

S. 461 f.

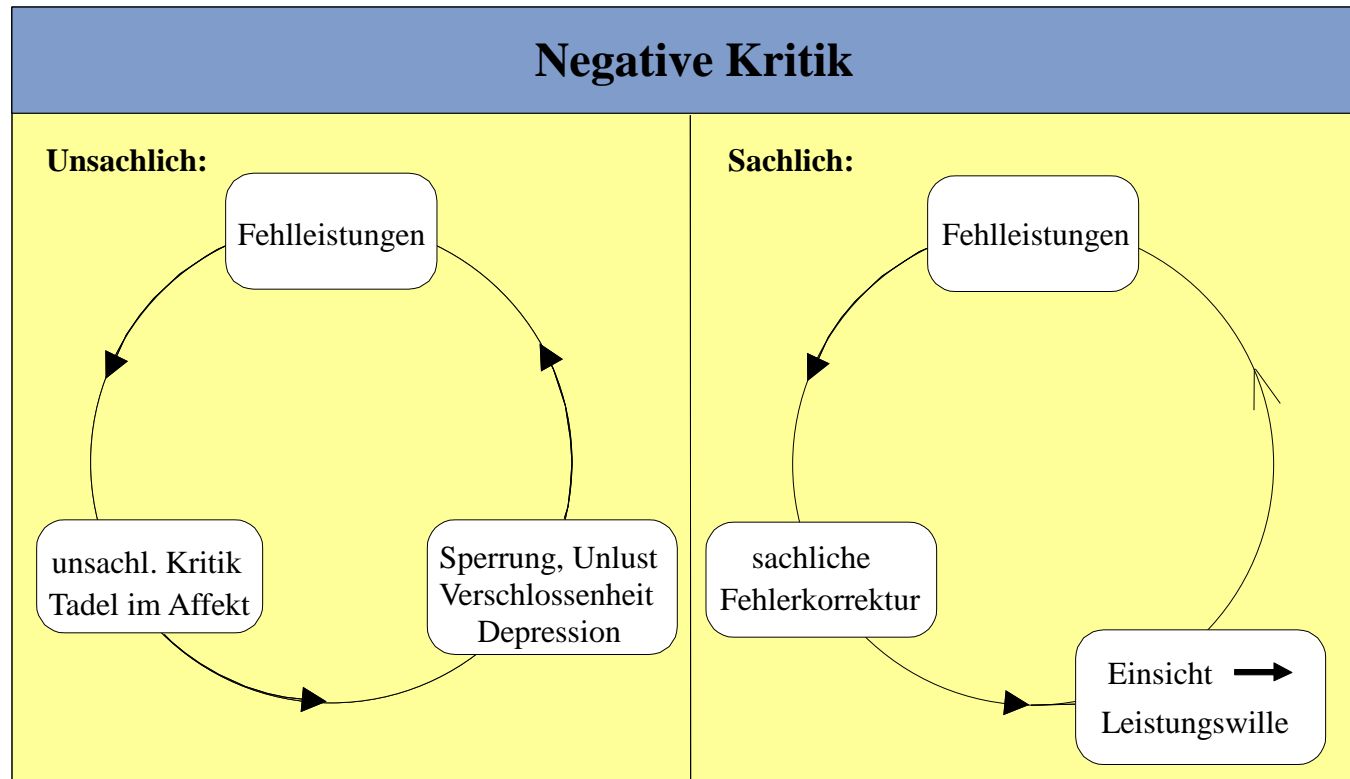



## Konfliktsteuerung

- Konflikte entstehen überall dort, wo mehrere Menschen zusammen sind. Dies gilt ebenso für Unternehmen und die in ihnen arbeitenden Menschen.
- Sie sind alltägliche Ereignisse und können nicht von vorneherein ausgeschlossen werden.
- Konflikte sind nicht nur unvermeidlich, sondern auch notwendig und sinnvoll, um Stillstand zu vermeiden und Veränderung, Weiterentwicklung und Fortschritt herbeizuführen.

## Der Konfliktprozess

- **Latente Konflikte** sind objektiv vorhanden, werden aber von den Beteiligten noch nicht wahrgenommen.
- Sind sich die Beteiligten ihrer Konflikte bewusst, unterdrücken sie aber dann, handelt es sich um **aktuelle Konflikte**.
- Werden sie ausgetragen, bezeichnet man sie als **manifestierte Konflikte**.





## Die Konfliktarten

- **Interpersonelle Konflikte** entstehen zwischen verschiedenen Personen, Gruppen oder Organisationseinheiten. Ihre Hauptursachen sind unerfüllte Bedürfnisse, unklare Abgrenzung der Aufgaben und Befugnisse, unzureichende Übereinstimmung der Erwartungen des Einzelnen mit den Rollenerwartungen in der Organisation, mangelnde Information und mangelhafte oder fehlerhafte Kommunikation.
- **Intrapersonelle Konflikte** liegen dann vor, wenn in einer bestimmten Situation innerhalb einer Person gegensätzliche Motivationen, Entscheidungszwänge oder Verhaltenserwartungen aufeinandertreffen. Sie können vielfach der Auslöser für interpersonelle Konflikte im Unternehmen sein.
  - Als **Beispiel** für intrapersonelle Konflikte können Ziel- oder Motivkonflikte genannt werden, bei denen gleichzeitig verschiedene, nicht miteinander zu vereinbarende Bedürfnisse auftreten. Muss sich eine Person je nach vorliegender Situation für eine von zwei möglichen Alternativen entscheiden, können entsprechend der Entscheidungsform drei verschiedene Konfliktarten auftreten:

S. 463 f.



(Fortsetzung)

- **Der Appetenz-Appetenz-Konflikt:** Von zwei valenten Möglichkeiten kann nur eine erfüllt werden, d.h. die Person muss den bestehenden Konflikt durch eine intrapersonelle Entscheidung zugunsten des einen oder des anderen Vorteils lösen.  
Beispiel: Eine Person muss sich entscheiden, ob sie weiterhin im Innendienst tätig sein will (Kontakte) oder ob sie die höher dotierte Stellung im Außendienst (Geld, Autonomie) übernehmen will.
- **Der Appetenz-Aversions-Konflikt:** Hier ist die Entscheidung für eine bestimmte angestrebte Alternative zugleich mit einem nachteiligen Aspekt verbunden. Beispiel: Einer Person bietet sich die Möglichkeit, den Verdienst zu erhöhen, allerdings ist dies nur in Verbindung mit Schichtarbeit möglich.
- **Der Aversions-Aversions-Konflikt:** Die Person muss sich für eine von zwei unangenehmen, jedoch unumgänglichen Möglichkeiten entscheiden. Beispiel: Ein Mitarbeiter steht vor der Wahl, sich entweder mit einer geringer dotierten Position zufrieden zu geben (Geld, Status) oder das Unternehmen zu verlassen (Existenz, Sicherheit).

## Kommunikation im Führungsprozess

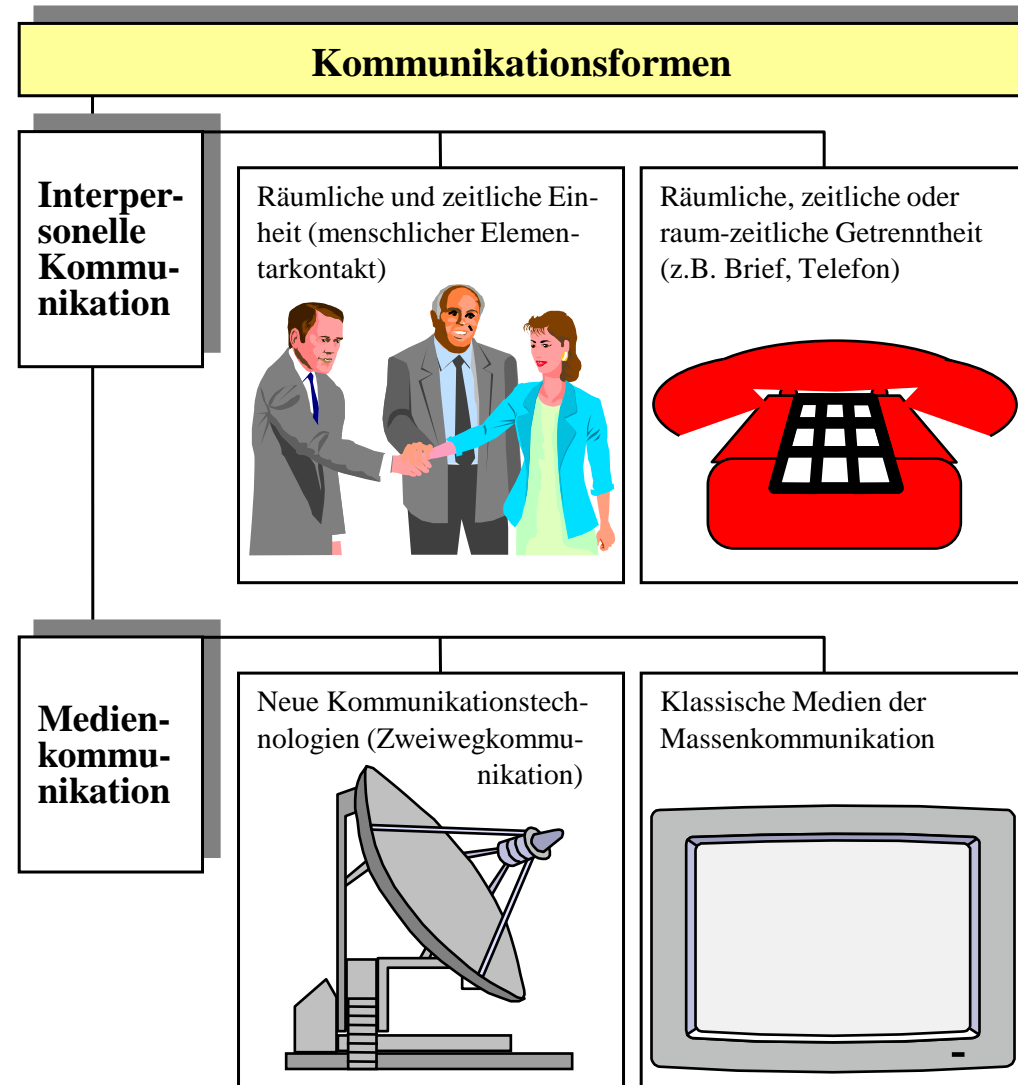

S. 467 Abb. 55



## Kommunikationsarten

Bei jeder Art der Kommunikation haben wir es mit einem Sender zu tun, der eine "Botschaft" (Nachrichten, Informationen) an einen Empfänger richtet und sich dabei zur Verschlüsselung seiner

**Ideen, Wünsche, Gefühle, Einstellungen, Absichten, Erwartungen usw.**

eines Mediums bedient und dieses einem sinnlich wahrnehmbaren Kanal zur Übertragung anvertraut.

## Asymmetrische Kommunikation

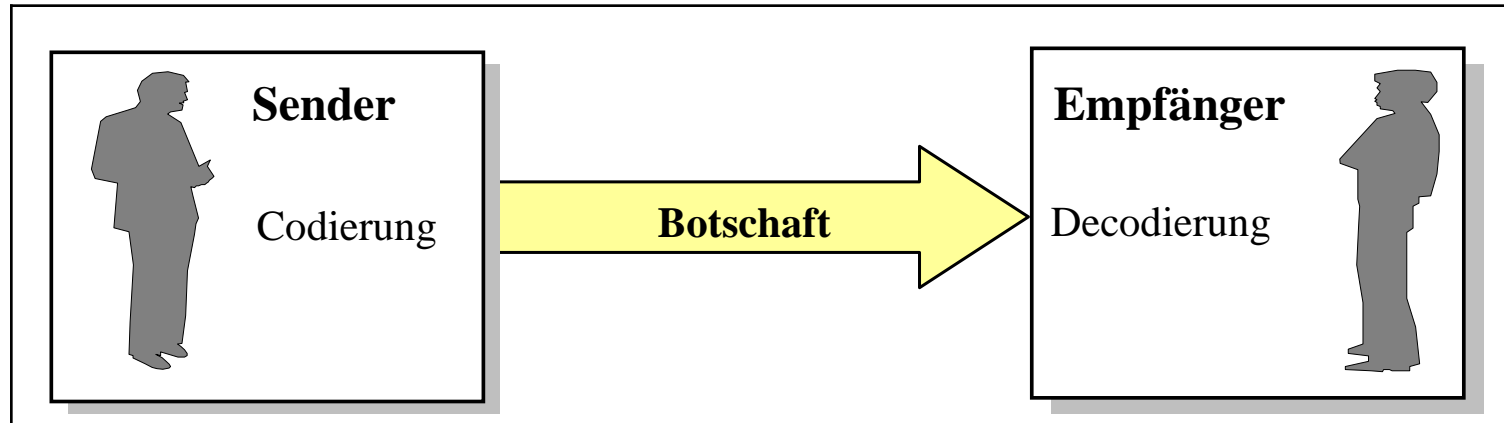

## Symmetrische Kommunikation

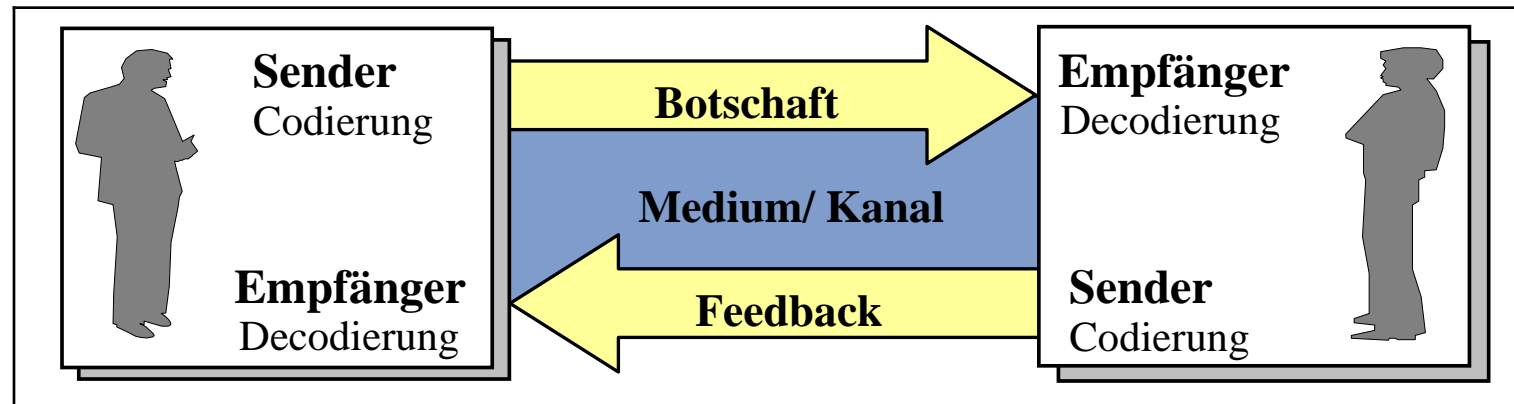

S. 468 Abb. 56, 57

Jung, Hans: Personalwirtschaft, 9. Aufl., München 2010.

© Oldenbourg Wissenschaftsverlag

## Das Vier-Seiten-Modell der Kommunikation

Das Vier-Seiten-Modell der Kommunikation als das bekannteste Kommunikationsmodell wurde von **Schulz** von **Thun** entwickelt. Kernaussage des Modells ist, dass jede Nachricht stets vier Seiten beinhaltet, die gleich wichtig sind.

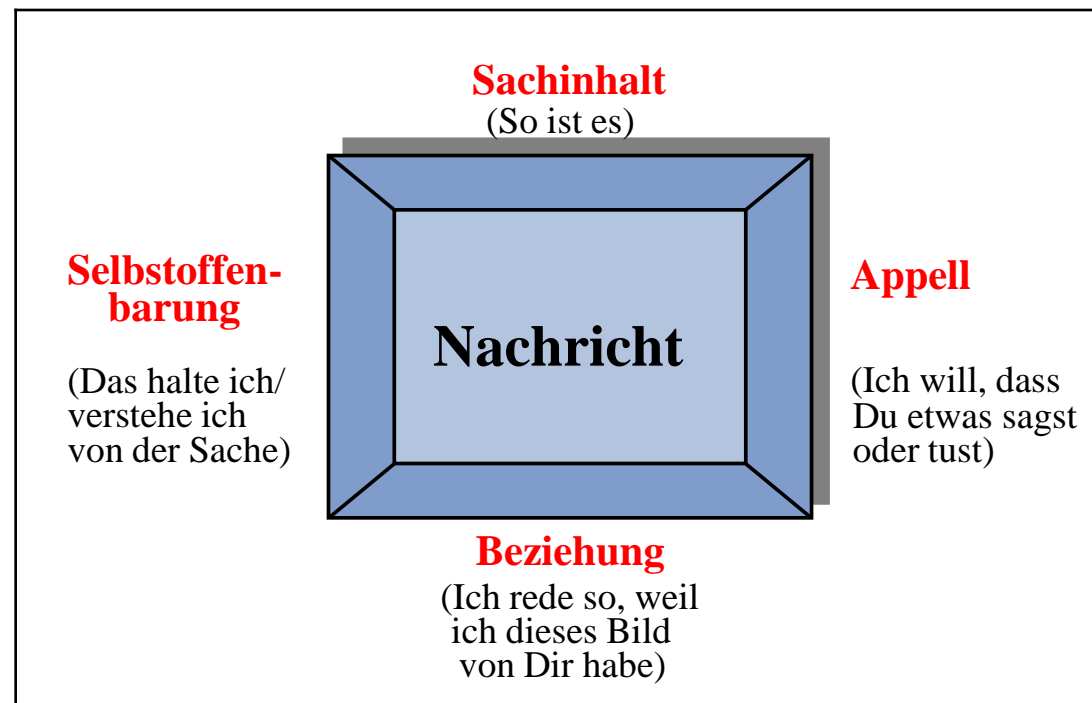

S. 470 Abb. 58

(in Anlehnung an: Schulz von Thun, F.: Miteinander reden, Bd. 1: Störungen und Klärungen, Reinbek bei Hamburg 1994, S. 14)

Jung, Hans: Personalwirtschaft, 9. Aufl., München 2010.

© Oldenbourg Wissenschaftsverlag

## Gegenüberstellung von gesendeter und empfangener Nachrichten

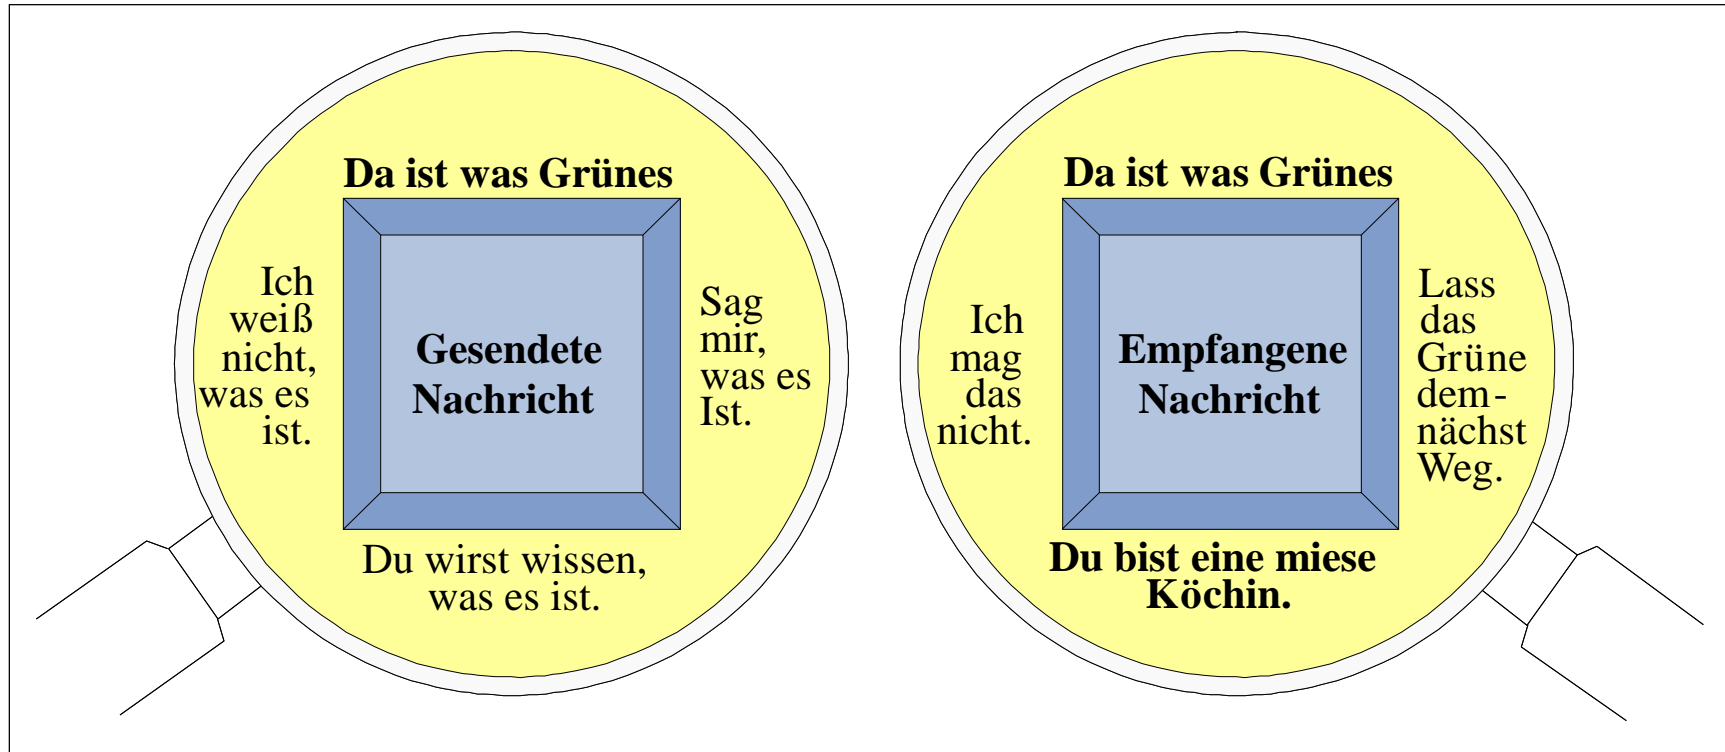

S. 472 Abb. 59

(in Anlehnung an: Schulz von Thun, F.: Miteinander reden, Bd. 1: Störungen und Klärungen, Reinbek bei Hamburg 1994, S. 62 f.)

Jung, Hans: Personalwirtschaft, 9. Aufl., München 2010.

© Oldenbourg Wissenschaftsverlag

## Einflussfaktoren der Kommunikation

In einer Gruppe bestehen zwei Kommunikationsebenen:

- **Die Arbeits- oder Sachebene**
- **Die emotionale oder Gefühlsebene**

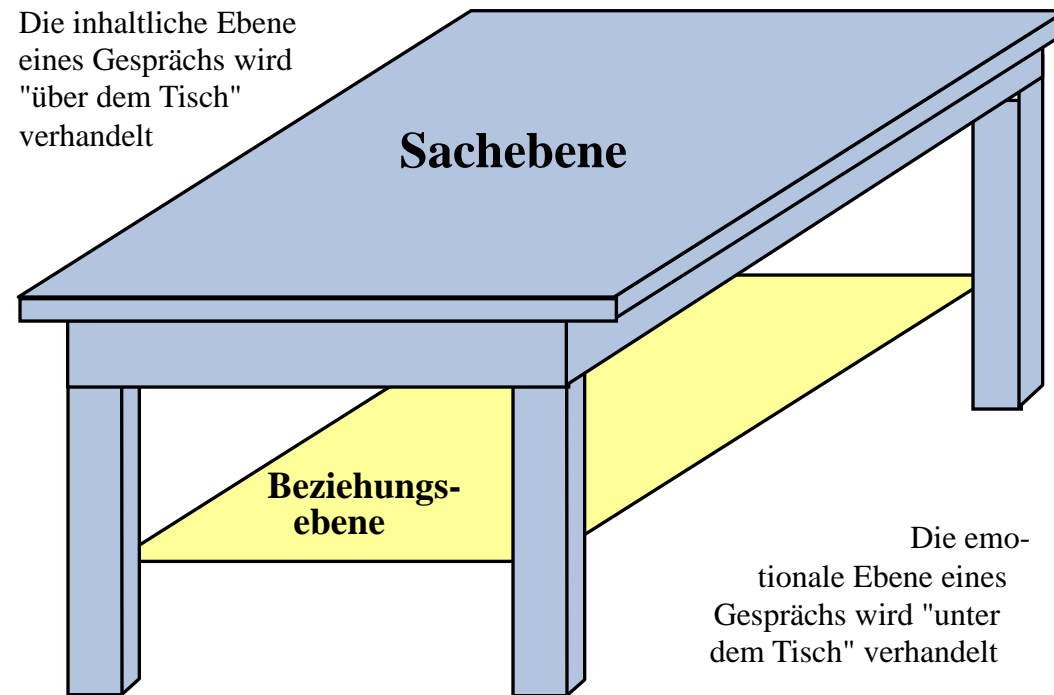

S. 473 Abb. 60



## Modell der Kommunikationsstörungen

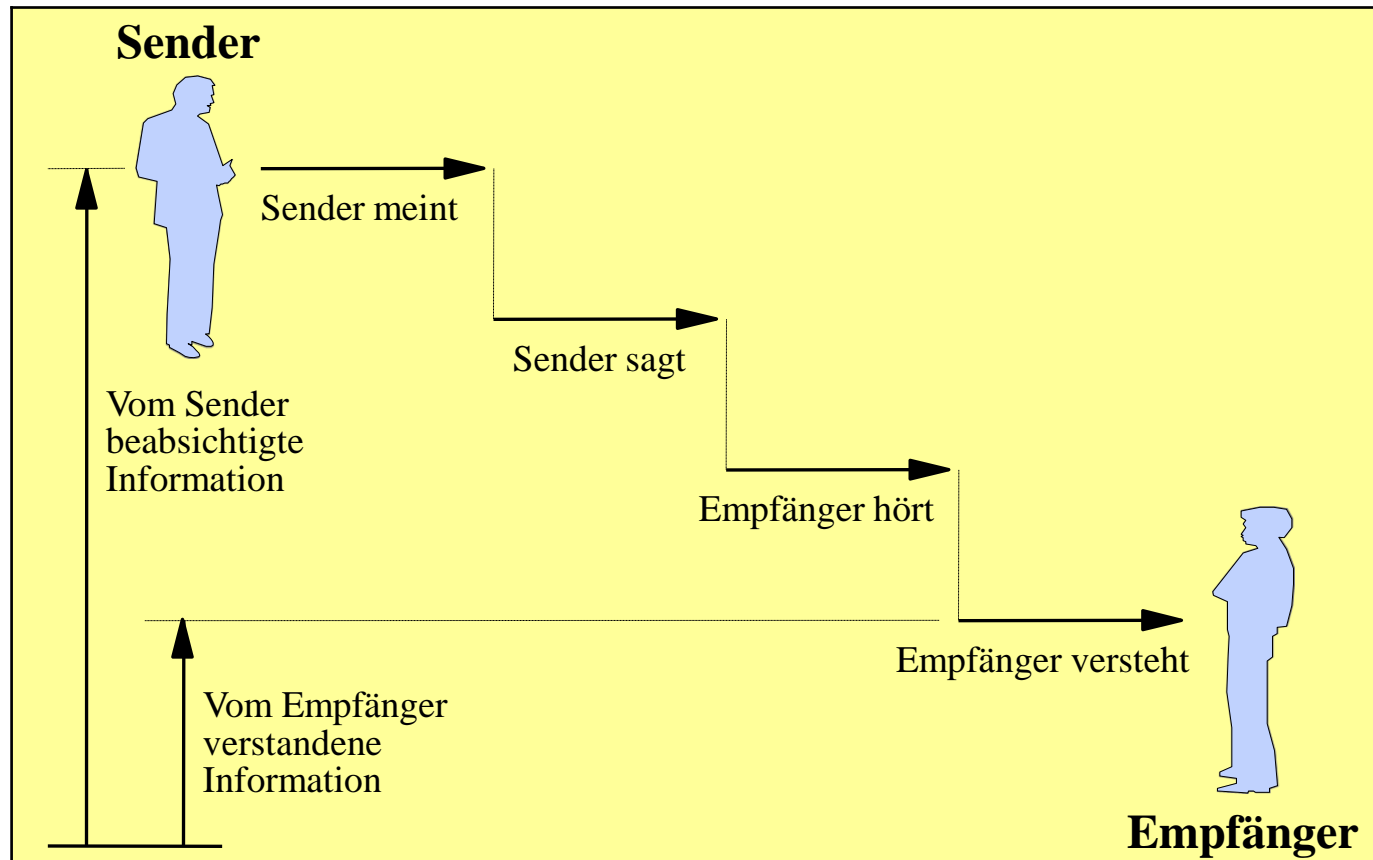

S. 474 Abb. 61

Jung, Hans: Personalwirtschaft, 9. Aufl., München 2010.

© Oldenbourg Wissenschaftsverlag

## Möglichkeiten zur Kommunikationsverbesserung

### Verbesserung durch Feedback

Die wesentliche Funktion des Feedback besteht in der Aufdeckung von zwei Diskrepanzen für den Feedbackpartner:

- Seine Selbstwahrnehmung und die Fremdwahrnehmung weichen voneinander ab, weil sich die Selbstwahrnehmung z.B. zu sehr am eigenen Wunsch- oder Idealbild orientiert.
- Die realen Verhaltensauswirkungen entsprechen nicht den beabsichtigten Verhaltenszielen.

## Vier Regeln zum Feedback

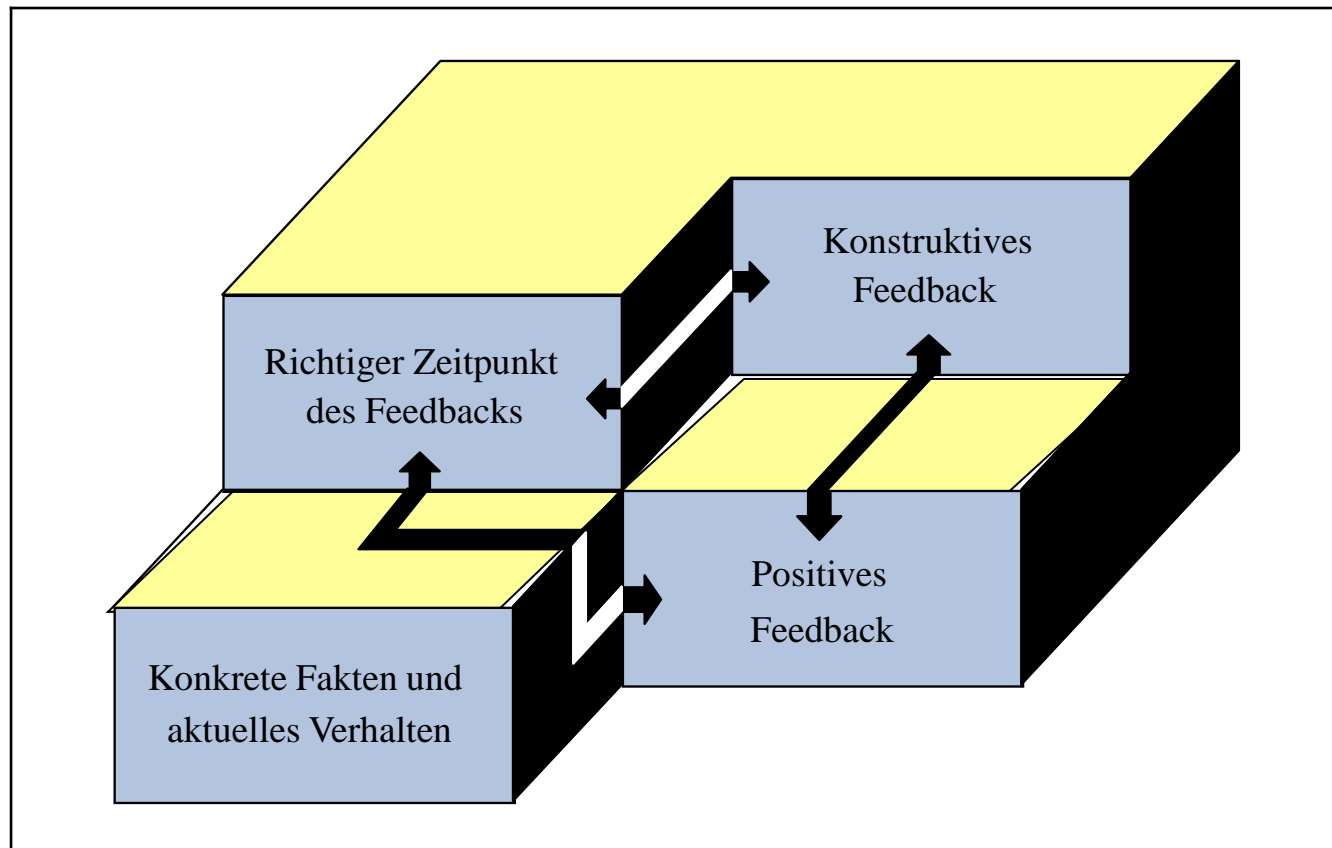

S. 476 Abb. 62

Jung, Hans: Personalwirtschaft, 9. Aufl., München 2010.

© Oldenbourg Wissenschaftsverlag



## Gespräche als Mittel der Mitarbeiterkommunikation

### Das Mitarbeitergespräch (Vorgehensweise)

1. Das Gespräch sollte möglichst getrennt vom Arbeitsplatz und stets unter vier Augen durchgeführt werden.
2. Bei Gesprächsbeginn sollte zunächst der Kontakt zum Mitarbeiter hergestellt und eine entspannte Atmosphäre geschaffen werden.
3. Das Gesprächsthema muss gekennzeichnet, Inhalt und Sinn herausgearbeitet werden.
4. Der Mitarbeiter soll zum selbständigen Denken angeregt werden und möglichst viele seiner persönlichen Erfahrungen einbringen können.
5. Frühzeitiges Bewerten und Einbringen von Kritik sollte vermieden werden, um den Mitarbeiter nicht zu demotivieren.
6. Die eigene Meinung nicht an den Gesprächsbeginn stellen. Ebenso sollte nicht Stellung genommen werden, bevor der Mitarbeiter ausgesprochen hat.
7. Am Ende des Gesprächs eine Ergebniszusammenfassung durchführen.

S. 478 Abb. 63

Jung, Hans: Personalwirtschaft, 9. Aufl., München 2010.

© Oldenbourg Wissenschaftsverlag



## Anlässe für ein Mitarbeitergespräch

- Ein neuer Mitarbeiter wird eingeführt.
- Ein Mitarbeiter wird beurteilt.
- Ein Mitarbeiter soll befördert werden.
- Ein Mitarbeiter wird kritisiert.
- Ein Mitarbeiter wird umgesetzt.
- Ein Mitarbeiter kündigt.



Verhaltensmuster und Führungsmaßnahmen

| Verhaltensmuster     | zeichnet sich aus durch                                               | Führungsmaßnahmen                                                          |
|----------------------|-----------------------------------------------------------------------|----------------------------------------------------------------------------|
| Der Bösertige        | Fühlt sich schnell angegriffen.                                       | Persönliches weglassen und sachlich bleiben.                               |
| Der Alleswiser       | Weiß alles und jedes besser.                                          | Ihn bitten, auch die andere Seite zu sehen. Nicht zu sehr loben.           |
| Der Schwätzer        | Redet häufig ohne Ende.                                               | Höflich unterbrechen und Beitrag zusammenfassen.                           |
| Der Schüchterne      | Traut sich nicht, seine Meinung zu sagen.                             | Mit zunächst einfachen Fragen zu Äußerungen motivieren. Häufiger loben.    |
| Der Widerspenstige   | Hat häufig Bedenken, ist gegenüber Neuem unaufgeschlossen.            | Zu konkreten Vorschlägen auffordern.                                       |
| Der Desinteressierte | Beteiligt sich so gut wie nicht.                                      | Ihn nach seiner Meinung fragen und das Gefühl vermitteln, wichtig zu sein. |
| Der Hohnäsige        | Beteiligt sich kaum, kritisiert aber hinterher das Gesprächsergebnis. | Beim Gespräch sich festlegen lassen.                                       |
| Der Vorsichtige      | Legt sich nicht gern fest.                                            | Ihn bitten, seine Meinung klar darzulegen.                                 |
| Der Positive         | Ist ein guter Gesprächspartner und sucht gemeinsam nach Lösungen.     | Ok.                                                                        |

S. 479 Abb. 64



Checkliste zur  
Gesprächsvorbereitung

|                            |                                                                                                                                      |
|----------------------------|--------------------------------------------------------------------------------------------------------------------------------------|
| 1. Inhalt                  | Was will ich mit dem Gespräch erreichen?                                                                                             |
|                            | Was ist für mich <ul style="list-style-type: none"><li>- unumstößlich?</li><li>- diskussionsfähig?</li><li>- verhandelbar?</li></ul> |
|                            | Wo sehe ich inhaltlich/ emotional die größten Schwierigkeiten?                                                                       |
| 2. Umstände                | Raum vorbereiten                                                                                                                     |
|                            | Störungen ausschalten                                                                                                                |
|                            | Gesprächszeit festlegen                                                                                                              |
| 3. Einstellung             | Ich will verstehen, was der andere mir sagt                                                                                          |
|                            | Ich will auf Angriffe/ Konter verzichten                                                                                             |
|                            | Ich will ohne Vorurteile ins Gespräch gehen                                                                                          |
| 4. Gesprächs-<br>eröffnung | Dem Partner zuwenden, Blickkontakt herstellen                                                                                        |
|                            | Anlass, Dauer und Ziel des Gesprächs nennen bzw. vereinbaren.                                                                        |
| 5. Gesprächs-<br>führung   | Zuhören, Sicht des Partners erfragen                                                                                                 |
|                            | Gemeinsames Ordnen der Informationen                                                                                                 |
|                            | Prioritäten setzen, bewerten, gewichten                                                                                              |
|                            | Gemeinsam Lösung festlegen                                                                                                           |
|                            | Kontrollzeitraum festlegen                                                                                                           |

S. 480 Abb. 65



Gesprächsführung

| Nichtdirektive Gesprächsführung                                                                                                                                                                                                                                                                                                                          |                                                                                                                                                                                                                                                                       |
|----------------------------------------------------------------------------------------------------------------------------------------------------------------------------------------------------------------------------------------------------------------------------------------------------------------------------------------------------------|-----------------------------------------------------------------------------------------------------------------------------------------------------------------------------------------------------------------------------------------------------------------------|
| Vorteile                                                                                                                                                                                                                                                                                                                                                 | Nachteile                                                                                                                                                                                                                                                             |
| <ul style="list-style-type: none"><li>• Der Mitarbeiter ist aktiver und redefreudiger, er wird "aus der Reserve gelockt".</li><li>• Er ist zufriedener, weil er sich aussprechen und seine Meinung offen äußern kann.</li><li>• Er steht nicht unter Zeitdruck und kann besser mitdenken.</li><li>• Der Vorgesetzte erhält mehr Informationen.</li></ul> | <ul style="list-style-type: none"><li>• Das Gespräch kann länger dauern und schneller ins Unwichtige abgleiten.</li><li>• Der Gesprächspartner erkennt nicht, was man von ihm will.</li></ul> <p>Es entsteht dann der Eindruck von Unsicherheit des Vorgesetzten.</p> |

S. 481 Abb. 66



## Die Besprechung

- In der **Arbeitsbesprechung** gibt der Vorgesetzte selbst Informationen und vermittelt eigene Vorkenntnisse. Das Gruppengespräch soll sicherstellen, dass die Information ankommt und verarbeitet werden kann.
- Bei der **Entscheidungsvorbereitung** geht es um Probleme, die nur gemeinschaftlich gelöst werden können und bei denen das Vorwissen des Vorgesetzten nicht mehr ausreicht. Aus der Sicht der Arbeitserfahrung können und sollen die Mitarbeiter beitragen.
- Bei der **Problemerkennung** hält sich der Vorgesetzte zurück. Er stimuliert und fordert zu möglichst vielen Beiträgen auf. Er kritisiert und korrigiert Äußerungen möglichst nicht.

## Anteil der Wortbeiträge während der Gesprächsführung

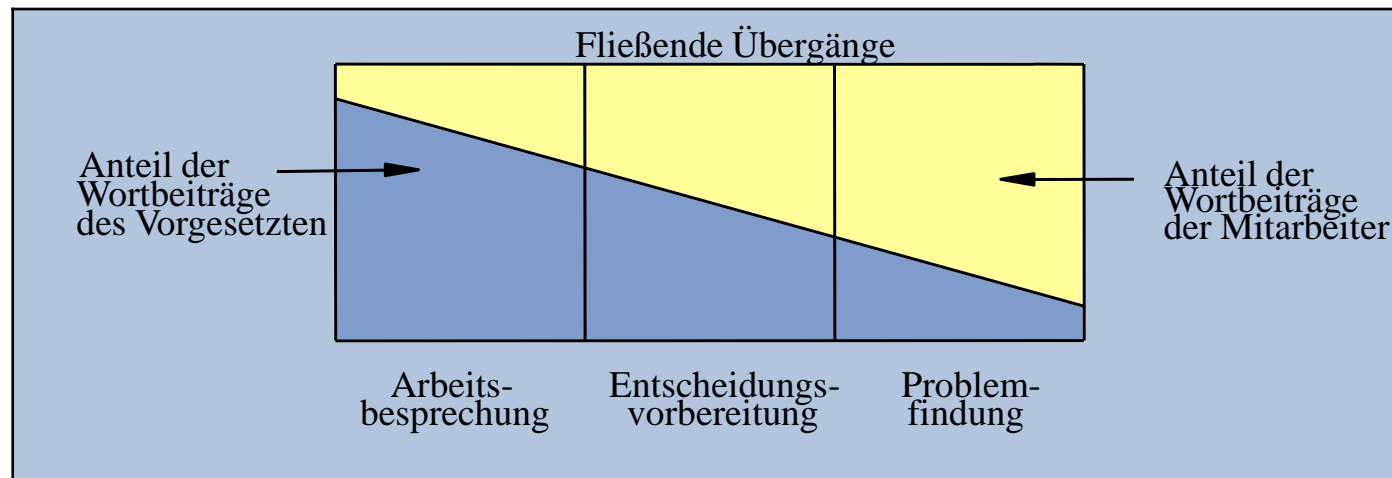

S. 482 Abb. 67

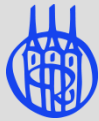

| Organisation und Rahmenbedingungen der Besprechung |                                                                                                                                                                        |                               |                                                                                                      |
|----------------------------------------------------|------------------------------------------------------------------------------------------------------------------------------------------------------------------------|-------------------------------|------------------------------------------------------------------------------------------------------|
| <b>Raum</b>                                        | ausreichende Größe<br>Gute Belüftung<br>Ruhige Lage                                                                                                                    | <b>Termin</b>                 | Günstiger Zeitpunkt<br>Rechtzeitige Bekanntgabe<br>Möglichst regelmäßig                              |
| <b>Sitzordnung</b>                                 | Jeder muss sich gleich gut<br>sehen können<br>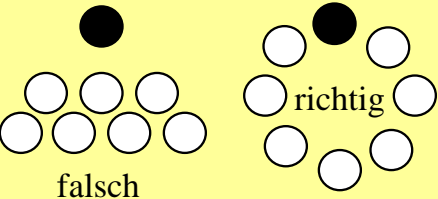<br>falsch                      richtig | <b>Zeitstruktur</b>           | Dauer festlegen (realistisch<br>aber nicht zu lang)<br>Pausen vorsehen<br>Pünktlich beginnen / enden |
| <b>Hilfsmittel /<br/>Medien</b>                    | Flip Chart, Metaplan,<br>Overhead-Projektor<br>Dia-, Videogerät, Tafel                                                                                                 | <b>Störungsfrei-<br/>heit</b> | Keine Telefonate<br>Keine Besuche                                                                    |
|                                                    |                                                                                                                                                                        | <b>Einladung</b>              | Schriftlich, mit Angabe<br>von Inhalt und Dauer                                                      |

S. 482 Abb. 68



## Abfolgeplan bei der Durchführung von Besprechungen

- 1. Erledigungsscheck:** Zu Beginn des Gespräches ist eine "Standortbestimmung" sinnvoll, bei der die aktuelle Situation dargelegt wird und ein Statusbericht bezüglich früherer Vereinbarungen erfolgt.
- 2. Protokollführung:** Es wird geklärt, wer das Protokoll anfertigt und welchen Inhalt es haben soll (z.B. auf was man sich geeinigt hat und wer bis wann was zu tun hat)
- 3. Inhaltsbestimmung:** Die Inhalte der Tagesordnung werden genau festgelegt, ggf. geprüft und ergänzt oder korrigiert.
- 4. Umfangsbestimmung:** Es wird exakt festgelegt bzw. vereinbart, in welchem Umfang die einzelnen Punkte behandelt werden, z.B.
  - ob nur ein Statement abgegeben werden soll,
  - die Meinung aller Anwesenden gehört werden soll,
  - eine Diskussion stattfinden soll,
  - oder ob eine gemeinsame Entscheidung gefällt werden soll.
- 5. Prioritäten:** Es müssen klare Prioritäten gesetzt werden, die auch die Reihenfolge der Tagesordnung bestimmen (Dramaturgie).



## Kommunikatives Gruppenmanagement

Gruppenbildung ist im Unternehmen immer dann erforderlich, wenn die zu bewältigende Aufgabe von ihrer Quantität oder Qualität her von einzelnen nicht mehr erfüllt werden kann. Dies ist z.B. dann der Fall, wenn

- kreative Lösungen gefunden werden müssen,
- Kompetenzen, Erfahrungen und Informationen auf verschiedene Personen oder Gruppen verteilt sind,
- Entscheidungen von mehreren Personen voll getragen oder Aktionen von einer Gruppe vorbereitet und durchgeführt werden müssen.

Um die Leistungsfähigkeit einer solchen Gruppe zu gewährleisten bzw. zu optimieren, müssen verschiedene Dimensionen der Zusammenarbeit berücksichtigt werden:

- **Inhaltliche Dimension**
- **Methodische Dimension**
- **Interaktionelle Dimension**

## Kommunikationsnetze in der Gruppe

Die Kommunikationsprozesse in einer Gruppe werden durch deren Strukturen beeinflusst. Die Kommunikationsstruktur innerhalb einer überschaubaren Gruppe aus mehreren Personen weist differenzierte Formen auf. Hierbei dominieren in der Regel die vier dargestellten Kommunikationsnetze:

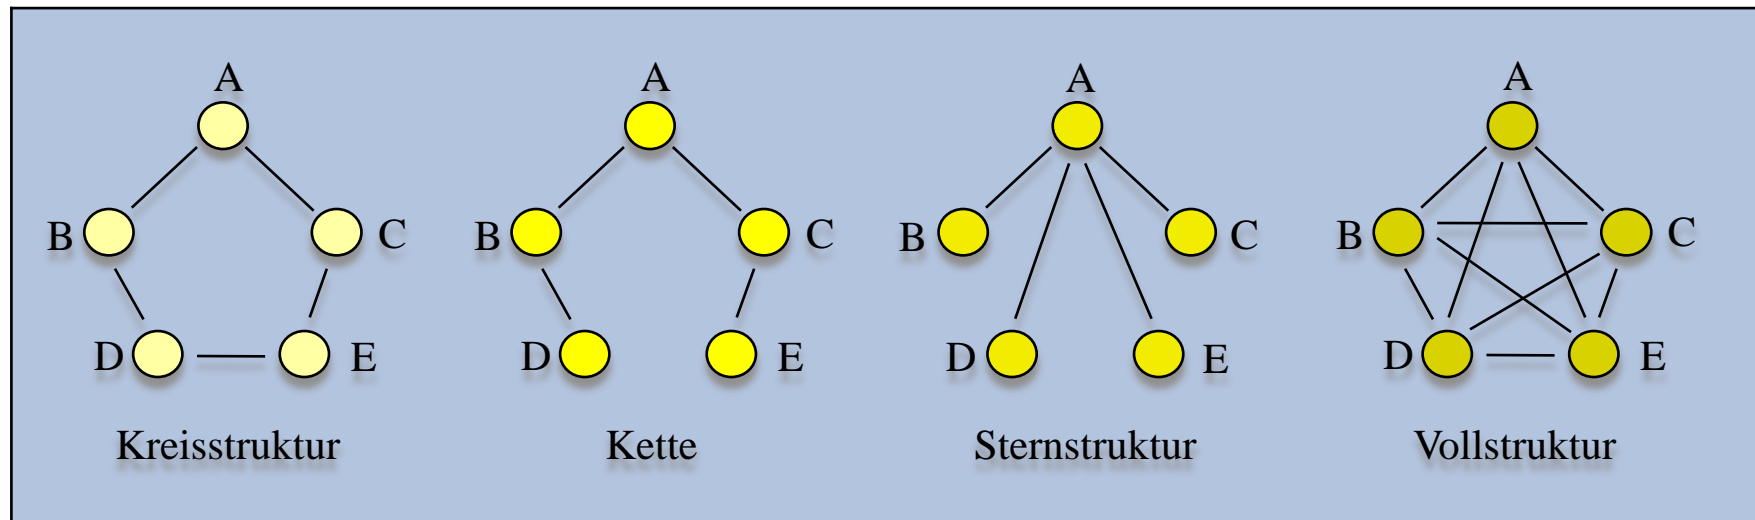

## Problemlösung im Gruppengespräch

Das Gruppengespräch gliedert sich in drei Elemente, die mit Prozedur, Inhalt und Interaktion bezeichnet werden.

Die Elemente bewirken, dass die Gruppe über einen bestimmten Zeitraum eine Entwicklung von der Problemerkennung über die Entscheidungsvorbereitung bis zur Zielfindung durchführt.

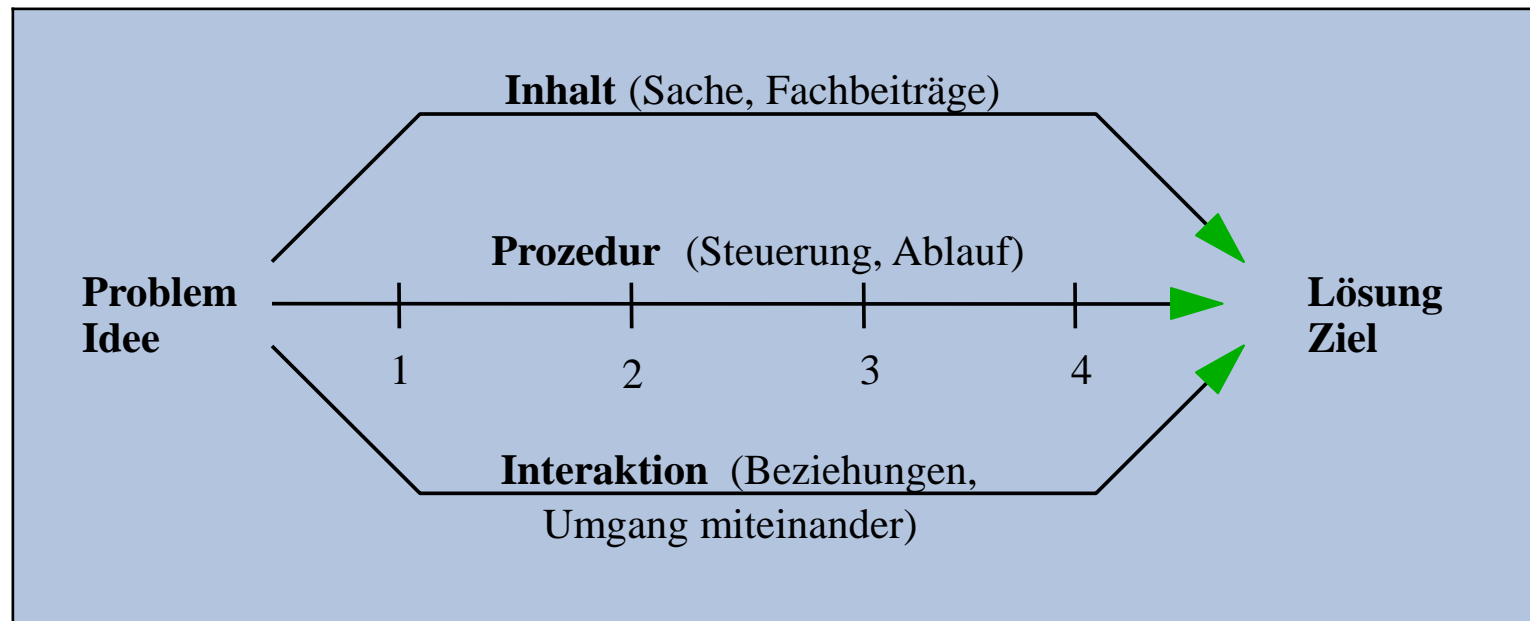

S. 485 Abb. 70

Jung, Hans: Personalwirtschaft, 9. Aufl., München 2010.

© Oldenbourg Wissenschaftsverlag



Die vier Phasen der Prozedur

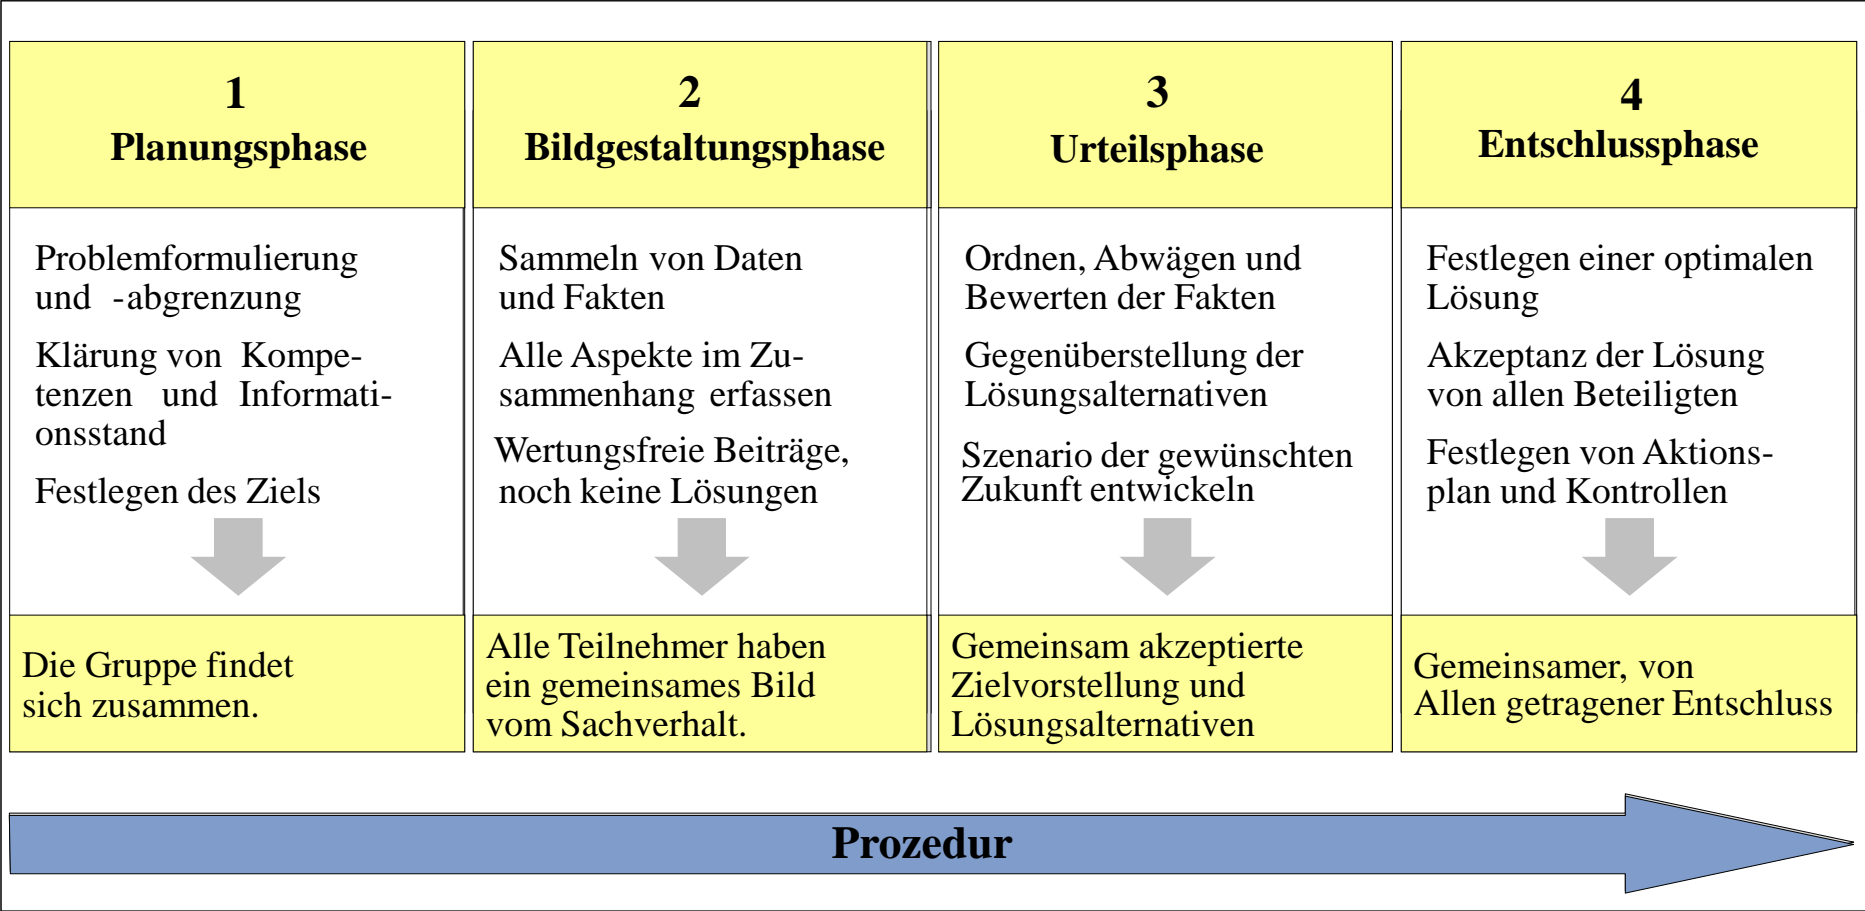

S. 486 Abb. 71

## Der Gruppenprozess (von der Gruppe zum Team)

Ein wesentlicher Aspekt des kommunikativen Gruppenmanagements ist der Entwicklungsprozess (Gruppenprozess), den jede Gruppe durchläuft.

Unter dem Gruppenprozess versteht man den Weg einer Gruppe zu ihrem Ziel im Wandel ihrer Beziehungen nach innen und nach außen.

### Einflussfaktoren:

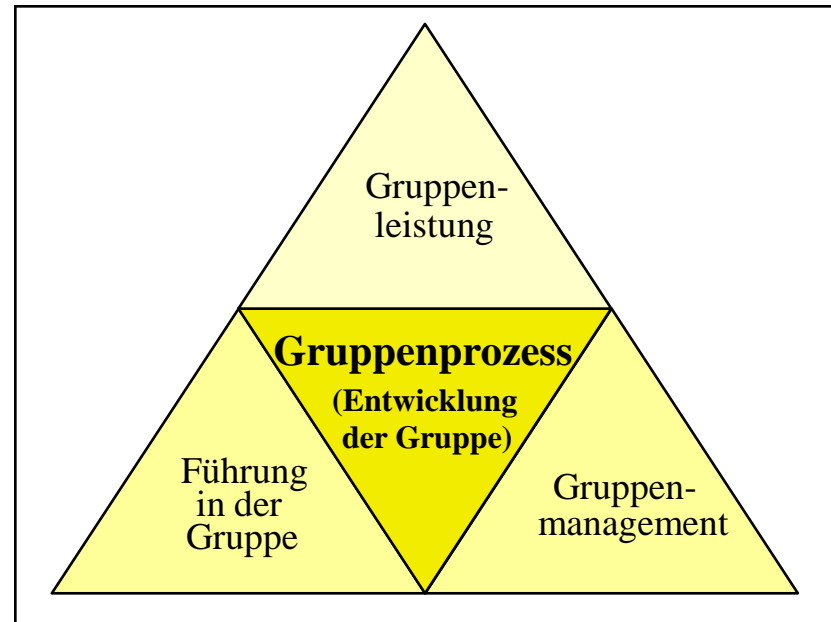

S. 487 Abb. 72



## Entwicklungsphasen im Team

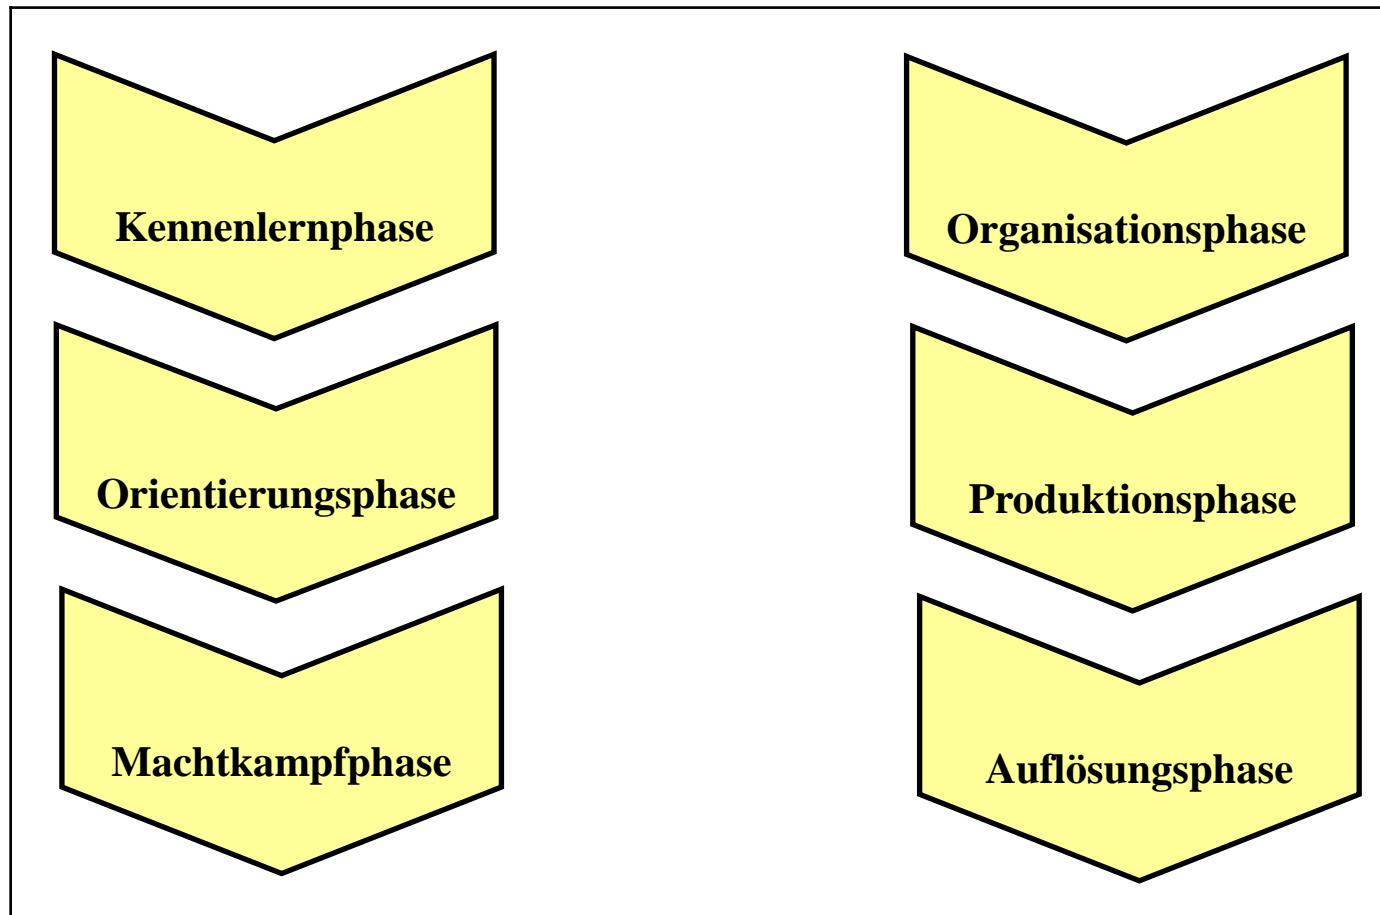

S. 488 Abb. 73

Quelle: Vgl. Henning, K./Marko, S.: Kommunikations- und Organisationsentwicklung, 2. Aufl., Aachen 1992, S. 76

Jung, Hans: Personalwirtschaft, 9. Aufl., München 2010.

© Oldenbourg Wissenschaftsverlag

## Selbst- und Fremdwahrnehmung im Gruppenprozess

### Grundmodell des Johari-Fenster

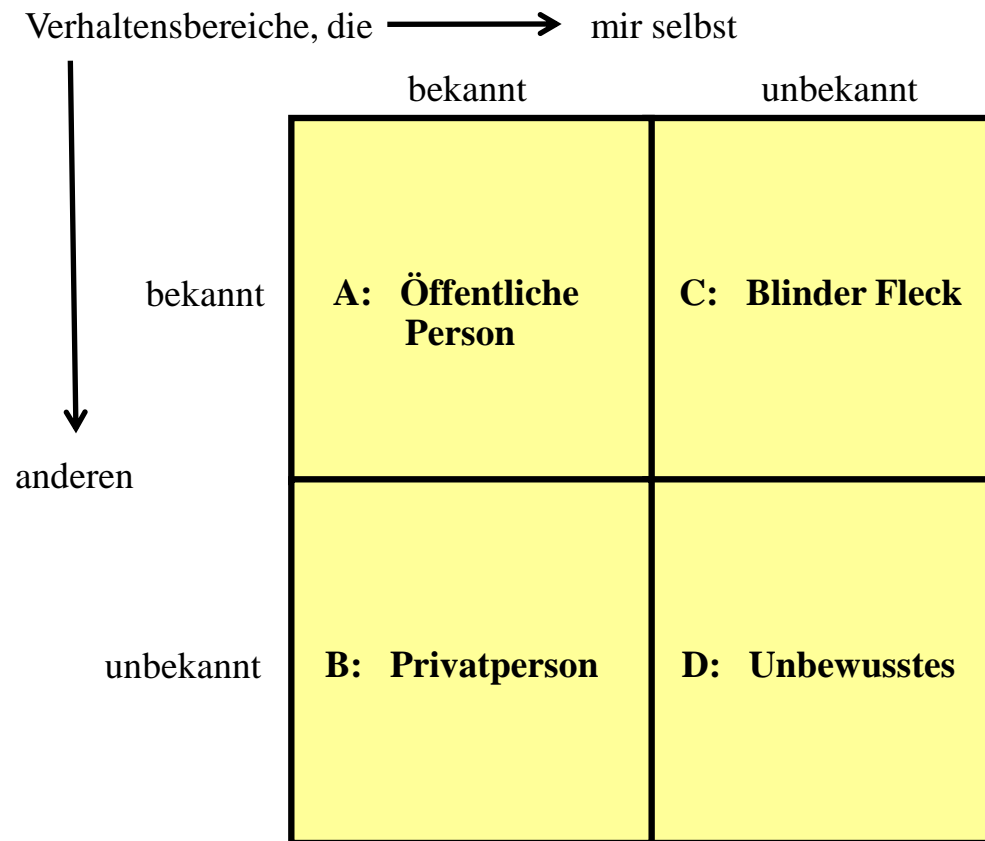

S. 489 Abb. 74

## Auswirkungen von Feedback

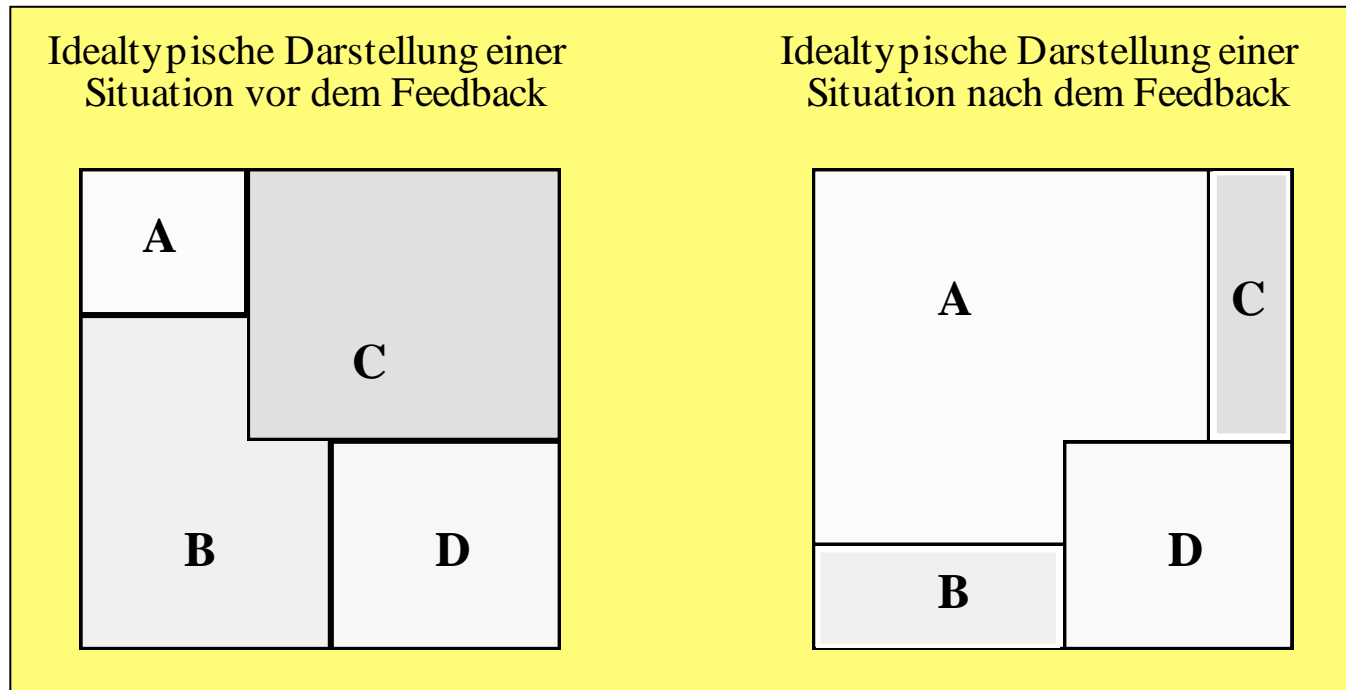

S. 490 Abb. 75

## Gruppenprobleme – Ursachen und Maßnahmen

### Vier Schritte zur Lösung von Gruppenproblemen

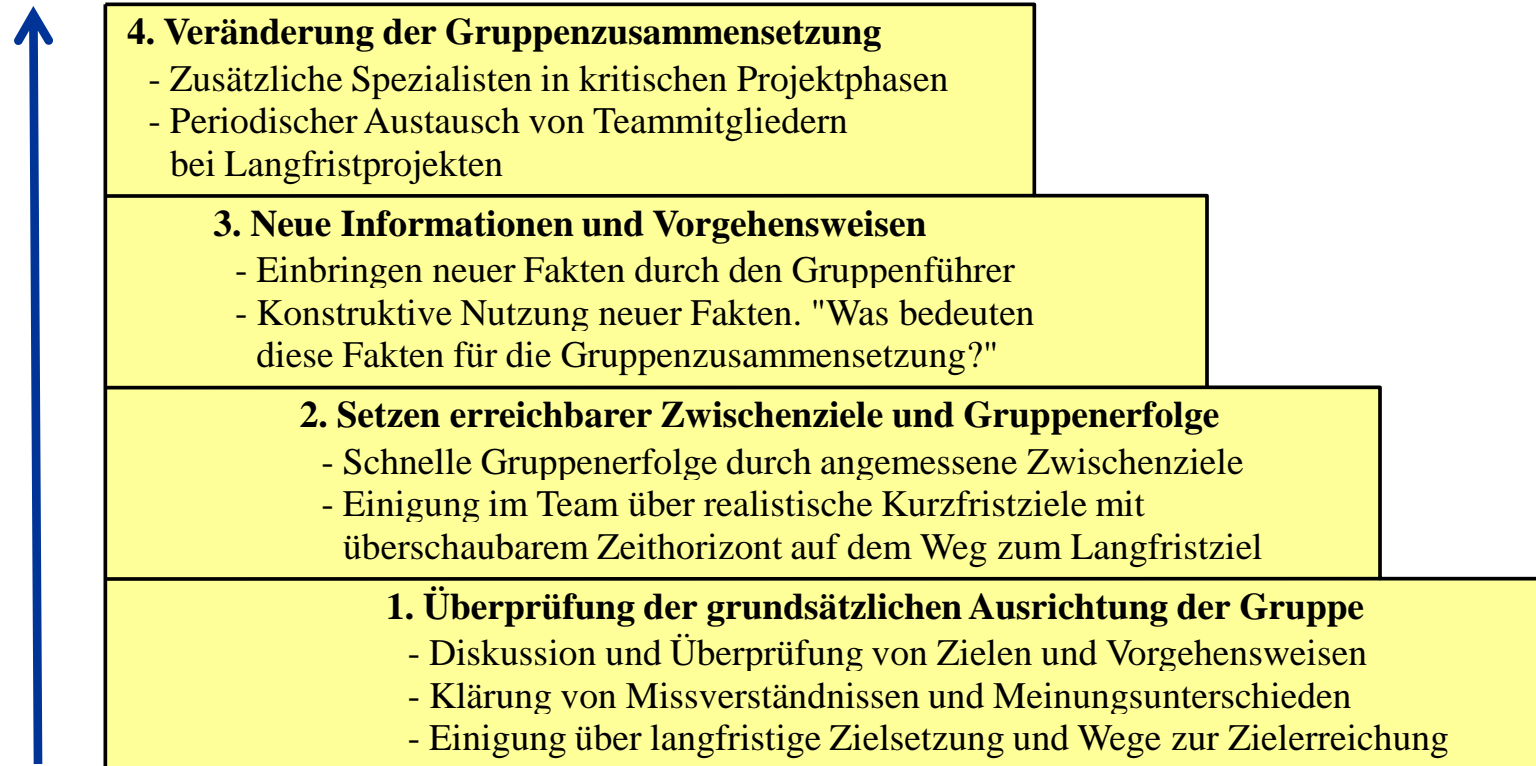

S. 492 Abb. 76



Moderation in Gruppen

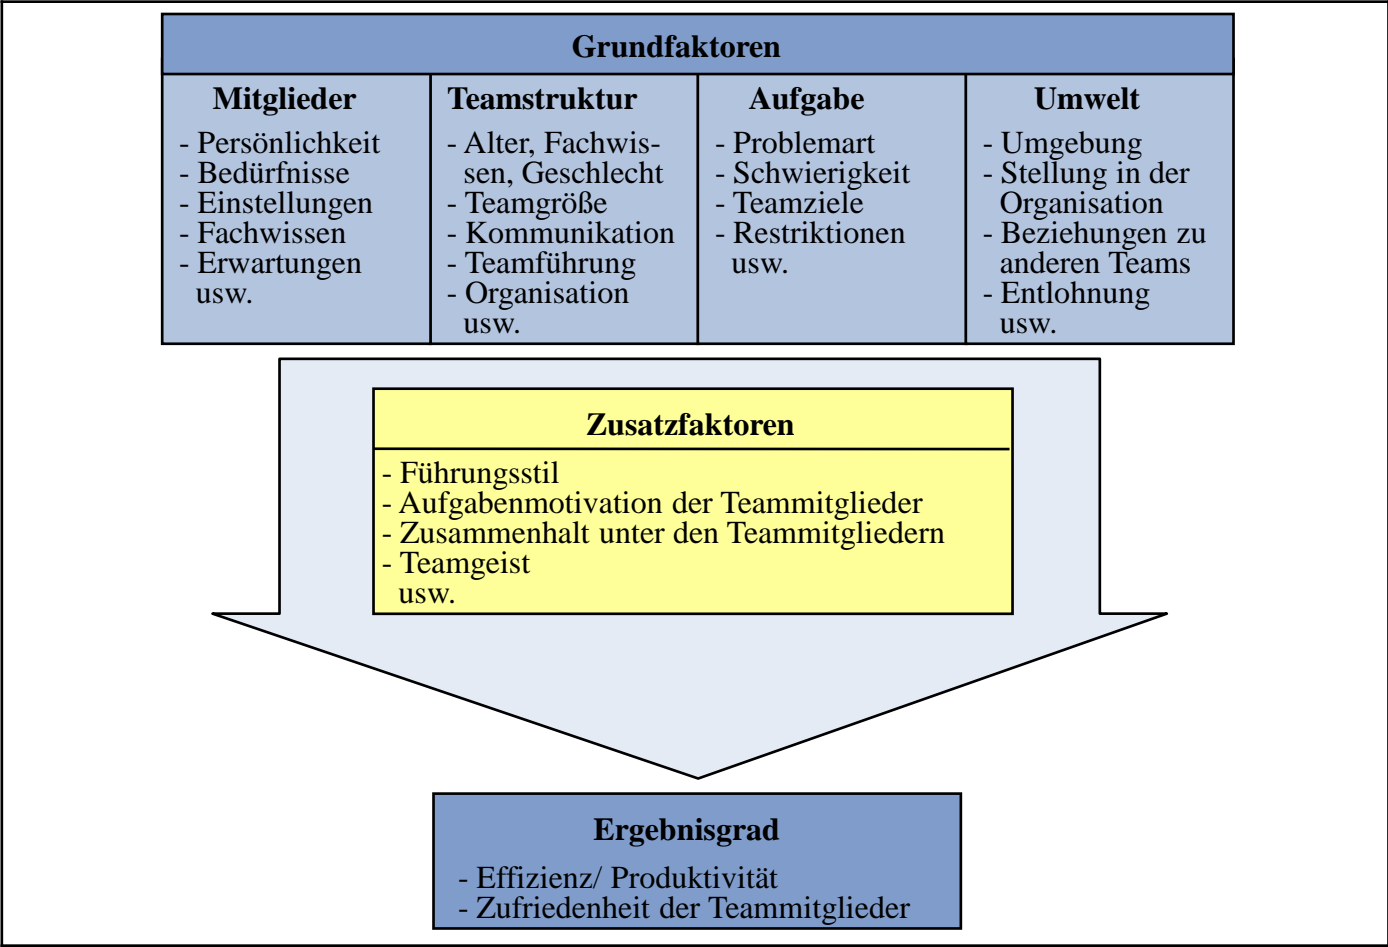

S. 493 Abb. 77



## Regeln zur erfolgreichen und effizienten Moderation:

- Diskussionsregeln bekannt geben und deren Einhaltung kontrollieren
- Sozialkonflikte bewusst machen und zur Versachlichung beitragen
- Teilnehmer zur Aktivität anregen, ohne selbst in den Mittelpunkt zu rücken
- Kreativität und ausgewogene Kommunikation fördern
- Entscheidungssituationen und Entscheidungszwänge herbeiführen
- Fragen stellen statt Antworten und Lösungen vorzugeben
- Bewertung und Lösungsfindung der Gruppe überlassen
- Ergebnisse dokumentieren und für Folgeaktivitäten motivieren

# Fragetechnik als wichtigstes Gestaltungselement im Diskussionsverlauf:

- Sie begrenzen oder erweitern, konkretisieren oder verallgemeinern eine Thematik
- Sie strukturieren und setzen Schwerpunkte
- Sie helfen, die Diskussion in eine bestimmte Richtung zu lenken

Fragestellungen müssen antwortorientiert sein. Das setzt die Kenntnis möglicher Antwortalternativen voraus.

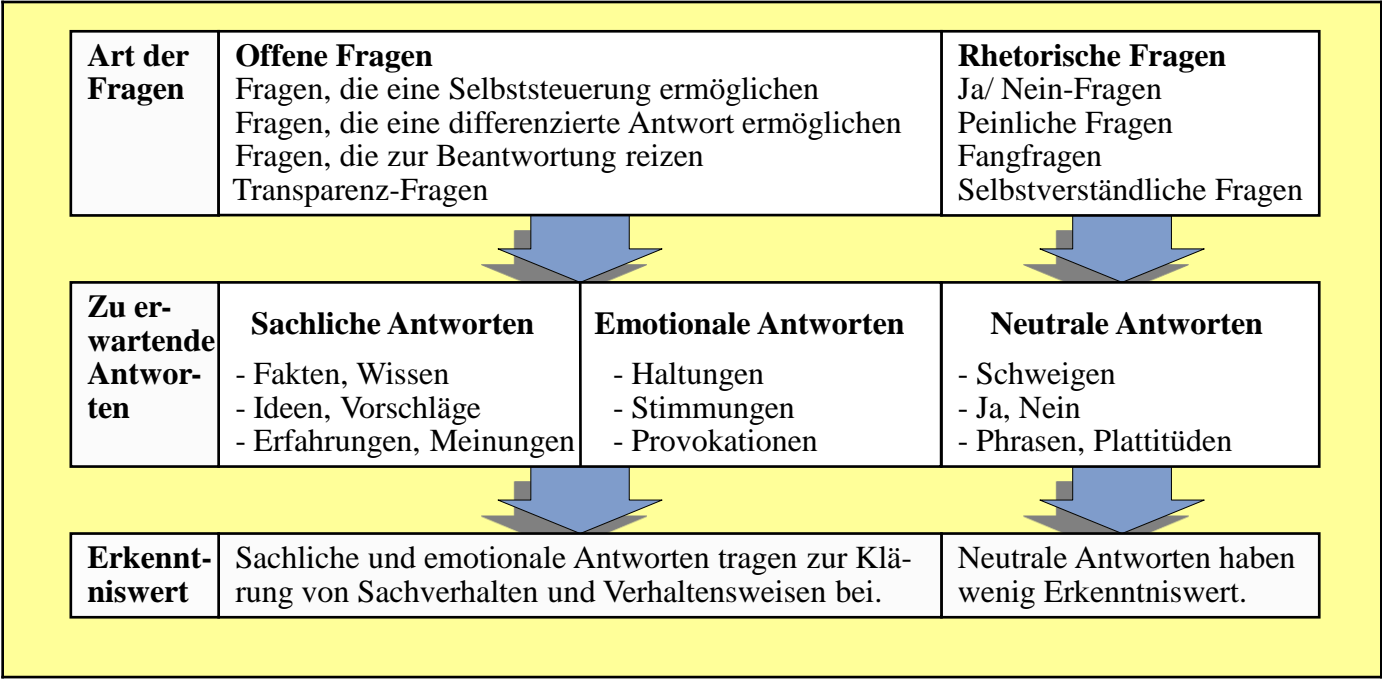

S. 494 Abb. 78



Interventionen bei der Gruppenmoderation

| Situation in Gruppen                             | Maßnahme                                                                                                                                                                                                                   |
|--------------------------------------------------|----------------------------------------------------------------------------------------------------------------------------------------------------------------------------------------------------------------------------|
| Monologe von Teilnehmern                         | <ul style="list-style-type: none"><li>- Karte mit Aufschrift „30 Sekunden“</li><li>- Transparenzfragen stellen</li></ul>                                                                                                   |
| Sachliche Meinungsunterschiede                   | <ul style="list-style-type: none"><li>- Transparenz nach Lern- oder Informationsbedarf</li><li>- Bestandsaufnahme von Wissen und Information</li><li>- Strategieentwicklung zur Deckung der Bedarfe</li></ul>              |
| Gegensätzliche Interessen                        | <ul style="list-style-type: none"><li>- Rollenspiel mit Interessenvertreter</li><li>- Interessenlage durch Kleingruppe darstellen lassen</li><li>- Pro- und Kontra Spiel</li><li>- Interesse der Gruppe abfragen</li></ul> |
| Persönliche Differenzen zwischen den Teilnehmern | <ul style="list-style-type: none"><li>- Zuordnung der Kontrahenten zu verschiedenen Kleingruppen</li><li>- Erweiterung des Diskussionskreises</li><li>- Wechsel der Kontaktpersonen</li></ul>                              |

S. 495 Abb. 79 a





(Fortsetzung)

| Situation in Gruppen                                                    | Maßnahme                                                                                                                                                                                                                                                                                   |
|-------------------------------------------------------------------------|--------------------------------------------------------------------------------------------------------------------------------------------------------------------------------------------------------------------------------------------------------------------------------------------|
| Desinteresse der Gruppe                                                 | <ul style="list-style-type: none"><li>- Interessenlageabfragen</li><li>- Gruppenmeinung über Situation / Verhalten abfragen</li><li>- Pro und Kontra über vorhandenes / nichtvorhandenes Interesse</li><li>- Provozierende Äußerungen gegenüber der Gruppe</li><li>- Paraphrasen</li></ul> |
| Abhängigkeitsgefühle einzelner, hierarchische Selbstbestätigung anderer | <ul style="list-style-type: none"><li>- Offenlegung des Problems durch Moderatoren</li><li>- Hilfe durch Dritte / Bildung von Koalitionen</li><li>- Aufzeigen von Verhaltensweisen</li></ul>                                                                                               |
| Ablehnung der Moderatoren                                               | <ul style="list-style-type: none"><li>- Diskussionsleitung auf andere Gruppenmitglieder übertragen</li><li>- Gruppe allein arbeiten lassen</li><li>- Neufestigung der Spielregeln</li><li>- Pro- und Kontra Spiel über Moderation</li></ul>                                                |
| Abwälzen, Einmischen, Rechtfertigung Vorurteile usw.                    | <ul style="list-style-type: none"><li>- Transparenzfragen, Rollenspiele, Utopiespiele</li><li>- Bewertungen und Kleingruppenarbeiten</li></ul>                                                                                                                                             |

S. 495 Abb. 79 b



## Führungsprinzipien, -modelle und -grundsätze

- **Führungsprinzipien**

können als Partialmodelle verstanden werden, da sie allgemein nur die Beseitigung von einzelnen Schwachstellen im Führungsprozess anstreben und lediglich bestimmte Teilaspekte der Führung behandeln. Die meisten Führungsprinzipien sind heute als "Management by ..."-Prinzipien bekannt.

- **Führungsmodelle**

"Führungsmodelle sind vereinfachte, pragmatische, teilweise normativ gemeinte Darstellungen des Führungsgeschehens im Bereich der Menschenführung, der Führungstechnik und der Führungsinhalte."

- **Führungsgrundsätze**

Die konkrete praktische Umsetzung der Führungsmodelle und -prinzipien erfolgt meist im Rahmen unternehmensspezifischer **Führungsgrundsätze** (Führungsrichtlinien).

## Führungsprinzipien

### Ablauf des Management by Exception

#### (1) Management by Exception (MbE)

Ziel dieses Prinzips ist in erster Linie die Entlastung des Vorgesetzten von Routineaufgaben und die eindeutige Regelung von Zuständigkeiten.

#### Bedingungen:

- Aufgabengebiete mit klar umrissenen Entscheidungsspielräumen für die Mitarbeiter
- Vorgabe klarer Regeln und Zuständigkeiten
- Messgrößen müssen ermittelbar sein
- Die Mitarbeiter müssen fähig und gewillt sein, in ihren Aufgabengebieten ihre Funktionen voll zu übernehmen und die Verantwortung für ihre Entscheidungen voll zu tragen

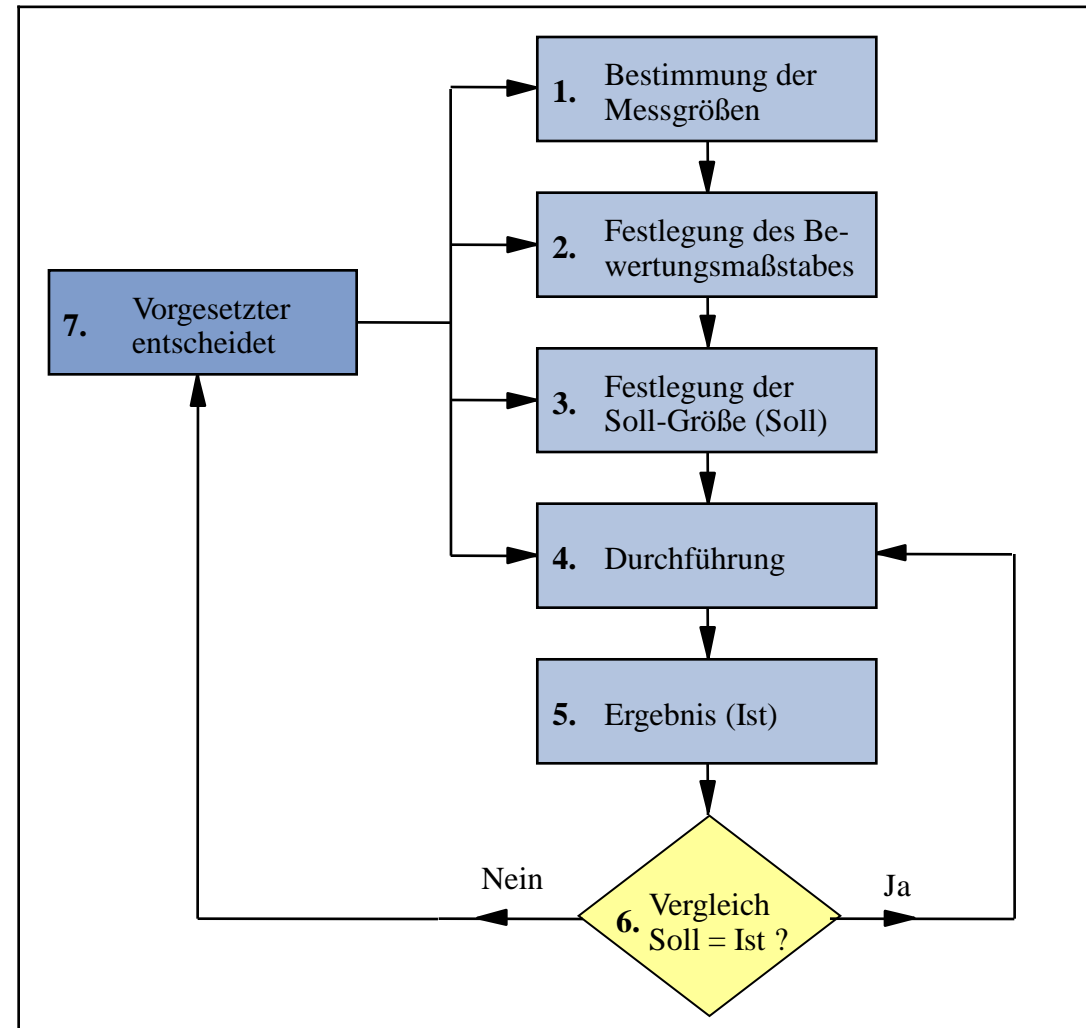

S. 497 Abb. 80



Management by Objectives (MbO)

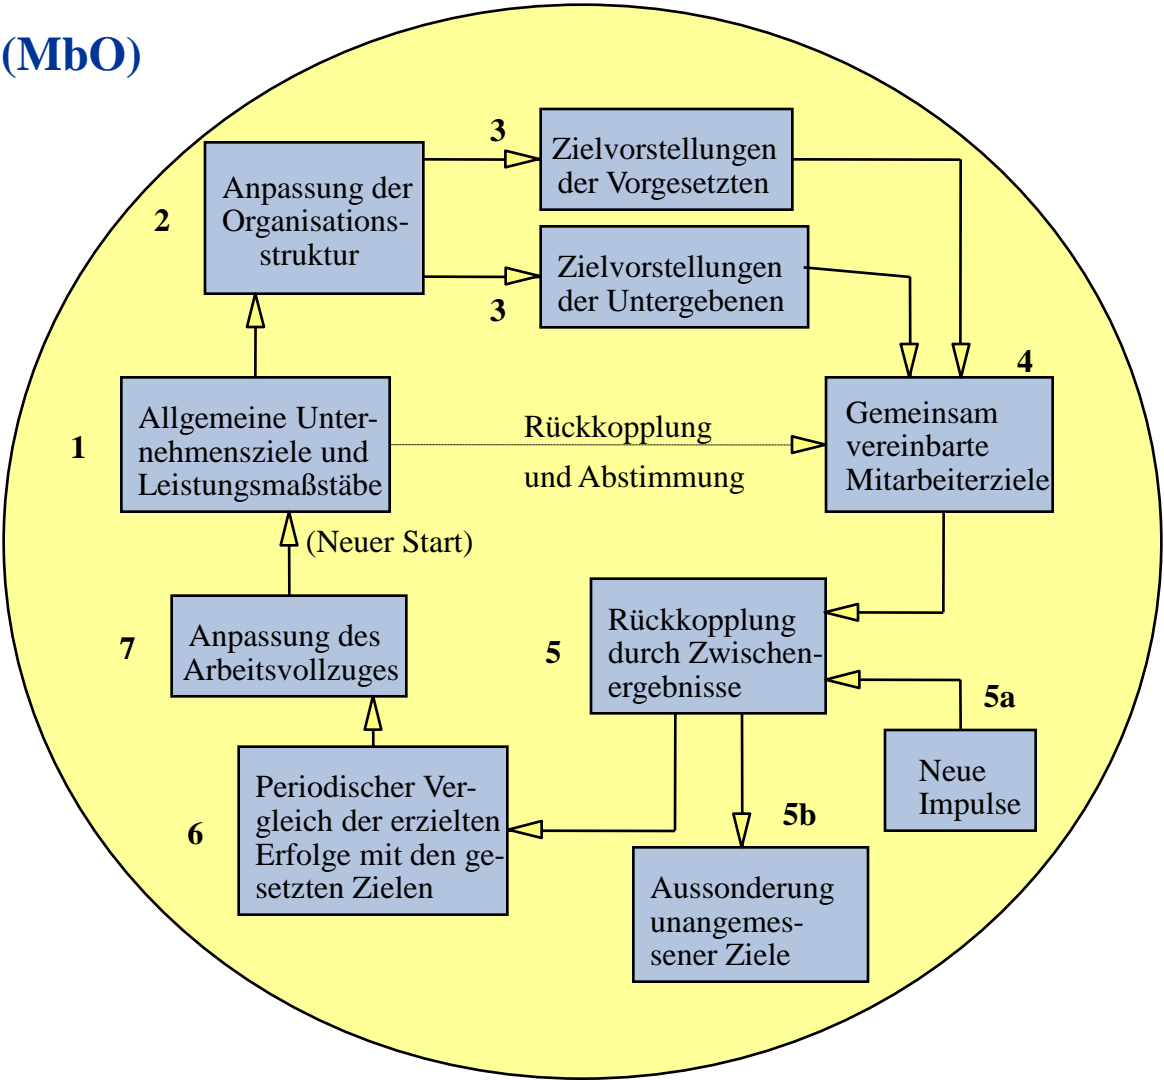

S. 500 Abb. 82  
Odiorne, G. S., entnommen aus: Häusler, J.:  
Führungssysteme und Modelle, Köln 1977, S. 66



## Voraussetzungen:

- Allgemeine Führungsrichtlinien sind zu erstellen, die Führungsgrundsätze und Führungsleitsätze enthalten und die Zusammenarbeit im Unternehmen regeln.
- Ein Zielsystem muss aufgebaut werden, d.h. es müssen operationale Ziele, ausgehend von den Unternehmenszielen, für alle Bereiche, Abteilungen und Mitarbeiter, formuliert werden.
- Eine zielorientierte Organisation mit Stellenbeschreibungen für die eindeutige Zuordnung von Subzielen ist notwendig.
- Ein Kontrollsystem ist aufzubauen, das Information zur Eigen- und zur Fremdkontrolle sowie zur Leistungsbeurteilung liefert.



## Ziele:

- Die Ziele müssen mit der Unternehmenspolitik und den allgemeinen Unternehmenszielen vereinbar sein.
- Das Ausmaß der Zielerreichung muss dem Einfluss des Stelleninhabers unterliegen.
- Die Ziele müssen klar und exakt formuliert sein. Zielinhalt, Zielausmaß und zeitlicher Bezug müssen festgelegt sein.
- Die Ziele sollen eine Herausforderung, aber keine Überforderung für den Stelleninhaber darstellen. Daher müssen sie an seinen Fähigkeiten ausgerichtet werden.
- Die Ziele müssen, um eine Kontrolle zu ermöglichen, objektiv messbar sein.

Der **Vergleich** der vorgegebenen Ziele mit den Ergebnissen und deren Analyse stellt eine der **Hauptaufgaben** der Führung dar.

Dieser Soll-Ist Vergleich bildet einerseits die **Grundlage** für die Mitarbeiterbeurteilung und stellt andererseits zusammen mit der Abweichungsanalyse die Basis zur Beantwortung der Frage dar, welche Entwicklungen eingetreten sind und inwieweit Änderungen der Ziele oder des Arbeitsvollzuges notwendig sind.



| Management by Objectives                                                                                                                                                                                                                                                                                                                                                                         |                                                                                                                                                                                                                                                                                                                                                                                                                                                                                                                                                                                 |
|--------------------------------------------------------------------------------------------------------------------------------------------------------------------------------------------------------------------------------------------------------------------------------------------------------------------------------------------------------------------------------------------------|---------------------------------------------------------------------------------------------------------------------------------------------------------------------------------------------------------------------------------------------------------------------------------------------------------------------------------------------------------------------------------------------------------------------------------------------------------------------------------------------------------------------------------------------------------------------------------|
| Vorteile                                                                                                                                                                                                                                                                                                                                                                                         | Nachteile                                                                                                                                                                                                                                                                                                                                                                                                                                                                                                                                                                       |
| <ul style="list-style-type: none"><li>- Die Führungsspitze wird entlastet.</li><li>- Mobilisierung der geistigen Ressourcen, d.h. die Förderung der Leistungsmotivation, der Eigeninitiative und der Verantwortungsbereitschaft.</li><li>- Bessere Identifikation der Mitarbeiter mit den Unternehmenszielen.</li><li>- Schaffung von Kriterien für eine leistungsgerechte Entlohnung.</li></ul> | <ul style="list-style-type: none"><li>- Probleme bei der operationalen Formulierung von Zielen für alle Ebenen, insbes. für die Führungs- und Stabsstellen.</li><li>- Der Planungs- und Zielbildungsprozess ist zeitaufwendig, Die Kosten für die Einführung des MbO sind relativ hoch.</li><li>- Gefahr des überhöhten Leistungsdrucks auf die Mitarbeiter.</li><li>- Die Konzentration auf messbare Größen und die Vernachlässigung von qualitativen Aspekten kann gefördert werden.</li><li>- Nicht alle Mitarbeiter werden gefördert (vgl. Mc Gregors Theorie X).</li></ul> |

S. 502 Abb. 82



## Management by System (MbS)

- Der Begriff MbS wird in zwei unterschiedlichen Bedeutungen benutzt. Einerseits versteht man unter diesem Begriff die Gestaltung eines umfassenden, computerunterstützten Informations-, Planungs- und Steuerungssystems (Management-Information-System: **MIS**) und, durch dessen Einsatz, die Erreichung einer weitgehenden Selbststeuerung der im Unternehmen vorhandenen Teilsysteme.
- Das Unternehmen wird als **System** betrachtet, bei dem die elektronischen Datenverarbeitungseinrichtungen ein Element bilden, das mit den anderen Elementen des Systems (z.B. Menschen) in Verbindung steht.
- Die beschriebenen Führungsmodelle gehen jedoch von einem etwas anderen Verständnis vom MbS aus, von einem Management, welches die **Systemtheorie** zur Grundlage hat. Hier handelt es sich um ein Konzept, welches versucht, das Gedankengut der allgemeinen Systemtheorie auf betriebliche Gegebenheiten zum Zweck der Analyse und zur Gewinnung von Informationen anzuwenden und somit eine effektivere Führung zu ermöglichen. Auch hier wird das Unternehmen als ein **System** betrachtet.

S. 502 f.





## Management by Motivation (MbM)

- Dies ist ein Führungsprinzip, bei dem die Führung durch **Leistungsanreize** im Mittelpunkt steht.
- Dieses Führungsprinzip orientiert sich an der **Individualität** der Mitarbeiter und dem Bestreben, diese in das betriebliche Handeln mit einzubeziehen.
- Die persönlichen Antriebskräfte der Mitarbeiter stellen demnach ein erhebliches **Potenzial** zur Leistungssteigerung dar, das von den Führungskräften erkannt und genutzt werden sollte.
- Dem **MbM-Prinzip** entsprechend muss sich die Führung an den Bedürfnissen der Mitarbeiter orientieren, um so Unternehmensziele und zugleich individuelle Motivationsvorstellungen zu koordinieren und zu verwirklichen.

S. 503 f.



## Führungsmodelle

### (1) Das Harzburger Modell

Delegation von Verantwortung nach folgenden Gesichtspunkten:

- Der Mitarbeiter erhält keine Einzelaufträge mehr, sondern einen fest umgrenzten Aufgabenbereich und die entsprechenden Kompetenzen, um innerhalb dieses Bereiches selbständig handeln und entscheiden zu können. Er trägt dabei die volle Verantwortung für seine Handlungen.
- Der Vorgesetzte darf, außer bei akuter Gefahr oder beim Auftreten von Fehlern zur stichprobenartigen Kontrolle, nicht in den Aufgabenbereich des Mitarbeiters eingreifen. Der Schwerpunkt der Führung liegt in der Kontrolle.

Die **Verantwortung** muss getrennt werden in:

- Die **Führungsverantwortung**, die der Vorgesetzte trägt. Er hat dafür einzustehen, dass er seine Pflichten als Vorgesetzter seinen Mitarbeitern gegenüber erfüllt, nicht aber, wie bei der autoritären Führung, für alles, was in seinem Bereich geschieht.
- Die **Handlungsverantwortung**, die der Mitarbeiter trägt. Er muss für alles einstehen, was er in seinem delegierten Aufgabenbereich tut oder unterlässt.



Organisatorische Voraussetzung für die Delegation von Verantwortung ist die Festlegung der Delegationsbereiche. Fixiert werden die Delegationsbereiche mit Hilfe von Stellenbeschreibungen. Diese Bieten dem Mitarbeiter, Vorgesetzten und Unternehmen eine Reihe von **Vorteilen**:

- Das Unternehmen wird in seiner Gesamtorganisation **durchsichtig**. Es müssen klare Aussagen über die Aufgabenzuordnung und über die Unterstellungs- und Überstellungsverhältnisse gemacht werden, wodurch eine lückenlose Zuständigkeitsordnung geschaffen wird.
- **Kompetenzen** werden klar zugeordnet, wodurch Konflikte vermieden werden.
- Die fachliche **Beurteilung** des Mitarbeiters wird erleichtert und der Mitarbeiter weiß, welche Anforderungen an ihn gestellt werden.
- Die analytische **Arbeitsbewertung** und damit die **Entwicklung** eines möglichst gerechten Lohn- und Gehaltsgefüges wird erleichtert.
- Informations- und Kommunikationsrechte und -pflichten werden geregelt und somit gesichert.

S. 504 f.



**Allgemeinen Führungsanweisung** als Regel für das Zusammenwirken von Mitarbeiter und Vorgesetzten. Sie umfasst u.a. folgende Punkte:

- Eine kurze Darstellung des Wesens der Führung im Mitarbeiterverhältnis in Gegenüberstellung zu einer autoritären Führung.
- Die Kennzeichnung der Delegation von Verantwortung als Kernstück dieser Führung und die Grundregeln ihrer Anwendung.
- Die Pflichten des Mitarbeiters gegenüber seinem Vorgesetzten.
- Die Pflichten des Vorgesetzten gegenüber seinen Mitarbeitern.
- Die Darstellung der Verantwortung bei einer Führung im Mitarbeiterverhältnis, d.h. ihre Unterscheidung in Führungs- und in Handlungsverantwortung.
- Die Grundsätze der Anwendung von Mitarbeitergespräch und -besprechung.
- Die Grundsätze für die Dienstaufsicht und die Erfolgskontrolle.
- Die Regeln für die Anwendung von Kritik und Anerkennung.
- Die Grundsätze für die Information von oben nach unten, von unten nach oben und vom Stelleninhaber zu gleichgeordneten Stellen.
- Die Grundsätze für die Einrichtung von Stellvertretungen und Platzhalterschaft.

S. 505

| Das Harzburger Modell                                                                                                                                                                                                                                                                                                                                                                                                                                                                                                                                                                                                                                                                                                                                       |                                                                                                                                                                                                                                                                                                                                                                                                                                                                                                                                                                                                                                                                                                                                                                                                                                                                                                                                                       |
|-------------------------------------------------------------------------------------------------------------------------------------------------------------------------------------------------------------------------------------------------------------------------------------------------------------------------------------------------------------------------------------------------------------------------------------------------------------------------------------------------------------------------------------------------------------------------------------------------------------------------------------------------------------------------------------------------------------------------------------------------------------|-------------------------------------------------------------------------------------------------------------------------------------------------------------------------------------------------------------------------------------------------------------------------------------------------------------------------------------------------------------------------------------------------------------------------------------------------------------------------------------------------------------------------------------------------------------------------------------------------------------------------------------------------------------------------------------------------------------------------------------------------------------------------------------------------------------------------------------------------------------------------------------------------------------------------------------------------------|
| Vorteile                                                                                                                                                                                                                                                                                                                                                                                                                                                                                                                                                                                                                                                                                                                                                    | Nachteile                                                                                                                                                                                                                                                                                                                                                                                                                                                                                                                                                                                                                                                                                                                                                                                                                                                                                                                                             |
| <ul style="list-style-type: none"> <li>- Es werden Aufgaben, Befugnisse und Verantwortung anstatt permanenter Einzelaufträge delegiert.</li> <li>- Die Leistungsmotivation und Verantwortungsbereitschaft der Mitarbeiter wird durch die gegebenen Freiheiten gefördert.</li> <li>- Das selbständige Handeln, vor allem der Spezialisten, wird gefördert.</li> <li>- Eine Dezentralisation der Kompetenzen statt einer zentralen Entscheidungsgewalt. Die Entscheidungen werden auf der Ebene getroffen, wo sie am sachgerechtesten entschieden werden können.</li> <li>- Die Vorgesetzten werden entlastet.</li> <li>- Jeder weiß genau, was er tun soll und darf.</li> <li>- Das "Mitarbeiter-Vorgesetzten" Verhältnis kann verbessert werden.</li> </ul> | <ul style="list-style-type: none"> <li>- Es wird keine partizipative Führung realisiert, sondern es besteht eine Tendenz zu "einsamen" Einzelentscheidungen (Führung meist versteckt autoritär).</li> <li>- Es werden in erster Linie nur die vertikalen Hierarchiebedingungen berücksichtigt, die horizontale Koordination wird weitgehend vernachlässigt.</li> <li>- Es ist statisch, d.h. der Planungsaspekt und die Entwicklungen des Unternehmens werden nicht ausreichend berücksichtigt.</li> <li>- Motivationstheoretische und gruppendynamische Aspekte werden vernachlässigt, es wird die These vertreten, dass Führung im Mitarbeiterverhältnis der optimale Stil ist.</li> <li>- Die große Anzahl von Organisationsregeln (315) führt zu einer Bürokratisierung der internen Beziehung.</li> <li>- Durch die Delegationsbereiche besteht die Gefahr von "Kästchendenken", die Kreativität der Mitarbeiter wird kaum gefördert.</li> </ul> |

S. 506 Abb. 83



## **(2) Das St. Galler Management-Modell**

### **1. Das Unternehmen:**

Zuerst erfolgt eine mehrdimensionale Unternehmensanalyse. Sie untersucht die Umwelt des Unternehmens, die Märkte und Marktleistungen und die Funktionsbereiche, Gestaltungsebenen und Aufgaben des Unternehmens.

### **2. Die Unternehmensführung:**

Die Unternehmensführung umfasst die Gesamtheit aller Gestaltungs-, Lenkungs- und Entwicklungsprozesse, die das Unternehmen bestimmen. Zur allgemeinen Charakterisierung der Aufgaben und Tätigkeiten der Unternehmensführung werden drei sich gegen-seitig durchdringende Dimensionen verwendet

## Die drei Dimensionen der Unternehmensführung:

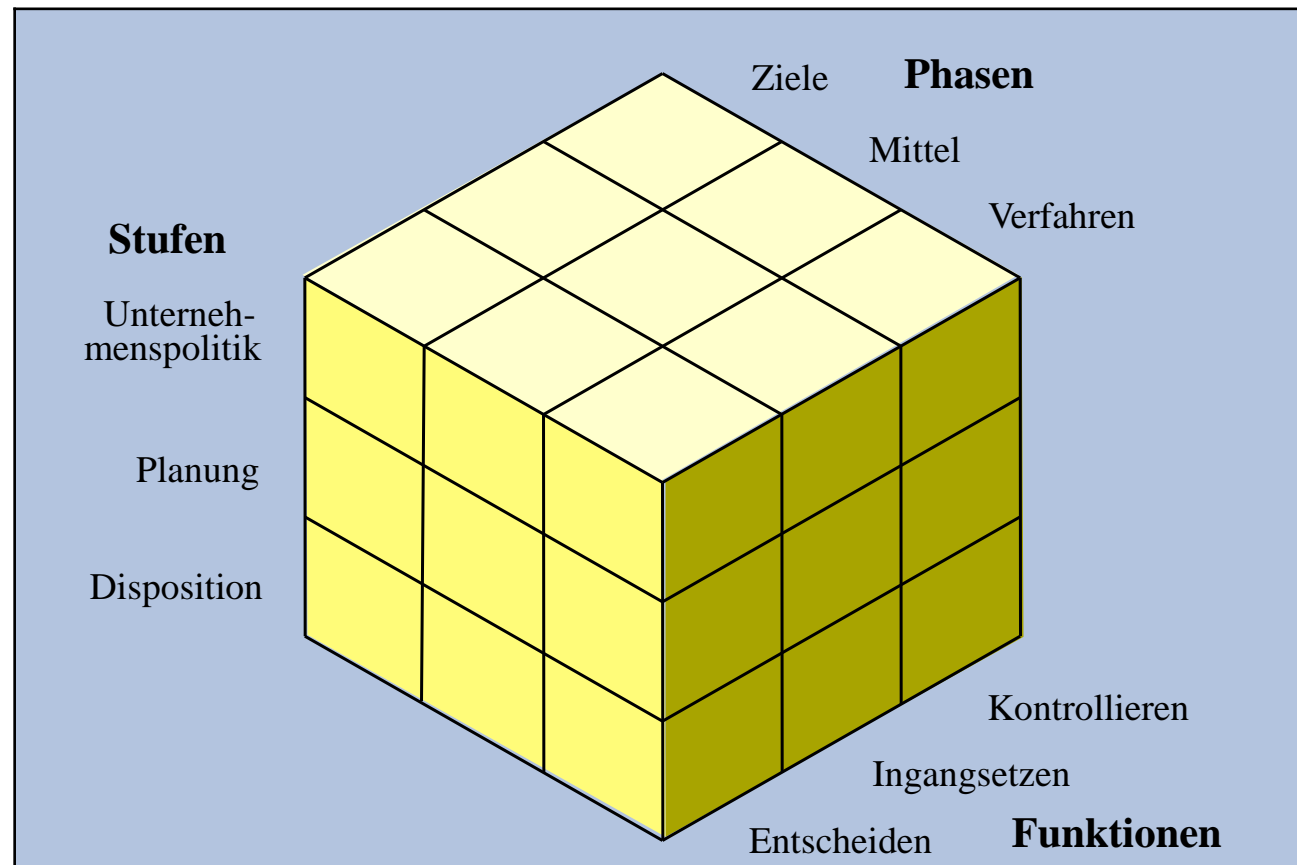

S. 507 Abb. 84

(in Anlehnung an: Ulrich, H./Krieg, W., entnommen aus: Rühli, E.: Gestaltungsmöglichkeiten in der Unternehmensführung. Führungsstil, Führungsmodelle, Führungsrichtlinien, Mitwirkung und Mitbestimmung, Bern/Stuttgart/Wien 1992, S. 66)

Jung, Hans: Personalwirtschaft, 9. Aufl., München 2010.

© Oldenbourg Wissenschaftsverlag



**3. Die Unternehmensorganisation:** Die organisatorische Gestaltung dient dem Erreichen der Unternehmensziele, d.h. sie ist nur Mittel zum Zweck. Vor der Festlegung der konkreten Organisationsstruktur müssen in einem Organisationskonzept folgende Grundsatzfragen beantwortet werden:

- Nach welchen Kriterien sollen die dezentralen operationellen Einheiten gebildet werden?
- Nach welchen Kriterien soll das Top-Management organisiert werden?
- Welche zentralen Dienststellen sind erforderlich, um die notwendigen Kontrollen bei dezentralisierten operationalen Einheiten aufrecht erhalten zu können?
- Welche Aufgaben und Probleme können im Rahmen der dauerhaften Organisationsstruktur nicht oder nur schwer unter Kontrolle gebracht werden?
- Durch welche Spielregeln und Prozesse sollen alle Einzelteile der Organisation zusammengehalten werden, und wie soll ihr Zusammenspiel gestaltet sein?

Auf der Basis dieses Konzeptes können dann die konkreten Organigramme für das Unternehmen und für die einzelnen Bereiche erstellt werden.





**4. Die Führungsbereiche des Vorgesetzten:** Hier geht es um das richtige Erfassen und Verstehen von Management-Aufgaben durch den Vorgesetzten.

- Die generellen Strukturen enthalten dabei einen mehr oder weniger großen Spielraum für individuelles Verhalten und die unmittelbare Art der Führung.
- Damit die einzelnen Führungskräfte in die Lage versetzt werden, diese Spielräume sinnvoll zu gestalten, ist die Beherrschung gewisser Verhaltensweisen und verschiedener Methoden und Verfahren zur Lösung von Problemen notwendig.
- Dieser vierte Teil der Unternehmensführung beschäftigt sich daher mit dem Gebiet der Menschenführung, mit Führungsverhalten und mit Verfahren und Hilfsmitteln der Führung, um so das individuelle Führungsverhalten zu verbessern.



## Das 7-S-Modell

- **Structure:** Formale Aufbauorganisation; die Kompetenzordnung, Delegation, Zentralisation/ Organisation, Strukturtypen etc.
- **Systems:** Führungsprozesse; Planung, Kontrolle, Steuerung, Anreizsysteme, Informationssysteme etc.
- **Strategy:** Unternehmenspolitik; Strategie, Marktverhalten, Sortimentspolitik etc.
- **Style:** Führungsstil; Vorgesetzten-Mitarbeiter-Beziehung, Umgang mit Kunden, Lieferanten, Mitarbeitern etc.
- **Staff:** Aufbau und Pflege der Human-Ressourcen; Attraktivität auf dem Arbeitsmarkt, Wertung des Mitarbeiters etc.
- **Skills:** Entwicklung der Fähigkeiten der Mitarbeiter; Management Development, Schulung etc.
- **Shared Values:** Unternehmenskultur; gemeinsam getragene Werte, Normen und Wissensbestände

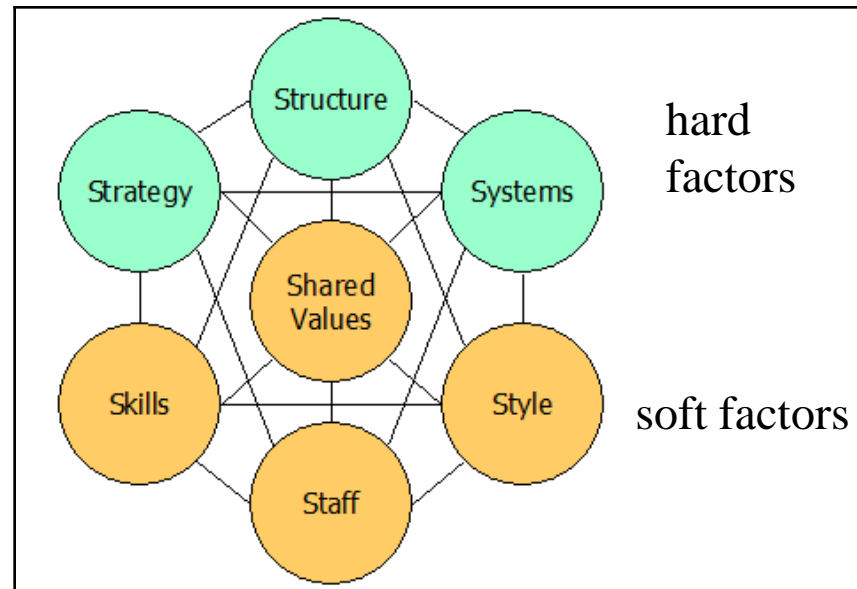

Die wichtigsten Aussagen des 7-S-Modells:

- Die **Voraussetzung** für eine erfolgreiche Führung ist die angemessene Berücksichtigung aller 7 Elemente mit ihren gegenseitigen Abhängigkeiten.
- Im Gegensatz zur euroamerikanischen Art des Management sollen bei einer erfolgreichen Führung die **weichen Faktoren** einen höheren Stellenwert einnehmen als die harten Faktoren.
- Der **Unternehmenskultur** (Shared Values) kommt bei der Führung eine zentrale Bedeutung zu. Sie ist das tragende Element der Führung.

S. 511 Abb. 86

## Das Ordnungsgerüst des Züricher Ansatzes

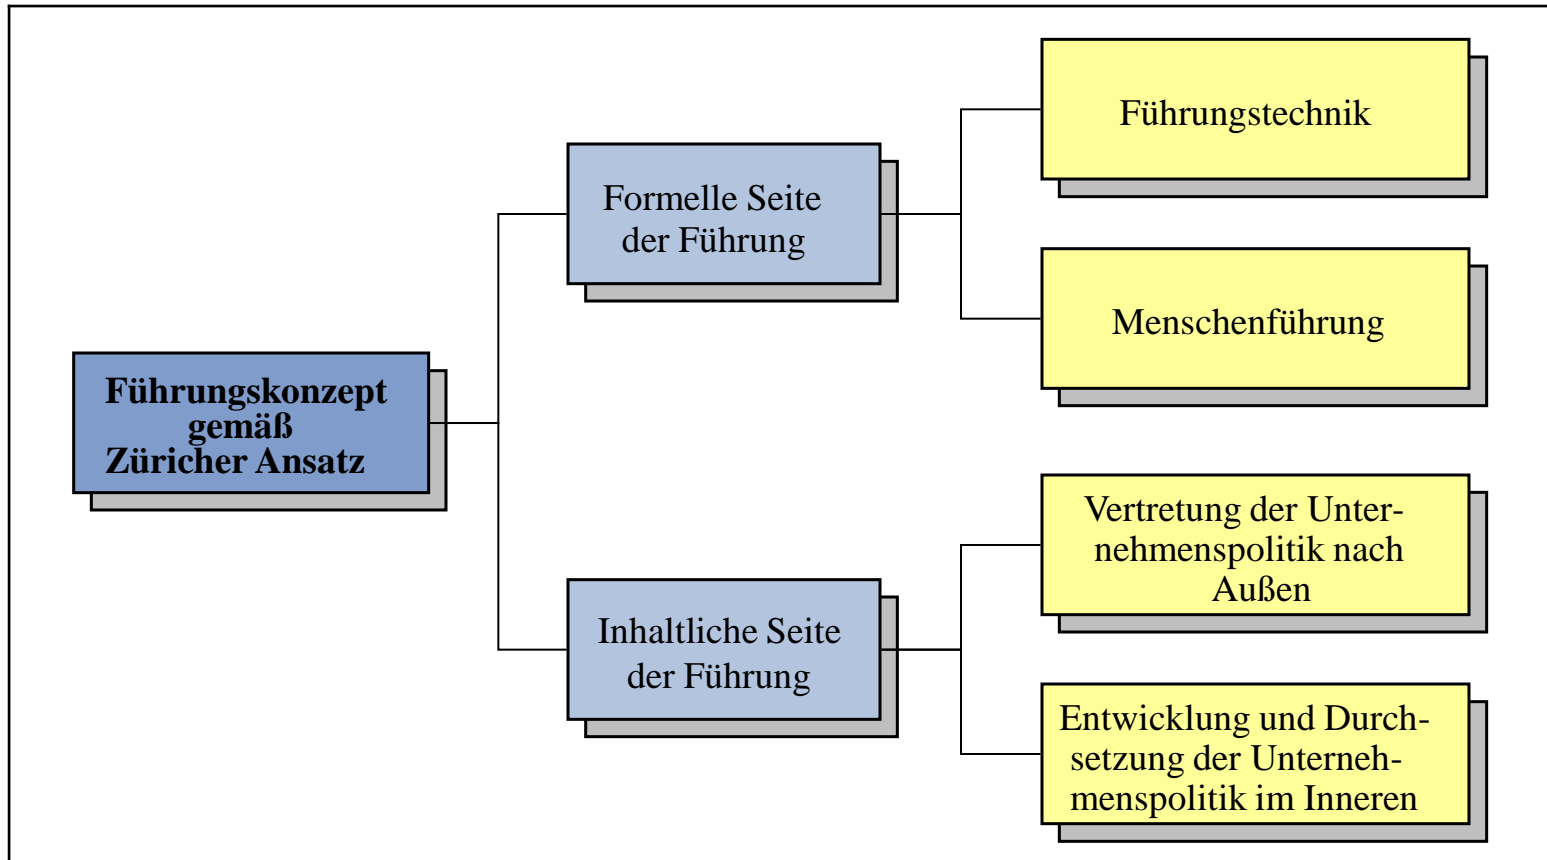

S. 512 Abb. 87

(in Anlehnung an: Rühli, E.: Gestaltungsmöglichkeiten in der Unternehmensführung, Führungsstil, Führungsmodelle, Führungsrichtlinien, Mitwirkung und Mitbestimmung, Bern/Stuttgart/Wien 1992, S. 3)

Jung, Hans: Personalwirtschaft, 9. Aufl., München 2010.

© Oldenbourg Wissenschaftsverlag



Die konstitutiven Elemente der Führungstechnik

| <div>Elemente</div> <div>Aspekte</div> | Willensbildung           |                               | Willensdurchsetzung                                        |                          |
|----------------------------------------|--------------------------|-------------------------------|------------------------------------------------------------|--------------------------|
|                                        | Planung                  | Entscheidung                  | Anordnung                                                  | Kontrolle                |
| institutionelle                        | Planungs-<br>instanzen   | Entscheidungs-<br>instanzen   | Anordnungs-<br>instanzen                                   | Kontroll-<br>instanzen   |
| funktionelle                           | Planungs-<br>prozesse    | Entscheidungs-<br>prozesse    | Anordnungs-<br>erteilungs-<br>prozesse<br>(Befehlsausgabe) | Kontroll-<br>prozesse    |
| instrumentale                          | Planungs-<br>instrumente | Entscheidungs-<br>instrumente | Anordnungs-<br>instrumente                                 | Kontroll-<br>instrumente |

S. 513 Abb. 88  
(in Anlehnung an: Rühli, E.: Gestaltungsmöglichkeiten in der Unternehmensführung, Führungsstil, Führungsmodelle, Führungsrichtlinien, Mitwirkung und Mitbestimmung, Bern/Stuttgart/Wien 1992, S. 6)

## Die konstitutiven Elemente der Menschenführung

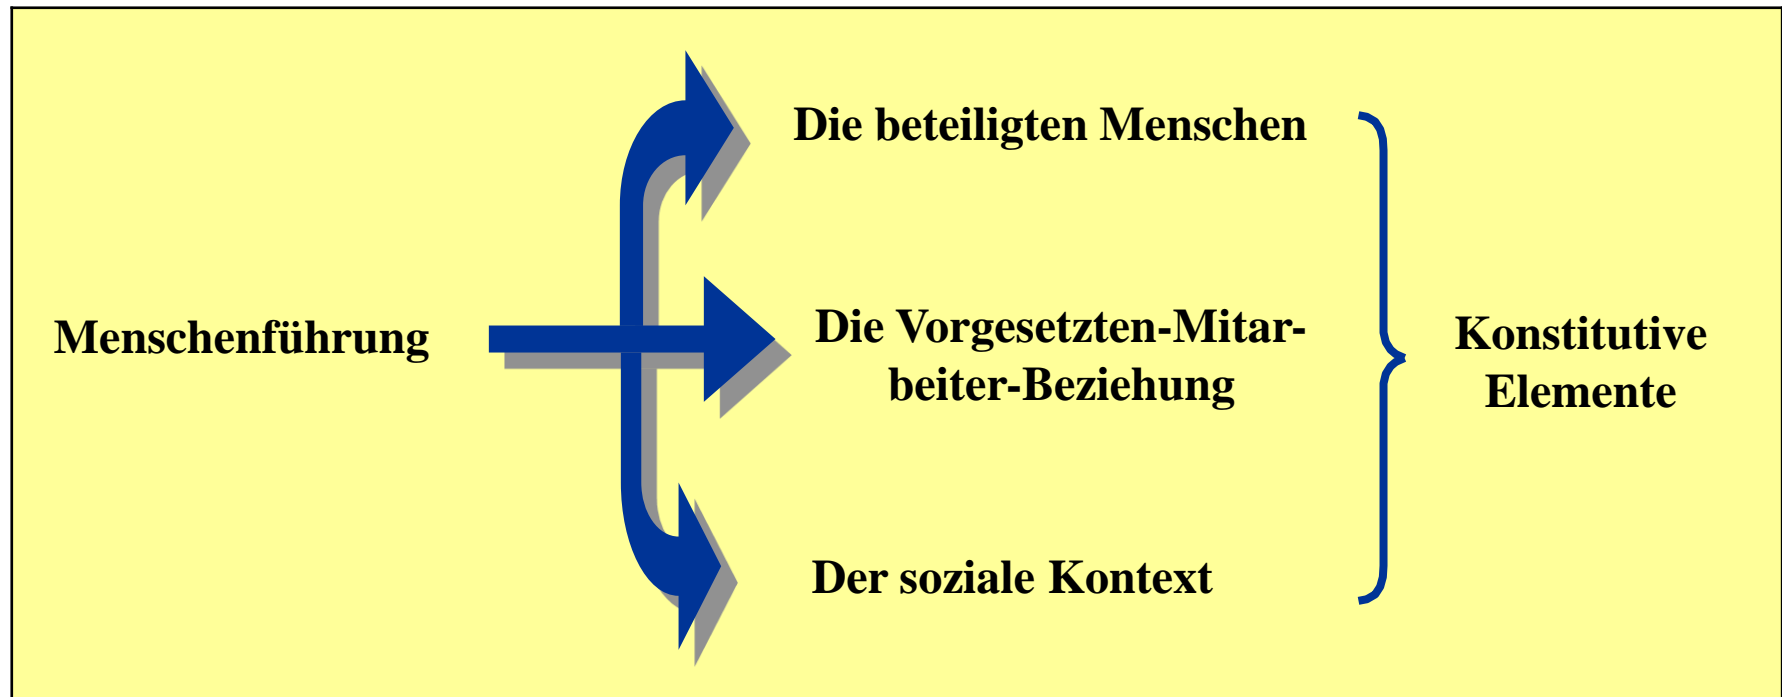

S. 514 Abb. 89

(in Anlehnung an: Rühli, E.: Gestaltungsmöglichkeiten in der Unternehmensführung, Führungsstil, Führungsmodelle, Führungsrichtlinien, Mitwirkung und Mitbestimmung, Bern/Stuttgart/Wien 1992, S. 7)

Jung, Hans: Personalwirtschaft, 9. Aufl., München 2010.

© Oldenbourg Wissenschaftsverlag

## Die konstitutiven Elemente der Unternehmenspolitik

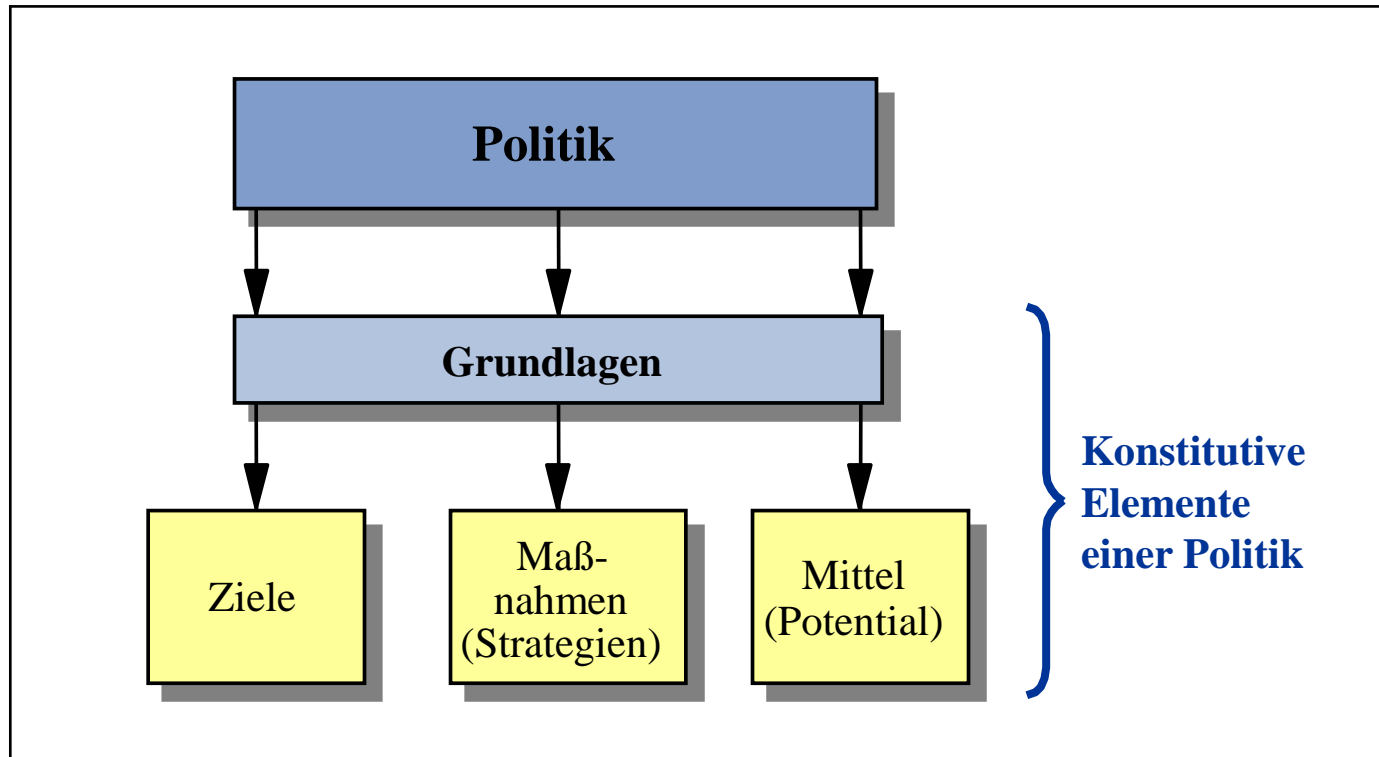

S. 514 Abb. 90

(in Anlehnung an: Rühli, E.: Gestaltungsmöglichkeiten in der Unternehmensführung, Führungsstil, Führungsmodelle, Führungsrichtlinien, Mitwirkung und Mitbestimmung, Bern/Stuttgart/Wien 1992, S. 9)

Jung, Hans: Personalwirtschaft, 9. Aufl., München 2010.

© Oldenbourg Wissenschaftsverlag

## Die Unternehmung als Teil des Umfeldes

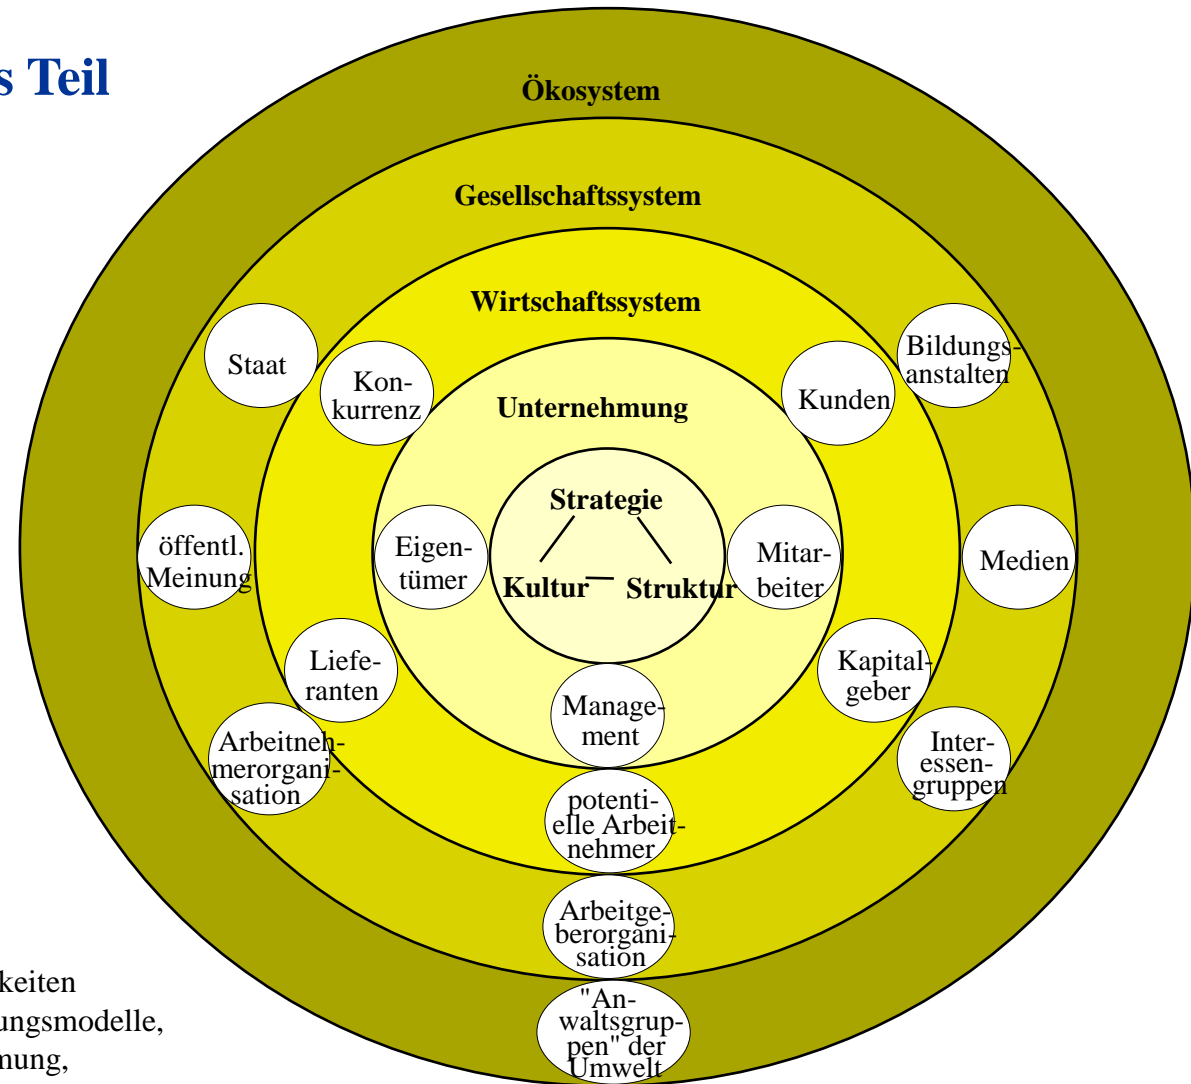

S. 516 Abb. 91  
(in Anlehnung an: Rühli, E.: Gestaltungsmöglichkeiten  
in der Unternehmensführung, Führungsstil, Führungsmodelle,  
Führungsrichtlinien, Mitwirkung und Mitbestimmung,  
Bern/Stuttgart/Wien 1992, S. 14)





## Führungsgrundsätze

### Beispiele für Führungsgrundsätze

- Die Führung der Mitarbeiter ist an der Erreichung der **Unternehmensziele** auszurichten. Dabei gelten als Unternehmensziele sowohl ökonomische Erfolgsgrößen als auch die Mitarbeiterzufriedenheit und eine partnerschaftliche Arbeitsatmosphäre.
- Die **Bildung von Zielen** und die Planung von Aufgaben haben unter Einbeziehung der Mitarbeiter in den einzelnen Teilbereichen zu erfolgen. Die gemeinsame Zielvereinbarung trägt zur **erhöhten Identifikation** mit den eigenen Aufgaben und Tätigkeiten bei und wirkt positiv auf Motivation und Leistungsbereitschaft der Mitarbeiter.
- Hinsichtlich der Realisierung sollen Vorgesetzte bestimmte Aufgaben an die Mitarbeiter **delegieren**, die durch Übertragung von Kompetenz und Verantwortung von diesen eigenständig und eigenverantwortlich zu erfüllen sind.
- Voraussetzungen für eine **wirkungsvolle** Zusammenarbeit bilden dabei gegenseitiges Vertrauen, Loyalität, Aufrichtigkeit, Offenheit und der sachliche Informations- und Meinungsaustausch zwischen Führungskräften und unterstellten Mitarbeitern.



(Fortsetzung)

- Der wechselseitige **Informationsaustausch** ist ein wichtiger Bestandteil des kooperativen Führungsstils. Informationen müssen schnell und eindeutig überall dahin vermittelt werden, wo sie benötigt werden. Führungskräfte und Mitarbeiter müssen sich die zur Erfüllung der Aufgaben benötigten Informationen beschaffen und sich mit den nötigen Informationen versorgen.
- Die im Rahmen der **Kontrolle** angestrebten Methoden und Maßstäbe sind den Mitarbeitern vorher mitzuteilen. Kontrollen dienen der Überwachung der Arbeitsabläufe und der Arbeitsergebnisse im Hinblick auf die Erreichung der **Unternehmensziele**. Sie sollten unter Einbeziehung der Mitarbeiter durchgeführt werden. Die Ergebnisse der Kontrollen sind mit den Mitarbeitern zu besprechen, bei fehlerhaften Abweichungen sind die Ursachen festzustellen und geeignete Korrekturmaßnahmen einzuleiten.
- Die **Beurteilung** der Leistungen und des Verhaltens von Mitarbeitern sollte ebenfalls unter Einbeziehung der Mitarbeiter geschehen. Die Beurteilung sollte das Ergebnis eines gemeinsamen Beurteilungsgespräches sein, in dessen Verlauf der Mitarbeiter selbst Stellung nehmen kann.



(Fortsetzung)

- Gute Leistungen müssen von den Führungskräften anerkannt und herausgestellt werden, ebenso müssen unzureichende Leistungen im Rahmen eines Kritikgespräches unter vier Augen erörtert werden.
- Die Unternehmensleistung wird durch die **Leistungsfähigkeit** und die **Leistungsbereitschaft** der Mitarbeiter geprägt, daher ist es wichtig, dass diese von den Führungskräften entsprechend motiviert und gefördert werden.
- Führungskräfte haben die Aufgabe, leistungsorientierte Mitarbeiter nach gemeinsamer Absprache durch den Einsatz geeigneter Maßnahmen zu fördern, um ihnen einen Aufstieg im Unternehmen zu ermöglichen.
- Jede Führungskraft hat neben der Förderung und Entwicklung geeigneter Mitarbeiter im Rahmen personeller Einzelmaßnahmen auch dafür Sorge zu tragen, dass ihr Führungsbereich (Organisationseinheit) bezüglich seines Wissensstandes, seiner Leistungsfähigkeit und seiner Wirtschaftlichkeit **kontinuierlich verbessert** wird.



## Trainingsmethoden für Führungskräfte

### Das Peter-Prinzip

„In der Hierarchie neigt jeder Beschäftigte dazu,  
bis an die Stufe seiner Unfähigkeit aufzusteigen.“

- Das Syndrom des Pseudo-Erfolgs und das Endplatzierungs-Syndrom
- Merkmale der Endplatzierung
- Reaktionen beim Erreichen der Stufe der Inkompetenz

## Das Gordon-Konzept

### Das Verhaltensfenster

Dies ist eine anschauliche Darstellung des Verhaltens jedes Gruppenmitgliedes.

Das Fenster wird in 2 Teile eingeteilt:

- Im oberen Fenster zeigen sich Verhaltensweisen, die man als Führer akzeptieren kann
- Im unteren Fenster zeigen sich Verhaltensweisen, die man nicht akzeptieren kann, weil sie ein Problem aufgeben.

Das Beispiel:

Carrie, ein Gruppenmitglied, arbeitet fleißig an ihrem Schreibtisch. Seit kurzem zeigt Tom, ein anderes Gruppenmitglied, ein großes Bedürfnis, in ihr Büro zu kommen. Der dies beobachtende Führer meint, Tom verschwende ihre und seine Zeit. Dieses Verhalten kann man nicht akzeptieren.

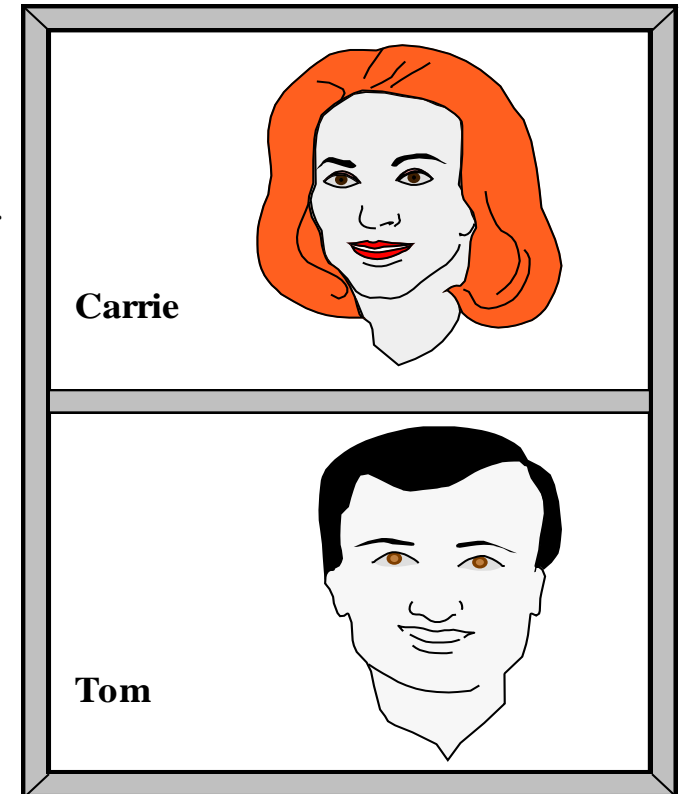

S. 525 Abb. 92

(in Anlehnung an: Gordon, T.: Managerkonferenz - Effektives Führungstraining, 11. Auflage, München 1994, S. 47 f.)

Jung, Hans: Personalwirtschaft, 9. Aufl., München 2010.

© Oldenbourg Wissenschaftsverlag

## Die 3-Zonen Verhaltensfenster

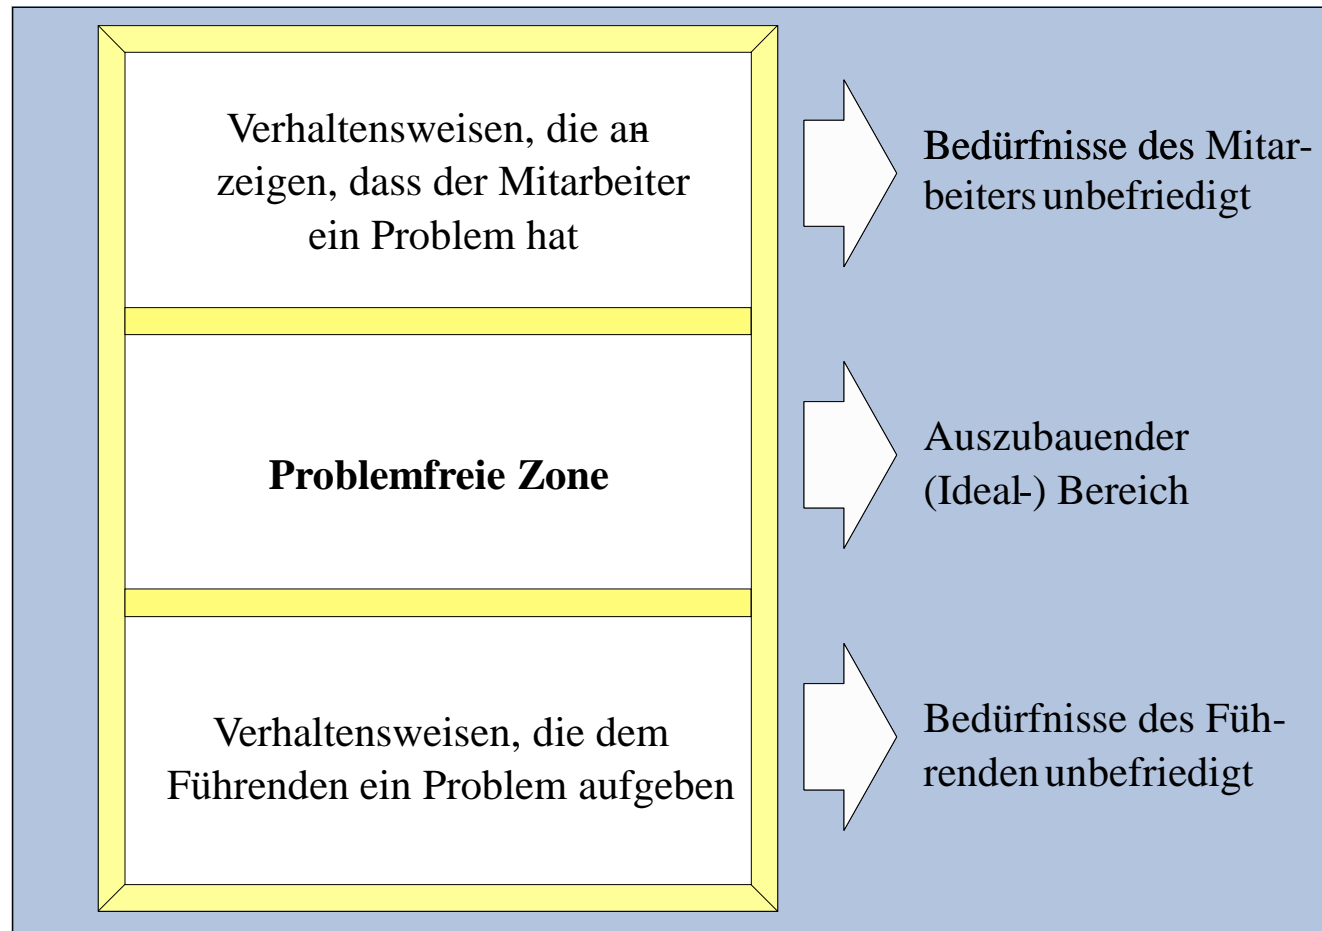

S. 526 Abb. 93

(in Anlehnung an: Gordon, T.: Managerkonferenz - Effektives Führungstraining, 11. Auflage, München 1994, S. 54)

Jung, Hans: Personalwirtschaft, 9. Aufl., München 2010.

© Oldenbourg Wissenschaftsverlag

## Konfliktbehandlung

### Ich gewinne, Du verlierst-Methode

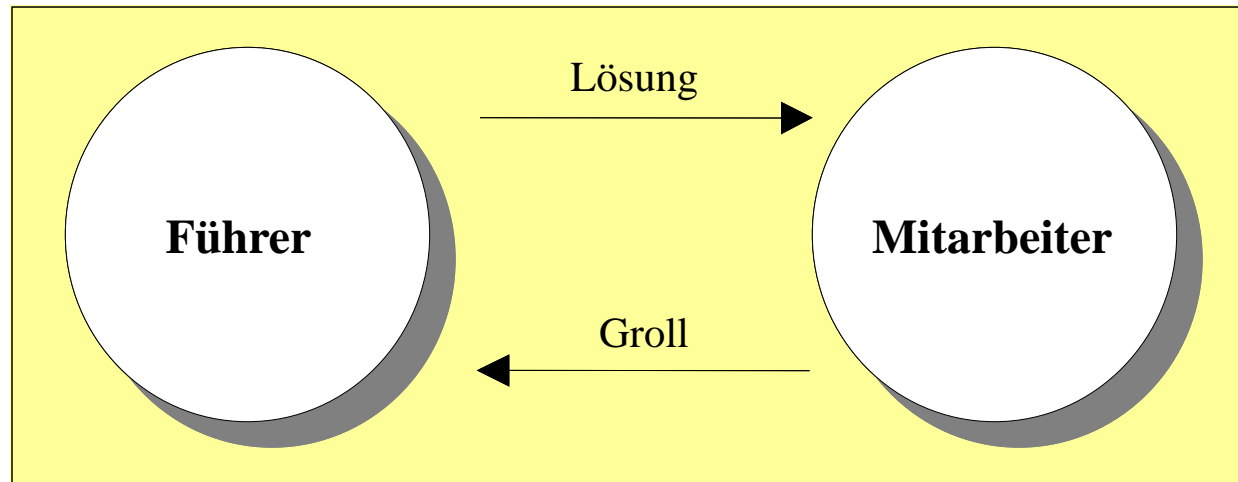

## Du gewinnst, Ich verliere-Methode

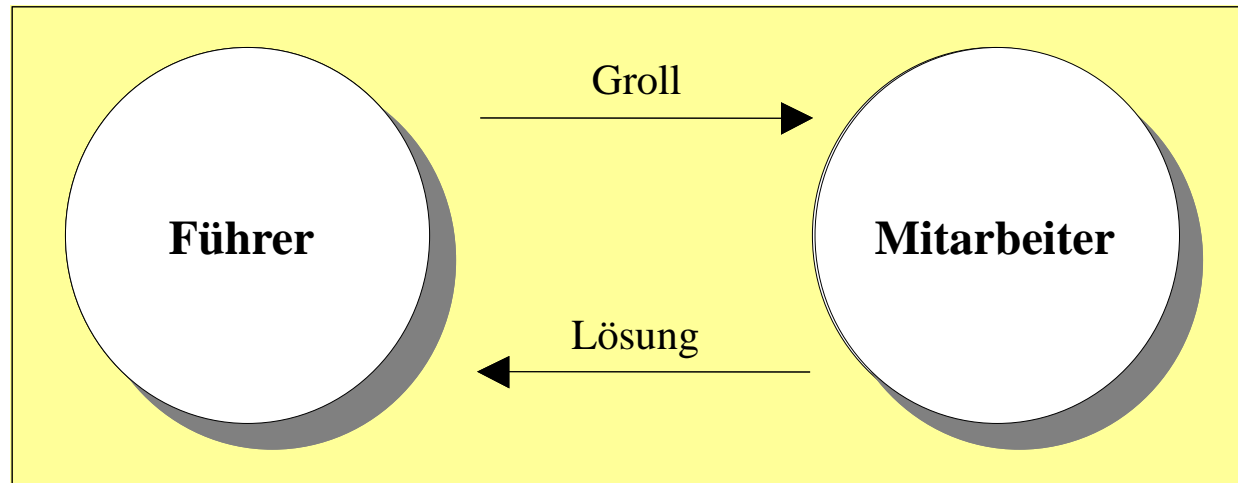

S. 529 Abb. 95

Jung, Hans: Personalwirtschaft, 9. Aufl., München 2010.

© Oldenbourg Wissenschaftsverlag



## Die Jeder-Gewinnt-Methode

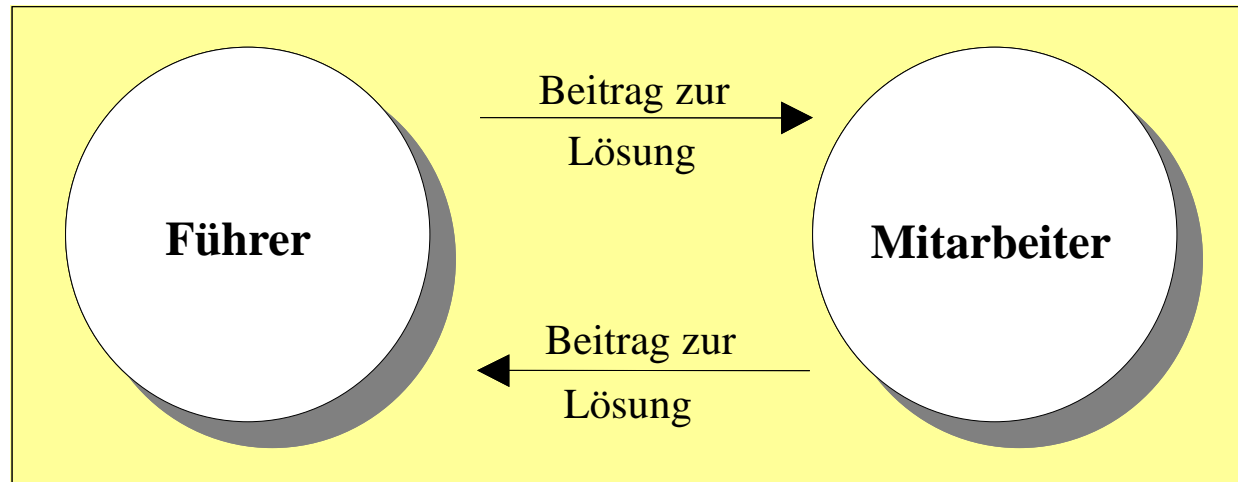

S. 529 Abb. 96

Jung, Hans: Personalwirtschaft, 9. Aufl., München 2010.

© Oldenbourg Wissenschaftsverlag

## Neurolinguistische Programmierung

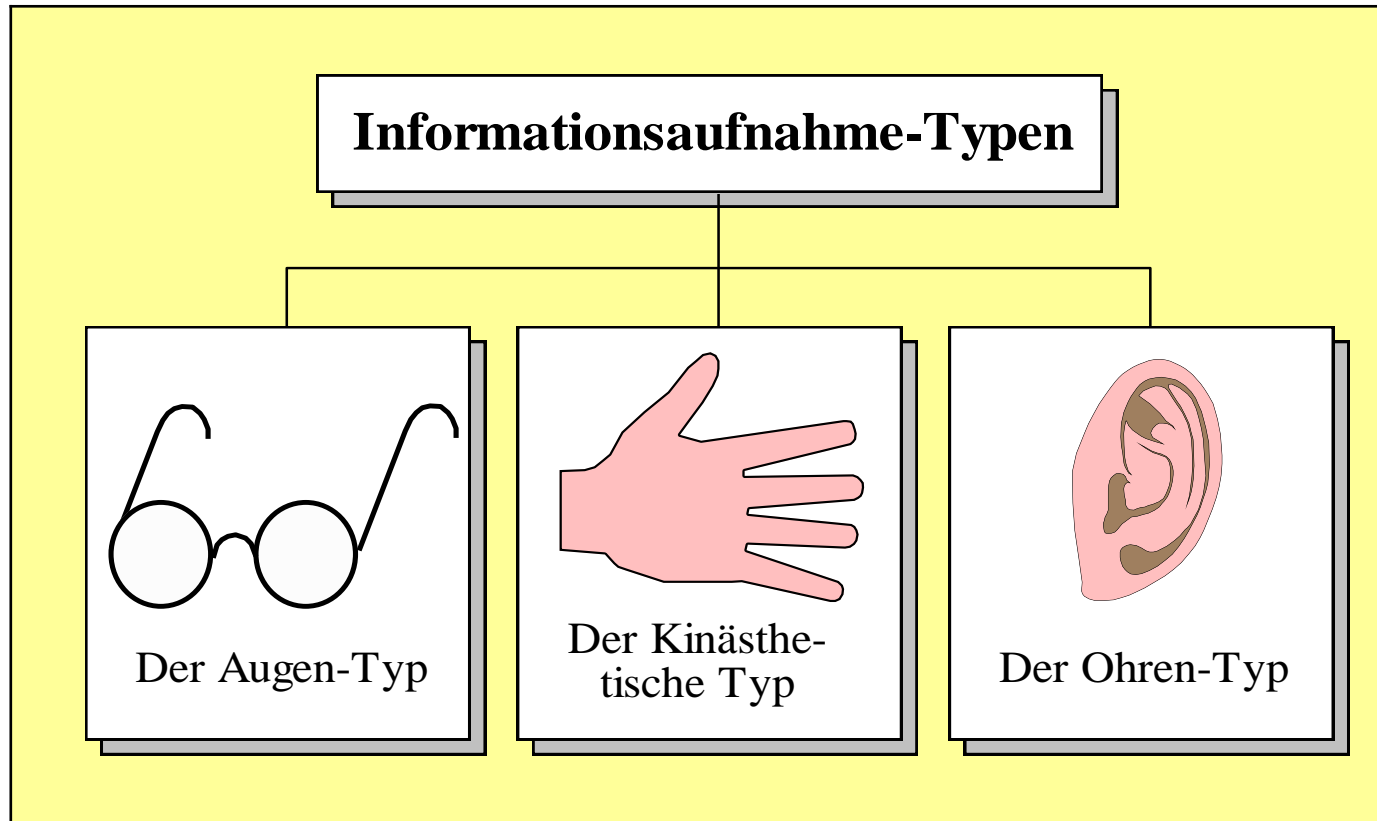

S. 531 Abb. 97

Jung, Hans: Personalwirtschaft, 9. Aufl., München 2010.

© Oldenbourg Wissenschaftsverlag

## Die Transaktionsanalyse (nach Eric Berne)

### Ich-Zustände

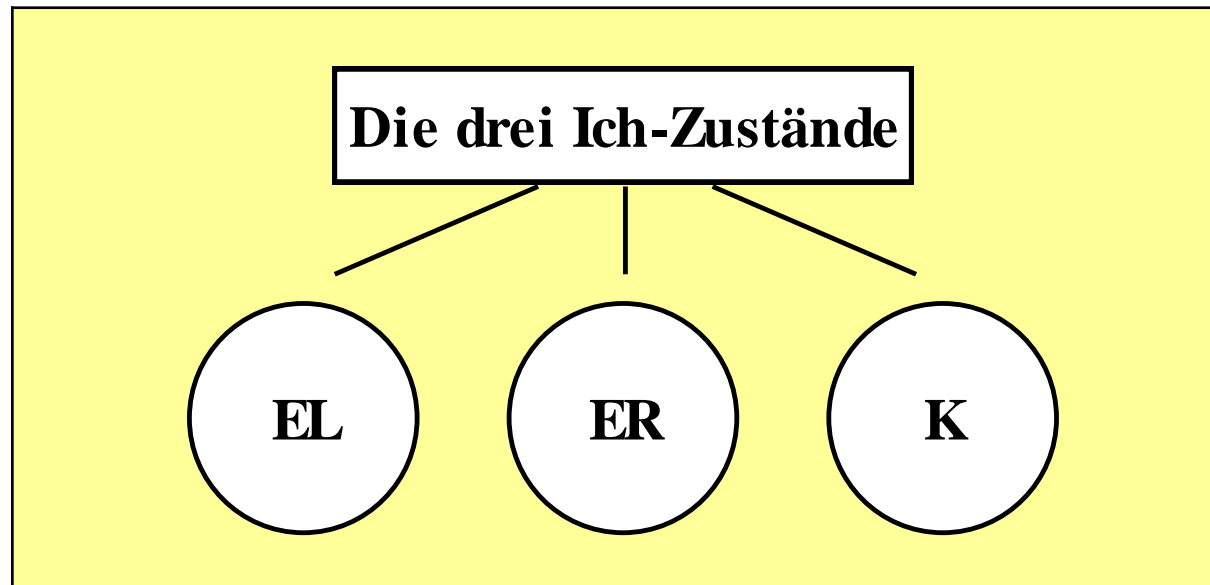



Das  
Eltern-Ich

| Das Eltern-Ich                                                                    | Körperliche Indizien:                                                                                                                                                                                                  | Sprachliche Indizien:                                                                                                                                                                                                                                 |
|-----------------------------------------------------------------------------------|------------------------------------------------------------------------------------------------------------------------------------------------------------------------------------------------------------------------|-------------------------------------------------------------------------------------------------------------------------------------------------------------------------------------------------------------------------------------------------------|
| 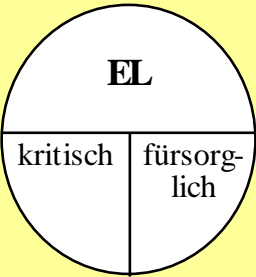 | <p>Warnende Bewegungen</p> <p>Belehrendes Gebaren</p> <p>Der ausgestreckte Zeigefinger</p> <p>Mit dem Fuß auf den Boden klopfen</p> <p>Einem anderen den Kopf tätscheln</p> <p>Die Arme vor der Brust verschränken</p> | <p>Kann ich dir helfen?</p> <p>Tut dir etwas weh?</p> <p>Tu gefälligst.....!</p> <p>Das musst du aber anders machen!</p> <p>Nie machst du etwas richtig!</p> <p>Wie oft habe ich dir schon gesagt.....!</p> <p>Was werden denn die anderen sagen?</p> |

S. 533 Abb. 99



Das  
Erwachsenen-Ich

| Das Erwachsenen-Ich                                                               | Körperliche Indizien:                                                                                                                                                                                                                   | Sprachliche Indizien:                                                                                                                      |
|-----------------------------------------------------------------------------------|-----------------------------------------------------------------------------------------------------------------------------------------------------------------------------------------------------------------------------------------|--------------------------------------------------------------------------------------------------------------------------------------------|
|  | <p>Ruhige, sachliche Haltung und Einstellung</p> <p>Interesse an der Umgebung und dem Geschehen,</p> <p>ausgedrückt durch Mimik, Haltung usw.</p> <p>Nachdenklichkeit, Erwägungen</p> <p>Finger an der Nase, Fingerspitzen zusammen</p> | <p>Was?</p> <p>Warum?</p> <p>Wie?</p> <p>Wer?</p> <p>Wo?</p> <p>Meiner Meinung nach ...</p> <p>Wahrscheinlich ...</p> <p>Ich denke ...</p> |

S. 534 Abb. 100



Das  
Kindheits-Ich

| Das Kindheits-Ich                                                                 | Körperliche Indizien:                                                                                                                                              | Sprachliche Indizien:                                                                                                                                                                                      |
|-----------------------------------------------------------------------------------|--------------------------------------------------------------------------------------------------------------------------------------------------------------------|------------------------------------------------------------------------------------------------------------------------------------------------------------------------------------------------------------|
| 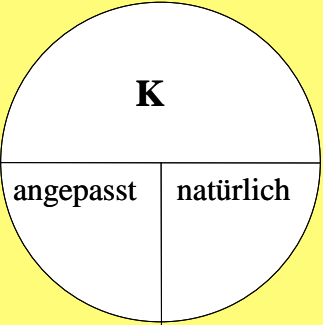 | <p>Niedergeschlagene Augen</p> <p>Hohe, weinerliche Stimme</p> <p>Die Hand heben, wenn man etwas sagen möchte</p> <p>Entzücken</p> <p>Hüpfen, springen, lachen</p> | <p>Ich will.....!</p> <p>Gib mir das!</p> <p>Ich wünsche mir....</p> <p>Schau mal, was ich kann!</p> <p>Immer bin ich schuld!</p> <p>Ich bin ja unmöglich.....</p> <p>Das ist aber alles sehr traurig.</p> |

S. 534 Abb. 101



Parallele  
Transaktionen

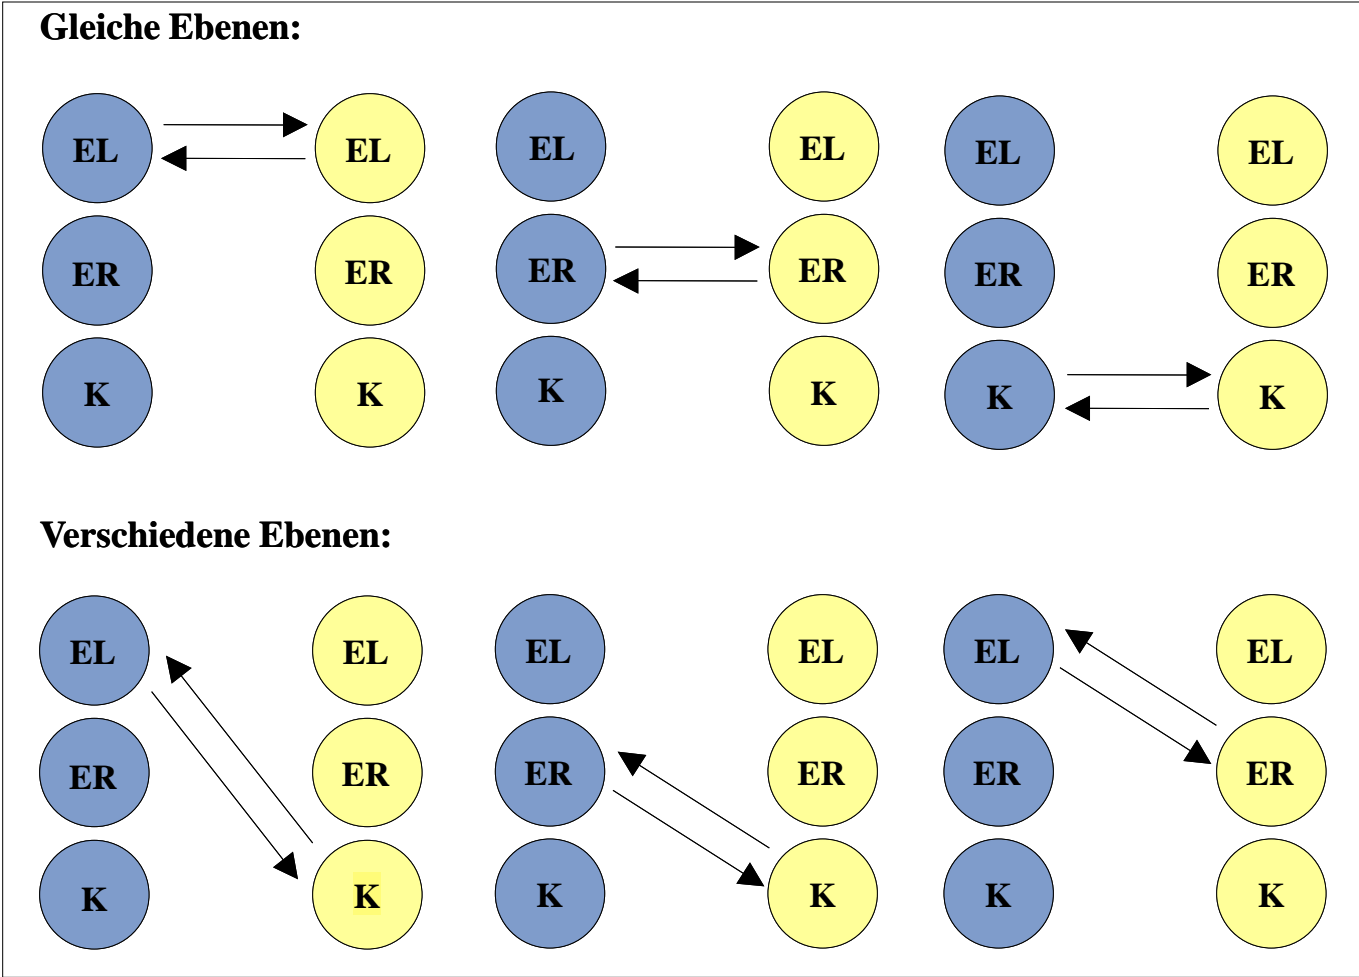

S. 535 Abb. 102

(in Anlehnung an: Klaus, H./Schneider, H. J. : Personalführung. In: Mensch und Arbeit – Taschenbuch für die Personalpraxis, hrsg. von Schneider, H. J., 9. Aufl., Köln 1992, S. 288)

## Überkreuz-Transaktionen

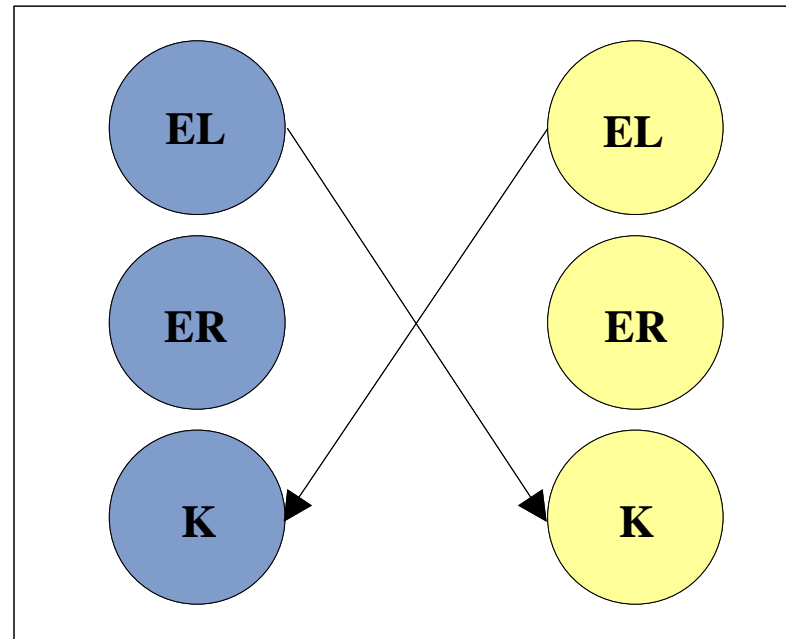

S. 536 Abb. 103

Jung, Hans: Personalwirtschaft, 9. Aufl., München 2010.

© Oldenbourg Wissenschaftsverlag



## Verdeckte Transaktionen

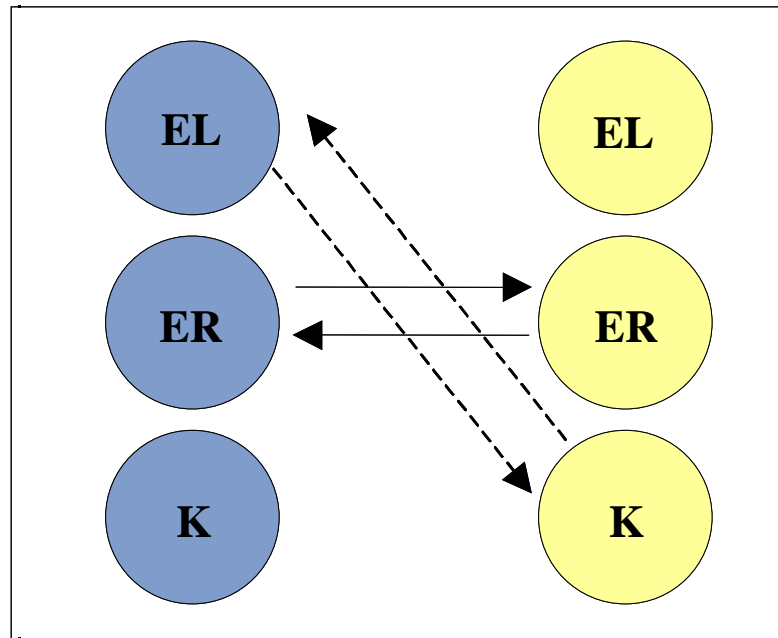

S. 537 Abb. 104

Jung, Hans: Personalwirtschaft, 9. Aufl., München 2010.

© Oldenbourg Wissenschaftsverlag



Lebensanschauungen nach Harris

|                    | Ich bin o.k.                                    | Ich bin nicht o.k.                            |
|--------------------|-------------------------------------------------|-----------------------------------------------|
| Du bist o.k.       | konstruktiv umgehen mit dem Problem/dem anderen | sich zurückziehen von dem Problem/dem anderen |
| Du bist nicht o.k. | Loswerden das Problem/den anderen               | nichts anfangen, steckenbleiben               |

S. 538 Abb. 105  
(in Anlehnung an: Harris, T. A.: Ich bin o.k. – Du bist o.k., Reinbek bei Hamburg 1975, S. 60)

## Die manipulativen Rollen

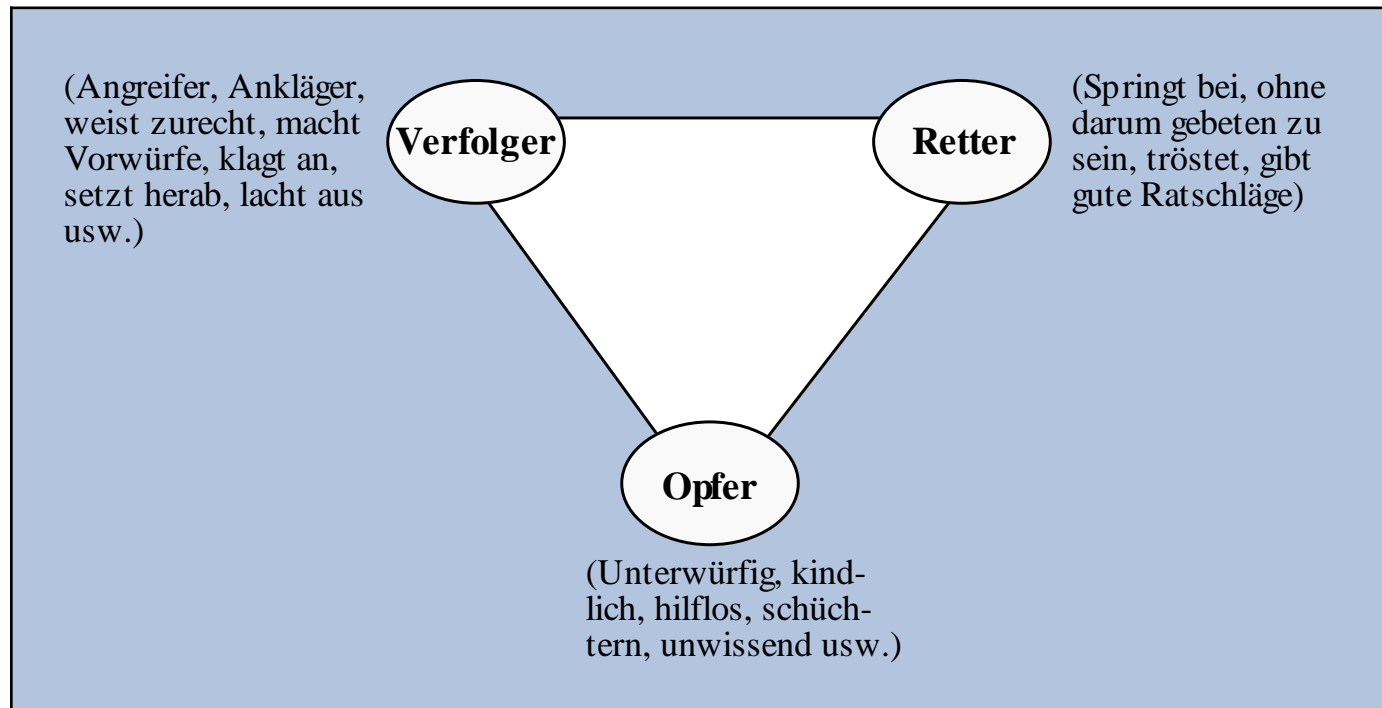

S. 539 Abb. 106

Jung, Hans: Personalwirtschaft, 9. Aufl., München 2010.

© Oldenbourg Wissenschaftsverlag

## Themenzentrierte Interaktion (TZI)

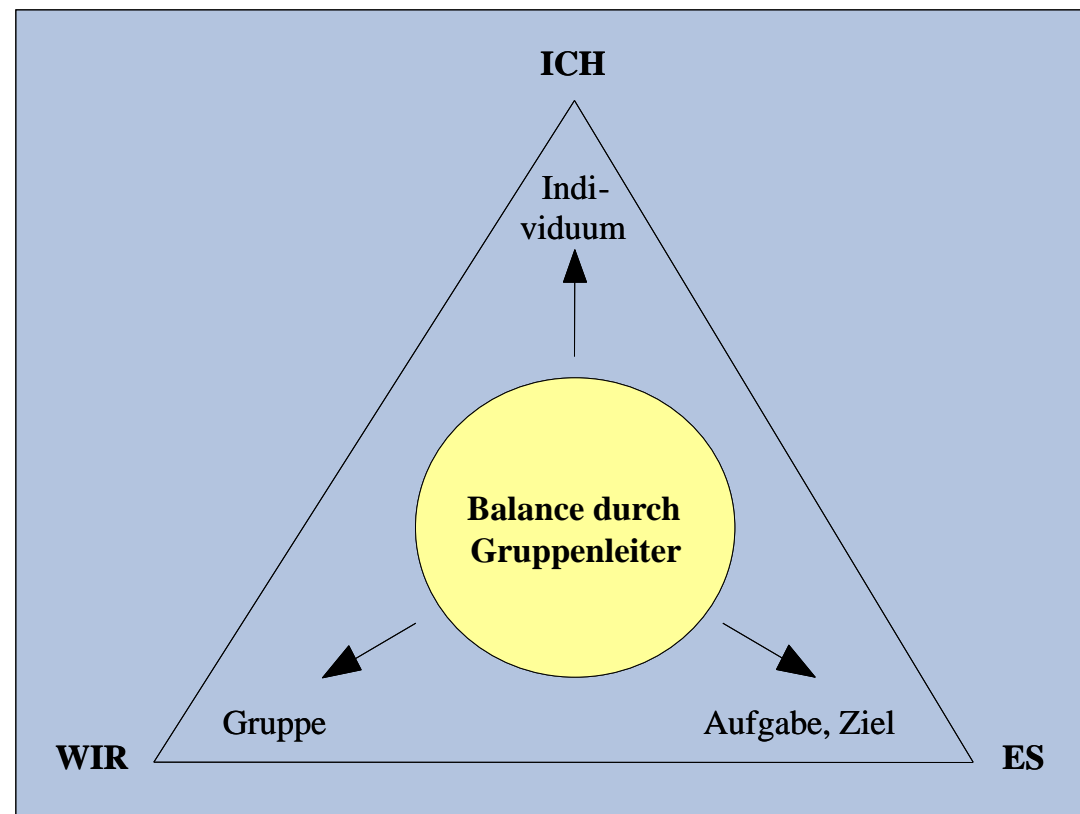

S. 541 Abb. 107

Jung, Hans: Personalwirtschaft, 9. Aufl., München 2010.

© Oldenbourg Wissenschaftsverlag



## Persönlichkeitstypologie (nach Fritz Riemann)

### Die Grundängste

#### **Angst vor Selbsthingabe**

- Wird als Ich-Verlust und Abhängigkeit empfunden

#### **Angst vor Selbstwerdung**

- Wird als Einsamkeit und Isolation empfunden

#### **Angst vor Wandlung**

- wird als Vergänglichkeit und Unsicherheit empfunden

#### **Angst vor Ordnung und Notwendigkeit**

- wird als Endgültigkeit und Unfreiheit empfunden

## Die abgeleiteten Persönlichkeitsstrukturen

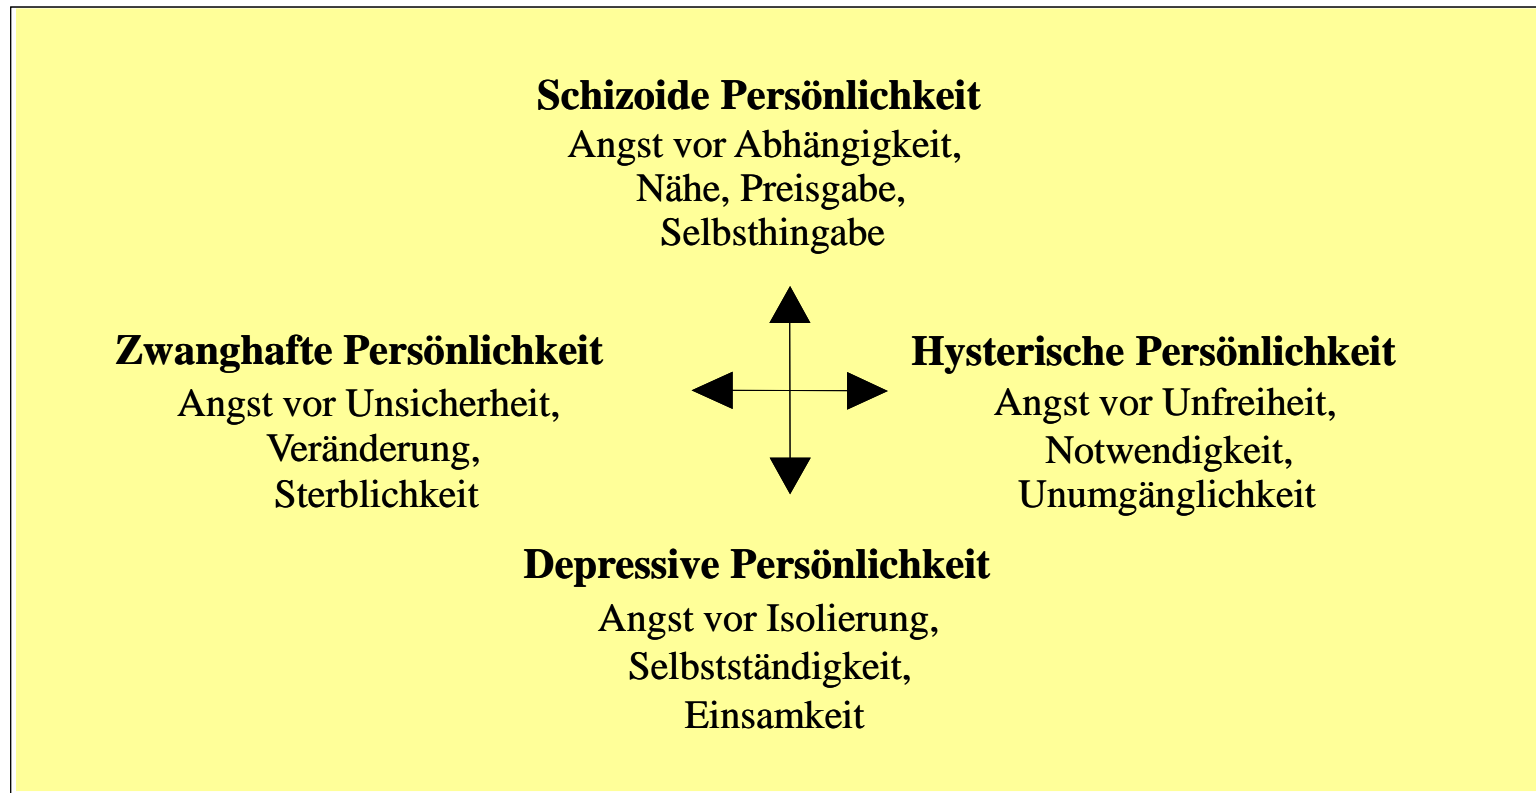

S. 544 Abb. 109

Jung, Hans: Personalwirtschaft, 9. Aufl., München 2010.

© Oldenbourg Wissenschaftsverlag

# Charaktereigenschaften der Persönlichkeitstypen

| <u>Beherrschte (zwanghafte)<br/>Persönlichkeit</u>                                                                                                                                                                                                                 |                                                                                                                                                                                                                                                                  |
|--------------------------------------------------------------------------------------------------------------------------------------------------------------------------------------------------------------------------------------------------------------------|------------------------------------------------------------------------------------------------------------------------------------------------------------------------------------------------------------------------------------------------------------------|
| positiv                                                                                                                                                                                                                                                            | negativ                                                                                                                                                                                                                                                          |
| <ul style="list-style-type: none"> <li>•exakt</li> <li>•pünktlich</li> <li>•systematisch</li> <li>•ausdauernd</li> <li>•fleißig</li> <li>•zuverlässig</li> <li>•ordentlich</li> <li>•genau</li> <li>•verlässlich</li> <li>•korrekt</li> <li>•Vorsichtig</li> </ul> | <ul style="list-style-type: none"> <li>•pingelig</li> <li>•pedantisch</li> <li>•starr</li> <li>•verbissen</li> <li>•streberhaft</li> <li>•langweilig</li> <li>•putzwütig</li> <li>•unflexibel</li> <li>•bieder</li> <li>•doktorär</li> <li>•kleinlich</li> </ul> |

| <u>schizoide Persönlichkeit</u>                                                                                                                                                                                             |                                                                                                                                                                                                                    |
|-----------------------------------------------------------------------------------------------------------------------------------------------------------------------------------------------------------------------------|--------------------------------------------------------------------------------------------------------------------------------------------------------------------------------------------------------------------|
| positiv                                                                                                                                                                                                                     | negativ                                                                                                                                                                                                            |
| <ul style="list-style-type: none"> <li>•konsequent</li> <li>•selbstsicher</li> <li>•distanzfähig</li> <li>•autonom</li> <li>•entscheidungsfreudig</li> <li>•unbeirrbar</li> <li>•kritisch</li> <li>•eigenständig</li> </ul> | <ul style="list-style-type: none"> <li>•intolerant</li> <li>•gleichgültig</li> <li>•kontaktschwach</li> <li>•unsensibel</li> <li>•einsam</li> <li>•störrisch</li> <li>•misstrauisch</li> <li>•abweisend</li> </ul> |

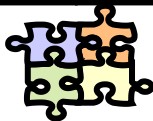

| <u>depressive Persönlichkeit</u>                                                                                                                                                                                                               |                                                                                                                                                                                                                    |
|------------------------------------------------------------------------------------------------------------------------------------------------------------------------------------------------------------------------------------------------|--------------------------------------------------------------------------------------------------------------------------------------------------------------------------------------------------------------------|
| positiv                                                                                                                                                                                                                                        | negativ                                                                                                                                                                                                            |
| <ul style="list-style-type: none"> <li>•resonanzfähig</li> <li>•einfühlsam</li> <li>•kameradschaftlich</li> <li>•kontaktfähig</li> <li>•empfindsam</li> <li>•hilfsbereit</li> <li>•beratend</li> <li>•tolerant</li> <li>•verstehend</li> </ul> | <ul style="list-style-type: none"> <li>•intolerant</li> <li>•gleichgültig</li> <li>•kontaktschwach</li> <li>•unsensibel</li> <li>•einsam</li> <li>•störrisch</li> <li>•misstrauisch</li> <li>•abweisend</li> </ul> |

| <u>lebhaft (hysterische)<br/>Persönlichkeit</u>                                                                                                                                                                                                                   |                                                                                                                                                                                                                                                                                       |
|-------------------------------------------------------------------------------------------------------------------------------------------------------------------------------------------------------------------------------------------------------------------|---------------------------------------------------------------------------------------------------------------------------------------------------------------------------------------------------------------------------------------------------------------------------------------|
| positiv                                                                                                                                                                                                                                                           | negativ                                                                                                                                                                                                                                                                               |
| <ul style="list-style-type: none"> <li>•spontan</li> <li>•gewand</li> <li>•flexibel</li> <li>•einstellungsfähig</li> <li>•risikofreudig</li> <li>•innovationsfreudig</li> <li>•großzügig</li> <li>•mitreißend</li> <li>•überzeugend</li> <li>•anregend</li> </ul> | <ul style="list-style-type: none"> <li>•chaotisierend</li> <li>•oberflächlich</li> <li>•sprunghaft</li> <li>•ablenkbar</li> <li>•leichtsinnig</li> <li>•unstetig</li> <li>•unrealistisch</li> <li>•launisch</li> <li>•flutterhaft</li> <li>•zigeunerhaft</li> <li>•unruhig</li> </ul> |

S. 546 Abb. 110  
(in Anlehnung an: Jung, H.: Persönlichkeitstypologie mit Persönlichkeitstest, 2. Aufl., München/Wien 2000, S. 155)

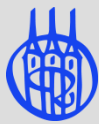

Charaktereigenschaften der Persönlichkeitstypen

|                    | Schizoide Persönlichkeit                                                                                                                                                                                                                                                                                                         | Depressive Persönlichkeit                                                                                                                                                                                                                                                                      |
|--------------------|----------------------------------------------------------------------------------------------------------------------------------------------------------------------------------------------------------------------------------------------------------------------------------------------------------------------------------|------------------------------------------------------------------------------------------------------------------------------------------------------------------------------------------------------------------------------------------------------------------------------------------------|
| Leistungsfähigkeit | <ul style="list-style-type: none"><li>• Leistungsminderung durch fehlenden Aufforderungscharakter der Umwelt</li><li>• Leistungsmangel bei Tätigkeiten mit zwischenmenschlichem Kontakt, wie z.B. Teamarbeit</li><li>• Höchstleistungen werden erbracht, wenn die Persönlichkeitsstruktur noch nicht so ausgeprägt ist</li></ul> | <ul style="list-style-type: none"><li>• keine große Leistungsfähigkeit, bedingt durch die fehlende aggressive Auseinandersetzung mit der Ich-Schwäche</li><li>• ist der Stärkegrad noch nicht so intensiv, dann sind sie leistungsfähig, aber zu angepasst und betont pflichtbewusst</li></ul> |
|                    | Zwanghafte Persönlichkeit                                                                                                                                                                                                                                                                                                        | Hysterische Persönlichkeit                                                                                                                                                                                                                                                                     |
|                    | <ul style="list-style-type: none"><li>• die frühkindliche Überforderung kann zu Arbeitsstörungen führen</li><li>• Leistung nur in eingefahrenen Bahnen</li><li>• keine schöpferische Leistung</li><li>• Höchstleistungen bei geringer Intensität möglich</li></ul>                                                               | <ul style="list-style-type: none"><li>• Leistungsbereitschaft ist personenabhängig</li><li>• Leistungsstärken liegen im Überzeugen und Begeistern</li><li>• Leistungsschwächen liegen in Verantwortlichkeit, Konsequenz und Ausdauer</li></ul>                                                 |

S. 547 Abb. 111  
(in Anlehnung an: Jung, H.: Persönlichkeitstypologie mit Persönlichkeitstest, 2. Aufl., München/Wien 2000, S. 156)



## Das Verhalten der vier Mitarbeitertypen

### Der unabhängige Mitarbeiter

selbstständig, eigenständig, möchte alleine arbeiten, distanziertes Verhalten zur Arbeit, wird schnell aggressiv, kritisiert viel, arrogant, typischer Einzelgänger

### Der beherrschte Mitarbeiter

Furcht vor Veränderung, Ordnungsfanatiker, korrekte Ausführung der Arbeit, unspontan, neigt zum Nach- und Überdenken, Perfektionist, wird mit Aufgaben nicht fertig, die Arbeit an sich befriedigt ihn

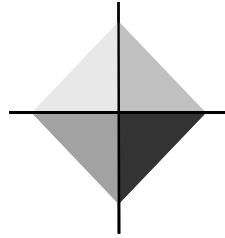

### Der lebhaftige Mitarbeiter

sucht Abwechslung und Spannung, aufgeschlossen, dynamisch, unberechenbar, unpünktlich, will bewundert werden, kontaktfreudig, kreativ, unzuverlässig, wenig Durchhaltevermögen, inkonsequent

### Der fürsorgliche Mitarbeiter

sucht Kontakt zu Kollegen, freundlich, idealisiert andere, identifiziert sich mit Vorgesetzten, bescheiden, friedfertig, passiv, geringes Selbstbewusstsein, geringes Arbeitstempo, Beruf wird zur Berufung

**Einsatzmöglichkeiten der vier Mitarbeitertypen**

**Der unabhängige Mitarbeiter**

keine Gruppenarbeit oder Teamwork, Einzelaufgaben anvertrauen, eignet sich für „Management by Objectives“ und Stabstellen, sachliche und rationelle Tätigkeiten, wenig Kontakt mit Menschen zumuten

**Der beherrschte Mitarbeiter**

eignet sich für bürokratische, hierarchische Organisationen, Einsatz falls hohes Maß an Perfektion und Verantwortung gefordert werden, Einzelarbeit zuteilen, störende Effekte suchen und beseitigen lassen

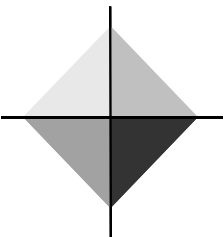

**Der lebhaftige Mitarbeiter**

Einsatz in innovativen, schnelllebigen Bereichen, für Aufbauphase von neuen bzw. Reorganisation von alten Betrieben, Versetzung bei monotoner Arbeit, günstig für PR u.ä., Einsatz zur Motivierung anderer

**Der fürsorgliche Mitarbeiter**

eignet sich zur Gruppenarbeit und zum Teamwork, Kontakt mit Menschen ermöglichen, Einsatz wenn „Not am Manne ist“, Einsatz zur Kundenpflege und -beratung, vermeiden von Konfliktsituationen

## **Führung und Motivation der vier Mitarbeitertypen**

### **Der unabhängige Mitarbeiter**

Abstand halten, sich seiner Aggressivität bewusst sein, bei der Kontaktaufnahme Zeit lassen, sachliches und emotionsfreies Arbeitsverhältnis anstreben, häufig steht Kompetenzmotiv im Vordergrund

### **Der beherrschte Mitarbeiter**

erwarten von der Führungskraft klare Anweisungen, ihm keine häufigen Veränderungen zumuten, seiner Perfektion Grenzen setzen, zur Meinungsäußerung auffordern, häufig Leistungsmotiv ausgeprägt

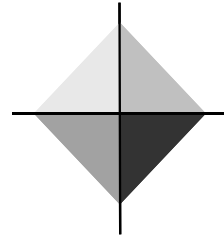

### **Der lebhaftige Mitarbeiter**

überspitzte und traumtänzerische Ideen müssen gebremst werden, sich nicht vom Charme fesseln lassen, Fehler nicht übersehen, Leichtsinn durch frühe Erfolge bremsen, oft Prestigemotiv wichtig

### **Der fürsorgliche Mitarbeiter**

seine hilfsbereite Art nicht ausnutzen, zögerndes "Nein" richtig deuten, nicht zu sehr belasten, sich von Jammern und Klagen nicht irritieren lassen, loben und anerkennen, Geselligkeitsmotiv wichtig



**Persönlichkeiten der vier Managertypen**

**Der unabhängige Manager**

strebt Eigenständigkeit an, arrogant, entschlossfähig, radikal, hält an Meinungen fest, kompromisslos, bevorzugt sachliche und wissenschaftliche Konzepte, trennt Arbeit und Leben, desinteressiert an Unternehmensentwicklung

**Der beherrschte Manager**

geht Veränderungen aus dem Weg, Innovationsfeindlich, korrekt, konservativ, führt Regeln ein, risikoscheu, reißt alle Macht an sich, in Verhandlungen standfest, sucht Sicherheit in Plänen, langatmig

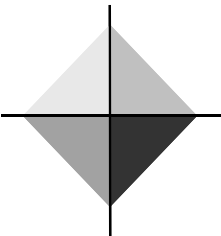

**Der lebhaftige Manager**

allem Neuen zugewendet, verliert schnell das Interesse, routinemäßige Aufgaben werden delegiert, keine genauen Pläne und Konzepte, geringe Selbstdisziplin, "Stehaufmännchen", Imponiergehabe, dominant

**Der fürsorgliche Manager**

großes Harmoniebedürfnis, will alle zufrieden stellen, fühlt sich schnell überfordert, geringes Selbstbewusstsein, Angst vor Erfolg, in Verhandlungen nicht konsequent und hartnäckig genug, unmotiviert, "touchy feely manager"

# Führungsstrategien der vier Managertypen

## Der unabhängige Manager

kein Lob, keine Anerkennung der Leistungen, Leitungsvakuum, kein Teamwork oder Projektarbeiten, Mitarbeiter werden voneinander abgetrennt, kein "Chefzimmer der offenen Tür"

## Der beherrschte Manager

starre, hierarchische Unternehmensordnung, autoritärer, militärischer Führungsstil, Ideen u. Innovationen werden eingeschränkt und abgeblockt, Beschlüsse werden "oben" gefasst, dogmatische Führung

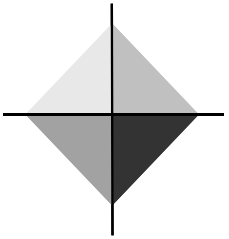

## Der lebhaft Manager

starke Motivation z.B. durch Urkunden und Preise, Macht ist in der Führung gebündelt, keine Beratungs- oder Informationsgespräche, aufgeschlossen gegenüber Innovationen, moderne, neue Führungsstile werden getestet

## Der fürsorgliche Manager

"eine große Familie", Leitungsvakuum, Initiativen werden nicht gefördert, keine Motivation, kooperatives Arbeiten, Teamgeist wird gefördert, Team- und Projektarbeiten, Beziehungs- und Klimapflege

**Auswirkungen der vier Managertypen auf das Unternehmen**

**Der unabhängige Manager**

Fluktuation des Personals, Freude und Motivation fehlen, untergeordnete Mitarbeiter werden aktiv und leiten das Unternehmen mit, Beschlüsse werden aus "politischen" Gründen gefasst, Misstrauen vor der Konkurrenz

**Der beherrschte Manager**

gute Kontrolle, meist gut informiert, Strategien stehen frühzeitig fest, zu autoritäre Führung, Unternehmen ist "überreglementiert", Kreativität der Mitarbeiter verkümmert, Arbeitsmoral sinkt, feste Hierarchie

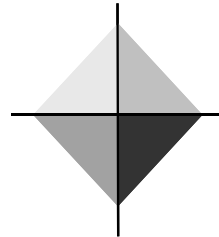

**Der lebhaftige Manager**

alles wird widerspruchslös von den Mitarbeitern ausgeführt, demokratische Entscheidungen fehlen, Personenkult, moderne Führungsmethoden möglich, Fluktuation des Personals, Stimmung abhängig von der Führung

**Der fürsorgliche Manager**

kooperativer Führungsstil, Teamwork, Mitbestimmung, Mitarbeiter fühlen sich unterfordert, Mittelmaß wird angestrebt, Kreativität und Initiative der Mitarbeiter verkümmert, Politik der offenen Tür, "wohltätige" Ausgaben, Sozialleistungen

## Bestandteile und Ziele des Coaching

### Coaching

- ist eine Führungs- und Betreuungsaufgabe des Unternehmens, die häufig auch von direkten Vorgesetzten übernommen wird,
- fördert Elite und Spitzenleistungen, kann nur auf kleine Zielgruppen ausgerichtet sein und benötigt interne oder externe anerkannte Persönlichkeiten zur Durchführung,
- ist Impulsgeber zur Selbsthilfe und hat weniger mit Therapie und psychischen Problemen zu tun,
- benutzt Methoden, die Basis und Schlüsselqualifikationen vermitteln,
- läuft eher partnerschaftlich ab, ist individuell und konzentriert sich nicht auf fachliche Erfahrungen, sondern auf Managementqualifikationen,
- ist ein Prozess zur Bewältigung von Krisen und dient der Persönlichkeitsentwicklung.

S. 551 Abb. 118

(in Anlehnung an: Kienbaum, J./Jochmann, W.: Coaching. Ein Instrumentarium zur Absicherung und Förderung von Karriereentwicklungen. in: Visionäres Personalmanagement, Hrsg. von Kienbaum, J., 2. Aufl., Stuttgart 1994, S. 23.)

Jung, Hans: Personalwirtschaft, 9. Aufl., München 2010.

© Oldenbourg Wissenschaftsverlag



### Gründe für die zunehmende Coaching-Bereitschaft

- Führungstätigkeit wird zunehmend komplexer,
- Mitarbeiter sind anspruchsvoller geworden (Wertewandel),
- Förderung des Führungs- und Managementpotenzial,
- psycho-soziale Beratung wird normale Sache,
- mangelnde Rückkopplung führt zur Vereinsamung und Unsicherheit,
- es gibt professionellere Angebote intern als auch extern.



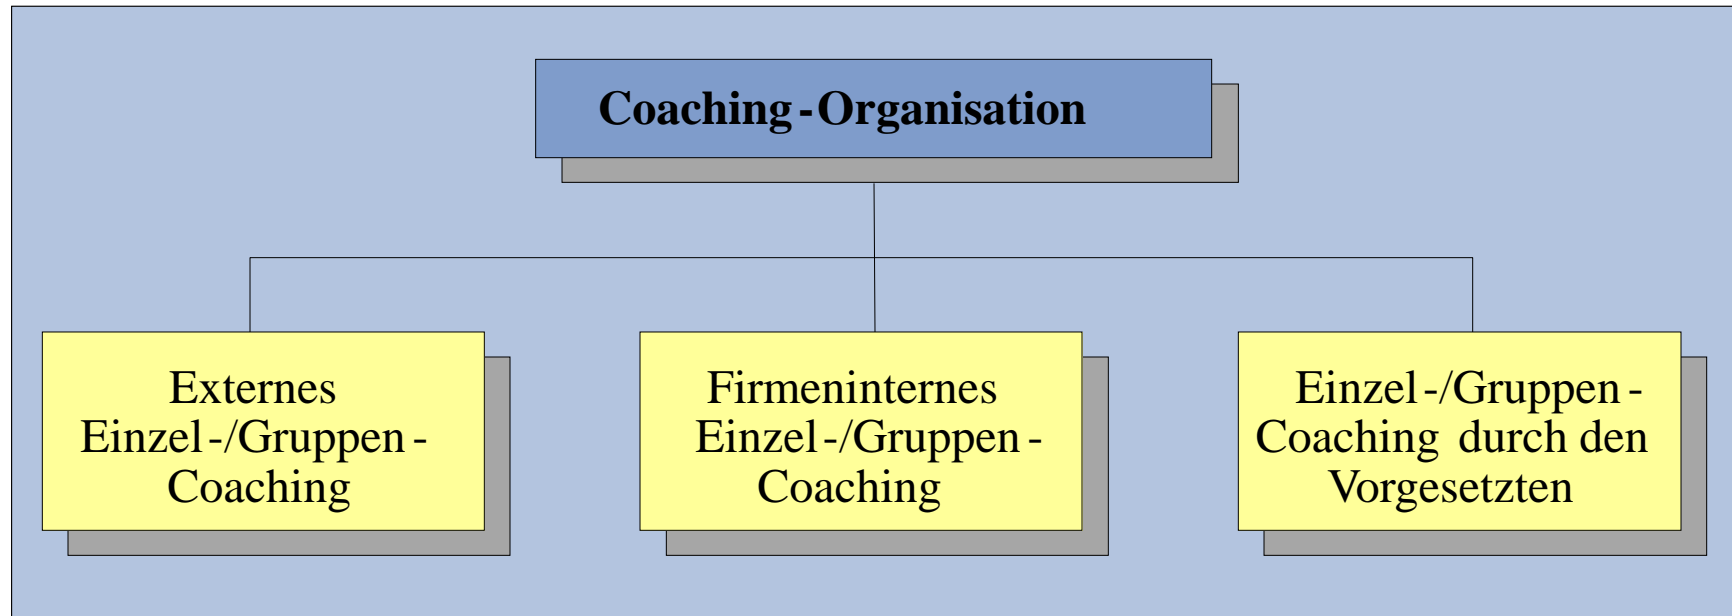



Verschiedene Phasen des Coaching-Prozesses

| Coaching-Prozess      |                                                                                                                                                                                                                                                           |                                                                   |
|-----------------------|-----------------------------------------------------------------------------------------------------------------------------------------------------------------------------------------------------------------------------------------------------------|-------------------------------------------------------------------|
| Phase                 | Inhalt                                                                                                                                                                                                                                                    | Beteiligte                                                        |
| 1. Problemwahrnehmung | <ul style="list-style-type: none"><li>• Misserfolg</li><li>• Konflikte</li><li>• Unzufriedenheit</li></ul>                                                                                                                                                | Einzelne Führungskräfte oder Gruppen ohne Beratung                |
| 2. Problemanalyse     | <ul style="list-style-type: none"><li>• Was stört mich/uns?</li><li>• Wie äußert sich das Empfinden?</li><li>• Welche Ursachen gibt es?</li></ul>                                                                                                         | Einzelne Führungskräfte oder Gruppen mit Coach                    |
| 3. Lösungssuche       | <ul style="list-style-type: none"><li>• Welche Verhaltensweisen sollen aufgegeben oder verändert werden?</li><li>• Wie gehe ich/wir vor?</li><li>• Festlegen des Zeitrahmens, der Feedbacksicherung</li><li>• Mit wem arbeite ich/wir zusammen?</li></ul> | Einzelne Führungskräfte oder Gruppen, Coach und Betroffene        |
| 4. Umsetzungsphase    | <ul style="list-style-type: none"><li>• Verändertes, neues Verhalten wird angewendet, erprobt</li></ul>                                                                                                                                                   | Einzelne Führungskräfte oder Gruppen mit Coach oder ohne Beratung |
| 5. Evaluierungsphase  | <ul style="list-style-type: none"><li>• Welches Verhalten hat sich bewährt?</li><li>• Welches Verhalten passt zu mir/uns?</li><li>• Was soll beibehalten/verändert werden?</li><li>• Wird das Coaching beendet/fortgesetzt?</li></ul>                     | Einzelne Führungskräfte oder Gruppen, Coach und Betroffene        |

S. 557 Abb. 121  
(in Anlehnung an: Becker, M.: Personalentwicklung. Die personalwirtschaftlichen Herausforderungen der Zukunft, Bad Homburg 1993, S. 291)

Jung, Hans: Personalwirtschaft, 9. Aufl., München 2010.

© Oldenbourg Wissenschaftsverlag

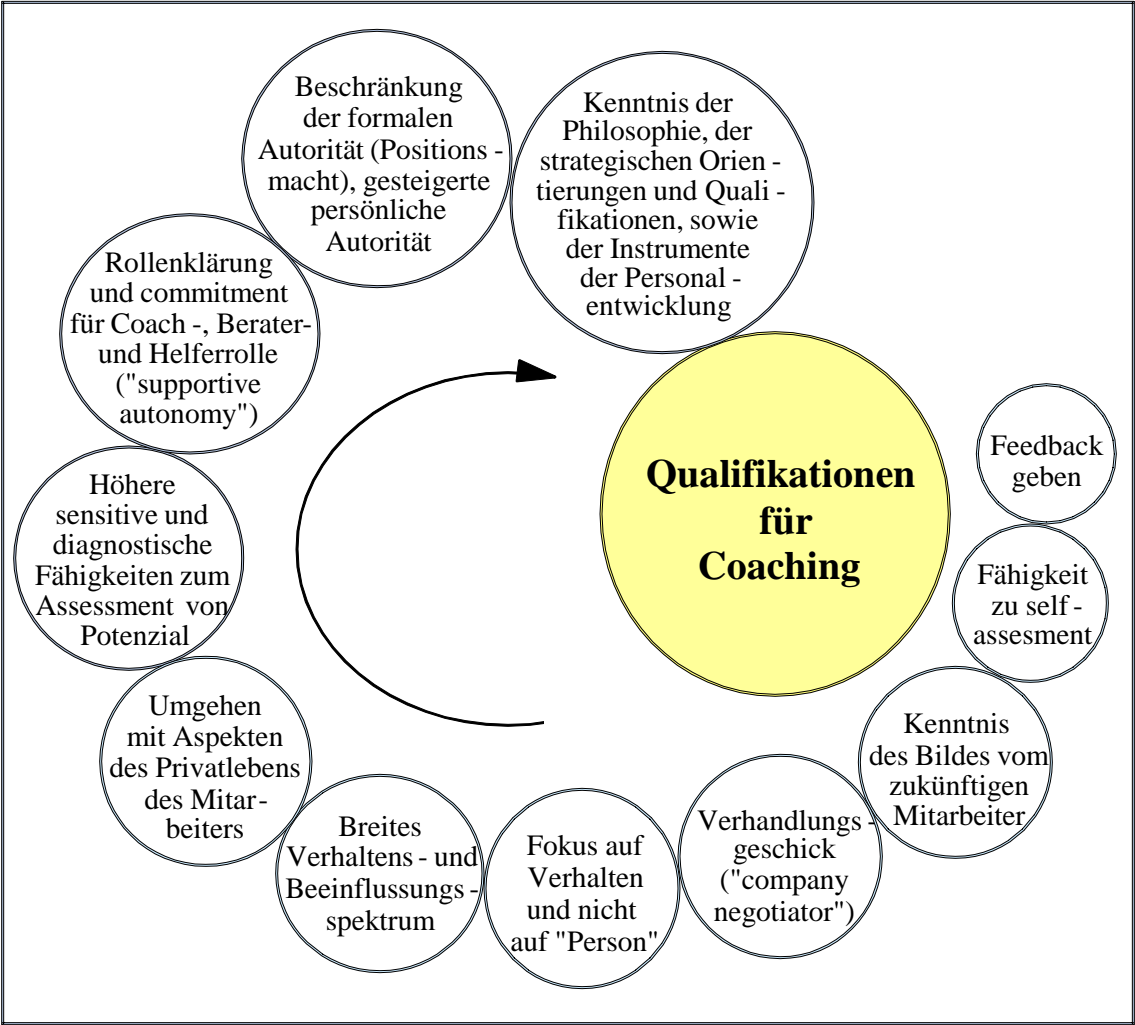

S. 558 Abb. 122

(in Anlehnung an: Sattelberger T.: Personalentwicklung als strategischer Erfolgsfaktor, in: Innovative Personalentwicklung, Hrsg. von Sattelberger, T., 2. Aufl., Wiesbaden 1991, S. 36)



### Kritik am Coaching-Konzept

- Unseriöse "Trittbrettfahrer" aus der Berater-Szene fungieren als Coach.
- Führungskräfteentwicklung als nicht delegierbare Aufgabe des Managers muss in und mit der Arbeitsorganisation bewältigt werden.
- Vermarktung von Coaching ist oft Vermarktung von "altem Wein in neuen Schläuchen".
- Helfende Unterstützung sollte nicht gleich extern "gekauft" werden, sondern in der Organisation stattfinden.

S. 559 Abb. 123

(in Anlehnung an: Becker, M.: Personalentwicklung. Die personalwirtschaftlichen Herausforderungen der Zukunft, Bad Homburg 1993, S. 291 f.)

Jung, Hans: Personalwirtschaft, 9. Aufl., München 2010.

© Oldenbourg Wissenschaftsverlag

## 3. Betriebliche Anreizsysteme

- 3.1 Die Bestandteile des Arbeitsentgeltes
- 3.2 Die Arbeitsbewertung
- 3.3 Lohnform
- 3.4 Der neue Entgelt-Rahmentarif (ERA)
- 3.5 Betriebliche Sozialleistungen
- 3.6 Mitarbeiterbeteiligungen
- 3.7 Motivationsfördernde Arbeitsorganisation

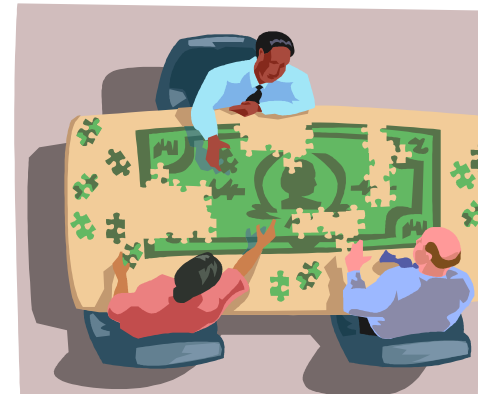



## Bestandteile des Arbeitsentgeltes

Unternehmensinterne Anreizsysteme versuchen die verschiedenen menschlichen Bedürfnisse durch bestimmte Anreize zu befriedigen. Diese Anreize können in

- **materielle** und in
- **immaterielle Anreize** gegliedert werden

Die wichtigste Gruppe der materiellen Anreize sind die **monetären Zahlungen**.

Sie sind die Gegenleistung für die Leistung des Arbeitnehmers an der betrieblichen Wertschöpfung. Sie setzen sich aus **Lohn-** und **Gehaltszahlungen** und aus **betrieblichen Sozialleistungen** und **Erfolgsbeteiligungen** zusammen

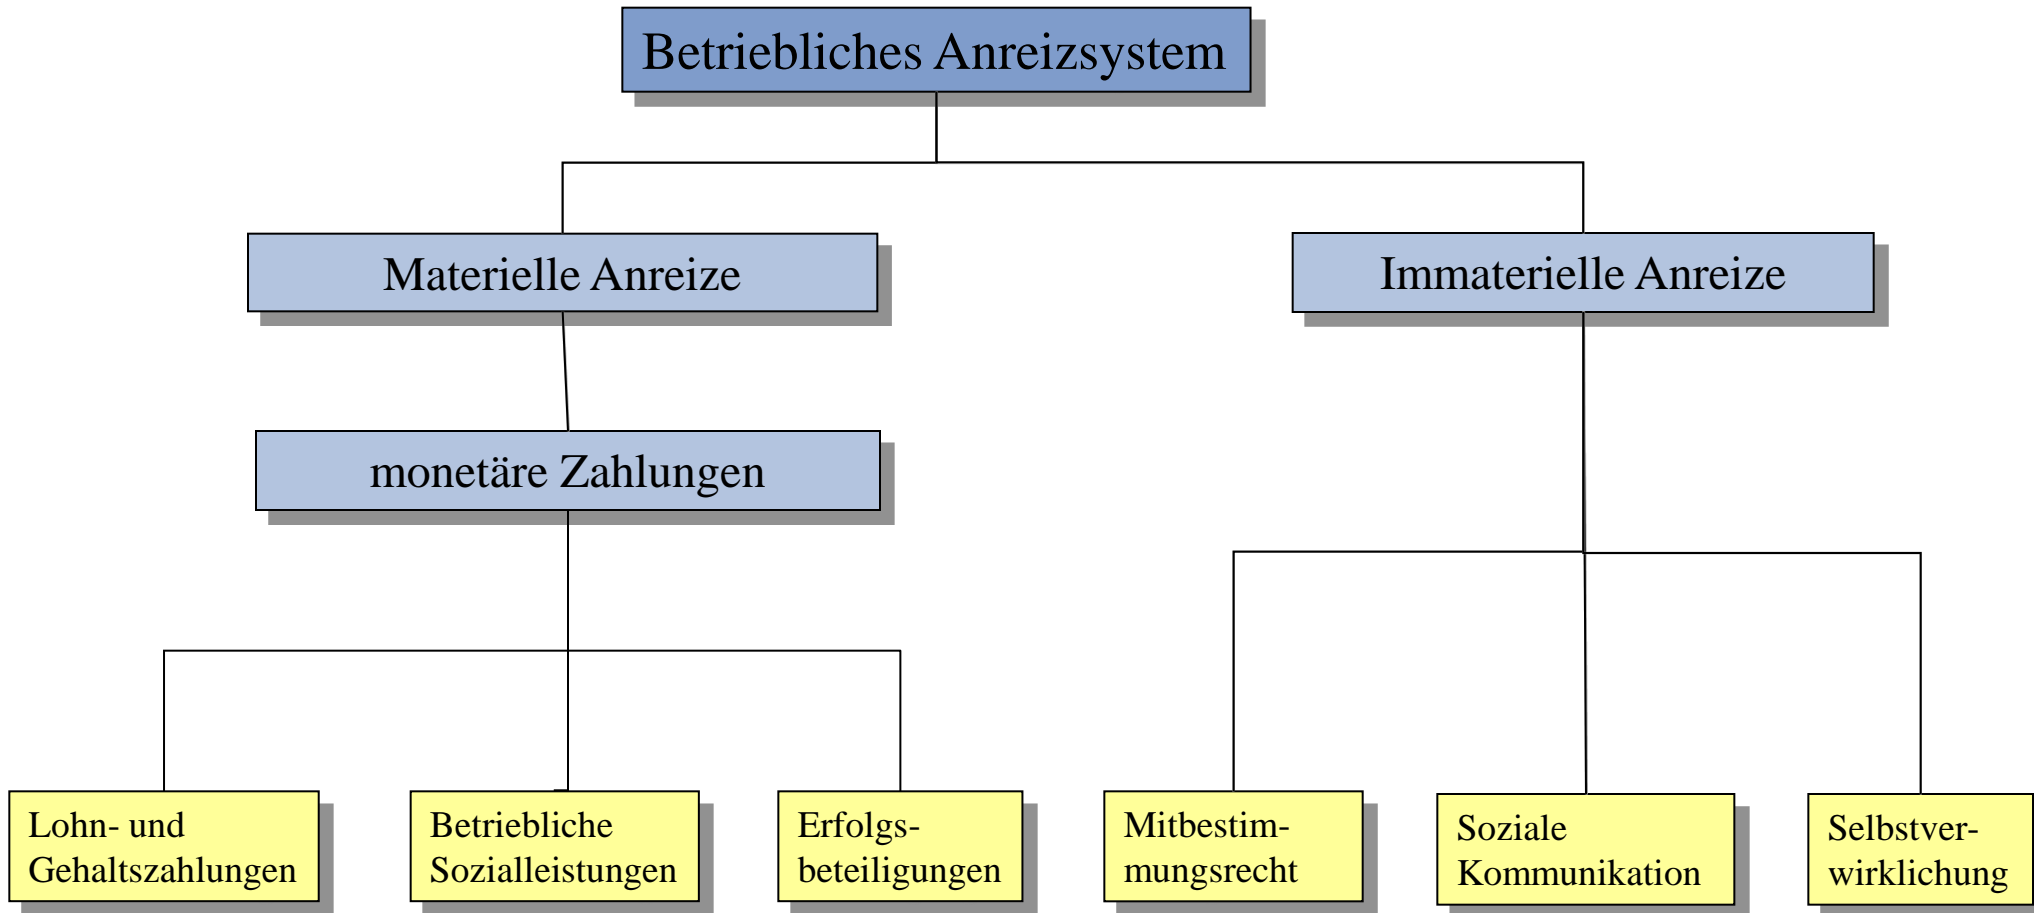

## Bestandteile des Arbeitsentgeltes

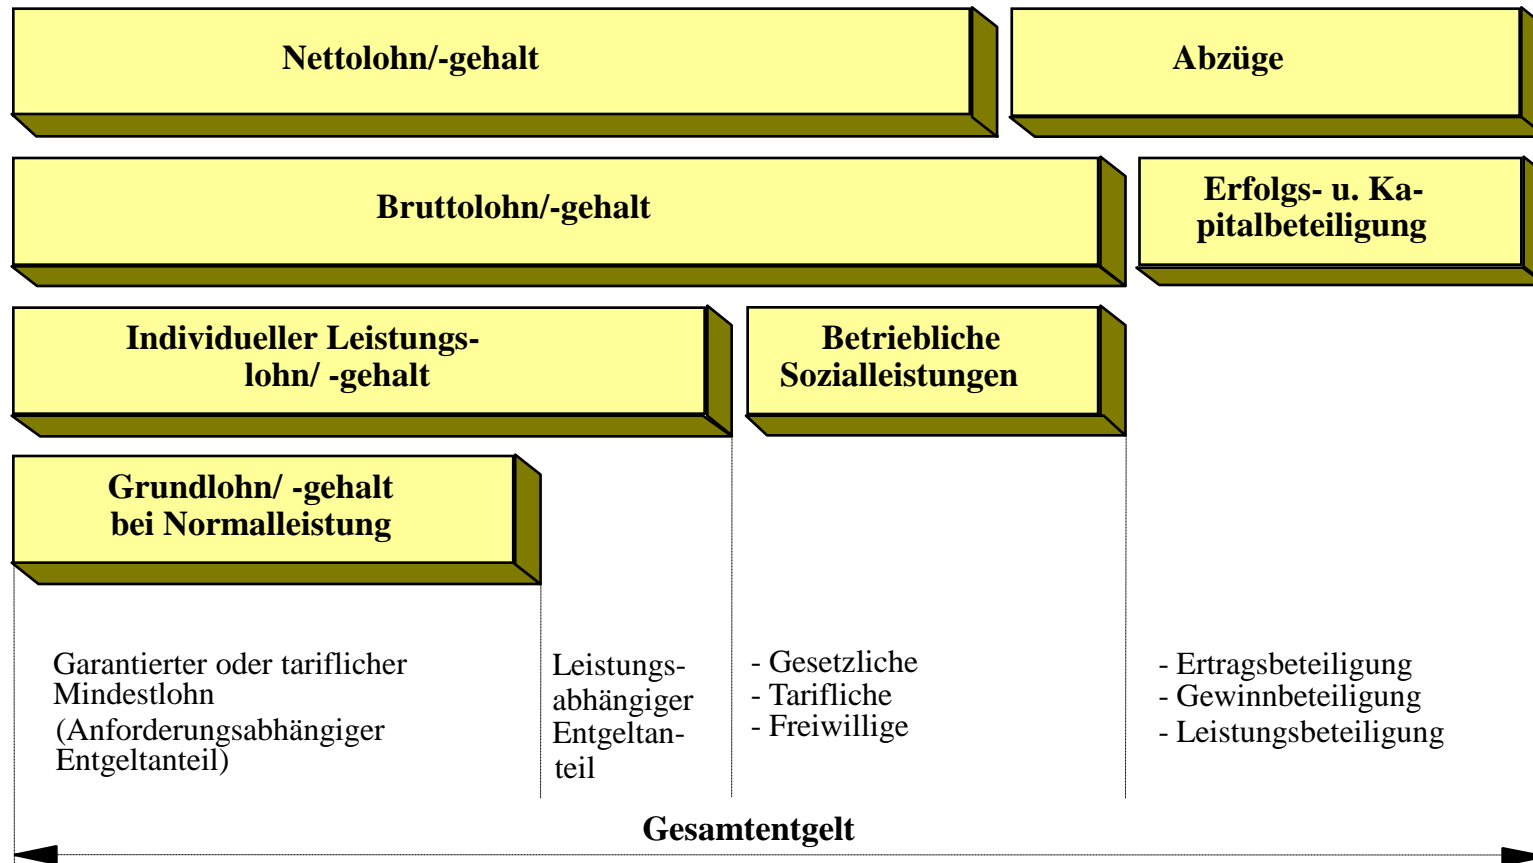

S. 562 Abb. 124





## Hauptprobleme der Entgeltpolitik

### Die Bestimmung der absoluten und relativen Lohnhöhe

- Die **absolute Lohnhöhe** ist der Geldbetrag, den der Arbeitnehmer für seine nach Art und Umfang bestimmte Arbeitsleistung erhält.

Hierbei wird das Verteilungsproblem der Zurechnung der Wertschöpfung auf die Arbeitnehmer und Kapitaleigner angesprochen.

- Die **relative Lohnhöhe** betrifft die Bestimmung der Verhältnisse der Einzellöhne untereinander, also die Festlegung der Höhe der Entlohnung für eine Tätigkeit im Verhältnis zu anderen Tätigkeiten.

## Ansätze für eine gerechte Entlohnung

Insgesamt wird ein **Lohnsystem** angestrebt, welches einerseits als möglichst gerecht und fair empfunden wird und andererseits leistungsfördernd wirkt.

Die **Lohngerechtigkeit** ist jedoch ein ethischer Wert und es ist schwierig, Kriterien festzulegen, die bei der Lohnfindung allen Arbeitnehmern gerecht werden.

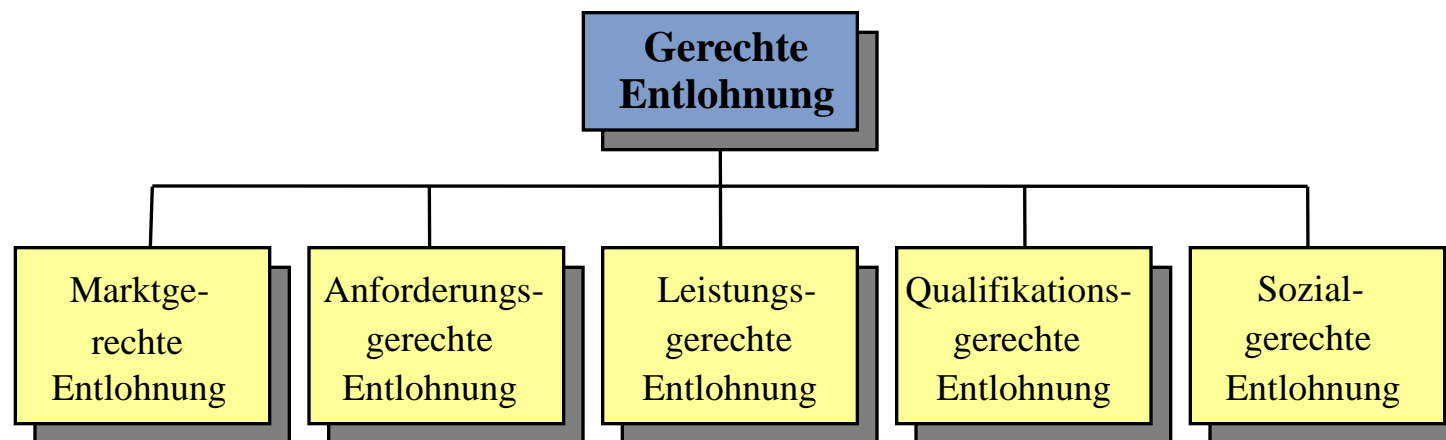



## Arbeitsbewertung:

Ist die Ermittlung der Anforderungen, die eine Arbeit bei normaler Leistung an einen Mitarbeiter stellt. Die Höhe dieser Anforderungen wird allgemein als „**Arbeitswert**“ bezeichnet.

**Der Schwierigkeitsgrad einer Tätigkeit gilt als Maßstab für die relative Einstufung des Arbeitswertes einer Tätigkeit im Vergleich zu den Arbeitswerten anderen Tätigkeiten und bestimmt somit die relative „Lohnhöhe“.**

## Lohnformen:

Die Lohnform berücksichtigt die individuelle Leistung eines Mitarbeiters auf einem durch die Arbeitsbewertung ermittelten Niveau.



Arbeitsbewertungsverfahren

| <div>Methoden der<br/>qualitativen<br/>Analyse</div> <div>Methoden der<br/>Quantifizierung</div> | <div>summarisch</div> <div>(Gesamtbewertung<br/>der Tätigkeit)</div> | <div>analytisch</div> <div>(Teilbewertung und Ge-<br/>wichtung einzelner<br/>Anforderungsarten)</div> |
|--------------------------------------------------------------------------------------------------|----------------------------------------------------------------------|-------------------------------------------------------------------------------------------------------|
| <div>Reihung</div> <div>(Sortieren nach dem<br/>Schwierigkeitsgrad<br/>der Tätigkeit)</div>      | <div>Rangfolgeverfahren</div>                                        | <div>Rangreihenverfahren</div>                                                                        |
| <div>Stufung</div> <div>(Einsortieren in<br/>Festgelegte Gruppen)</div>                          | <div>Lohngruppenverfahren</div>                                      | <div>Stufenwertzahlverfahren</div>                                                                    |

S. 566 Abb. 126



## Rangfolgeverfahren

Beim Rangfolgeverfahren werden sämtliche Arbeitsplätze eines Unternehmens aufgelistet und anschließend durch vergleichendes Schätzen nach sinkenden Schwierigkeitsgraden in eine Rangfolge gebracht. Dabei stehen zwei Verfahren zur Verfügung:

1. **Spielkartensortiermethode**, bei der in einem ersten Schritt die Arbeiten einer Abteilung eines Unternehmens auf Karten geschrieben und nach Schwierigkeit sortiert werden und in einem zweiten Schritt die Arbeiten aller anderen Abteilungen in die Schwierigkeitsskala dieser "Vergleichsabteilung" einrangiert werden.
2. **Paarweiser Vergleich**, bei dem alle Arbeiten unmittelbar auf Karten erfasst werden und bei einem Paarweisen Vergleich jeweils die schwieriger einzustufende Arbeit mit einem Zeichen versehen wird. Die Rangfolge ergibt sich am Ende des Vergleichs durch die Anzahl der Kennzeichnungen auf jeder Karte.



## Rangfolgeverfahren

### Vorteile:

- Einfache Handhabung
- Leichte Verständlichkeit

### Nachteile:

- Keine Aussage über Abstände zwischen den einzelnen Rängen
- Fehlender Beurteilungsmaßstab und somit Gefahr von Fehlerbewertungen bei wachsender Betriebsgröße
- Hohe Anzahl von Paarvergleichen

Die Anwendbarkeit des Rangfolgeverfahrens ist auf kleine Unternehmen mit gleichartigen Arbeitsplätzen beschränkt

## Lohngruppenverfahren

### **Lohngruppe 1:**

Einfache Arbeiten, die ohne jegliche Ausbildung nach einer Unterweisungszeit von in der Regel drei Tagen ausgeführt werden können.

### **Lohngruppe 2:**

Einfache Arbeiten, die eine geringe Sach- und Arbeitskenntnis verlangen, aber ohne jegliche Ausbildung nach einer Unterweisungszeit von bis zu 1 Monat und einer entsprechenden Einarbeitungszeit ausgeführt werden können oder einfache Arbeiten der Lohngruppe 1 mit über-wiegend zusätzlich belastenden Arbeitsbedingungen.

### **Lohngruppe 3:**

Arbeiten, die eine Zweckausbildung oder ein systematisches Anlernen bis zu 6 Monaten, eine entsprechende Fertigkeit, Übung und Erfahrung verlangen, oder einfache Arbeiten der Lohngruppe 2 mit überwiegend zusätzlich belastenden Arbeitsbedingungen.

### **Lohngruppe 4:**

Arbeiten, die ein Teilfacharbeiterkönnen verlangen, wie es durch eine abgeschlossene Anlernausbildung oder durch eine Zweckausbildung bzw. ein schematisches Anlernen mit zusätzlicher Berufserfahrung erzielt wird oder Arbeiten der Lohngruppe 3 mit überwiegend zusätzlich belastenden Arbeitsbedingungen.

S. 568 Abb. 127A

(Fortsetzung)

**Lohngruppe 5:**

**Facharbeiten, die berufliche Handfertigkeiten und Berufskenntnisse verlangen, wie sie entweder durch eine fachentsprechende, ordnungsgemäße Berufsausbildung oder durch eine abgeschlossene Anlernausbildung und zusätzliche Berufserfahrung erzielt werden.**

**Lohngruppe 6:**

Schwierige Facharbeiten, die besondere Fähigkeiten und langjährige Berufserfahrung verlangen.

**Lohngruppe 7:**

Besonders schwierige und hochwertige Facharbeiten, die an das fachliche Können und Wissen besonders hohe Anforderungen stellen sowie Selbständigkeit und hohes Verantwortungsbewusstsein voraussetzen.

**Lohngruppe 8:**

Hochwertigste Facharbeiten, die meisterliches Können, absolute Selbständigkeit, Dispositionsvermögen, umfassendes Verantwortungsbewusstsein und entsprechende theoretische Kenntnisse erfordern.





## Beschreibung von Gehaltsgruppen

### **Gehaltsgruppe 1a:**

Tätigkeiten einfacher, schematischer, gleichbleibender Art, für die der Ablauf und die Ausführung festgelegt sind.

### **Gehaltsgruppe 1b:**

Tätigkeiten einfacher, aber unterschiedlicher Art, für die Ablauf und Ausführung weitgehend festgelegt sind.

### **Gehaltsgruppe 2:**

Tätigkeiten unterschiedlicher Art, die nach Anweisung ausgeübt werden.

### **Gehaltsgruppe 3:**

1. Tätigkeiten schwieriger Art, die nach allgemeinen Anweisungen in beachtlichem Umfang selbstständig ausgeführt werden.
2. Meistertätigkeiten, die nach allgemeinen Anweisungen in beachtlichem Umfang selbstständig ausgeführt werden und mit Verantwortung für die Arbeitsleistung unterstellter Arbeitnehmer verbunden ist.

### **Gehaltsgruppe 4:**

1. Tätigkeiten schwieriger Art, die nach allgemeinen Anweisungen selbstständig ausgeführt werden.
2. Meistertätigkeiten, die nach allgemeinen Anweisungen selbstständig ausgeführt werden, mit Führungsaufgaben und fachlicher Verantwortung für die unterstellten Arbeitnehmer und/oder Auszubildenden. Hierzu können auch Arbeitnehmer mit Vorgesetztenfunktion zählen.

S. 570 Abb. 128A

Quelle: IG Metall: Daten, Fakten, Informationen 2009, S. 20

Jung, Hans: Personalwirtschaft, 9. Aufl., München 2010.

© Oldenbourg Wissenschaftsverlag



**Gehaltsgruppe 5:**

1. Tätigkeiten erhöht schwieriger Art, die nach Richtlinien selbstständig ausgeführt werden und Entscheidungen in eigener Verantwortung zulassen.
2. Meistertätigkeiten, die in einem größeren Arbeitsbereich nach Richtlinien selbstständig ausgeführt werden, mit Führungsaufgaben und fachlicher Verantwortung für die unterstellten Arbeitnehmer und/oder Auszubildenden. Hierzu können auch Arbeitnehmer mit Vorgesetztenfunktion, einschließlich anderer Meister, zählen.

**Gehaltsgruppe 6:**

1. Tätigkeiten sehr schwieriger Art, die nach allgemeinen Richtlinien selbstständig ausgeführt werden und in eigener Verantwortung Entscheidungen von erheblicher Bedeutung für den Betriebs- oder Geschäftsablauf in einem Arbeitsbereich einschließen und/oder Grundlagen für derartige Entscheidungen liefern.
2. Meistertätigkeiten, die in großen, vielseitigen oder mehreren Arbeitsbereichen in der Regel mit unterstellten Meistern nach allgemeinen Richtlinien selbstständig ausgeführt werden, mit Führungsaufgaben und fachlicher Verantwortung für die unterstellten Arbeitnehmer und/oder Auszubildenden.

**Gehaltsgruppe 7:**

Tätigkeiten hochqualifizierter Art, die nach allgemeinen Richtlinien selbstständig ausgeführt werden und in eigener Verantwortung Entscheidungen von erheblicher Bedeutung für den Betriebs- oder Geschäftsablauf auch in angrenzenden Arbeitsbereichen einschließen und/oder Grundlagen für derartige Entscheidungen liefern.

S. 570 Abb. 128B

Quelle: IG Metall: Daten, Fakten, Informationen 2009, S. 20

**Jung, Hans: Personalwirtschaft, 9. Aufl., München 2010.**

© Oldenbourg Wissenschaftsverlag



## Richtbeispiele für Tätigkeiten der Lohngruppe 5:

- Drehen schwierig zu spannender Werkstücke bei mittlerer Oberflächengüte und kleinen Stückzahlen an selbständig eingerichteten Drehmaschinen.
- Zusammenbau kompletter Geräte und Baugruppen nach Zeichnung oder Muster in Einzel- oder Kleinserienfertigung.
- Führen von Personen-, Liefer- und Lastkraftwagen, wenn der Fahrer kleine Störungen beseitigt.
- Schlosserfacharbeiten, die die nach Zeichnungen oder sonstigen Angaben auszuführen sind wie Pass- oder Zurichtearbeiten oder selbständiger Zusammenbau vollständiger Baugruppen.
- Schwierige, besondere Aufmerksamkeit erfordernde Arbeiten in der Fließfertigung.
- Umfangreiche Lichtbogen- und Autogenschweißarbeiten an vorgerichteten und zusammengepassten Werkstücken unter erschwerenden Umständen, bei denen saubere, gut durchgeschweißte und dichtgelegte Nähte in festgelegter Reihenfolge zu ziehen sind.



## Lohngruppenverfahren

### Vorteile:

- Einfache Durchführung
- Leichte Verständlichkeit
- Wirtschaftliche Arbeitsweise

### Nachteile:

- Praktikabilität stark abhängig von der exakten Definition der Lohngruppenmerkmale ( → Fehltritteile)
- Richtbeispiele veralten durch technischen Fortschritt sehr schnell

In Tarifverträgen wird das Lohngruppenverfahren sehr häufig genutzt



# Die Umsetzung der Lohngruppen in Entgelte

## Lohnkurve der Berliner Metallindustrie

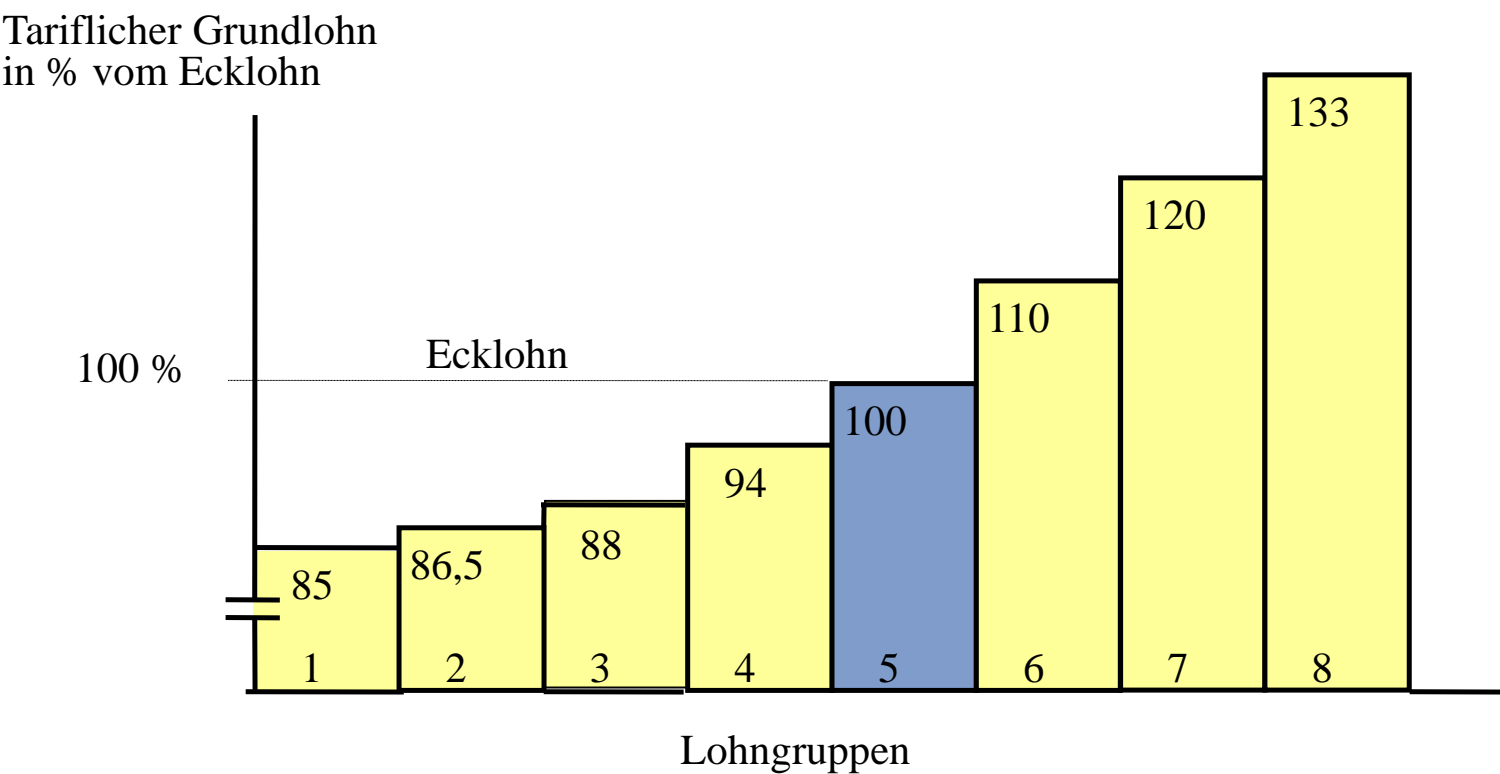

S. 571 Abb. 129  
Quelle: IG Metall: Daten, Fakten, Informationen 2009, S. 37



Lohngruppenrelation, Stand Juni 2009

| Tarifgebiet                                                               | Prozentsatz in der Lohngruppe |      |      |      |      |      |     |                  |       |       |       |     |
|---------------------------------------------------------------------------|-------------------------------|------|------|------|------|------|-----|------------------|-------|-------|-------|-----|
|                                                                           | 1                             | 2    | 3    | 4    | 5    | 6    | 7   | 8                | 9     | 10    | 11    | 12  |
| Bayern*                                                                   | 82,9                          | 83   | 88   | 88   | 90,5 | 97   | 100 | 110              | 120   | 133   |       |     |
| Berlin/Brandenbg.                                                         | 85                            | 86,5 | 88   | 94   | 100  | 110  | 120 | 133              |       |       |       |     |
| Hamburg                                                                   |                               | 86   | 87,5 | 91   | 95   | 100  | 108 | 118              | 133   |       |       |     |
| Niedersachsen                                                             | 85                            | 85   | 86,3 | 88,6 | 90,5 | 94,5 | 100 | 110              | 120   | 133   |       |     |
| Nordrhein-Westfalen <sup>2</sup>                                          |                               | 85   | 86   | 88   | 92   | 96   | 100 | 108              | 118   | 133   |       |     |
| Nordwestliches<br>Niedersachsen                                           |                               | 86   | 87,5 | 90   | 95   | 100  | 110 | 116 <sup>1</sup> | 133   |       |       |     |
| Nordwürttemberg/Nord<br>baden*                                            | 85                            | 85   | 86,4 | 87,7 | 90,9 | 94,9 | 100 | 106,9            | 113,8 | 120,7 | 127,8 | 135 |
| Saarland                                                                  | 84                            | 86,3 | 88,5 | 93,5 | 100  | 110  | 120 | 133              |       |       |       |     |
| Sachsen                                                                   | 82,9                          | 83   | 88   | 88   | 90,5 | 97   | 100 | 110              | 120   | 133   |       |     |
| Schleswig-Holstein                                                        |                               | 86   | 87,5 | 93   | 96   | 100  | 108 | 117              | 133   |       |       |     |
| Thüringen                                                                 |                               | 84   | 86,3 | 88,5 | 93,5 | 100  | 110 | 120              | 133   |       |       |     |
| 1) Oldenburg = 120 %      2) Altersabschläge im Zeitlohn      *)errechnet |                               |      |      |      |      |      |     |                  |       |       |       |     |

S. 572 Abb. 130

Quelle: IG Metall: Daten, Fakten, Informationen 2009, S. 44 f.

Jung, Hans: Personalwirtschaft, 9. Aufl., München 2010.

© Oldenbourg Wissenschaftsverlag



**Zeitlicher Vergleich der Lohnspanne zwischen unterster und 100%-Gruppe (Ecklohn)**

| Unterste Lohngruppe im Vergleich zur 100% - Gruppe (Metallindustrie 2009) |             |             |             |             |             |
|---------------------------------------------------------------------------|-------------|-------------|-------------|-------------|-------------|
| Tarifgebiet                                                               | 1950<br>[%] | 1960<br>[%] | 1970<br>[%] | 1990<br>[%] | 2009<br>[%] |
| Bayern                                                                    | 62,5        | 67          | 75          | 76          | 82,9        |
| Nordrhein-Westfalen                                                       | 58,7        | 70          | 75          | 82          | 85          |
| Schleswig-Holstein                                                        | 63          | 72,5        | 72,5        | 82          | 86          |

S. 573 Abb. 131

Quelle: IG Metall: Daten, Fakten, Informationen 2009, S. 43

Jung, Hans: Personalwirtschaft, 9. Aufl., München 2010.

© Oldenbourg Wissenschaftsverlag



Anforderungsgruppen nach dem Genfer Schema

|                           | Können                                                                                                                                              | Belastung                                                                                                                                                                           |
|---------------------------|-----------------------------------------------------------------------------------------------------------------------------------------------------|-------------------------------------------------------------------------------------------------------------------------------------------------------------------------------------|
| Geistige Anforderungen    | <ul style="list-style-type: none"><li>• Fachkenntnisse</li><li>• Berufserfahrung</li><li>• Befähigung, fachlich zu denken und zu Urteilen</li></ul> | <ul style="list-style-type: none"><li>• Nachdenken</li><li>• Aufmerksamkeit</li><li>• Angestregtes Beobachten</li></ul>                                                             |
| Körperliche Anforderungen | <ul style="list-style-type: none"><li>• Geschicklichkeit</li><li>• Handfertigkeit</li></ul>                                                         | <ul style="list-style-type: none"><li>• Überwindung von Arbeitswiderständen (dynamische Belastung) der Muskeln</li><li>• Arbeitshaltung (statische Belastung der Muskeln)</li></ul> |
| Verantwortung             |                                                                                                                                                     | <ul style="list-style-type: none"><li>• Verantwortungsbewusstes Arbeiten, um persönliche und sachliche Schäden zu vermeiden</li></ul>                                               |
| Arbeitsbedingungen        |                                                                                                                                                     | <ul style="list-style-type: none"><li>• Anforderungen, die den Organismus zusätzlich belasten und denen er passiv entspricht (Temperatur, Nässe, Lärm etc.)</li></ul>               |

S. 574 Abb. 132





Nachteile zu weniger und zu vieler Anforderungsarten

| Zu wenige Anforderungsarten                                                                                                                                                                                                                                                                                                                                                                                                                                                                                                                                                                                            | Zu viele Anforderungsarten                                                                                                                                                                                                                                                                                                                                                                                                                                                                                                |
|------------------------------------------------------------------------------------------------------------------------------------------------------------------------------------------------------------------------------------------------------------------------------------------------------------------------------------------------------------------------------------------------------------------------------------------------------------------------------------------------------------------------------------------------------------------------------------------------------------------------|---------------------------------------------------------------------------------------------------------------------------------------------------------------------------------------------------------------------------------------------------------------------------------------------------------------------------------------------------------------------------------------------------------------------------------------------------------------------------------------------------------------------------|
| <ul style="list-style-type: none"><li>- Der Begriffsinhalt der Merkmale ist so weit gefasst, dass spezielle und wesentliche Anforderungen nicht erkannt und erfasst werden. Feine Unterschiede zwischen Arbeiten kommen nicht zur Geltung.</li><li>- Der Bewerter hat einen großen Bewertungsspielraum, an seine Ausbildung und sein Vorstellungsvermögen werden hohe Anforderungen gestellt.</li><li>- Einzelne Stellen werden ungerecht beurteilt, viele Arbeitnehmer haben das Gefühl, dass ihre Arbeit nicht umfassend gewürdigt und bewertet wird. Die Gewerkschaften werden schwerer zu gewinnen sein.</li></ul> | <ul style="list-style-type: none"><li>- Begriffsinhaltliche Überschneidungen und Wechselbeziehungen zwischen einzelnen Merkmalen, dadurch Doppelbewertung und Doppelbezahlung, Genauigkeit leidet, Treffsicherheit nimmt ab.</li><li>- Das Verfahren wird komplizierter, das System unübersichtlicher, dadurch ist die Bewertung für den Bewerter und die Betriebsleitung schwerer zu handhaben, dem Arbeitnehmer wird sie unverständlich.</li><li>- Arbeits-, Zeit- und Geldaufwand steigen kontinuierlich an.</li></ul> |

S. 574 Abb. 133



Erweiterung des Genfer Schemas

| Hauptmerkmale                                | Untermerkmale<br>(Anforderungsarten)                                                                                                                                                                                              |
|----------------------------------------------|-----------------------------------------------------------------------------------------------------------------------------------------------------------------------------------------------------------------------------------|
| 1. Geistige Anforderungen                    | a) Fachkenntnisse<br>b) Nachdenken (geistige Beanspruchung)                                                                                                                                                                       |
| 2. Körperliche Anforderungen                 | a) Geschicklichkeit<br>b) Muskelbelastung<br>c) Aufmerksamkeit (Belastung der Sinne und Nerven)                                                                                                                                   |
| 3. Verantwortung für                         | a) Betriebsmittel und Produkte<br>b) Sicherheit und Gesundheit anderer<br>c) Arbeitsablauf                                                                                                                                        |
| 4. Arbeitsbedingungen<br>(Belastungen durch) | a) Temperatur<br>b) Nässe (Wasser, Feuchtigkeit, Säure)<br>c) Schmutz (Öl, Fett, Staub)<br>d) Gas, Dämpfe<br>e) Lärm, Erschütterung<br>f) Blendung, Lichtmangel<br>g) Erkältungsgefahr, Arbeiten im Freien<br>h) Unfallgefährdung |

S. 575 Abb. 134



Erweitertes Genfer Schema nach Bloch

|                      | Kenntnisse<br>Fähigkeiten                                                                                                                                                                                                | Belastungen<br>Beanspruchungen                                                                                                                                                                               |
|----------------------|--------------------------------------------------------------------------------------------------------------------------------------------------------------------------------------------------------------------------|--------------------------------------------------------------------------------------------------------------------------------------------------------------------------------------------------------------|
| Grundlagen           | <ul style="list-style-type: none"><li>• Schulkenntnisse</li><li>• Systematische Ausbildung und Lehre</li><li>• Erfahrung</li><li>• Zusatzkenntnisse</li></ul>                                                            | <ul style="list-style-type: none"><li>• Geistige Anstrengung</li></ul>                                                                                                                                       |
| Geistige Merkmale    | <ul style="list-style-type: none"><li>• Ausdrucksfähigkeit</li><li>• Logische Denkfähigkeit</li><li>• Schöpferische Denkfähigkeit</li><li>• Geistige Regsamkeit</li></ul>                                                |                                                                                                                                                                                                              |
| Charaktermerkmale    | <ul style="list-style-type: none"><li>• Autorität</li><li>• Sinn für Zusammenarbeit</li><li>• Takt</li><li>• Initiative</li><li>• Entschlusskraft</li><li>• Verantwortungsbewusstsein</li><li>• Aufmerksamkeit</li></ul> | <ul style="list-style-type: none"><li>• Belastung aus Verkehr mit Personen</li><li>• Verantwortung für Folgen von Anordnungen</li><li>• Verantwortungen</li><li>• Beanspruchung der Aufmerksamkeit</li></ul> |
| Körperliche Merkmale | <ul style="list-style-type: none"><li>• Geschicklichkeit</li><li>• Anforderung an Sinnesorgane</li><li>• Körperliche Konstitution</li></ul>                                                                              | <ul style="list-style-type: none"><li>• Anstrengung der Sinnesorgane</li><li>• Körperliche Anstrengung</li></ul>                                                                                             |
| Umgebungsmerkmale    |                                                                                                                                                                                                                          | <ul style="list-style-type: none"><li>• Gesundheitsgefährdung</li><li>• Umweltbedingungen</li></ul>                                                                                                          |

S. 576 Abb. 135

(in Anlehnung an: Bloch, W.: Arbeitsbewertung. in: Enzyklopädie der Betriebswirtschaftslehre, Bd. V: Handwörterbuch des Personalwesens, Hrsg. von Gaugler, E., Stuttgart 1975, S. 147)

## Anwendungsformen und Arten der Gewichtung

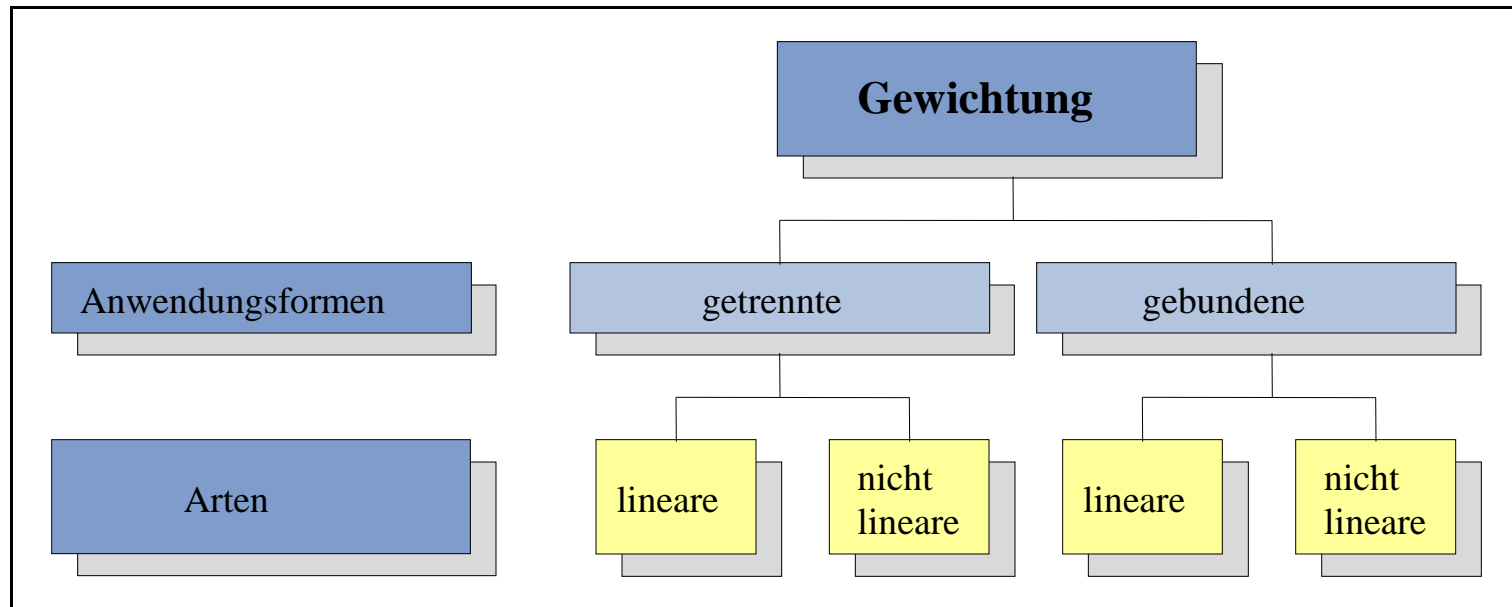

S. 576 Abb. 136

Jung, Hans: Personalwirtschaft, 9. Aufl., München 2010.

© Oldenbourg Wissenschaftsverlag



## Rangreihenverfahren mit getrennter Gewichtung

### 1. Beschreiben der Arbeit (Formular)

Beispiel: Reinigen (Putzen) von  
Gussstücken

### 2. Rangieren

Jede Arbeit wird in die Rangreihen der  
verschiedenen Anforderungsarten ent-  
sprechend ihrer Anforderungshöhe  
eingeordnet und erhält somit einen  
Rangplatz.

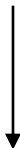

|                    | Rangplatz<br>in der Rangreihe<br>(Rangreihe 0 - 100) |
|--------------------|------------------------------------------------------|
| Arbeitskenntnisse  | 20                                                   |
| Geschicklichkeit   | 35                                                   |
| Verantwortung      | 20                                                   |
| geistige Belastung | 20                                                   |
| Muskelbelastung    | 70                                                   |
| Umgebungseinflüsse | 70                                                   |

(Fortsetzung)

3. Gewichten

Die Rangplatznummern der einzelnen Anforderungsarten werden mit den Gewichtungsfaktoren multipliziert und ergeben die Arbeitswerte.

|                    | Rangplatz |   | Gewichtungsfaktor |   | Anforderungswerte |
|--------------------|-----------|---|-------------------|---|-------------------|
| Arbeitskenntnisse  | 20        | x | 1                 | = | 20                |
| Geschicklichkeit   | 35        | x | 0,7               | = | 25                |
| Verantwortung      | 20        | x | 0,5               | = | 10                |
| geistige Belastung | 20        | x | 0,5               | = | 10                |
| Muskelbelastung    | 70        | x | 0,9               | = | 63                |
| Umgebungseinflüsse | 70        | x | 0,2               | = | 14                |
| Wertzahlsumme      |           |   |                   |   | 142               |

4. Tarifieren

Die Summe der Anforderungswerte ist die Wertzahlsumme und entspricht den tariflich vereinbarten Lohnhöhen.

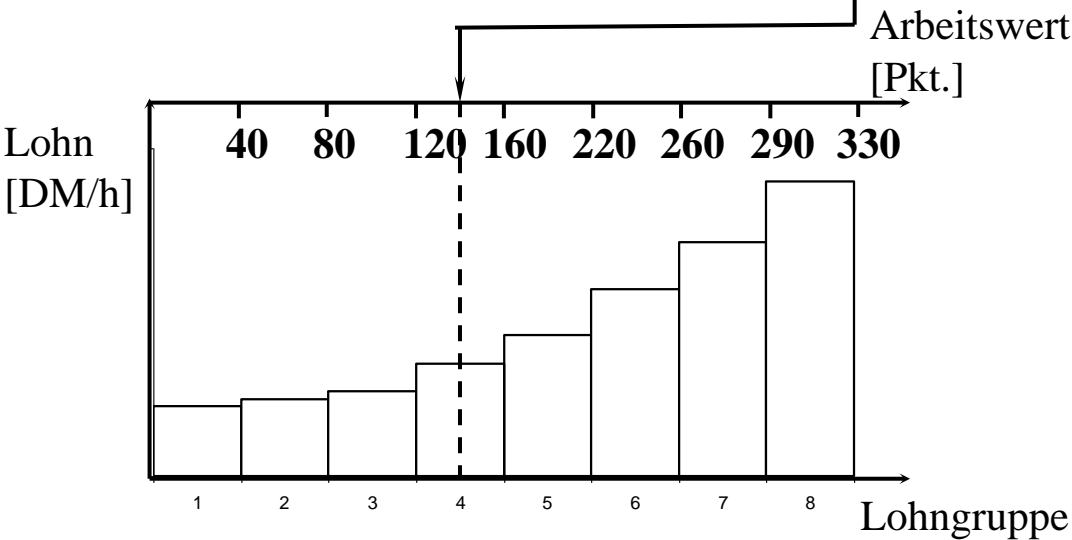



## Rangreihenverfahren mit gebundener Gewichtung

- Gebundene Gewichtung heißt, dass die Rangplatznummer unmittelbar die Anforderungswerte häufig auch (Punkte genannt) wiedergegeben.
- Die Gewichtung ist dabei direkt im Bewertungssystem integriert, was zu unterschiedlich langen Rangreihen der einzelnen Anforderungsarten führt.



Stufenwertverfahren

Beim Stufenwertverfahren werden für jede Anforderungsart einer Arbeitsverrichtung oder eines Arbeitsplatzes **Anforderungsstufen** festgelegt, denen Wertzahlen bzw. Punkte zugeordnet werden.

| Stufe | Verbale Beschreibung<br>der Arbeitsschwierigkeit | Wertzahlen          |                        |                         |
|-------|--------------------------------------------------|---------------------|------------------------|-------------------------|
|       |                                                  | lineare<br>Steigung | Degressive<br>Steigung | Progressive<br>Steigung |
| 1     | äußerst gering                                   | 0                   | 0                      | 0                       |
| 2     | gering                                           | 2                   | 5                      | 1                       |
| 3     | mittel                                           | 4                   | 9                      | 3                       |
| 4     | groß                                             | 6                   | 12                     | 6                       |
| 5     | sehr groß                                        | 8                   | 14                     | 10                      |
| 6     | extrem groß                                      | 10                  | 15                     | 15                      |

Richtbeispiele können die Zuordnung der Anforderungshöhe des Arbeitsplatzes erleichtern. Die Summe der Wertzahlen aller Anforderungsarten ermöglicht die Einordnung in eine Arbeitswertgruppe.

S. 578 Abb. 137





Gewichtung des Anforderungsarten

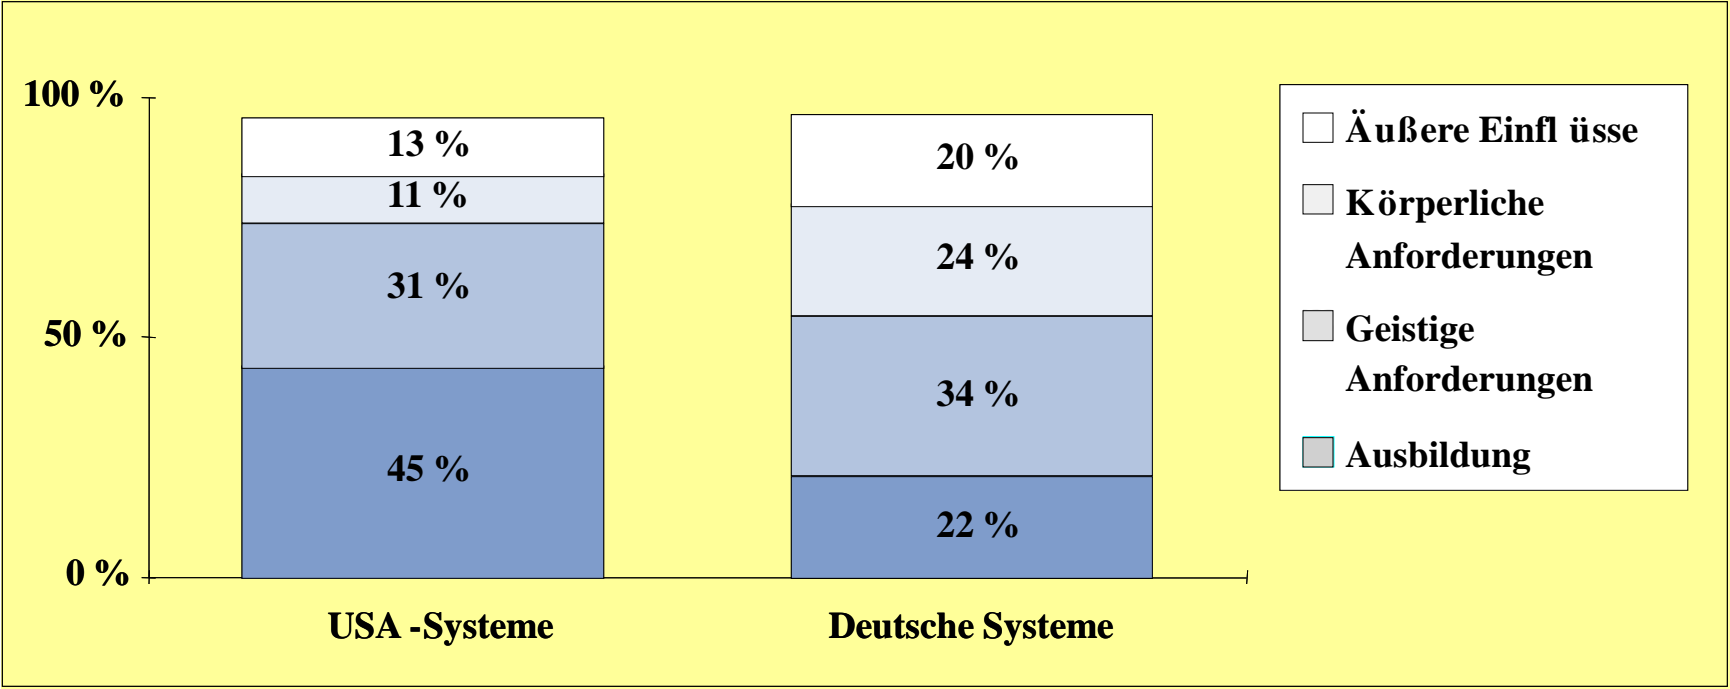

S. 579 Abb. 138

Quelle: Lücke, W.: Arbeitsleistung, Arbeitsbewertung, Arbeitsentlohnung. in: Industriebetriebs-lehre, Hrsg. von Jacob, H., 4. Aufl., Wiesbaden 1990, S. 260

Jung, Hans: Personalwirtschaft, 9. Aufl., München 2010.

© Oldenbourg Wissenschaftsverlag



| Arbeitswertgruppen und Monatsgrundlöhne in der Metallindustrie<br>(Tarifgebiet Nordwürttemberg/Nordbaden, Stand 2009)                                                      |            |            |               |                |                |              |              |              |              |              |
|----------------------------------------------------------------------------------------------------------------------------------------------------------------------------|------------|------------|---------------|----------------|----------------|--------------|--------------|--------------|--------------|--------------|
| 1                                                                                                                                                                          | 2          | 3          | 4             | 5              | 6              | 7            | 8            | 9            | 10           | 11           |
| 0-3,5                                                                                                                                                                      | über 3,5-6 | über 6-8,5 | über 8,5-11,5 | über 11,5-14,5 | über 14,5-17,5 | über 17,5-21 | über 21-24,5 | über 24,5-28 | Über 28-31,5 | über 31,5-35 |
| 1.796                                                                                                                                                                      | 1.796      | 1.839      | 1.882         | 1.965          | 2.070          | 2.195        | 2.318        | 2.441        | 2.567        | 2.689        |
| Arbeitswertgruppe 12: Für jeden weiteren angefangenen Arbeitswert über 35 wird dem Grundlohn ein Betrag von 1,7 % des Geldbetrages der Arbeitswertgruppe 6 hinzugerechnet. |            |            |               |                |                |              |              |              |              |              |

S. 580 Abb. 139  
Quelle: IG Metall: Daten, Fakten, Informationen 2009, S. 52



Bestimmung der Lohnhöhe aus Arbeitswerten

|                                                                                   |           |          |
|-----------------------------------------------------------------------------------|-----------|----------|
| Tariflohn der untersten Lohngruppe<br>(Grundlohn für Arbeitswerte 0-10)           | EUR/Monat | 1.527,65 |
| Steigerungsbetrag für Arbeitswerte<br>über 10 -13                                 | EUR/Monat | 10,49    |
| Steigerungsbetrag I für Arbeitswerte<br>über 13 -14                               | EUR/Monat | 24,33    |
| Steigerungsbetrag II für Arbeitswerte<br>über 14 -29 (1,1 x Steigerungsbetrag I)  | EUR/Monat | 26,76    |
| Steigerungsbetrag III für Arbeitswerte<br>über 29 -45 (1,3 x Steigerungsbetrag I) | EUR/Monat | 31,63    |
| <hr/>                                                                             |           |          |
| Berechnungsbeispiel für den Arbeitswert 22:                                       |           |          |
| Tariflohn der untersten Lohngruppe                                                |           | 1.527,65 |
| + 4 x Steigerungsbetrag AW 10 - 13                                                |           | 41,97    |
| + 1 x Steigerungsbetrag I                                                         |           | 24,33    |
| + 8 x Steigerungsbetrag II                                                        |           | 214,13   |
|                                                                                   | EUR/Monat | 1.808,08 |

S. 580 Abb. 140

| <b>Monatsgrundlöhne in der Metallindustrie<br/>(Tarifgebiet Nordrhein-Westfalen, Stand 2007)</b>                      |            |             |            |             |            |
|-----------------------------------------------------------------------------------------------------------------------|------------|-------------|------------|-------------|------------|
| Arbeitswert                                                                                                           | Monatslohn | Arbeitswert | Monatslohn | Arbeitswert | Monatslohn |
| 0-10                                                                                                                  | 1.695      | über 21     | 1.977      | über 33     | 2.355      |
| über 10                                                                                                               | 1.707      | über 22     | 2.007      | über 34     | 2.390      |
| über 11                                                                                                               | 1.719      | über 23     | 2.036      | über 35     | 2.425      |
| über 12                                                                                                               | 1.730      | über 24     | 2.066      | über 36     | 2.460      |
| über 13                                                                                                               | 1.742      | über 25     | 2.096      | über 37     | 2.496      |
| über 14                                                                                                               | 1.769      | über 26     | 2.125      | über 38     | 2.531      |
| über 15                                                                                                               | 1.799      | über 27     | 2.155      | über 39     | 2.566      |
| über 16                                                                                                               | 1.829      | über 28     | 2.185      | über 40     | 2.601      |
| über 17                                                                                                               | 1.858      | über 29     | 2.215      | über 41     | 2.636      |
| über 18                                                                                                               | 1.888      | über 30     | 2.250      | über 42     | 2.671      |
| über 19                                                                                                               | 1.917      | über 31     | 2.285      | über 43     | 2.706      |
| über 20                                                                                                               | 1.947      | über 32     | 2.320      | über 44     | 2.741      |
| Über 45 Arbeitswerte wird für jeden angefangenen Arbeitswert mit dem Steigerungsbetrag 32,7484 EUR<br>weitergerechnet |            |             |            |             |            |

S. 581 Abb. 141

Quelle: IG Metall: Daten, Fakten, Informationen 2009, S. 53

Jung, Hans: Personalwirtschaft, 9. Aufl., München 2010.

© Oldenbourg Wissenschaftsverlag



Analytische Arbeitsbewertung für AT-Angestellte

| Anforderungsart      |                                                              | Wertzahl                                          |                                          |                                          |                                          |                      |
|----------------------|--------------------------------------------------------------|---------------------------------------------------|------------------------------------------|------------------------------------------|------------------------------------------|----------------------|
|                      |                                                              | 1                                                 | 2                                        | 3                                        | 4                                        | 5                    |
| Belastung            | A Nachdenken und Disponieren                                 | gering                                            | normal                                   | hoch                                     | sehr hoch                                | außerge-<br>wöhnlich |
|                      | B Kontakte                                                   | gering                                            | normal                                   | hoch                                     | sehr hoch                                | außerge-<br>wöhnlich |
| Verant-<br>wortung   | C Befugnisse/<br>Vollmachten                                 | gering                                            | normal                                   | hoch                                     | sehr hoch                                | außerge-<br>wöhnlich |
|                      | D Entschei-dungs-<br>reichweite                              | nur auf ei-<br>genen De-<br>legations-<br>bereich | auf ein<br>Anschluss-<br>gebiet          | auf Teile<br>des Unter-<br>nehmens       | auf das ganze<br>Un-ternehmen            |                      |
| Personal-<br>führung | E direkt unter-stellte<br>Mitar-beiter (TG =<br>Tarifgruppe) | ab 3 und mehr<br>Mitarbeiter<br>bis TG 8          | ab 6 und mehr<br>Mitarbeiter<br>bis TG 8 | ab 3 und mehr<br>Mitarbeiter<br>ab TG 12 | ab 6 und mehr<br>Mitarbeiter<br>ab TG 12 |                      |
|                      | F gesamte Mit-<br>arbeiterzahl                               | bis 10                                            | 11-19                                    | 20-49                                    | ab 50                                    |                      |

S. 583 Abb. 142  
(in Anlehnung an: Zander, E.: Lohn- und Gehaltsfestsetzung in Klein- und Mittelbetrieben, 11. Auflage, Freiburg i. Br., S. 101)



Beispiel für eine außertarifliche Arbeitsbewertung

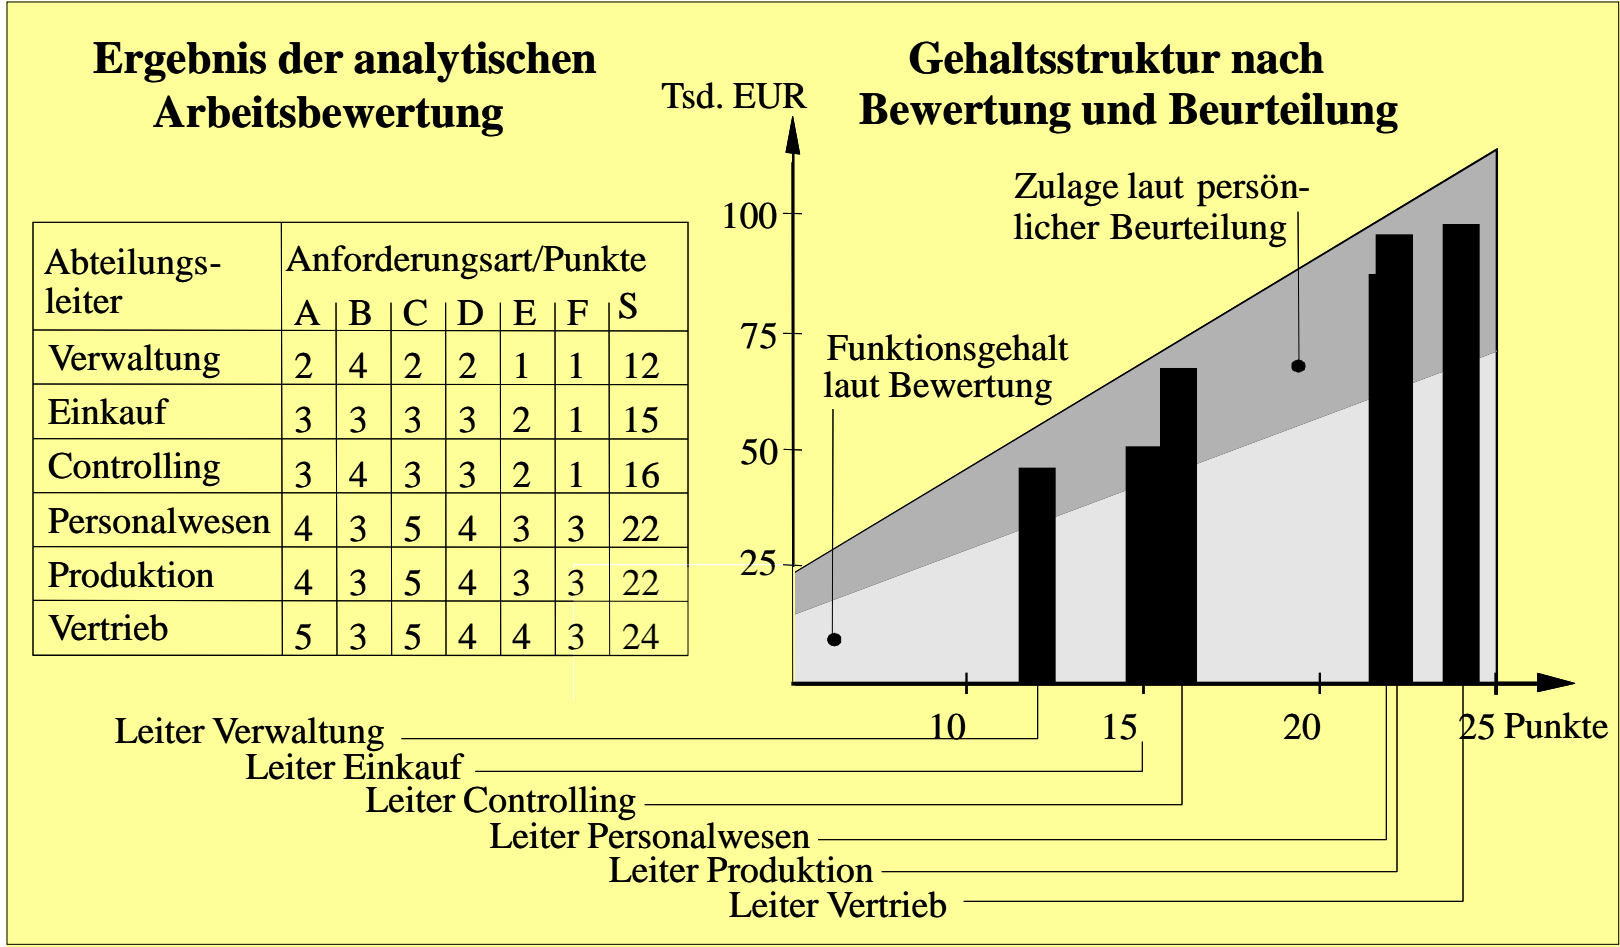

S. 584 Abb. 143

(in Anlehnung an: Zander, E.: Lohn- und Gehaltsfestsetzung in Klein- und Mittelbetrieben, 11. Auflage, Freiburg i. Br., S. 98 ff)



## Lohnformen

Es können drei Lohnformen unterschieden werden, die in verschiedenen Varianten praktiziert werden:

- (1) **der Zeitlohn,**
- (2) **der Akkordlohn und**
- (3) **der Prämienlohn.**

Der **Akkordlohn** und der **Prämienlohn** werden häufig unter der Bezeichnung Leistungslohnsystem oder Lohnanreizsystem zusammengefasst, da diese Lohnformen eine direkte Beziehung zwischen Lohnhöhe und Leistungshöhe aufweisen. In der Regel ist die Leistung messbar und in Beziehung zu einer Normalleistung zu setzen.

Bei der Systematisierung der Lohnformen ist es zweckmäßig, von den **Bemessungsgrundlagen** auszugehen. Bemessungsgrundlagen sind Leistungszeit und Leistungsmenge. Je nachdem, ob sich die Lohnform ausschließlich auf eine Bemessungsgrundlage oder auf mehrere stützt, kann zwischen reinen und zusammengesetzten Lohnformen unterschieden werden.

## Zeitlohn

Zeitlohn ist ein Entlohnungsgrundsatz, bei dem sich die Vergütung eines Arbeitnehmers nach der Zeit richtet, die er seinem Arbeitgeber zur Verfügung steht.

Leistungsvorgaben dürfen nicht vorhanden sein, außer wenn sie durch das Betriebsmittel bedingt sind und die Arbeitskraft keinen Einfluss auf die Intensität nehmen kann.

Beim Zeitlohn bestehen zwei Grundbeziehungen:

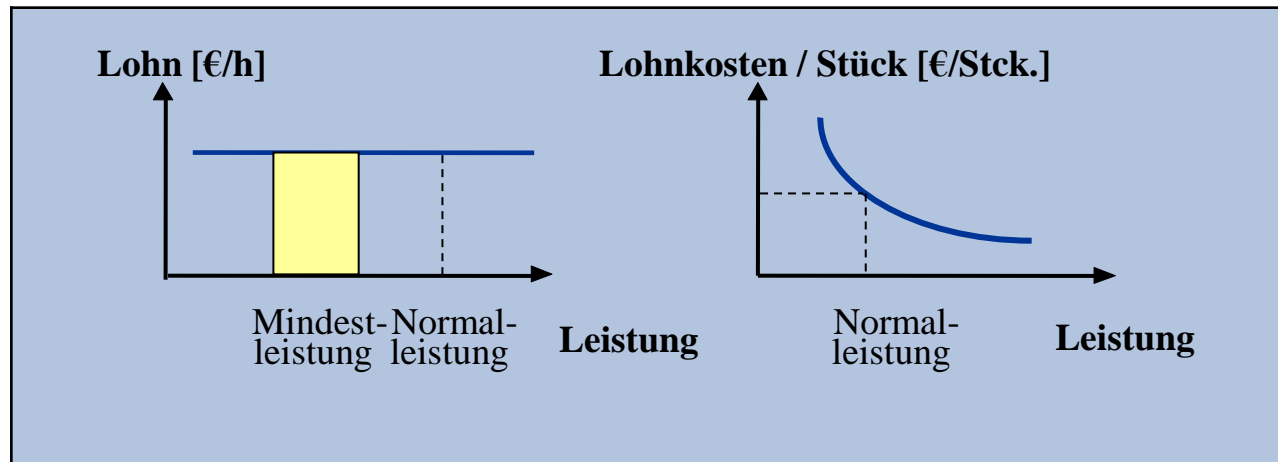

S. 586 Abb. 144





## Die Anwendung von Zeitlohn ist sinnvoll, wenn:

- ein Anreiz aus wirtschaftlichen Gründen nicht zweckmäßig ist (Tätigkeiten, die Sorgfalt, Gewissenhaftigkeit und Präzision erfordern);
- die Leistung nicht messbar bzw. die Messung mit hohen Kosten verbunden ist;
- ein überhöhtes Arbeitstempo Gesundheitsschäden hervorrufen würde bzw. Unfälle oder Schäden an den Betriebsmitteln eintreten könnten;
- nur wenige Arbeitsverrichtungen anfallen und dazwischen längere Wartezeiten liegen;
- aus arbeitsrechtlicher oder psychologischer Sicht eine Leistungslohnform nicht eingeführt werden kann;
- wenn nicht genügend qualifiziertes Personal für die Arbeitsvorbereitung und die Zeitwirtschaft zur Verfügung steht.



Bemessungskriterien für die Leistungszulage

| Mögliche Kriterien als Bemessungsgrundlage                                                                                                                                               |                                                                                                                                                                                                   |                                                                                                                                                                                    |
|------------------------------------------------------------------------------------------------------------------------------------------------------------------------------------------|---------------------------------------------------------------------------------------------------------------------------------------------------------------------------------------------------|------------------------------------------------------------------------------------------------------------------------------------------------------------------------------------|
| <ul style="list-style-type: none"><li>· Arbeitsgüte</li><li>· Arbeitszielerreichung</li><li>· Auftreten</li><li>· Führungsverhalten</li><li>· Pünktlichkeit</li><li>· Sorgfalt</li></ul> | <ul style="list-style-type: none"><li>· Arbeitsmenge</li><li>· Betriebszugehörigkeit</li><li>· Belastbarkeit</li><li>· Kostenverantwortung</li><li>· Organisation</li><li>· Termintreue</li></ul> | <ul style="list-style-type: none"><li>· Arbeitssicherheit</li><li>· Fachkenntnisse</li><li>· Erfahrungen</li><li>· Ordnung</li><li>· Planung</li><li>· Flexibilität usw.</li></ul> |

S. 587 Abb. 145

Jung, Hans: Personalwirtschaft, 9. Aufl., München 2010.

© Oldenbourg Wissenschaftsverlag

## Akkordlohn

Beim Akkordlohn wird der Lohn anforderungs- und leistungsabhängig differenziert. Als Leistungskennzahl wird die vom Menschen beeinflussbare Mengenleistung bzw. der daraus abgeleitete Zeitgrad benutzt.

Der Stundenlohn verhält sich beim Akkordlohn proportional zur erzielten Mengenleistung, während die Lohnkosten pro Stück konstant bleiben.

Den Arbeitnehmern im Akkordlohn wird ein tarifvertraglich abgesicherter Mindestlohn garantiert, welcher der Lohnhöhe bei Normalleistung entspricht und welcher vom Unternehmen mindestens zu zahlen ist.

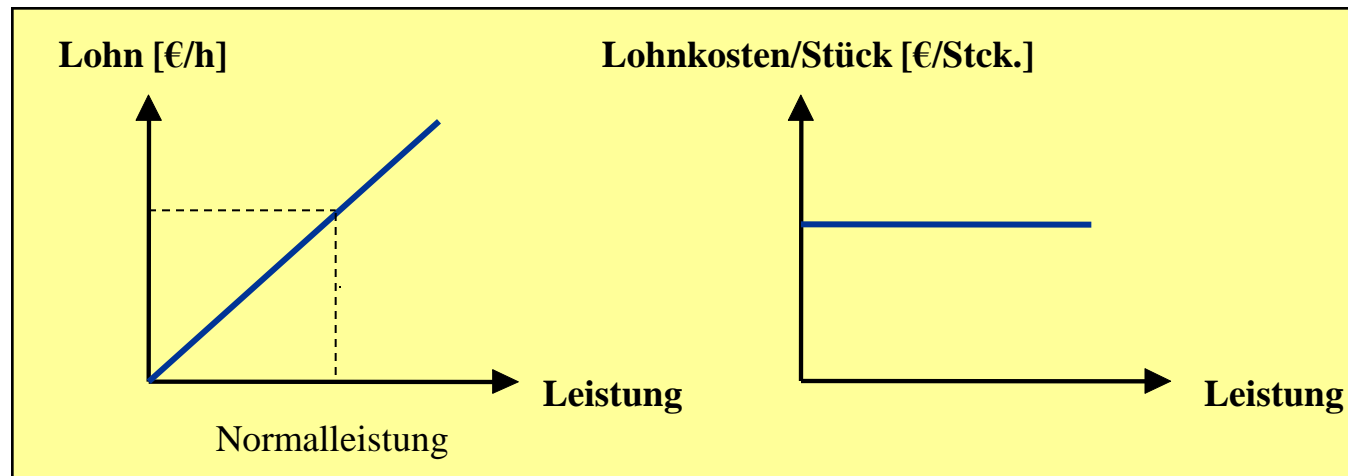

S. 588 Abb. 146



| Beispiel für die Berechnung von Zeit - und Geldakkord                                  |                                           |  |            |
|----------------------------------------------------------------------------------------|-------------------------------------------|--|------------|
| 1. Vorgaben:                                                                           | Tariflicher Mindestlohn                   |  | 10,00 EUR  |
|                                                                                        | Akkordzuschlag                            |  | 20 %       |
|                                                                                        | Vorgabezeit je Einheit                    |  | 10 Minuten |
|                                                                                        | Wirklich pro Stunde bearbeitete Stückzahl |  | 7 Stück    |
| 2. Rechnung:                                                                           |                                           |  |            |
| Akkordrichtsatz (Er entspricht dem Lohn bei Normal - oder darunter liegender Leistung) |                                           |  |            |
| = 10,00 EUR + 20 % = 12,00 EUR                                                         |                                           |  |            |
| Geldfaktor je Zeiteinheit (Minutenfaktor)                                              |                                           |  |            |
| = Akkordrichtsatz : 60 = 12,00 EUR : 60 = 0,20 EUR/Minute                              |                                           |  |            |
| Zeitakkord:                                                                            |                                           |  |            |
| Stundenverdienst = 7 · 10 Min. · 0,20 EUR/Min. = 14,00 EUR                             |                                           |  |            |
| Geldakkord (Vorgabe: Stücklohn = 10 Min. · 0,20 EUR/Min. = 2,00 EUR):                  |                                           |  |            |
| Stundenverdienst = 7 · 2,00 EUR = 14,00 EUR                                            |                                           |  |            |

S. 590 Abb. 147



| Akkordlohn  |                                                                                                                                                                                                                                                                        |                                                                                                                                                                                                                                                                                               |
|-------------|------------------------------------------------------------------------------------------------------------------------------------------------------------------------------------------------------------------------------------------------------------------------|-----------------------------------------------------------------------------------------------------------------------------------------------------------------------------------------------------------------------------------------------------------------------------------------------|
|             | Vorteile                                                                                                                                                                                                                                                               | Nachteile                                                                                                                                                                                                                                                                                     |
| Mitarbeiter | <ul style="list-style-type: none"><li>- Leistungsgerechte und leistungsfördernde Entlohnung mit unmittelbarem Leistungs-Verdienst-Verhältnis</li></ul>                                                                                                                 | <ul style="list-style-type: none"><li>- Gefahr der Überschätzung der eigenen Leistungsfähigkeit</li><li>- Akkordrisiko bringt Lohnschwankungen (Folge: Es werden Sicherheitsreserven angelegt)</li></ul>                                                                                      |
| Unternehmen | <ul style="list-style-type: none"><li>- Vorplanung der Arbeitsabläufe, des Arbeitskräfte- und Betriebsmittelbedarfs, der Termine, Lohn- und Gemeinkosten</li><li>- Gut funktionierende Fertigungssteuerung</li><li>- Aufdeckung betrieblicher Schwachstellen</li></ul> | <ul style="list-style-type: none"><li>- Aufwand für Leistungspflege</li><li>- Anpassen der Vorgabezeiten und Arbeitswerte an den technischen Fortschritt</li><li>- Leistungszurückhaltung bei nicht mehr zutreffenden Akkorden</li><li>- Qualitätseinbußen wegen hohem Arbeitstempo</li></ul> |

## Grundelemente des Prämienlohns

Der Prämienlohn ist eine anforderungs- und leistungsabhängige Lohnform, da er neben einem vereinbarten Grundlohn planmäßig und regelmäßig eine zusätzliche Prämie für eine bestimmte Mehrleistung des Arbeitnehmers gewährt.

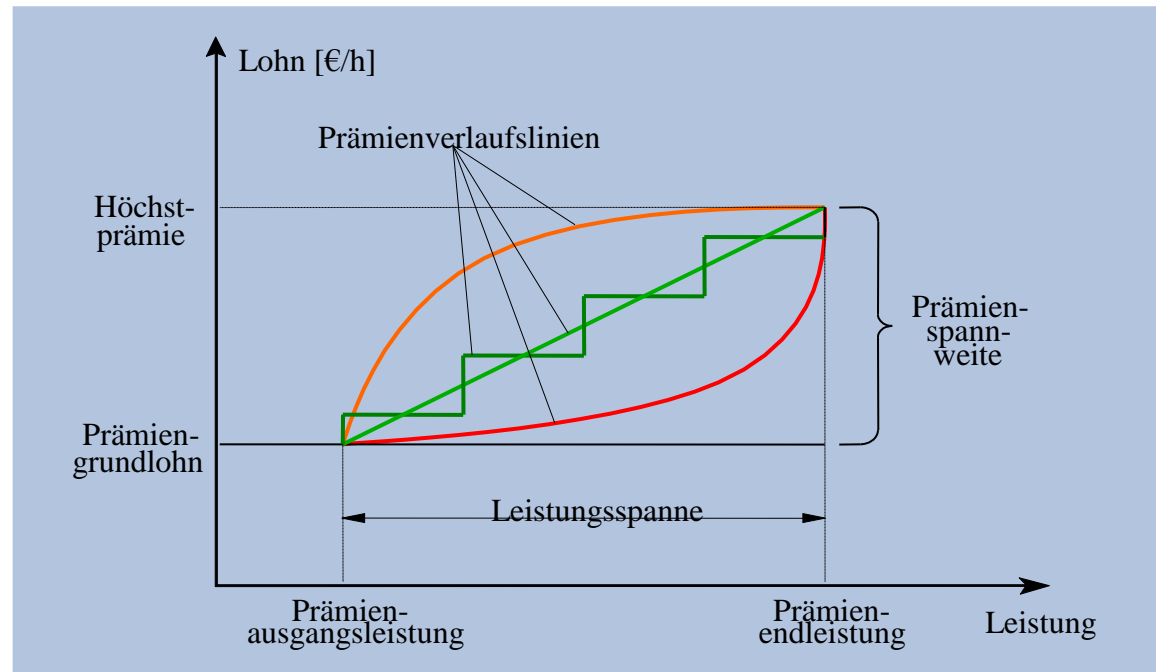

S. 593 Abb. 149

Jung, Hans: Personalwirtschaft, 9. Aufl., München 2010.

© Oldenbourg Wissenschaftsverlag



## Prämienarten

1. Mengenleistungsprämien
2. Qualitätsprämien
3. Ersparnisprämien
4. Nutzungsgradprämien
5. Kombinierte Prämien

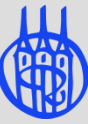

## Pensumlohn (measured day work, fair days work)

- Der Pensumlohn, besteht ähnlich dem Prämienlohn aus zwei Bestandteilen, dem **Grundlohn** und dem **periodenfixen Pensumentgelt**.
- Das periodenfixe Pensumentgelt wird in der Praxis für ein festgelegtes Arbeitsvolumen gewährt, wodurch sich die Beziehung zum Akkordlohn ergibt.
- Im Gegensatz zum Akkord- und Prämienlohn, bei denen die tatsächliche Leistung nach Abschluss der Abrechnungsperiode festgestellt und entlohnt wird, nimmt der Pensumlohn Bezug auf die **erwartete Leistung**.
- Er wird entsprechend dem vereinbarten Arbeitsergebnis für die künftige Abrechnungsperiode festgelegt. Ein Über- oder Unterschreiten der Soll-Leistung wirkt sich nicht direkt, sondern allenfalls in einer zukünftigen Periode auf den Lohn aus. Der Pensumlohn ist somit zwar von dem erbrachten Arbeitsergebnis abhängig, hat gleichzeitig jedoch "Festlohncharakter"





| Pensumlohn                                                                                                                                                                                                                                                                                                                                                                                                                                                                                                                                                                                                                                                                                                                                                                                   |                                                                                                                                                                                                                                                                                                                                                                                                                                                                                                                                                                                                         |
|----------------------------------------------------------------------------------------------------------------------------------------------------------------------------------------------------------------------------------------------------------------------------------------------------------------------------------------------------------------------------------------------------------------------------------------------------------------------------------------------------------------------------------------------------------------------------------------------------------------------------------------------------------------------------------------------------------------------------------------------------------------------------------------------|---------------------------------------------------------------------------------------------------------------------------------------------------------------------------------------------------------------------------------------------------------------------------------------------------------------------------------------------------------------------------------------------------------------------------------------------------------------------------------------------------------------------------------------------------------------------------------------------------------|
| Vorteile                                                                                                                                                                                                                                                                                                                                                                                                                                                                                                                                                                                                                                                                                                                                                                                     | Nachteile                                                                                                                                                                                                                                                                                                                                                                                                                                                                                                                                                                                               |
| <ul style="list-style-type: none"><li>- Die Mitarbeiter erhalten einen garantierten Lohn. Dadurch entfällt der Leistungsdruck.</li><li>- Weil die Mitarbeiter einen konstanten Lohn erhalten, kommt es seltener als bei den anderen Lohnanreizsystemen zu Unstimmigkeiten über die Vorgabezeiten. Die Zeiten können daher leichter an neue Arbeitsmethoden angepasst werden.</li><li>- Die Lohnabrechnung ist einfacher als bei Akkord- und Prämienlöhnen, weil das Auswerten der Lohnscheine entfällt.</li><li>- Für eine Leistungszurückhaltung aus kollegialen Gründen besteht kein Grund mehr.</li><li>- Die Mitarbeiter werden nicht zu steter Ergebnissteigerung motiviert, wenn dies unzumutbar ist oder das Erfüllen fester Pensen den Geschäftsablauf besser unterstützt.</li></ul> | <ul style="list-style-type: none"><li>- Ein direkter Leistungsanreiz fehlt.</li><li>- Deswegen hängt die Produktivität einer Gruppe hauptsächlich von der Führungskraft ab.</li><li>- Ein EDV-gestütztes Fertigungssteuerungssystem muss installiert werden.</li><li>- Die Betreuung und Motivation der Mitarbeiter nimmt den Vorgesetzten stärker als bei anderen Leistungslohnsystemen in Anspruch. Dadurch wird die Zahl der unterstellten Mitarbeiter eingeschränkt.</li><li>- Die Vorgesetzten müssen intensiv geschult werden, damit sie den hohen Anforderungen gerecht werden können.</li></ul> |

S. 596 Abb. 150



## Das System ERA

### Allgemeines

- Lohn- und Gehaltsgruppen werden durch Entgeltgruppen abgelöst
- Angestellten- und Arbeitertätigkeiten sollen nach gleichem Maßstab bewertet und vergütet werden
- Zeitpunkt und Art der Durchführung in den Bundesländern ist verschieden

### Oberstes Ziel

- Höheres Maß an Entgeltgerechtigkeit

### Grundsatz

- Mitarbeiter müssen neu eingruppiert werden, um vorhandene Fehleingruppierungen oder Irrtümer zu beseitigen



## Das ERA – Bewertungsverfahren im Überblick

- Arbeitsaufgabe zu Grunde gelegt, um anforderungsgerechtes Grundentgelt zu finden
- Summarische und analytische Arbeitsbewertung
- Lohn- und Gehaltsgruppen durch Entgeltgruppen ersetzen
- Entgeltstufen
- Tarif- und Niveaubeispiele
- Belastungen



Die Tarifwerke des Regelungskomplexes ERA

|                                                                                                                                                                                                                                                                                   |                                                                                                                                                                                                                 |
|-----------------------------------------------------------------------------------------------------------------------------------------------------------------------------------------------------------------------------------------------------------------------------------|-----------------------------------------------------------------------------------------------------------------------------------------------------------------------------------------------------------------|
| <p>Entgeltrahmen TV,<br/>insbesondere:</p> <ul style="list-style-type: none"><li>•Eingruppierungsbestimmungen</li><li>•Bewertungsverfahren</li><li>•Entgeltformen</li><li>•Belastungen, Erschwernisse</li></ul>                                                                   | <p>EntgeltTV,<br/>insbesondere:</p> <ul style="list-style-type: none"><li>•Entgelttabelle</li><li>•Ausbildungsvergütungen</li></ul>                                                                             |
| <p>EinführungsTV/ÜberleitungsTV<br/>insbesondere:</p> <ul style="list-style-type: none"><li>•Zeitschiene</li><li>•Eingruppierungsverfahren bei der Umstellung auf ERA</li><li>•Besitzstandsicherung</li><li>•Sicherung der betrieblichen Kosteneingruppierungsverfahren</li></ul> | <p>TV ERA-Anpassungsfonds<br/>insbesondere:</p> <ul style="list-style-type: none"><li>•Aufbau und Verwendung des Fonds(ERA-Strukturkomponente)</li><li>•Faktoren für die Bemessung der Fondszuführung</li></ul> |

S. 597 Abb. 151



## Das ERA-Bewertungsverfahren

|                                                                                                                                                                                                                                                                                          |
|------------------------------------------------------------------------------------------------------------------------------------------------------------------------------------------------------------------------------------------------------------------------------------------|
| <b>Entgeltgruppe 1:</b><br>Tätigkeiten nach Unterweisung, in der Regel drei Tage, Ablauf und Ausführung festgelegt                                                                                                                                                                       |
| <b>Entgeltgruppe 2:</b><br>Tätigkeiten nach Unterweisung, bis zu vier Wochen, Ablauf und Ausführung weitgehend festgelegt                                                                                                                                                                |
| <b>Entgeltgruppe 3:</b><br>Tätigkeiten nach fachspezifischem systematischem Anlernen, in der Regel mehr als vier Wochen, Ablauf und Ausführung im Wesentlichen festgelegt                                                                                                                |
| <b>Entgeltgruppe 4:</b><br>Tätigkeiten nach mindestens zweijähriger fachspezifischer Berufsausbildung, Ablauf und Ausführung in Teilen festgelegt                                                                                                                                        |
| <b>Entgeltgruppe 5:</b><br>Aufgaben nach mindestens dreijähriger fachspezifischer Berufsausbildung, Handlungsspielraum im Rahmen allgemeiner Anweisungen innerhalb der Aufgaben                                                                                                          |
| <b>Entgeltgruppe 6:</b><br>Aufgaben nach mindestens dreijähriger fachspezifischer Berufsausbildung und mehrjähriger fachspezifischer Berufserfahrung oder fachspezifischer Weiterbildung, Handlungsspielraum im Rahmen allgemeiner Anweisungen innerhalb der verschiedenartigen Aufgaben |
| <b>Entgeltgruppe 7:</b><br>Aufgaben nach mindestens dreijähriger fachspezifischer Berufsausbildung und langjähriger fachspezifischer Berufserfahrung, erweiterter Handlungsspielraum im Rahmen allgemeiner Anweisungen                                                                   |

S. 599 Abb. 152A

Quelle: IG Metall: Daten, Fakten, Informationen 2009, S. 23

Jung, Hans: Personalwirtschaft, 9. Aufl., München 2010.

© Oldenbourg Wissenschaftsverlag

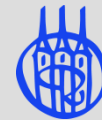

(Fortsetzung)

|                                                                                                                                                                                                                                                                     |
|---------------------------------------------------------------------------------------------------------------------------------------------------------------------------------------------------------------------------------------------------------------------|
| <b>Entgeltgruppe 8:</b><br><br>Fachübergreifende Aufgaben nach mindestens dreijähriger fachspezifischer Berufsausbildung und langjähriger fachspezifischer Berufserfahrung, erweiterter Handlungsspielraum im Rahmen allgemeiner Anweisungen                        |
| <b>Entgeltgruppe 9:</b><br><br>Fachübergreifende Aufgaben nach mindestens zweijähriger Fachschulausbildung (zum Beispiel Meister/Techniker/Betriebswirt), entsprechend erweiterter Handlungsspielraum im Rahmen von allgemeinen Richtlinien                         |
| <b>Entgeltgruppe 10:</b><br><br>Fachübergreifende Aufgaben nach abgeschlossener Hochschulausbildung, weitgehender Handlungsspielraum im Rahmen allgemeiner Richtlinien                                                                                              |
| <b>Entgeltgruppe 11:</b><br><br>Aufgabenstellungen nach abgeschlossener Hochschulausbildung und mehrjähriger fachspezifischer Berufserfahrung oder Fach- und Spezialkenntnissen, weitgehender Handlungsspielraum im Rahmen allgemeiner Richtlinien                  |
| <b>Entgeltgruppe 12:</b><br><br>Aufgabenstellungen nach abgeschlossener Hochschulausbildung und langjähriger fachspezifischer Berufserfahrung, Zielvorgaben als Handlungsspielraum                                                                                  |
| <b>Entgeltgruppe 13:</b><br><br>Aufgabenstellungen nach abgeschlossener Hochschulausbildung und langjähriger umfangreicher fachspezifischer Berufserfahrung und Fach- und Spezialkenntnissen in unterschiedlichen Aufgaben, allgemeine Ziele als Handlungsspielraum |

S. 599 Abb. 152B

Quelle: IG Metall: Daten, Fakten, Informationen 2009, S. 23

Jung, Hans: Personalwirtschaft, 9. Aufl., München 2010.

© Oldenbourg Wissenschaftsverlag

| Tätigkeiten und Aufgaben | Tätigkeiten      Aufgaben      fachübergreifende Aufgaben      Aufgabenstellungen |                          |                               |                      |                                                     |     |                                       |     |                           |     |                                        |                           |                |
|--------------------------|-----------------------------------------------------------------------------------|--------------------------|-------------------------------|----------------------|-----------------------------------------------------|-----|---------------------------------------|-----|---------------------------|-----|----------------------------------------|---------------------------|----------------|
| Wissen und Können        |                                                                                   |                          |                               |                      |                                                     |     |                                       |     |                           |     |                                        |                           |                |
| Hochschule               |                                                                                   |                          |                               |                      |                                                     |     |                                       |     |                           |     |                                        |                           |                |
| Fachschule               |                                                                                   |                          |                               |                      |                                                     |     |                                       |     |                           |     |                                        |                           |                |
| Berufsausbildung         |                                                                                   |                          |                               |                      |                                                     |     |                                       |     |                           |     |                                        |                           |                |
| Anlernen                 |                                                                                   |                          |                               |                      |                                                     |     |                                       |     |                           |     |                                        |                           |                |
| Unterweisen              |                                                                                   |                          |                               |                      |                                                     |     |                                       |     |                           |     |                                        |                           |                |
| Handlungsspielraum       | Anweisungen                                                                       |                          |                               |                      | allgemeine Anweisungen                              |     |                                       |     | allgemeine Richtlinien    |     |                                        | Zielvor-<br>gaben         | allg.<br>Ziele |
|                          | festgelegt                                                                        | weitgehend<br>festgelegt | im Wesentlichen<br>festgelegt | in Teilen festgelegt | innerhalb der<br>Aufgaben<br>Handlungsspielrau<br>m |     | erweiterter<br>Handlungsspielrau<br>m |     | entsprechend<br>erweitert |     | weitgehender<br>Handlungsspielrau<br>m | entsprechend der<br>Ziele |                |
| Entgeltgruppen           | 1                                                                                 | 2                        | 3                             | 4                    | 5                                                   | 6   | 7                                     | 8   | 9                         | 10  | 11                                     | 12                        | 13             |
| in % vom Eck-Entgelt     | 78                                                                                | 79                       | 82                            | 89                   | 100                                                 | 105 | 110                                   | 115 | 121                       | 135 | 155                                    | 176                       | 196            |

S. 600 Abb. 153

Quelle: Vgl. IG Metall: Mein Entgelt-Tarifvertrag – So funktioniert ERA, Berlin-Brandenburg-Sachsen, S. 7



Das Entgelt mit Zusatzstufen in Berlin Brandenburg

|       |               |            |                |                |
|-------|---------------|------------|----------------|----------------|
| EG 1  |               |            |                |                |
| EG 2  |               |            |                |                |
| EG 3  |               |            |                |                |
| EG 4  |               |            |                |                |
| EG 5  |               |            |                |                |
| EG 6  | Eingangsstufe | Hauptstufe | 1. Zusatzstufe | 2. Zusatzstufe |
| EG 7  |               |            |                |                |
| EG 8  |               |            |                |                |
| EG 9  |               |            |                |                |
| EG 10 |               |            |                |                |
| EG 11 |               |            |                |                |
| EG 12 |               |            |                |                |
| EG 13 |               |            |                |                |

S. 600 Abb. 154  
Quelle: IG Metall: Metallnachrichten, Berlin-Brandenburg, 17. Dezember 2004





## Tarif- bzw. Niveaubispiele

- Durch Betriebe und Tarifpartner erarbeitet
- Als Hilfsmittel bei der Eingruppierung der Mitarbeiter
- Beschreiben detailliert Aufgaben an typischen Arbeitsplätzen und werden einzelnen Entgeltgruppen zugeordnet

## Belastungen

- Vorrang des Abbaus von Belastungen durch menschengerechte Arbeitsplatzgestaltung,
- Berücksichtigung von Belastungen und Erschwernissen am Arbeitsplatz



## Ablauf der ERA-Einführung bei Läpple

|                                            |                                                                                                                                                                                                                                                                                                                                                                                                                                           |
|--------------------------------------------|-------------------------------------------------------------------------------------------------------------------------------------------------------------------------------------------------------------------------------------------------------------------------------------------------------------------------------------------------------------------------------------------------------------------------------------------|
| Grundentgelt/<br>Belastungs-<br>regelungen | <ul style="list-style-type: none"><li>– Analyse der eigenen Mitarbeiterstruktur</li><li>– Struktur und Vielfalt der Arbeitsplätze</li><li>– Beschreibung der Tätigkeiten und Abläufe</li><li>– Bewertung anhand Tarifikatalog (Analogverfahren)</li><li>– Zuordnung der Mitarbeiter zu bewerteten Stellen</li></ul>                                                                                                                       |
| Leistungs-<br>entgelt                      | <ul style="list-style-type: none"><li>– Ist-Aufnahme bestehender Systeme</li><li>– Prüfen des Bedarfs einer variablen Entlohnung</li><li>– Abbildung des betrieblichen Zielsystems</li><li>– Aufnahme betrieblicher Kenngrößen und Zielwerte</li><li>– Eignung von Kennzahlen auf Entlohnungskonzepte prüfen</li><li>– Beurteilung von Mitarbeitern durchführen</li><li>– Mitarbeiter- und Beurteilungsgespräche implementieren</li></ul> |

S. 602 Abb. 155A

(in Anlehnung an: Schirle, V.: ERA im Mittelstand. In: Personalwirtschaft, Heft 10/2005, S. 51)

Jung, Hans: Personalwirtschaft, 9. Aufl., München 2010.

© Oldenbourg Wissenschaftsverlag

|                                        |                                                                                                                                                                                                                                                                                                                                                                                                                                                                        |
|----------------------------------------|------------------------------------------------------------------------------------------------------------------------------------------------------------------------------------------------------------------------------------------------------------------------------------------------------------------------------------------------------------------------------------------------------------------------------------------------------------------------|
| Betriebsvereinbarungen und Betriebsrat | <ul style="list-style-type: none"> <li>– Bestandsaufnahme über bestehende Betriebsvereinbarungen</li> <li>– Abstimmung mit dem Betriebsrat über das zeitliche Vorgehen</li> <li>– Regelungen zum Leistungsentgelt herbeiführen</li> <li>– Neue Betriebsvereinbarungen und Richtlinien verabschieden</li> </ul>                                                                                                                                                         |
| DV-Prozesse und -Abläufe               | <ul style="list-style-type: none"> <li>– Prüfung der bestehenden Software auf Eignung</li> <li>– Dokumentation bestehender Abweichungen</li> <li>– Anpassungen herbeiführen</li> <li>– Anpassung von Dokumenten und Formularen</li> <li>– Verfahren der Leistungsentgeltfindung abbilden</li> </ul>                                                                                                                                                                    |
| Information                            | <ul style="list-style-type: none"> <li>– Schulung der ERA-Verantwortlichen</li> <li>– Information und Schulung der Vorgesetzten</li> <li>– Abstimmung der betrieblichen Mitarbeiterinformation mit dem Betriebsrat</li> <li>– Bereitstellung von Ersteinstufung und Leistungsentgelt an Vorgesetzte</li> <li>– Schaffen einer Regelkommunikation durch die Vorgesetzten</li> <li>– Optionale Nutzung eines Intranets mit Workflowfunktion zur Unterstützung</li> </ul> |

S. 602 Abb. 156B

(in Anlehnung an: Schirle, V.: ERA im Mittelstand. In: Personalwirtschaft, Heft 10/2005, S. 51)

Jung, Hans: Personalwirtschaft, 9. Aufl., München 2010.

© Oldenbourg Wissenschaftsverlag



## Betriebliche Sozialleistungen

- 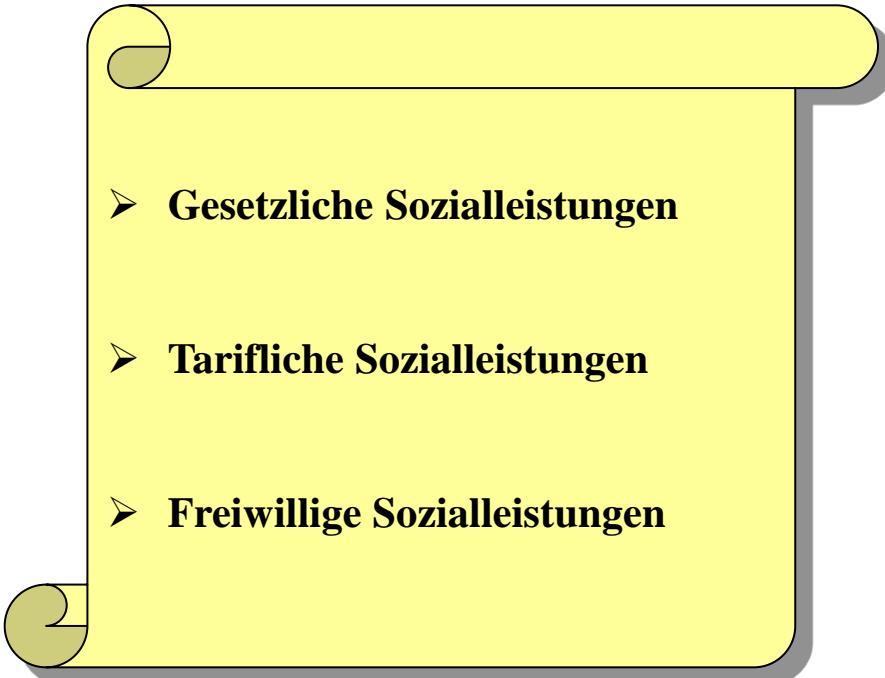
- **Gesetzliche Sozialleistungen**
  - **Tarifliche Sozialleistungen**
  - **Freiwillige Sozialleistungen**

## Gesetzliche Sozialleistungen – Sozialversicherung

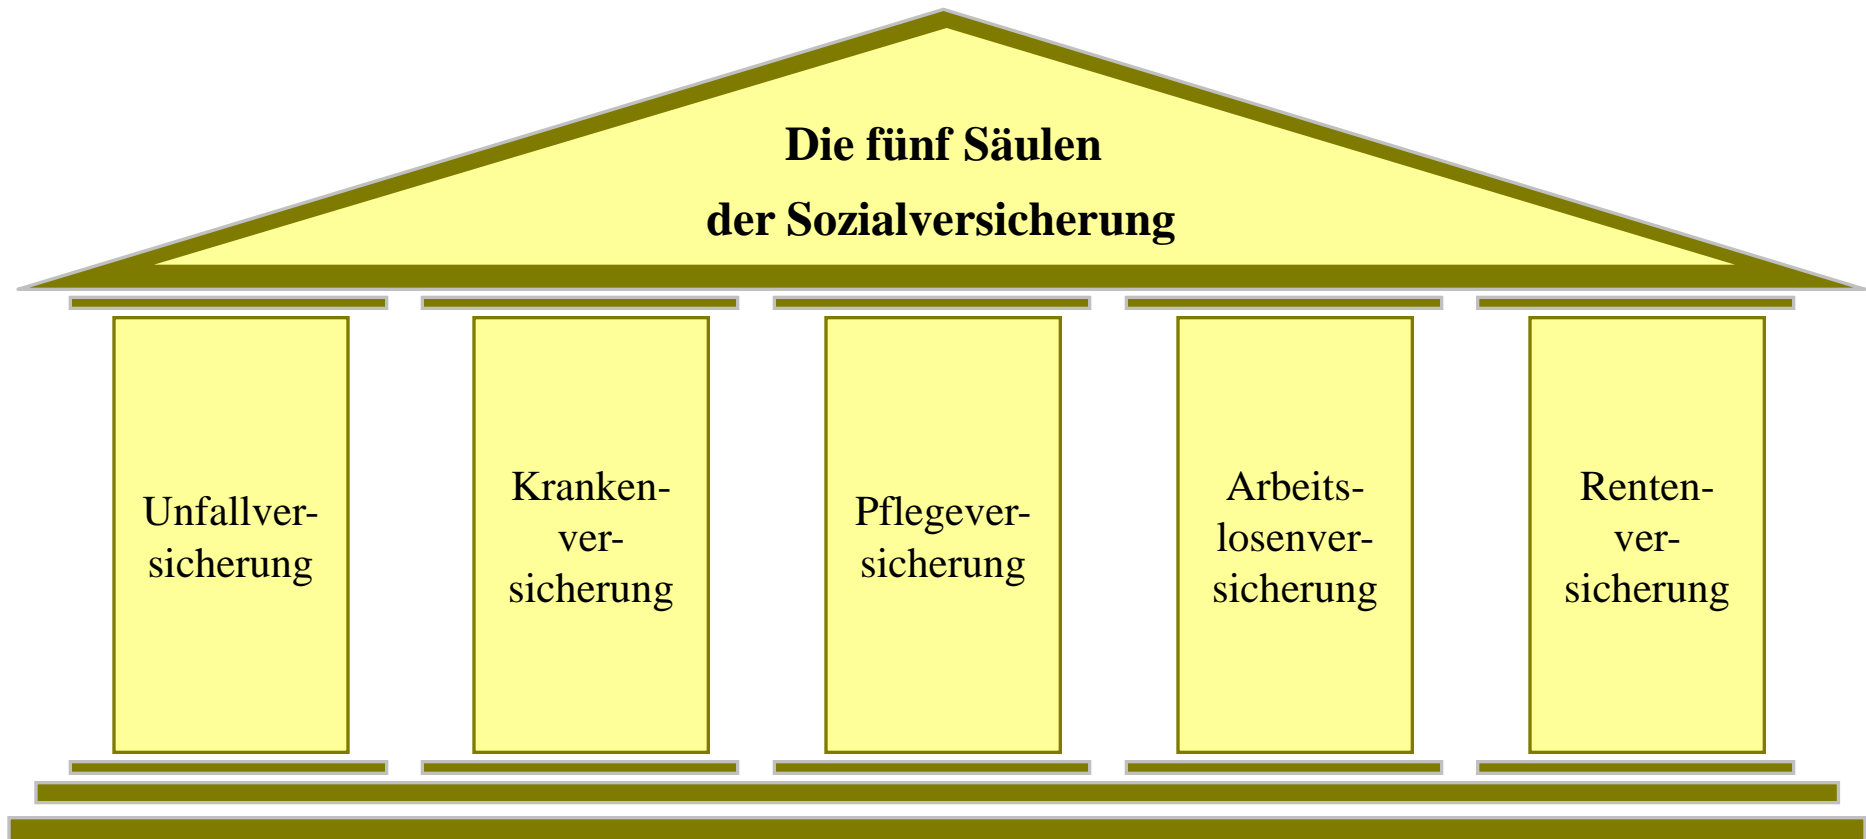

S. 603 Abb. 156

Jung, Hans: Personalwirtschaft, 9. Aufl., München 2010.

© Oldenbourg Wissenschaftsverlag



## Tarifliche Sozialleistungen

Die tariflichen Sozialleistungen werden zwischen der zuständigen Gewerkschaft und dem Arbeitgeber bzw. dem Arbeitgeberverband vereinbart.

Hier besteht seit Jahren ein nahezu lückenloses Netz von Tarifverträgen für die Wirtschaft und Dienstleistungsbereiche, in denen rund 90% aller Arbeitnehmer beschäftigt sind.

Als wesentliche Regelungen dieser Tarifverträge sind zu nennen:

- Arbeitszeitregelungen,
- Urlaub,
- Schutz älterer Arbeitnehmer (z.B. Kündigungsschutz) und
- die Entgeltfortzahlung im Krankheitsfall über die gesetzliche Dauer von sechs Wochen hinaus



## Freiwillige Sozialleistungen

Die Arbeitgeber haben auch im eigenen Interesse viele Gründe, dem Arbeitnehmer freiwillige Sozialleistungen anzubieten:

- Freiwillige Sozialleistungen des Arbeitgebers steigern die Leistung, die Arbeitsmoral, die Betriebsverbundenheit und das Vertrauen der Mitarbeiter in die Unternehmensleitung.
- Sie binden den Arbeitnehmer an das Unternehmen. (z.B. betriebliche Altersrente)
- Sie fördern eine hohe Anziehungskraft auf den Arbeitsmarkt.
- Sie können den Einfluss der Gewerkschaften verringern.
- Sie können für das Unternehmen zu Steuerersparnissen führen.



Weitere Ziele freiwilliger Sozialleistung

| Ziel            | Zielinhalt                                                                                                                                                                                                                                                                                                                                                                                                            |
|-----------------|-----------------------------------------------------------------------------------------------------------------------------------------------------------------------------------------------------------------------------------------------------------------------------------------------------------------------------------------------------------------------------------------------------------------------|
| Motivation      | <ul style="list-style-type: none"><li>- Verbesserung der Leistungsmotivation und Produktivität</li><li>- Förderung des Mitdenkens und Mitentscheidens</li><li>- Erhöhung des Kostenbewusstseins und des persönlichen Einsatzes</li><li>- Anregung des wirtschaftlichen Denkens</li><li>- Verstärkung der Identifikation und des Interesses am Unternehmen</li><li>- Schaffung zusätzlicher Leistungsanreize</li></ul> |
| Finanzierung    | <ul style="list-style-type: none"><li>- Verbesserung der Eigenkapitalbasis und der Kapitalstruktur</li><li>- Schaffung zusätzlicher Liquidität</li><li>- Verbesserung der materiellen Situation der Mitarbeiter</li><li>- Etablierung eines erfolgsabhängigen Entgeltsystems</li></ul>                                                                                                                                |
| Personalpolitik | <ul style="list-style-type: none"><li>- Abrundung des Sozialleistungspaketes</li><li>- Unterstützung bzw. Neuordnung der betrieblichen Altersversorgung</li><li>- Maßnahme der Personalpolitik</li><li>- Anwendung als Führungsinstrument</li></ul>                                                                                                                                                                   |

S. 609 Abb. 157A  
(in Anlehnung an: Klötzl, G./Schneider, H.: Mitarbeiter am Erfolg beteiligen, München 1990, S. 18)

Jung, Hans: Personalwirtschaft, 9. Aufl., München 2010.

© Oldenbourg Wissenschaftsverlag





(Fortsetzung)

| Ziel                  | Zielinhalt                                                                                                                                                                                                           |
|-----------------------|----------------------------------------------------------------------------------------------------------------------------------------------------------------------------------------------------------------------|
| Partnerschaft         | <ul style="list-style-type: none"><li>- Abbau der Konfrontation zwischen Kapital und Arbeit</li><li>- Teilnahme am Unternehmenserfolg</li><li>- Erfüllung des Teilanspruchs auf wirtschaftlichen Gewinn</li></ul>    |
| Gesellschaftspolitik  | <ul style="list-style-type: none"><li>- Beteiligung am Produktivvermögen</li><li>- Sicherung und Ausbau der Wirtschaftsordnung</li></ul>                                                                             |
| Vermögensbildung      | <ul style="list-style-type: none"><li>- Gerechtere Vermögensverteilung</li><li>- Ergänzung der Geldvermögensbildung</li></ul>                                                                                        |
| Mitarbeiter-Potential | <ul style="list-style-type: none"><li>- Reduzierung der Fluktuation</li><li>- Bindung an den Betrieb</li><li>- Verbesserung der Position des Unternehmens am Arbeitsmarkt</li><li>- Fehlzeitenverringerung</li></ul> |

S. 609 Abb. 157B  
(in Anlehnung an: Klötzl, G./Schneider, H.: Mitarbeiter am Erfolg beteiligen, München 1990, S. 18)

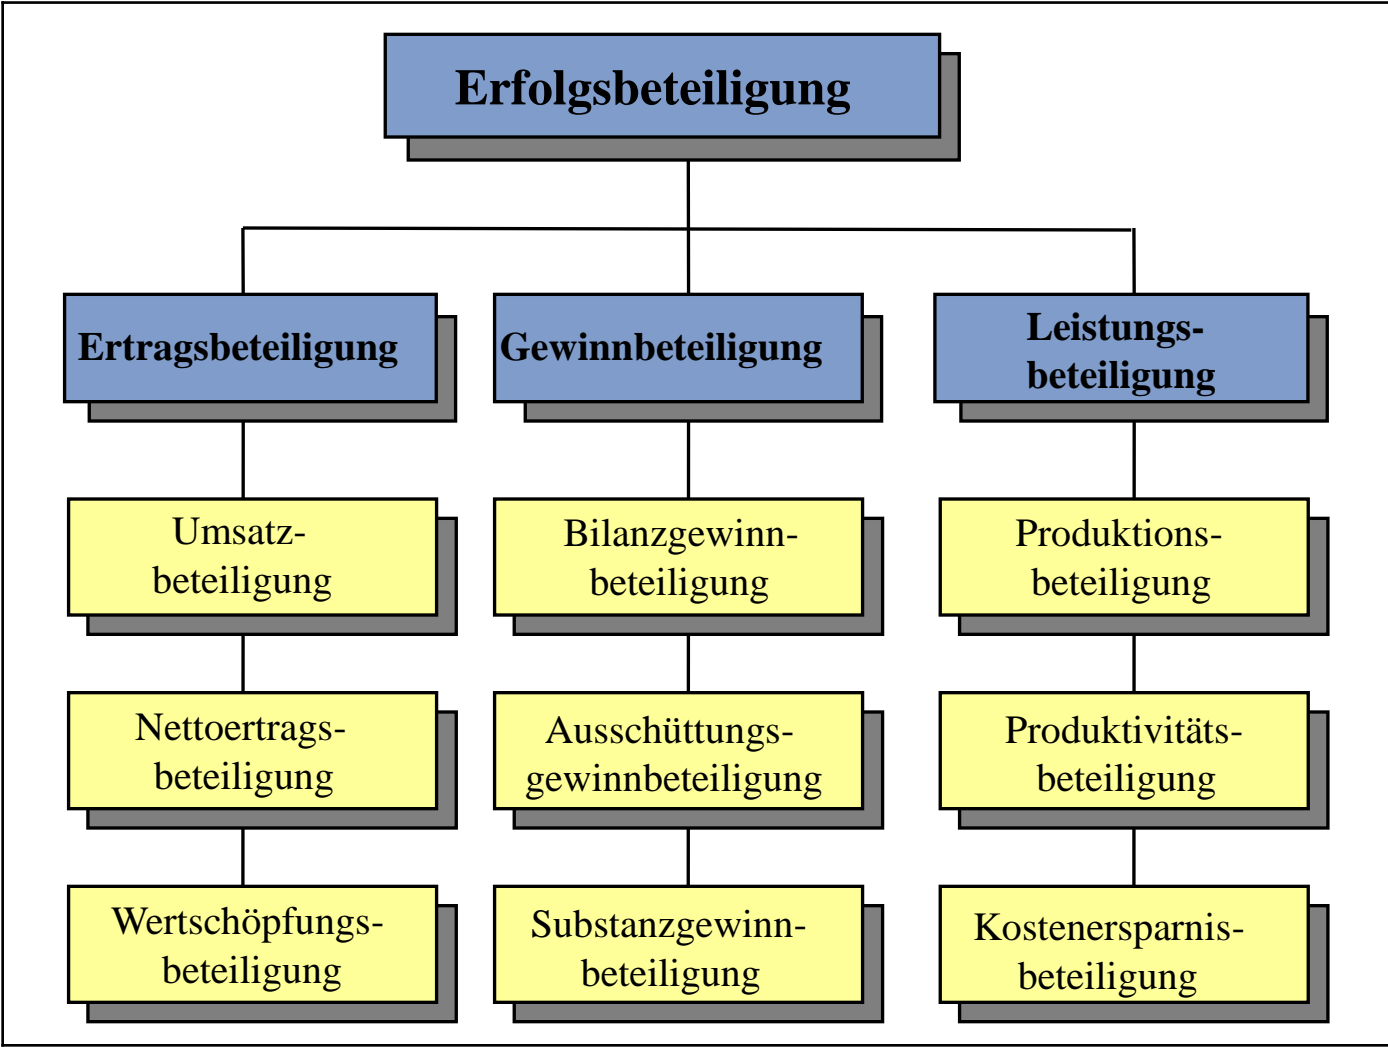

S. 610 Abb. 158  
(in Anlehnung an: Jung, H.: Allgemeine Betriebswirtschaftslehre, 12. Aufl. München/Wien 2010, S. 996)



## Kapitalbeteiligung

- Bei der **direkten Beteiligung** besteht unmittelbar das Beteiligungsverhältnis zwischen den Mitarbeitern und dem Unternehmen. Zwischen jedem einzelnen Mitarbeiter und dem arbeitgebenden Unternehmen werden gesonderte Verträge (meist gleichlautend) geschlossen.
- Bei der **indirekten Beteiligung** bestehen zwischen den Mitarbeitern und dem Unternehmen keine Einzelverträge. Zwischen die Mitarbeiter und das Unternehmen wird eine Institution, ein Pool, ein Sammelbecken für das Mitarbeiter-Kapital geschoben.

Eine "Mitarbeiter-Gesellschaft" sammelt die Einlagen der Mitarbeiter und gibt diese an das Unternehmen in "einem" Vertrag weiter.

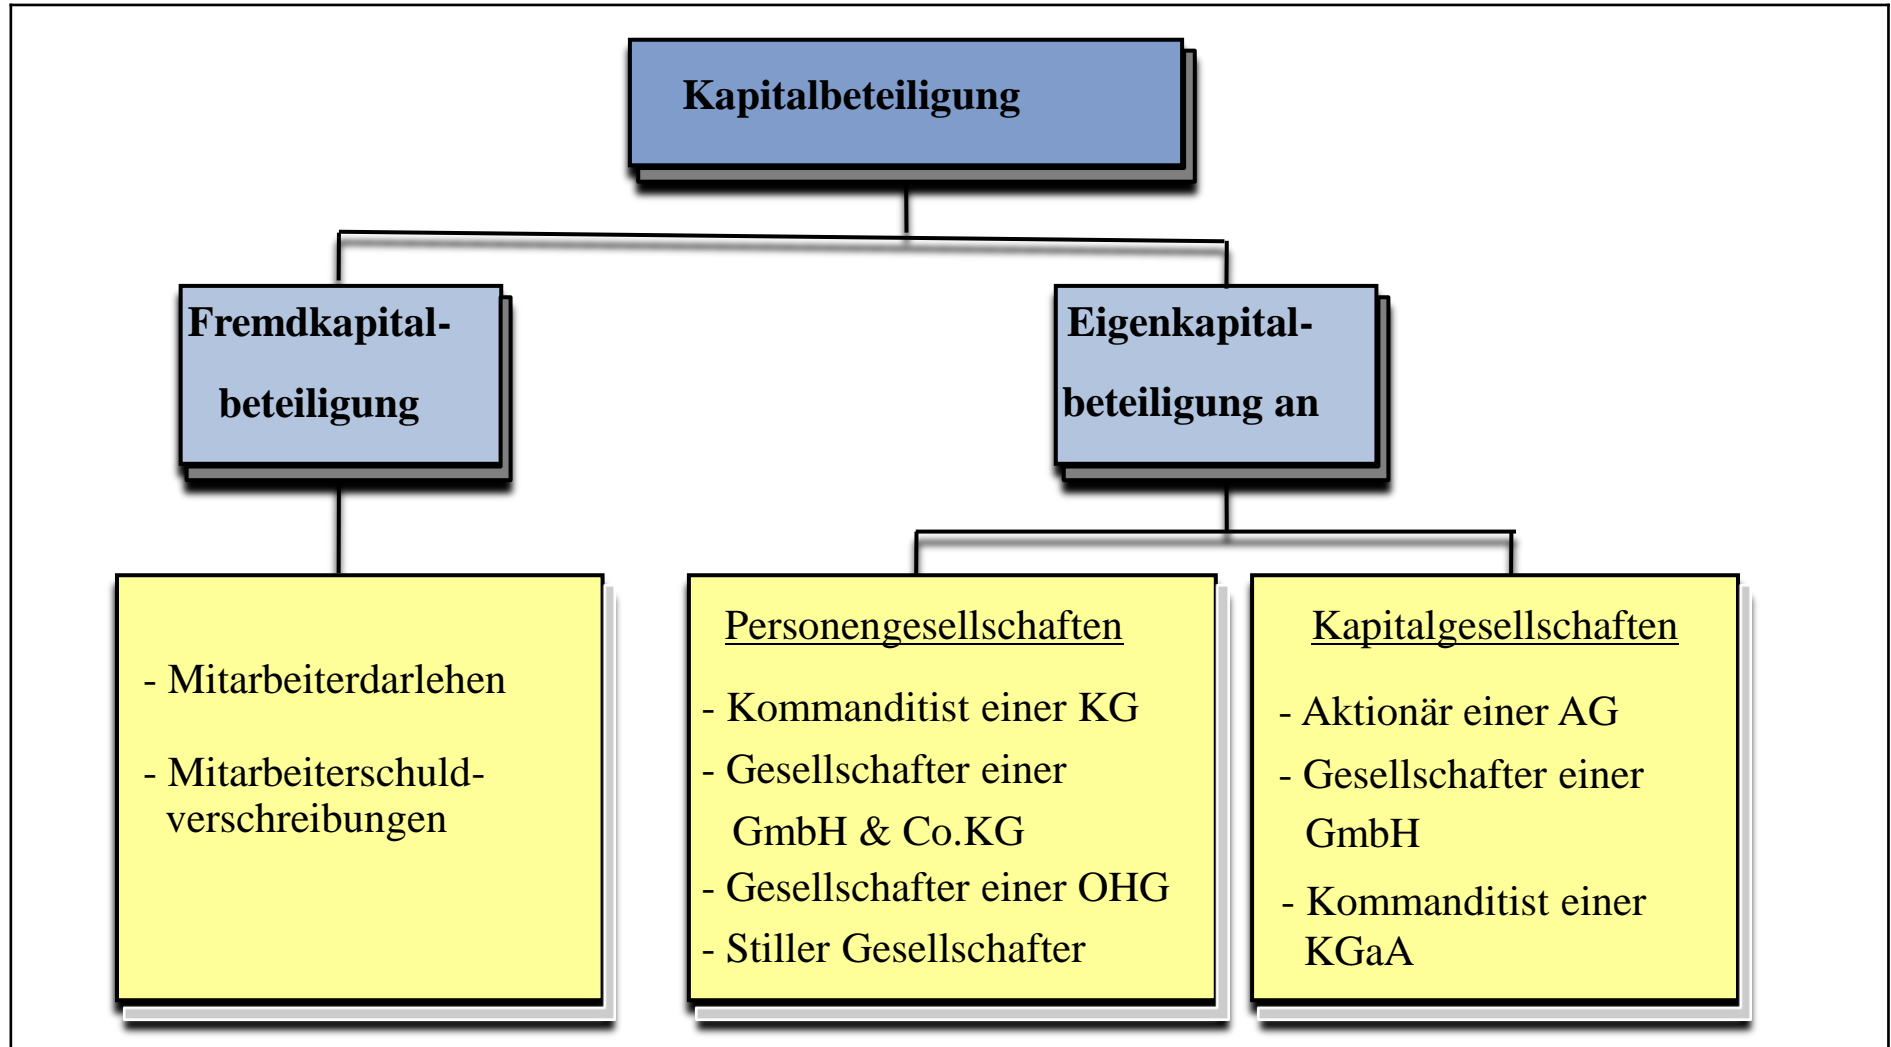

S. 613 Abb. 159



## Motivationsfördernde Arbeitsorganisation

Um die Motivation und die Arbeitszufriedenheit der Mitarbeiter zu verbessern, verfolgen die Unternehmen zwei wesentliche Ziele:

- Der Mitarbeiter soll in der Unternehmensorganisation vom Einzelkämpfer zum **Teammitglied** geschult werden
- Der **Aufgaben und Kompetenzbereich** der Mitarbeiter wird erheblich erweitert

Schon in der Schule werden die zukünftigen Mitarbeiter als Einzelkämpfer trainiert. Diese Gestaltung der Aufgaben setzt sich in der Ausbildung und im Studium fort. Auch durch die bisherigen Organisationsstrukturen in den Unternehmen ist das Einzelkämpfertum gestärkt worden. Jeder Arbeitnehmer ist dort "nur" für seinen Arbeitsbereich zuständig.

Die Betriebsstrukturen müssen so umgestellt werden, dass die Kreativität mehrerer Mitarbeiter genutzt werden kann. Ziel ist eine Identifikation des Mitarbeiters mit dem Produkt und dem Unternehmen

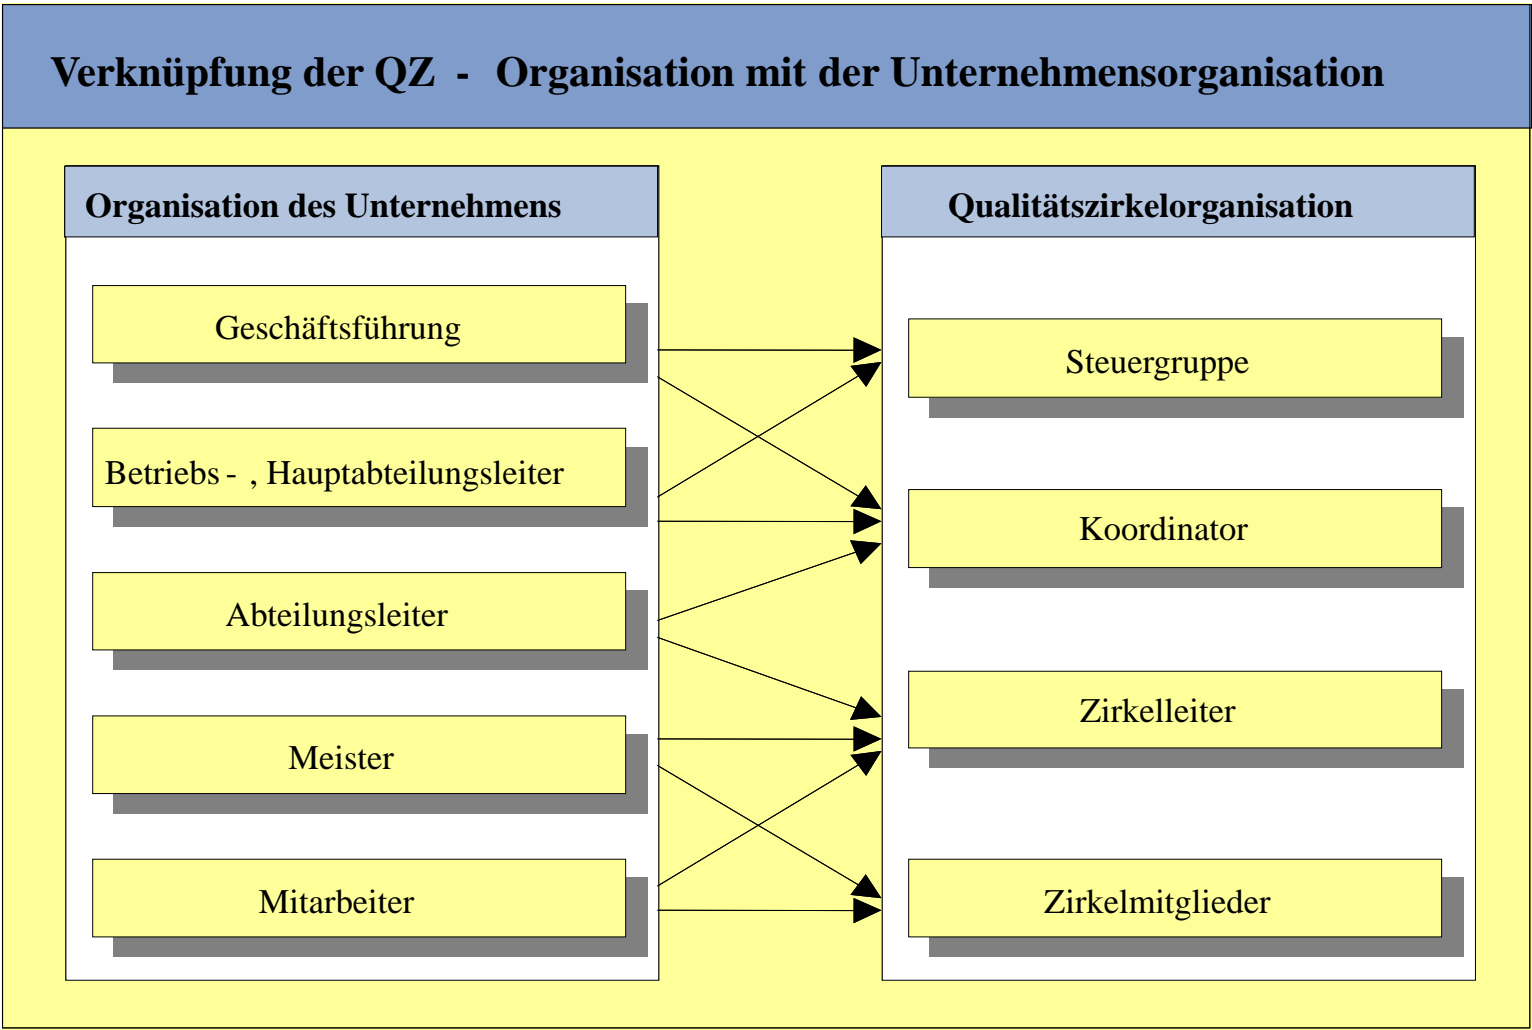

S. 617 Abb. 160  
(in Anlehnung an: Breisig, T.: Betriebliche Sozialtechniken: Handbuch für Betriebsrat und Personalwesen, Neuwied 1990, S 437)



Rechtliche Grundlagen im Qualitätszirkel

| Anwendungsaspekte                                                         | Gesetzliche Grundlagen                                   |
|---------------------------------------------------------------------------|----------------------------------------------------------|
| Mitbestimmungsrecht des Betriebsrates im Qualitätszirkel                  | §§ 2, 80, 87, 95 bis 99 BetrVG                           |
| Ausbildungsmaßnahmen (z.B. für den Koordinator)                           | §§ 96 bis 98 BetrVG                                      |
| Umsetzung von Vorschlägen, die die Arbeitsorganisation verändern          | §§ 90, 91 BetrVG                                         |
| Teilnehmerregelungen als Element der Gestaltung der betrieblichen Ordnung | § 87 Abs. 1 Nr. 1 BetrVG                                 |
| Übertragung von Einzelaufgaben im Sinne einer Versetzung                  | § 95 Abs. 3 BetrVG                                       |
| Allgemeine Grundlagen                                                     | Arbeitnehmererfindungsgesetz,<br>Arbeitsförderungsgesetz |



Rechtliche Grundlagen des betrieblichen Vorschlagswesens

| Anwendungaspekte                                                                                                   | Gesetzliche Grundlagen                          |
|--------------------------------------------------------------------------------------------------------------------|-------------------------------------------------|
| Mitbestimmungsrecht des Betriebsrates bei der Festlegung der Grundsätze des betrieblichen Vorschlagswesens         | § 87 Abs. 1 Nr.12 BetrVG                        |
| Initiativrecht des Betriebsrates bei der Aufstellung von Grundsätzen für das betriebliche Vorschlagswesen          | nach Auffassung des Bundesarbeitsgerichts (BAG) |
| Mitbestimmungsrecht des Betriebsrates bei der Aufstellung der allgemeinen Grundsätze für die Bewertung der Prämien | nach Auffassung des Bundesarbeitsgerichts (BAG) |

S. 623 Abb. 162



## 4. Betriebliche Sozialarbeit

- 4.1 Personalpflege
- 4.2 Die Gesundheit der Mitarbeiter
- 4.3 Die Suchtprobleme
- 4.4 Das HIV-Problem
- 4.5 Der Betrieb und die Familie
- 4.6 Sonstige betriebliche Leistungen

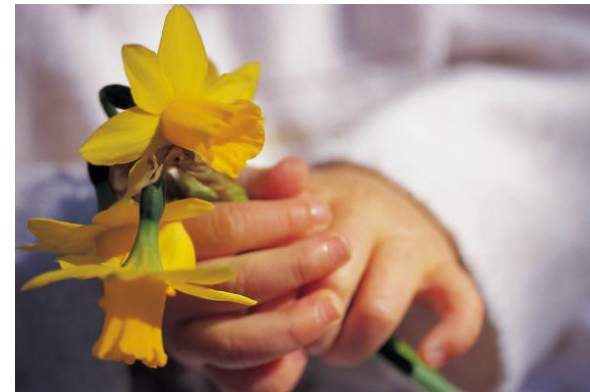



## Gründe für betriebliche Sozialarbeit

- Der Arbeitgeber kann seine Attraktivität für seine Mitarbeiter bei steigenden Frauenerwerbsquoten und bei unzureichender Ausstattung kommunaler Kinderbetreuungseinrichtungen mit **innerbetrieblichen** oder **betriebsnahen Kindertagesstätten** steigern.
- **Betriebswohnungen** werden durch die vom Arbeitgeber geforderte Mobilität der Mitarbeiter aufgrund der häufigeren Arbeitsplatzwechsel und der herrschenden Wohnungsnot interessanter.
- **Betriebsrenten** gewinnen durch die Probleme der staatlichen Alterssicherungssysteme wieder an Bedeutung.
- Die betriebliche Sozialarbeit ist in der Vergangenheit schon der **Vorläufer der staatlichen Sozialversicherung** gewesen. Sie ist für das Unternehmen die **Gestaltungsebene für kreative Sozialleistungs-Regelungen**.

Dies zeigt sich in den aktuellen Bereichen der Suchtkrankenhilfe oder bei Berufsunterbrechungsmodellen, verlängertem Erziehungsurlaub und im Bereich Arbeit und Familie.



## Personalpflege

- Unter Personalpflege versteht man eine **Unternehmensphilosophie**
- Es ist ein System von Prinzipien und Methoden für die Umsetzung von Maßnahmen zur Optimierung individueller sowie betrieblicher Gesundheit und Leistungsfähigkeit.

**Ein „gesundes“ Unternehmen fühlt sich  
für die Gesundheit seiner Mitarbeiter verantwortlich.**

## Ansatzpunkte und Gründe für die Personalpflege

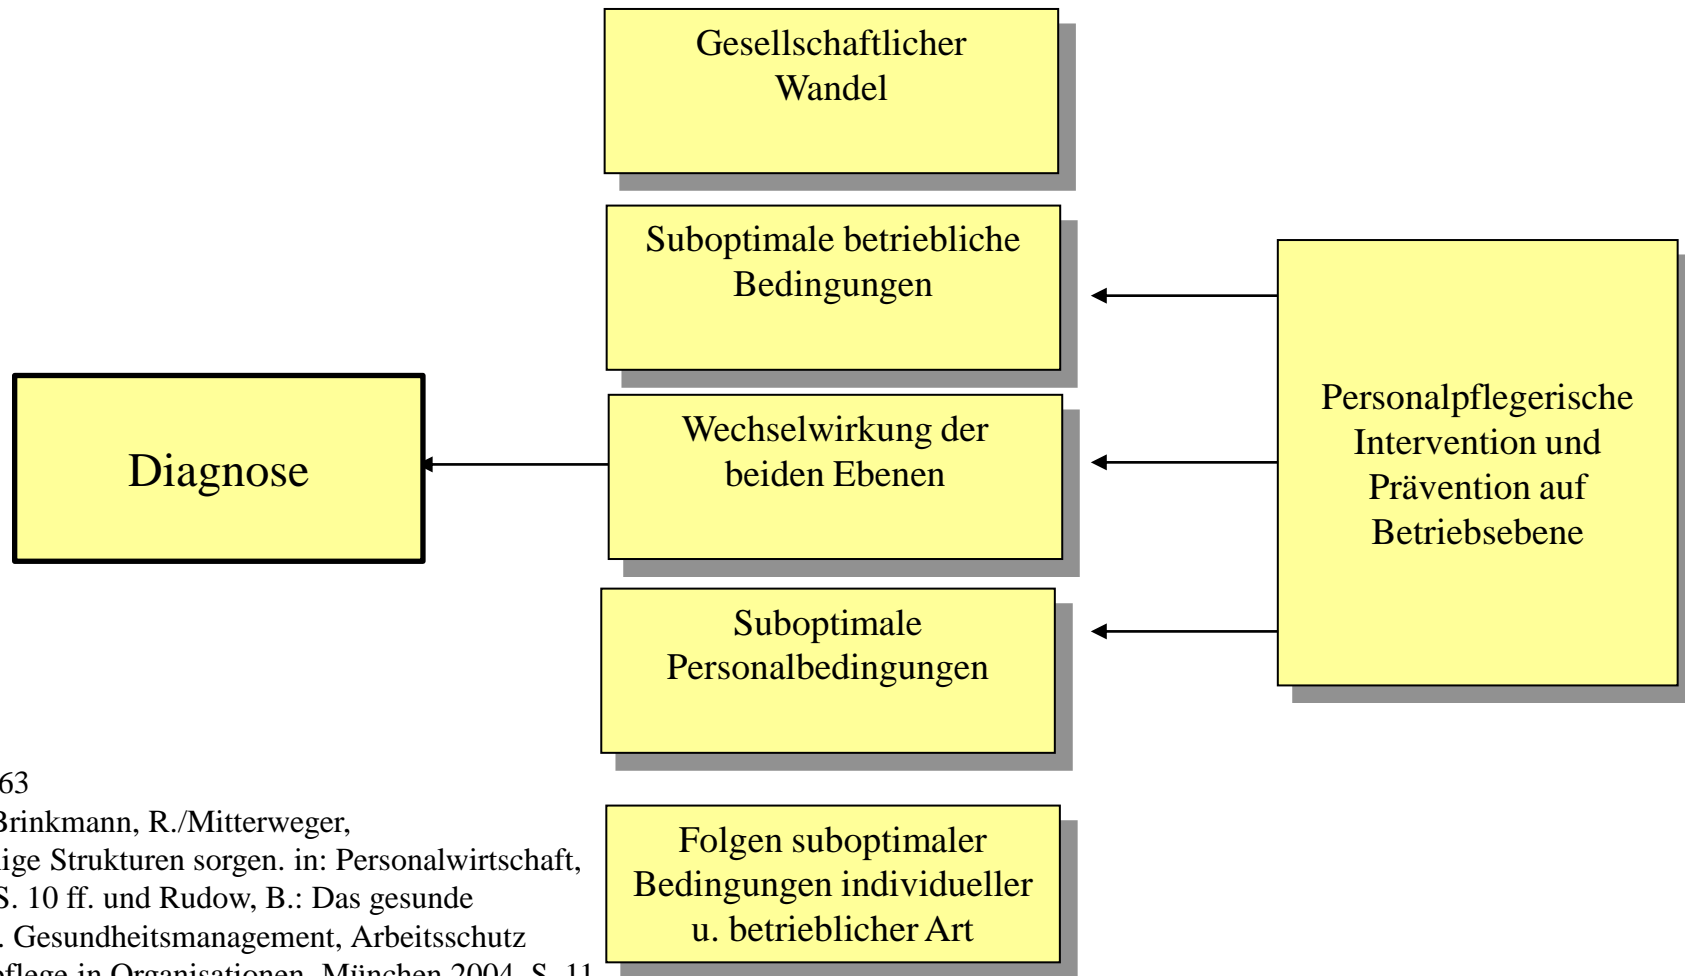

S. 625 Abb. 163

Musolesi, F./Brinkmann, R./Mitterweger,  
E: Für tragfähige Strukturen sorgen. in: Personalwirtschaft,  
Heft 2/1994, S. 10 ff. und Rudow, B.: Das gesunde  
Unternehmen. Gesundheitsmanagement, Arbeitsschutz  
und Personalpflege in Organisationen, München 2004, S. 11

Jung, Hans: Personalwirtschaft, 9. Aufl., München 2010.

© Oldenbourg Wissenschaftsverlag



## Ziele der Personalpflege aus Unternehmenssicht

- Fehlzeiten, Unfälle und der Krankenstand sollen bei den Mitarbeitern reduziert werden (z.B. durch stressreduzierende Maßnahmen).
- Die Fluktuation kann durch aktive Personalpflege verringert werden (z.B. durch betriebliche Altersversorgung o.ä.).
- Gleichzeitig hat die durchgeführte Personalpflege eine interessante Wirkung nach außen. Die Bereitschaft potentieller Mitarbeiter, in das Unternehmen einzutreten, erhöht sich.
- Leistungssteigerung, Arbeitszufriedenheit und zusätzliche Motivation der Mitarbeiter.
- Verbesserung der sozialen Beziehungen und Kontakte der Mitarbeiter untereinander.
- Förderung der Corporate Identity.
- Identifikation der Mitarbeiter mit dem Unternehmen und seiner Philosophie.
- Stärkung des Firmenimages nach außen.



## Mittel der Personalpflege

- Mit Aufklärungskampagnen, Seminaren, usw. kann das Gesundheitswissen der Mitarbeiter verbessert werden. Dies führt zu einer Veränderung der Einstellung zur Gesundheit bei den Mitarbeitern.
- Durch Entspannungstechniken, Raucherentwöhnungen oder ähnliches können dem Mitarbeiter Mittel und Methoden zur Gesundheitsförderung aufgezeigt werden.
- Die Handlungskompetenz des Mitarbeiters muss gesteigert werden. Er soll mehr Verantwortung für seinen Arbeitsplatz übernehmen und ihn so gestalten, dass seine Gesundheit so wenig wie möglich belastet wird.
- Durch nichtmonetäre Anreize wie gute Aufstiegsbedingungen, betriebliche Weiterbildung, usw. wird eine soziale Sicherheit und Chancengleichheit an den Mitarbeiter vermittelt, womit das Betriebsklima und die Arbeitszufriedenheit positiv beeinflusst wird.
- Problem- und Konfliktlösetechniken werden dem Mitarbeiter vorgestellt, um Stress zu vermeiden und ein gutes Arbeitsklima aufrechtzuerhalten.
- Mit Sport- und Fitnessangeboten wird der allgemeine Gesundheitszustand der Mitarbeiter gefördert.



## Grundsätze der Personalpflege

- Personalpflege umfasst nicht ausschließlich besondere Risikogruppen, sondern alle Mitarbeiter in ihren täglichen Lebenszusammenhängen.
- Personalpflege hat das Ziel, die Bedingungen im Unternehmen positiv zu beeinflussen.
- Personalpflege verbindet unterschiedliche, aber einander ergänzende Maßnahmen oder Ansätze, einschließlich Information, Gesetzgebung, steuerliche oder sonstige monetäre Maßnahmen, organisatorische Regelungen sowie spontane Aktivitäten.
- Personalpflege bemüht sich besonders um eine konkrete und wirkungsvolle Teilnahme der Öffentlichkeit.



## Die Gesundheit der Mitarbeiter

Wichtige Bereiche sind:

- Die Herz- Kreislaufvorsorge
- Die Schuldnerberatung
- Psychotherapeutische Beratung
- Das Rückkehrgespräch





Arten der Prävention bei Herz- Kreislaufproblemen

| Primärprävention                                                                                                                                                                                                                                                                                 | Sekundärprävention                                                                                                                                                                                                                                       | Tertiärprävention                                                                                                           |
|--------------------------------------------------------------------------------------------------------------------------------------------------------------------------------------------------------------------------------------------------------------------------------------------------|----------------------------------------------------------------------------------------------------------------------------------------------------------------------------------------------------------------------------------------------------------|-----------------------------------------------------------------------------------------------------------------------------|
| <p>Die Primärprävention beinhaltet die Beeinflussung von Lebensstilen und Lebensweisen.</p> <p>Bevor die Krankheitszeichen auftreten, werden dem Mitarbeiter optimale Verhaltensregeln gegeben, damit er ein breitgefächertes Gesundheitswissen erlangt und sich entsprechend verhalten kann</p> | <p>Die Sekundärprävention ist bei der Früherkennung von Vorstadien und ersten Krankheitserscheinungen von Bedeutung.</p> <p>Als Präventionsmittel werden hier ebenfalls Maßnahmen der Verhaltensbeeinflussung als auch schon Medikamente eingesetzt.</p> | <p>Bei Maßnahmen während oder nach Krankheiten, die schlimmeres verhüten sollen, spricht man von der Tertiärprävention.</p> |

Konkrete Präventivmaßnahmen könnten sein

- Seminare zur Stressbewältigung
- Ernährungsberatung
- Sportprogramme (z.B. tägliche Bürogymnastik, Wandern und Walking, Radfahren, Schwimmen)

S. 628 Abb. 164  
(in Anlehnung an: Kastner, M.: Personalmanagement heute, Landsberg/Lech 1990, 328 ff.)



## Die Schuldnerberatung

- Nicht abtragbare Schuldenberge sind für die Betroffenen erhebliche Stressfaktoren. Als Folge können Schwierigkeiten mit Kollegen, mangelnde Arbeitsmotivation, ein deutlicher Leistungsabfall durch Zweitjobs oder der Alkoholmissbrauch eintreten.

Diese Folgen zu verhindern liegt im Interesse aller Unternehmen.

- Der Betrieb kann **interventive** und **präventive** Maßnahmen ergreifen:



## **Interventive Maßnahmen**

Für Mitarbeiter, die von der Schuldenproblematik betroffen sind, kann mit einer firmeninternen Beratung geholfen werden. Der Betriebsrat oder die Personalabteilung sollte für den Betroffenen jederzeit zur Verfügung stehen und ihm diskret Informationen geben, wo und wie ihm geholfen werden kann.

Die direkte Hilfe kann aus begrenzter finanzieller Hilfe bestehen. Sie kann zum Beispiel aus einem Unterstützungsverein finanziert werden.

## **Präventive Maßnahmen**

Die Schuldenproblematik kann in Rahmen von Betriebsversammlungen oder in Betriebszeitschriften angesprochen und behandelt werden.

In Form eines Vortrages durch einen Vertreter der Personalabteilung oder des Betriebsrates können die potenziellen Gefahren und Risiken der privaten Verschuldung für den Mitarbeiter aufgezeigt werden. Aber auch die Einladung von Experten, die Vertreter



## Psychotherapeutische Beratung

Eine psychotherapeutische Beratung und Betreuung kann z.B. erfolgen bei:

- einer HIV-Infektion,
- psychischen Störungen wie z.B. Depressionen,
- Erkrankungen wie z.B. Krebs,
- Suchtproblemen oder
- krankheitsbedingten Problemen wie z.B. Isolation, Angst (Verlust des Arbeitsplatzes).



## Das Rückkehrgespräch

Das Rückkehrgespräch ist ein Instrument für den Abbau von Fehlzeiten. Es wird von einer Führungskraft mit dem Mitarbeiter, der gerade nach einer überstandener Krankheit in den Betrieb zurückgekehrt ist, über seine Krankheit geführt.

### Mögliche **Ziele** eines **Rückkehrgesprächs**:

- Nach seiner Abwesenheit soll dem zurückkehrenden Mitarbeiter die Arbeitsaufnahme erleichtert werden, indem man ihn über offizielle wie nichtoffizielle Ereignisse während seiner Abwesenheit informiert.
- Das Rückkehrgespräch soll in Erfahrung bringen, ob die Abwesenheit des Mitarbeiters ursächlich mit seiner Arbeitssituation in Verbindung steht.
- Weiterhin soll das Rückkehrgespräch dem Mitarbeiter verdeutlichen, dass er als Mensch und nicht (nur) die mit ihm verbundene Arbeitskraft vermisst wurde.



## Die Suchtprobleme

Mögliche Ziele eines Rückkehrgesprächs :

- Auffallend hohe Fehlzeiten
- Information durch den Betroffenen
- Hinweise von Kollegen des Betroffenen
- Auffallend mehr Arbeitsunfälle
- Nachlassende Arbeitsleistung
- Auffälliges Verhalten



Fehlzeitbedingten Kosten

| Direkte anfallende Kosten                                                                                       | Indirekte anfallende Kosten                                   | Sonstige Kosten                                                                                  |
|-----------------------------------------------------------------------------------------------------------------|---------------------------------------------------------------|--------------------------------------------------------------------------------------------------|
| - Kosten der Entgeltfortzahlung im Krankheitsfall                                                               | - Arbeitgeberbeiträge zur Krankenversicherung                 | - Kostenanteile Personalwesen, Lohnbüro (z.B. Administrieren der Fehlzeiten)                     |
| - Anteilige Kosten für Ausfallzeiten durch unbezahlte Krankheitstage (z.B. Urlaubsgeld, 13. Monatsgehalt, usw.) | - Gesetzliche Unfallversicherung                              | - Kapital- und Sachkosten wegen ungenutzter Kapazitäten                                          |
| - Zuschüsse für Heilverfahren                                                                                   | - Freiwillige Versicherungsbeiträge zu Krankenkassen          | - Sachkosten aufgrund von Terminüberschreitungen                                                 |
| - Mehrkosten für Heilverfahren                                                                                  | - Personal- und Sachaufwendungen für die Betriebskrankenkasse | - Ersatzbeschaffung mit Mitarbeitern (Personal-Leasing)                                          |
|                                                                                                                 | - Betrieblicher Gesundheitsdienst                             | - Kosten durch Abstimmung, Improvisation im Betrieb wegen plötzlichen Fehlens eines Mitarbeiters |

S. 633 Abb. 165  
(in Anlehnung an: Derr, D.: Fehlzeiten im Betrieb. Ursachenanalyse und Vermeidungsstrategien, Köln 1995, S. 14. und Rudow, B.: Das gesunde Unternehmen. Gesundheitsmanagement, Arbeitsschutz und Personalpflege in Organisation, München 2004, S. 20)

Jung, Hans: Personalwirtschaft, 9. Aufl., München 2010.

© Oldenbourg Wissenschaftsverlag



## Das Alkoholproblem

Wie aus arbeitsmedizinischen Untersuchungen hervorgeht, beeinträchtigen schon 0,3 Promille Alkoholgehalt im Blut die Leistung und die Arbeitsqualität erheblich. Auf Alkoholkonsum sind mindestens 30% aller Arbeitsunfälle zurückzuführen, da das Unfallrisiko mit zunehmender Blutalkoholkonzentration beträchtlich steigt:

| Blutalkoholkonzentration | Unfallrisiko                    |
|--------------------------|---------------------------------|
| 0,0 Promille             | Unfallrisiko normal             |
| 0,3 Promille             | 2,0-fach erhöhtes Unfallrisiko  |
| 0,6 Promille             | 3,0-fach erhöhtes Unfallrisiko  |
| 0,8 Promille             | 4,5-fach erhöhtes Unfallrisiko  |
| 1,0 Promille             | 6,5-fach erhöhtes Unfallrisiko  |
| 1,2 Promille             | 9,5-fach erhöhtes Unfallrisiko  |
| 1,5 Promille             | 16,0-fach erhöhtes Unfallrisiko |

S. 634 Abb. 166

Quelle: DHS (Hrsg.): Substanzbezogene Störung am Arbeitsplatz, Hamm 2007, S. 11

Jung, Hans: Personalwirtschaft, 9. Aufl., München 2010.

© Oldenbourg Wissenschaftsverlag





Motive für die  
Lösung des  
Alkoholproblems

| Unternehmensleitung                                                                                                                                                                                                                                                                                                                                                                                                                                                                  |
|--------------------------------------------------------------------------------------------------------------------------------------------------------------------------------------------------------------------------------------------------------------------------------------------------------------------------------------------------------------------------------------------------------------------------------------------------------------------------------------|
| <b>Senkung alkoholbedingter Folgekosten:</b> Fehlzeiten, Produktionsausfälle, Personalwechsel, Fürsorgeaufwand<br><b>Kontinuierliche Betriebsabläufe:</b> Vermeidung von Planänderungen wegen Personalproblemen, Ter-minüberschreitungen oder Unfällen<br><b>Personalfürsorge:</b> Gesundheitsvorsorge, wirtschaftliche Sicherheit<br><b>Gutes Betriebsklima:</b> Harmonie, Zufriedenheit, Engagement<br><b>Positives Firmenimage:</b> Geltung als Firma mit guter sozialer Fürsorge |
| Betriebsrat                                                                                                                                                                                                                                                                                                                                                                                                                                                                          |
| <b>Personalfürsorge:</b> Erhaltung bzw. Wiederherstellung der Gesundheit, Arbeitsplatzsicherung, Schutz vor sozialem Abstieg<br><b>Gutes Betriebsklima:</b> Verständnis, Solidarität, Spannungsfreiheit<br><b>Mitwirkung:</b> Einflussnahme auf Maßnahmenplanung, Wahrung der Personalbelange und Mitwirkungsrechte, Profilierungschancen                                                                                                                                            |
| Vorgesetzte                                                                                                                                                                                                                                                                                                                                                                                                                                                                          |
| <b>Optimale Arbeitserledigung:</b> Arbeitsmenge, Arbeitsgüte, Termineinhaltung<br><b>Disziplin:</b> Beachten von Anordnungen, Pünktlichkeit, Ordnung, korrektes Auftreten<br><b>Arbeitssicherheit:</b> Vermeidung unfallbedingter Arbeitsablaufstörungen oder Zusatzbelastungen, Schutz vor Haftung aufgrund eigener Mitverantwortung                                                                                                                                                |
| Mitarbeiter                                                                                                                                                                                                                                                                                                                                                                                                                                                                          |
| <b>Erhaltung/Wiederherstellung:</b> eigener Gesundheit, Wohlbefinden, Aussehen, Unversehrtheit, Leistungsfähigkeit, Lebenserwartung<br><b>Konfliktvermeidung:</b> Ärger mit Vorgesetzten, Streit mit Kollegen, Vorwürfe zu Hause<br><b>Karrieresicherung:</b> Image, Arbeitsplatzerhalt, Aufstiegschancen<br><b>Vermeidung materieller Nachteile:</b> Alkoholkosten, Verdiensteinbußen, Führerscheinverlust, Kündigung                                                               |

S. 636 Abb. 167



## Lösungsstrategien für die Lösung des Alkoholproblems

- Das wichtigste Mittel ist das Mitarbeitergespräch.
- Zeigt dies Gespräch keine Wirkung, dann ist die Einschaltung der Personalabteilung unerlässlich (offizieller Charakter).
- Zusätzlich empfiehlt es sich, einen Suchthelfer einzubeziehen.



## Das Medikamentenproblem

In der Bundesrepublik Deutschland gibt es ca. **1,3 % bis 2 %**, d.h. bis zu **800.000** Medikamentenabhängige, wobei die einschleichende, langandauernde und niedrige Dosierung besonders häufig vorkommt.

In die **Medikamentenabhängigkeit** führen nicht so einschneidende Lebensereignisse wie Scheidung oder Arbeitslosigkeit, sondern eher die alltäglichen Dinge wie berufliche Über- und Unterforderung, chronischer Alltagsärger, Langeweile oder Einsamkeit.

Diese Faktoren führen zum Stress und können die Person ähnlich wie beim Alkoholproblem aus dem Gleichgewicht bringen.



## Das Raucherproblem

Untersuchungen zeigen, dass auch Passivraucher ein ca. 30% höheres Gesundheitsrisiko tragen als Nicht-Passiv- und Nicht-Raucher.

Die Sterblichkeit an allen Krebsarten wie z.B. Lungen-, Mund-, Rachen-, Nierenkrebs usw. steigt somit um ein Drittel. Auch die Ausmaße der Arterienverkalkung (Raucherbein) und Gefäßbeschädigungen werden erheblich vom Nikotingenuss beeinflusst.

Raucher-Entwöhn-Programme können im Unternehmen die Gesundheitspflege unterstützen. Rauchen ist wie jede andere Tätigkeit erlernt worden und kann wie jede Angewohnheit auch wieder abgelegt werden.



## Gesetzliche Grundlagen

**Der Nicht-Raucher hat rechtlich einen Anspruch auf einen tabakrauchfreien Raum.**

Durch den Arbeitgeber sind daher entsprechende Schutzmaßnahmen wie Rauchverbot oder Raumlüftung zu ergreifen.



## Das HIV-Problem

Bei dem Umgang mit den infizierten Kollegen ist das Problem der Ansteckungsgefahr weniger wichtig. Der Umgang mit verletzten HIV-Infizierten ist leicht und schnell erlernbar.

**Das größte Problem besteht in der psychischen Verfassung der Kollegen.**

Als Unternehmensleitung oder als Vorgesetzter darf man nicht den Fehler machen, dass man die HIV-Krankheit als Privatsache betrachtet und keine fürsorglichen Maßnahmen in diesem Bereich ergreift.

Aufklärung und Verhaltensempfehlungen können viel Leid und zusätzlich erhebliche Kosten einsparen.



Im Wesentlichen können betriebliche Maßnahmen zur Leid- und Kostenreduzierung nur präventiv sein. Allen Mitarbeitern sollte verdeutlicht werden, dass ein Mitarbeiter, der HIV infiziert ist:

- in gleicher Weise wie andere chronisch Kranke behandelt wird,
- dass natürlich Vertraulichkeit gewahrt wird,
- dass das Unternehmen jede notwendige Hilfe gibt, damit die soziale und betriebliche Einbindung erhalten bleibt,
- keine Ansteckungsgefahr für die Kollegen darstellt,
- nicht aufgrund seiner Krankheit von seiner bisherigen Tätigkeit entbunden oder entlassen wird, sondern entsprechend seiner Leistung eingesetzt wird,
- dass man bemüht ist, die Mitarbeiter besser aufzuklären,
- und dass die Ausgrenzung und Diskriminierung von Aids-Kranken oder HIV-Positiver nicht menschengerecht ist.



Ansätze betrieblicher Frauenförderung :

| Betrieb (Ifd.-Nr.)                  | 1 | 2 | 3             | 4           | 5           | 6 | 7             | 8          | 9       | 10         | 11               |
|-------------------------------------|---|---|---------------|-------------|-------------|---|---------------|------------|---------|------------|------------------|
| Voraussetzung Betriebszugehörigkeit |   |   |               |             | 5 Jahre     |   | 3 Jahre       | 5 Jahre    | 3 Jahre | 1 Jahr     | unbe-<br>fristet |
| Familienfreundliche Weiterbildung   | ● | ● | ●             | ●           | ●           |   | ●             | ●          | ●       |            | ●                |
| Familienpause                       |   |   | 6 Mo-<br>nate |             |             |   | 6 Mo-<br>nate |            | 1 Jahr  |            | > 1<br>Jahr      |
| Kontakthalteangebote                | ● | ● | ●             | ●           | ●           | ● | ●             | ●          | ●       | ●          | ●                |
| Return-Programme                    |   | ● | ●             | ●           | ●           |   | ●             |            | ●       |            | ●                |
| Wiedereinstellungs-<br>zusage       |   |   | 10<br>Jahre   | 10<br>Jahre | 10<br>Jahre |   | 7<br>Jahre    | 5<br>Jahre |         | 7<br>Jahre |                  |
| Flexible Arbeitszeit                | ● | ● |               | ●           | ●           | ● | ●             | ●          | ●       | ●          |                  |
| Kinderbetreuung                     |   |   |               |             |             |   | ●             |            |         |            |                  |
| Dienstzeitanrechnung                |   |   | ●             | ●           | ●           |   | ●             | ●          | ●       | ●          | ●                |
| Versorgung                          |   | ● |               | ●           | ●           |   | ●             |            | ●       |            | ●                |
| Pflegeurlaub                        | ● |   |               |             | ●           |   |               |            |         |            | ●                |

S. 643 Abb. 168

(in Anlehnung an: Gessner, B.: Betriebliche Gestaltungsmöglichkeiten zur besseren Vereinbarkeit von Familie und Beruf.  
In: Betriebliche Sozialpolitik, hrsg. von der Angestelltenkammer Bremen/Mittelstädt, Hamburg 1993, S. 72)



## Aufgaben und Lösungsmodelle der betrieblichen Kinderfürsorge

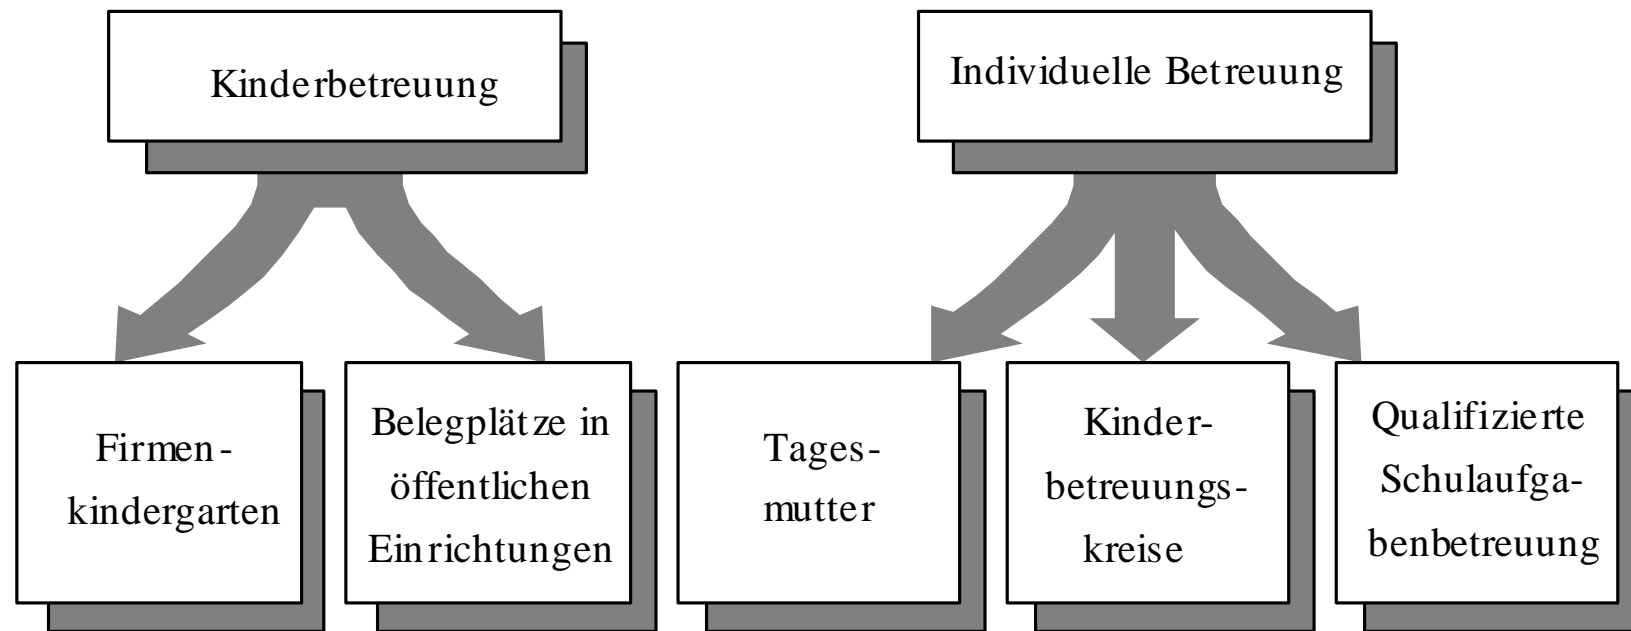

S. 646 Abb. 169

Jung, Hans: Personalwirtschaft, 9. Aufl., München 2010.

© Oldenbourg Wissenschaftsverlag



Motive und Ziele der Frauenförderung

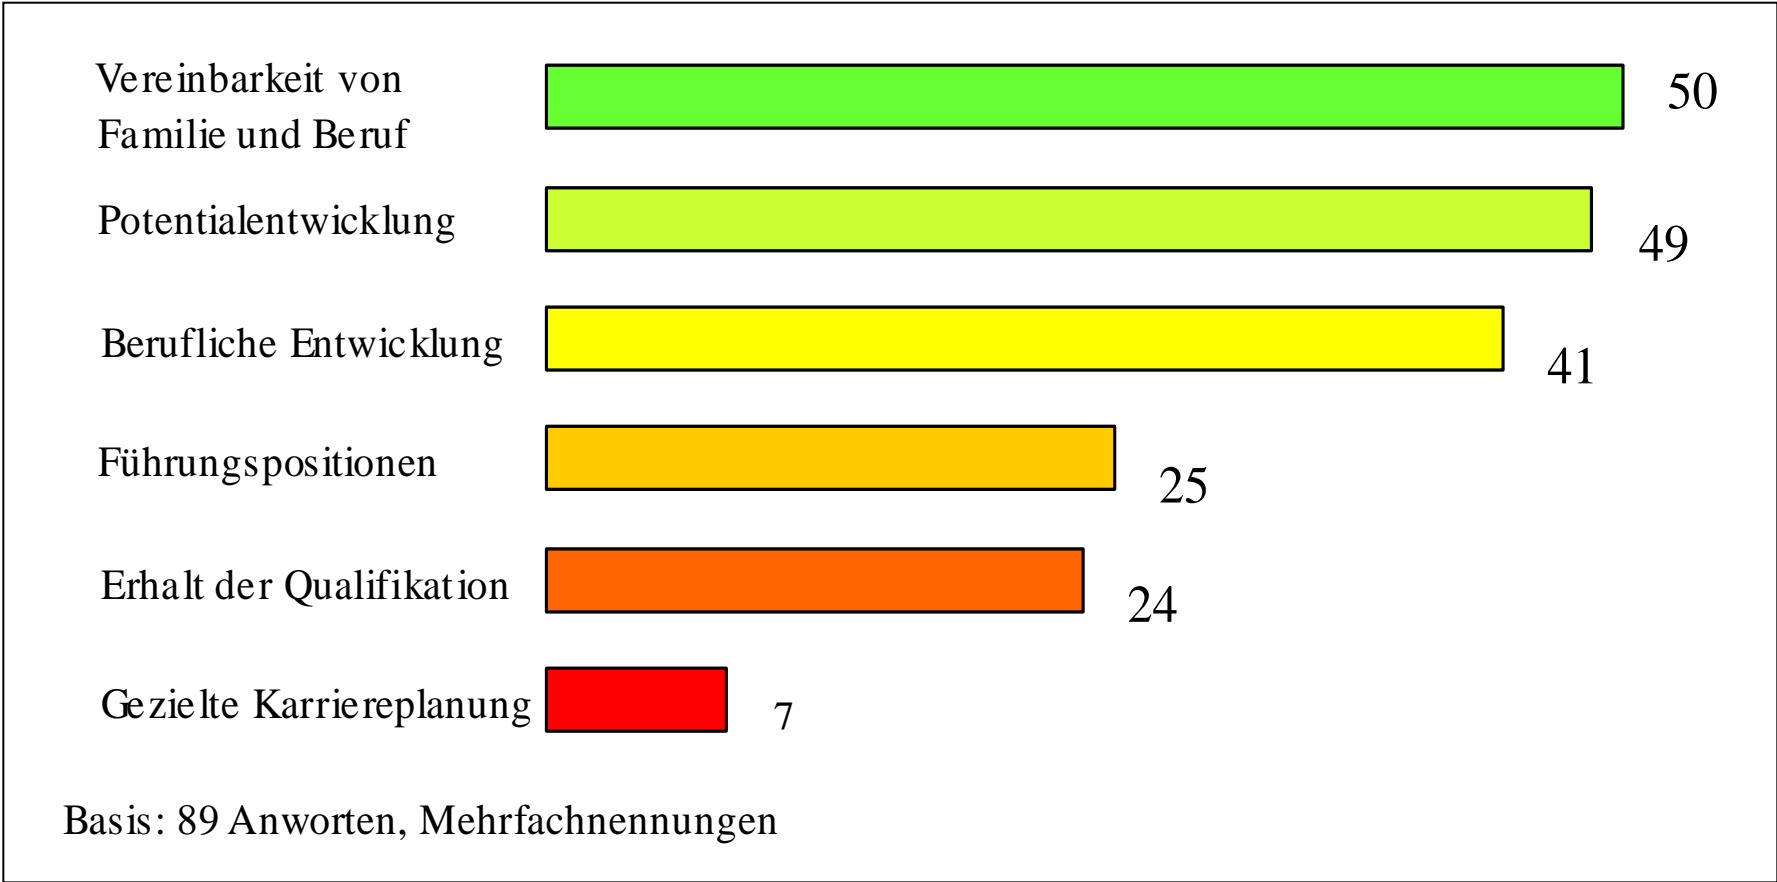

S. 649 Abb. 170

Quelle: Busch, C.: Frauen haben viel zu bieten, hrsg. vom Bundesministerium für Bildung und Wissenschaft und dem Bildungswerk der Hessischen Wirtschaft e.V., Bonn 1994, S. 20.

Jung, Hans: Personalwirtschaft, 9. Aufl., München 2010.

© Oldenbourg Wissenschaftsverlag



Sonstige betriebliche Sozialleistungen

| Rang | Angebotene Sozialleistung                                                | Häufigkeit |
|------|--------------------------------------------------------------------------|------------|
| 1    | Weihnachtsgeld                                                           | 96,9       |
| 2    | Urlaubsgeld                                                              | 94,2       |
| 3    | Jubiläumszuwendung                                                       | 91,4       |
| 4    | Kündigungsschutz für ältere oder lang beschäftigte Arbeitnehmer          | 72,9       |
| 5    | Betriebliche Altersversorgung                                            | 68,5       |
| 6    | Kostenlose oder verbilligte Parkplätze                                   | 64,7       |
| 7    | Betriebliche Weiterbildungsangebote                                      | 61,3       |
| 8    | Betriebsärztlicher Dienst                                                | 54,8       |
| 9    | Kantine                                                                  | 53,4       |
| 10   | Verpflegungszuschüsse oder Catering-Service                              | 49,3       |
| 11   | Arbeitgeberdarlehen                                                      | 43,8       |
| 12   | Verbilligter, betriebsinterner Warenverkauf oder vglbare Vergünstigungen | 36,3       |
| 13   | Betriebssport                                                            | 36,0       |
| 14   | Suchtkrankenhilfe                                                        | 32,9       |
| 15   | Berufsunterbrechungsmodelle                                              | 29,5       |
| 16   | Verlängerter Erziehungsurlaub                                            | 27,7       |
| 17   | Fahrkostenerstattung                                                     | 27,7       |
| 18   | Besondere Arbeitsplätze für Leistungsgeminderte (Behinderte)             | 27,7       |

S. 650 Abb. 171A



(Fortsetzung)

| Rang | Angebotene Sozialleistung                                                 | Häufigkeit |
|------|---------------------------------------------------------------------------|------------|
| 19   | Betriebliche Sozialfonds                                                  | 96,9       |
| 20   | Betriebliches Kindergeld bzw. Familienzuschlag                            | 94,2       |
| 21   | Zuschüsse zu betrieblichen Freizeitaktivitäten                            | 91,4       |
| 22   | Betriebliche Regelungen für einen vorgezogenen Übergang in den Ruhestand  | 72,9       |
| 23   | Maßnahmen zur Gesundheitsförderung                                        | 68,5       |
| 24   | Hilfe und Zuschüsse bei der Wohnraumbeschaffung                           | 64,7       |
| 25   | Besondere Arbeitszeitregelungen für die ersten Jahre der Kinderbetreuung  | 61,3       |
| 26   | Anpassung der Arbeitsbedingungen an die Erfordernisse älterer Mitarbeiter | 54,8       |
| 27   | Betriebswohnung (nicht nur für den Hausmeister)                           | 53,4       |
| 28   | Gewinnbeteiligung (nicht nur für die Führungskräfte)                      | 49,3       |
| 29   | Betriebliche Regelungen für einen schrittweise Übergang in den Ruhestand  | 43,8       |
| 30   | Sozialbetreuung (Betriebsfürsorge)                                        | 36,3       |
| 31   | Qualifizierungsangebote während der Familienpause                         | 36,0       |
| 32   | Schuldnerberatung                                                         | 32,9       |
| 33   | Besondere Angebote für ausländische Mitarbeiter (z.B. Sprachkurse)        | 29,5       |
| 34   | Job-Ticket                                                                | 27,7       |
| 35   | Betriebskindergarten oder betriebsnaher Kindergarten                      | 27,7       |

S. 650 Abb. 171B
