# Supplementary material
Source: publisher site journal article supplement (https://www.degruyterbrill.com/publication/isbn/9783486719048/downloadAsset/9783486719048_Folien--de.zip)
Supplement: Supplementary file 5 [file 9783486719048_Folien--de.zip]

# Teil E

## Neue Tendenzen und Entwicklungen der Personalwirtschaft

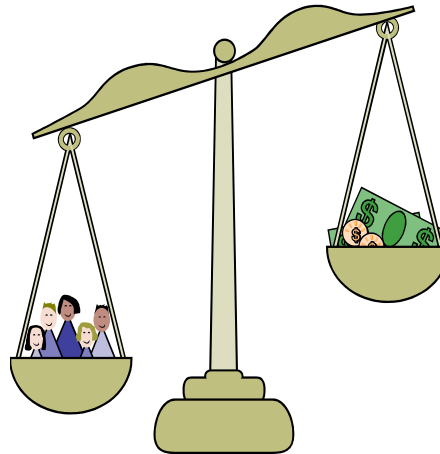

Januar 2011

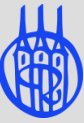

## **Inhaltsverzeichnis**

- 1. Veränderte Rahmenbedingungen**
- 2. Konsequenzen für die Personalwirtschaft**
- 3. Trends im Personalmanagement und in der Organisation**
- 4. Personalwirtschaft und Personalcontrolling**

# 1. Veränderte Rahmenbedingungen der Personalwirtschaft

- 1.1 Wertewandel und Leistungsmotivation
- 1.2 Die demografische Entwicklung auf dem Arbeitsmarkt
- 1.3 Internationalisierung und europäische Integration
- 1.4 Technologischer Wandel und Qualifikationsbedarf

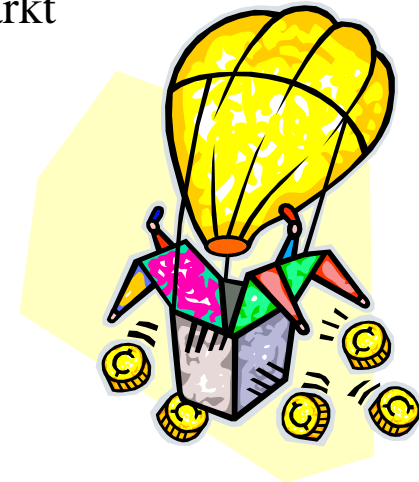

# Trends der Personalpolitik

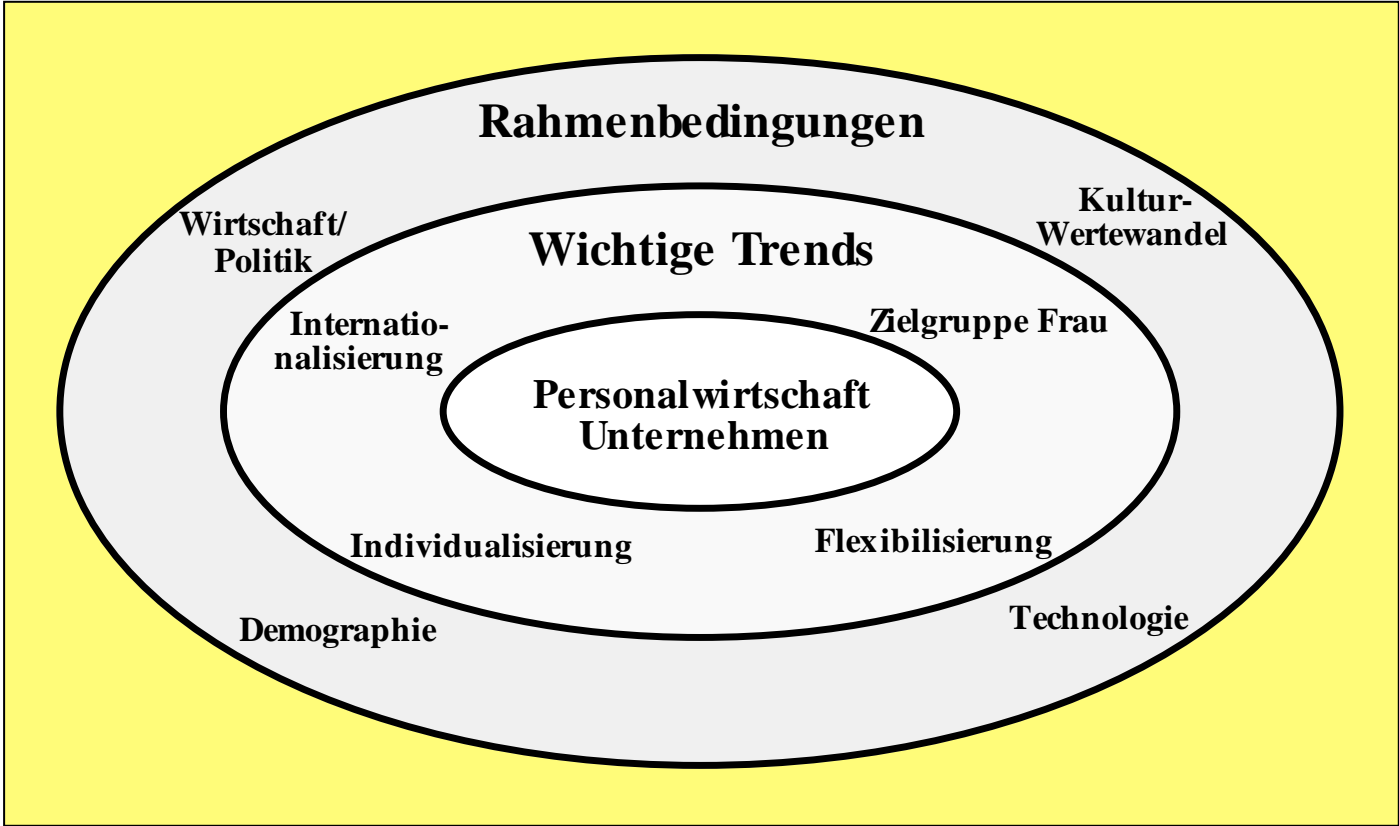

S. 837 Abb. 1

## Das Wertesystem des Individuums

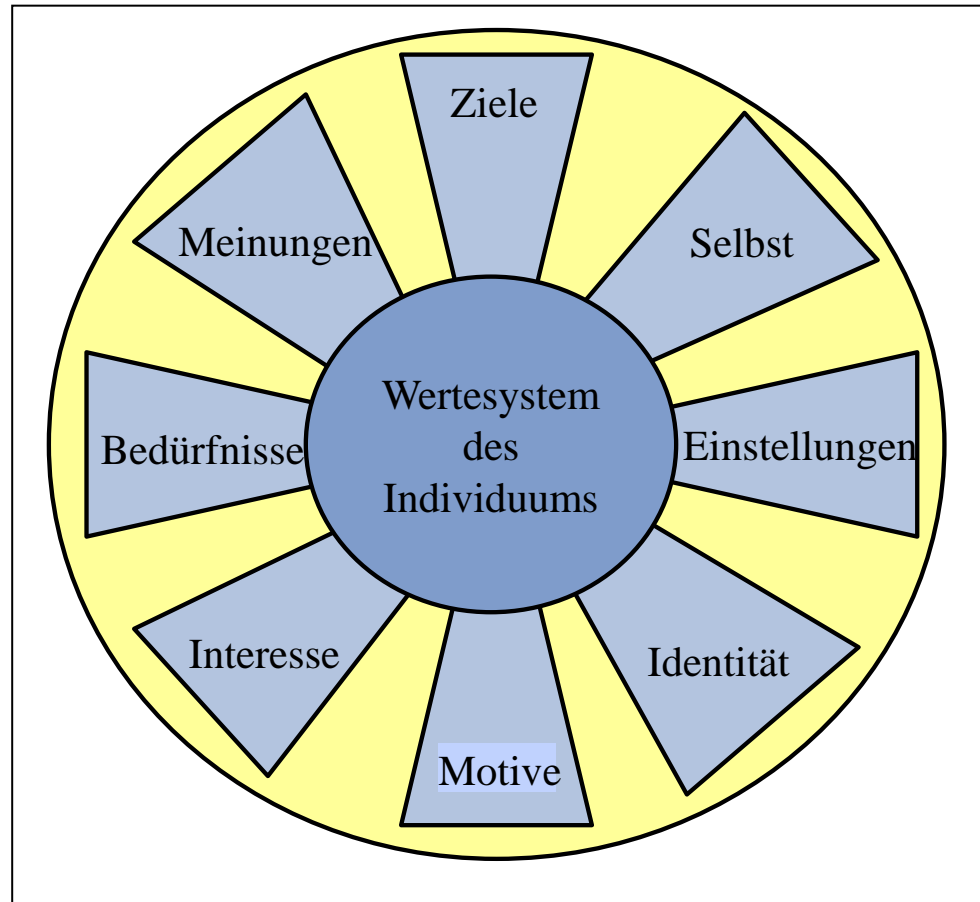

S. 839 Abb. 2

(in Anlehnung an: Klages, H.: Wertewandel. Rückblick, Gegenwartsanalyse, Ausblick. In: Personal 2000: Visionen und Strategien erfolgreicher Personalarbeit, hrsg. von Feix, W.E., Wiesbaden 1991, S. 53 ff.)

Jung, Hans: Personalwirtschaft, 9. Aufl., München 2010.

© Oldenbourg Wissenschaftsverlag

# Wertewandel und Spannungsfeld von Individuum und Gesellschaft

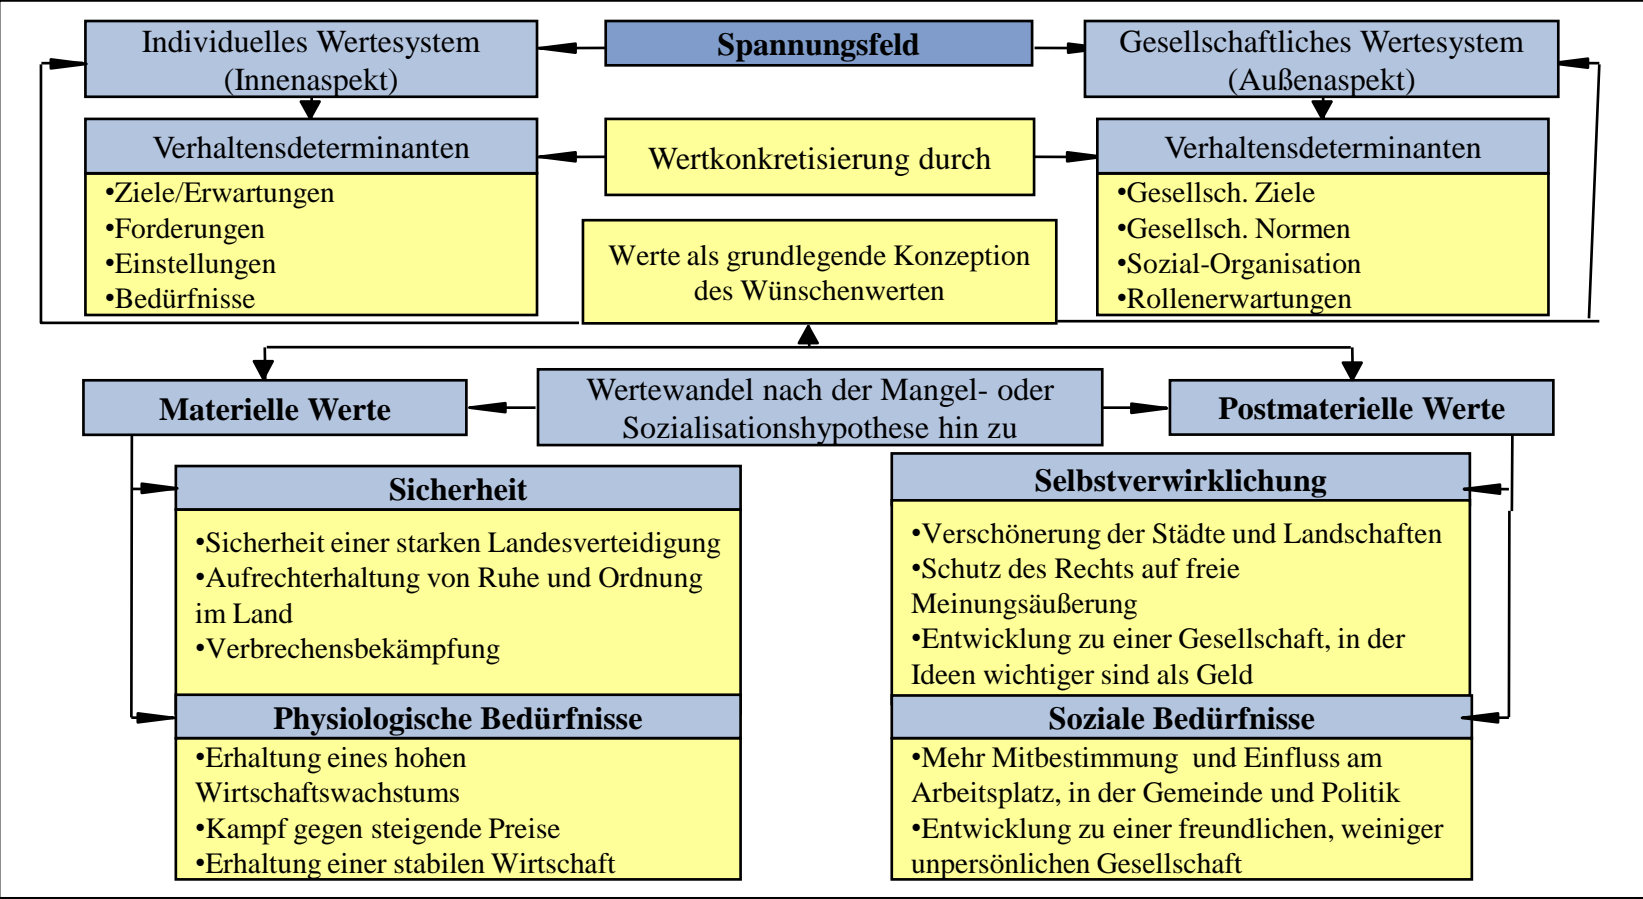

S. 840 Abb. 3  
(in Anlehnung an: Staehle, W.H.:Management. Eine verhaltenswissenschaftlichen Perspektive, 6. Aufl., München 1991; S.11 und S.157; Inglehart, R.: Modernisierung und Postmodernisierung, Frankfurt am Main/New York 1998, S.173)

# Wertewandlungsclub in den sechziger Jahren

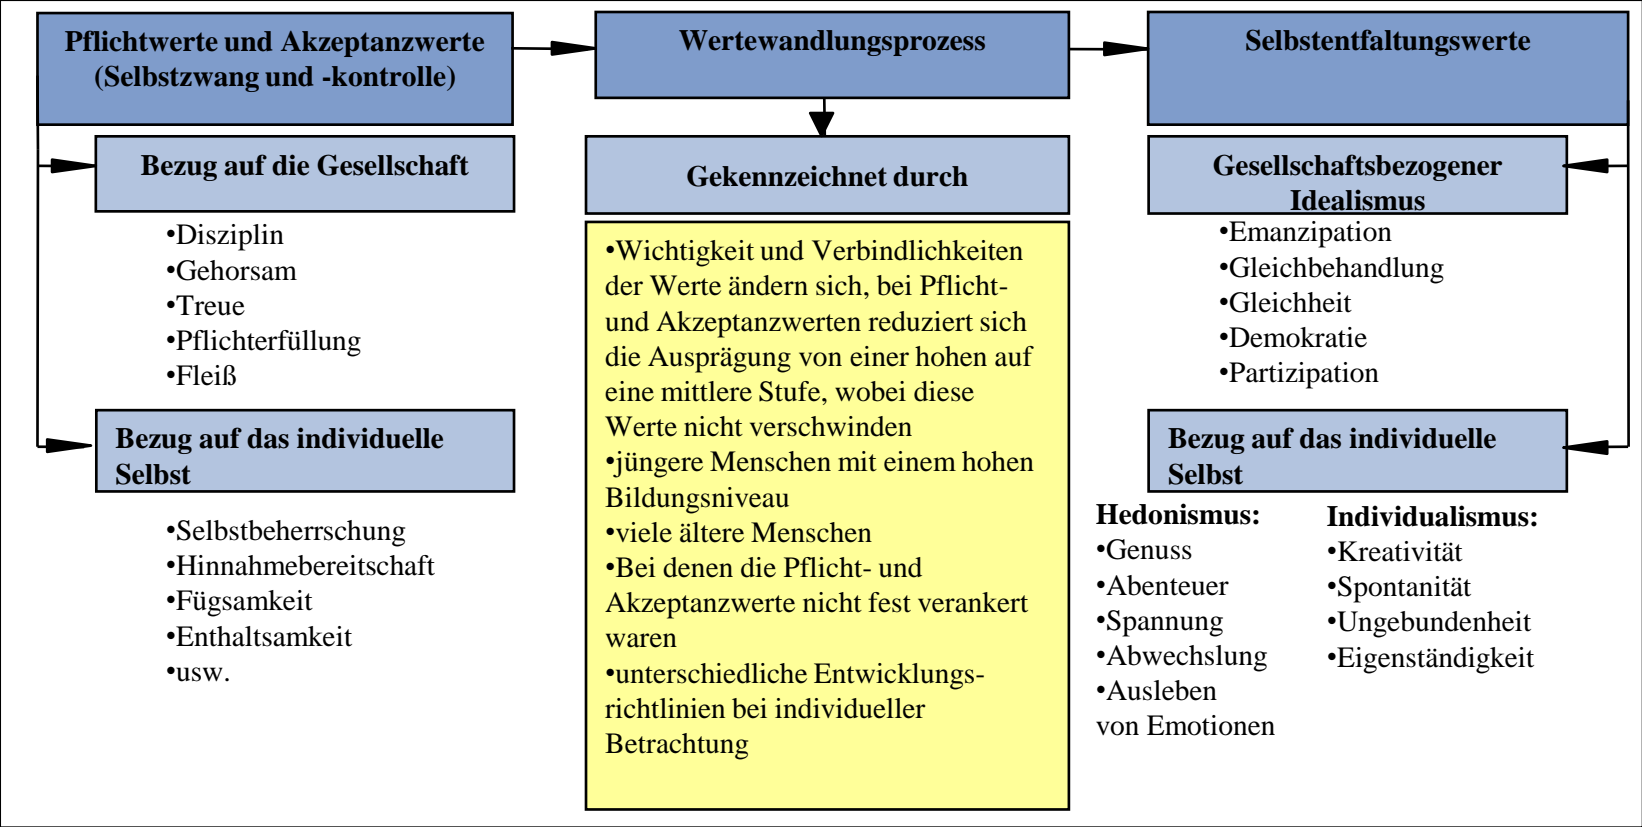

S. 841 Abb. 4  
(in Anlehnung an: Klages, H.: Wertewandel. Rückblick, Gegenwartsanalyse, Ausblick, In: Personal 2000: Visionen und Strategien erfolgreicher Personalarbeit, hrsg. Von Feix, W. E., Wiesbaden 1991, S. 11 u. S. 60.)

# Gewichtung der Pflicht- und Akzeptanzwerte

| 1981                  | 1999                   | 2003                     |
|-----------------------|------------------------|--------------------------|
| 1. Fleiß              | 1. Fleiß               | 1. Fleiß                 |
| 2. Pflichterfüllung   | 2. Selbstvertrauen     | 2. Selbstvertrauen       |
| 3. Selbstvertrauen    | 3. Selbstständigkeit   | 3. Kontaktfähigkeit      |
| 4. Leistungsstreben   | 4. Pflichterfüllung    | 4. Pflichterfüllung      |
| 5. Selbstständigkeit  | 5. Ehrgeiz             | 5. Selbstständigkeit     |
| 6. Selbstbeherrschung | 6. Kontaktfähigkeit    | 6. Ehrlichkeit/Offenheit |
| 7. Kontaktfähigkeit   | 7. Höflichkeit         | 7. Leistungsstreben      |
| 8. Aufgeschlossenheit | 8. Höflichkeit         | 8. Leistungsstreben      |
| 9. Ehrgeiz            | 9. Selbstbeherrschung  | 9. Ehrgeiz               |
| 10. Höflichkeit       | 10. Aufgeschlossenheit | 10. Aufgeschlossenheit   |



## Typologie des Wertespektrums

→ Typ 1: Der ordnungsliebende Konventionalist - **Zwanghafte Persönlichkeit**

- bevorzugt materielle Bedürfnisbefriedigung
- neigt zu autoritärem Verhalten
- Desinteresse an gesellschaftlichen Themen
- Desinteresse an New- Infos

→ Typ 2: Der aktive Realist - **Schizoide Persönlichkeit**

- hohe Leistungs- und Verantwortungsbereitschaft,
- Eigeninitiative
- starkes Engagement,
- Wunsch nach Selbstentfaltung

→ Typ 3: Der perspektivenlose Resignierte - **Depressive Persönlichkeit**

- richtet sich nach Normen
- Scheut großen Aufwand
- kein eigener Antrieb

→ Typ 4: Der nonkonforme Idealist - **Hysterische Persönlichkeit**

- starke Tendenz zur Selbstentfaltung
- will sich nicht vereinnahmen lassen

# Veränderung des Wertespektrums

| Verhältnis der Generationen zur Leistung                                                                                                      |                                                                                           |                                                                                                                                |
|-----------------------------------------------------------------------------------------------------------------------------------------------|-------------------------------------------------------------------------------------------|--------------------------------------------------------------------------------------------------------------------------------|
| Frühere Jugendgeneration                                                                                                                      | Die 68er Generation                                                                       | Die 89er Generation                                                                                                            |
| Leistung ist selbstverständliche Pflicht jedes tüchtigen Menschen, der was auf sich hält. Ein Gebot der Anständigkeit und sittlichen Pflicht. | Typische Forderung der bürgerlichen "Leistungsgesellschaft" und ihrer Ausbeutungstendenz. | Leistung muss man bringen, falls man etwas erreichen will; Leistung erbringt man doch automatisch, wenn die Arbeit Spaß macht! |

S. 843 Abb. 5  
 Quelle: Klages, H.: Wertewandel. Rückblick, Gegenwartsanalyse, Ausblick, , In: Personal 2000: Visionen und Strategien erfolgreicher Personalarbeit, hrsg. Von Feix, W. E., Wiesbaden 1991, S. 64 f.

# Die Entwicklung der Arbeitstugenden

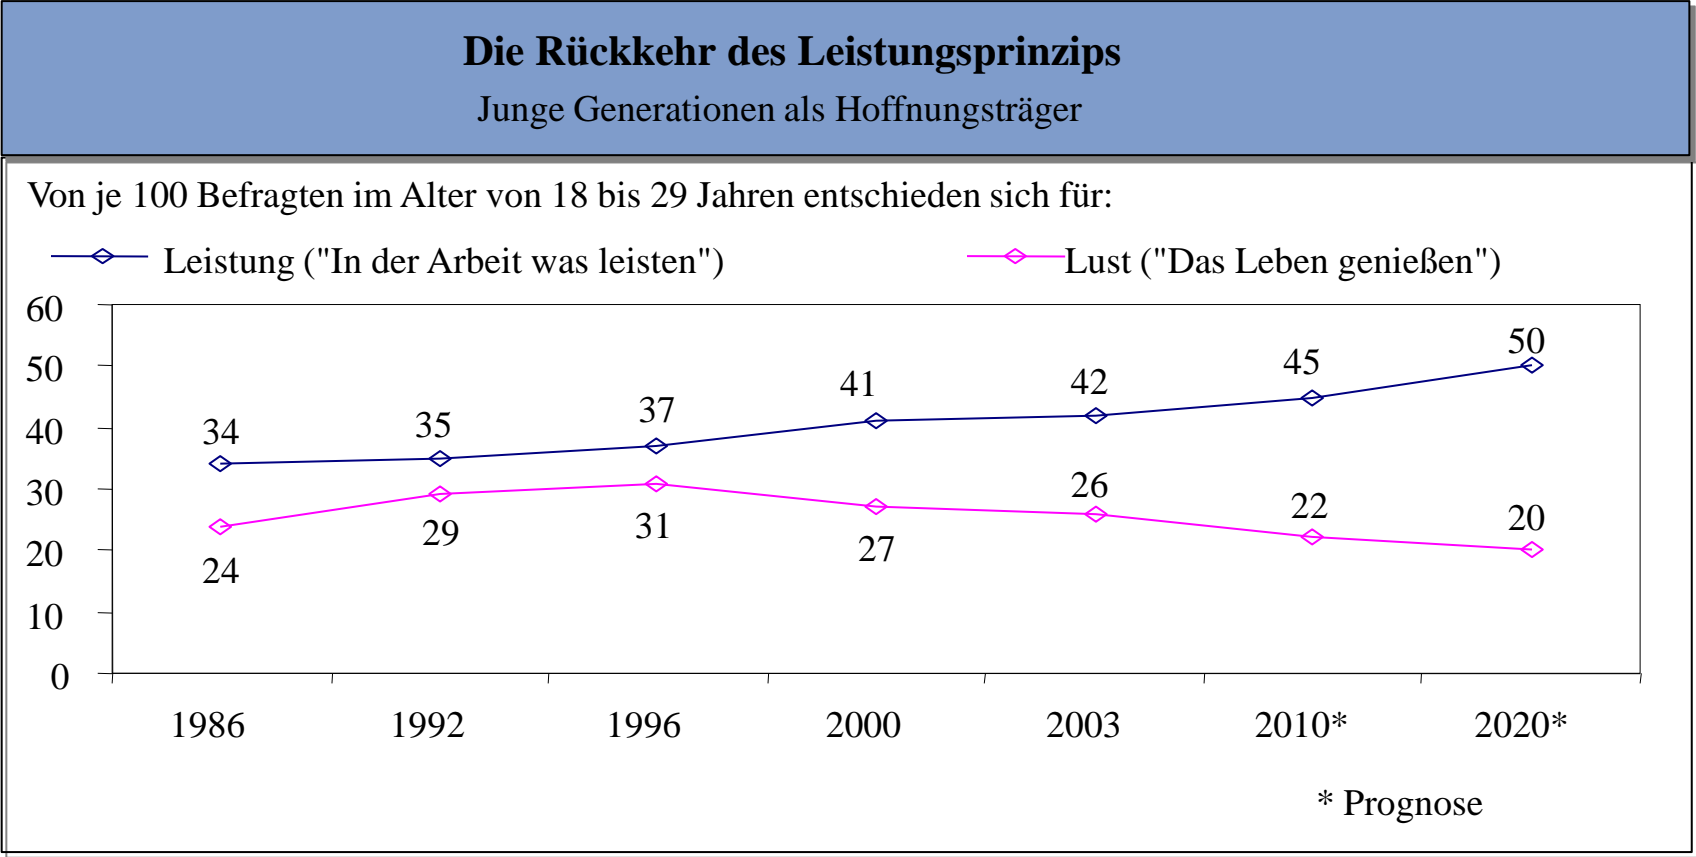

S. 844 Abb. 6  
(in Anlehnung an: Opaschowski, H. W.: Deutschland 2030. Wie wir in Zukunft leben, 2. Aufl., Gütersloh 2009, S. 669)

Jung, Hans: Personalwirtschaft, 9. Aufl., München 2010.

© Oldenbourg Wissenschaftsverlag

## Gegenwärtiger Wertekonflikt

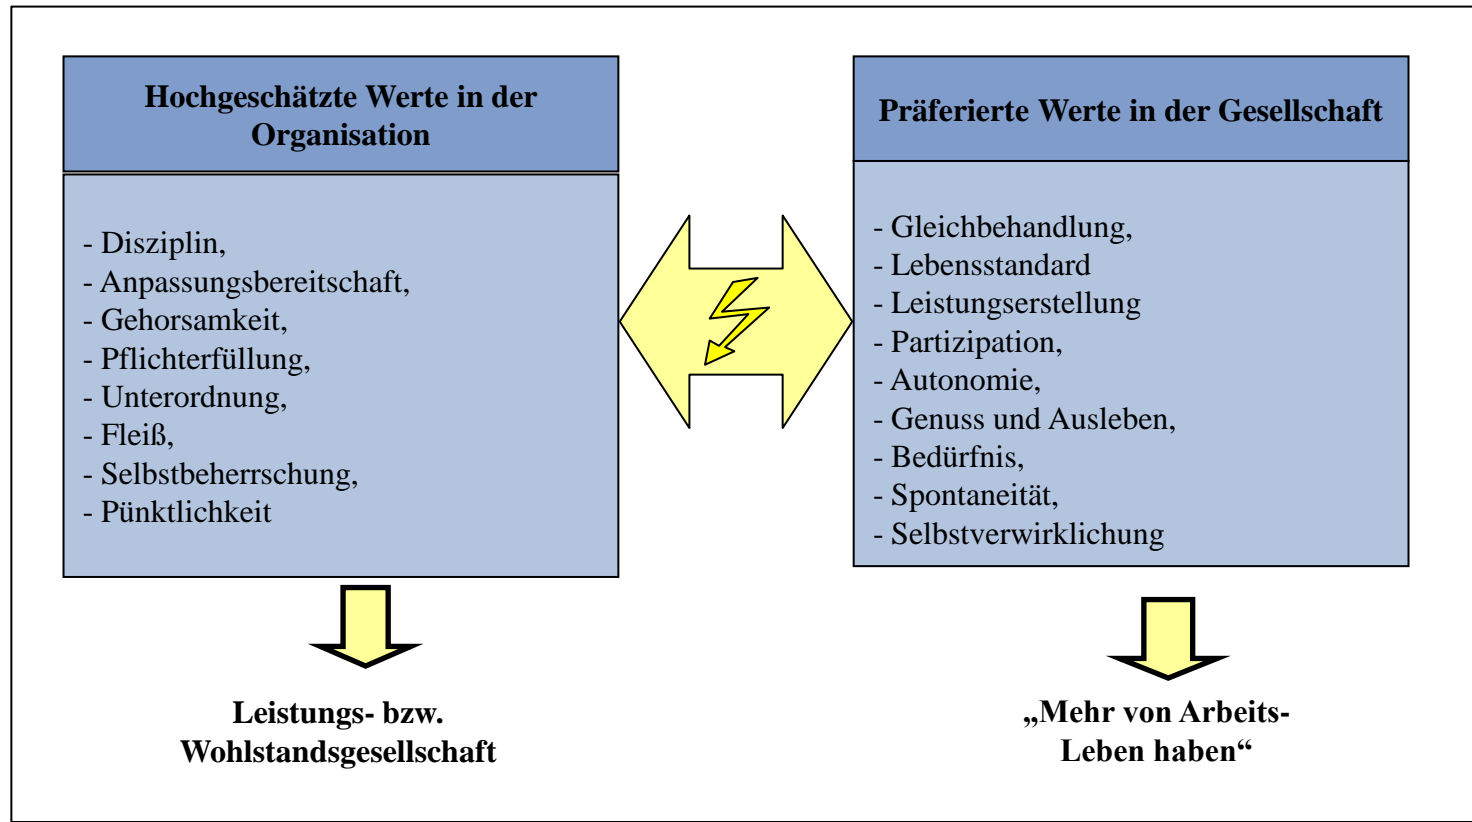

# Der Wandel der persönlichen Präferenzen im Arbeitsleben

| Von je 100 Befragten verstehen unter „beruflicher Karriere“  |      |      |
|--------------------------------------------------------------|------|------|
|                                                              | 1996 | 2008 |
| Meine eigenen beruflichen Vorstellungen verwirklichen können | 60   | 49   |
| Eine Arbeit haben, die Spaß macht                            | 66   | 58   |
| Berufliche Tätigkeiten von hohem Ansehen ausüben             | 28   | 22   |
| Sich in der Arbeit selbst verwirklichen                      | 44   | 39   |
| Überdurchschnittlich viel Geld verdienen                     | 50   | 45   |
| Lange Arbeitszeiten und wenig Freizeit haben                 | 8    | 11   |
| Als Vorgesetzte/r in Führungsposition tätig sein             | 22   | 26   |
| Berufliche Aufstiegschancen haben                            | 49   | 54   |
| Erfolgserlebnisse haben und anerkannt werden                 | 42   | 52   |
| „Nicht davon: Berufliche Karriere interessiert mich nicht“   | 4    | 4    |

S. 846 Abb. 8  
 (in Anlehnung an: Opaschowski, H. W.: Deutschland 2030. Wie wir in Zukunft leben, 2. Aufl., Gütersloh 2009, S. 120)

# „Länger arbeiten - mehr verdienen“

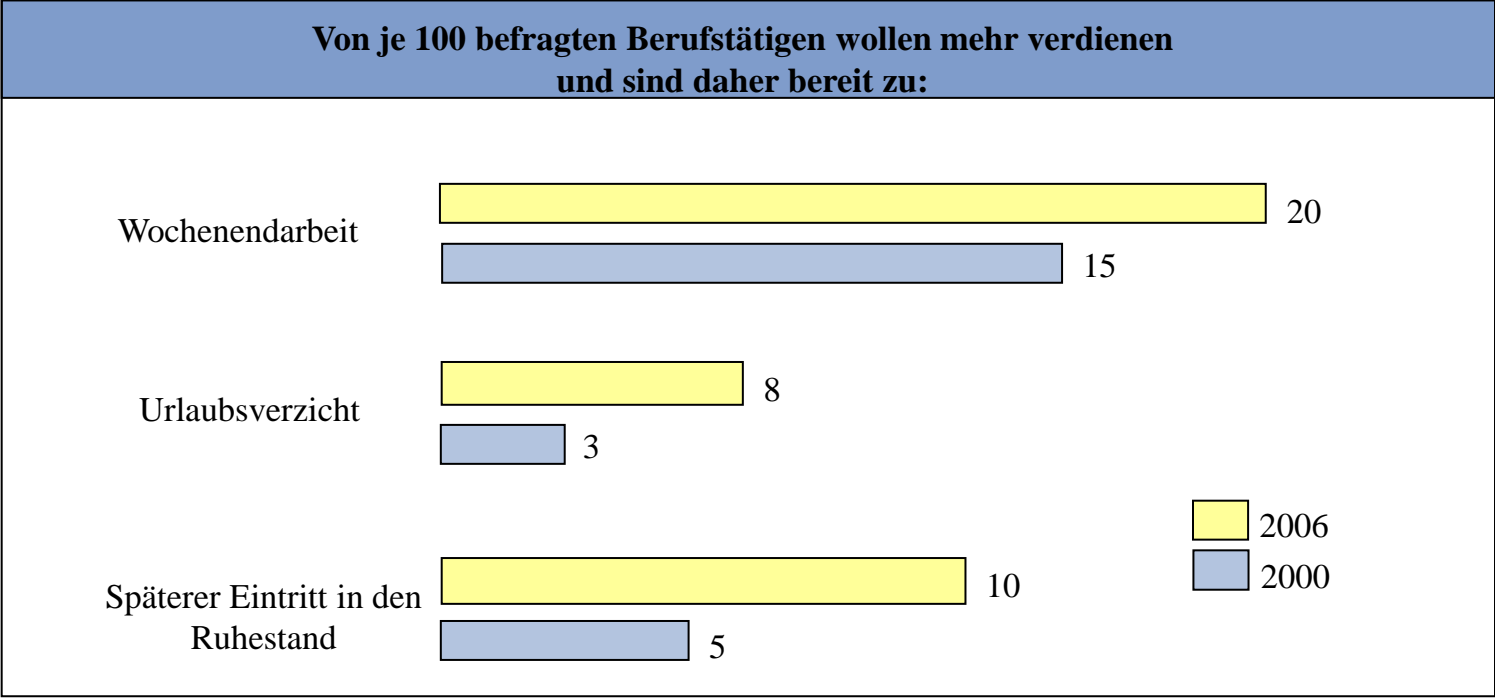

S. 847 Abb. 9  
(in Anlehnung an: Opaschowski, H. W.: Deutschland 2020. Wie wir morgen leben, 2.Aufl., Gütersloh 2009, S. 103)

## Faktoren der Leistungsmotivation und Arbeitszufriedenheit aus heutiger Sicht:

→ **Spaß** fördert die Motivation

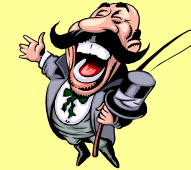

→ **Geld** fördert den Fleiß

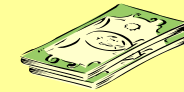

→ **Sinn** fördert die Identifikation

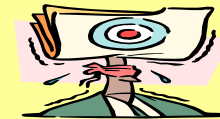

→ **Zeit** fördert die Zufriedenheit

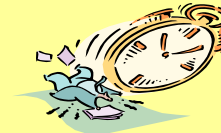

→ **Status** fördert das Erfolgserleben

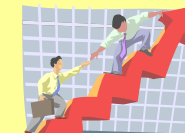

# Indikatoren der beruflichen Mobilität im 21. Jahrhundert

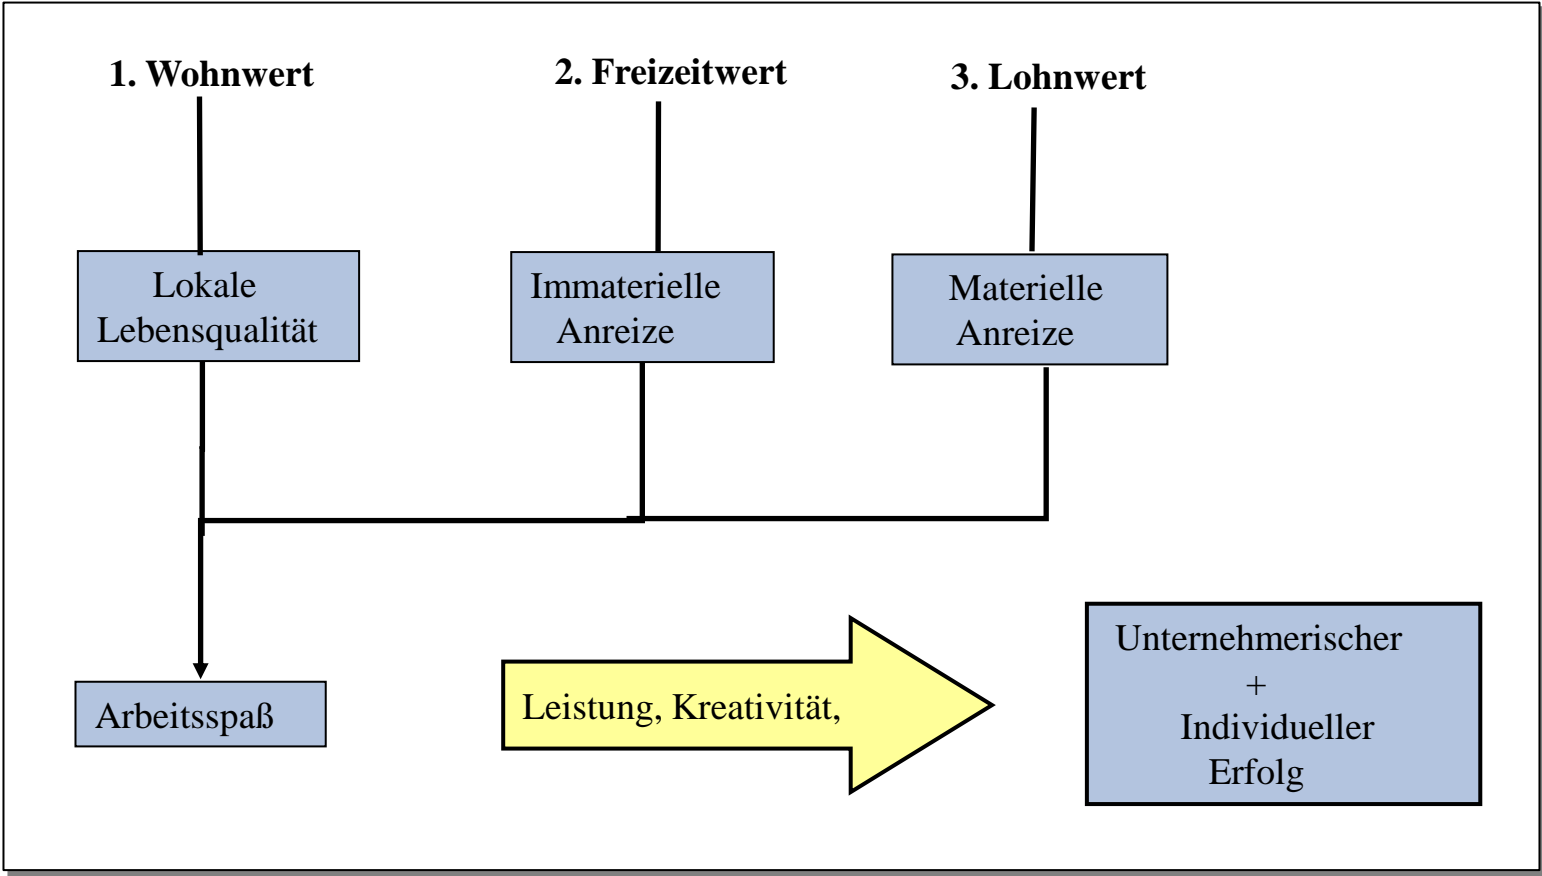



# Arbeitsphänomene des 21. Jahrhundert

| Work-Life- Balance<br>Zielsetzung des Unternehmens                                                                                                    |                                                                                                                                                                                                                                                                                                                                                                                |                                                                                                                                                                                             |
|-------------------------------------------------------------------------------------------------------------------------------------------------------|--------------------------------------------------------------------------------------------------------------------------------------------------------------------------------------------------------------------------------------------------------------------------------------------------------------------------------------------------------------------------------|---------------------------------------------------------------------------------------------------------------------------------------------------------------------------------------------|
| HARMONISIERUNG:                                                                                                                                       |                                                                                                                                                                                                                                                                                                                                                                                |                                                                                                                                                                                             |
|                                                                                                                                                       | Lebensaufgabe<br>Karriere/Leistung                                                                                                                                                                                                                                                                                                                                             | Lebensgenuss<br>Familie/Freizeit                                                                                                                                                            |
| <b>Working Poor Class</b>                                                                                                                             | <b>Mc Jobber</b>                                                                                                                                                                                                                                                                                                                                                               | <b>Jobnomaden</b>                                                                                                                                                                           |
| <p>Dominanz der Teilzeitarbeit und Stellenabbau implizieren geringeres Einkommen</p> <p><b>Folge:</b><br/>Zunehmende materielle und soziale Armut</p> | <p>Neue Arbeitsformel: 0,5*2*3<br/>Die Hälfte der Mitarbeiter verdient doppelt soviel und muss dafür dreimal so viel leisten.</p> <p><b>Folge:</b><br/>Nebenberufsgesellschaft:</p> <ul style="list-style-type: none"> <li>- Selbstversorgungswirtschaft</li> <li>- Grauarbeit</li> <li>- Schwarzarbeit</li> </ul> <p>Gibt Halt, soziale Anerkennung und Selbstbestätigung</p> | <p>Brüchige Berufsbiografien:<br/>Jeder 5. Arbeitnehmer wechselt innerhalb von 5 Jahren den Job.</p> <p><b>Folge:</b><br/>Arbeitnehmer ziehen dem Job nach.<br/>Qualitätsverlust im Job</p> |

S. 850 Abb. 10

## Einflussfaktoren auf Arbeitsangebot

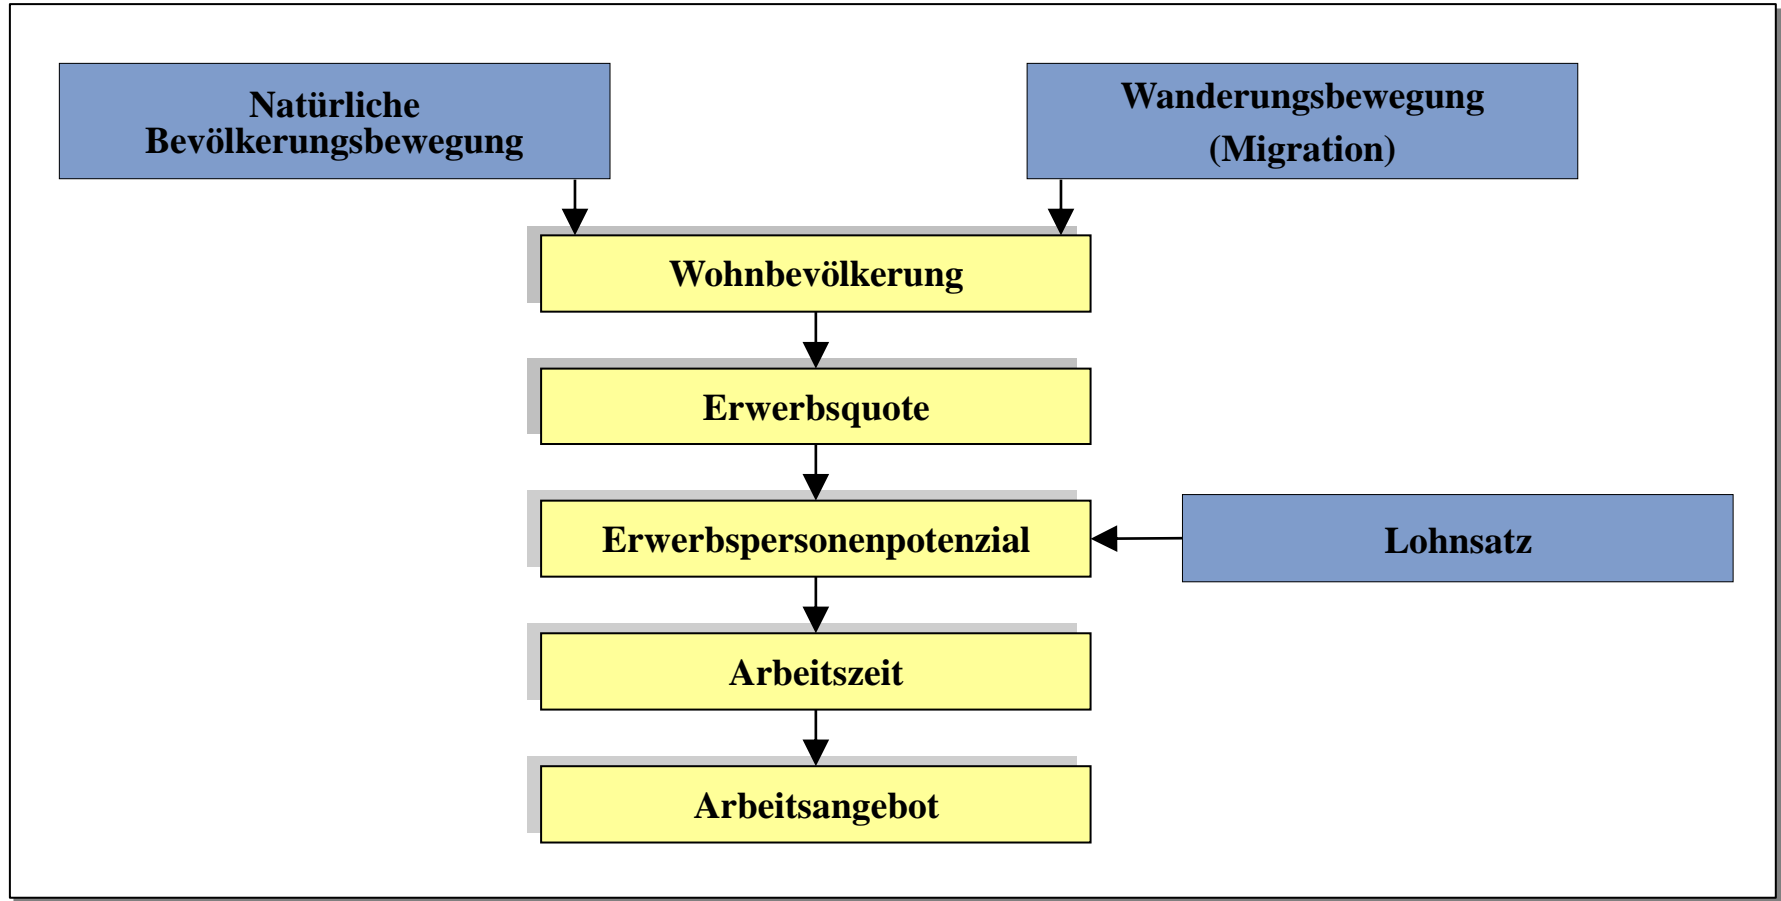

S. 852 Abb. 11

# Nachwuchssituation in der Europäischen Union (in %)

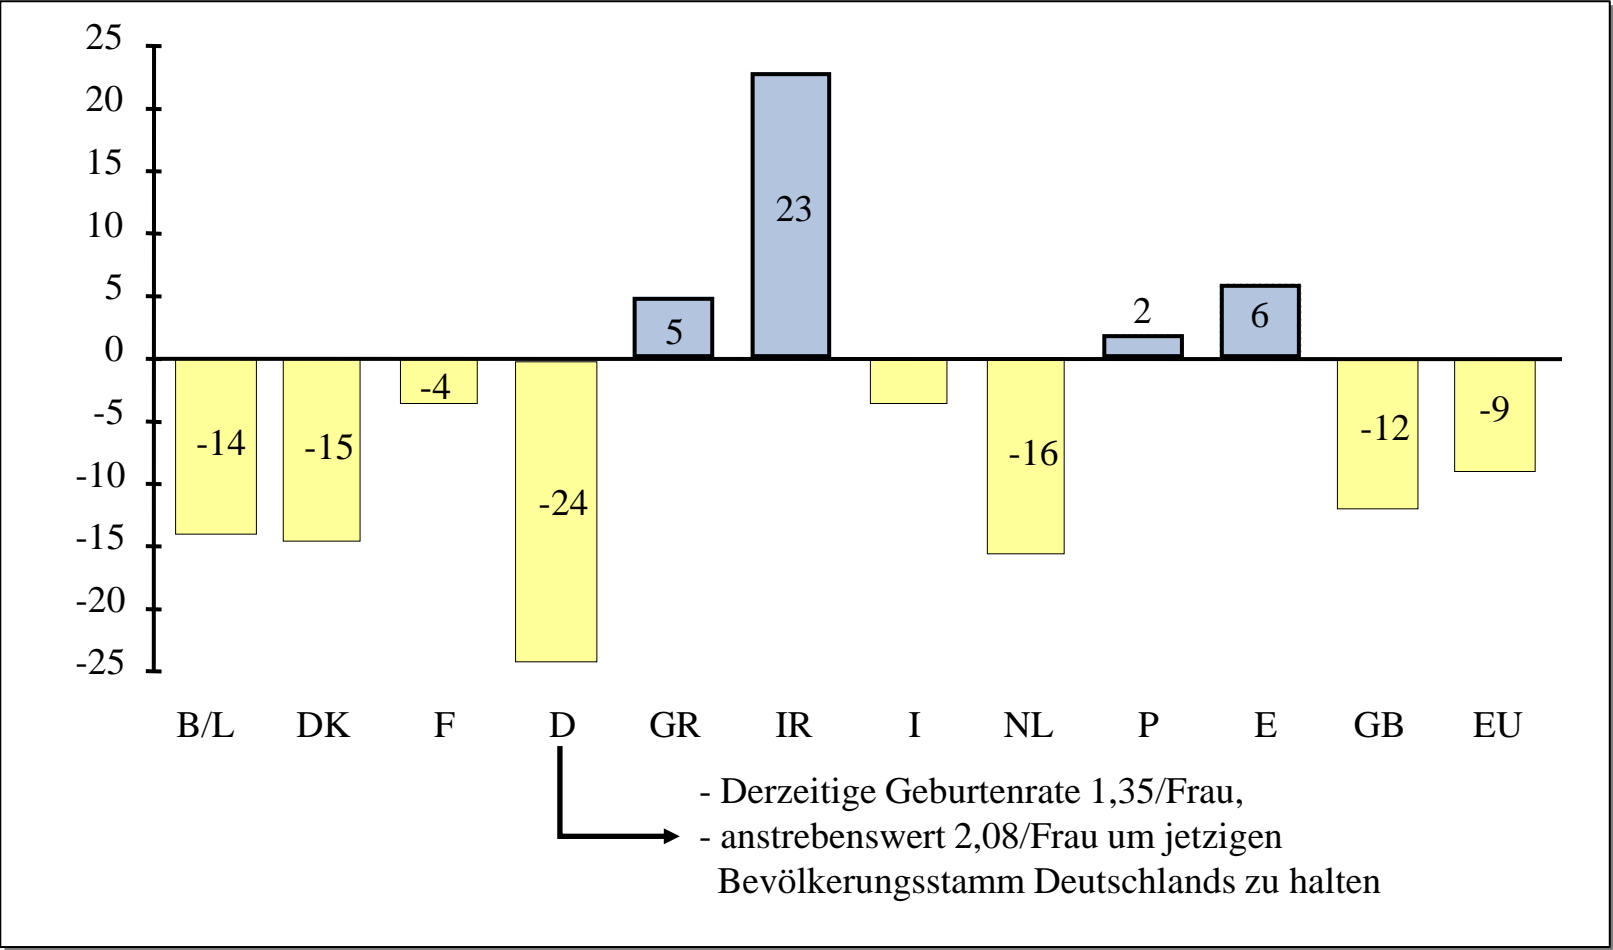

## Wirtschaftssektoren

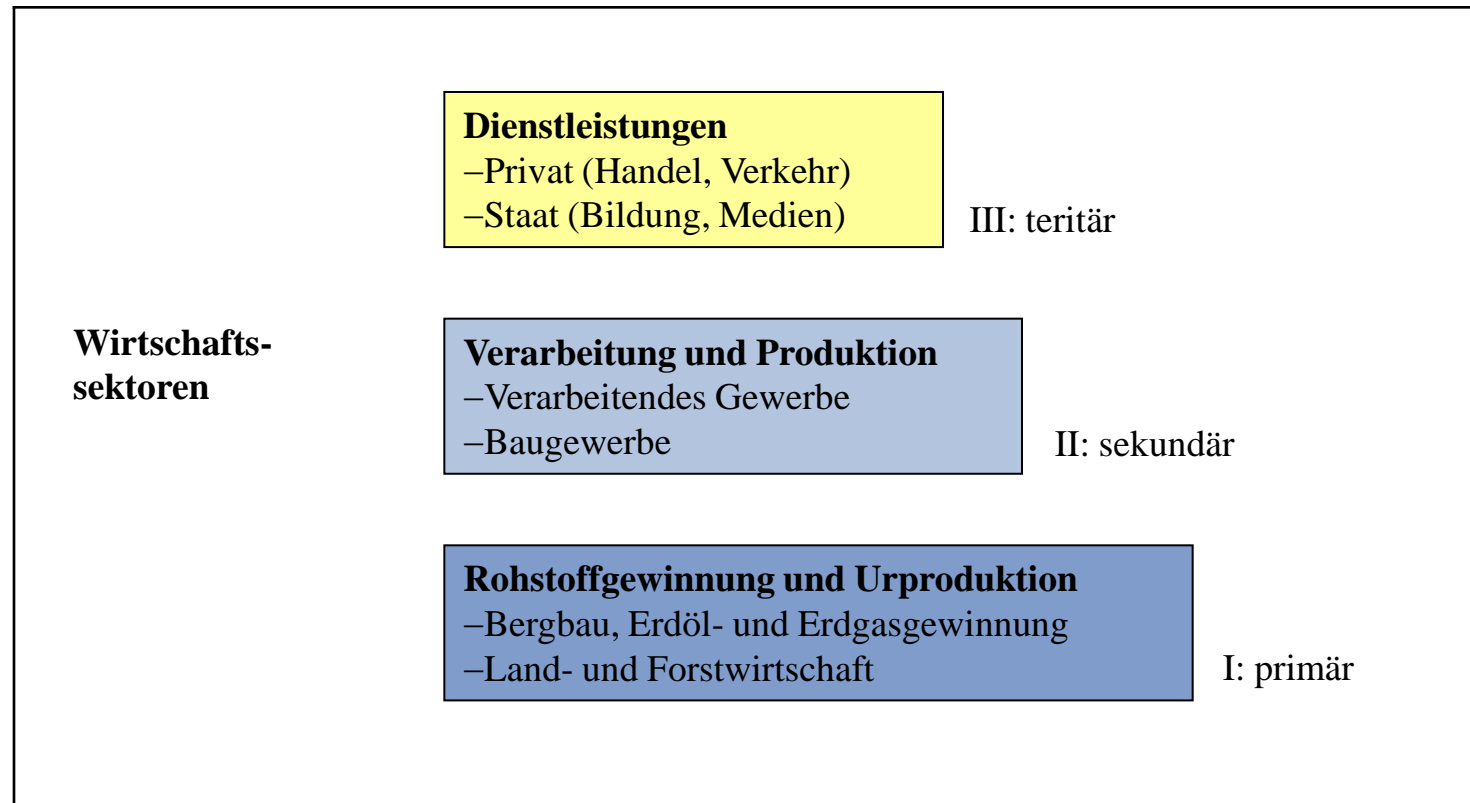

# Erwerbstätige nach Wirtschaftssectoren

| Erwerbstätige nach Wirtschaftssectoren in % |      |      |      |      |      |      |      |      |
|---------------------------------------------|------|------|------|------|------|------|------|------|
| Sektoren                                    | 1991 | 2003 | 2004 | 2005 | 2006 | 2007 | 2008 | 2009 |
| Land- u. Forstwirtschaft, Fleischerei       | 3,9  | 2,3  | 2,2  | 2,2  | 2,1  | 2,1  | 2,1  | 2,1  |
| Produzierendes Gewerbe                      | 29,3 | 21,0 | 20,6 | 20,3 | 20,0 | 19,9 | 19,9 | 19,4 |
| Baugewerbe                                  | 7,3  | 6,0  | 5,8  | 5,6  | 5,6  | 5,4  | 5,4  | 5,5  |
| Dienstleistungsbereiche                     | 59,5 | 70,7 | 71,3 | 71,9 | 72,4 | 72,4 | 72,5 | 73,0 |

S. 854 Abb. 13

Quelle: Statistisches Bundesamt, Pressemitteilung, 04.01.2010

Jung, Hans: Personalwirtschaft, 9. Aufl., München 2010.

© Oldenbourg Wissenschaftsverlag

# Erwerbstätige nach Wirtschaftsbereichen

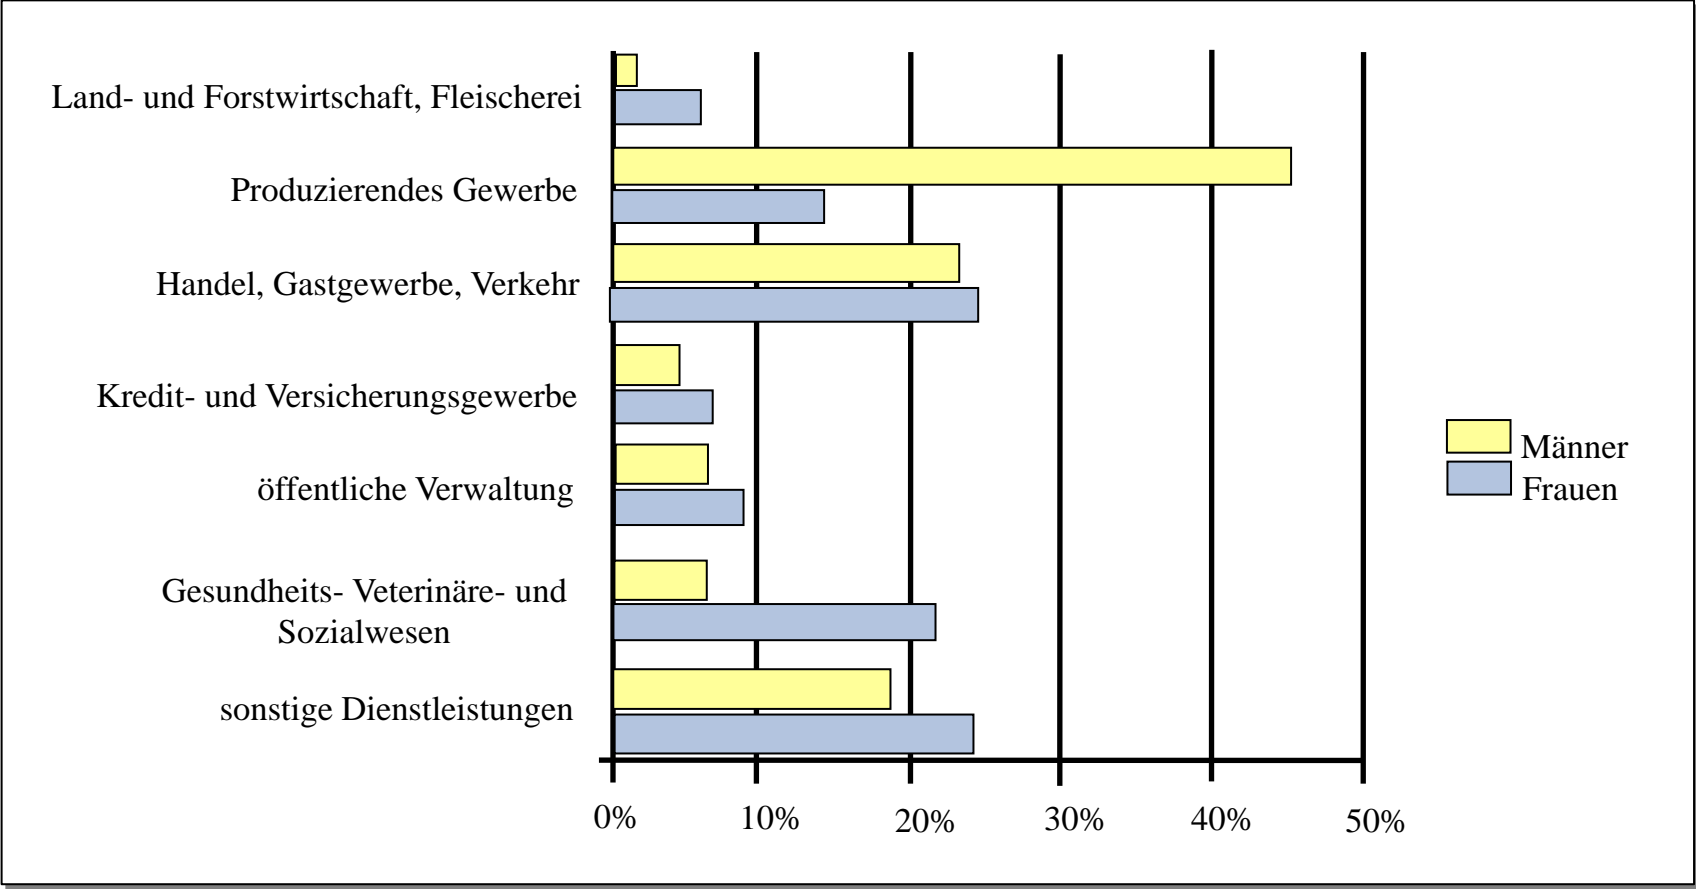

S. 855 Abb. 14  
Quelle: Zu den Angaben vgl. Statistisches Bundesamt, Statistisches Jahrbuch 2009

# Erwerbstätige des Dienstleistungssektors 2009

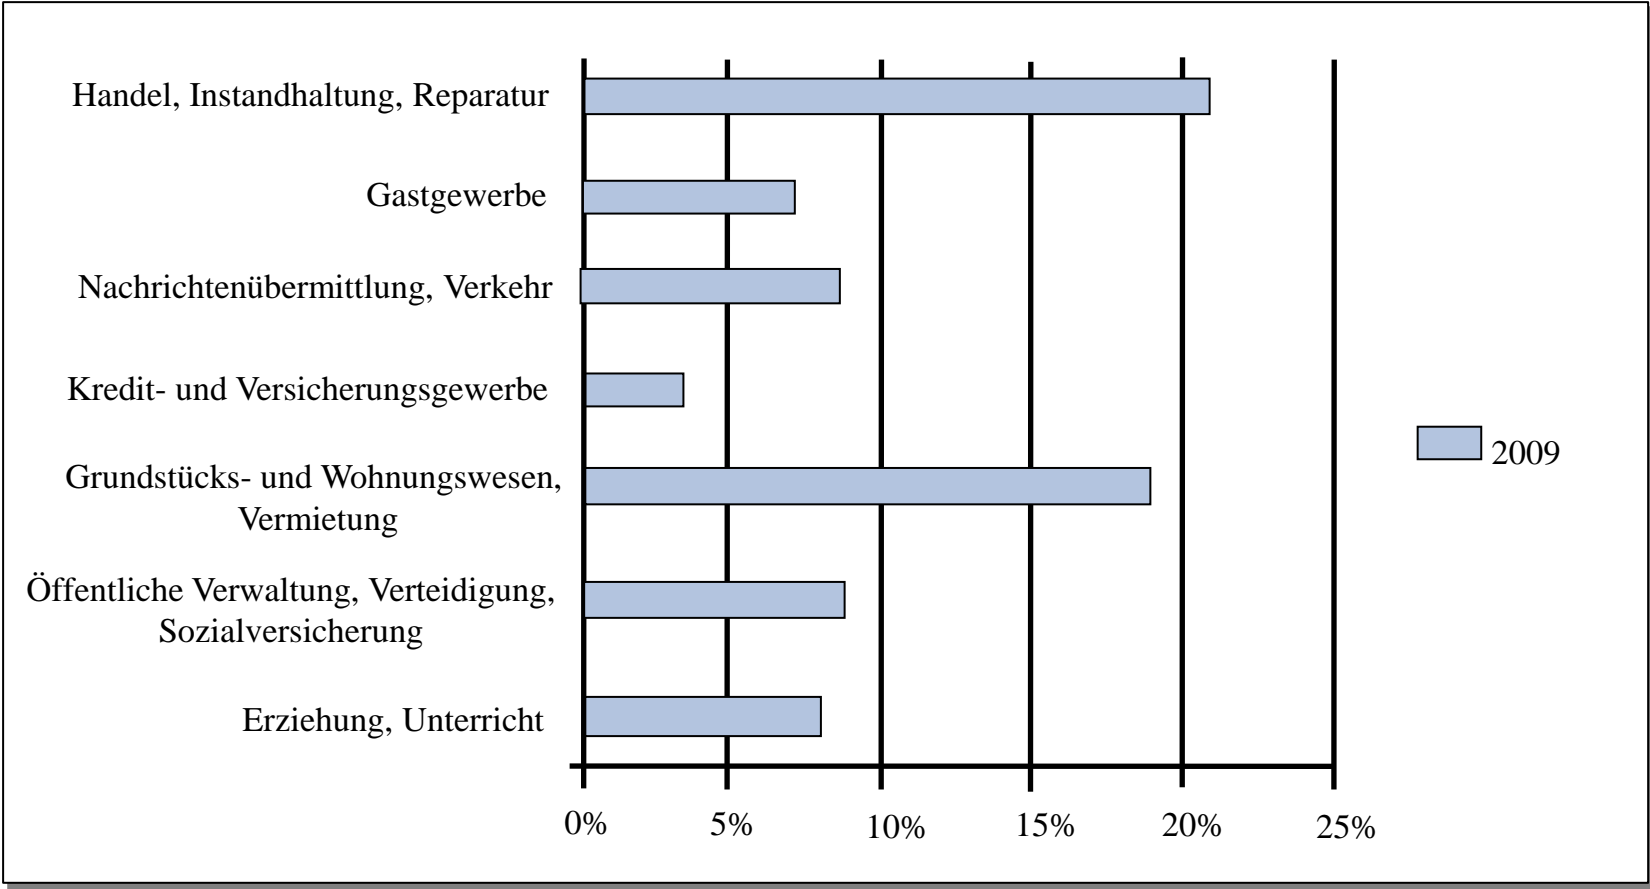

S. 856 Abb. 15  
 Quelle: Statistisches Bundesamt, Statistisches Jahrbuch 2009

# Entwicklung der Tätigkeitsstrukturen

| Erwerbstätige nach Tätigkeitsbereichen in % |       |       |
|---------------------------------------------|-------|-------|
| Tätigkeitsbereich                           | 1995  | 2010  |
| Produktionstätigkeit                        | 30,0  | 23,8  |
| Primäre Dienstleistungen                    | 43,7  | 44,5  |
| Sekundäre Dienstleistungen                  | 26,4  | 31,6  |
| Insgesamt                                   | 100,0 | 100,0 |

S. 857 Abb. 16



# Qualitative Entwicklung der Individuen

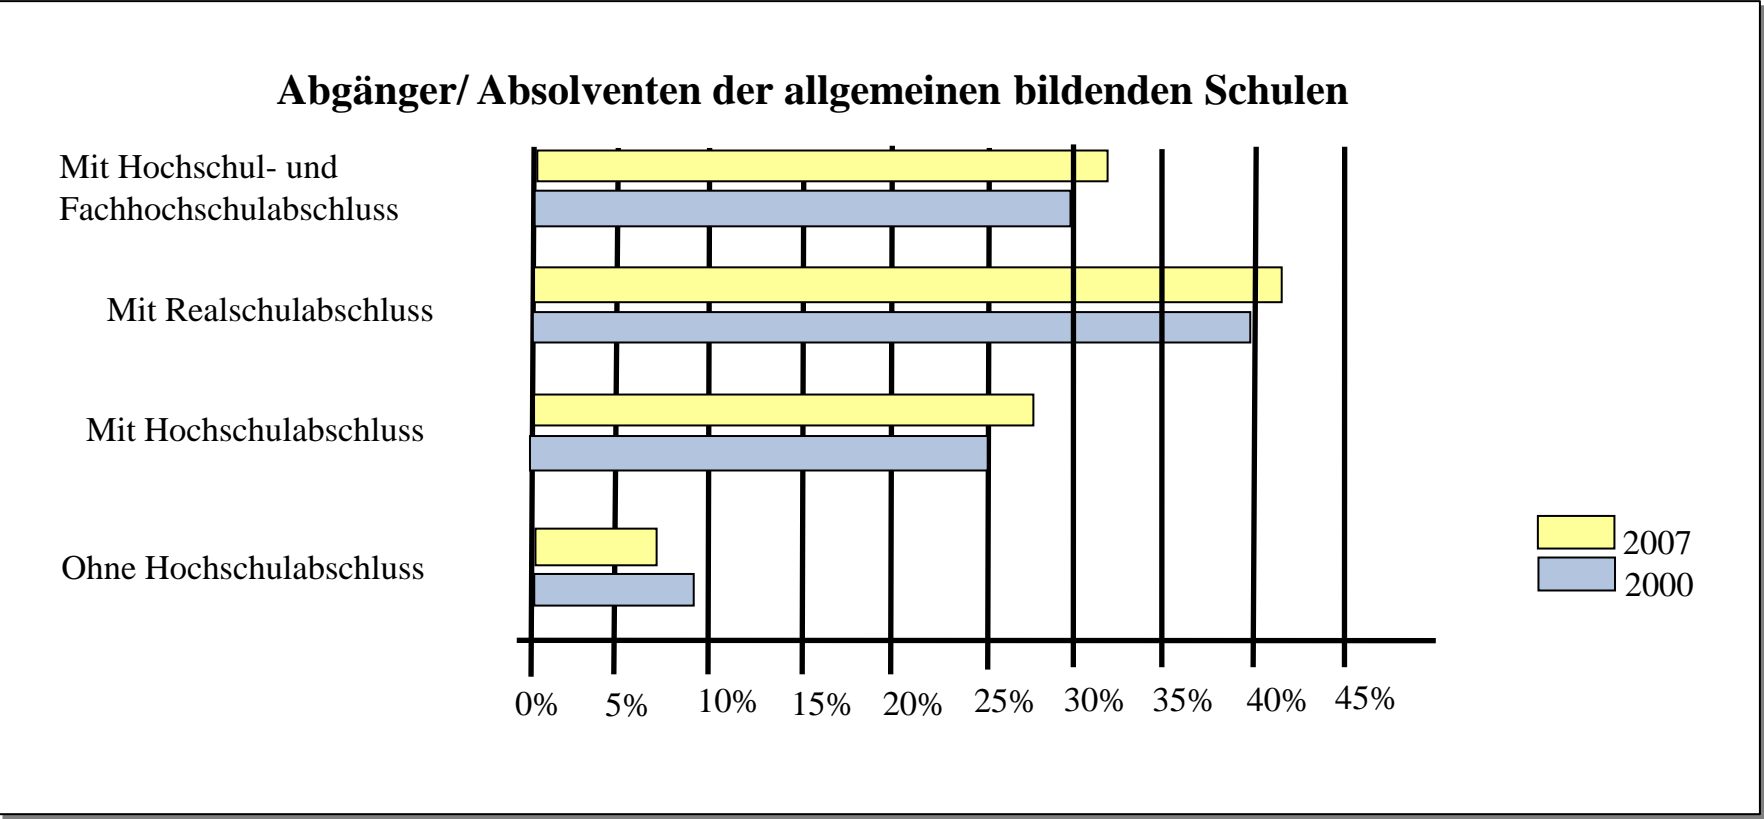

# Studienanfänger nach Fächergruppen

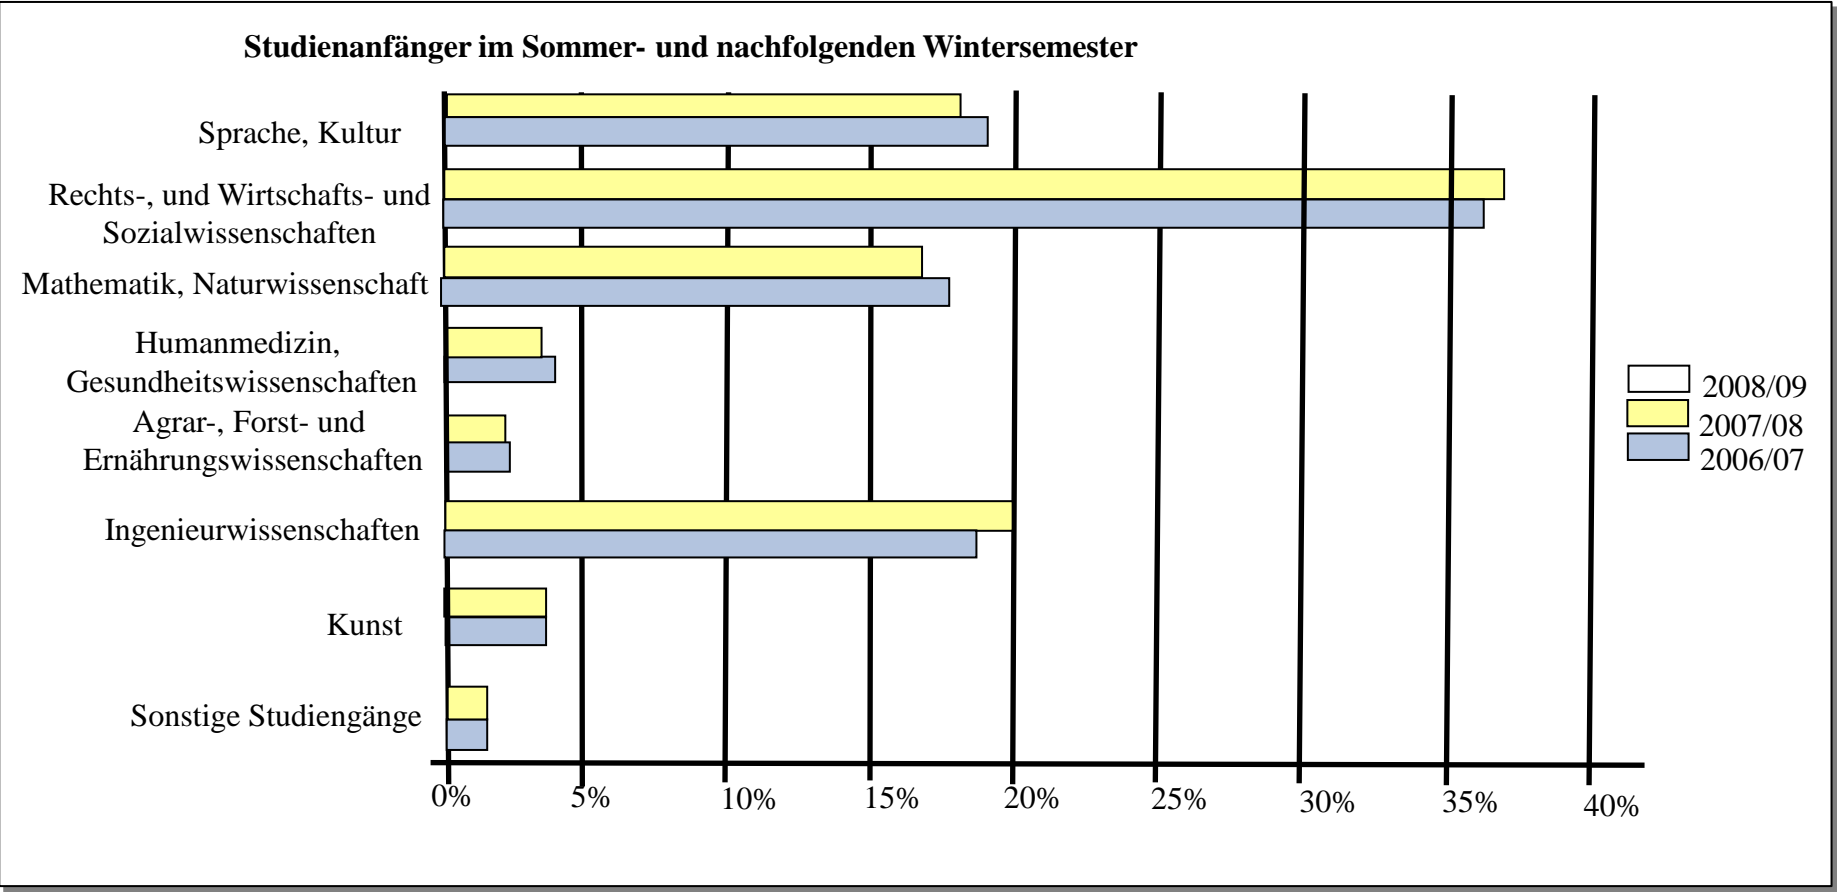

S. 859 Abb. 18

Quelle: Statistisches Bundesamt, Studienanfänger, 2009

Jung, Hans: Personalwirtschaft, 9. Aufl., München 2010.

© Oldenbourg Wissenschaftsverlag

# Erwerbstätige nach Vollzeit und Teilbeschäftigung

| Erwerbstätige nach Vollzeit- und Teilzeitbeschäftigung |               |            |           |
|--------------------------------------------------------|---------------|------------|-----------|
|                                                        | Erwerbstätige | Vollzeit   | Teilzeit  |
| Deutschland                                            | 38.734.000    | 28.753.000 | 9.981.000 |
| West                                                   | 31.102.000    | 22.810.000 | 8.292.000 |
| Männer                                                 | 17.109.000    | 15.589.000 | 1.520.000 |
| Frauen                                                 | 13.993.000    | 7.221.000  | 6.772.000 |
| Ost                                                    | 7.632.000     | 5.943.000  | 1.689.000 |
| Männer                                                 | 4.079.000     | 3.628.000  | 451.000   |
| Frauen                                                 | 3.553.000     | 2.314.000  | 1.238.000 |

S. 862 Abb. 19  
 Quelle: Statistisches Bundesamt, Wirtschaft und Statistik 09/2009

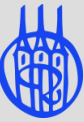

## **Internationalisierung und europäische Integration**

- Auswirkungen des EU-Binnenmarktes
- Besonderheiten europäischer Personalarbeit
- Entwicklung des Multikulturellen Personalmanagements
- Internationalisierung der Mitarbeiter
- Landesspezifische Ausbildung in EU-Mitgliedsstaaten

# Instrumente eines Internationalen Management

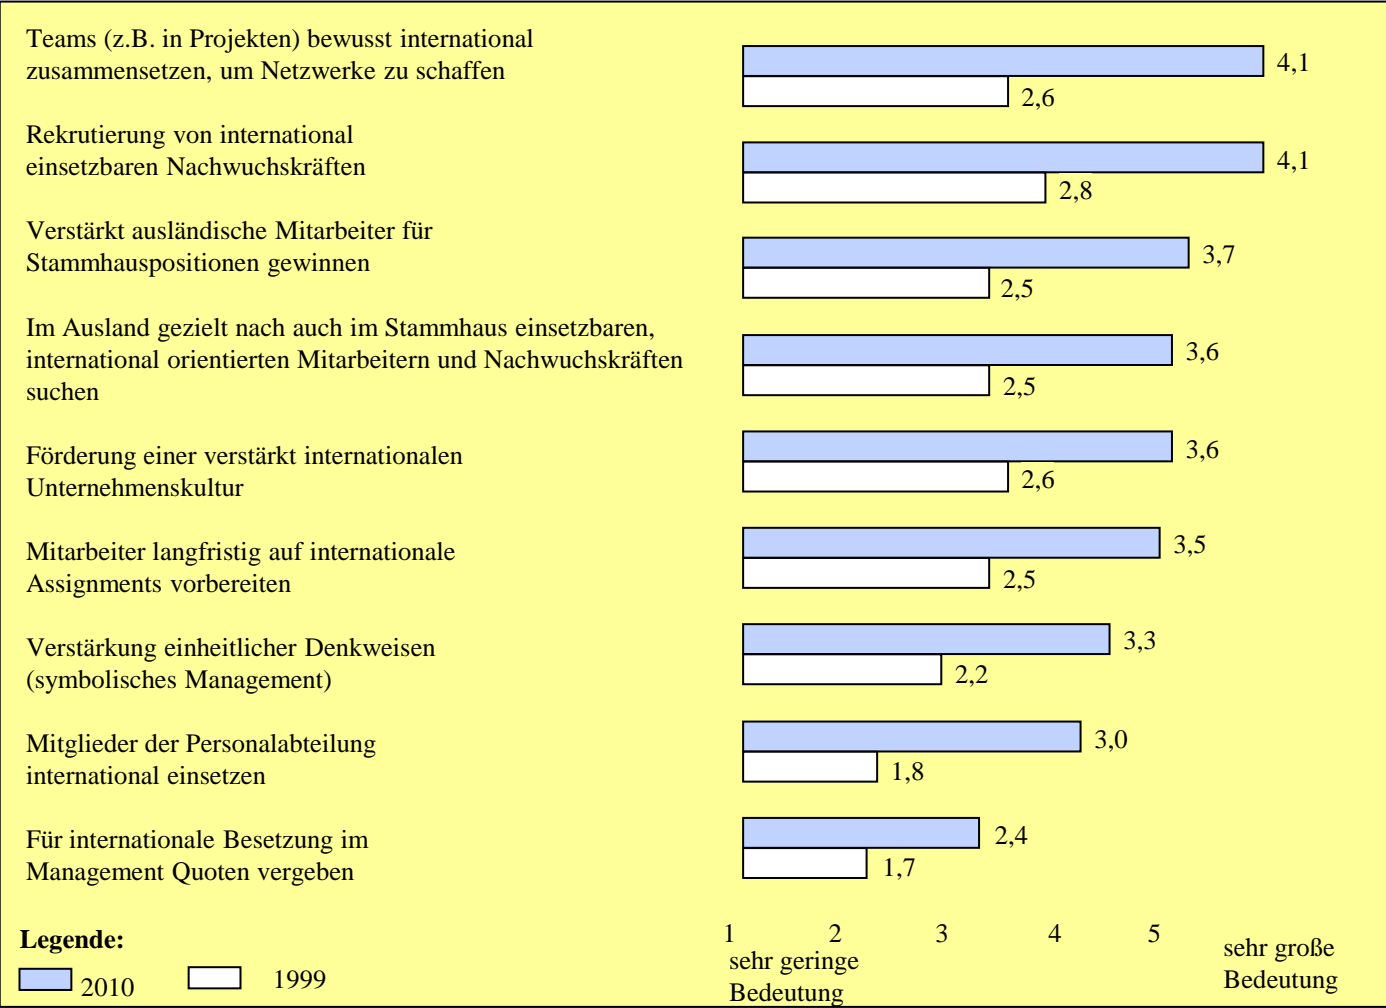

S. 864 Abb. 20

Quelle: Ergebnisse einer empirischen Studie zur Personalstrategie europäischer Unternehmen. Vgl. Wunderer, R./Dick, P.: Personalmanagement – Quo vadis?. Analysen und Prognosen zu Entwicklungstrends bis 2010, Neuwied/Kriftel 2000, S. 103.

## Empirische Studie zur Personalstrategie europäische Unternehmen

### Großbritannien

1. Personalentwicklung 23 %
2. Personalbeschaffung/ Personalerhaltung 18 %
3. Produktivitäts- u. Effizienzsteigerung 11 %

### Frankreich

1. Personalentwicklung 23 %
2. Arbeitgeber- Arbeitnehmerbeziehungen 20 %
3. Personaleinsatzplanung 9 %

### Deutschland

1. Personalentwicklung 28 %
2. Personalbeschaffung/ Personalerhaltung 16 %
3. Arbeitgeber- Arbeitnehmerbeziehungen 12 %

### Schweden

1. Personalentwicklung 28 %
2. Personalbeschaffung/ Personalerhaltung 20 %
3. Personalfunktion/ Personalpolitik 11 %

### Spanien

1. Personalentwicklung 28 %
2. Arbeitnehmer- Arbeitgeberbeziehungen 15 %
3. Änderungen Personalstruktur 9 %

## **Entwicklung des multikulturellen Personalmanagements**

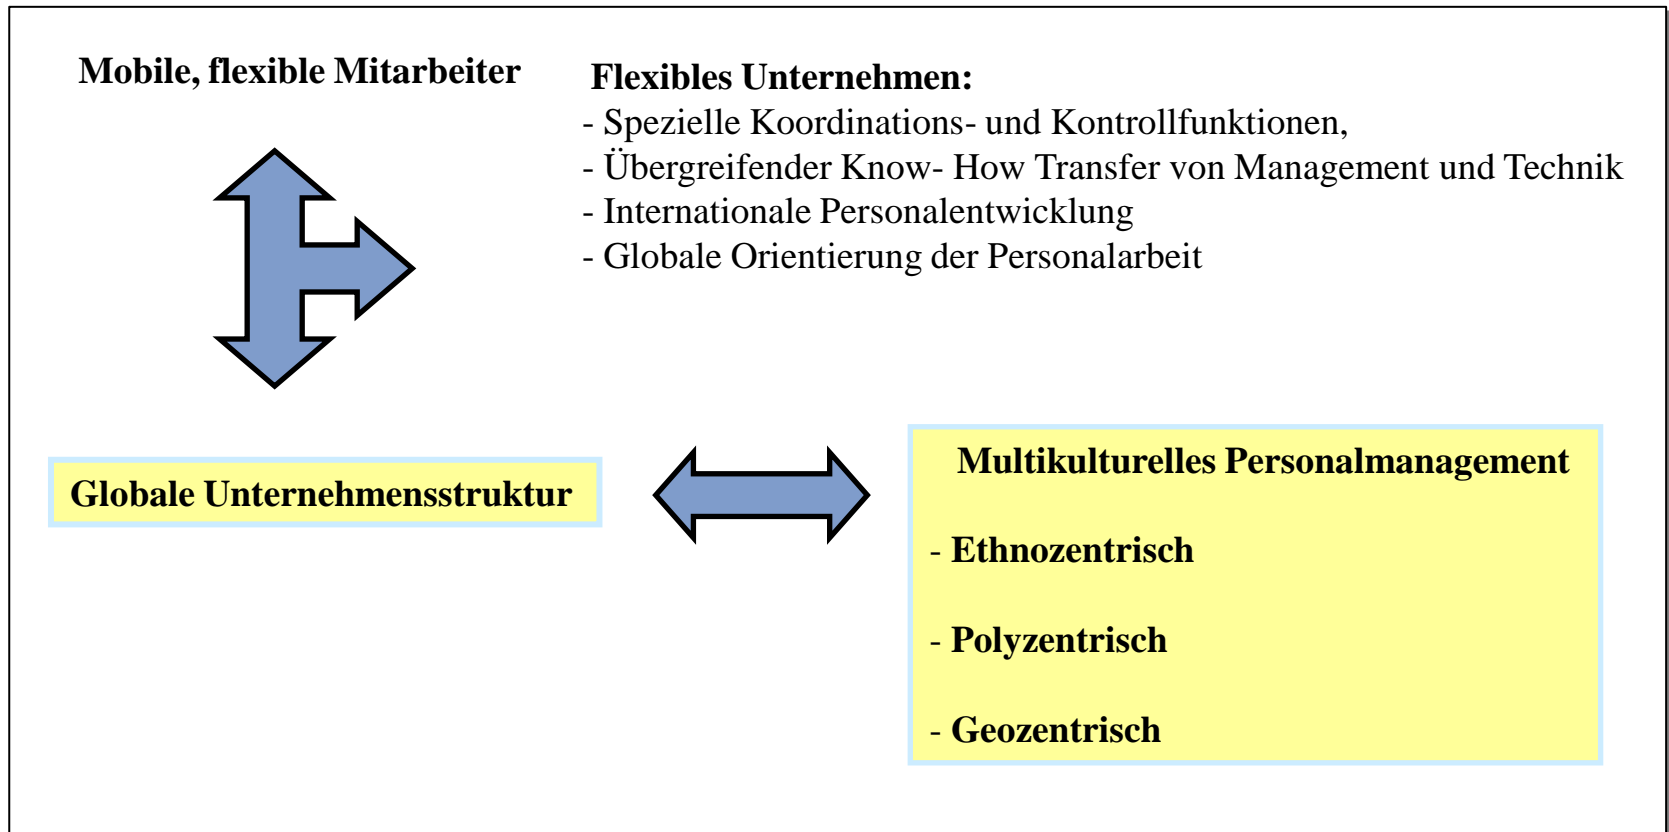

## Unterschiedliche Strategiewahlen

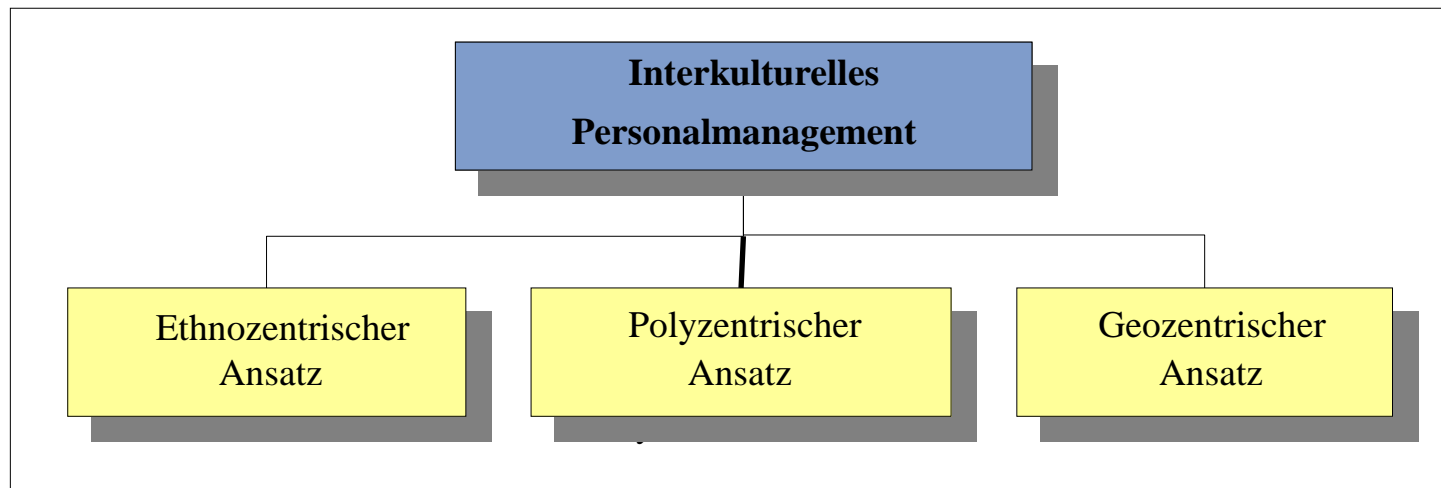



# Entstandene Führungskraft im Spannungsfeld

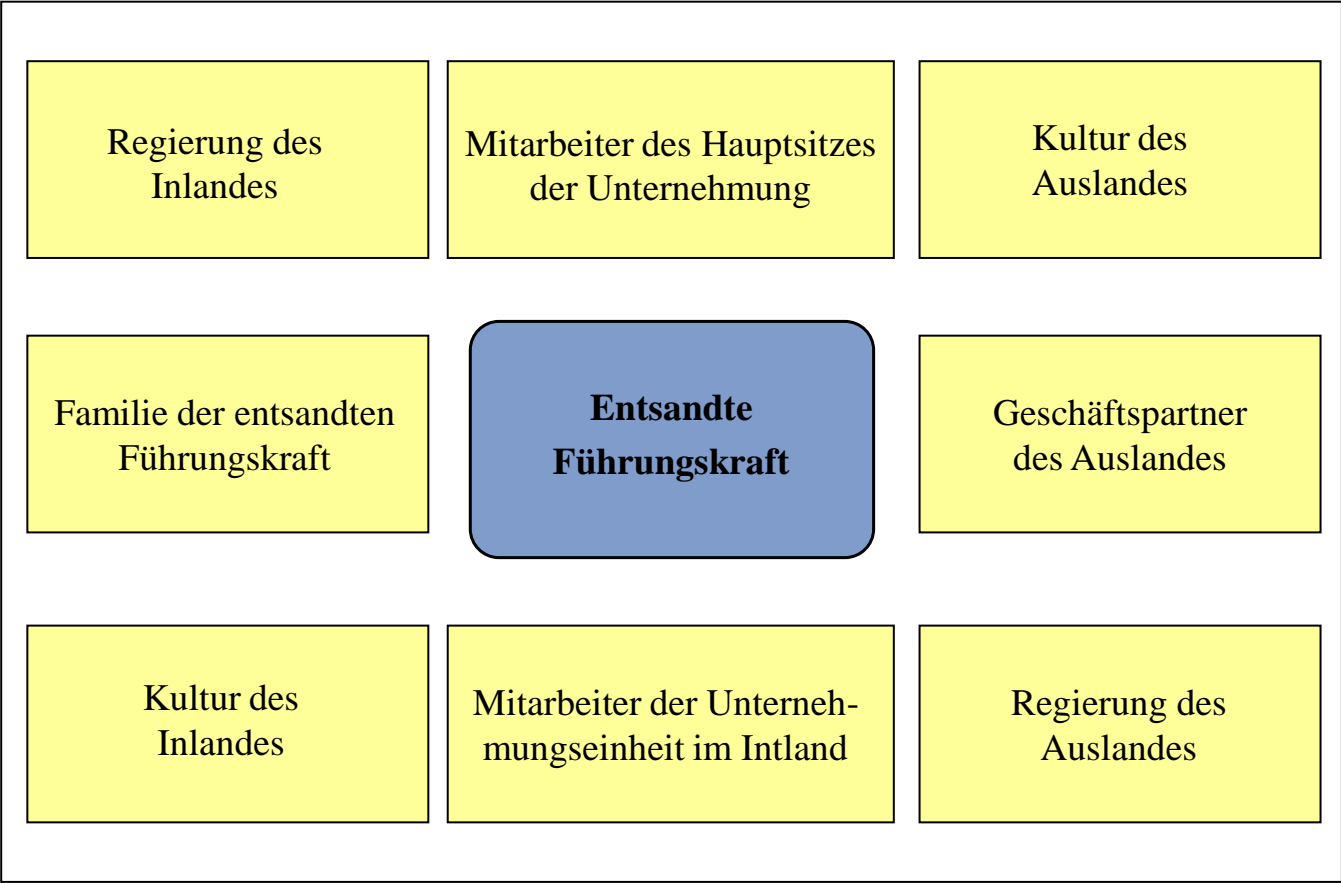

S. 867 Abb. 22

# Klassifikation internationaler Managemententwicklungsstrategie

| Merkmale                                        | ethnozentrisch                             | polyzentrisch                             | geozentrisch                                              |
|-------------------------------------------------|--------------------------------------------|-------------------------------------------|-----------------------------------------------------------|
| Unternehmenskultur                              | Ausschließlich national orientiert         | Dominanz der Subkultur                    | international orientiert                                  |
| Soziokulturelle Anpassung                       | Universalismustheorie, keine Anpassung     | Dezentralisation gegens. Anpassung        | Betonung der Gemeinsamkeit                                |
| Führung der Auslandsniederlassungen             | durch Entsandte aus der Zentrale           | durch einheimische Manager                | durch Entsandte, Einheimische oder aus Drittländern       |
| Führung der Zentrale mit ausländischen Managern | nicht üblich                               | nicht üblich                              | erwünscht                                                 |
| Entsendungsquote                                | hoch                                       | niedrig                                   | sehr hoch                                                 |
| Entsendungsrichtung                             | Einbahnstraße von der Zentrale ins Ausland | Einbahnstraße vom Ausland in die Zentrale | Beide Richtungen von und zwischen Auslandsniederlassungen |

S. 869 Abb. 23  
(in Anlehnung an: Pfohl, H. C./Bock, I./Dubbert, M. C.: Internationalisierung der Managemententwicklung. in: Eurostrategisches Personalmanagement, Bd. 1, Hrsg. von Marr, R., München/Mering 1991, S. 99)

# Maßnahmen zur Reintegration entsandter Mitarbeiter

| Prozessphasen          | Maßnahmen zur Reintegration entsandeter Mitarbeiter                                                                                                                                                                                                                                        |
|------------------------|--------------------------------------------------------------------------------------------------------------------------------------------------------------------------------------------------------------------------------------------------------------------------------------------|
| Vor der Integration    | <ul style="list-style-type: none"> <li>• Bestimmung eines Paten im Stammhaus</li> <li>• Wiedereingliederungsgarantie</li> </ul>                                                                                                                                                            |
| Während der Entsendung | <ul style="list-style-type: none"> <li>• Betreuung durch den Paten</li> <li>• Informationen aus dem Mutterhaus</li> <li>• Laufbahnplanung</li> <li>• Personalentwicklungsmaßnahmen und Konsultationen mit dem Mutterkonzern</li> <li>• Rechtzeitige Wiedereingliederungsplanung</li> </ul> |
| Bei der Rückkehr       | <ul style="list-style-type: none"> <li>• Ausgleich lokal bedingter fachlicher Defizite</li> <li>• Seminar/Workshop zum Auslandseinsatz mit Familieneinschluss</li> <li>• Analyse fachlicher und gesellschaftlicher Erfahrungen durch Personal- und Fachabteilungen</li> </ul>              |

## Internationalisierung der Mitarbeiter

- **Segmentierung des Arbeitsmarkts:**
  - » Welchen Typ von Bewerber suchen wir?
  - » Welche Bedürfnisse hat er? Können wir auf die Bedürfnisse eingehen?
- **Auswahl der Maßnahmen:**
  - » Bekannte Rekrutierungsquellen wie INSEAD, ESB, St. Gallen, Rotterdam
  - » Weniger bekannte Hochschulen richten sich international aus, lohnend ist Partnerschaften mit ihnen einzugehen
- **Festlegung der Bewerberquellen:**
  - » Welche Maßnahmen unterstützen die Partnerschaft ?
  - » Beispielhaft Förderpreise, Stipendien, Fachvorträge, Anzeigen in hochschuleigenen Publikationen, Mitarbeit in Hochschulgremien, Vergabe von Diplomarbeiten und Dissertationen.

# Internationale Personalmarketingmaßnahmen

| Maßnahme            | Kosten         | Wirkung der<br>Ansprache | Wirkung der<br>Probebeziehung |
|---------------------|----------------|--------------------------|-------------------------------|
| 1. Stipendien       | hoch           | mittel                   | niedrig                       |
| 2. Förderpreise     | mittel         | mittel                   | niedrig                       |
| 3. Praktika         | mittel         | hoch                     | hoch                          |
| 4. Diplomarbeiten   | mittel         | hoch                     | mittel                        |
| 5. Firmenpräsent    | niedrig        | mittel/hoch              | niedrig                       |
| 6. Fachvorträge     | niedrig        | mittel/hoch              | niedrig                       |
| 7. Messen           | mittel         | niedrig/mittel           | niedrig                       |
| 8. Anzeigen         | niedrig        | mittel                   | niedrig                       |
| 9. Gremientätigkeit | niedrig/mittel | niedrig                  | niedrig                       |
| 10. Studienprojekte | niedrig        | mittel/hoch              | mittel                        |
| 11. Schenkungen     | niedrig-hoch   | niedrig/mittel           | niedrig                       |

S. 871 Abb. 24  
 (in Anlehnung an: Walsh, J./Papmehl, A.: Internationales Personalmarketing. in: Personalentwicklung im Wandel, Hrsg. von Papmehl, A./Walsh, J., Wiesbaden 1991, S. 305 ff.)

## DIVERSITY- Unternehmensstärke der Zukunft

### **Diversity = Vielfalt**

Ist Brennpunkt einer neuen Unternehmenskultur und etabliert Strukturen in Unternehmen, die

**ethnische, soziale und kulturelle Verschiedenheiten**

zum Ursprung von Innovationen und Inspirationen werden lassen.

# DIVERSITY- Unternehmensstärke der Zukunft

| DIVERSITY- in der FORD Werke AG                                                                                                                                                                                                                                                      |  | Diversity- Projekte:                                                                                                                                                                                                                                                                                                                                                                                                                                                                                                                                                                                        |
|--------------------------------------------------------------------------------------------------------------------------------------------------------------------------------------------------------------------------------------------------------------------------------------|--|-------------------------------------------------------------------------------------------------------------------------------------------------------------------------------------------------------------------------------------------------------------------------------------------------------------------------------------------------------------------------------------------------------------------------------------------------------------------------------------------------------------------------------------------------------------------------------------------------------------|
| <ul style="list-style-type: none"> <li>Beschäftigte aus 57 Nationen</li> <li>1996 Gründung des „<b>Diversity Council</b>“ Ford Deutschland</li> <li>35 Mitglieder aus allen Unternehmensbereichen und Unternehmensebenen</li> <li>Einsatz eines <b>Diversity Managers</b></li> </ul> |  | <ul style="list-style-type: none"> <li><b>Ford Pänz:</b> KITA für den Bedarfsfall</li> <li><b>WEP- Women`s Engineering Panel:</b> <ul style="list-style-type: none"> <li>Gründung 1995 durch Ingenieurinnen – <u>Ziel:</u> Steigerung des Frauenanteils in technischen Berufen</li> </ul> </li> <li><b>Ford- FIT- Programm:</b> <ul style="list-style-type: none"> <li><u>Ziel:</u> Gewinnung von Schülerinnen für technische Berufe</li> </ul> </li> <li><b>IT- WILL- Women in Leadership:</b> <ul style="list-style-type: none"> <li>Interessenvertretung von Frauen im IT Bereich</li> </ul> </li> </ul> |

## **Technologischer Wandel und Qualifikationsbedarf**

- Erfordernisse bei der Einführung neuer Technologien
- Auswirkungen auf die Beschäftigungslage
- Einfluss neuer Technologien auf das Personalwesen
- Die Notwendigkeit der Qualifizierung



# Superschnelle Innovationen

Beispiel:

| Gesellschaft    | Produkt       | Entwicklungszeit : | Entwicklungszeit: neu |
|-----------------|---------------|--------------------|-----------------------|
| Honda           | Personenwagen | 5 Jahre            | 3 Jahre               |
| AT&T            | Telefone      | 2 Jahre            | 1 Jahre               |
| Navister        | Lastwagen     | 5 Jahre            | 2,5 Jahre             |
| Hewlett Packard | Drucker       | 4,5 Jahre          | 1,8 Jahre             |

S. 874 Abb. 25  
(in Anlehnung an: Wütherich, H. A.: Neuland des strategischen Denkens, Wiesbaden 1991, S. 16)

# Superschnelle Herstellzeiten

Beispiel:

| Gesellschaft     | Produkt            | Auftragseingang bis Auslieferung: | Auftragseingang bis Auslieferung: neu |
|------------------|--------------------|-----------------------------------|---------------------------------------|
| General Electric | Unterbrecherkasten | 3 Wochen                          | 3 Tage                                |
| Motorola         | Suchgeräte         | 3 Wochen                          | 2 Stunden                             |
| Hewlett Packard  | Prüfgeräte         | 4 Wochen                          | 5 Tage                                |
| Brunswick        | Fischereigeräte    | 3 Wochen                          | 1 Woche                               |

S. 874 Abb. 26  
 (in Anlehnung an: Nagel, K.: Weiterbildung als strategischer Erfolgsfaktor: Der Weg zum unternehmerisch denkenden Mitarbeiter, 2. Aufl., Landsberg/Lech 1991, S. 33 )



## Gründe für negative Reaktionen beim Einsatz neuer Technologien

- Geänderte Prozesse bedingen Rationalisierungen
- Angst vor Arbeitsplatzverlust
- Fachliche Unsicherheit bei den Mitarbeitern
- Technisierung bedingt Transparenzverlust eines Prozesses
- Angst vor Statusverlust
- Neue Technologien haben die Wirtschaftlichkeit als Richtpfad nicht individuelle Befindlichkeiten der Mitarbeiter

## **Maßnahmen zur Sicherung der Arbeitsplätze**

- Hauseigene Mitarbeiter besetzen neue Stellen
- Keine finanzielle und tätigkeitsbezogene Verschlechterung bei firmeninternen Versetzungen
- Das Ende der Probezeit beinhaltet Option, den alten Arbeitsplatz zurückzubekommen
- Bisherige Außenaufträge werden zu Innenaufträgen
- Ausscheidendes Personal soll bei Technologisierung nicht ersetzt werden

# Auswirkungen und Erfordernisse bei Einführung neuer Technologien

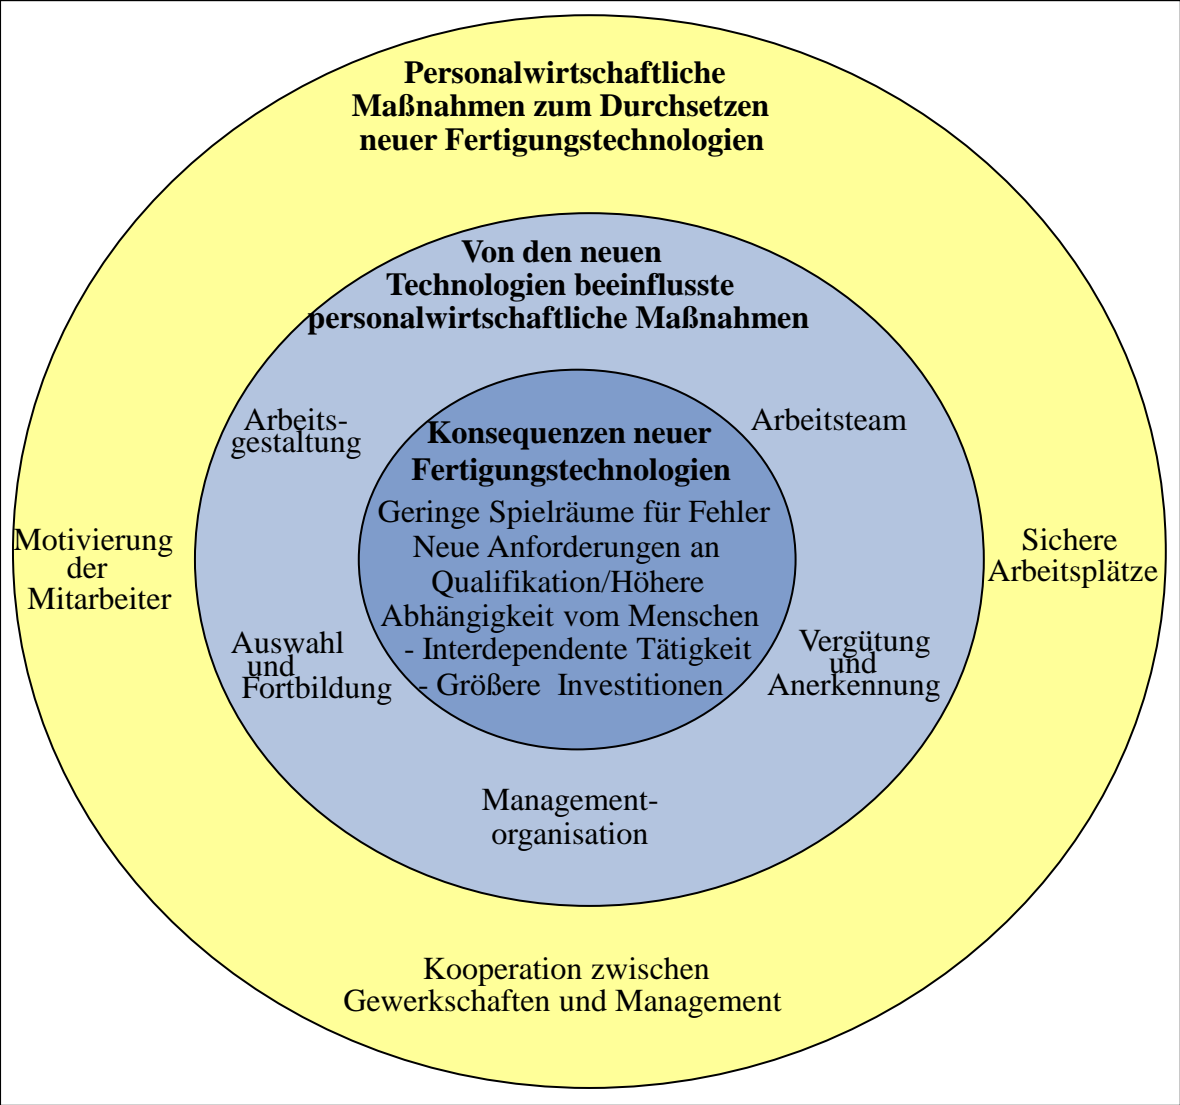

S. 877 Abb. 27  
Quelle: Vgl. Walton, R./  
Susman, G.: Personalmanagement  
in der Fabrik der Zukunft. in:  
Harvardmanager, Heft 4/1987, S. 61 ff.



## Notizen

## 2. Konsequenzen für die Personalwirtschaft

- 2.1 Veränderte Rolle der Führungskraft
- 2.2 Flexibilisierung und Individualisierung
- 2.3 Neue Ansätze in der Vergütungspolitik

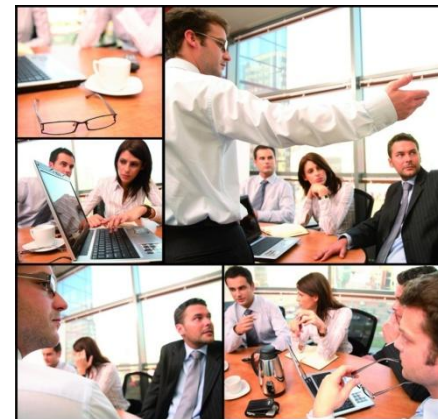

# Spannungsfelder des Personalmanagement:

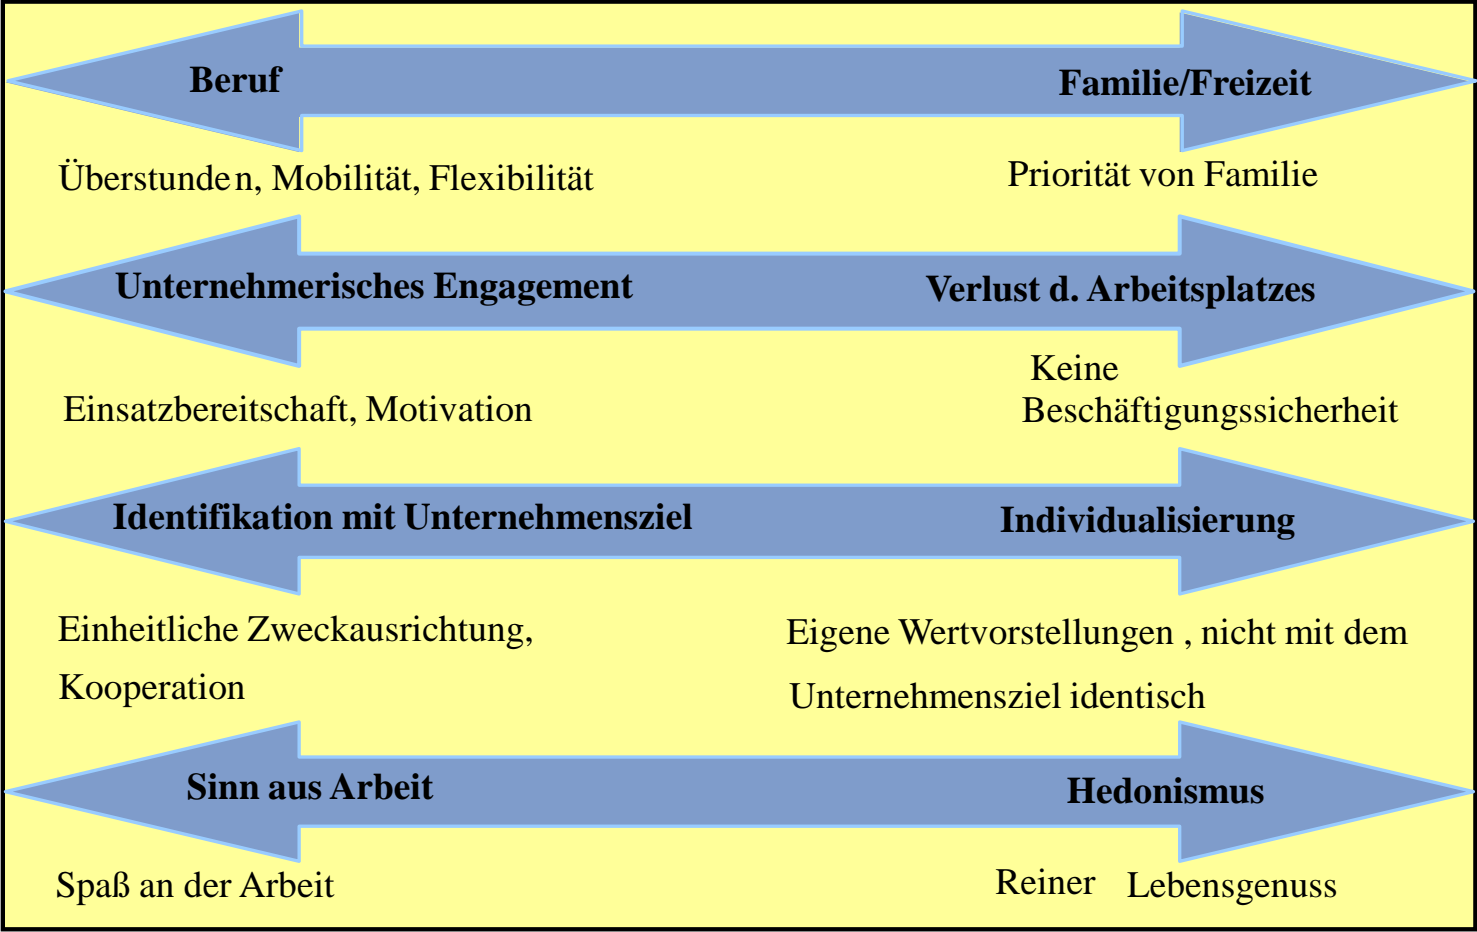



## Zukunftswichtige Managerqualifikationen

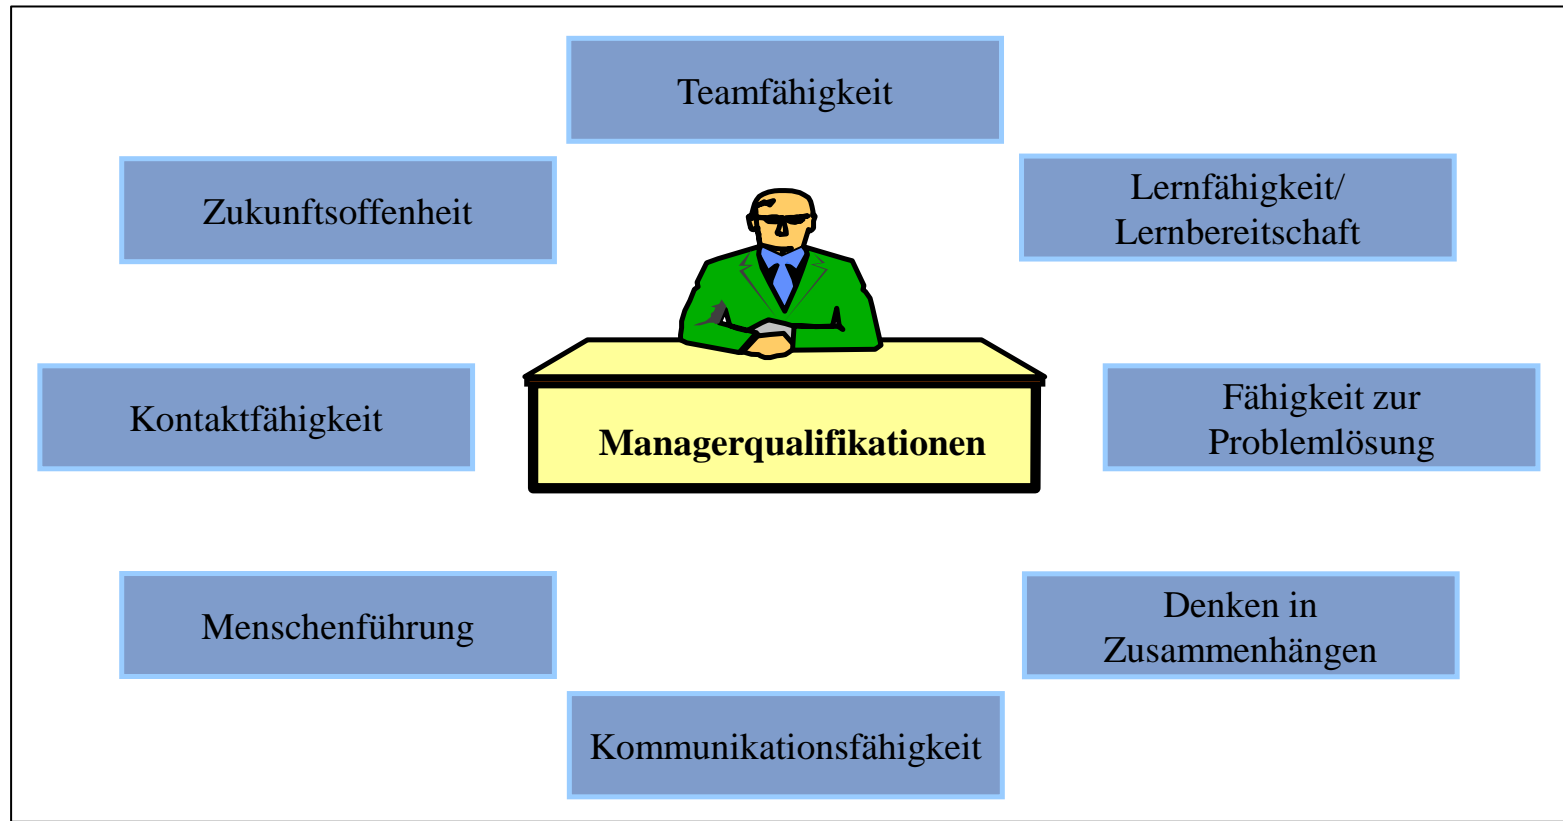

# Anforderungen an die Führungskraft der Zukunft

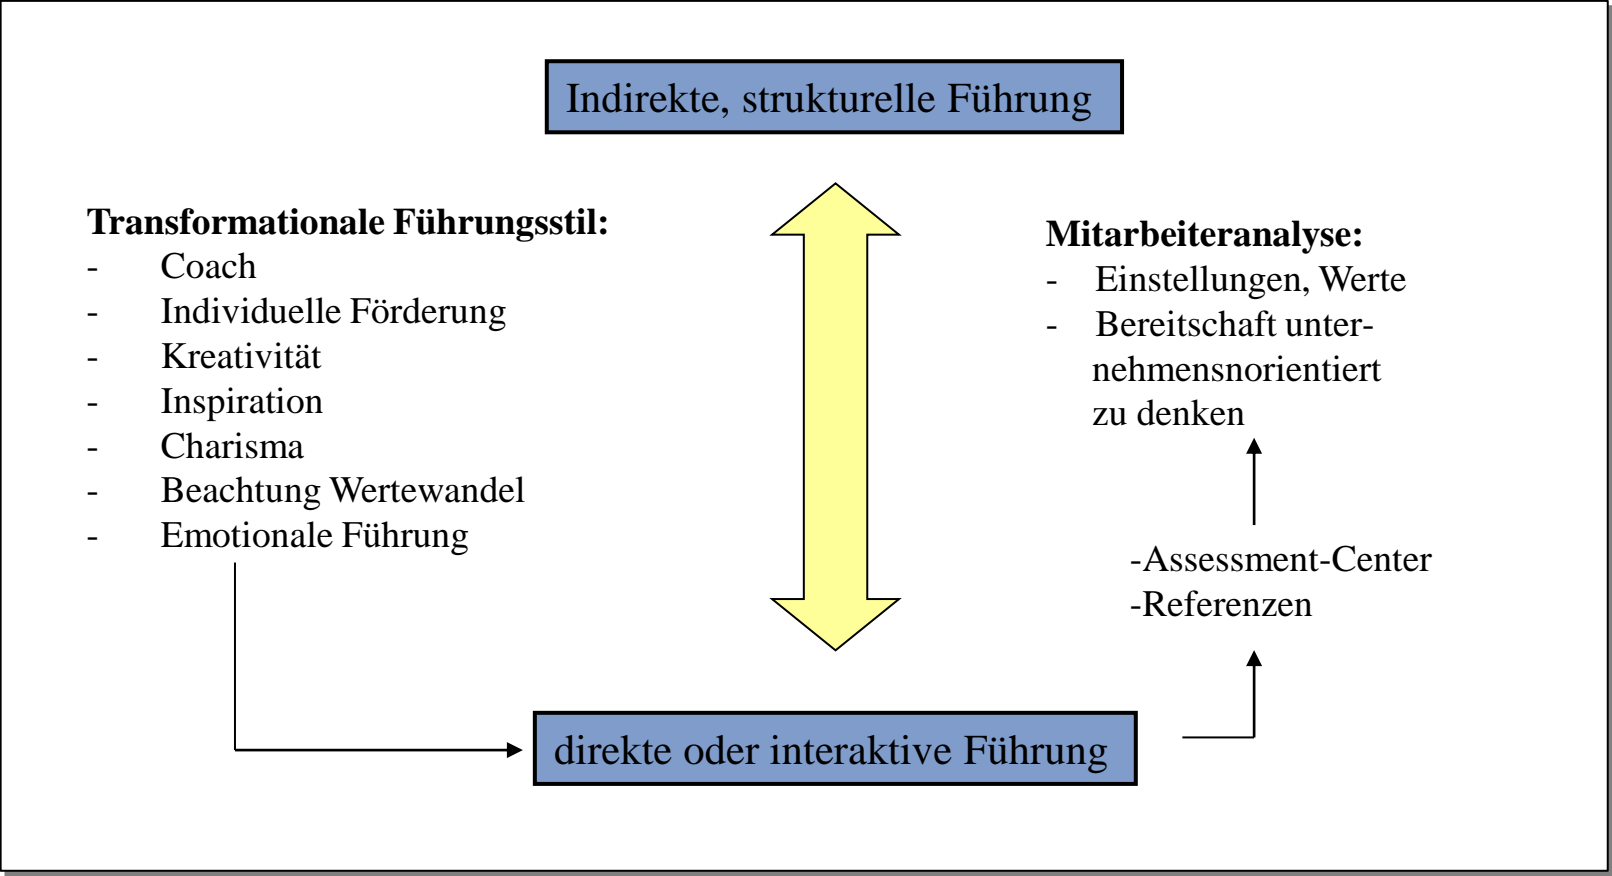

| <b>Das Anforderungsprofil der Führungskraft nach 2010</b>                                                                                                                                                                                                                                                                                                                                                                                                                                                                                                                                                                                                                                                                               |
|-----------------------------------------------------------------------------------------------------------------------------------------------------------------------------------------------------------------------------------------------------------------------------------------------------------------------------------------------------------------------------------------------------------------------------------------------------------------------------------------------------------------------------------------------------------------------------------------------------------------------------------------------------------------------------------------------------------------------------------------|
| <b>Fachliche Kompetenz</b>                                                                                                                                                                                                                                                                                                                                                                                                                                                                                                                                                                                                                                                                                                              |
| <ul style="list-style-type: none"> <li>-Fachwissen in Abhängigkeit der jeweiligen Aufgabenstellung (zum Beispiel kaufmännische, juristische, technische Fachgebiete);</li> <li>-Kenntnisse der Unternehmensführung (Systemorientiertes Management);</li> <li>-betriebswirtschaftliche Kennziffern interpretieren;</li> <li>-gesamtwirtschaftliche Entwicklungen einschätzen;</li> <li>-Spezialkenntnisse im Arbeits- und Sozialrecht;</li> <li>-ein bis zwei Fremdsprachen beherrschen etc.</li> </ul>                                                                                                                                                                                                                                  |
| <b>Methodische/Strategische Kompetenz</b>                                                                                                                                                                                                                                                                                                                                                                                                                                                                                                                                                                                                                                                                                               |
| <ul style="list-style-type: none"> <li>-Beherrschung der Instrumente des strategischen und operativen Managements</li> <li>-Entscheidungen treffen und vertreten, Strategien einleiten;</li> <li>-Erfolgskriterien definieren, Lösungsalternativen bewerten;</li> <li>-Handlungsfolgen abschätzen und Handlungseffizienz bewerten;</li> <li>-Methoden des Denkens beherrschen (Mind-Mapping, Suggestopädie u.a.);</li> <li>-neue Wege des Selbstmanagements kennen (neues "Zeit"-Bewusstsein);</li> <li>-neue Kommunikations- und Informationssysteme einsetzen;</li> <li>-Veränderungen/Entwicklungen erkennen und einschätzen;</li> <li>-Polaritäten im Gleichgewicht halten;</li> <li>-Qualitätsmanagement betreiben etc.</li> </ul> |
| <b>Soziale/Emotionale Kompetenz</b>                                                                                                                                                                                                                                                                                                                                                                                                                                                                                                                                                                                                                                                                                                     |
| <ul style="list-style-type: none"> <li>-Mitarbeitern Ziele und Arbeitsinhalte vermitteln;</li> <li>-Partizipation bei der Ziel- und Strategiefindung zulassen;</li> <li>-Mitarbeiter informieren, Visionen kommunizieren;</li> <li>-Kommunikationsstrukturen steuern (koordinieren, moderieren, integrieren);</li> <li>-Selbstorganisation fördern;</li> <li>-Mitarbeiter motivieren, fördern und entwickeln</li> <li>-Emotional intelligente Organisation schaffen etc.</li> </ul>                                                                                                                                                                                                                                                     |

S. 882 Abb. 29  
(in Anlehnung an: Golemann,  
D./Boyatzis, R./McKee, A.:  
Emotionale Führung, 2. Aufl.,  
München 2004, S. 213)

# Einstellung zur beruflichen Karriere (Angaben in %)

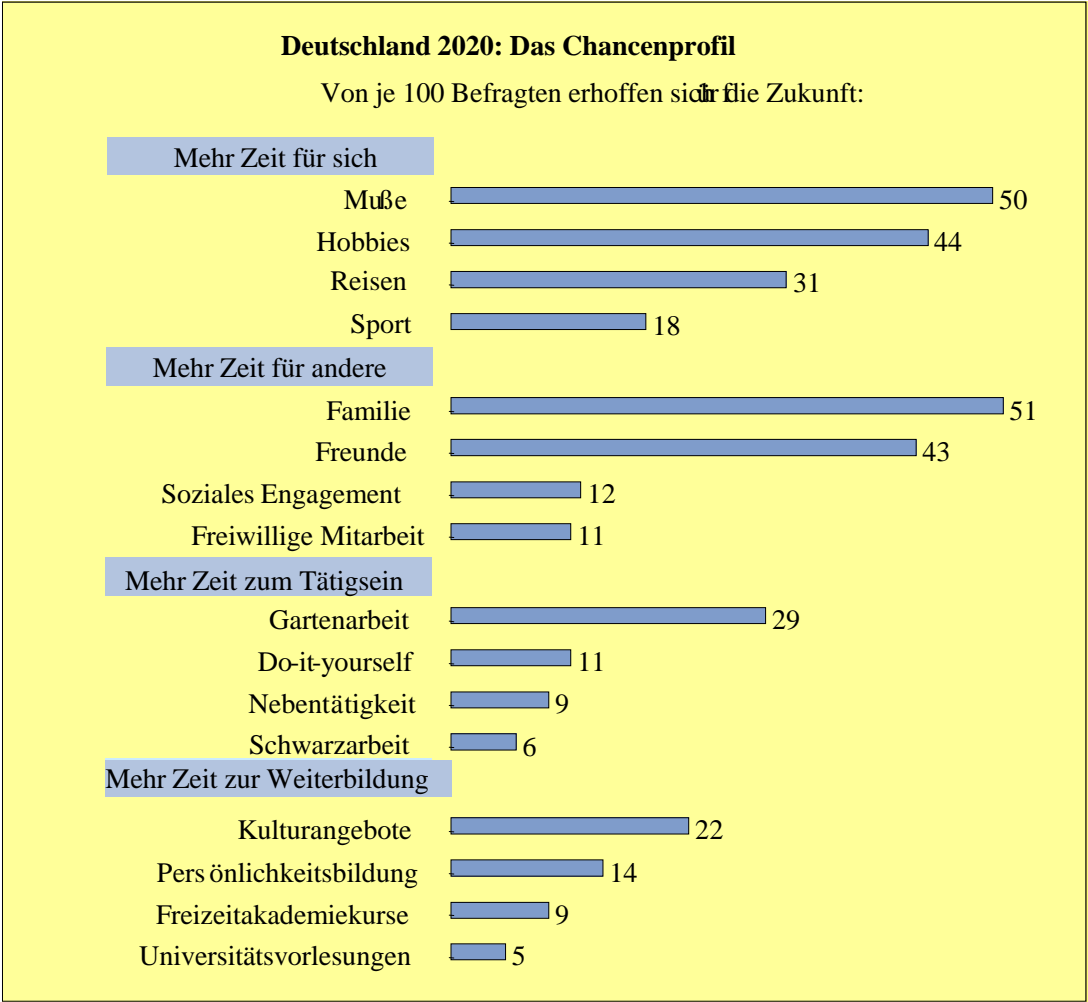

S. 883 Abb. 30

### Worauf zukünftige Führungskräfte Wert legen

- Wichtiges Kriterium für den Wechsel des Arbeitsplatzes ist der Freizeitwert des neuen Wohnorts - danach erst höheres Einkommen und beruflicher Aufstieg.
- Arbeit, Beruf und Familie müssen in Einklang stehen/Freude am Arbeiten und private Erfüllung müssen wieder als Ganzheit gesehen werden.
- Inhalt und Sinn der Tätigkeit stehen bei der Wahl des Arbeitsplatzes im Vordergrund.
- Frauen sind mehr denn je an Karriere interessiert, berufliche Erfolge zu erleben sind aber wichtiger als Führungspositionen oder die Einkommenshöhe.
- Betonung eigener Selbstentfaltung und eigenen Lebensgenusses.
- Höherschätzung einer unzerstörten Natur und der körperlichen Gesundheit.
- Skepsis gegenüber den klassischen Zielen der Industrialisierung wie Wachstum, Gewinn, Leistung und technischer Fortschritt.
- Ablehnung hierarchischer Strukturen und abnehmende Bereitschaft zur Unterordnung bei sinkender Anerkennung der Arbeit als Pflicht.

S. 884 Abb. 31

(in Anlehnung an: Rosenstiel, L. v.: Was erstreben deutsche Führungskräfte nach dem Wertewandel? in: io Management Zeitschrift 62/1993)

**Jung, Hans: Personalwirtschaft, 9. Aufl., München 2010.**

© Oldenbourg Wissenschaftsverlag

## Kennzeichen des von Frauen bevorzugten interaktiven Führungsstile

| Interaktiver Führungsstil                                                                                                                                                                                                                                                                                                                                                                                                                                                                                                                                                                                                                                              |
|------------------------------------------------------------------------------------------------------------------------------------------------------------------------------------------------------------------------------------------------------------------------------------------------------------------------------------------------------------------------------------------------------------------------------------------------------------------------------------------------------------------------------------------------------------------------------------------------------------------------------------------------------------------------|
| <ul style="list-style-type: none"><li>• Die Vorgesetzte ermutigt zur Partizipation.</li><li>• Sie fördert den Kommunikationsfluss und teilt Macht und Informationen.</li><li>• Sie räumt den Mitarbeitern Mitspracherechte ein, von der Definition der Ziele bis zur Festlegung der Strategie.</li><li>• Sie stärkt das Selbstbewusstsein der Mitarbeiter und weckt deren Interesse.</li><li>• Sie vermittelt den Mitarbeitern das Gefühl, wichtig und verantwortlich zu sein.</li><li>• Sie fördert die Gruppenidentität und lebt selbst ein positives Bild vor.</li><li>• Sie spornt die Mitarbeiter an, gibt ihnen Herausforderungen, Ziele und Feedback.</li></ul> |

## Verschiedene Faktoren für die Individualisierung und Flexibilisierung der Arbeitswelt

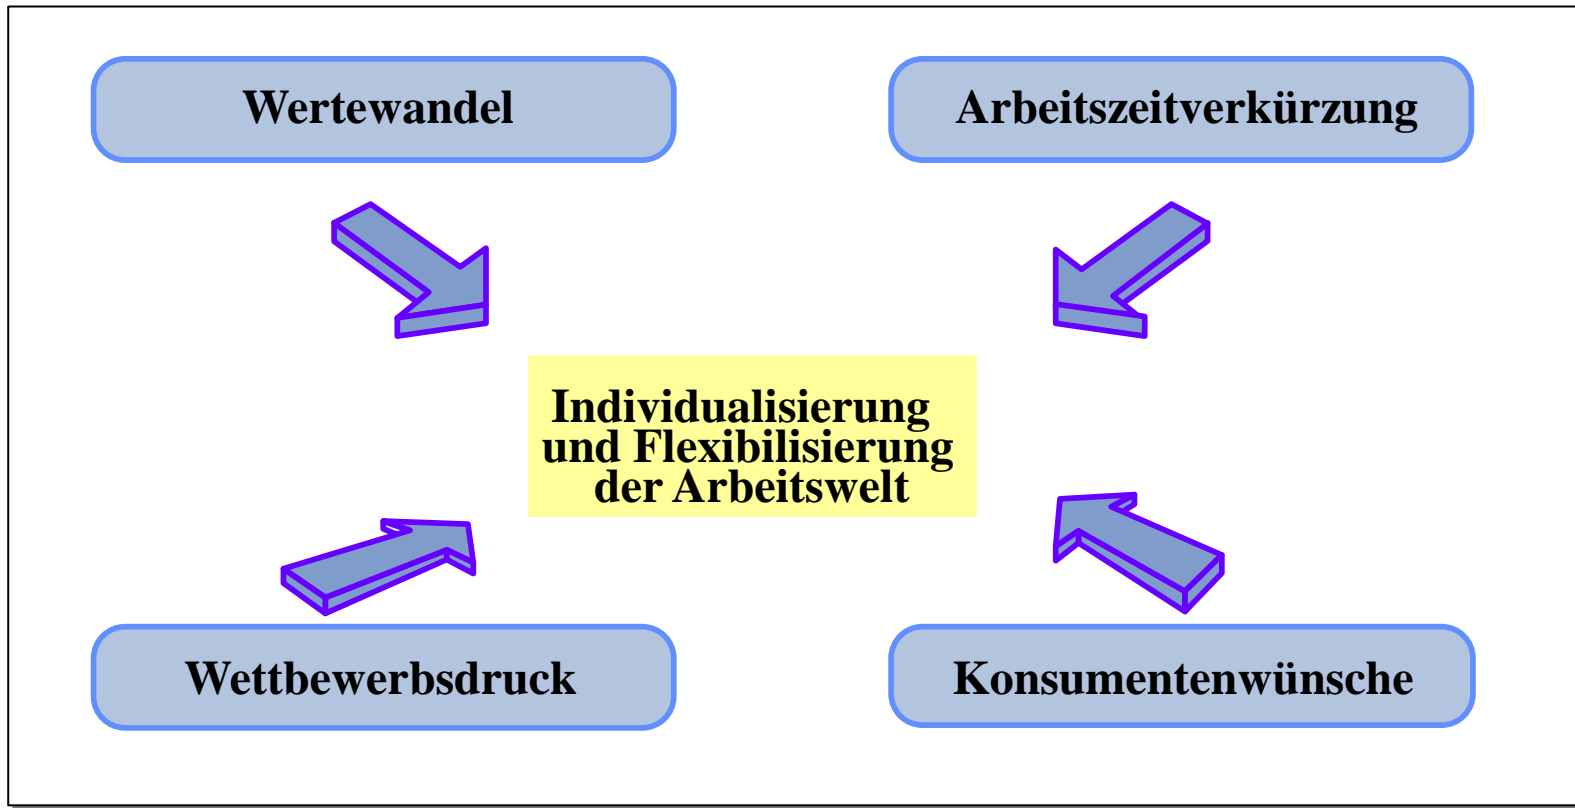

S. 887 Abb. 33

Jung, Hans: Personalwirtschaft, 9. Aufl., München 2010.

© Oldenbourg Wissenschaftsverlag

## Verschiedene Ansatzpunkte zur Flexibilisierung des Personaleinsatzes

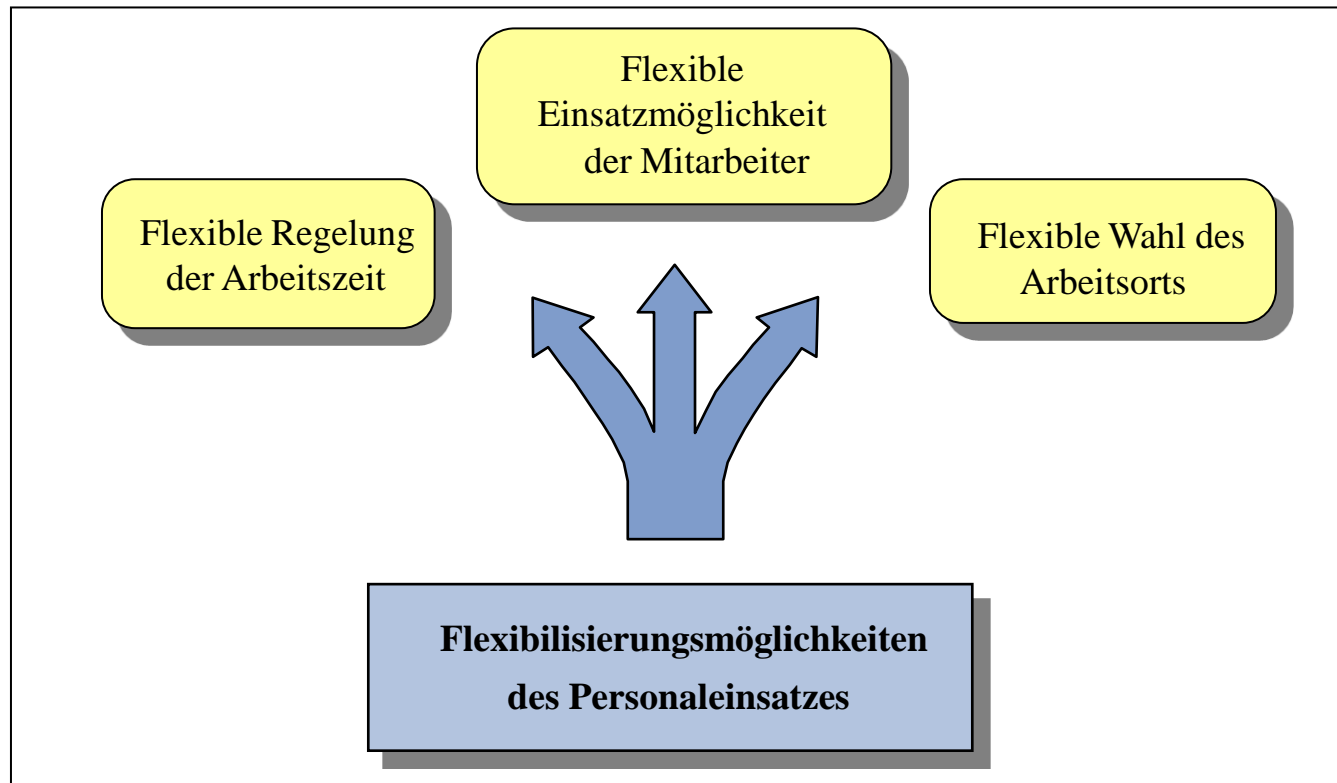



# **Grenzen der Arbeitszeitflexibilität aus Sicht der Gewerkschaft**

| <b>Neue Arbeitszeitregelungen dürfen:</b>                                                                                                                                                                                                       | <b>Flexibilitätsgrenzen sind begründet:</b>                                                                                                                                                                                                                                 |
|-------------------------------------------------------------------------------------------------------------------------------------------------------------------------------------------------------------------------------------------------|-----------------------------------------------------------------------------------------------------------------------------------------------------------------------------------------------------------------------------------------------------------------------------|
| <ul style="list-style-type: none"> <li>- keine negativen Beschäftigungsauswirkungen haben,</li> <li>- nicht zu zusätzlichen Belastungen führen,</li> <li>- die Freizeit nicht verringern</li> <li>- und das Einkommen nicht mindern.</li> </ul> | <ul style="list-style-type: none"> <li>- im Schutz der Gesundheit des einzelnen Beschäftigten,</li> <li>- im Schutz sozialer Interessen und Lebensmöglichkeit des Menschen</li> <li>- und in der Herstellung gleicher Konkurrenzbedingungen für die Unternehmen.</li> </ul> |

S. 889 Abb. 35

# Gleizeitvereinbarung eines Computerunternehmens

| Gleitzeitvereinbarung    |                                                                                                                                                                                                                                                                                                                   |
|--------------------------|-------------------------------------------------------------------------------------------------------------------------------------------------------------------------------------------------------------------------------------------------------------------------------------------------------------------|
| Arbeitszeitrahmen:       | 6.30 - 21.00 Uhr Normalzeit möglich                                                                                                                                                                                                                                                                               |
| Mindestarbeitszeit:      | 4 Stunden                                                                                                                                                                                                                                                                                                         |
| Ansprechzeit;            | 8.00 - 17.30 Uhr<br>- 30 Minuten Verlängerungsoption<br>- 30/60 Minuten Verschiebungsoption nach vorn oder hinten<br>- insgesamt also 10 Variationsmöglichkeiten                                                                                                                                                  |
| Funktionsgruppen:        | bestehen aus min. 4 Mitarbeiter/innen                                                                                                                                                                                                                                                                             |
| Kernzeit:                | entfällt                                                                                                                                                                                                                                                                                                          |
| Pausenzeit:              | - Abstimmung innerhalb der Funktionsgruppe<br>- Mittagspause 30 - 120 Minuten, Pausenbeginn zwischen 11.30 und 12.30 Uhr<br>- weitere Pausen nach Absprache möglich<br>- Pausen werden elektronisch beim Verlassen des Betriebes erfasst<br>- keine Pflicht zur Pausennahme, es gelten die AZO-Pausenvorschriften |
| Sollarbeitszeit:         | 7,7 Stunden/Tag                                                                                                                                                                                                                                                                                                   |
| Normalarbeitszeit:       | 8.30 - 16.42 Uhr; verschiebt sich ggf. mit der Ansprechzeit                                                                                                                                                                                                                                                       |
| Arbeitszeitverlängerung: | bei Ankündigung bis 12.00 Uhr: Arbeitsverpflichtung                                                                                                                                                                                                                                                               |

S. 890 Abb. 36 A  
 (in Anlehnung an Hoff, A.: Arbeitszeitberatung Berlin, Thesen zum Zukunftsprojekt "Individualisierung der betrieblichen Arbeitszeitgestaltung")

| Gleitzeitvereinbarung      |                                                                                                                                                                                                                                                                                                                                                                                                |
|----------------------------|------------------------------------------------------------------------------------------------------------------------------------------------------------------------------------------------------------------------------------------------------------------------------------------------------------------------------------------------------------------------------------------------|
| Aussetzen der Gleitzeit:   | <ul style="list-style-type: none"> <li>- bis Ende Normalarbeitszeit möglich</li> <li>- bei Ankündigung bis Ende Vortag: Arbeitsverpflichtung ab Beginn Normalzeit möglich</li> <li>- Gleitzeit vorübergehend/auf Dauer aussetzbar</li> <li>- einmal pro Woche: Arbeitsverpflichtung ab Beginn/ bis Ende Ansprechzeit möglich</li> </ul>                                                        |
| Überstunden:               | außerhalb der Ansprechzeiten auf Anordnung des Vorgesetzten                                                                                                                                                                                                                                                                                                                                    |
| Dienstreisen:              | für eintägige Dienstreisen max. 10 Stunden Zeitgutschrift (einschl. Reisezeit); bei mehrtägigen Dienstreisen bis zu 10 Stunden für An- und Abreisetag (jeweils einschl. Reisezeit) Dienstreisetag dazwischen mit 7,7 Stunden                                                                                                                                                                   |
| Arztbesuch:                | in dringenden Fällen: Zeitgutschrift zwischen 9.00 - 16.00 Uhr                                                                                                                                                                                                                                                                                                                                 |
| freie Tage auf Zeitkonto:  | jederzeit, wenn der Vorgesetzte zustimmt                                                                                                                                                                                                                                                                                                                                                       |
| Gleitzeitbeauftragte:      | in jedem Bereich                                                                                                                                                                                                                                                                                                                                                                               |
| Zeitguthaben/Zeitschulden: | <ul style="list-style-type: none"> <li>- Im Rahmen des Kurzzeitkontos max. +40/-25 auf den Folgemonat übertragbar</li> <li>- danach Übertragung des Zeitguthabens bis zu 60 Stunden pro Quartal auf ein Langzeitkonto (Anrechnung mit 40 % des vollen Stundenwertes). Bei Zeitschulden &gt; 25 Stunden Entgeltabzug</li> <li>- Mindestentnahme aus dem Langzeitkonto: 3 Arbeitstage</li> </ul> |

S. 890 Abb. 36 B  
(in Anlehnung an Hoff, A.: Arbeitszeitberatung Berlin, Thesen zum Zukunftsprojekt "Individualisierung der betrieblichen Arbeitszeitgestaltung")

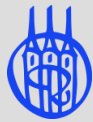

# Gleitzeitmodell und Mitarbeiterpool Bertelsmann Distribution

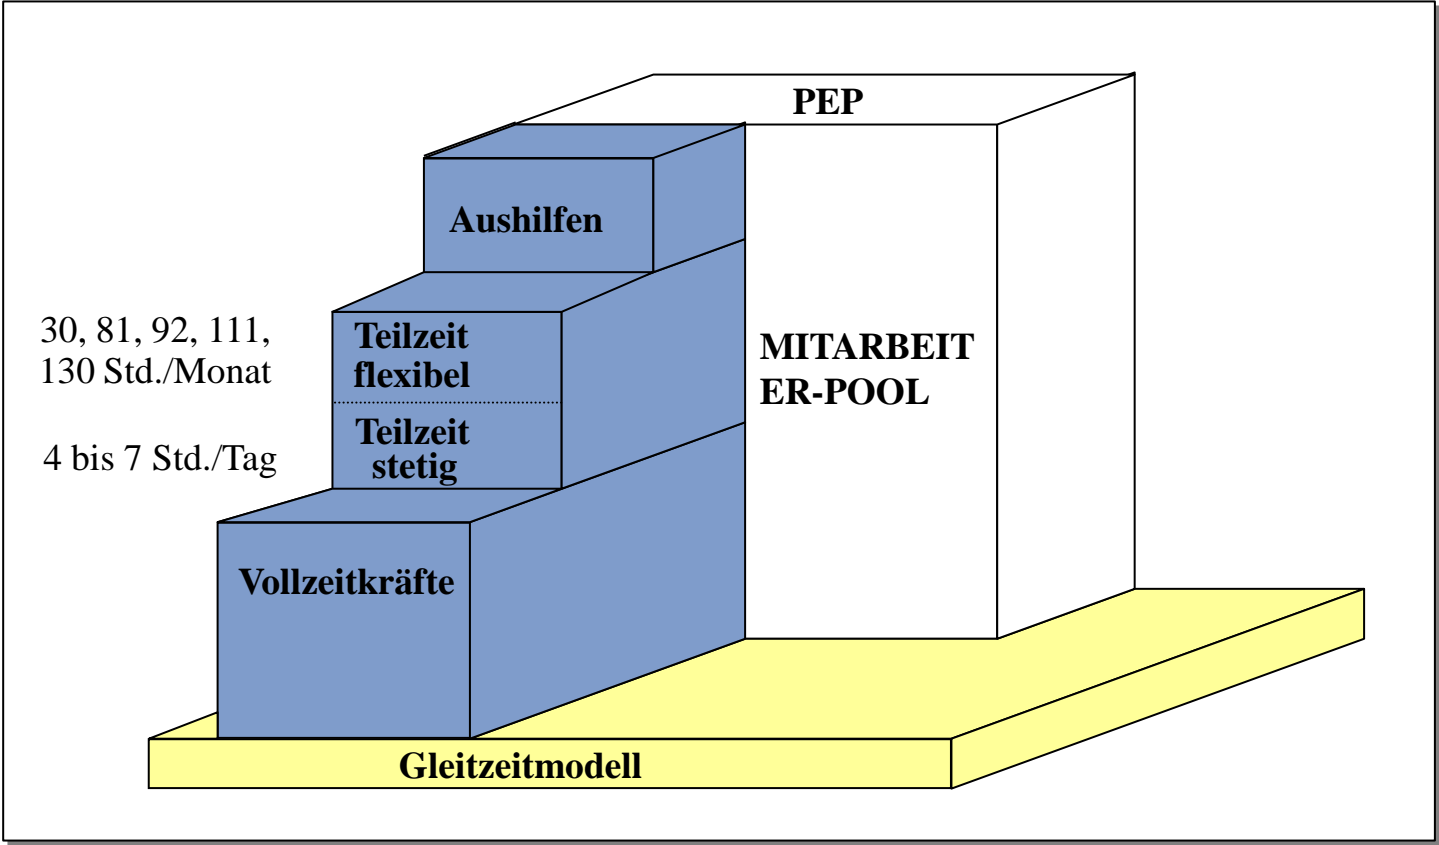

S. 891 Abb. 37  
(in Anlehnung an: Bertelsmann Distribution: Unser Arbeitszeitmodell, Gütersloh)

# Vorteile des innerbetrieblichen Personalleasing

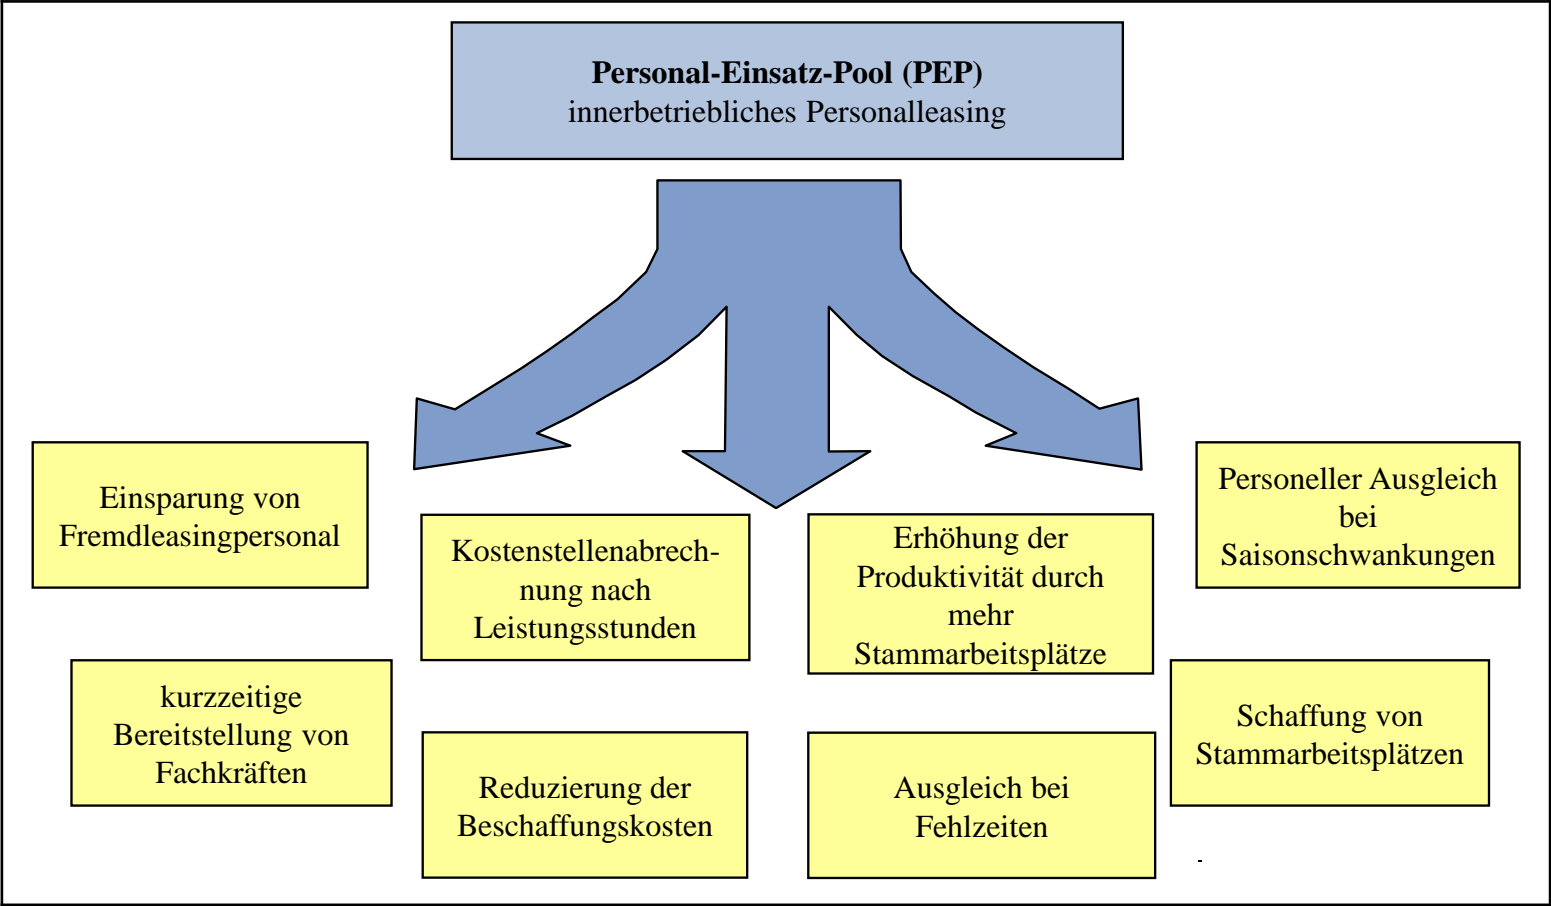

S.892 Abb. 38  
(in Anlehnung an: Bertelsmann Distribution: Unser Arbeitszeitmodell, Gütersloh)

## Die wichtigsten Voraussetzungen eines flexibel einsetzbaren Mitarbeiters

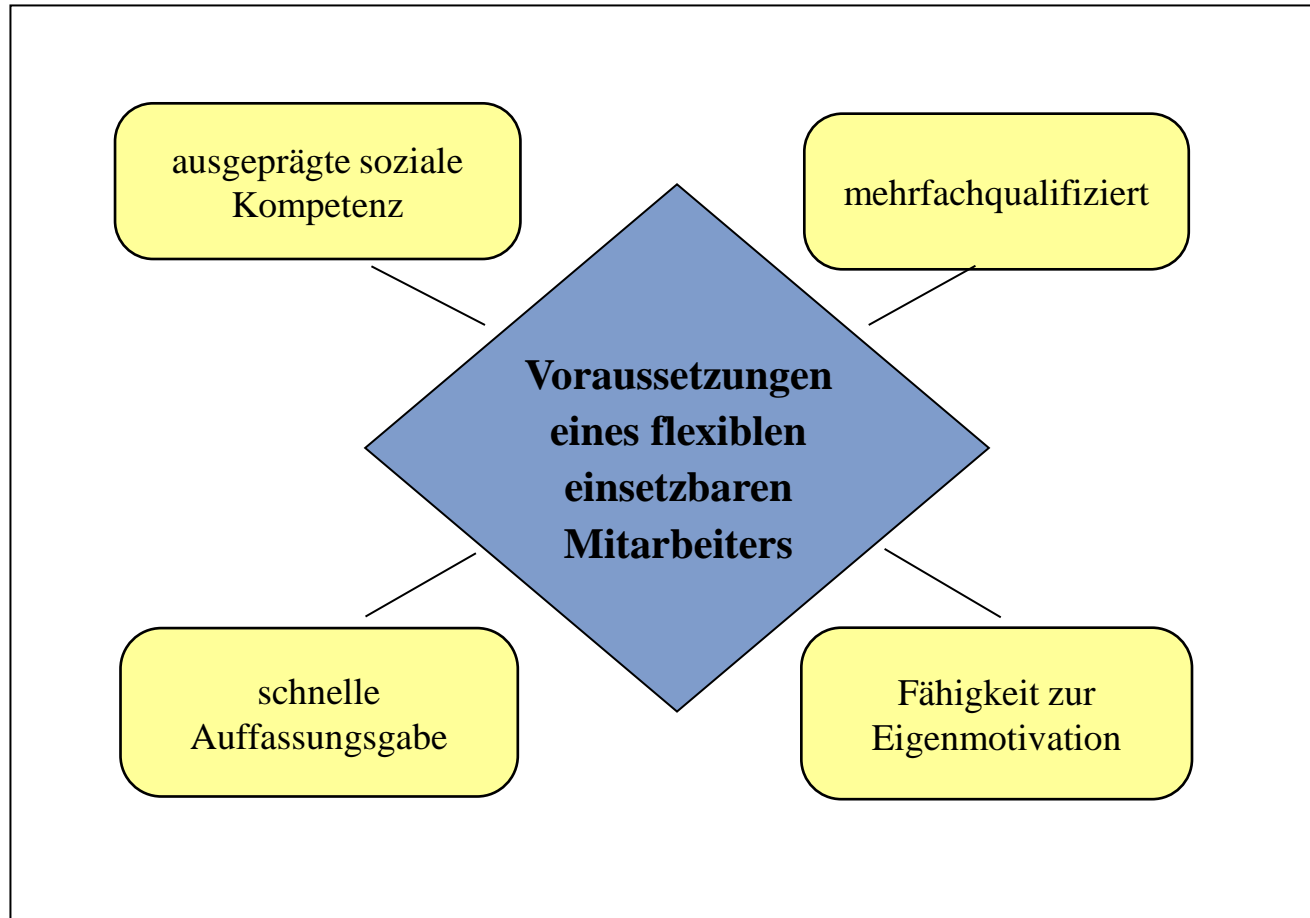

S.893 Abb. 39

Jung, Hans: Personalwirtschaft, 9. Aufl., München 2010.

© Oldenbourg Wissenschaftsverlag

## Hilfsmittel flexibler Telearbeiten

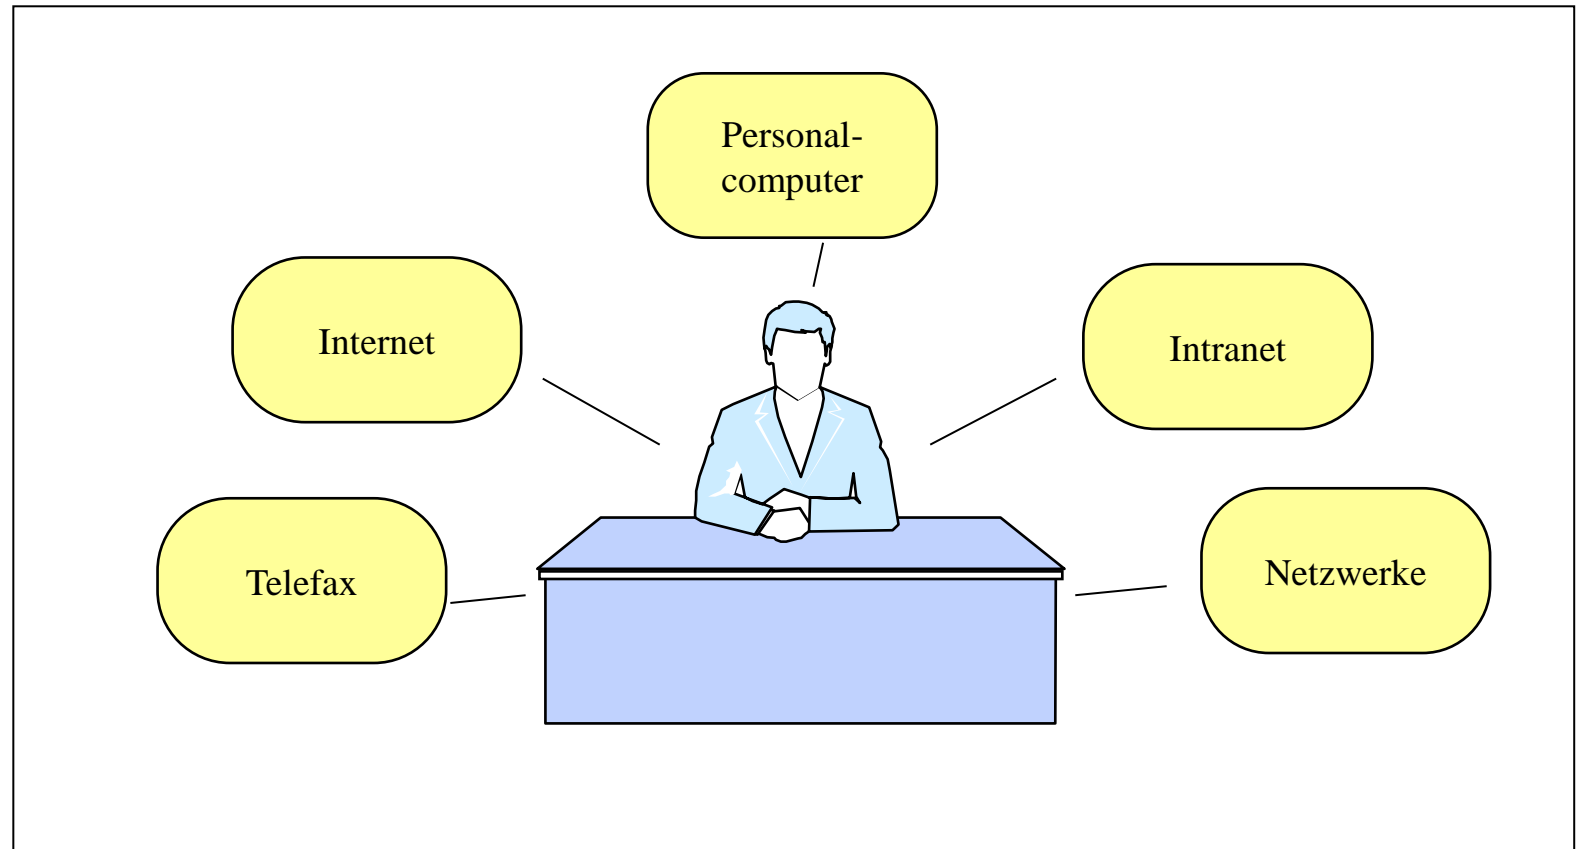

S.894 Abb. 40

# Bedeutung der variablen Vergütung

| Ebenen           | Empfänger | Höhe in % der Gesamtbezüge |
|------------------|-----------|----------------------------|
| Geschäftsführung | 87 %      | 28 %                       |
| 1. Führungsebene | 76 %      | 17%                        |
| 2. Führungsebene | 65 %      | 13 %                       |

S. 896 Abb. 41



# Beispiele für mögliche Gehälter

|                            | Festgehalt<br>(in €) | Erfolgszuschläge<br>(in Prozent) |
|----------------------------|----------------------|----------------------------------|
| Hilfskräfte                | 1.500                | 0 - 30                           |
| Sachbearbeiter             | 2.500                | 0 - 60                           |
| Führungskräfte             | 3.500                | 0 - 250                          |
| Bereichsverantwortliche    | 4.500                | 0 - 500                          |
| Vorstand, Geschäftsführung | 5.500                | 0 - 1.000                        |

S. 898 Abb. 42  
(in Anlehnung an Hörner, M.: Entgeltsysteme: Neue Ideen und Wege. in: Personal 2000: Visionen und Strategien erfolgreicher Personalarbeit, Hrsg. von Feix, W. E., a.a.O., S. 163)

## Das Cafeteria-Modell

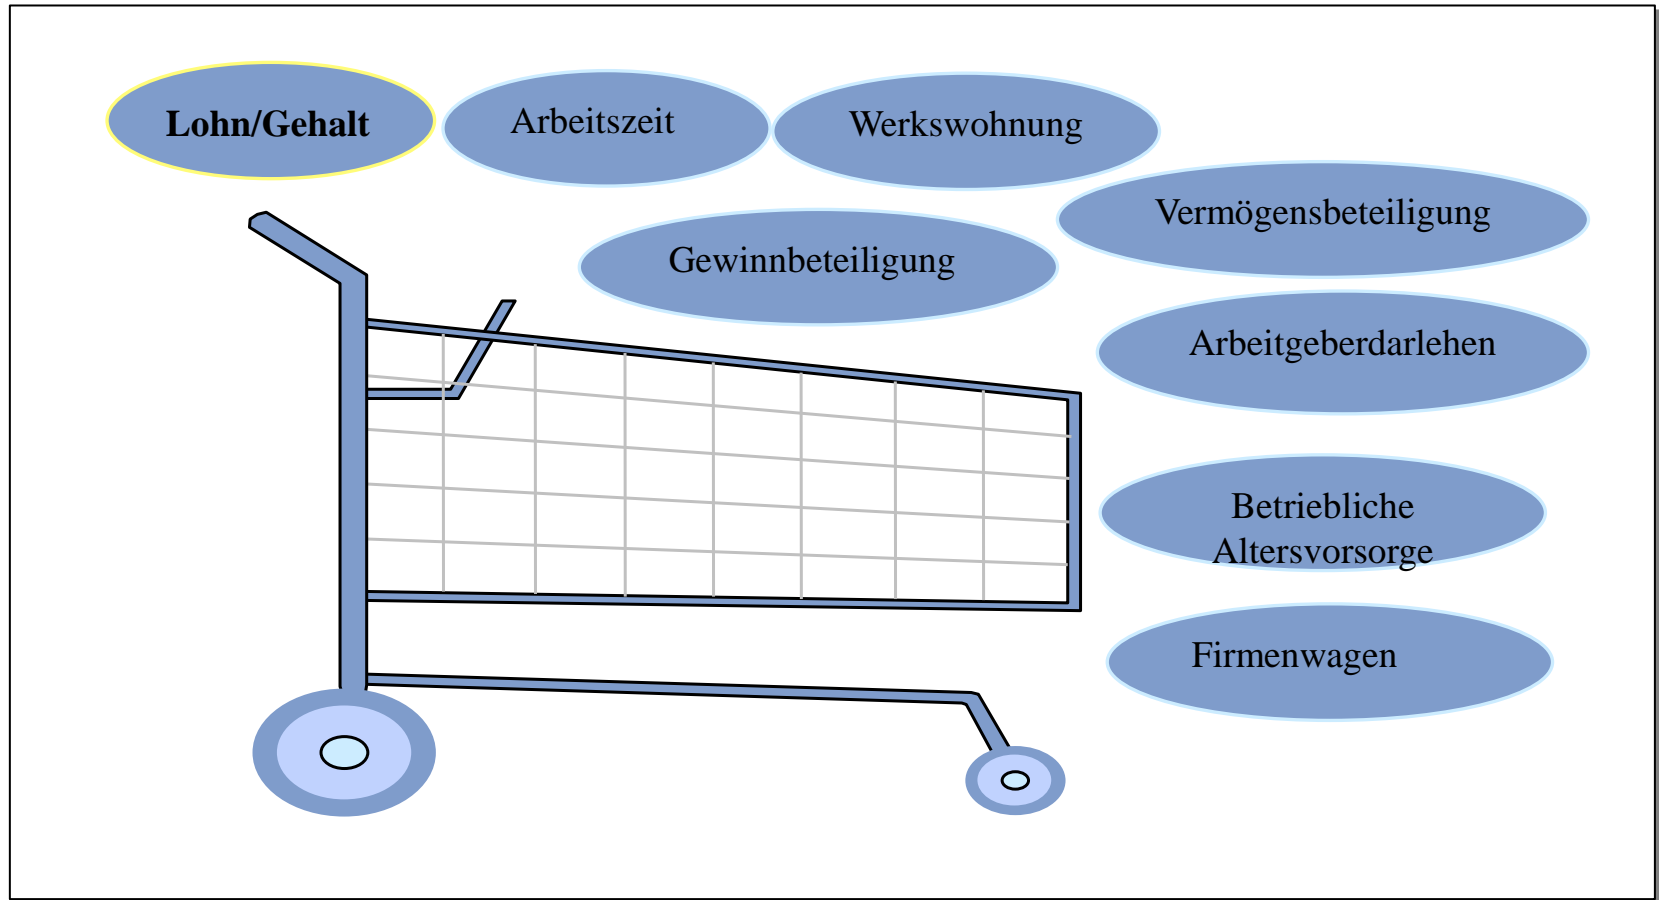

S. 901 Abb. 43

Jung, Hans: Personalwirtschaft, 9. Aufl., München 2010.

© Oldenbourg Wissenschaftsverlag

# Deferred Compensation - Vorteile für Unternehmen und Mitarbeiter

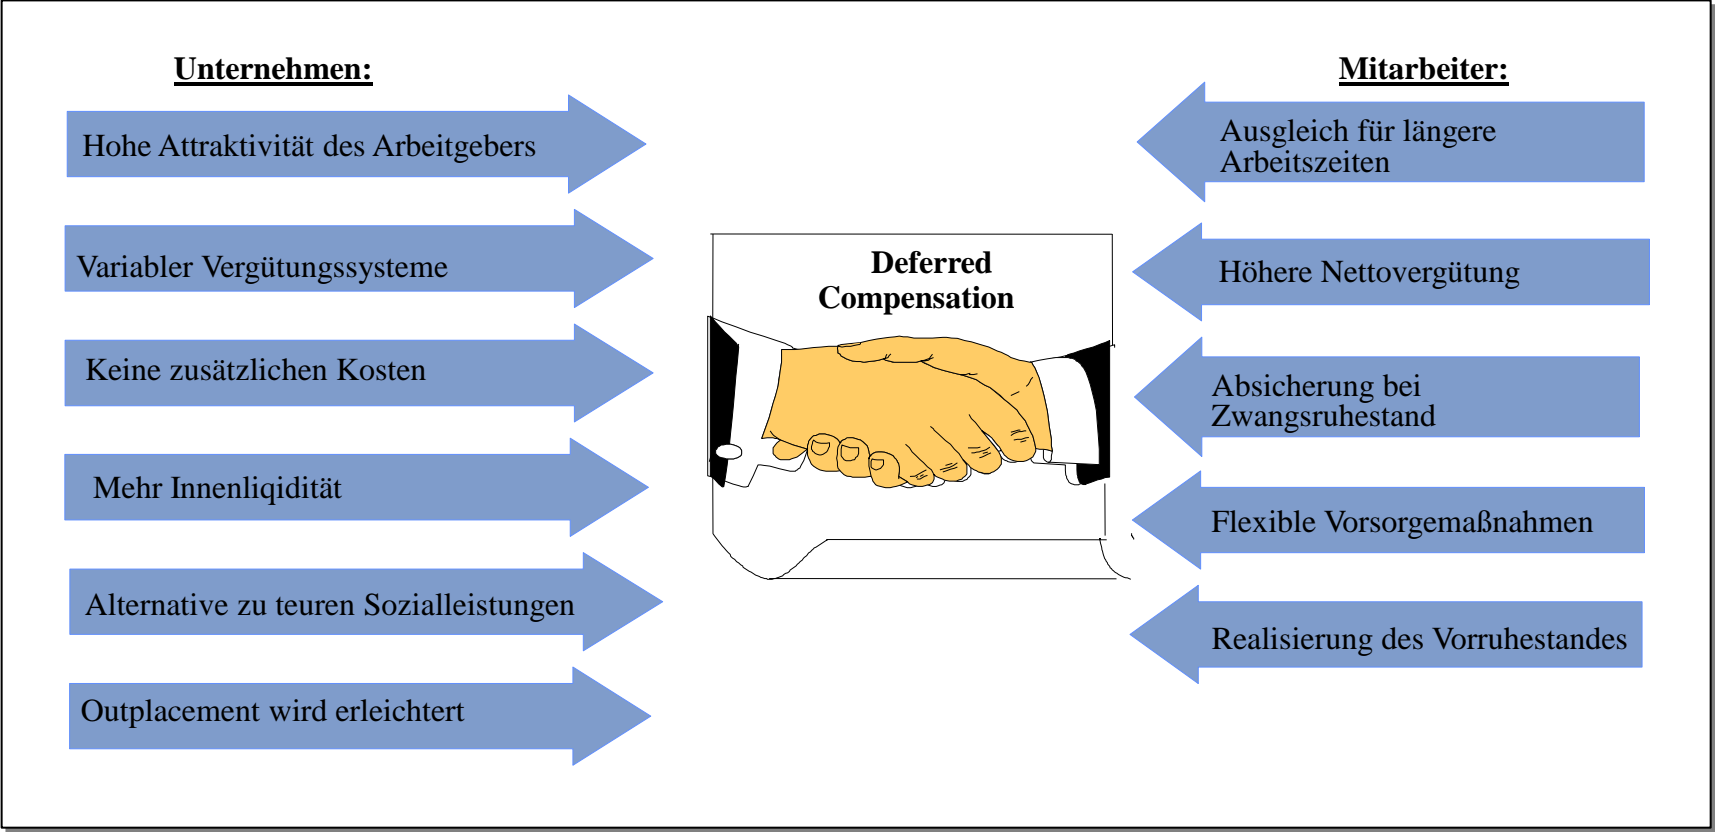

S. 903 Abb. 44  
(in Anlehnung an: Schmahl, D. W./Neubauer, F.: "Win-Win". Erfolge mit Deferred Compensation. in: Personalführung, Heft 4/1994, S. 300)



## Notizen

## 3. Trends in Personalmanagement und Organisation

- 3.1 Lean Management
- 3.2 Qualitätsmanagement
- 3.3 Innovatives Management
- 3.4 Visionäres Management
- 3.5 Chaosmanagement
- 3.6 Ganzheitliches Management

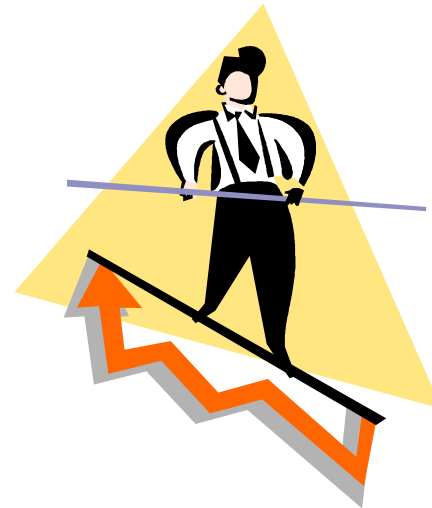

# Die Ebenen des Lean-Management

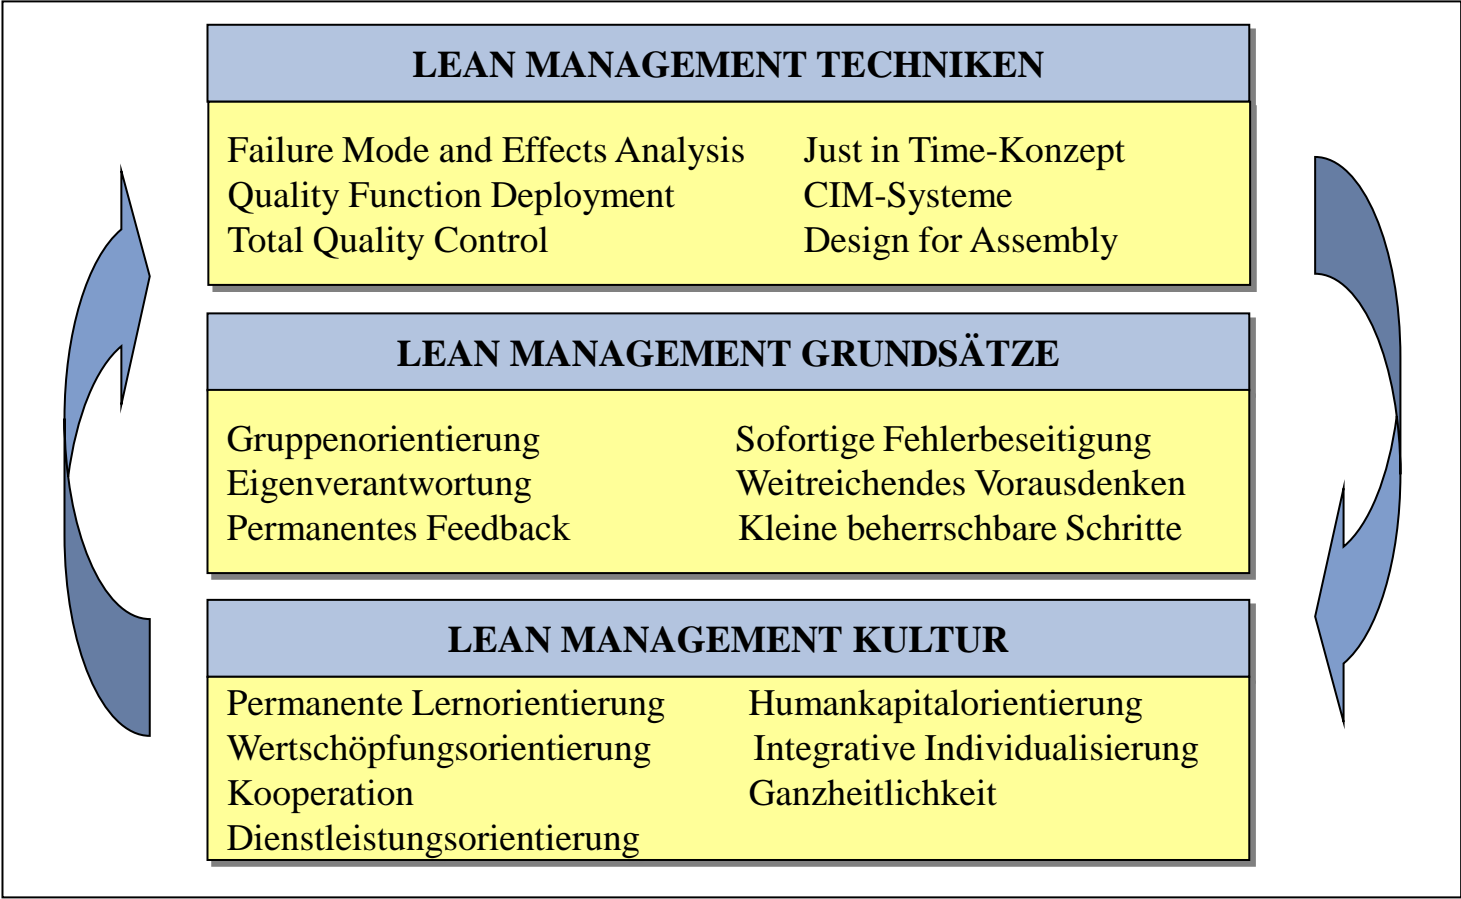

S. 906 Abb. 45

Jung, Hans: Personalwirtschaft, 9. Aufl., München 2010.

© Oldenbourg Wissenschaftsverlag

# Lean Production

| Lean-Production-Produktionssystem                                                                                                                                                                                                                                           |
|-----------------------------------------------------------------------------------------------------------------------------------------------------------------------------------------------------------------------------------------------------------------------------|
| Konzentration auf produktive Prozesse, strikte Prozessorientierung, Organisationsaufbau der indirekten Bereiche (Einkauf, Logistik, Vertrieb etc.) nach den Bedürfnissen der Fertigung: Produktion als integrierter Prozess                                                 |
| Interne Just-in-time-Produktion mit der Idealvorstellung des Staffellaufes: In einem Fertigungsabschnitt wird jeweils nur das Teil gefertigt, das der folgende Abschnitt unmittelbar nach Fertigstellung des Teils benötigt. Ziel ist die Einsparung an umlaufendem Kapital |
| Verstetigung und hohe Standardisierung auf allen Produktionsstufen                                                                                                                                                                                                          |
| Teamarbeit als Arbeitsform mit dem Auftrag der ständigen Verbesserung (KAIZEN)                                                                                                                                                                                              |
| Schaffung von logischen, einfachen Abläufen (z.B. KANBAN)                                                                                                                                                                                                                   |
| Integrierte, präventive systematische Qualitätssicherung                                                                                                                                                                                                                    |
| Just-in-Time-Prinzip und Integration der Zulieferer als Produktivitätsgewinn                                                                                                                                                                                                |
| Flache Hierarchiestrukturen und damit "Unternehmertum" auf allen Ebenen                                                                                                                                                                                                     |

S. 908 Abb. 46

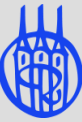

## Lean- Production- System

- Prozessorientierung
- Organisationsaufbau indirekter Bereiche (Einkauf, Logistik, Vertrieb etc.) nach den Bedürfnissen der Fertigung:  
„Produktion als integrierter Prozess“
- Interne Just-in-time-Produktion
- Verstetigung und hohe Standardisierung auf allen Produktionsstufen
- Orientierte Teamarbeit
- Kontinuierliche Verbesserungsprozesse (KVP): „Kaizen“
- Logische Produktionsabläufe: „Kanban“
- Integrierte, präventive systematische Qualitätssicherung
- Flache Hierarchien



## Das Opel-Produktionssystem: Inhalte und Ziele

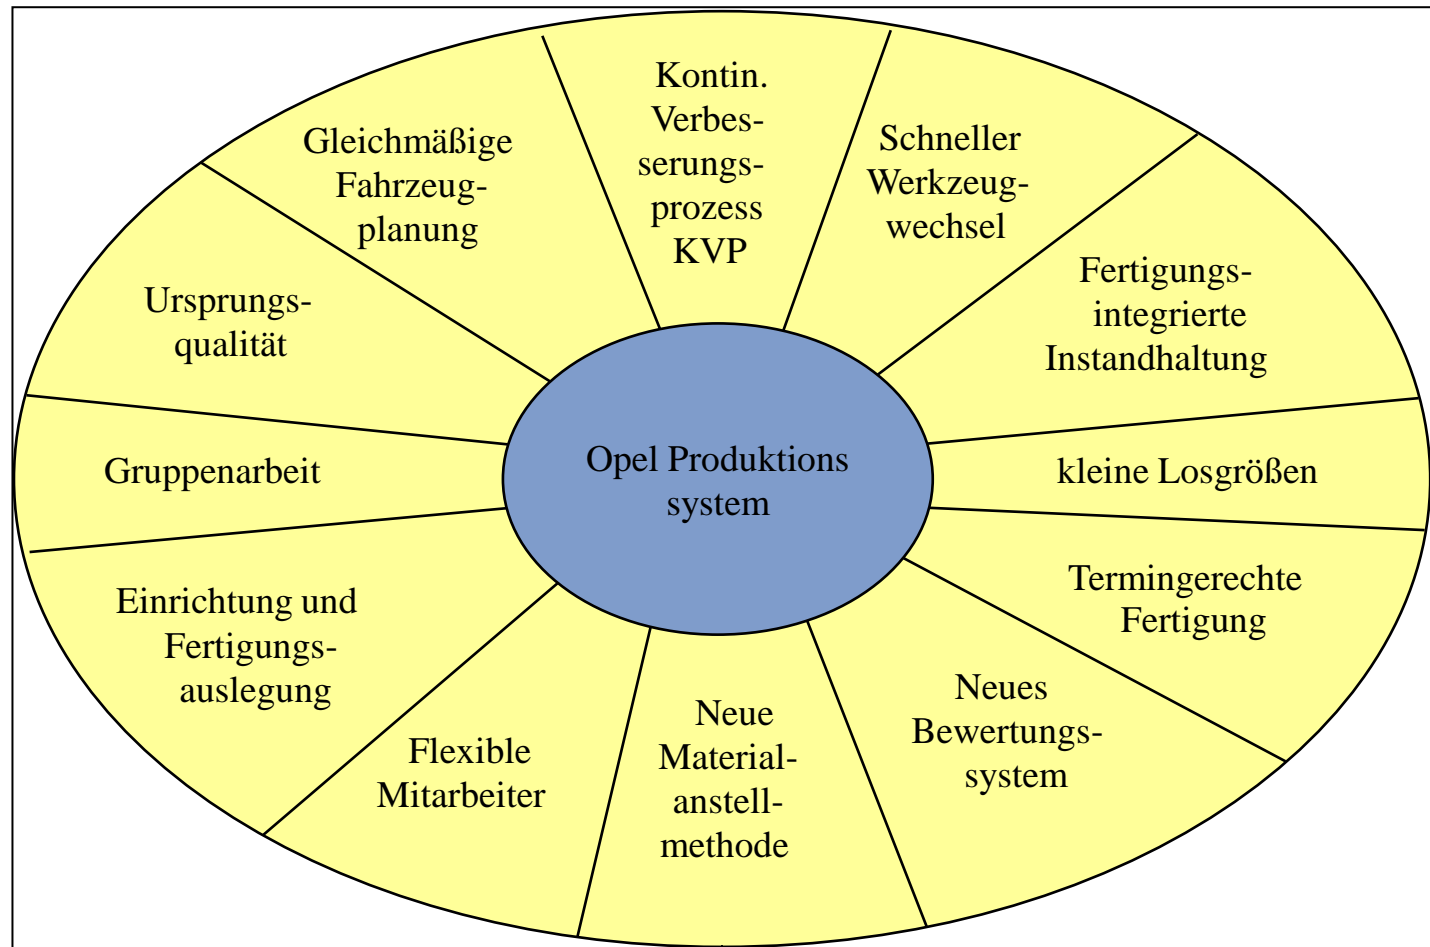

S. 912 Abb. 47

## Der Verstand als Summe von programmierten Denkmustern

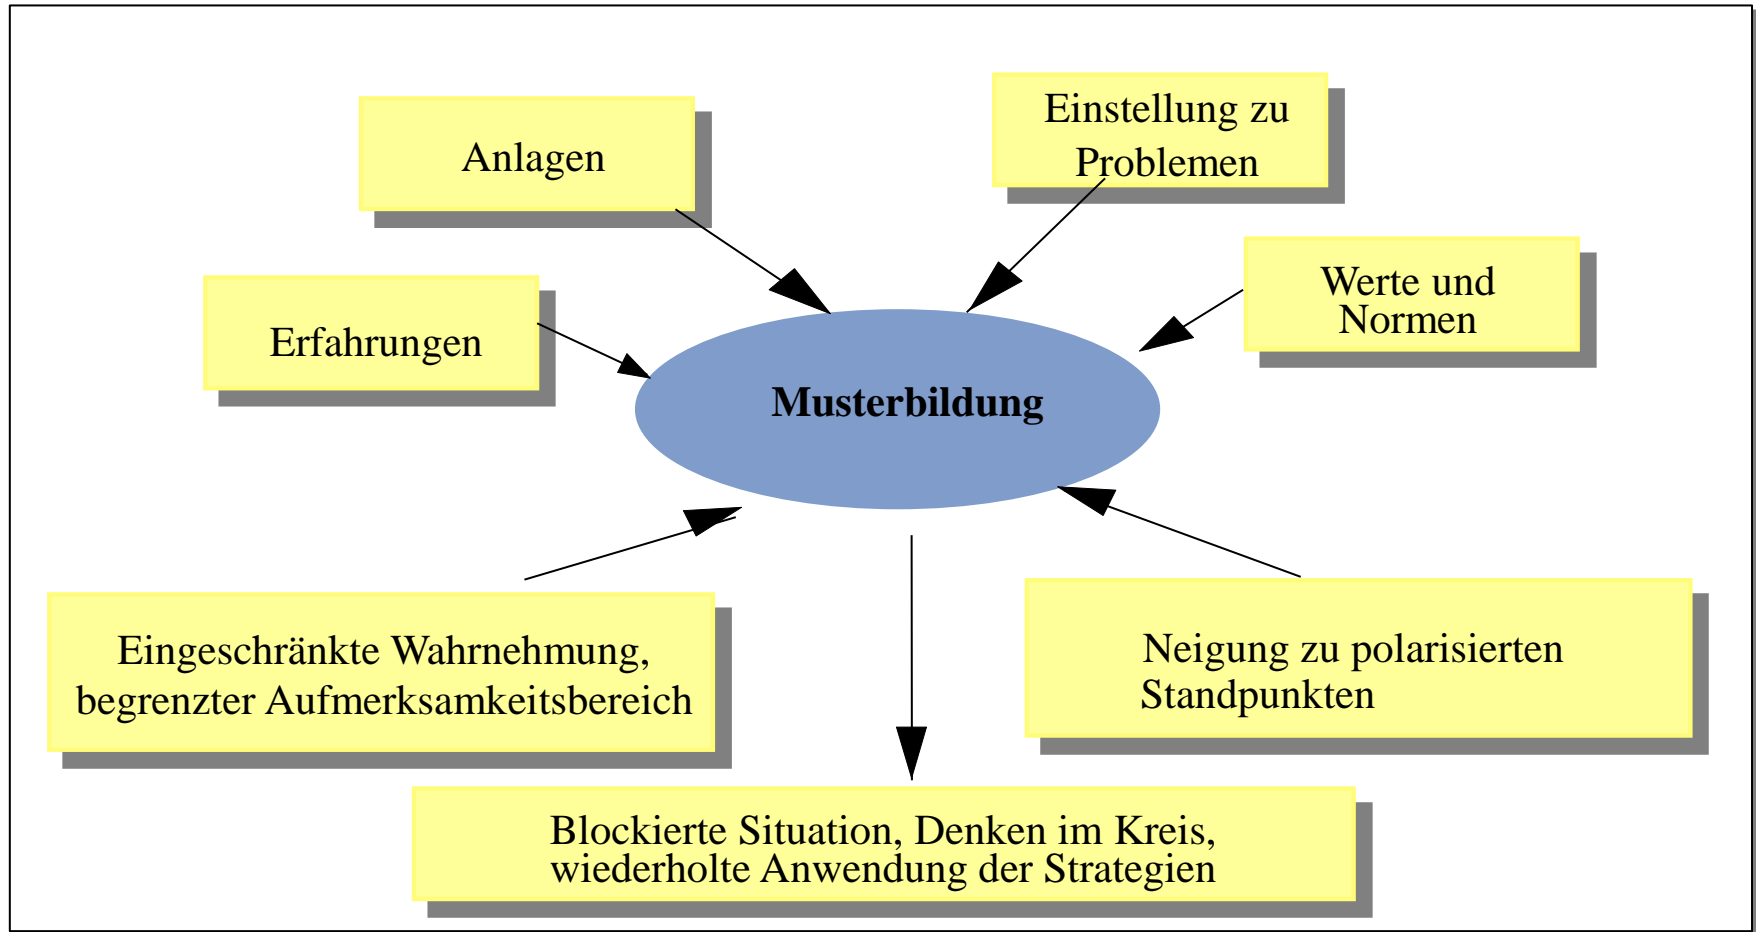

S. 915 Abb. 48

(in Anlehnung an: Czichos, R.: Change-Management, 2. Aufl., München/Basel 1993, S. 274)

Jung, Hans: Personalwirtschaft, 9. Aufl., München 2010.

© Oldenbourg Wissenschaftsverlag

# Organisationsschema zum innovativen Management

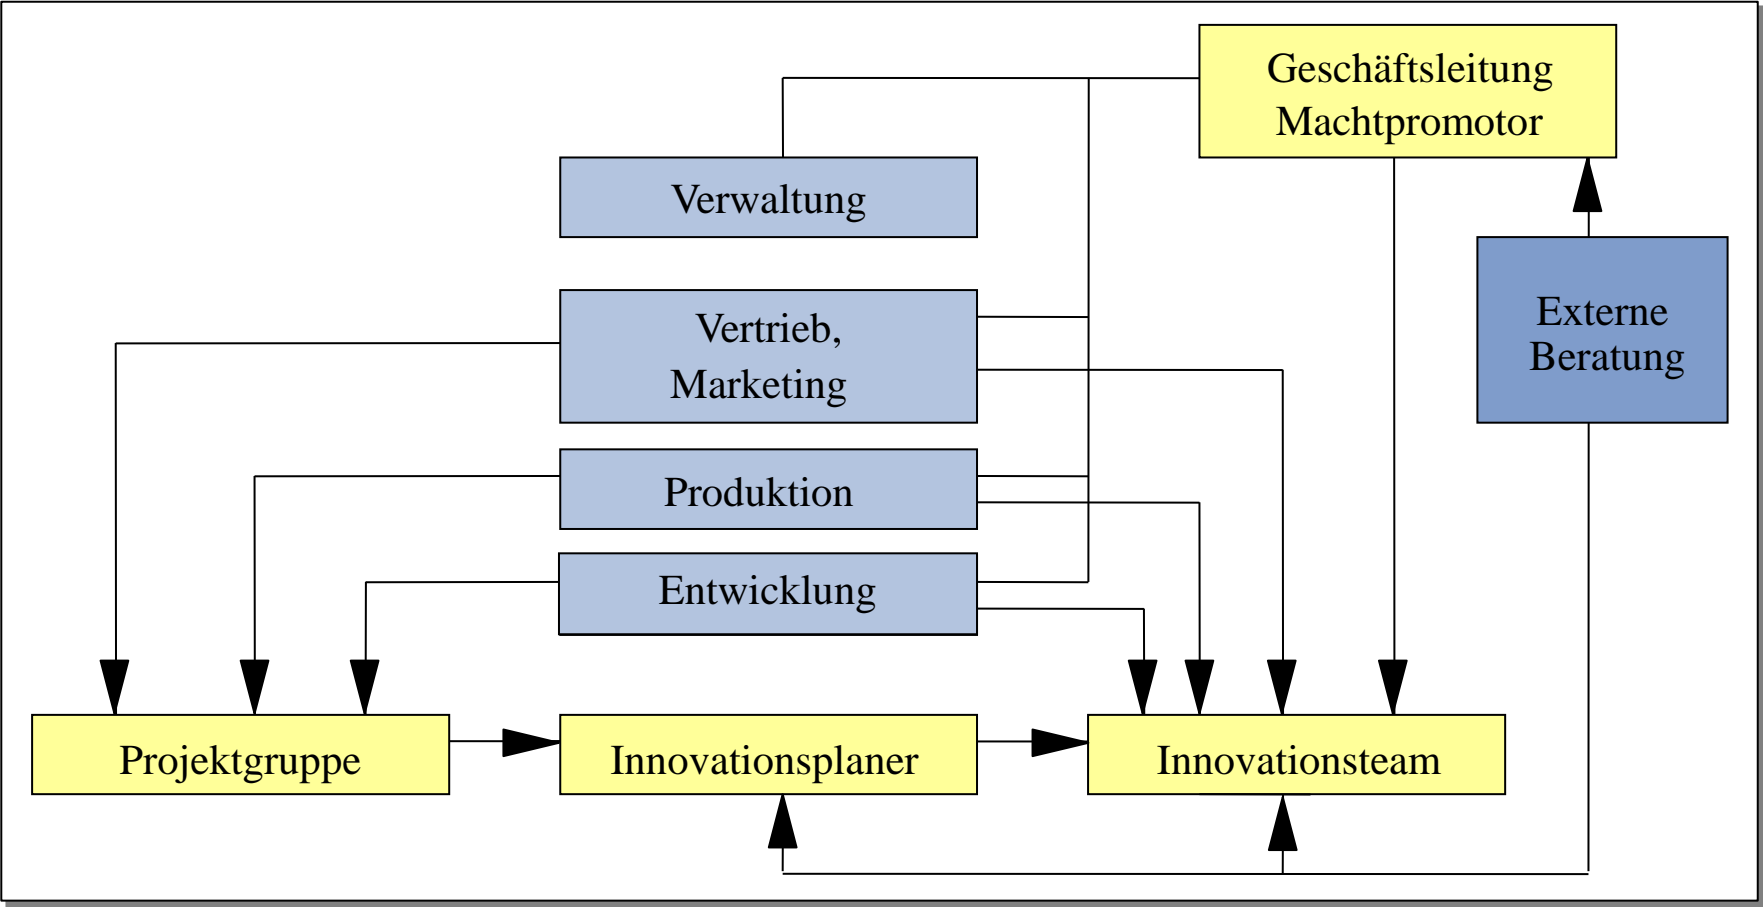

S. 916 Abb. 49

# Bausteine des Wissensmanagements

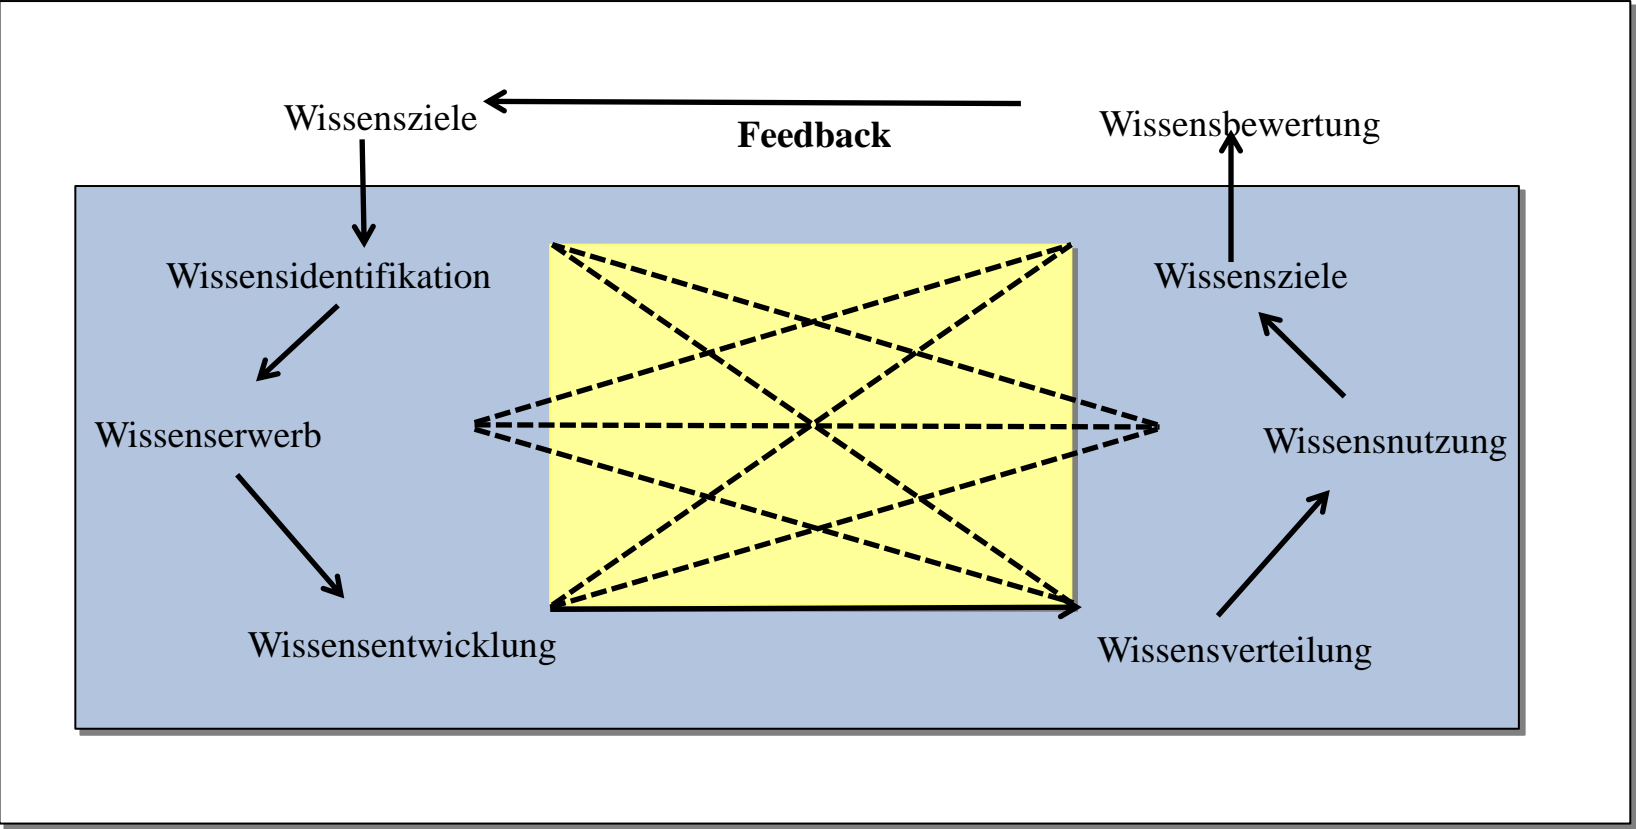

S. 917 Abb. 50

## Vision als treibende Kraft

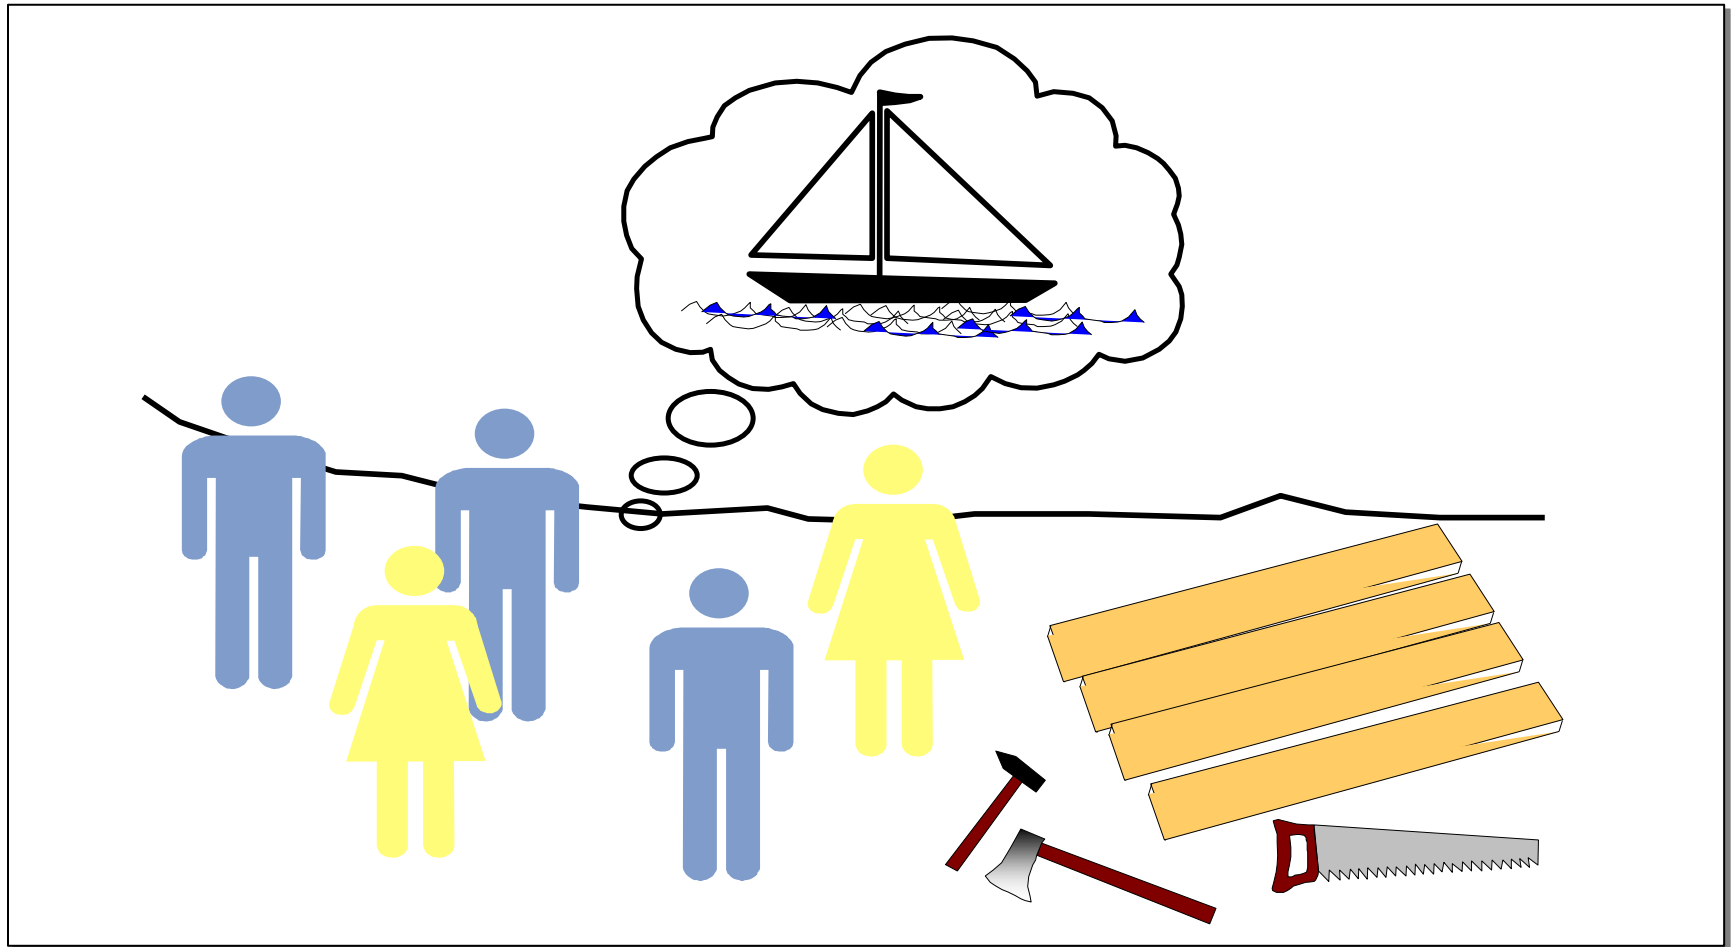

S. 919 Abb. 51

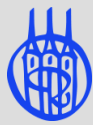

# Die unternehmerische Vision

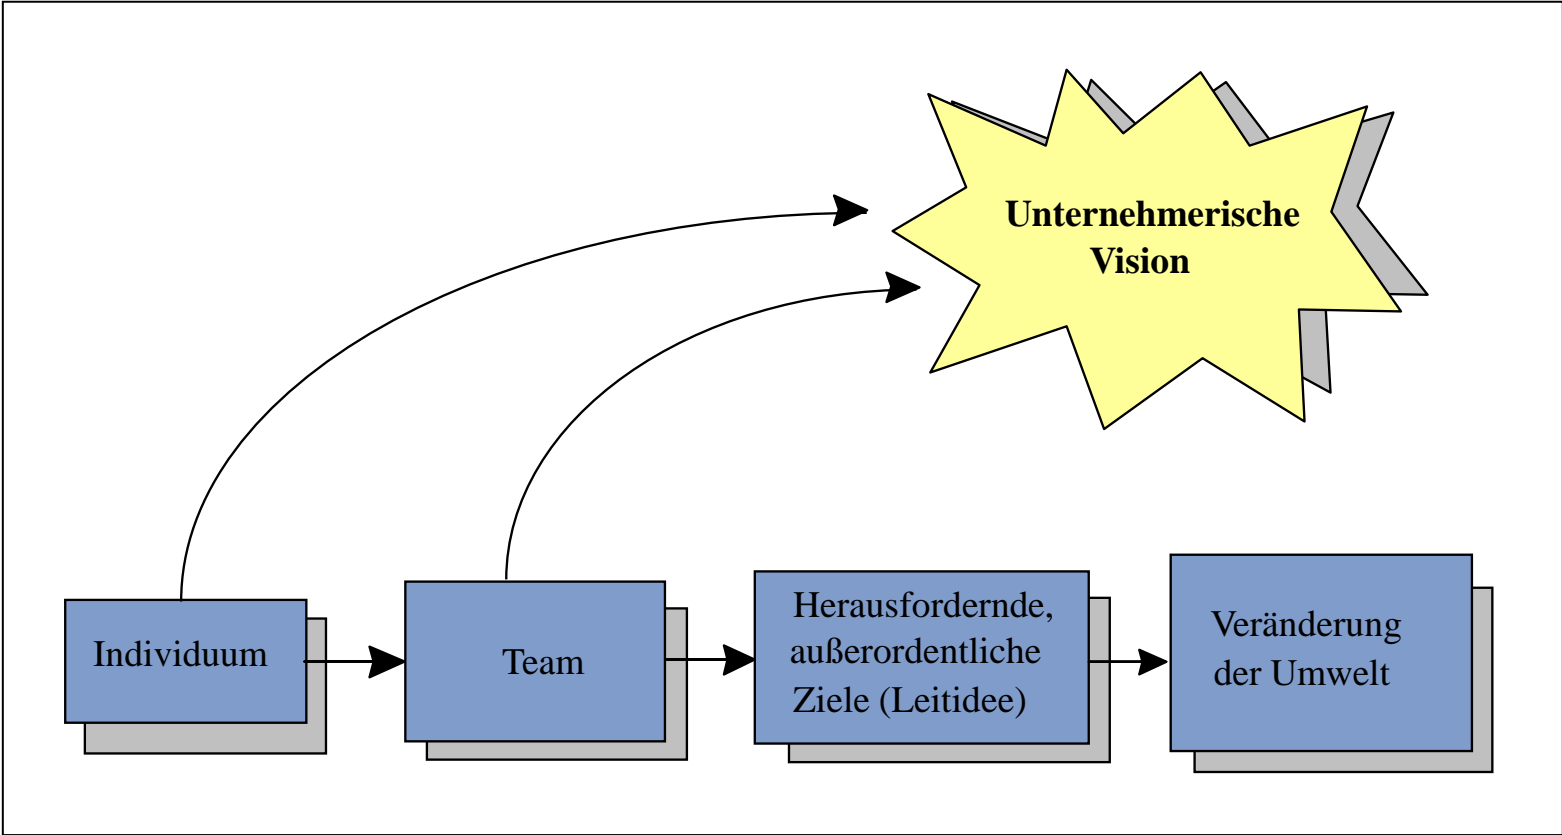

S. 919 Abb. 52  
(in Anlehnung an: Hinterhuber, H./Winter, L.: Visionsfähigkeit für die strategische Führung - Individuum und Gruppe als Träger der Vision.  
in: Gablers Magazin Nr. 1, 1990, S. 29)

## Die Komponenten der Unternehmensvision

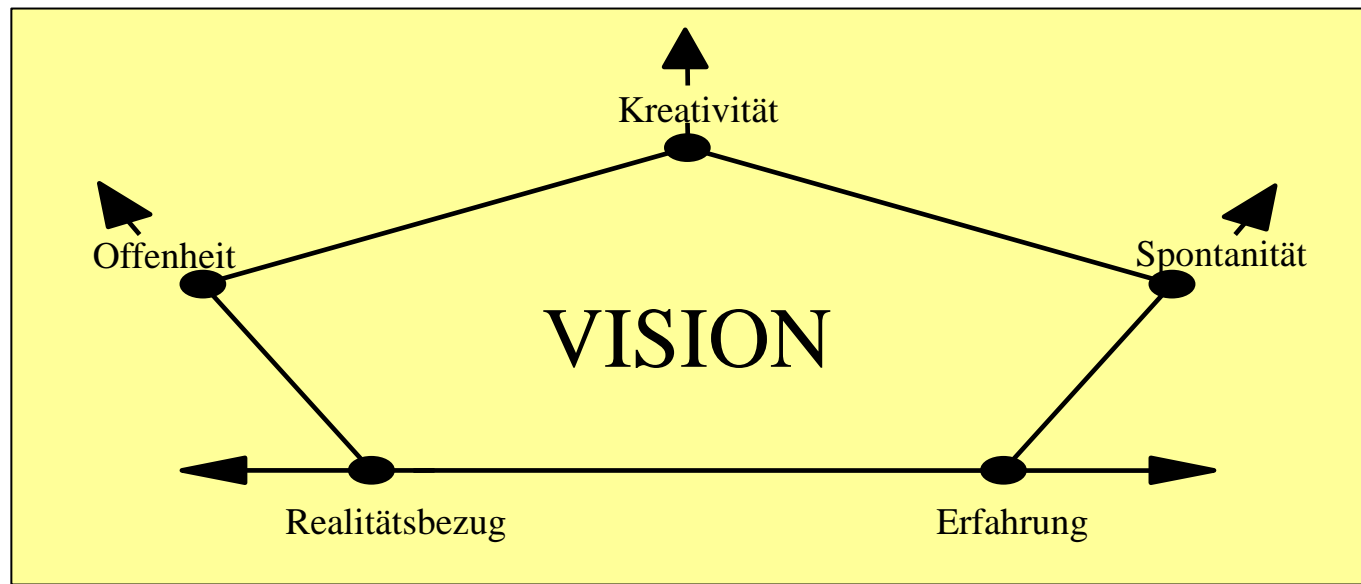

S. 920 Abb. 53

(in Anlehnung an: Bleicher, K.: Das Konzept integriertes Management, Frankfurt/New York 1991, S. 77)

Jung, Hans: Personalwirtschaft, 9. Aufl., München 2010.

© Oldenbourg Wissenschaftsverlag



## Chaos-Management

- **Chaos-Theorie**
- **Ein verändertes Managementprofil**
- **Anwendung der Erkenntnisse**



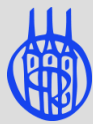

# Das veränderte Managerprofil

| Mechanistische Organisation | Selbstorganisation     |
|-----------------------------|------------------------|
| Autorität                   | Partizipation          |
| Ziele                       | Visionen               |
| Anspruch                    | Gelassenheit           |
| Einseitige Information      | Kommunikation          |
| Führungskraft               | Katalysator/Kultivator |
| Rational-analytisch         | ganzheitlich-vernetzt  |

S. 923 Abb. 54  
(in Anlehnung an : Lutz, C.: Kommunikation. Kern der Selbstorganisation. in: Die lernende Organisation, Hrsg. von Sattelberger, T., Wiesbaden 1991, S. 109)



## Anwendung der Erkenntnisse

- Kundeneinbindung zu Unternehmensveranstaltungen
- Teambildung, in denen Spezialisten integriert werden und Außenkontakte von mehreren wahrgenommen werden
- Mit Profit-Center-ähnlichen, kleinen Einheiten, die sich auf Nischen bzw. bestimmte Kundengruppen konzentrieren, arbeiten.



## Ganzheitliches Management

- Mechanistischer Ansatz
- Ganzheitlich-systemischer Ansatz
- Ganzheitliches Denken
- Umgang mit ganzheitlichen Problemsituationen
- Ganzheitliche Unternehmensführung

# Vergleich Mechanistischer Ansatz: Ganzheitlich-systemischer Ansatz

| Vergleich                                              |                                                                    |
|--------------------------------------------------------|--------------------------------------------------------------------|
| Mechanistischer Ansatz<br>Bisher stand im Vordergrund: | Ganzheitlich-systemischer Ansatz<br>In Zukunft erhalten Bedeutung: |
| Hierarchie                                             | Vernetzungen                                                       |
| Maschinenweltbild                                      | lebendige Organismen                                               |
| Fixe Planung                                           | Visionen                                                           |
| Führungskraft als Macher                               | Führungskraft als Entwickler                                       |
| Hartes Denken, Logik, Denken in Widerspruchsfreiheit   | weiches Denken, Psychologik                                        |
| Organisation                                           | Selbstorganisation                                                 |
| Druck ausüben                                          | Energien freisetzen                                                |
| Männliches Prinzip                                     | Weibliches Prinzip                                                 |
| Objektivität                                           | Subjektivität                                                      |
| Struktur                                               | Prozess                                                            |
| Ursache-Wirkungs-Denken                                | Denken in Wechselwirkungen                                         |
| Richtig/Falsch Beurteilungen                           | Beurteilungen nach Funktionalität                                  |
| Geplanter Wandel                                       | Balance zwischen Verändern und Bewahren                            |

S. 927 Abb. 55



# Zusammenhang zwischen Komplexität und Kompliziertheit

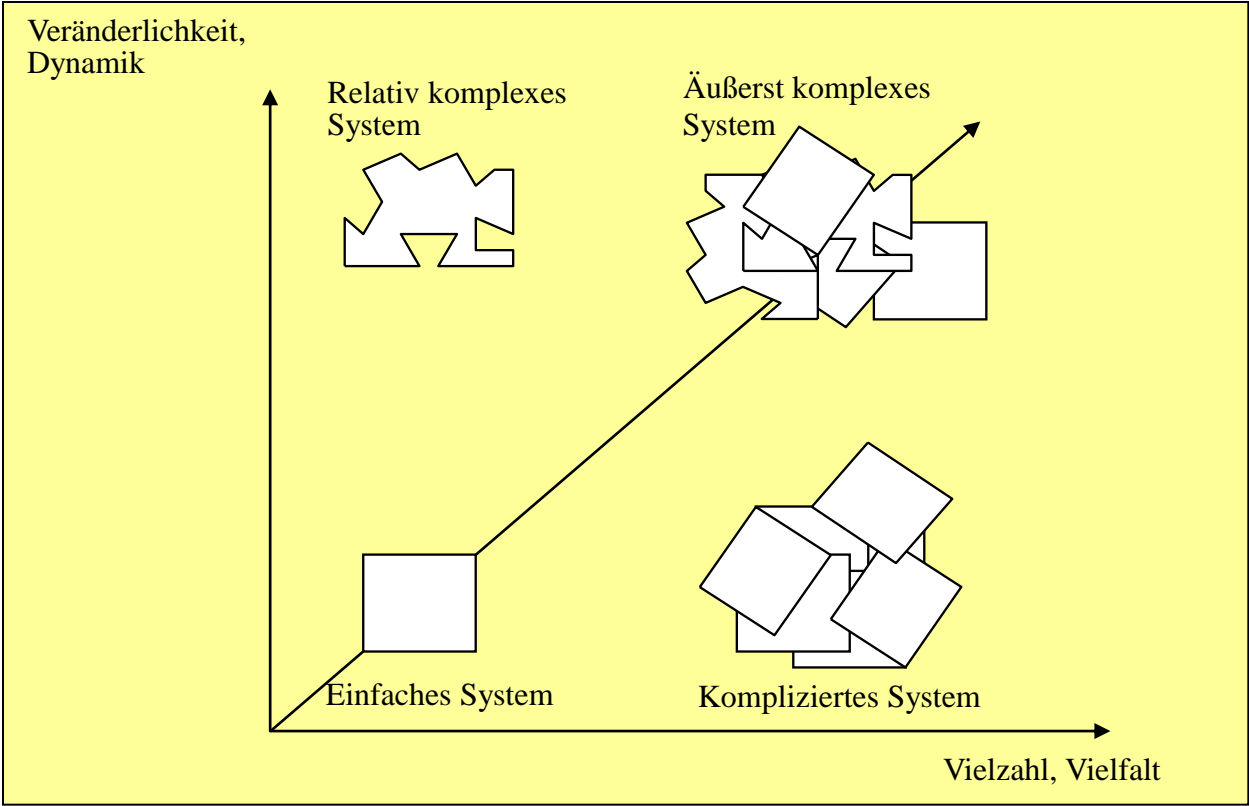

S. 929 Abb. 56  
(in Anlehnung an: Komorek, C.: Methoden und Denkweisen der Unternehmenskybernetik. Bedeutung und Nutzen einer modernen Wissenschaft für die Praxis, Köln 1991, S. 43)

# Systemarten und Problemebenen

| Systemarten<br>Problemebenen                     | Öko-<br>systeme                       | Soziale<br>Systeme                                      | Technische<br>Systeme                      |
|--------------------------------------------------|---------------------------------------|---------------------------------------------------------|--------------------------------------------|
| <b>Sinnebene</b><br>Welchen Sinn hat es?         | Natürlicher<br>Selbstwert             | Veränderliche<br>gesellschaftliche<br>Zwecke            | Spezifische<br>menschliche<br>Absichten    |
| <b>Funktionale Ebene</b><br>Wie funktioniert es? | Natürliche<br>Wirkungs-<br>kreisläufe | Gestaltbare Kreis-<br>läufe menschl.<br>Zusammenwirkens | Zielgerichtet<br>konstruierte<br>Maßnahmen |
| <b>Materielle Ebene</b><br>Woraus besteht es?    | Natürliche<br>Lebewesen<br>und Stoffe | Menschen und<br>"Bauteile"                              | Konstruierte<br>"Bauteile"                 |
|                                                  | <b>Natürliche<br/>Systeme</b>         | <b>Kulturelle Systeme</b>                               |                                            |
|                                                  | <b>Lebensfähige Systeme</b>           |                                                         | <b>Mechanistische<br/>Systeme</b>          |

S. 930 Abb. 57  
(in Anlehnung an: Komorek, C.: Methoden und Denkweisen der Unternehmenskybernetik, Bedeutung und Nutzen einer modernen Wissenschaft für die Praxis, Köln 1991, S. 32)

## Einfache und komplexe Situation im Überblick

|                                         | Einfache Situation                                                                                                                                                                                    | Komplexe Situation                                                                                                                                                                                    |
|-----------------------------------------|-------------------------------------------------------------------------------------------------------------------------------------------------------------------------------------------------------|-------------------------------------------------------------------------------------------------------------------------------------------------------------------------------------------------------|
| <b>Charakteristik</b>                   | <ul style="list-style-type: none"> <li>-Wenige gleichartige Elemente</li> <li>-Geringe Vernetztheit</li> <li>-Wenig Verhaltensalternativen der Elemente</li> <li>-Stabile Wirkungsverläufe</li> </ul> | <ul style="list-style-type: none"> <li>-Viele verschiedene Elemente</li> <li>-Starke Vernetztheit</li> <li>-Viele Verhaltensmöglichkeiten der Elemente</li> <li>-Änderbare Wirkungsabläufe</li> </ul> |
| <b>Erfassbarkeit</b>                    | <ul style="list-style-type: none"> <li>-Vollständig analysierbar</li> <li>-quantifizierbar</li> <li>-Verhalten prognostizierbar</li> </ul>                                                            | <ul style="list-style-type: none"> <li>-Beschränkt analysierbar,</li> <li>-Beschränkt quantifizierbar</li> <li>-Verhaltensmuster erkennbar</li> </ul>                                                 |
| <b>Geeigneter Modellierungsansatz</b>   | <ul style="list-style-type: none"> <li>-Vorbild Maschine</li> <li>-Systemtyp trivial</li> </ul>                                                                                                       | <ul style="list-style-type: none"> <li>-Vorbild: Ökosystem</li> <li>-Systemtyp nicht trivial</li> </ul>                                                                                               |
| <b>Geeignete Denkweise</b>              | <ul style="list-style-type: none"> <li>-Kausalanalytisches Denken</li> </ul>                                                                                                                          | <ul style="list-style-type: none"> <li>-Ganzheitliches Denken</li> </ul>                                                                                                                              |
| <b>Geeignete Problemlösungsmethoden</b> | <ul style="list-style-type: none"> <li>-Exakte quantitative Methoden,</li> <li>-Algorithmen</li> </ul>                                                                                                | <ul style="list-style-type: none"> <li>-Unexakte qualitative Methoden</li> <li>-Heuristiken</li> </ul>                                                                                                |
| <b>Faktische Beeinflussbarkeit</b>      | <ul style="list-style-type: none"> <li>-Konstruierbar beherrschbar mit Restrisiko</li> </ul>                                                                                                          | <ul style="list-style-type: none"> <li>Beschränkt gestaltbar u. lenkbar „kultivierbar“</li> </ul>                                                                                                     |

S. 934 Abb. 58

(in Anlehnung an: Ulrich, H./Probst, G. J. B.: Anleitung zum ganzheitlichen Denken und Handeln, 3. Auflage, Bern/Stuttgart 1991, S. 110)

Jung, Hans: Personalwirtschaft, 9. Aufl., München 2010.

© Oldenbourg Wissenschaftsverlag

## **Merkmale des „Ganzheitlichen Managers“**

### **Der Manager als ganzheitlich Denkender**

- gewährt der Phase der Problembestimmung viel Zeit und Energie,
- bestimmt die Zieldefinition, überprüft die Richtigkeit der Ziele, ihre Rationalität und die wichtigen Einflussgrößen,
- erfasst die Situation in ihren Zusammenhängen, als Netzwerk und versucht, komplexe Probleme in ihrer Vernetztheit zu erkennen und zu analysieren,
- beachtet, dass wesentliche Teile verloren gehen, wenn man das System zerlegt, aber auch, dass aus dem vernetzten Ganzen Eigenschaften entstehen, die nicht in den Teilen zu finden sind,
- erkennt und erforscht eine Vielzahl von Einflüssen und gleichgerichteten sowie entgegengerichteten Wirkungsverläufen,
- bezieht die Dynamik in die Modelle mit ein und akzeptiert so das Veränderliche und Veränderbare,
- hält zukünftige, mögliche Verhaltens- und Situationsmuster in Szenarien fest und interpretiert sie ins Netzwerk und erhält durch geistiges und technisches Simulieren ein Gefühl für die Verhaltensweisen und die Evolution eines Systems,
- legt Indikatoren zur Überwachung der Entwicklungen von Problemsituationen und zum Erkennen von Chancen im Netzwerk fest (Früherkennung),
- analysiert die Wirksamkeiten möglicher Lenkungseingriffe und simuliert sie gedanklich oder technisch im Netzwerk,
- versucht ständig, Veränderungen in der Umwelt und in Systemen kritisch zu überprüfen (strategisches Controlling),
- versucht unvoreingenommen, kreativ und heuristisch Lösungen und Handlungsmöglichkeiten zu finden und beurteilt die eigenen Strategien und Handlungen nach ihrer Systemhaftigkeit, nach Kombinationsmöglichkeiten und Synergien,
- fördert die Autonomie der Systeme und Teilsysteme zur Gestaltung und Erhaltung von selbstorganisierenden, flexiblen Einheiten und gestaltet Problemlösungsprozesse möglichst so, dass sie selbständig ablaufen und sich anpassen können,
- strebt nach lebens-, lern- und entwicklungsfähigen Systemen, baut Lernbarrieren ab, damit Traditionen verlernt werden können und macht durch Teamarbeit und Workshops Lernen und Lerninhalte bewusst,
- hilft Informationen zu diffundieren und kommunikativ zu sein.

S. 935 Abb. 59

**Jung, Hans: Personalwirtschaft, 9. Aufl., München 2010.**

**© Oldenbourg Wissenschaftsverlag**



## 4. Personalwirtschaft und Controlling

- 4.1 Der Controlling- Begriff
- 4.2 Der Begriff Personalcontrolling
- 4.3 Ziele, Funktionen und Aufgaben des Personalcontrollings
- 4.4 Bestandteile und Instrumente des Personalcontrollings
- 4.5 Organisatorische Einordnung und Implementierung des Personalcontrollings

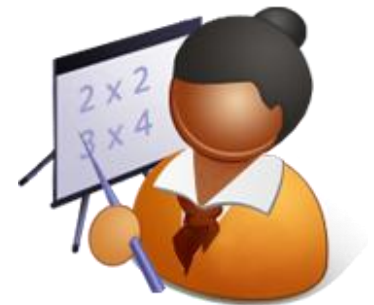



## Controlling Definitionen

|                   |                                                                                                                                                                                                                                                                                                                                                                 |
|-------------------|-----------------------------------------------------------------------------------------------------------------------------------------------------------------------------------------------------------------------------------------------------------------------------------------------------------------------------------------------------------------|
| <b>Horváth</b>    | Controlling..... „als Subsystem der Führung, das Planung und Kontrolle sowie Informationsversorgung systembildend und systemkoppelnd ergebniszielorientiert koordiniert und so die Adaptation und Koordination des Gesamtsystems unterstützt.“ Es stellt eine „Unterstützung der Führung dar.“                                                                  |
| <b>Reichmann:</b> | Controlling..... „die zielbezogene Unterstützung von Führungsaufgaben, die der systemgestützten Informationsbeschaffung und Informationsverarbeitung zur Planerstellung, Koordination und Kontrolle dient; es ist eine Rechnungswesen- und vorsystemgestützte Systematik zur Verbesserung der Entscheidungsqualität auf allen Führungsstufen der Unternehmung.“ |
| <b>Deyhle:</b>    | „Der Controller sorgt dafür, dass ein Apparat existiert, der darauf hinwirkt, dass die Unternehmung Gewinne erzielt.“                                                                                                                                                                                                                                           |
| <b>Preißler:</b>  | Controlling ..... „ein funktionsübergreifendes Steuerungsinstrument, das den unternehmerischen Entscheidungs- und Steuerungsprozess durch zielgerichtete Informationserarbeitung und -verarbeitung unterstützt.“                                                                                                                                                |



## Controlling als Arbeitsbegriff

### Kernelemente sind:

- Funktionsübergreifendes Steuerungsinstrument zur Unterstützung der Unternehmensführung beim unternehmerischen Entscheidungsprozeß und ein Früherkennungssystem.
- Ein ständiger Lernprozess für viele Bereiche der Unternehmung durch institutionalisierte, permanente SOLL-IST-Vergleiche und den daraus resultierenden Abweichungsanalysen und initiierten Rückkoppelungsprozessen.
- Ein auf Informationserarbeitung und -verarbeitung aufbauendes System, das Schwachstellen im Unternehmen durch rechtzeitiges Erkennen der Ursachen verhindern soll.
- Ein auf Dauer vorgesehenes Führungsinstrument, das fest in der Unternehmenshierarchie verankert ist und nicht als vorübergehende Zeiterscheinung anzusehen ist.
- Ein System, das über Ziele führt und über Selbstkontrolle Zielerreichung realisieren will.



## **Aufgaben des Controlling**

- Einführung und regelmäßige Kontrolle einer Unternehmensstrategie
- Steigerung der betrieblichen Operationalisierung und die Durchsetzung der daraus resultierenden Unternehmensziele
- Abstimmung von Planungs- und Steuerungsprozessen für das Unternehmen
- Erzeugung hoher Reaktionsgeschwindigkeiten bei Veränderungen sowie Entwicklung von Gegensteuerungsmaßnahmen
- Weiterleiten von bedarfsgerechten Informationen
- Entscheidungsfindung mittels betriebswirtschaftlicher Methoden und Kenntnisse



# Zusammenhang zwischen Kontrolle und Controlling

|                                                                                                                    |                                   |                                |                         |
|--------------------------------------------------------------------------------------------------------------------|-----------------------------------|--------------------------------|-------------------------|
| Festlegung des Kontrollfeldes<br>Ermittlung von Soll- Größen<br>Ermittlung von Ist- Größen<br>Soll- Ist- Vergleich | Traditioneller<br>Kontrollbegriff | Erweiterter<br>Kontrollbegriff | Controlling-<br>Begriff |
| Analyse der Abweichungsvorschläge                                                                                  |                                   |                                |                         |
| Vorschläge für Kontrollmaßnahmen                                                                                   |                                   |                                |                         |
| Korrekturrentscheidung                                                                                             |                                   |                                |                         |

S. 941 Abb. 60  
(in Anlehnung an: Jung, H.: Allg. Betriebswirtschaftslehre, 12. Aufl., München/Wien 2010, S 1163)



# Controllingziele in der industriellen Unternehmung

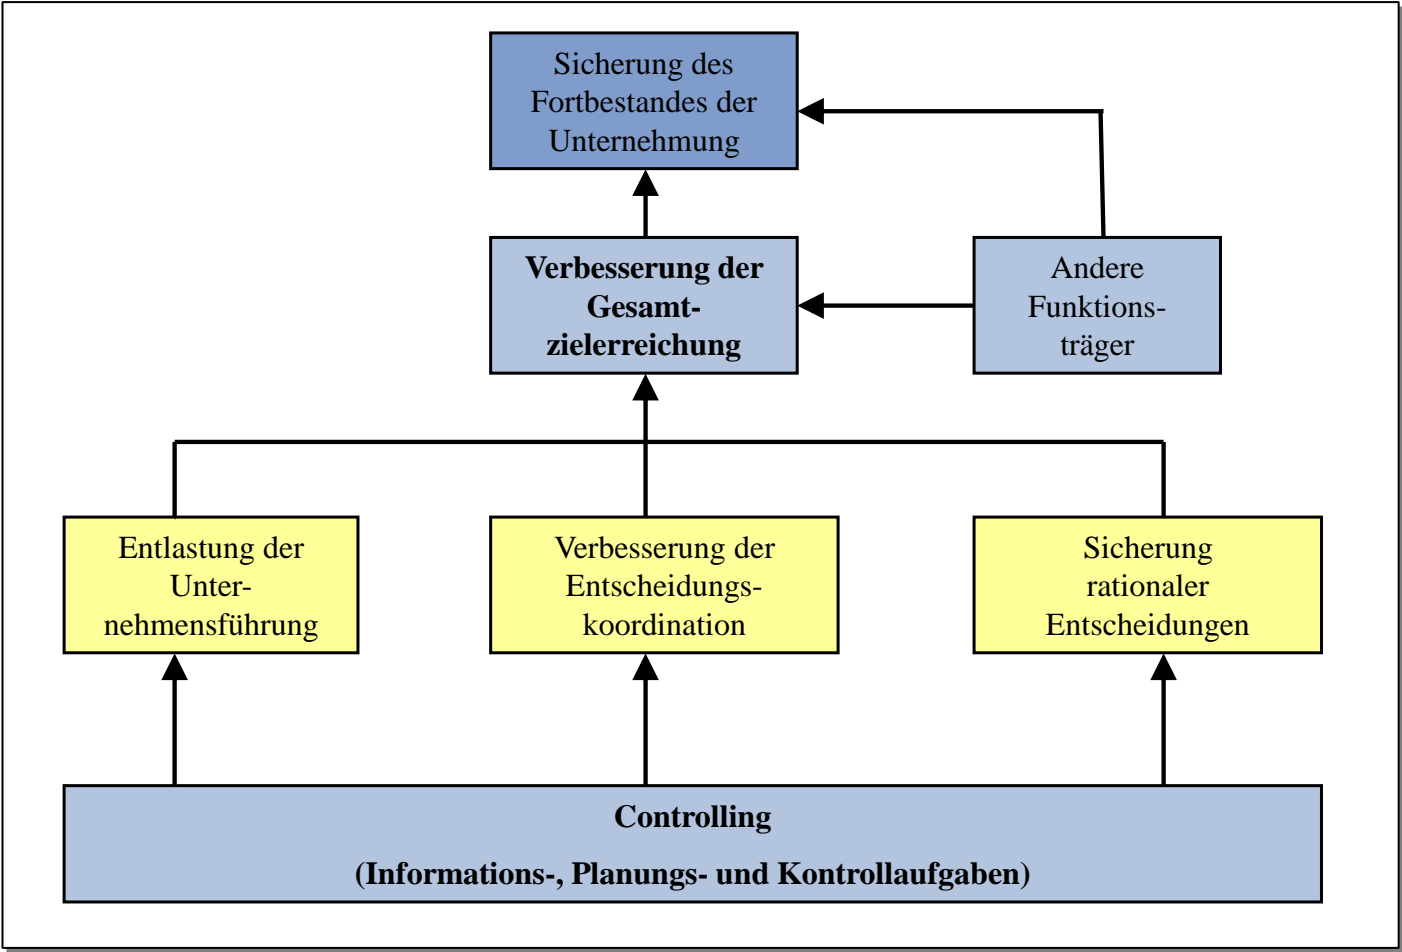

S. 942 Abb. 61



## Warum Personal-Controlling?

### **Personalcontrolling:**

- fokussiert die Personalarbeit, das menschliche Potenzial, Leistungs- sowie Arbeitsverhalten und Leistung- bzw. Arbeitsergebnisse
- Konzentration auf arbeitsrelevante Aspekte und auf Arbeitsrollen aller Mitarbeit
- Erfassung von Ausschnitten der Beziehung „Mensch-Arbeit“
- Personalcontrolling- Philosophie entscheidet z.B.: inwieweit neben ökonomischen auch soziale Aspekte berücksichtigt werden.



## Strategisches und operatives Controlling

### Strategisches Controlling

- Der strategisch denkende Controller muss sich mit Prozessen die die langfristige Entwicklung des Unternehmen beeinflussen könnte so frühzeitig beschäftigen, dass die Unternehmung noch handeln kann.
- Versäumnisse sind kaum noch wirtschaftlich korrigierbar, d.h. Ursachen möglicher Abweichungen müssen frühzeitig lokalisiert und erkannt werden, um sie zu bewältigen

### Operatives Controlling

- Als Mehrjährige Planung und Mittelfristplanung hat sie ein Planungshorizont von bis zu 5 Jahren
- Sie plant die Realisierung der Maßnahmen die im strategischen Controlling festgelegten Unternehmensstrategien.





# Aufgaben des strategischen und operativen Personalcontrolling

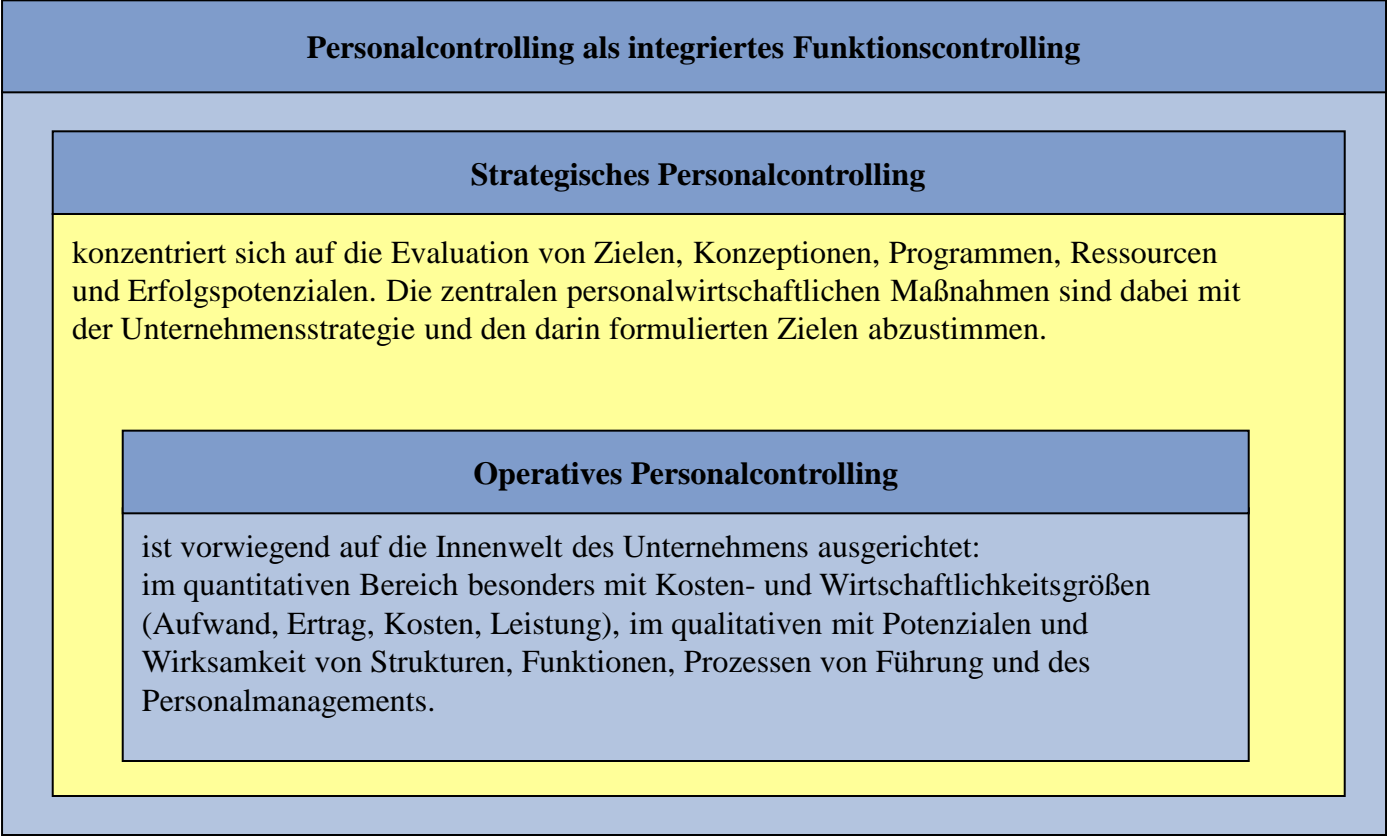

S. 946 Abb. 62



## Ziele des Personal-Controlling

- Die umfassende Unterstützung der Personalwirtschaft bzw. Personalplanung
- Sicherstellung und Verbesserung der Informationsversorgung im Personalwesen
- Die Sicherung und Verbesserung der Koordination im Personalwesen
- Erhöhung der Flexibilität
- Adäquate Informationsversorgung der personalwirtschaftlichen Handlungsträger in der Unternehmung



## Funktionen des Personal-Controlling

### **- Integrationsfunktion:**

Die Voraussetzung der Eingliederung der Personalfunktion in die gesamtplanerischen Maßnahmen der Geschäftsleitung schafft das Personalcontrolling.

### **- Koordinationsfunktion:**

Personalcontrolling führt zu einer Koordination der teilweise nebeneinander her laufenden Einzel- und Teilpläne im Personalwesen.

### **- Früherkennungsfunktion:**

Das im Personalwesen immer wieder geforderte Agieren statt Reagieren kann durch Personal-Controlling realisiert werden.



## Aufgaben des Personalcontrolling

- (1) Informationsaufgabe
- (2) Dienstleistungs- und Serviceaufgabe
- (3) Aufgaben innerhalb strategischer und operativer Personalarbeit
- (4) Personalwirtschaftliche Kontrollaufgaben



## Soll-ist-Vergleich

| Vergleichsformen    | Bedeutung                                                                                                                                                                                                     |
|---------------------|---------------------------------------------------------------------------------------------------------------------------------------------------------------------------------------------------------------|
| Ist-Ist-Vergleich   | Ex-post-Vergleich realisierter Größen (z.B. Vergleich eigener personalwirtschaftlicher Daten mit denen anderer Unternehmungen, Betriebsvergleich)                                                             |
| Soll-Soll-Vergleich | Ex-ante-Überprüfung der Konsistenz der durch die Planung gesetzten Soll-Größen                                                                                                                                |
| Wird-Wird-Vergleich | Prüfung der Konsistenz prognostizierter Größen (Entwicklung und Wirkungsprognose)                                                                                                                             |
| Soll-Wird-Vergleich | Im Wesentlichen vorkoppelnde Planfortschrittskontrollen. Inwieweit eine bestimmte Maßnahme geeignet ist, die gesetzten Ziele zu erreichen, wird schon schrittweise während der Planrealisierung kontrolliert. |
| Wird-Ist-Vergleich  | Prämissenkontrolle; Prüfung, ob und inwieweit Planungsgrundlagen aktuell noch gegeben sind ( ex-ante-Charakter).                                                                                              |

## Die drei Ebenen des Personalcontrolling

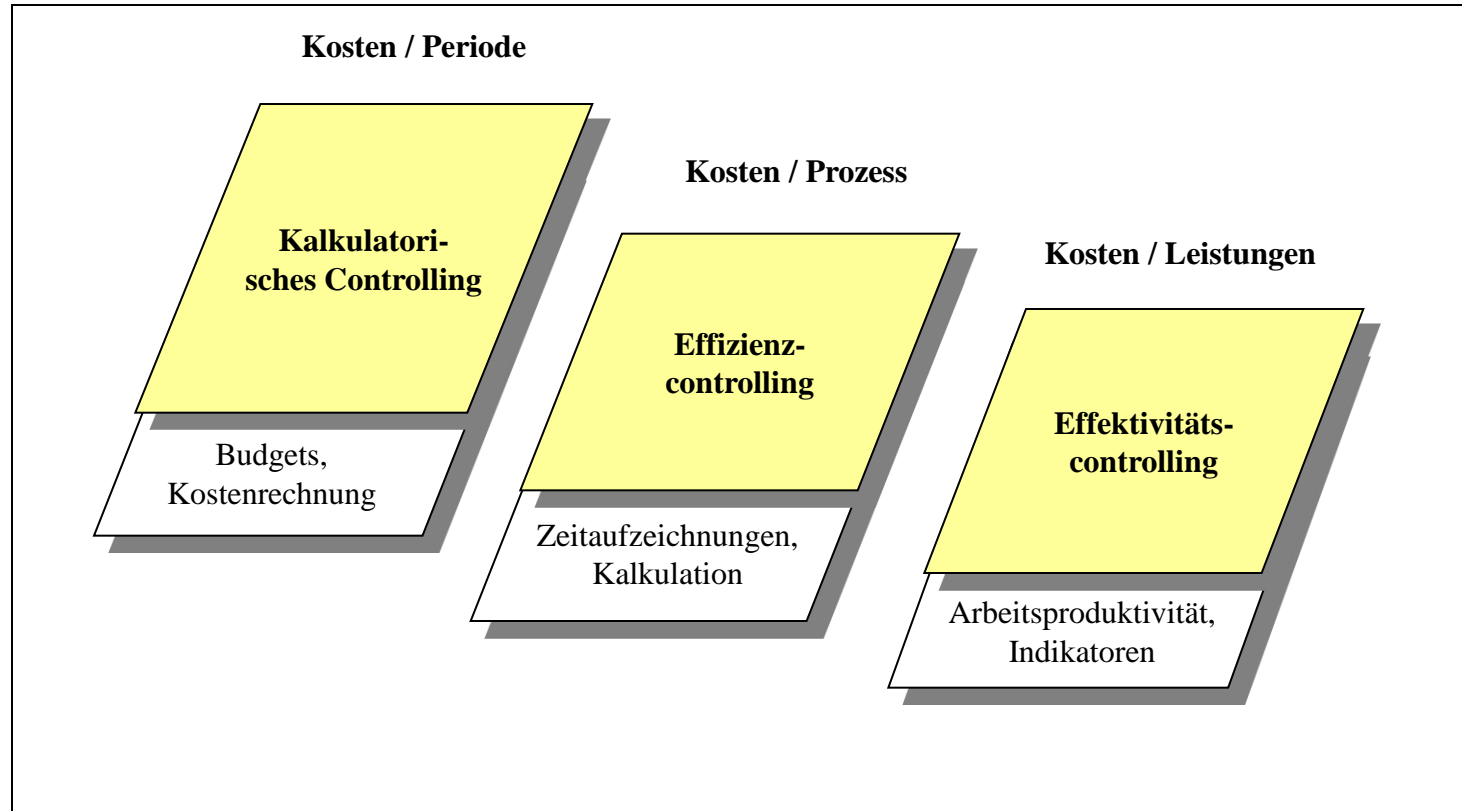

S. 954 Abb. 64

Jung, Hans: Personalwirtschaft, 9. Aufl., München 2010.

© Oldenbourg Wissenschaftsverlag

## Wichtige Personalcontrollinginstrumente

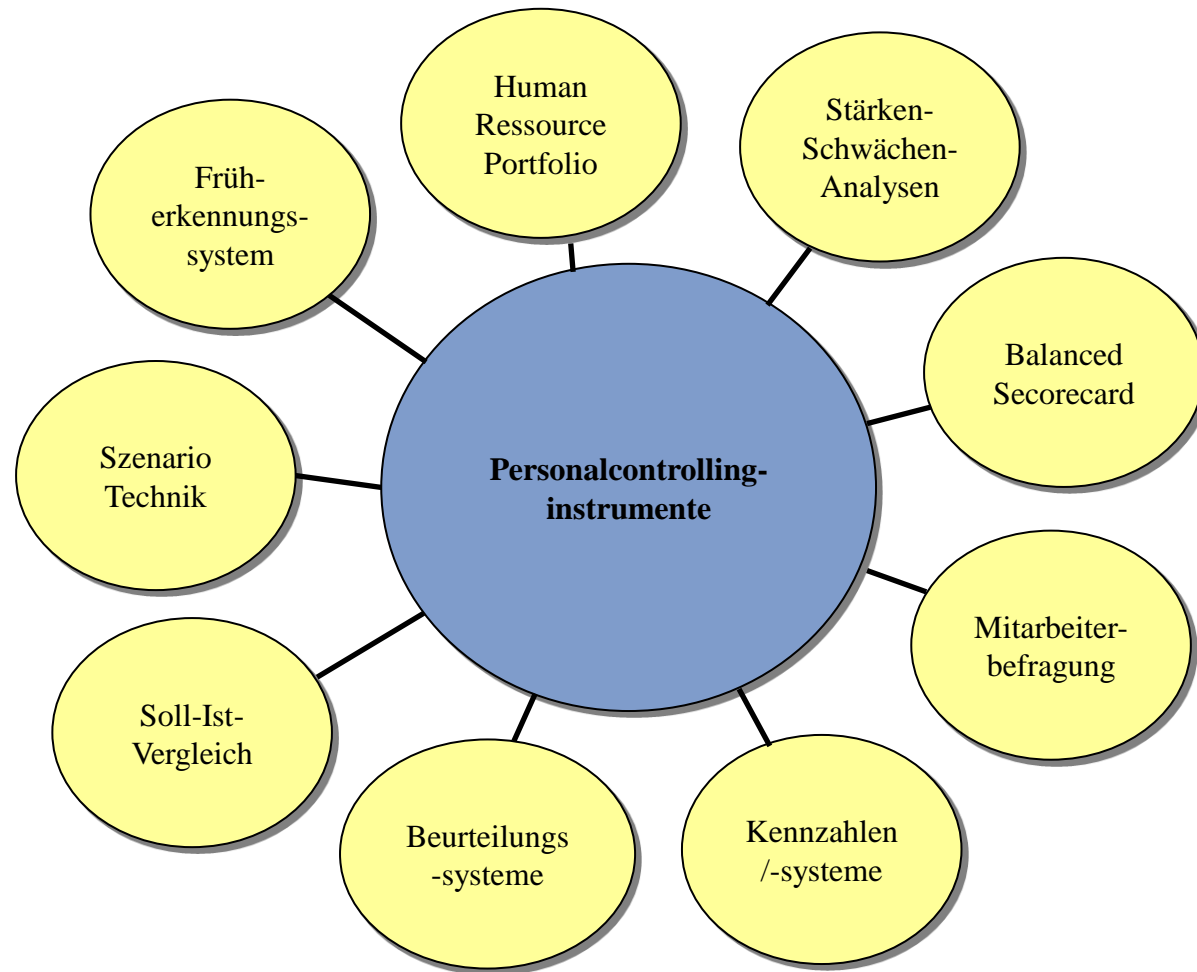

S. 955 Abb. 65

Jung, Hans: Personalwirtschaft, 9. Aufl., München 2010.

© Oldenbourg Wissenschaftsverlag

## **Controlling-Funktionen der Personalbeurteilung**

| <b>Auf Mitarbeiterebene</b>                                                                                                                                                                                                  | <b>Für Funktionen<br/>der Personalwirtschaft</b>                                                                                                                                                                                     | <b>Für<br/>integrative Personalpolitik</b>                                                                                                                                                                                                          |
|------------------------------------------------------------------------------------------------------------------------------------------------------------------------------------------------------------------------------|--------------------------------------------------------------------------------------------------------------------------------------------------------------------------------------------------------------------------------------|-----------------------------------------------------------------------------------------------------------------------------------------------------------------------------------------------------------------------------------------------------|
| <ol style="list-style-type: none"><li>1. Ermöglicht Beurteilern Orientierung durch ein Feedback</li><li>2. Mitarbeiter erhalten Informationen über ihre gegenwärtige Leistung</li><li>3. Beseitigung von Defiziten</li></ol> | <ol style="list-style-type: none"><li>1. Beurteilungsinfos für Personaleinsatz- bzw. Entwicklungsplanung</li><li>2. Planbare Qualifizierungsmaßnahmen</li><li>3. Integration von Beurteilungssystemen in Entlohnungssystem</li></ol> | <ol style="list-style-type: none"><li>1. Entwicklung personalpolitischer Maßnahmen</li><li>2. Analyse ergebnis- und verhaltensorientierter Wirkungen der Personalbeschaffung</li><li>3. Analyse von Veränderungen der Arbeitsorganisation</li></ol> |





## Personalbeurteilung/Leistungsbeurteilung

### Personalbeurteilung hat zwei Hauptziele:

- ✓ **Evaluation der Leistung des Mitarbeiters**

- Möglichkeit Personen miteinander vergleichbar zu machen  
bzw. an Standards zu messen

- ✓ **Ansätze für künftige Personalentwicklungsmaßnahmen aufzeigen**

- Die Evaluation findet dabei auch im Sinne einer Kontrolle statt,  
die sowohl ein negatives als auch positives Feedback umfasst

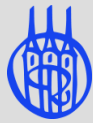

# Human Ressource Portfolio

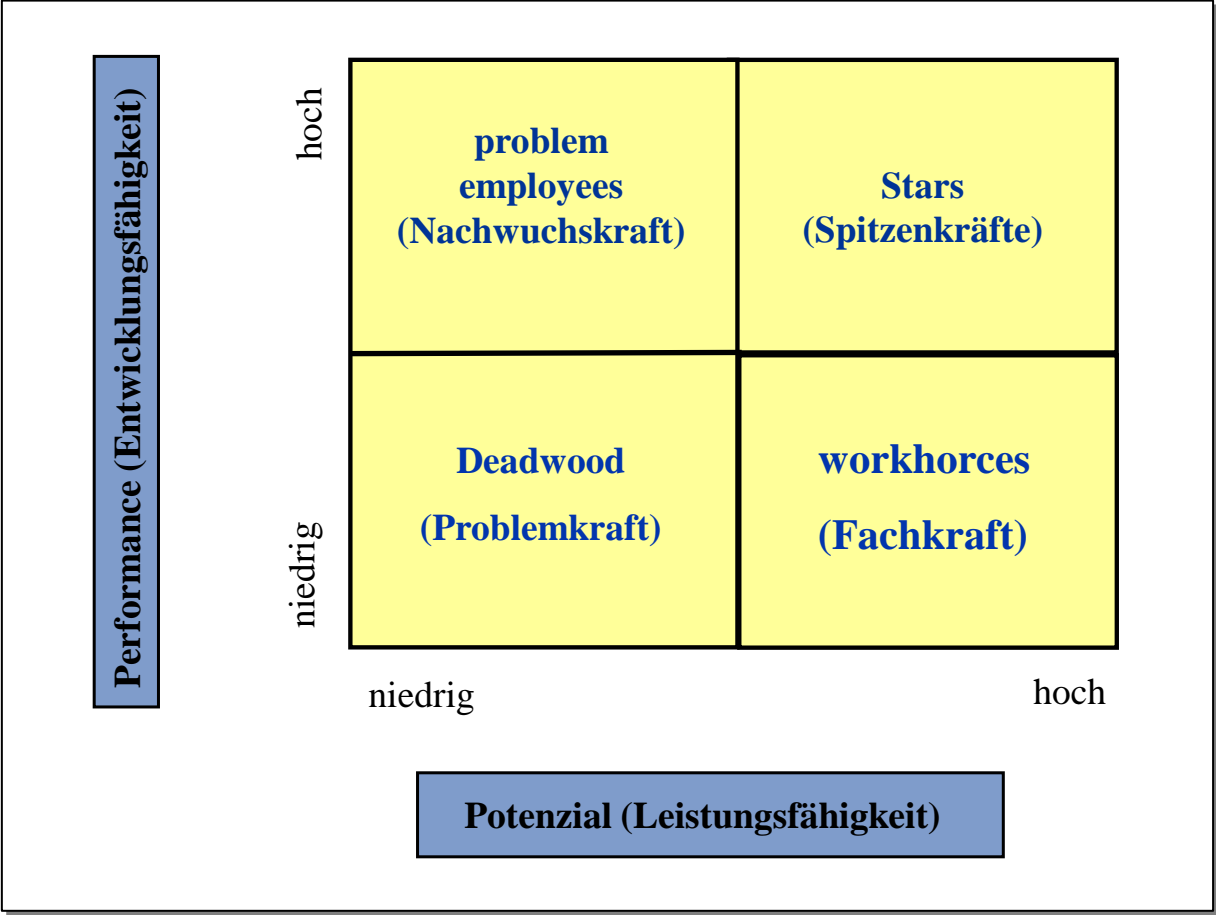

S. 960 Abb. 66

# Vor- und Nachteile des Personal-Portfolios

| Portfolio-Analyse im Personalbereich                                                                                                                                                                                                                                                                                                                                                                                                                                      |                                                                                                                                                                                                                                                                                                                                                                                                                                                                                                                                                                                                     |
|---------------------------------------------------------------------------------------------------------------------------------------------------------------------------------------------------------------------------------------------------------------------------------------------------------------------------------------------------------------------------------------------------------------------------------------------------------------------------|-----------------------------------------------------------------------------------------------------------------------------------------------------------------------------------------------------------------------------------------------------------------------------------------------------------------------------------------------------------------------------------------------------------------------------------------------------------------------------------------------------------------------------------------------------------------------------------------------------|
| Vorteile                                                                                                                                                                                                                                                                                                                                                                                                                                                                  | Nachteile                                                                                                                                                                                                                                                                                                                                                                                                                                                                                                                                                                                           |
| <ul style="list-style-type: none"> <li>– Die Mitarbeiter des Unternehmens können aus einem strategischen Gesamtzusammenhang heraus betrachtet werden.</li> <li>– Personal-Portfolios können als Beurteilungsinstrument verwendet werden.</li> <li>– Personal-Portfolios bieten dem oft heterogen zusammengesetzten Team der Geschäftsleitung (Techniker, Juristen, Kaufleute) durch einfache Handhabbarkeit und Visualisierung eine gute Diskussionsgrundlage.</li> </ul> | <ul style="list-style-type: none"> <li>– Für eine ganzheitliche Mitarbeiterbeurteilung reichen zwei Dimensionen nicht aus. Mitarbeiter werden „schablonisiert“ und wie Produkt-Markt-Kombinationen behandelt.</li> <li>– Eine klare Zuordnung von Mitarbeitern in eine der vorgegebenen Kategorien ist nicht immer möglich (z.B. weisen viele Mitarbeiter nicht über die gesamte Beurteilungsperiode einen konstanten Leistungsgrad auf).</li> <li>– Die Durchführung aufschlussreicher Konkurrenzvergleiche scheitert meist am Informationsmangel bezüglich vergleichbarer Unternehmen.</li> </ul> |

S. 962 Abb. 67

## Früherkennungssysteme – im strategisch orientierten Personalcontrolling

- Die Notwendigkeit von Informationen über zukünftige Personal-Ressourcen ergibt sich, wenn es gilt, mögliche Instabilitäten der Unternehmensumwelt auszugleichen
- Technologien, Märkte, Produkte, aber auch die Werte und Einstellungen der Mitarbeiter unterliegen einem schnellen Wandel.
- Daher müssen die Beobachtungsfelder eines Früherkennungssystems alle Bereiche umfassen, die Einfluss auf die Personalarbeit haben

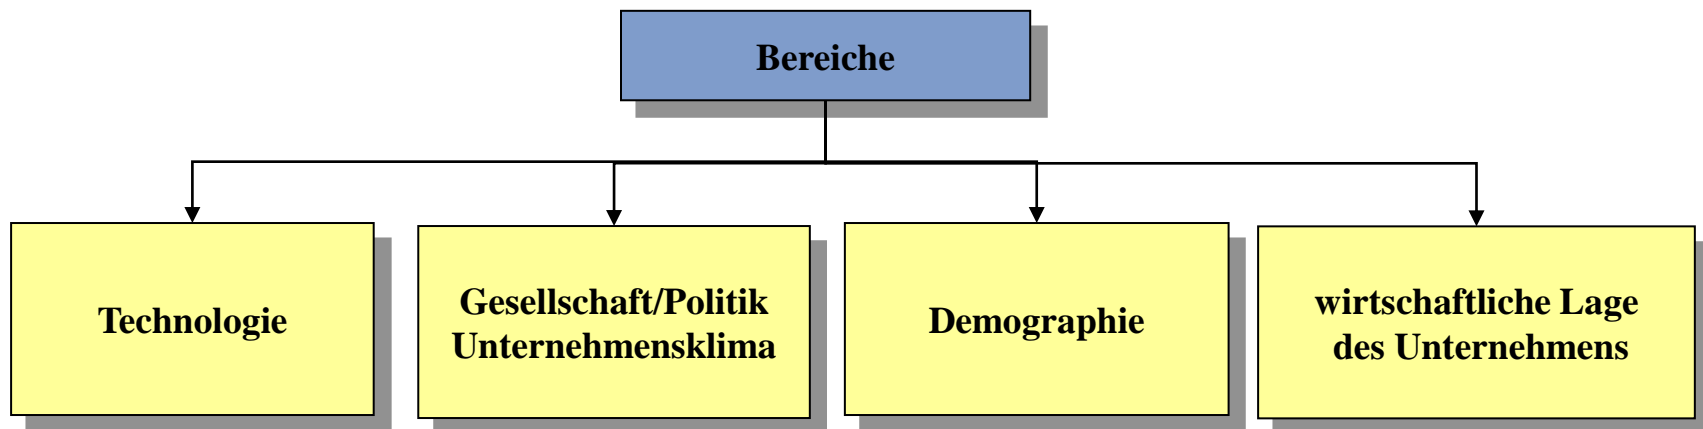

## Dimensionen der Balanced Scorecard

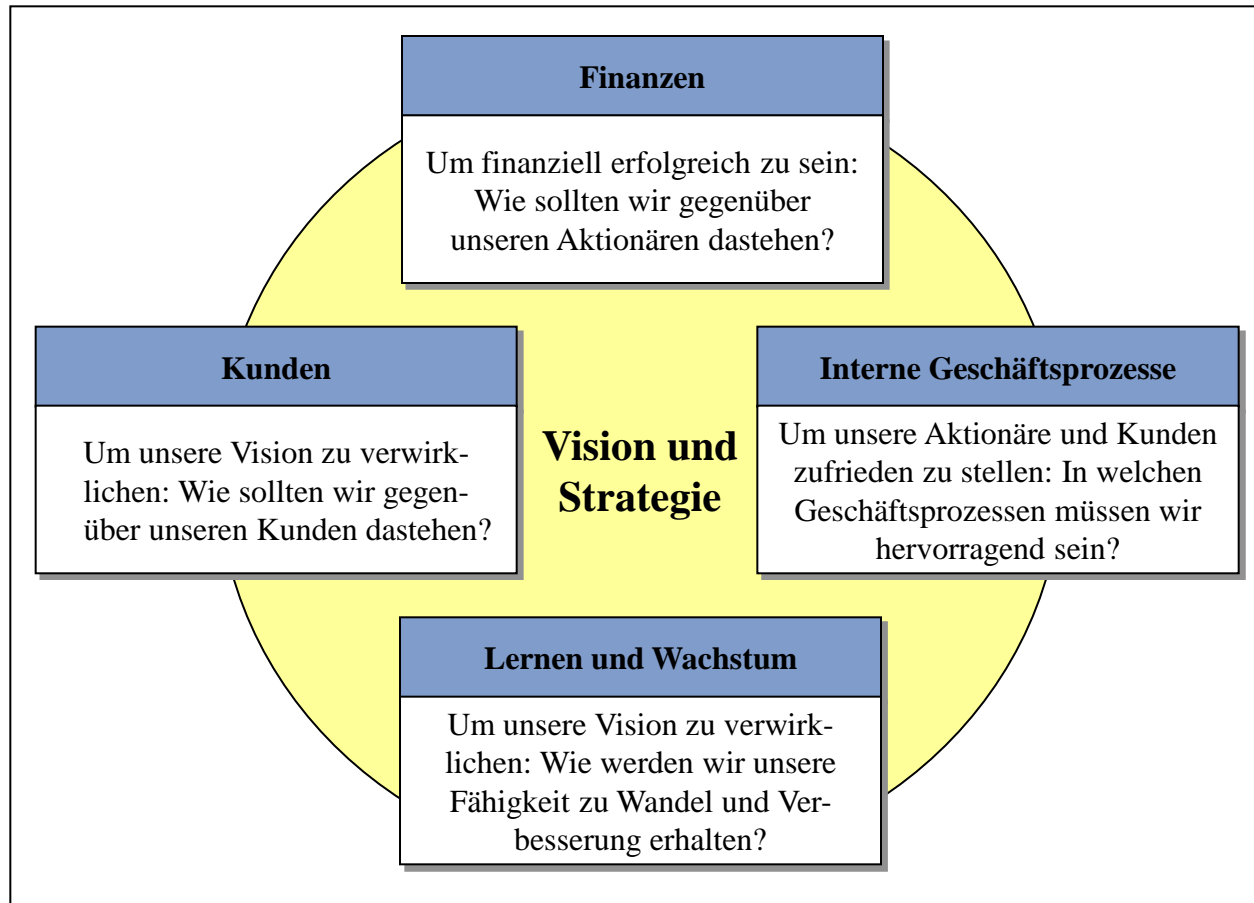

S. 964 Abb. 68

## Stufen der Personalkostenabrechnung

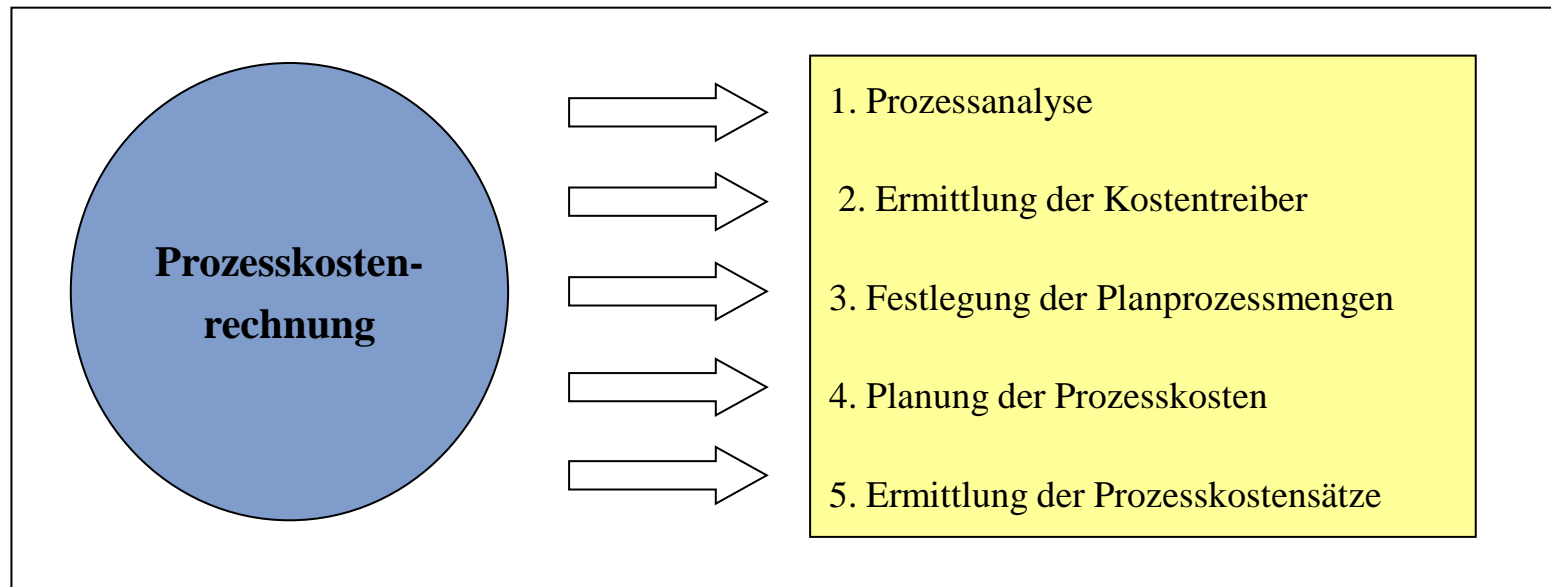

S. 965 Abb. 69

Jung, Hans: Personalwirtschaft, 9. Aufl., München 2010.

© Oldenbourg Wissenschaftsverlag



# Hauptvarianten der Organisation des Personalcontrolling

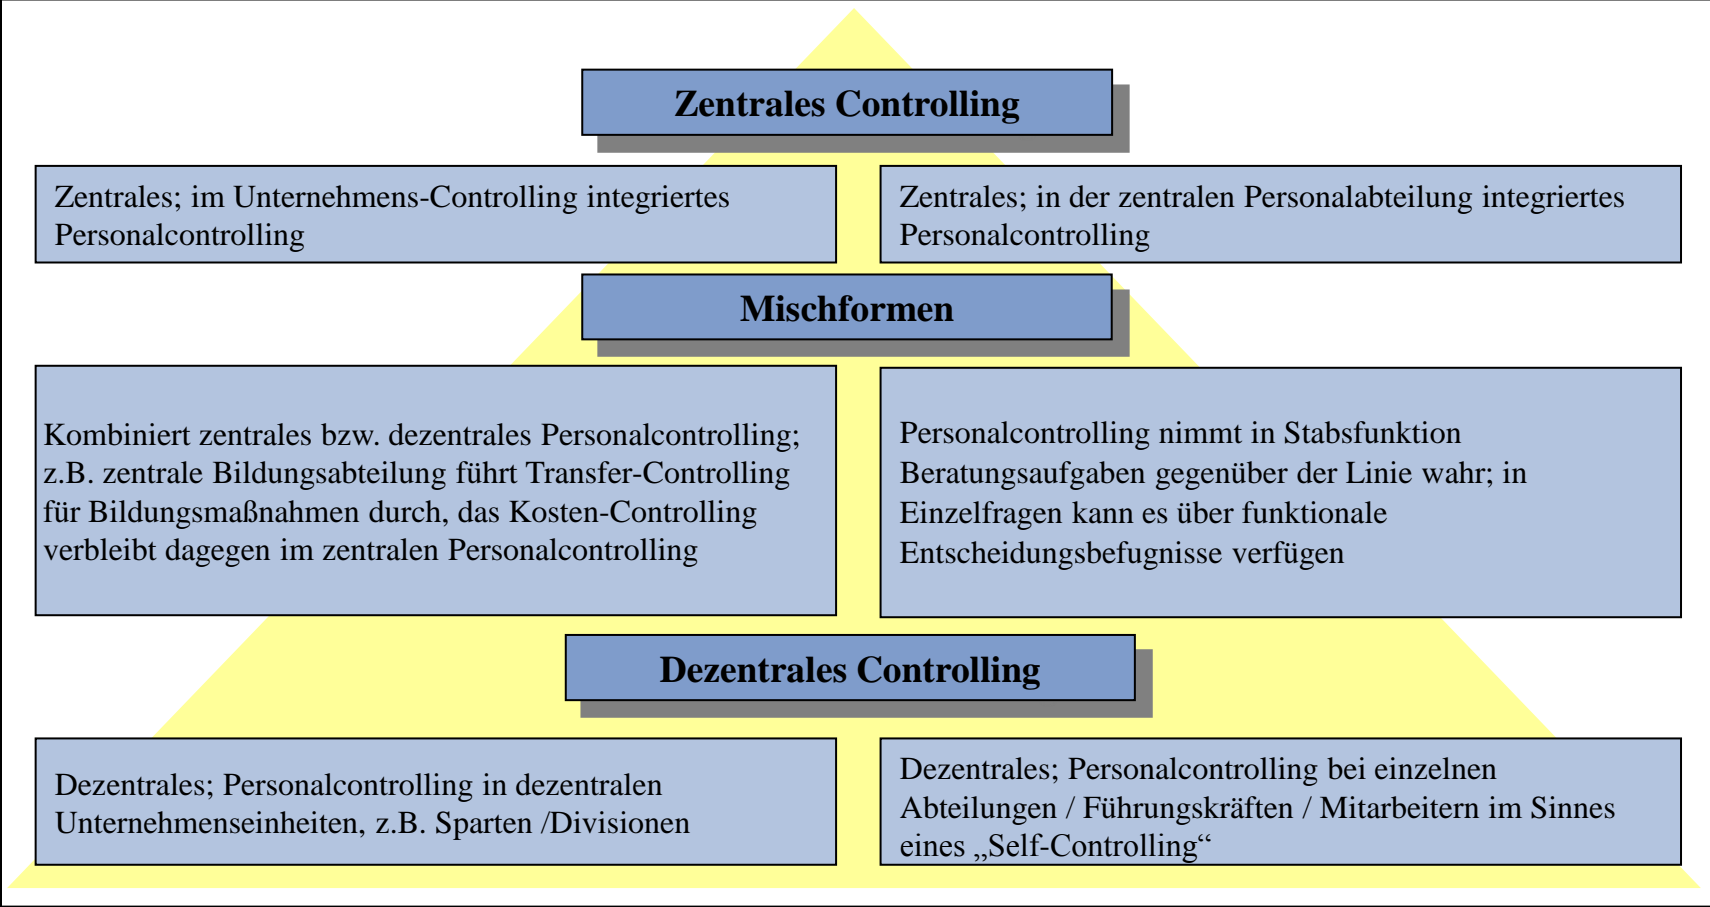

S. 967 Abb. 70  
(in Anlehnung an Oechsler, W. A.: Personal und Arbeit, Einführung in die Personalwirtschaft, 7. Aufl., München/Oldenbourg 2000, S. 178 ff)

Jung, Hans: Personalwirtschaft, 9. Aufl., München 2010.

© Oldenbourg Wissenschaftsverlag



## Notizen
