# Supplementary material
Source: publisher site journal article supplement (https://www.degruyterbrill.com/publication/isbn/9783486719048/downloadAsset/9783486719048_Folien--de.zip)
Supplement: Supplementary file 6 [file 9783486719048_Folien--de.zip]

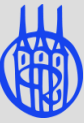

## Foliensatz als Dozentenvorlage

## Gesamtübersicht

|                                                           |              |
|-----------------------------------------------------------|--------------|
| <b>Teil A: Grundlagen der Personalwirtschaft</b>          | (133 Folien) |
| <b>Teil B: Personelle Leistungsbereitstellung</b>         | (220 Folien) |
| <b>Teil C: Leistungserhalt und -förderung</b>             | (292 Folien) |
| <b>Teil D: Informationssysteme der Personalwirtschaft</b> | (176 Folien) |
| <b>Teil E: Neuere Tendenzen und Entwicklungen</b>         | (112 Folien) |

- Hinweise:
1. Die Folien werden laufend aktualisiert bzw. überarbeitet und erweitert.
  2. Die Seitenangaben bzw. die Abbildungsnummerierungen beziehen sich auf die jeweils aktuelle Auflage des Buches Personalwirtschaft.
  3. Zu Literaturhinweisen vergleiche zugehörige Literaturverzeichnis.
